# Supplementary material
Source: PubMed Central journal article supplement (PMC3774280)
Supplement: NIHMS505616-supplement-1.pdf [file NIHMS505616-supplement-1.pdf]

## **Supplementary Information #1**

### **Supplementary Figures and Legends (p.1-20)**

Supplementary figures #1-20 with accompanying figure legends.

### **Supplementary Table 1 (p.21-91)**

List of genes identified as positive and negative regulators of normal growth using DESeq test of biological replicates.

### **Supplementary Table 2 (p.92-200)**

List of genes identified as positive and negative regulators of normal growth using Fisher's exact test of pooled samples.

### **Supplementary Table 3 (p.201-208)**

List of genes identified as positive and negative regulators of oncogenic growth using DESeq test of biological replicates.

### **Supplementary Table 4 (p.209-220)**

List of genes identified as positive and negative regulators of oncogenic growth using Fisher's exact test of pooled samples.

### **Supplementary Table 5 (p.221)**

List of RNAi constructs used in the study.

## **Supplementary Information #2**

Searchable Excel file containing lists of gene presented in Supplementary Tables 1-4.
