# Supplementary material
Source: PubMed Central journal article supplement (PMC3774280)
Supplement: NIHMS505616-supplement-2.pdf [file NIHMS505616-supplement-2.pdf]

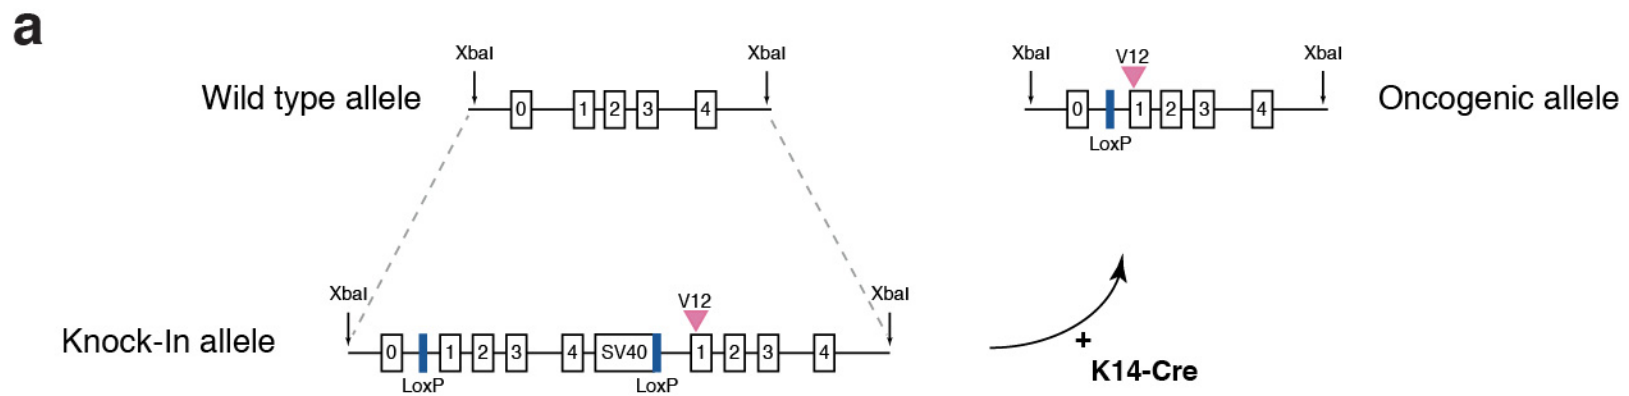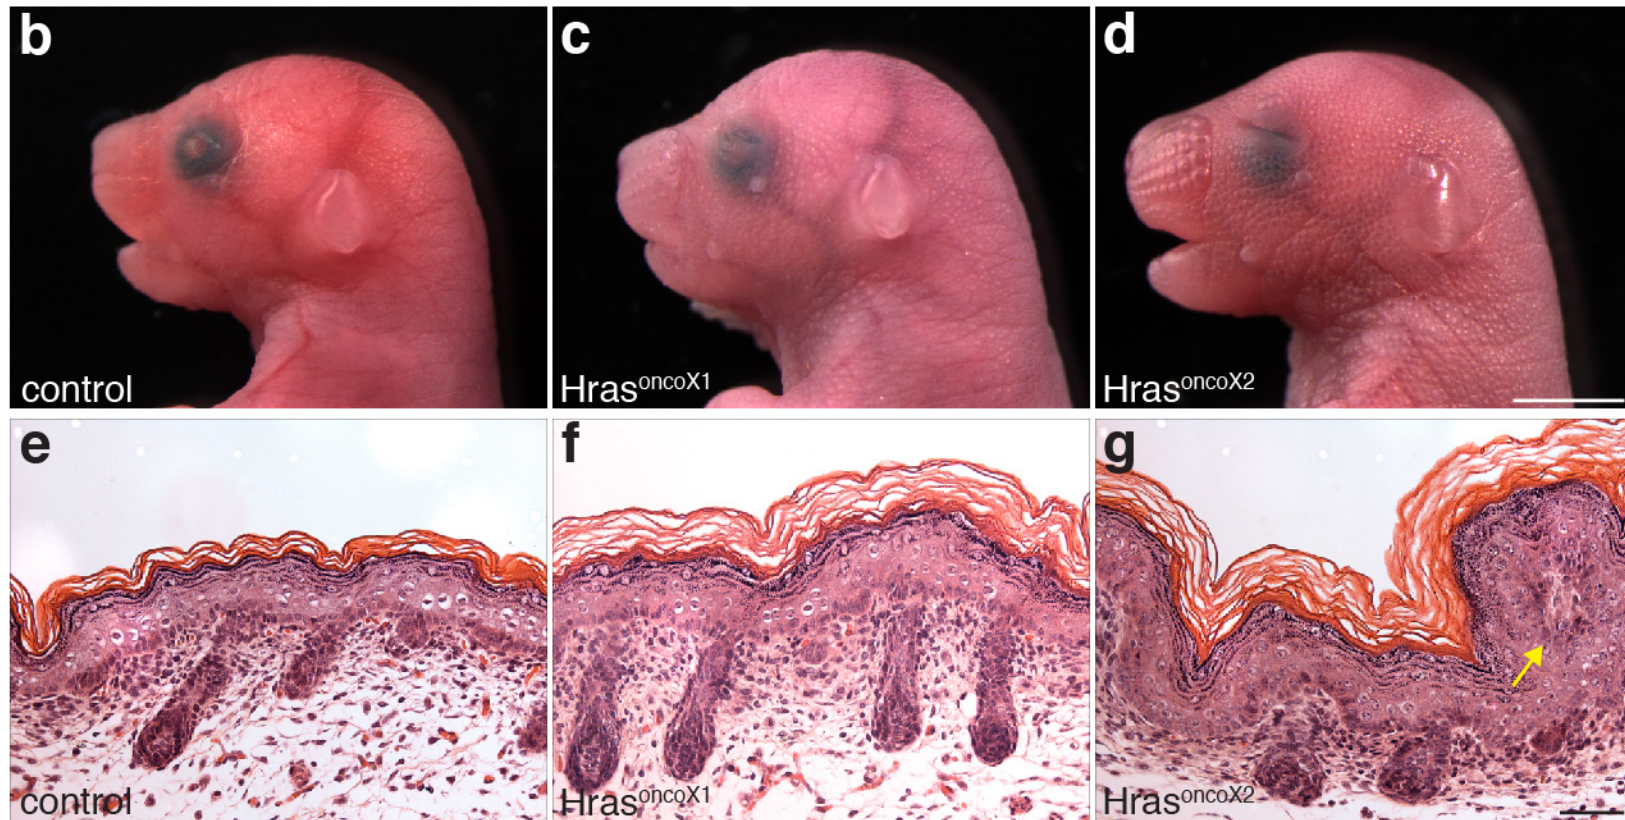

**Supplementary Figure 1. Oncogenic  $Hras^{G12V}$ -dependent epidermal growth.** **a**, Oncogene-dependent epidermal growth was modeled using a knock-in mouse where the endogenous *Hras1* locus was targeted with a cassette consisting of a loxP-flanked wild-type allele of *Hras1* followed by the oncogenic *Hras<sup>G12V</sup>* allele. Epidermal co-expression of K14-Cre-recombinase resulted in expression of oncogenic  $Hras^{G12V}$  at endogenous levels. **b-d**, Embryos at E18.5. Epidermal expression of one (**c**,  $Hras^{oncoX1}$ ) or two (**d**,  $Hras^{oncoX2}$ ) copies of oncogenic  $Hras^{G12V}$  results in dose-dependent increases in tissue growth evidenced by changes in whisker-pad and eyelid morphology, and increased opaqueness of the tissue. **(e-g)**, Sagittal sections of E18.5 skins are stained with hematoxylin and eosin. Note dose-dependent increases in epidermal thickness, and emergence of evaginations within the interfollicular epidermis of  $Hras^{oncoX2}$  (**g**, yellow arrow). Scale bars, **(b-d)** 3 mm, **(e-g)** 100  $\mu$ m.

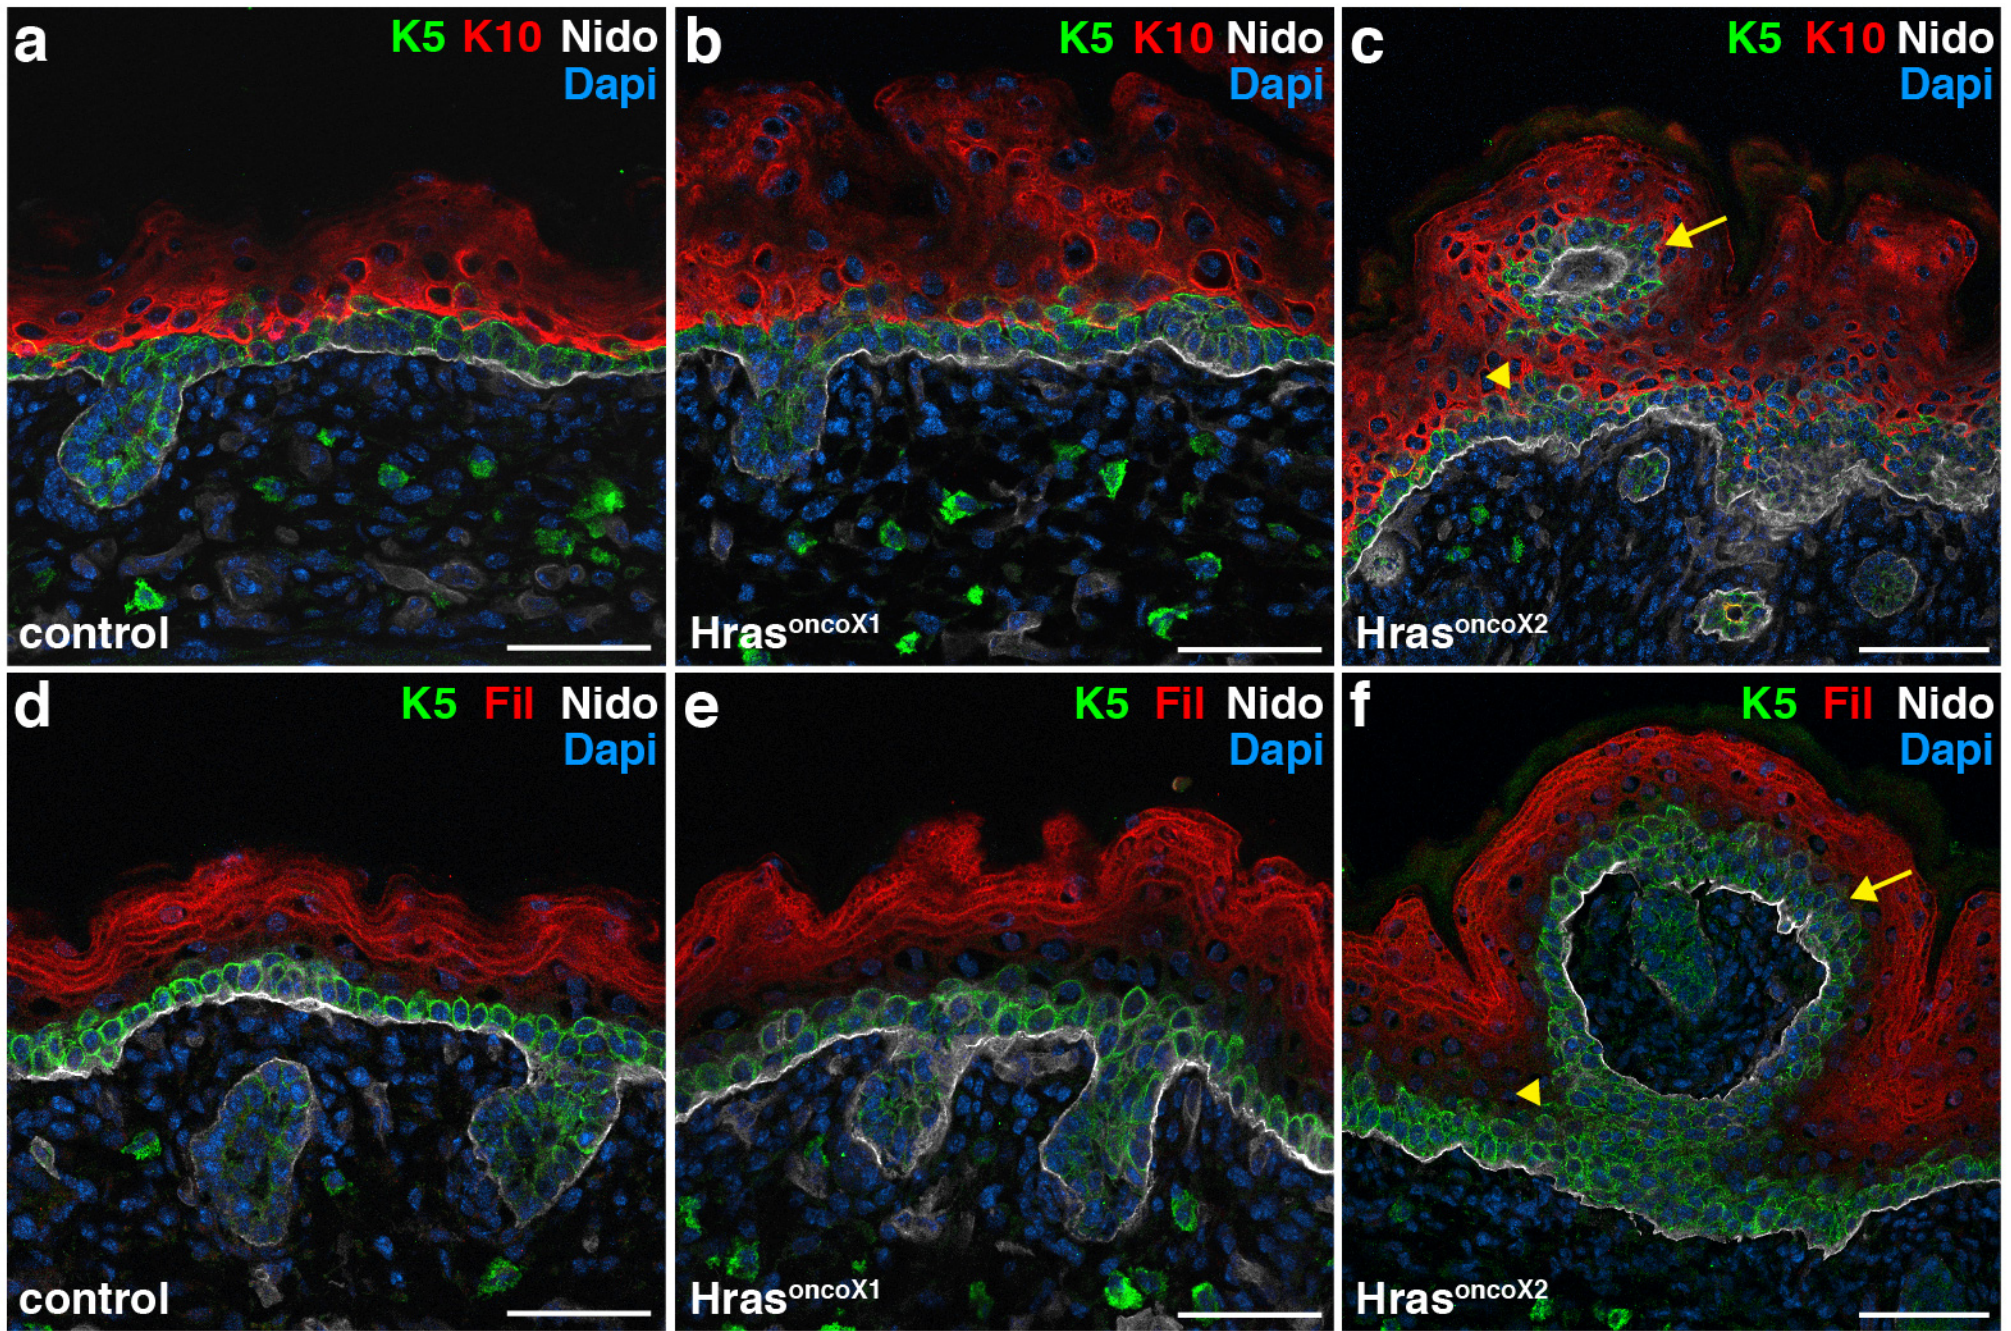

**Supplementary Figure 2. Epidermal expression of oncogenic *Hras<sup>G12V</sup>* during embryogenesis results in general hyperplasia and expansion of the progenitor cell layer.** **a-c**, Expression of progenitor (basal cell) marker keratin 5 (K5), and early differentiation (spinous cell) marker keratin 10 (K10) in E18.5 embryonic epidermis. **d-f**, Expression of K5 and late stage differentiation (granular cell) marker Filaggrin (Fil) in E18.5 embryonic epidermis. Note expansion of the K5<sup>+</sup> monolayer (yellow arrowhead) and formation of evaginations (yellow arrow) in *Hras<sup>oncoX2</sup>* interfollicular epidermis (**c,f**). Nidogen (Nido) and Dapi mark the basement membrane and the nuclei, respectively. Scale bars, 50 μm.

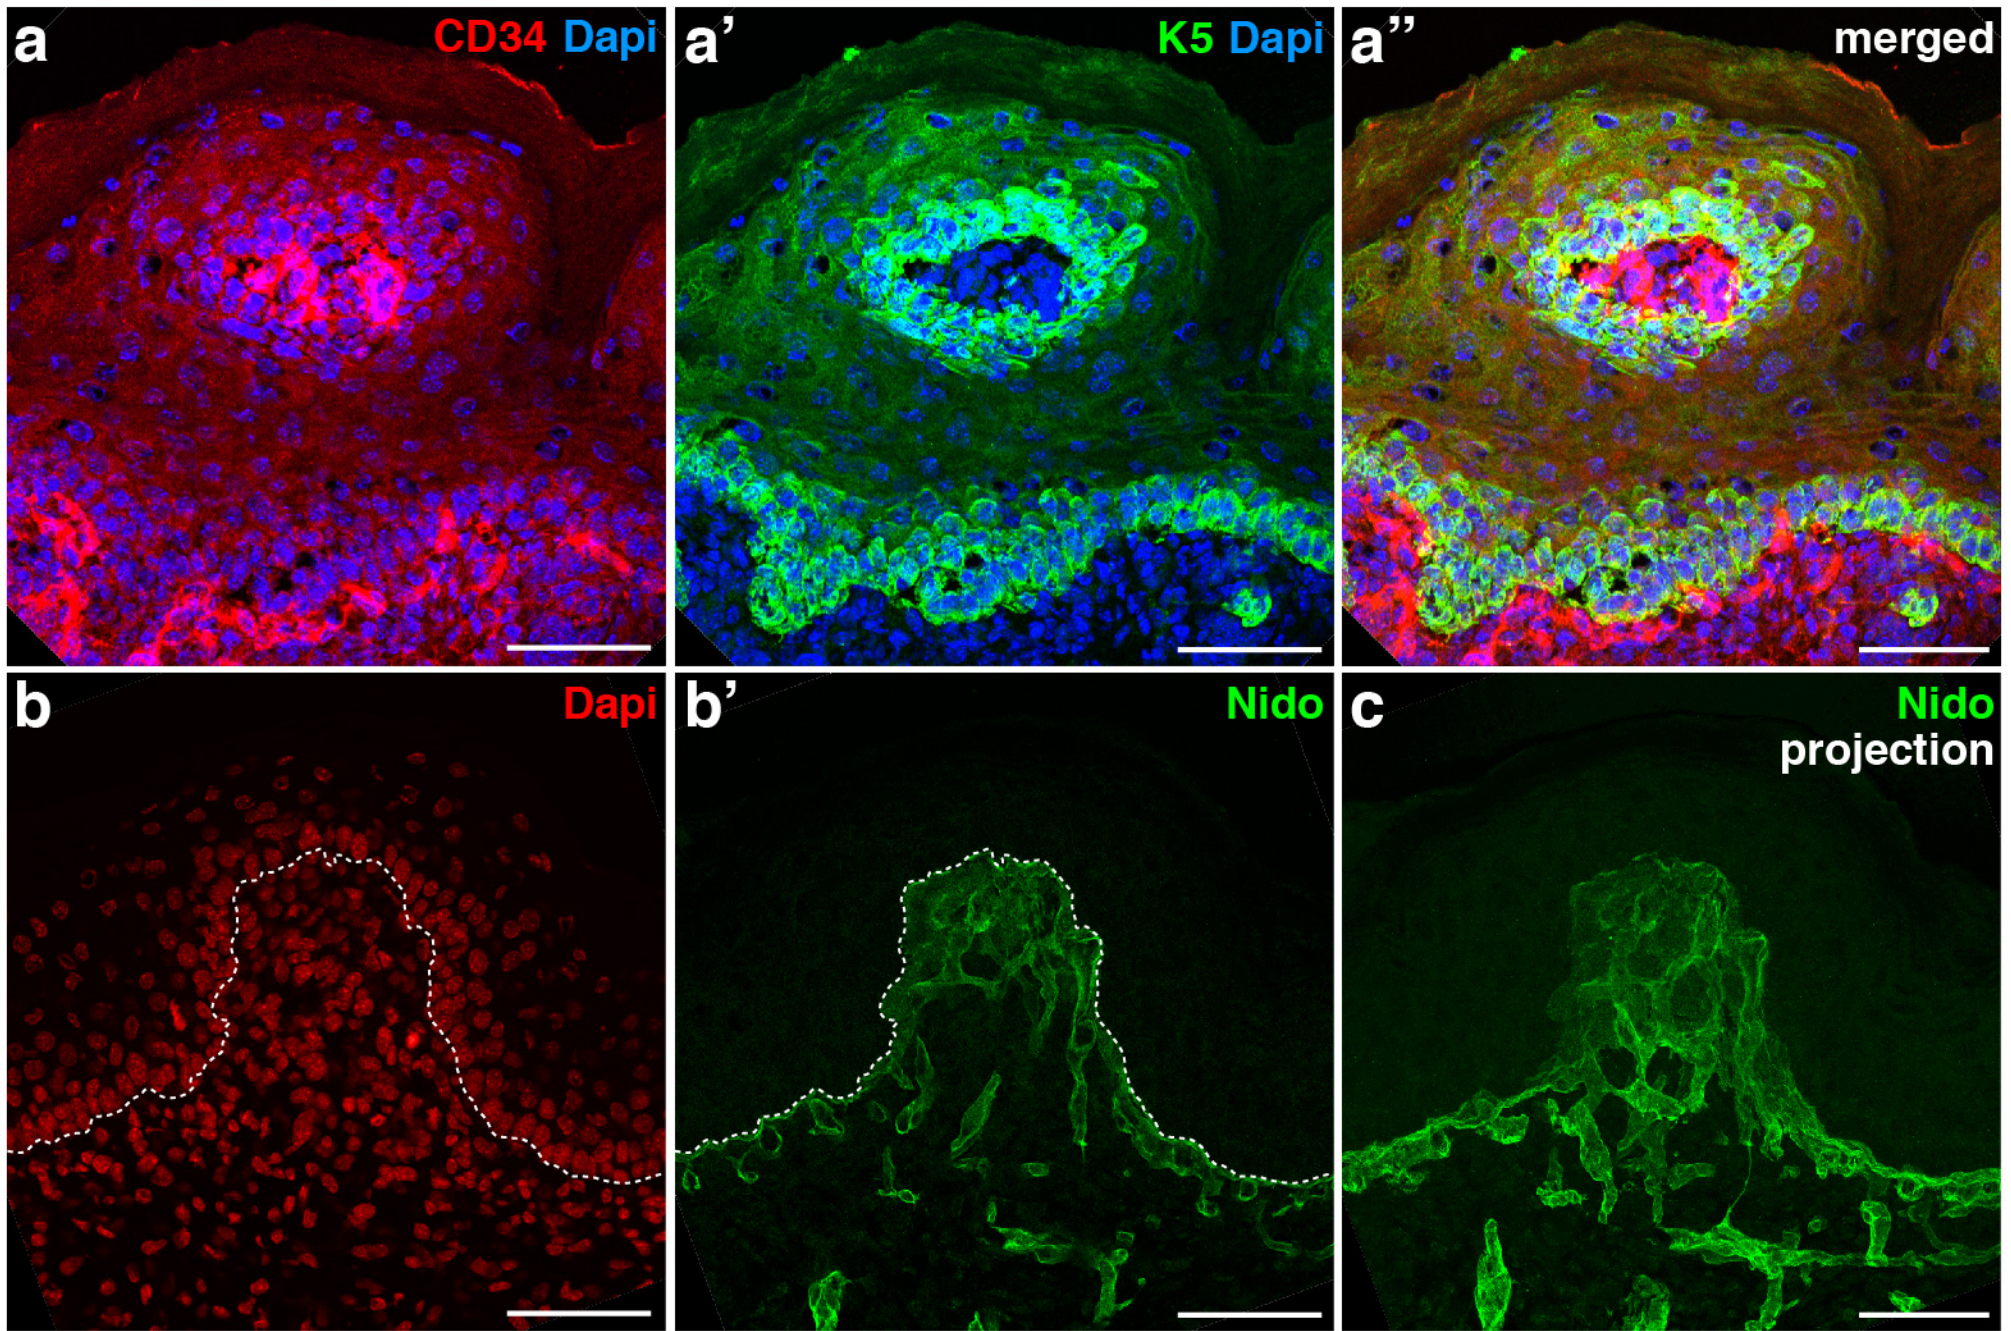

**Supplementary Figure 3. Epidermal expression of oncogenic  $Hras^{G12V}$  during embryogenesis results in dermal extrusions into the overlying epidermis.** **a**, Expression of dermal marker CD34 is detected in ectopic evaginations into the epidermis, which are surrounded by the progenitor cell marker keratin 5 (K5), in E18.5 embryonic epidermis. **b**, Larger dermal extrusions are also marked by the abundant network of blood vessels, marked by the expression of Nidogen (Nido). **c**, Maximum-projection of 10  $\mu\text{m}$  z-stack shows extensive capillary network labeled with Nidogen. Dapi marks the nuclei. Dotted line (**b**) marks the epidermal-dermal boundary. Scale bars, 50  $\mu\text{m}$ .

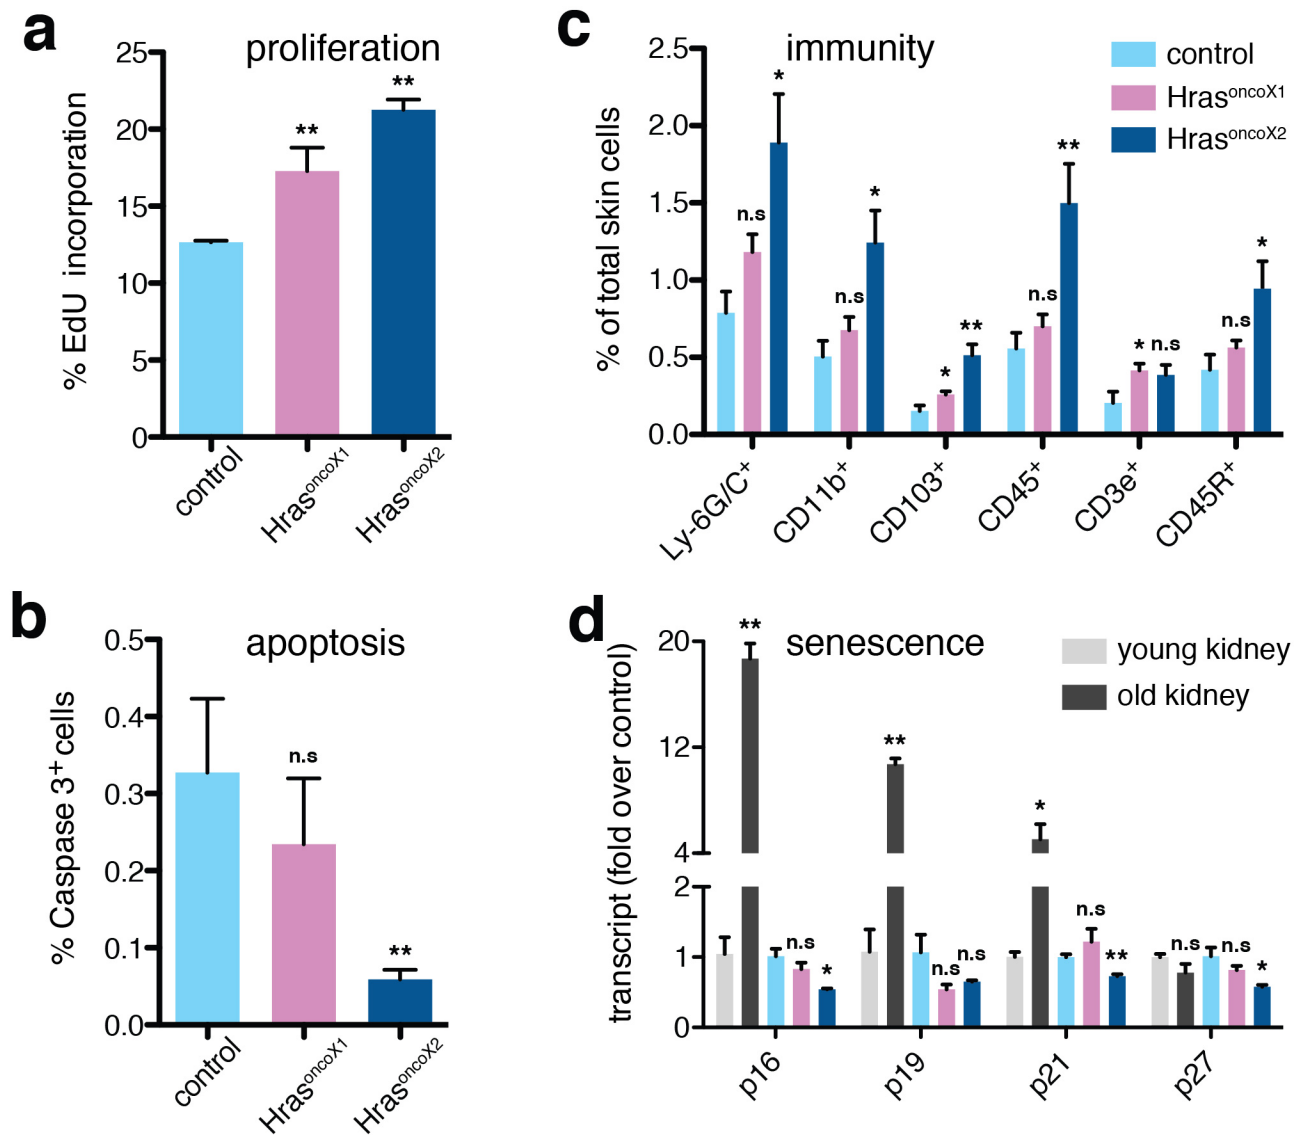

**Supplementary Figure 4. Expression of oncogenic Hras<sup>G12V</sup> during embryonic development results in increased proliferation, cell survival, and immune system activation.** **a-c**, Flow cytometric analysis of proliferation, apoptosis, and immune system activation in back skin epidermis (**a,b**) or complete back skin (**c**) at E18.5. **a**, The numbers of epidermal cells incorporating EdU (S-phase, proliferative) following a 2 hour pulse are significantly increased with expression of one ( $P=0.0063$ ) or two copies ( $P=0.0002$ ) of Hras<sup>G12V</sup>. Increasing dosage from Hras<sup>oncoX1</sup> to Hras<sup>oncoX2</sup> has a similar effect ( $P=0.0233$ ). **b**, Numbers of apoptotic Caspase 3<sup>+</sup> epidermal cells are reduced in Hras<sup>oncoX2</sup> animals compared to control ( $P=0.0085$ ) and Hras<sup>oncoX1</sup> ( $P=0.0355$ ). **c**, Increased numbers of innate and adaptive immune cells (granulocytes: Ly-6G/C, macrophages: CD11b, dendritic epidermal cells: CD103, leukocytes: CD45, T cells: CD3ε, B lymphocytes: CD45R) in E18.5 back skin are detected with epidermal expression of Hras<sup>G12V</sup>. **d**, Real-time PCR analysis of CDK inhibitor transcripts shows absence of senescence following epidermal Hras<sup>G12V</sup> expression. Comparisons of transcript levels in young and old kidneys served as a positive control for senescence. Error bars (**a-c**) indicate s.e.m and (**d**) s.d. All data points represent individual embryos with  $n=3$  (**a,b**),  $n=5$  (**c**, control), or  $n=6$  (**c**, Hras<sup>onco</sup>). In real-time PCR experiment (**d**), data are shown for 3 embryos and two separate real-time reactions ( $n=6$ ). n.s. (not significant,  $P>0.05$ ), \* ( $P\leq 0.05$ ), and \*\* ( $P\leq 0.01$ ) indicate statistical significance of comparison to control epidermis (**a-d**) and/or young kidney (**d**).

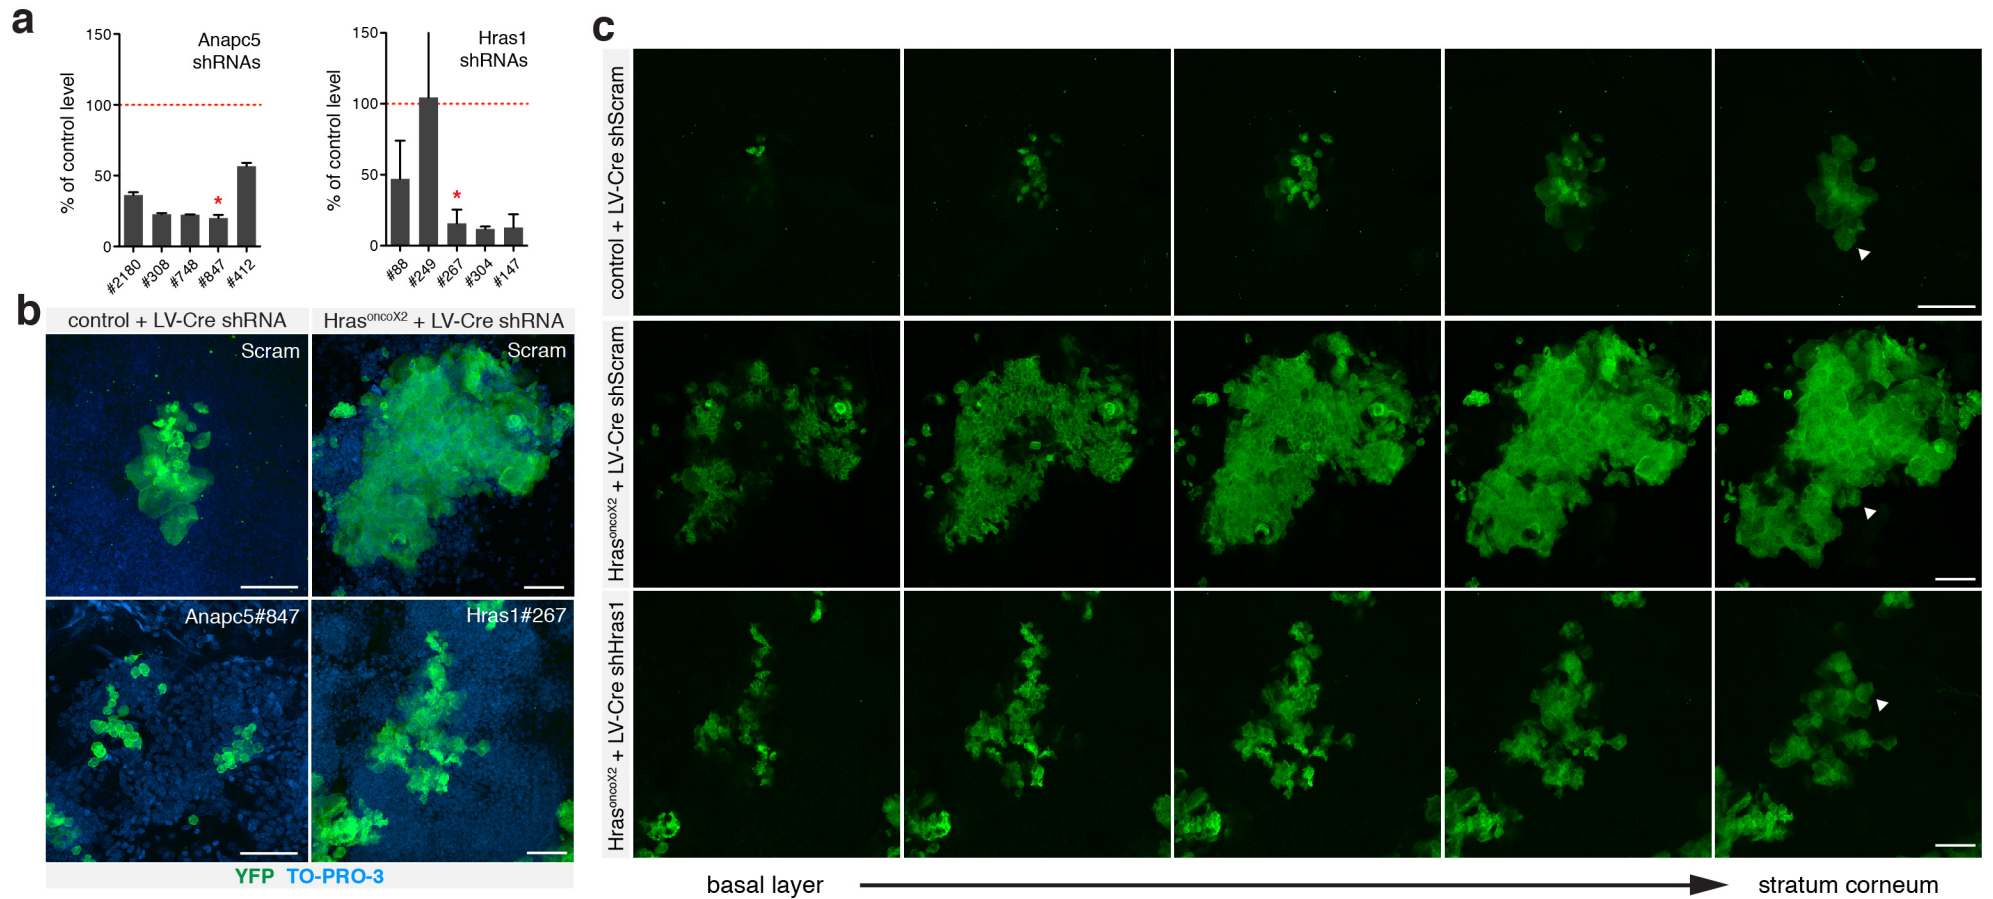

**Supplementary Figure 5. RNAi affects normal and oncogene-dependent clonal expansion of a cell transduced at E9.5 with a single shRNA molecule.** **a**, Real-time PCR analysis of *Anapc5* and *Hras1* transcript levels following shRNA-mediated knockdown. **b**, Transduced cell clones from E18.5 wild-type embryos infected at E9.5 with LV-Cre coexpressing scrambled or *Anapc5*#847 shRNAs, and Hras<sup>soncoX2</sup> embryos infected at E9.5 with LV-Cre coexpressing scrambled or *Hras1*#267 shRNAs. Note a decrease in clone size when cells are transduced with an shRNA targeting *Anapc5* (control) or *Hras1* (Hras<sup>oncoX2</sup>). **c**, Images from a z-series through epidermal clones at E18.5 (**b**) show normal cell morphology from the small cells in the deep-laying progenitor (basal) layer to the flattened superficial cells in the cornified envelope (stratum corneum). Transduced cells, YFP<sup>+</sup>; TO-PRO-3, nuclei. Error bars (**a**) indicate s.d. In real-time PCR experiment (**a**) data are shown for 3 embryos and two separate real-time reactions ( $n=6$ ). Red \* (**a**) indicate strongest shRNAs used for gene knockdown (**b,c**). Scale bars, 50  $\mu$ m.



**a**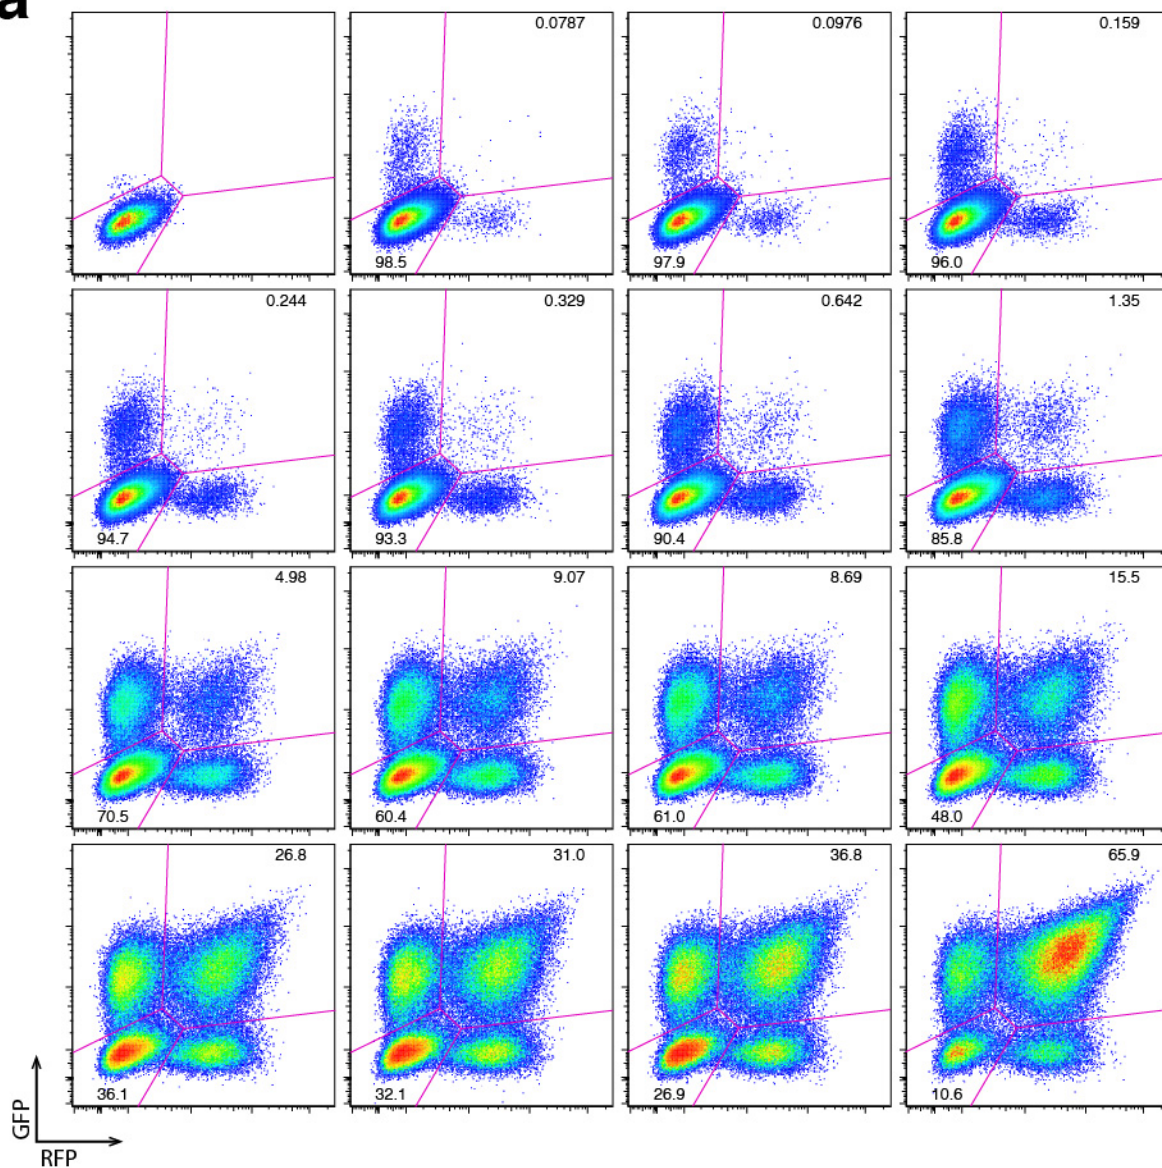**b**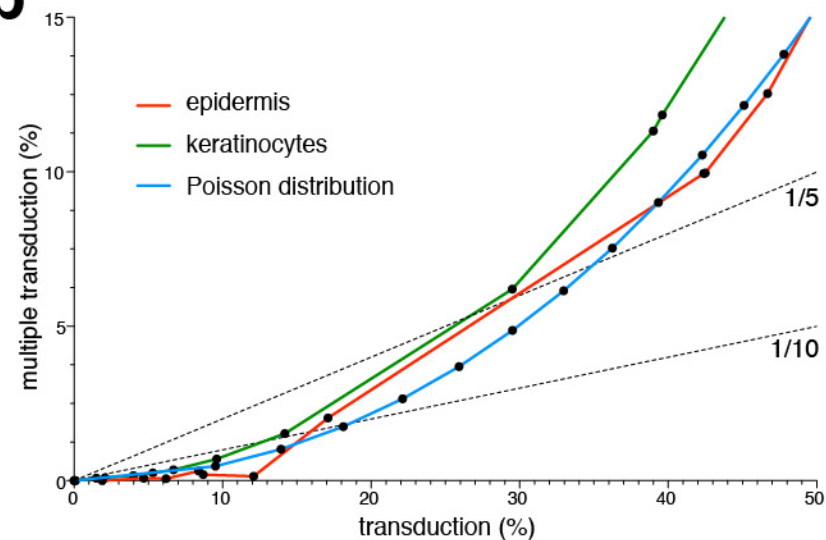**c**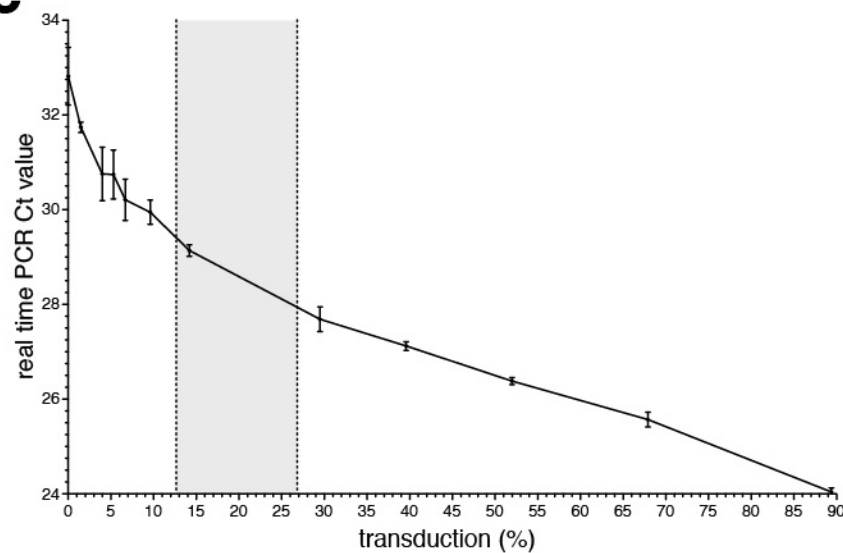

**Supplementary Figure 7. Most cells are infected at  $MOI \leq 1$  within the overall lentiviral transduction range of 15-25%. a**, Flow cytometric analysis of fluorescent protein expression in keratinocytes infected with increasing amounts of LV-GFP and LV-RFP mixture shows that multiple transductions increase with higher viral titre. **b**, Percentage of embryonic epidermal cells (red) and keratinocytes in culture (green) infected at  $MOI > 1$  as a function of overall transduction. Note that the observed relationships of multiple to total transduction can be described by the Poisson distribution (blue). **c**, Real-time PCR with lentiviral vector-specific primers is used to measure transduction level in the absence of fluorescent protein expression, as with pooled shRNA library. Lines representing 1/10 and 1/5 fraction of infections at  $MOI > 1$  mark the range used in the screen.

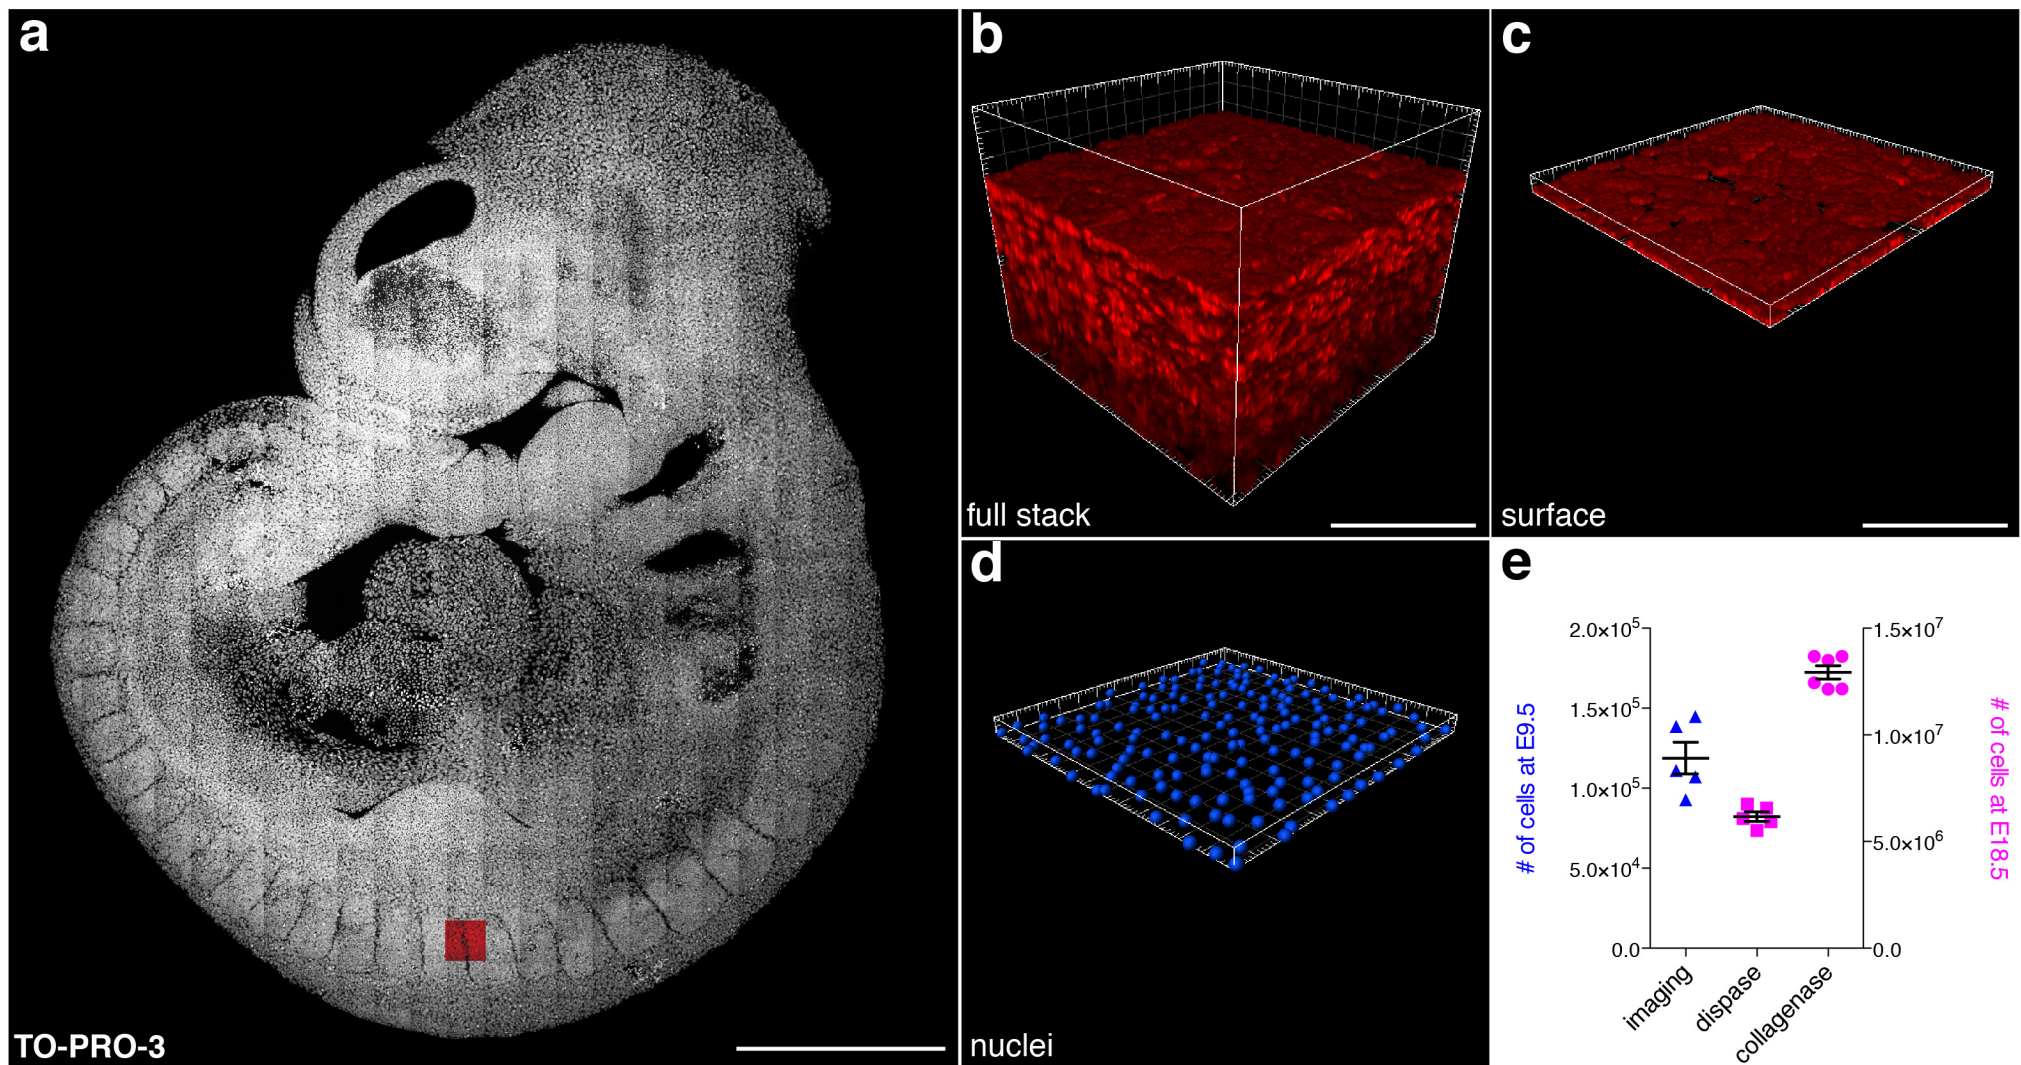

**Supplementary Figure 8. Surface ectoderm at E9.5 contains at least  $1.2 \times 10^5$  cells.** **a**, Whole-mount image of an E9.5 embryo stained with nuclear marker TO-PRO-3, stitched from ~650 individual tiles. **b**, A single tile from **a** (red square), shown as a 3D volume projection of a 70  $\mu\text{m}$  deep Z-stack. **c**, Top layer of cells, corresponding to surface ectoderm, from the Z-stack (**b**). **d**, Individual nuclei identified by segmentation of the surface layer (**c**). **e**, Counts of cells in the surface ectoderm at E9.5 from image analysis (blue), and cells in the interfollicular compartment (dispase/trypsin-treated epidermal fraction) or complete embryonic skin epithelium (collagenase-treated epithelial fraction, i.e. epidermis+hair follicles) at E18.5 (pink). Error bars indicate s.e.m. All data points represent individual embryos with  $n=5$  (imaging and dispase) or  $n=6$  (collagenase). Scale bars, **(a)** 500  $\mu\text{m}$ , **(b,c)** 50  $\mu\text{m}$ .



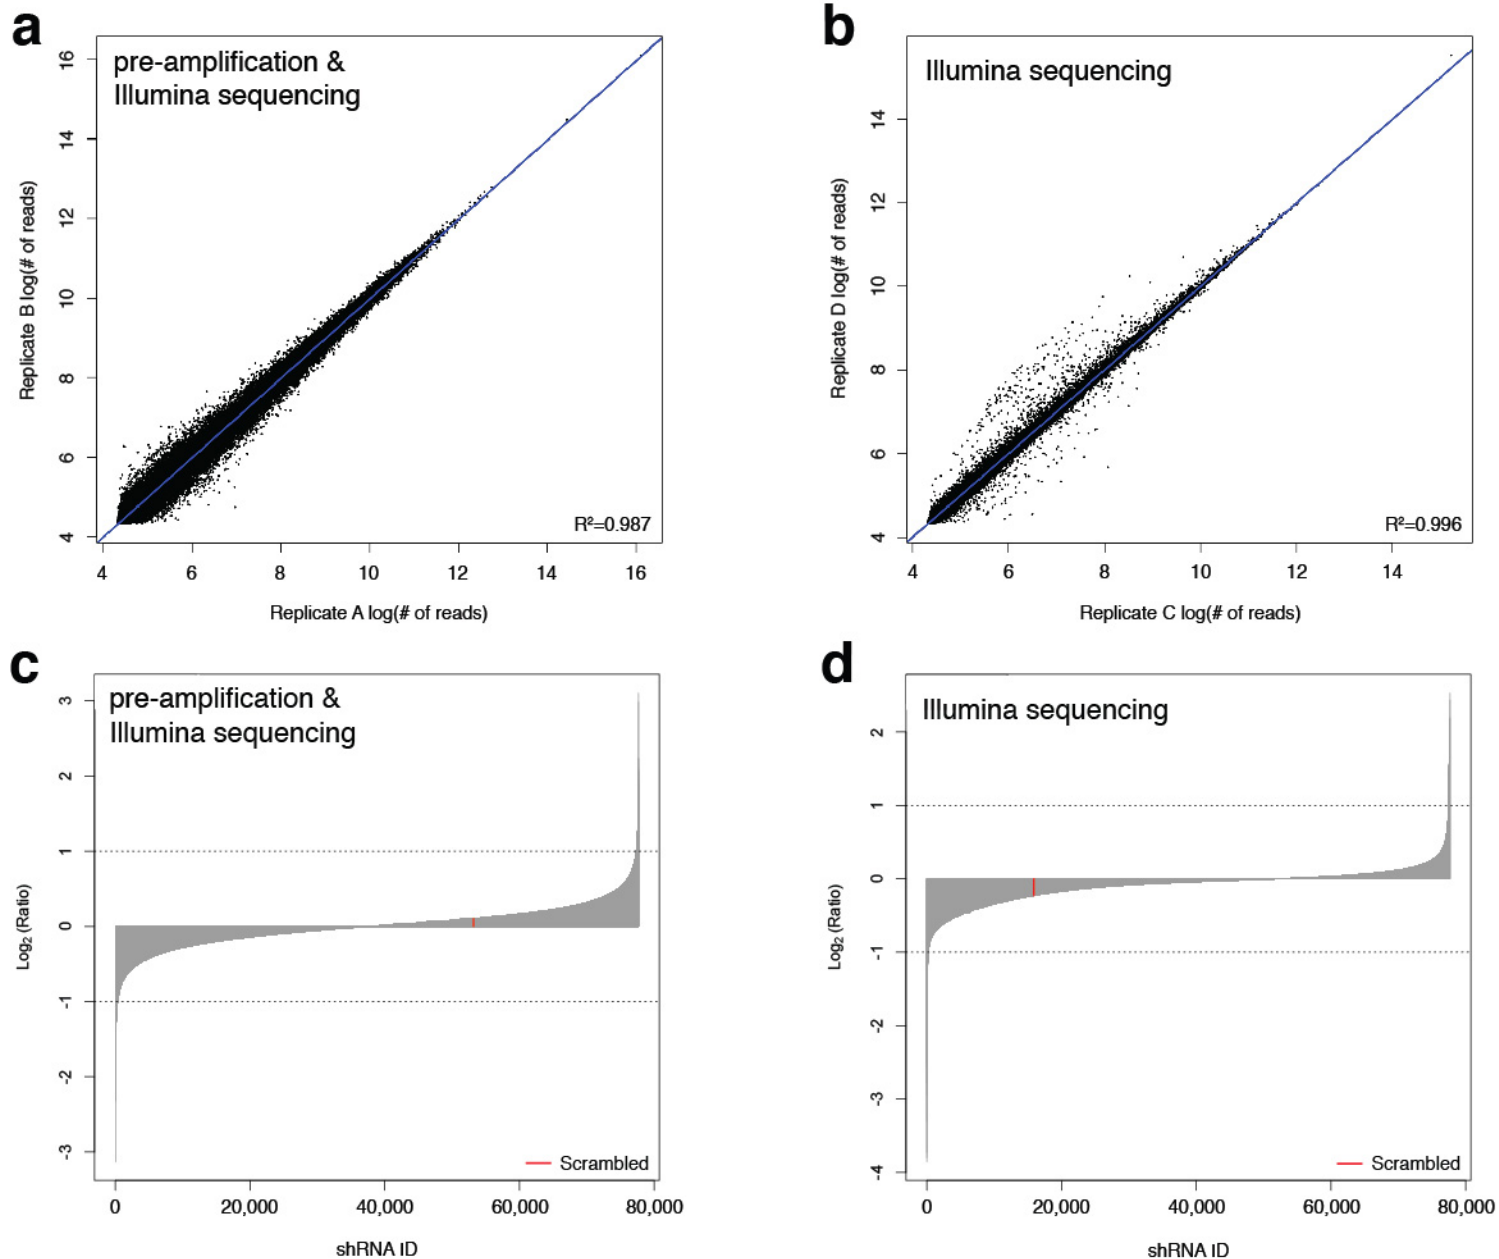

**Supplementary Figure 9. Pre-amplification and sequencing reactions are not a significant source of variability in the shRNA counts.** **a,b**, Relative counts of shRNA reads generated from technical replicates of sequencing runs. **a**, The two replicates, A and B, were generated from the same gDNA template [ $t=0(B)$ ] but were independently enriched for shRNA sequences by using our custom pre-amplification method. Samples were then subjected to independent Illumina sequencing runs. **b**, The two replicates, C and D, represent identical pre-amplified material that was sequenced by two independent Illumina runs.  $R^2$  values (**a,b**) indicate high similarity between technical replicates. **c,d**, Analysis of relative shRNA abundance in technical replicate runs identified only 625 (**c**) and 384 (**d**) of 77,717 total shRNAs (input) that exhibited a 2-fold enrichment or depletion. Based on our screen selection criteria (gene is a hit if two shRNAs show the same effect, and no shRNAs show the opposite), 8 (**c**) and 3 (**d**) genes of ~16,000 total were identified as significantly altered, underscoring the exceedingly low rate of false positives obtained due to noise and/or bias of pre-amplification or Illumina sequencing reactions. Scrambled (red) denotes the control shRNA.

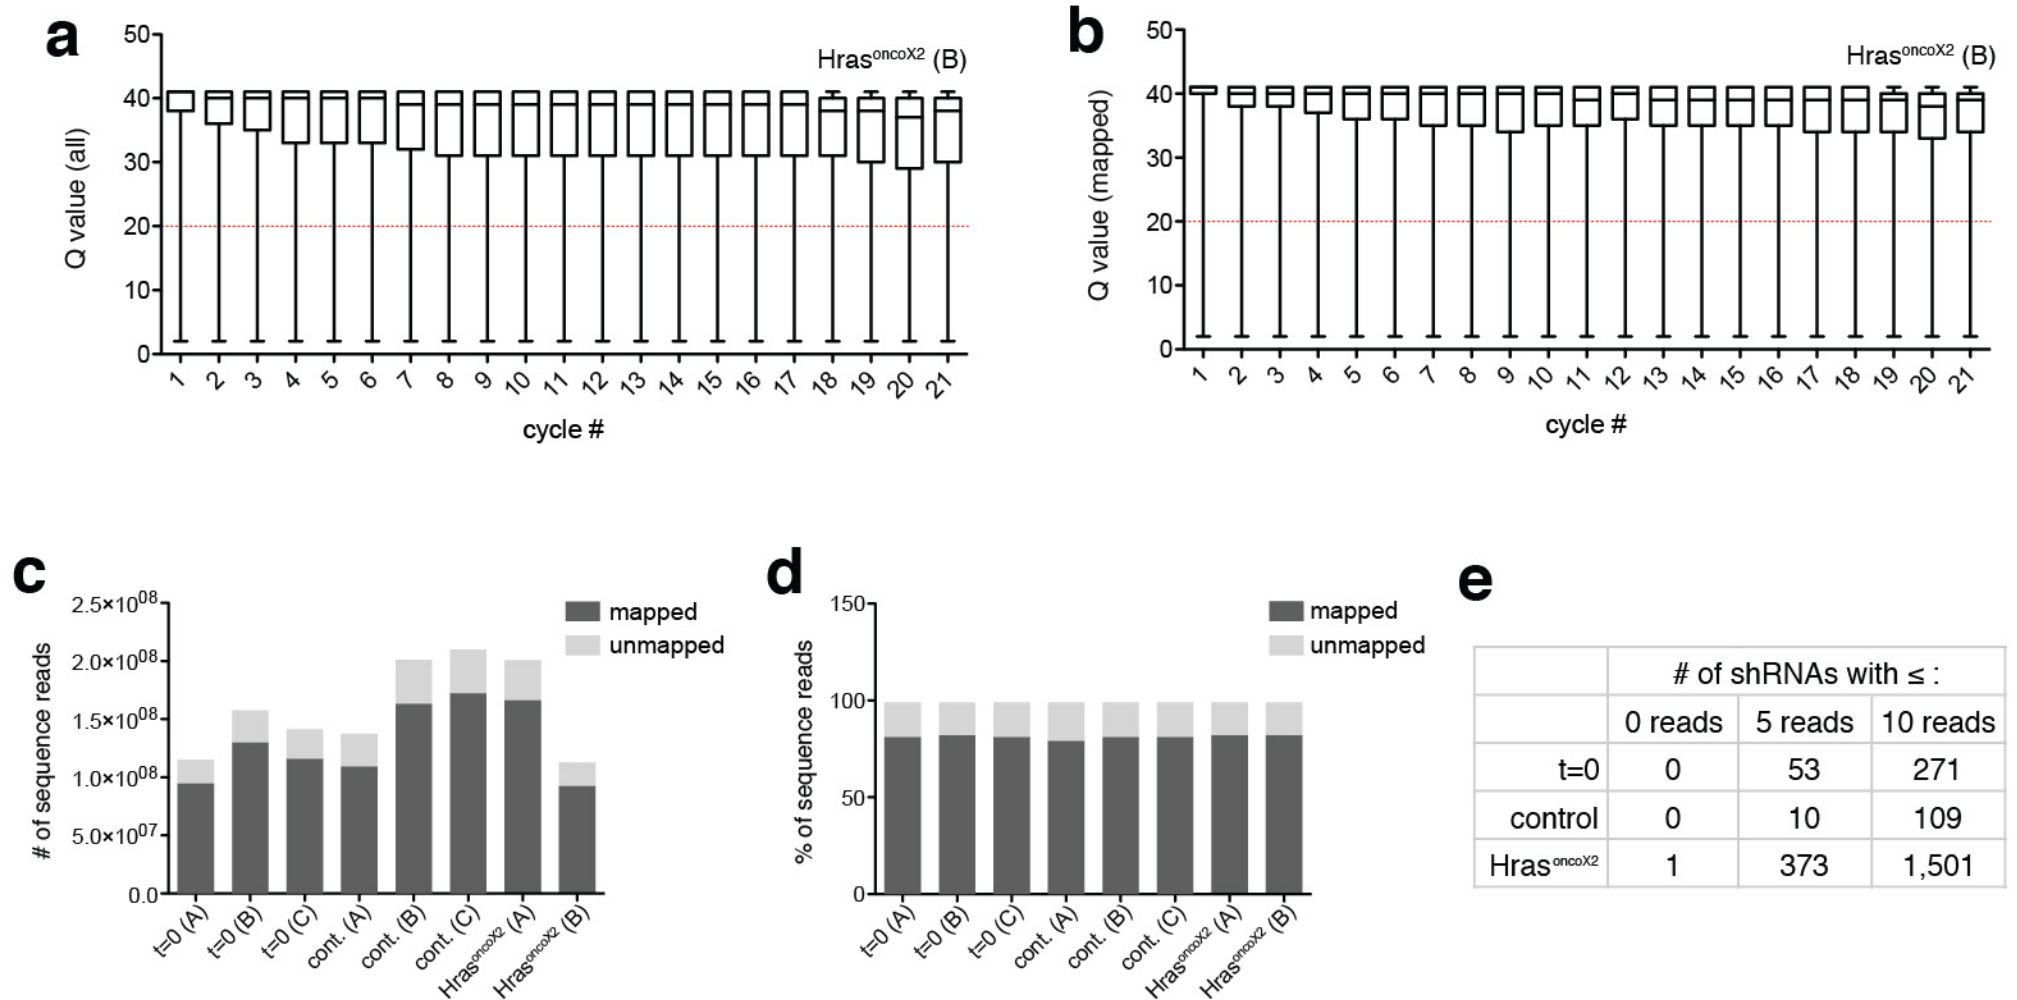

**Supplementary Figure 10. shRNA quantification method yields sequences of high quality and achieves complete coverage of the lentiviral pool.** **a,b**, Quality scores for a given base (Q-value) of the 21nt shRNA target sequence (cycle # corresponds to nt position) of the  $1.12 \times 10^8$  sequence reads of Hras<sup>oncoX2</sup> sample B (**a**), and the  $9.24 \times 10^7$  sequencing reads that correctly mapped to the library of 77,717 shRNAs (**b**). Red line represents Q-value of 20, and a  $P=0.01$  probability of an incorrect base call. **c,d**, Total number of sequencing reads across the samples ranged between  $1.12$ - $2.09 \times 10^8$  (**c**), with each sample having between 79-82% of correctly identified shRNAs (**d**). **e**, The screen achieved near complete coverage of the shRNA pool, with a single shRNA not identified in the Hras<sup>oncoX2</sup> sample, and less than 2% identified with 10 reads or less. Data in **a,b** are represented with box-and-whisker plots.

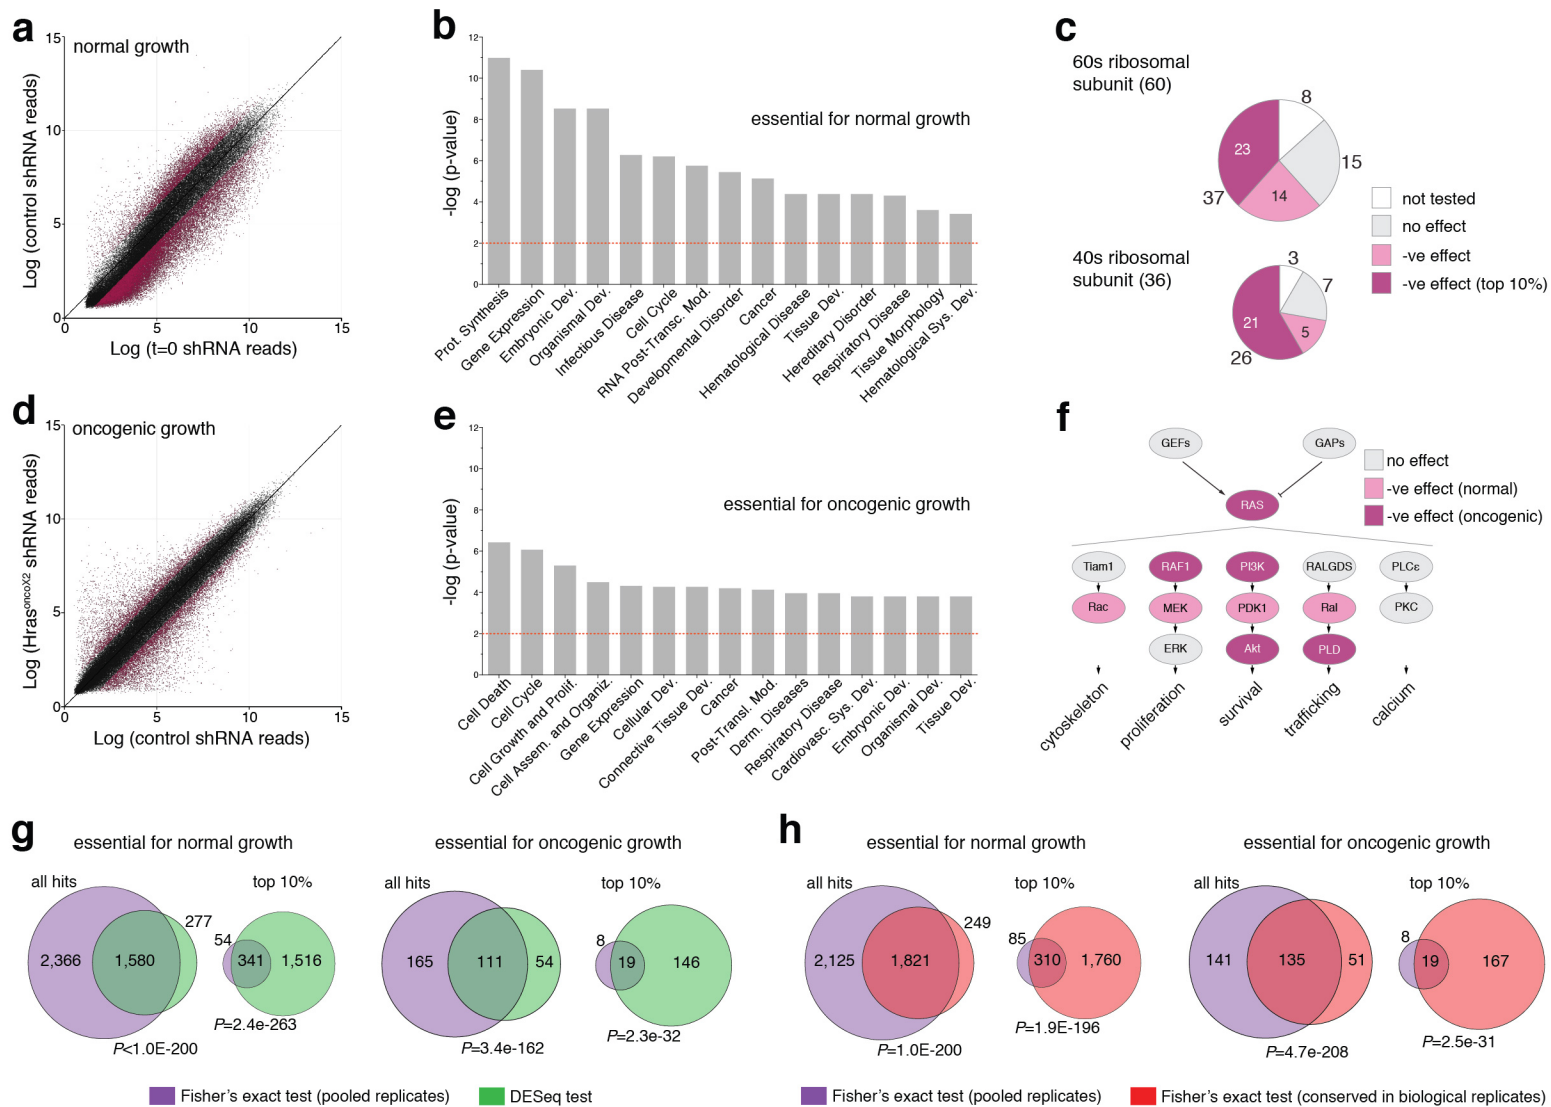

**Supplementary Figure 11. Different statistical analyses identify conserved sets of putative growth regulators.** **a-f**, Significantly enriched or depleted shRNAs identified using Fisher's exact test on pooled data sets. **a**, Dot plot of relative abundance of 77,717 shRNAs at  $t=0$  and in E18.5 control epidermis. **b**, Putative normal growth regulators are significantly enriched ( $P \geq 0.01$ ) for gene function categories that promote general cell viability and development. **c**, Genes scoring as essential for normal growth are enriched for ribosomal 60S and 40S subunits ( $P=1.12E-09$  and  $P=3.26E-07$ ), with many found in the top 10% of all hits (maroon). **d**, Dot plot of relative shRNA abundance at E18.5 in the control and  $Hras^{oncX2}$  epidermis. shRNAs that are significantly enriched or depleted are shown in maroon (**a,d**). **e**, Putative oncogenic growth regulators are enriched ( $P \geq 0.01$ ) in gene categories that promote cell viability and proliferation. **f**, Downstream effectors of Ras signaling score as essential for growth (pink), with many exhibiting an oncogene-specific requirement (maroon). **g,h** Analyses of the overlap between candidates identified as regulators of normal or  $Hras^{G12V}$ -dependent growth using Fisher's exact test on a pooled set of Illumina reads (purple) with: (**g**) candidates identified using DESeq test that directly accounts for variability among the biological replicates (green), or (**h**) candidates conserved in analysis of biological replicates using Fisher's exact test (salmon). Comparisons are shown for the full set of significant regulators (all hits), and the top 10% of significant regulators (top 10%). Probability that overlaps are due to chance is shown, suggesting significant conservation among identified regulators.

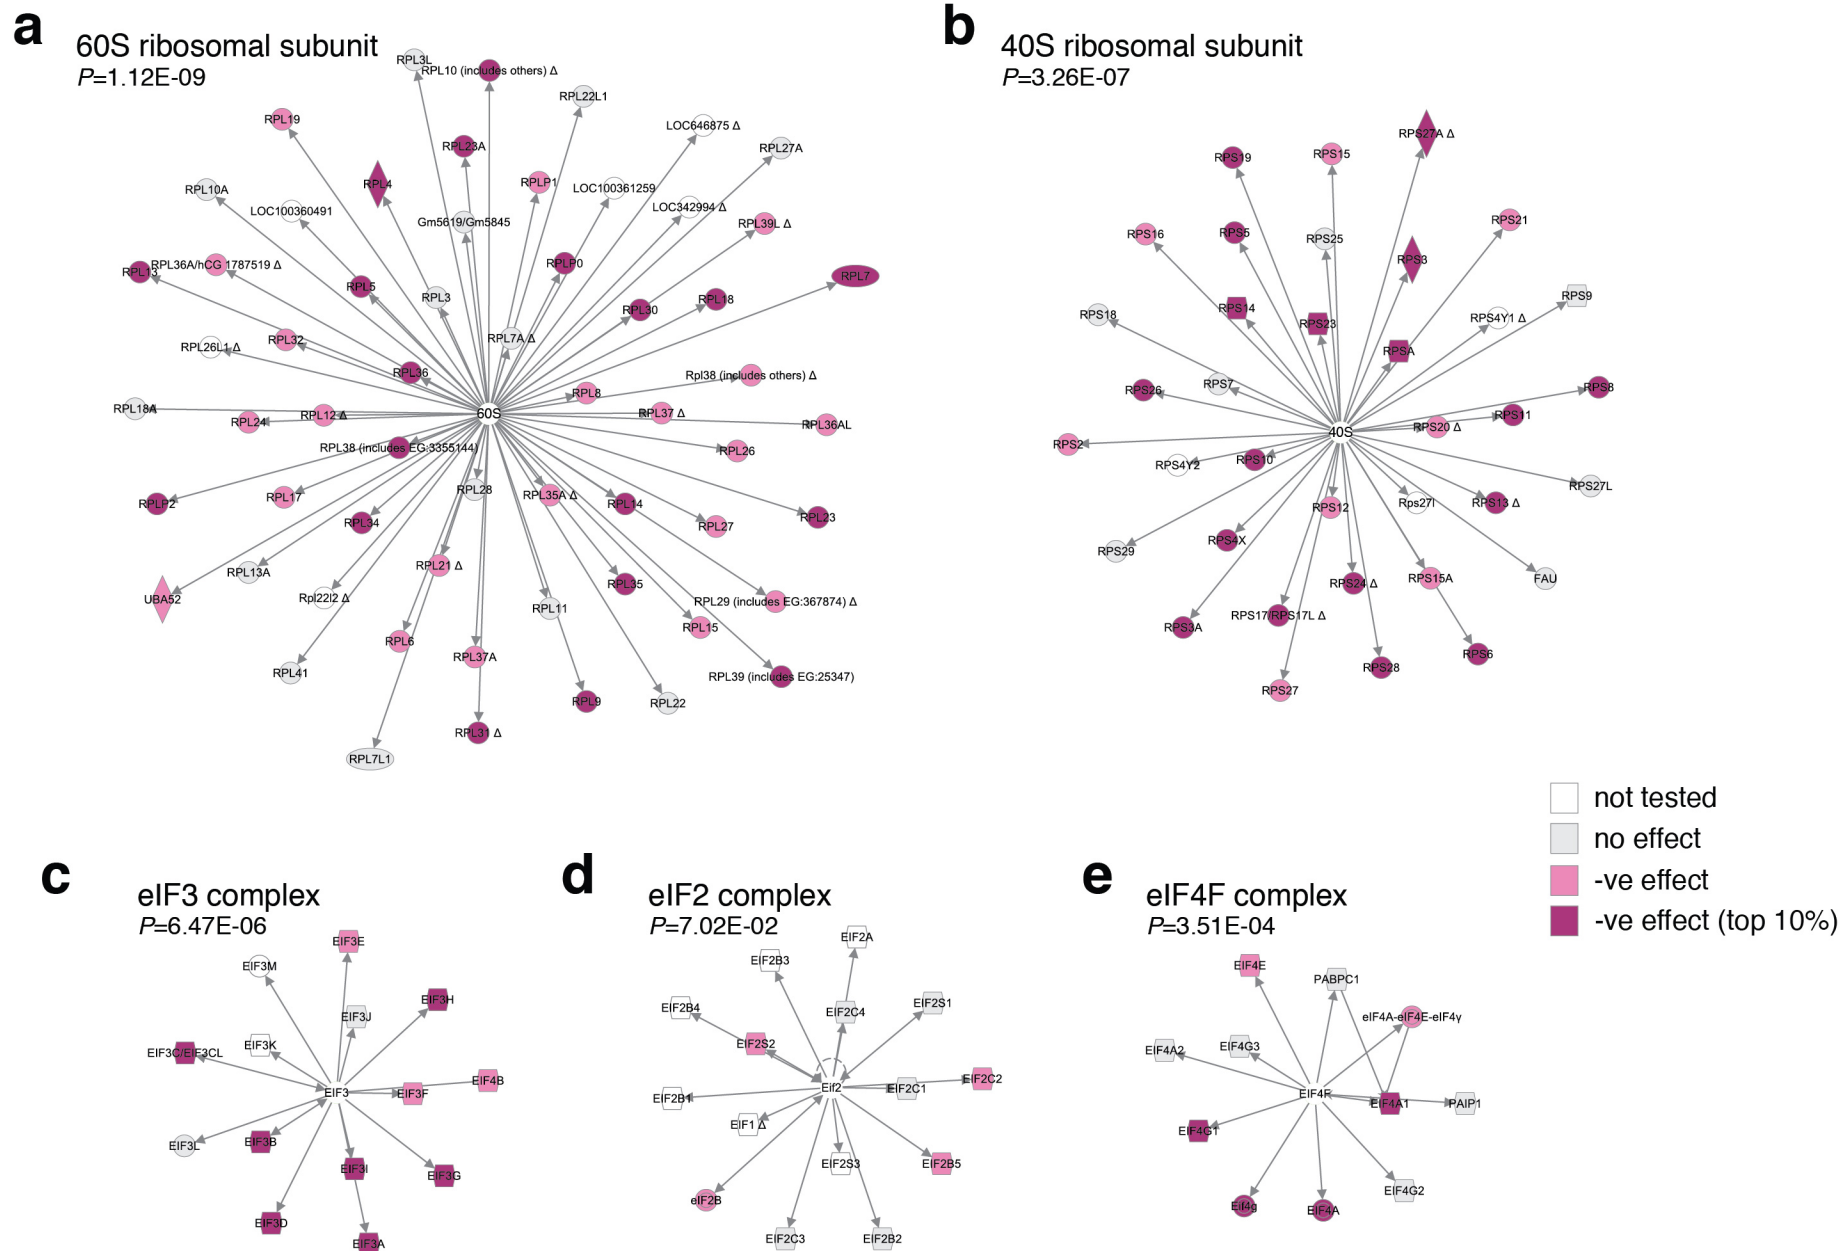

**Supplementary Figure 12. Genes that function in basic cellular processes are overrepresented among the hits identified by the screen for normal growth regulators.** **a-e**, Components of the translational machinery complexes including 60S (**a**) and 40S (**b**) ribosomal subunits, and eukaryotic initiation factor complexes eIF3 (**c**), and eIF4F (**e**) were significantly overrepresented among genes identified as essential for normal growth ( $P$ -value<0.05). Eukaryotic initiation factor 2 (eIF2, **d**) components were not significantly enriched. Color scheme identifies genes that were either: not targeted by the lentiviral shRNA pool (white); had no effect on growth (gray); significantly depleted during normal growth (pink); or significantly depleted and in the top 10% of all hits (maroon). –ve, negative.

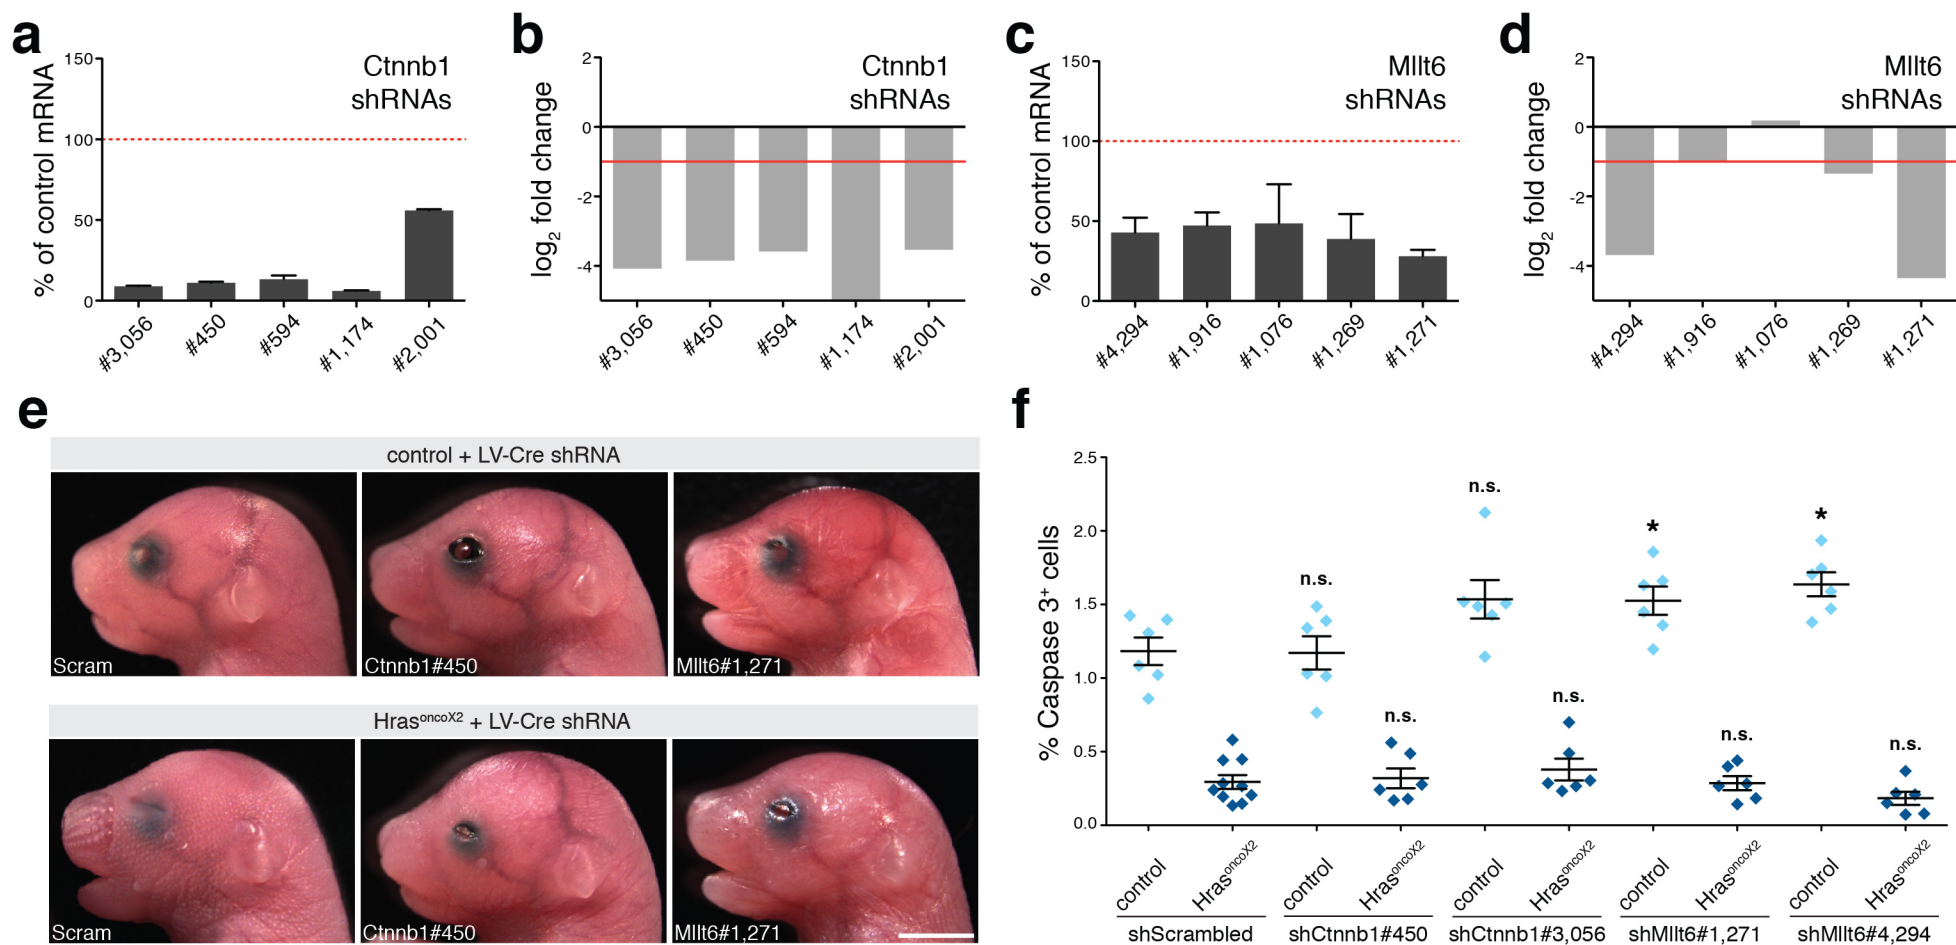

**Supplementary Figure 13.  $\beta$ -Catenin and Mlt6 are essential regulators of Hras<sup>G12V</sup>-dependent oncogenic growth.** **a-d**, shRNA-mediated transcript depletion of *Ctnnb1* ( $\beta$ -catenin) and *Mlt6* is proportional to severity of oncogenic growth inhibition. **a,c**, Control *Ctnnb1* (**a**) and *Mlt6* (**c**) mRNA levels (red dashed line) are significantly depleted after shRNA-mediated gene knockdown. **b,d**, *Ctnnb1* (**b**) and *Mlt6* (**d**) knockdowns elicit selective growth inhibitory effects on Hras<sup>G12V</sup> oncogenic relative to normal epidermis. Solid red line signifies a two-fold depletion. **e**, Representative control and Hras<sup>oncoX2</sup> embryos transduced at E9.5 with LV-Cre expressing shRNAs against *Ctnnb1* and *Mlt6* and analyzed at E18.5. **f**, Analysis of the relative abundance of Caspase 3<sup>+</sup> cells in the basal layer of control and Hras<sup>oncoX2</sup> epidermis transduced with LV-Cre expressing shRNAs. *Mlt6* depletion increases apoptosis in the control epidermis, while neither *Ctnnb1* nor *Mlt6* knockdown have an effect on cell death during oncogenic growth. Error bars indicate (**a,c**) s.d and (**f**) s.e.m. In real-time PCR experiment (**a,c**), data are shown for three independently transduced cell cultures, each analyzed in two independent reactions ( $n=6$ ). Apoptosis data points (**f**) represent individual embryos with  $n=6$  (all shCtnnb1 and shScram in control),  $n=7$  (shMlt6#4,294 in control),  $n=8$  (shMlt6#1,271),  $n=9$  (shMlt6#4,294 in Hras<sup>G12V</sup>), or  $n=10$  (shScram in Hras<sup>G12V</sup>), each scored through immunofluorescence analysis of ten 425.1  $\mu\text{m}^2$  images. **f**, n.s. (not significant,  $P>0.05$ ) and \* ( $P\leq 0.05$ ) indicate statistical significance of comparison to LV-Cre + shScrambled transduced control and Hras<sup>oncoX2</sup> epidermis. Scale bar, 3 mm.

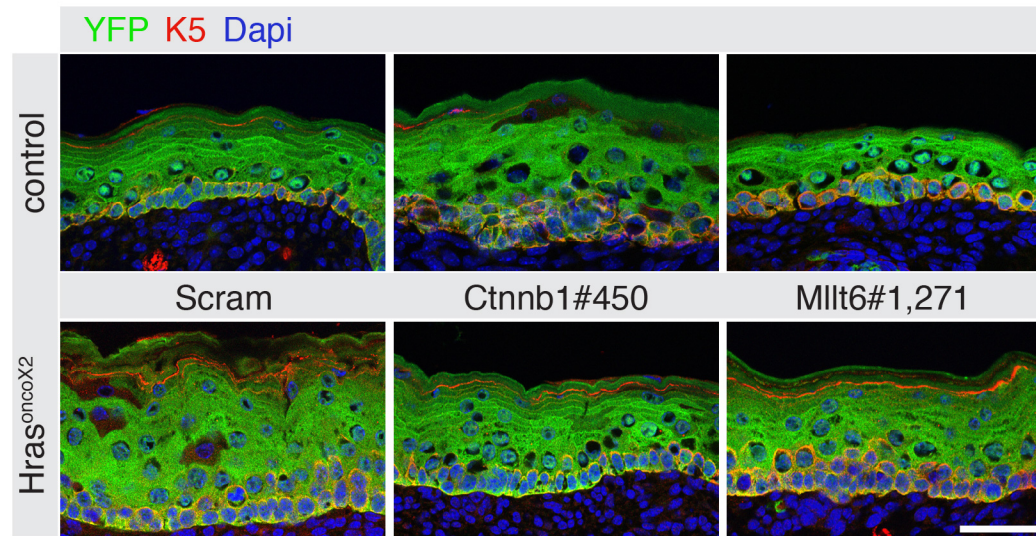

**Supplementary Figure 14. Depletion of  $\beta$ -catenin and Mlt6 affects epidermal thickness in control and Hras<sup>oncoX2</sup> animals.** Thickness of epidermis of control and Hras<sup>oncoX2</sup> animals transduced at E9.5 with shRNAs against *Ctnnb1* and *Mlt6* is strongly correlated with the rate of EdU incorporation (see Fig. 3e). YFP expression marks the transduced epidermis including the K5<sup>+</sup> basal layer. Dapi labels the nuclei. Scale bar, 50  $\mu$ m.

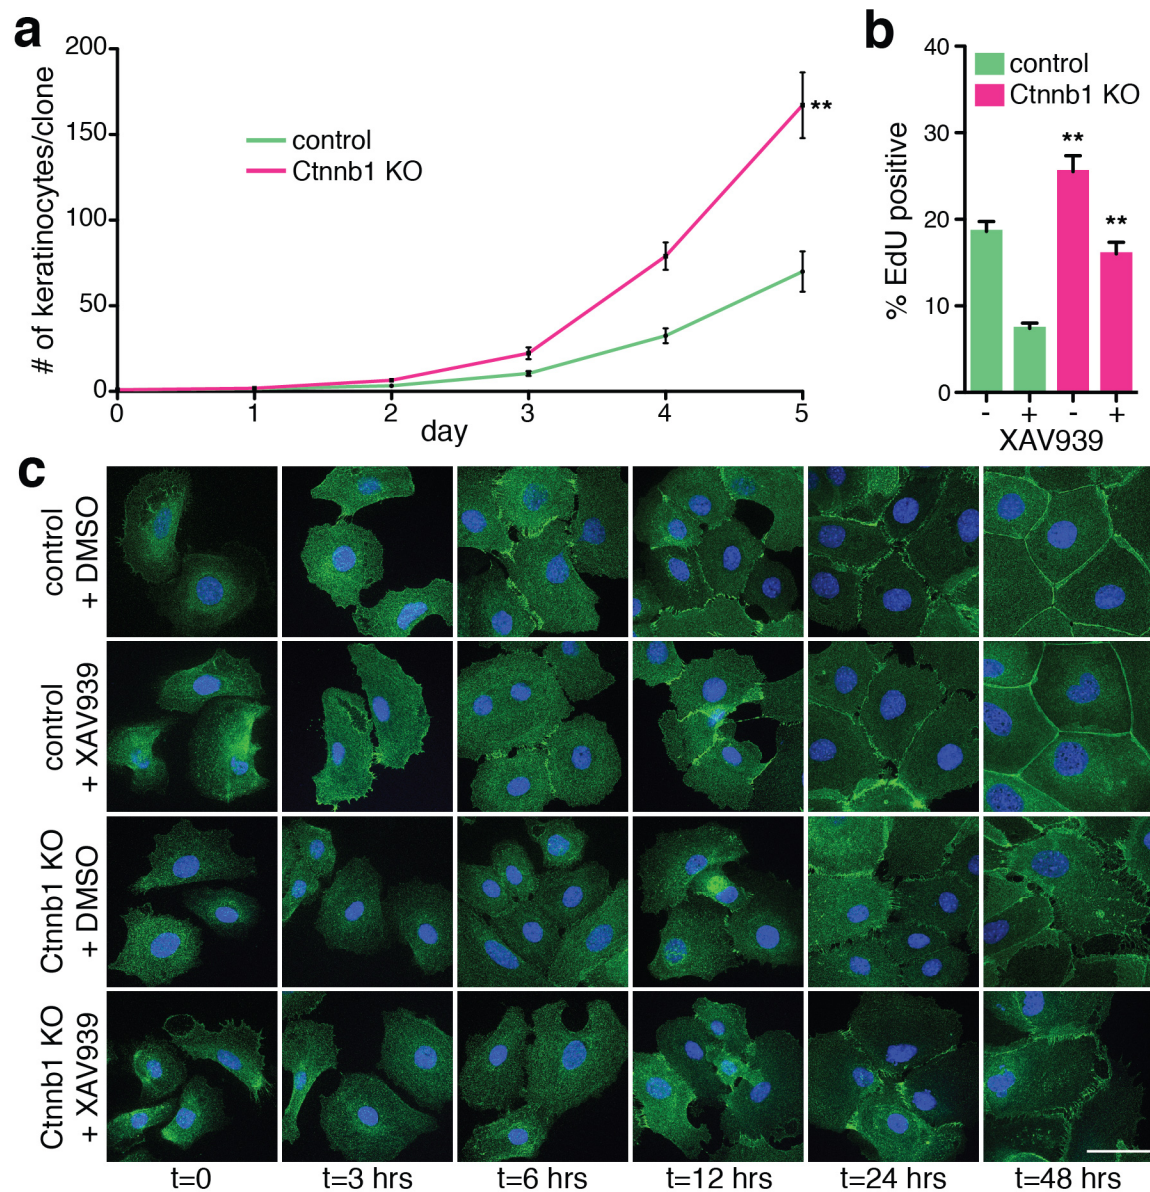

**Supplementary Figure 15. Loss of  $\beta$ -catenin results in Wnt-independent hyperproliferation and loss of cell-cell adhesion.** **a,b**, *Ctnnb1* knockout (Ctnnb1 KO) keratinocytes show significant increase in clonal expansion (**a**,  $P=0.0229$ ) and EdU incorporation in culture (**b**,  $P=0.005$ ). Treatment of control and *Ctnnb1* KO cells with a Wnt signaling inhibitor (XAV939) results in a marked reduction in EdU incorporation in both, yet the significant difference between control and *Ctnnb1* knockout cells is maintained ( $P=0.0005$ ), consistent with it being due to Wnt-independent role of  $\beta$ -catenin. **c**, Establishment of cell-cell contacts following  $\text{Ca}^{2+}$  switch is impaired in *Ctnnb1* knockout keratinocytes, and is unaffected by disruption in Wnt-signaling. E-cadherin (green) marks the adherens junctions as they are being formed, and Dapi (blue) marks the nuclei. Error bars indicate s.e.m. (**a**) and s.d. (**b**). Data points represent (**a**) individual cell clones with  $n=12$  (control) or  $n=16$  (Ctnnb1 KO) or, (**b**) independent wells with  $n=3$ . n.s. (not significant,  $P>0.05$ ), \* ( $P\leq 0.05$ ), and \*\* ( $P\leq 0.01$ ) indicate statistical significance of comparison to control keratinocytes (**a**, **b**) or keratinocytes treated with a Wnt inhibitor (**b**). Scale bar, 50  $\mu\text{m}$ .

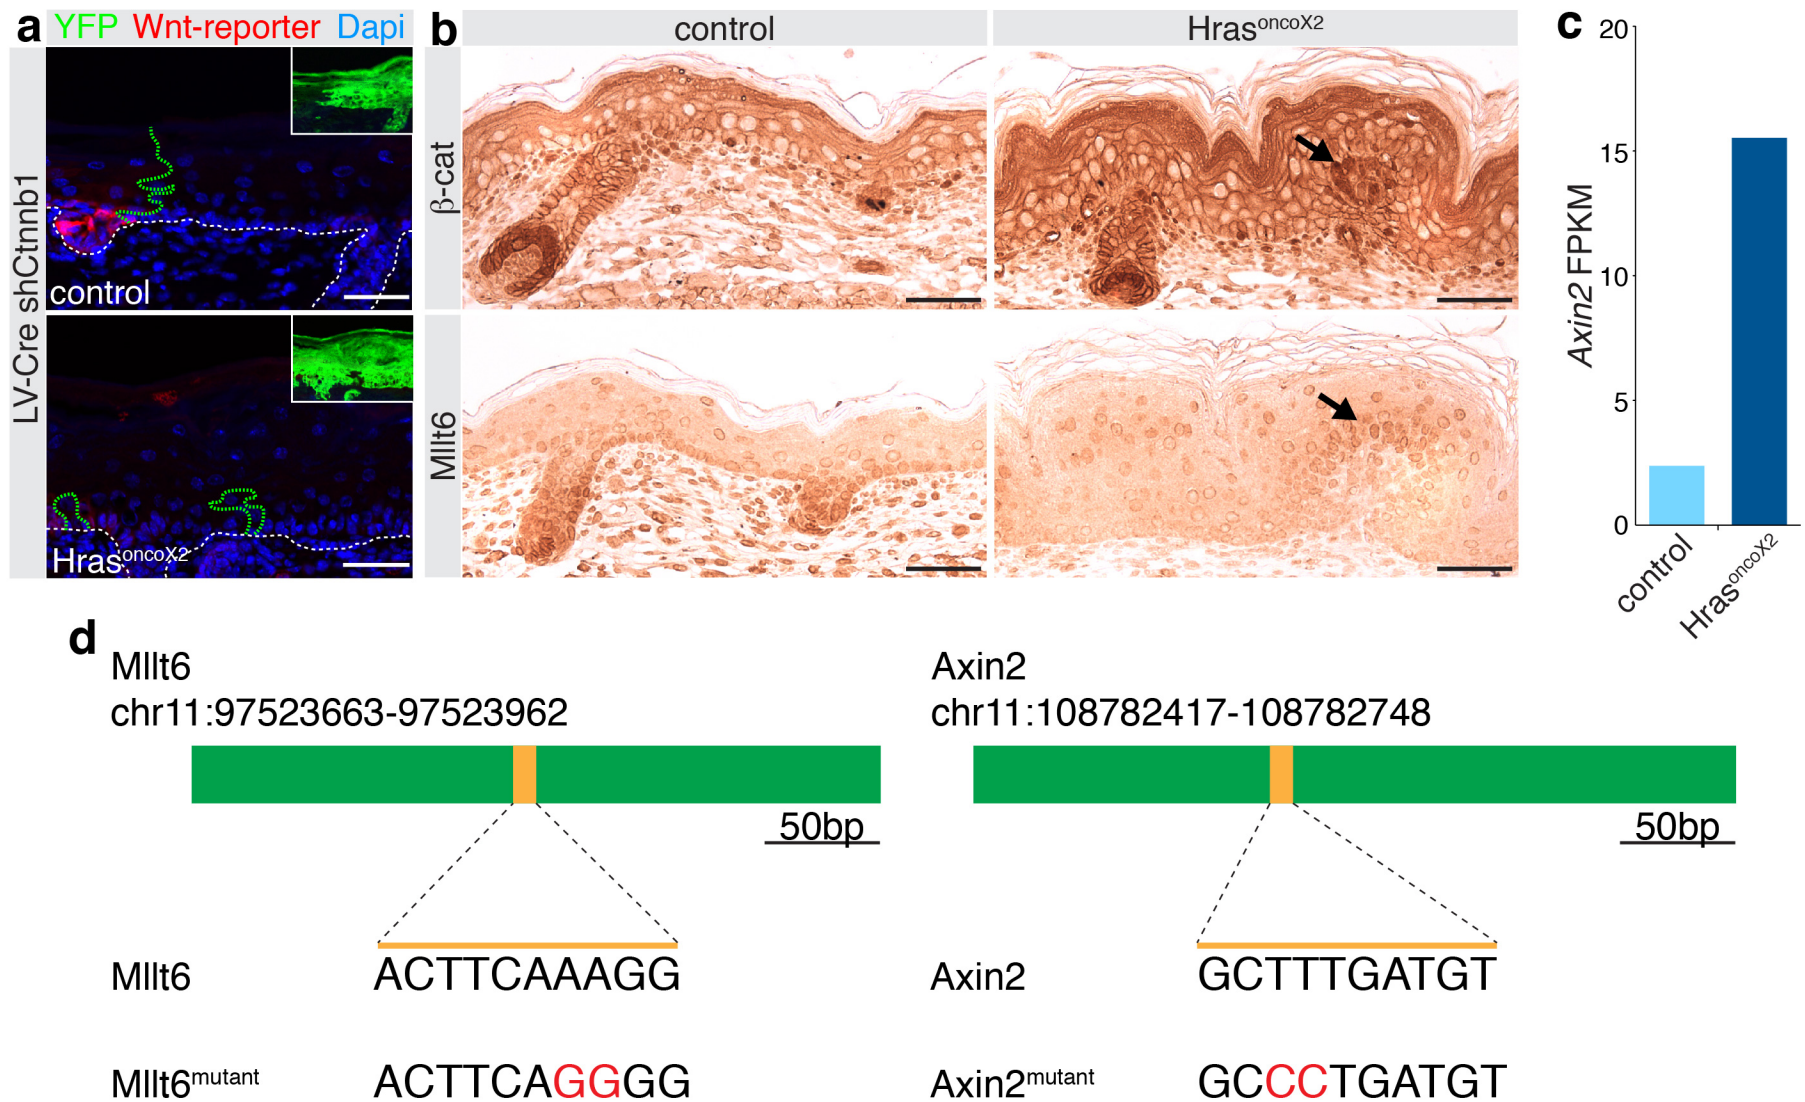

**Supplementary Figure 16. Hras<sup>G12V</sup> expression induces Wnt signaling in interfollicular epidermis.** **a**, Wnt-reporter activity is suppressed by shRNA depletion of  $\beta$ -catenin in control (top) and Hras<sup>G12V</sup> (bottom) animals. YFP (inset, in green) marks LV-Cre-transduced epidermis (to right of green dotted line in top; outside green-dotted lines in bottom). Dapi (blue) marks the nuclei. Dashed line demarcates epidermal-dermal interface. **b**,  $\beta$ -catenin and Mlt6 immunohistochemistry. Note nuclear  $\beta$ -catenin (top right) and Mlt6 accumulation (bottom right) in Hras<sup>oncoX2</sup> epidermal evaginations (arrows). **c**, *Axin2* transcript levels (FPKM: Fragments Per Kilobase of transcript per Million mapped reads) are significantly upregulated in the epidermis of Hras<sup>G12V</sup> animals. Values represent averages derived from RNA-Seq experiments, performed in duplicate. **d**, Genomic regions on Chromosome 11 where TCF3/4 binding sites upstream of *Mlt6* (left) and *Axin2* (right) were identified by CHIP-seq. Nucleotide substitutions (red) in the putative TCF3/4 binding motifs (yellow bar) of *Mlt6* and *Axin2* were generated to serve as negative controls (*Mlt6*<sup>mutant</sup> and *Axin2*<sup>mutant</sup>). Scale bars, 50  $\mu$ m.



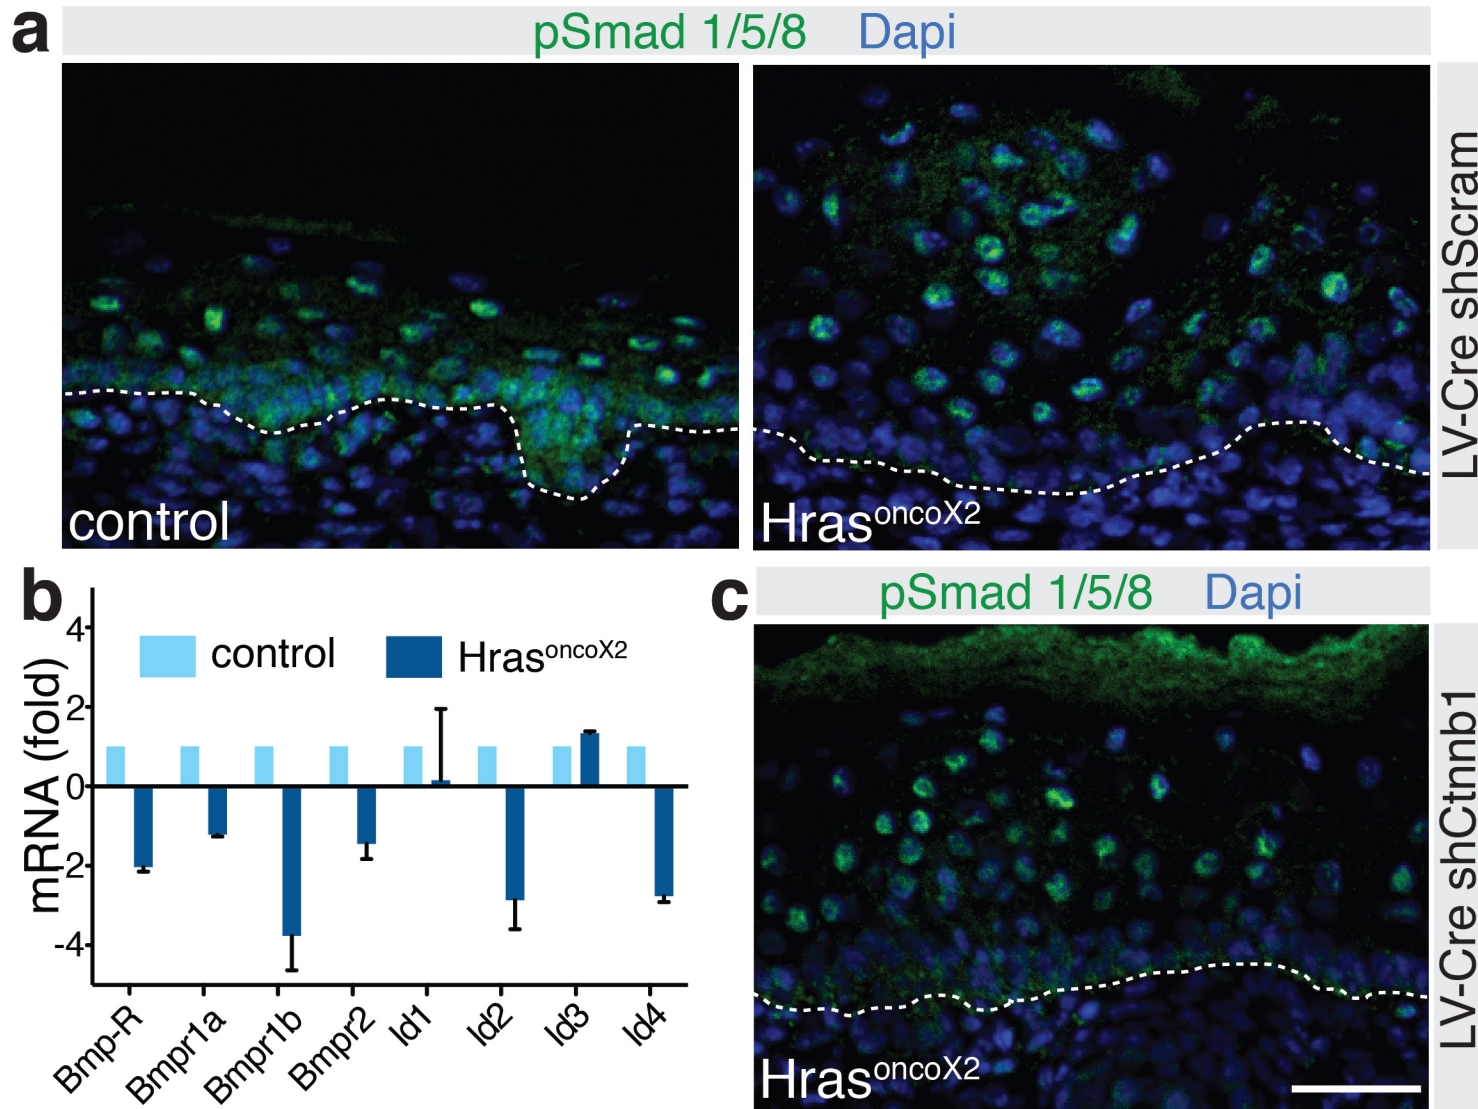

**Supplementary Figure 17. BMP signaling is diminished during Hras<sup>G12V</sup>-induced epidermal growth.** **a**, Nuclear localization of pSmad1/5/8 in the basal progenitor layer (left) is diminished in Hras<sup>oncoX2</sup> epidermis (right). **b**, mRNA levels of Bmp-reporter (Bmp-R) and downstream Bmp targets (Id2, Id4) are significantly reduced in Hras<sup>oncoX2</sup> epidermal progenitors. **c**, Nuclear localization of pSmad1/5/8 in the progenitor layer is not rescued by shRNA-mediated depletion of  $\beta$ -catenin. White dotted line demarcates dermal-epidermal boundary. Dapi (blue) labels nuclei. In real-time PCR experiment (**b**), data are shown for 3 embryos analyzed in two separate real-time reactions ( $n=6$ ), and error bars indicate s.e.m. Scale bar, 50  $\mu$ m.

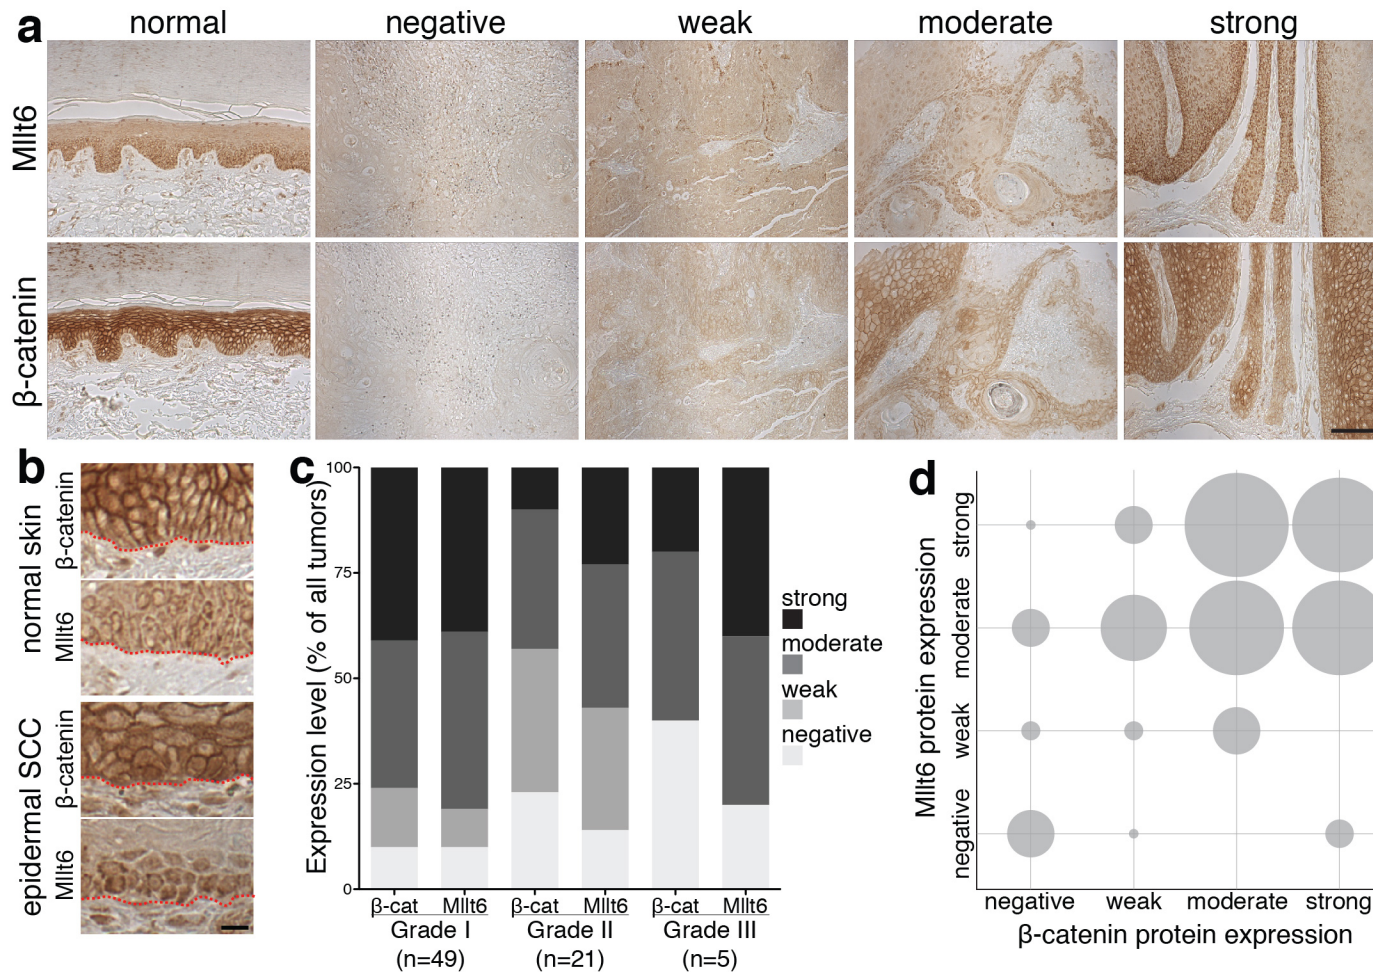

**Supplementary Figure 18. β-catenin and Mlt6 expression in human epidermal SCC.** **a**, A panel of human SCC samples was classified according to their expression of nuclear β-catenin and Mlt6, and included tumors where no signal was detected (negative), and where the signal was present at the levels <50% of the normal (weak), in the range of control expression (moderate), or at a level higher than in the control (strong). **b**, Nuclear localization of β-catenin and Mlt6 proteins is observed in epidermal cells that contact stroma in human SCC. Red dashed line marks the epidermal-dermal boundary. **c,d**, β-catenin and Mlt6 show parallel expression patterns in human SCCs (Spearman  $r=0.3018$  and  $P=0.0085$ ). The area of gray circles corresponds with the number of samples showing the trend. Scale bars, **(a)** 500 μm, **(b)** 50 μm.

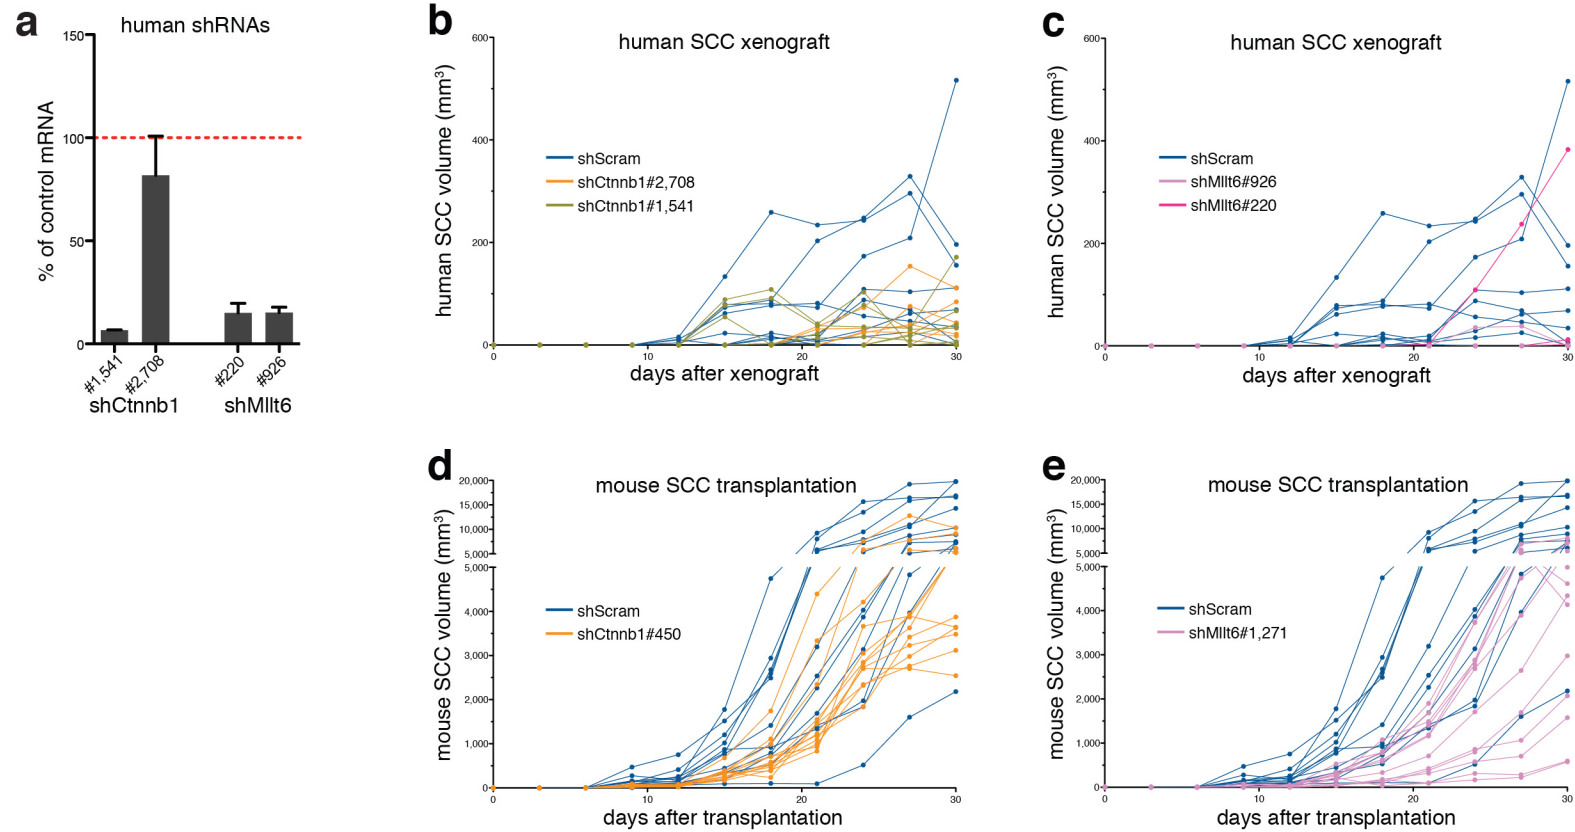

**Supplementary Figure 19. Depletion of  $\beta$ -catenin and Mllt6 results in significant SCC growth-retardation.** **a**, shRNAs against human *Ctnnb1* and *Mllt6* transcripts are efficient at depleting their target levels relative to control (red dashed line). **b,c**, SCCs growing from  $10^5$  xenographed human SCC cells transduced with control (shScram) or two independent test shCtnnb1 (**b**) and shMllt6 (**c**) hairpins are sensitive to depletion of their targets. **d,e**, SCCs growing from  $10^4$  transplanted mouse cancer stem cells show a similar dependence on  $\beta$ -catenin and Mllt6 for growth. Data in **b-e** report tumor size as an absolute value over time, and represent individual transplants with  $n=12$ . Error bars indicate s.d. In real-time PCR experiment (**a**), data represent three independently transduced cell cultures and two real-time reactions ( $n=6$ ).

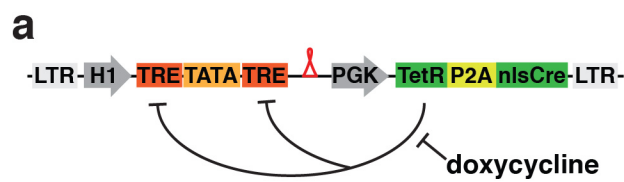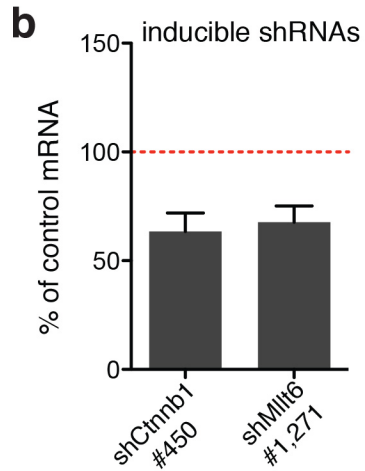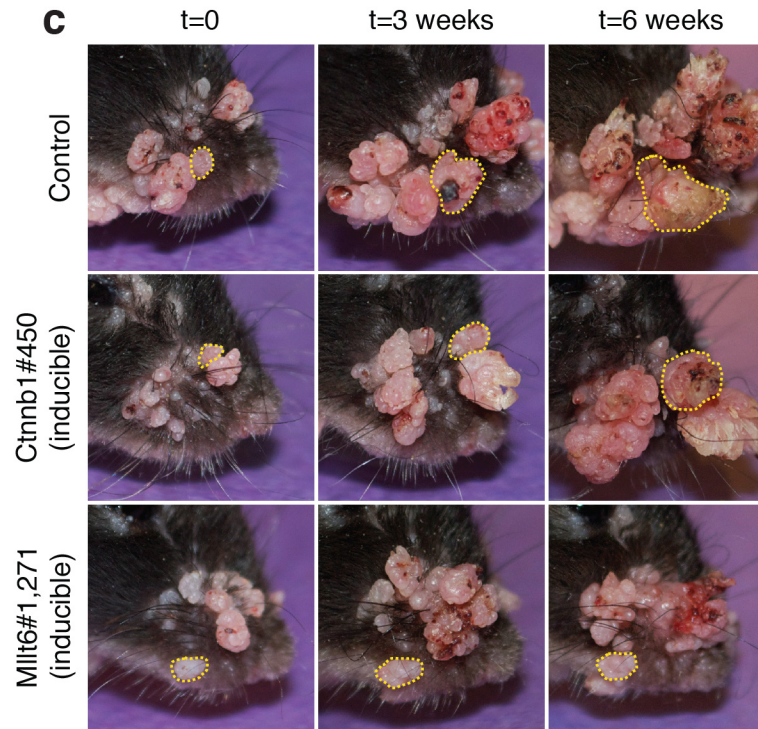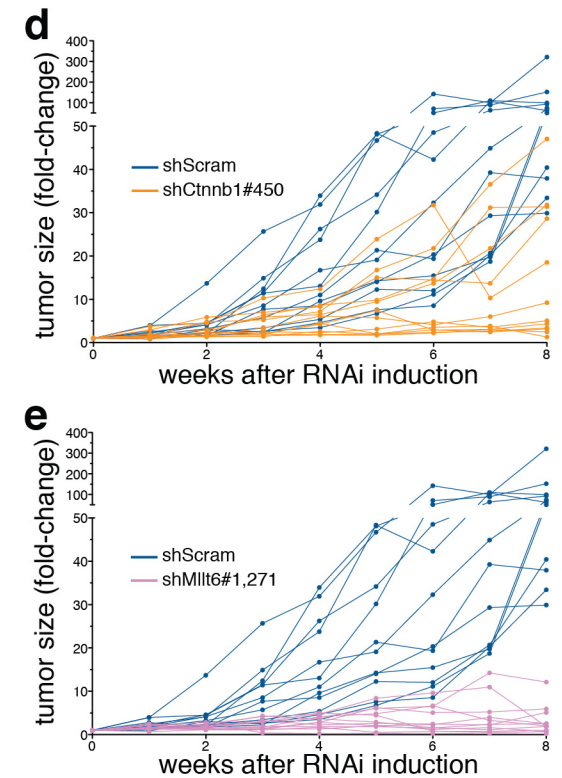

**Supplementary Figure 20.  $\beta$ -catenin and Mlt6 are essential for maintenance of Hras<sup>G12V</sup>-dependent tumors.** **a**, pLKO-Tet-On lentiviral construct allows for doxycycline regulated expression of shRNAs from an H1 promoter. In the absence of doxycycline, TetR, driven from a PGK promoter, represses shRNA expression by binding to the Tet responsive elements (TRE) flanking the TATA box. Addition of doxycycline removes the TetR-mediated repression and allows for shRNA expression and target knockdown. Note that TetR is linked to nlsCre through a self-cleaving P2A peptide, allowing for concomitant and constitutive expression of Cre-recombinase. **b**, Control *Ctnnb1* and *Mlt6* mRNA levels (red dashed line) are significantly depleted in tumors 8 weeks after doxycycline-mediated induction of shRNA knockdown. **c**, Examples of epidermal tumors induced by discrete Cre-mediated activation of Hras<sup>oncoX2</sup> expression. Initial administration of doxycycline (t=0) was made 60 days after oncogene activation, and continued for 8 weeks through doxycycline diet. Tumors are also shown at 3 and 6 weeks of inducible knockdown of *Ctnnb1* and *Mlt6*. Representative papillomas are outlined (yellow dashed line). **d,e**, Spontaneous epidermal tumors arising from discrete Hras<sup>oncoX2</sup> cells show reduction in growth rates following induction of shCtnnb1 (**d**) and shMlt6 (**e**) expression. Data in **d,e**, show tumor size over time as relative to their initial size (t=0), and represent individual tumors with n=12. Error bars indicate s.d. In real-time PCR experiment (**b**), data are shown for three tumors and two separate real-time reactions (n=6).

## Supplementary Table 1. Putative regulators of normal growth identified by DESeq test of biological replicates.

Note: Candidates identified by both DESeq and Fisher's exact test are highlighted in purple.

Candidates for positive regulators of normal growth (DESeq)

| Rank | entrez# | Gene Symbol   | Gene name                                                                                   | enriched shRNAs | depleted shRNAs | no change shRNAs | average Fold Change |
|------|---------|---------------|---------------------------------------------------------------------------------------------|-----------------|-----------------|------------------|---------------------|
| 1    | 67671   | Rpl38         | ribosomal protein L38                                                                       | 0               | 4               | 0                | -4.339221           |
| 2    | 16785   | Rpsa          | ribosomal protein SA                                                                        | 0               | 4               | 0                | -4.079998           |
| 3    | 20643   | Snrpe         | small nuclear ribonucleoprotein E                                                           | 0               | 4               | 0                | -3.810049           |
| 4    | 20088   | Rps24         | ribosomal protein S24                                                                       | 0               | 3               | 0                | -3.68909            |
| 5    | 19946   | Rpl30         | ribosomal protein L30                                                                       | 0               | 4               | 0                | -3.666467           |
| 6    | 53817   | Bat1a         | DEAD (Asp-Glu-Ala-Asp) box polypeptide 39B                                                  | 0               | 3               | 0                | -3.613878           |
| 7    | 268449  | Rpl23a        | ribosomal protein L23A                                                                      | 0               | 3               | 0                | -3.609205           |
| 8    | 66373   | Lsm5          | LSM5 homolog, U6 small nuclear RNA associated ( <i>S. cerevisiae</i> )                      | 0               | 3               | 0                | -3.41019            |
| 9    | 65019   | Rpl23         | ribosomal protein L23                                                                       | 0               | 3               | 0                | -3.373683           |
| 10   | 60411   | Cenpk         | centromere protein K                                                                        | 0               | 3               | 0                | -3.360687           |
| 11   | 75805   | Nln           | neurolysin (metallopeptidase M3 family)                                                     | 0               | 3               | 0                | -3.323194           |
| 12   | 113847  | V1ra5         | vomeronasal 1 receptor 43                                                                   | 0               | 3               | 0                | -3.310562           |
| 13   | 68436   | 1100001122Rik | ribosomal protein L34                                                                       | 0               | 4               | 0                | -3.238885           |
| 14   | 75062   | Sf3a3         | splicing factor 3a, subunit 3                                                               | 0               | 3               | 0                | -3.148655           |
| 15   | 64436   | Inpp5e        | inositol polyphosphate-5-phosphatase E                                                      | 0               | 3               | 0                | -3.141052           |
| 16   | 69786   | Tprkb         | Tp53rk binding protein                                                                      | 0               | 3               | 0                | -3.082626           |
| 17   | 110750  | Cse1l         | chromosome segregation 1-like ( <i>S. cerevisiae</i> )                                      | 0               | 4               | 0                | -3.068876           |
| 18   | 68052   | Rps13         | ribosomal protein S13                                                                       | 0               | 3               | 0                | -3.063958           |
| 19   | 18249   | Obp1a         | odorant binding protein 1a                                                                  | 0               | 3               | 0                | -3.030449           |
| 20   | 78070   | Cpt1c         | carnitine palmitoyltransferase 1c                                                           | 0               | 3               | 0                | -3.01639            |
| 21   | 81845   | Bat4          | G patch domain and ankyrin repeats 1                                                        | 0               | 3               | 0                | -2.996082           |
| 22   | 20091   | Rps3a         | ribosomal protein S3A                                                                       | 0               | 4               | 0                | -2.978607           |
| 23   | 22627   | Ywhae         | tyrosine 3-monooxygenase/tryptophan 5-monooxygenase activation protein, epsilon polypeptide | 0               | 3               | 0                | -2.963589           |
| 24   | 17463   | Psmc7         | proteasome (prosome, macropain) 26S subunit, non-ATPase, 7                                  | 0               | 3               | 0                | -2.949004           |
| 25   | 213469  | Lgi3          | leucine-rich repeat LGI family, member 3                                                    | 0               | 3               | 0                | -2.929412           |
| 26   | 12043   | Bcl2          | B cell leukemia/lymphoma 2                                                                  | 0               | 3               | 0                | -2.898144           |
| 27   | 21372   | Tbl1x         | transducin (beta)-like 1 X-linked                                                           | 0               | 3               | 0                | -2.897752           |
| 28   | 20102   | Rps4x         | ribosomal protein S4, X-linked                                                              | 0               | 5               | 0                | -2.894              |
| 29   | 217692  | Sipa11        | signal-induced proliferation-associated 1 like 1                                            | 0               | 3               | 0                | -2.878408           |
| 30   | 235184  | BC024479      | cDNA sequence BC024479                                                                      | 0               | 3               | 0                | -2.875646           |

## Candidates for positive regulators of normal growth (DESeq)

| Rank | entrez# | Gene Symbol   | Gene name                                                       | enriched shRNAs | depleted shRNAs | no change shRNAs | average Fold Change |
|------|---------|---------------|-----------------------------------------------------------------|-----------------|-----------------|------------------|---------------------|
| 31   | 104831  | Ptpn23        | protein tyrosine phosphatase, non-receptor type 23              | 0               | 3               | 0                | -2.874595           |
| 32   | 27370   | Rps26         | ribosomal protein S26                                           | 0               | 4               | 0                | -2.849476           |
| 33   | 20116   | Rps8          | ribosomal protein S8                                            | 0               | 4               | 0                | -2.816489           |
| 34   | 57267   | Apa3          | amyloid beta (A4) precursor protein-binding, family A, member 3 | 0               | 3               | 0                | -2.802923           |
| 35   | 27207   | Rps11         | ribosomal protein S11                                           | 0               | 3               | 0                | -2.783613           |
| 36   | 20103   | Rps5          | ribosomal protein S5                                            | 0               | 4               | 0                | -2.78067            |
| 37   | 19899   | Rpl18         | ribosomal protein L18                                           | 0               | 3               | 0                | -2.774511           |
| 38   | 71805   | Nup93         | nucleoporin 93                                                  | 0               | 3               | 0                | -2.773984           |
| 39   | 17096   | Lyn           | Yamaguchi sarcoma viral (v-yes-1) oncogene homolog              | 0               | 3               | 0                | -2.766454           |
| 40   | 19983   | Rpl5          | NA                                                              | 0               | 4               | 0                | -2.762295           |
| 41   | 17713   | Grpel1        | GrpE-like 1, mitochondrial                                      | 0               | 3               | 0                | -2.758901           |
| 42   | 12468   | Cct7          | chaperonin containing Tcp1, subunit 7 (eta)                     | 0               | 3               | 0                | -2.74743            |
| 43   | 208634  | Tspan10       | tetraspanin 10                                                  | 0               | 4               | 0                | -2.740088           |
| 44   | 66055   | 0610009D07Rik | RIKEN cDNA 0610009D07 gene                                      | 0               | 3               | 0                | -2.727277           |
| 45   | 66309   | Tmem128       | transmembrane protein 128                                       | 0               | 3               | 0                | -2.7246             |
| 46   | 16341   | Eif3s6        | eukaryotic translation initiation factor 3, subunit E           | 0               | 3               | 0                | -2.71133            |
| 47   | 17069   | Ly6e          | lymphocyte antigen 6 complex, locus E                           | 0               | 3               | 0                | -2.704518           |
| 48   | 233437  | F830104D24Rik | vomeronasal 2, receptor 66                                      | 0               | 3               | 0                | -2.695087           |
| 49   | 208643  | Eif4g1        | eukaryotic translation initiation factor 4, gamma 1             | 0               | 3               | 0                | -2.691456           |
| 50   | 50797   | Copb2         | coatamer protein complex, subunit beta 2 (beta prime)           | 0               | 4               | 0                | -2.686088           |
| 51   | 22700   | Zfp40         | zinc finger protein 40                                          | 0               | 3               | 0                | -2.680161           |
| 52   | 66878   | Riok3         | RIO kinase 3 (yeast)                                            | 0               | 3               | 0                | -2.668678           |
| 53   | 67097   | Rps10         | ribosomal protein S10                                           | 0               | 3               | 0                | -2.665608           |
| 54   | 66537   | 2510048O06Rik | proteasome maturation protein                                   | 0               | 3               | 0                | -2.659838           |
| 55   | 72843   | Prdm4         | PR domain containing 4                                          | 0               | 3               | 0                | -2.652077           |
| 56   | 107999  | Gtpbp6        | GTP binding protein 6 (putative)                                | 0               | 3               | 0                | -2.645169           |
| 57   | 16401   | Itga4         | integrin alpha 4                                                | 0               | 3               | 0                | -2.628811           |
| 58   | 27050   | Rps3          | ribosomal protein S3                                            | 0               | 5               | 0                | -2.620946           |
| 59   | 66489   | Rpl35         | ribosomal protein L35                                           | 0               | 3               | 0                | -2.612605           |
| 60   | 620654  | UNK           | NA                                                              | 0               | 3               | 0                | -2.606489           |
| 61   | 69354   | Slc38a4       | solute carrier family 38, member 4                              | 0               | 3               | 0                | -2.603837           |
| 62   | 20104   | Rps6          | ribosomal protein S6                                            | 0               | 4               | 0                | -2.602653           |
| 63   | 66711   | Sbds          | Shwachman-Bodian-Diamond syndrome homolog (human)               | 0               | 3               | 0                | -2.590301           |
| 64   | 67115   | Rpl14         | ribosomal protein L14                                           | 0               | 4               | 0                | -2.583297           |

## Candidates for positive regulators of normal growth (DESeq)

| Rank | entrez# | Gene Symbol   | Gene name                                                                    | enriched shRNAs | depleted shRNAs | no change shRNAs | average Fold Change |
|------|---------|---------------|------------------------------------------------------------------------------|-----------------|-----------------|------------------|---------------------|
| 65   | 109095  | Rbm15b        | RNA binding motif protein 15B                                                | 0               | 3               | 0                | -2.577491           |
| 66   | 110954  | Rpl10         | ribosomal protein 10                                                         | 0               | 3               | 0                | -2.572107           |
| 67   | 12464   | Cct4          | chaperonin containing Tcp1, subunit 4 (delta)                                | 0               | 4               | 0                | -2.563147           |
| 68   | 320106  | 9330158F14Rik | solute carrier family 38, member 11                                          | 0               | 3               | 0                | -2.557726           |
| 69   | 15497   | Hsd3b6        | hydroxy-delta-5-steroid dehydrogenase, 3 beta- and steroid delta-isomerase 6 | 0               | 4               | 0                | -2.552715           |
| 70   | 194456  | UNK           | NA                                                                           | 0               | 3               | 0                | -2.551336           |
| 71   | 68365   | Rab14         | RAB14, member RAS oncogene family                                            | 0               | 4               | 0                | -2.542897           |
| 72   | 22003   | Tpm1          | tropomyosin 1, alpha                                                         | 0               | 3               | 0                | -2.518739           |
| 73   | 17829   | Muc1          | mucin 1, transmembrane                                                       | 0               | 3               | 0                | -2.510883           |
| 74   | 320118  | Fbxl13        | F-box and leucine-rich repeat protein 13                                     | 0               | 3               | 0                | -2.509783           |
| 75   | 20379   | Sfrp4         | secreted frizzled-related protein 4                                          | 0               | 3               | 0                | -2.50256            |
| 76   | 76522   | Lsm8          | N(alpha)-acetyltransferase 38, NatC auxiliary subunit                        | 0               | 3               | 0                | -2.490629           |
| 77   | 114641  | Rpl31         | ribosomal protein L31                                                        | 0               | 3               | 0                | -2.476485           |
| 78   | 66085   | Eif3s5        | eukaryotic translation initiation factor 3, subunit F                        | 0               | 3               | 0                | -2.475468           |
| 79   | 378435  | Mafa          | v-maf musculoaponeurotic fibrosarcoma oncogene family, protein A (avian)     | 0               | 3               | 0                | -2.467841           |
| 80   | 81898   | Sf3b1         | splicing factor 3b, subunit 1                                                | 0               | 4               | 0                | -2.460782           |
| 81   | 19112   | Prlpc1        | prolactin family 8, subfamily a, member 6                                    | 0               | 3               | 0                | -2.449631           |
| 82   | 246103  | Atxn7         | ataxin 7                                                                     | 0               | 3               | 0                | -2.448723           |
| 83   | 70127   | Dpf3          | D4, zinc and double PHD fingers, family 3                                    | 0               | 3               | 0                | -2.446845           |
| 84   | 16363   | Irf2          | interferon regulatory factor 2                                               | 0               | 3               | 0                | -2.442872           |
| 85   | 270106  | Rpl13         | ribosomal protein L13                                                        | 0               | 3               | 0                | -2.442594           |
| 86   | 54127   | Rps28         | ribosomal protein S28                                                        | 0               | 3               | 0                | -2.435125           |
| 87   | 67186   | Rplp2         | ribosomal protein, large P2                                                  | 0               | 3               | 0                | -2.43432            |
| 88   | 214253  | Etnk2         | ethanolamine kinase 2                                                        | 0               | 4               | 0                | -2.425197           |
| 89   | 12015   | Bad           | BCL2-associated agonist of cell death                                        | 0               | 3               | 0                | -2.424971           |
| 90   | 106582  | Nrm           | nurim (nuclear envelope membrane protein)                                    | 0               | 3               | 0                | -2.420306           |
| 91   | 192986  | Cyb5d2        | cytochrome b5 domain containing 2                                            | 0               | 3               | 0                | -2.416131           |
| 92   | 210126  | Lpp           | LIM domain containing preferred translocation partner in lipoma              | 0               | 4               | 0                | -2.409133           |
| 93   | 433297  | LOC433297     | myosin, light polypeptide 6, alkali, smooth muscle and non-muscle pseudogene | 0               | 3               | 0                | -2.40878            |
| 94   | 67332   | Snrpd3        | small nuclear ribonucleoprotein D3                                           | 0               | 3               | 0                | -2.408524           |
| 95   | 17246   | Mdm2          | transformed mouse 3T3 cell double minute 2                                   | 0               | 3               | 0                | -2.408074           |
| 96   | 72112   | Ppp1r14d      | protein phosphatase 1, regulatory (inhibitor) subunit 14D                    | 0               | 3               | 0                | -2.39796            |
| 97   | 18146   | Npdc1         | neural proliferation, differentiation and control gene 1                     | 0               | 3               | 0                | -2.393931           |
| 98   | 21346   | Tagln2        | transgelin 2                                                                 | 0               | 3               | 0                | -2.391755           |

## Candidates for positive regulators of normal growth (DESeq)

| Rank | entrez# | Gene Symbol   | Gene name                                                              | enriched shRNAs | depleted shRNAs | no change shRNAs | average Fold Change |
|------|---------|---------------|------------------------------------------------------------------------|-----------------|-----------------|------------------|---------------------|
| 99   | 12466   | Cct6a         | chaperonin containing Tcp1, subunit 6a (zeta)                          | 0               | 4               | 0                | -2.389838           |
| 100  | 93670   | Tac4          | tachykinin 4                                                           | 0               | 3               | 0                | -2.385428           |
| 101  | 20068   | Rps17         | ribosomal protein S17                                                  | 0               | 4               | 0                | -2.379258           |
| 102  | 15013   | H2-Q2         | histocompatibility 2, Q region locus 2                                 | 0               | 4               | 0                | -2.378056           |
| 103  | 57780   | Fxyd7         | FXYP domain-containing ion transport regulator 7                       | 0               | 3               | 0                | -2.374736           |
| 104  | 278097  | Armxc6        | armadillo repeat containing, X-linked 6                                | 0               | 3               | 0                | -2.374356           |
| 105  | 67168   | P2ry5         | lysophosphatidic acid receptor 6                                       | 0               | 3               | 0                | -2.374344           |
| 106  | 21681   | Thoc4         | Aly/REF export factor                                                  | 0               | 3               | 0                | -2.372914           |
| 107  | 107767  | Scamp1        | secretory carrier membrane protein 1                                   | 0               | 3               | 0                | -2.371455           |
| 108  | 21946   | Pglyrp1       | peptidoglycan recognition protein 1                                    | 0               | 3               | 0                | -2.370492           |
| 109  | 113857  | V1rb9         | vomer nasal 1 receptor 41                                              | 0               | 3               | 0                | -2.366996           |
| 110  | 171258  | V1ri7         | vomer nasal 1 receptor 202                                             | 0               | 3               | 0                | -2.366009           |
| 111  | 433285  | UNK           | NA                                                                     | 0               | 3               | 0                | -2.358734           |
| 112  | 53382   | Txn1          | thioredoxin-like 1                                                     | 0               | 3               | 0                | -2.336602           |
| 113  | 20630   | Snrp1c        | U1 small nuclear ribonucleoprotein C                                   | 0               | 3               | 0                | -2.336013           |
| 114  | 74589   | 4933428M03Rik | kelch repeat and BTB (POZ) domain containing 12                        | 0               | 3               | 0                | -2.3327             |
| 115  | 67143   | Zfpn1a5       | IKAROS family zinc finger 5                                            | 0               | 3               | 0                | -2.321429           |
| 116  | 12753   | Clock         | circadian locomotor output cycles kaput                                | 0               | 3               | 0                | -2.31908            |
| 117  | 435766  | Tnni3k        | TNNI3 interacting kinase                                               | 0               | 3               | 0                | -2.31581            |
| 118  | 114895  | UNK           | NA                                                                     | 0               | 3               | 0                | -2.314364           |
| 119  | 19671   | Rce1          | RCE1 homolog, prenyl protein peptidase ( <i>S. cerevisiae</i> )        | 0               | 3               | 0                | -2.31051            |
| 120  | 67678   | Lsm3          | LSM3 homolog, U6 small nuclear RNA associated ( <i>S. cerevisiae</i> ) | 0               | 4               | 0                | -2.310446           |
| 121  | 76499   | Clasp2        | CLIP associating protein 2                                             | 0               | 3               | 0                | -2.307653           |
| 122  | 241134  | 9430031J16Rik | RIKEN cDNA 9430031J16 gene                                             | 0               | 3               | 0                | -2.306393           |
| 123  | 19989   | Rpl7          | ribosomal protein L7                                                   | 0               | 4               | 0                | -2.303568           |
| 124  | 20005   | Rpl9          | ribosomal protein L9                                                   | 0               | 3               | 0                | -2.30269            |
| 125  | 56194   | Prpf40a       | PRP40 pre-mRNA processing factor 40 homolog A (yeast)                  | 0               | 4               | 0                | -2.299517           |
| 126  | 104130  | Ndufb11       | NADH dehydrogenase (ubiquinone) 1 beta subcomplex, 11                  | 0               | 3               | 0                | -2.296626           |
| 127  | 245663  | LOC245663     | prohibitin pseudogene                                                  | 0               | 4               | 0                | -2.289553           |
| 128  | 66475   | Rps23         | ribosomal protein S23                                                  | 0               | 4               | 0                | -2.283045           |
| 129  | 245866  | lft52         | intraflagellar transport 52 homolog ( <i>Chlamydomonas</i> )           | 0               | 3               | 0                | -2.28257            |
| 130  | 12458   | Ccr6          | chemokine (C-C motif) receptor 6                                       | 0               | 3               | 0                | -2.279072           |
| 131  | 11837   | Arbp          | ribosomal protein, large, P0                                           | 0               | 4               | 0                | -2.275991           |
| 132  | 20637   | Snrp70        | small nuclear ribonucleoprotein 70 (U1)                                | 0               | 3               | 0                | -2.272878           |



Candidates for positive regulators of normal growth (DESeq)

| Rank | entrez# | Gene Symbol   | Gene name                                                                                        | enriched shRNAs | depleted shRNAs | no change shRNAs | average Fold Change |
|------|---------|---------------|--------------------------------------------------------------------------------------------------|-----------------|-----------------|------------------|---------------------|
| 133  | 15891   | lbsp          | integrin binding sialoprotein                                                                    | 0               | 3               | 0                | -2.271915           |
| 134  | 403200  | 4930504O13Rik | RIKEN cDNA 4930504O13 gene                                                                       | 0               | 3               | 0                | -2.270211           |
| 135  | 22601   | Yap1          | yes-associated protein 1                                                                         | 0               | 4               | 0                | -2.262612           |
| 136  | 432986  | Kb16p         | type II keratin Kb16P                                                                            | 0               | 4               | 0                | -2.259583           |
| 137  | 78908   | Igsf3         | immunoglobulin superfamily, member 3                                                             | 0               | 3               | 0                | -2.258492           |
| 138  | 11787   | Apbp2         | amyloid beta (A4) precursor protein-binding, family B, member 2                                  | 0               | 3               | 0                | -2.257702           |
| 139  | 98970   | Fibcd1        | fibrinogen C domain containing 1                                                                 | 0               | 5               | 0                | -2.256076           |
| 140  | 12317   | Calr          | calreticulin                                                                                     | 0               | 4               | 0                | -2.255337           |
| 141  | 66882   | Bzw1          | basic leucine zipper and W2 domains 1                                                            | 0               | 3               | 0                | -2.245709           |
| 142  | 14113   | Fbl           | fibrillarlin                                                                                     | 0               | 3               | 0                | -2.244987           |
| 143  | 68468   | Ly6g6c        | lymphocyte antigen 6 complex, locus G6C                                                          | 0               | 3               | 0                | -2.23909            |
| 144  | 216616  | Efemp1        | epidermal growth factor-containing fibulin-like extracellular matrix protein 1                   | 0               | 3               | 0                | -2.23812            |
| 145  | 68479   | Phf5a         | PHD finger protein 5A                                                                            | 0               | 3               | 0                | -2.230631           |
| 146  | 54217   | Rpl36         | ribosomal protein L36                                                                            | 0               | 3               | 0                | -2.229974           |
| 147  | 69787   | Anxa13        | annexin A13                                                                                      | 0               | 4               | 0                | -2.226859           |
| 148  | 67891   | Rpl4          | ribosomal protein L4                                                                             | 0               | 3               | 0                | -2.226255           |
| 149  | 21689   | Tekt1         | tektin 1                                                                                         | 0               | 3               | 0                | -2.223372           |
| 150  | 15229   | Foxd1         | forkhead box D1                                                                                  | 0               | 3               | 0                | -2.222823           |
| 151  | 230103  | Npr2          | natriuretic peptide receptor 2                                                                   | 0               | 4               | 0                | -2.220004           |
| 152  | 20085   | Rps19         | ribosomal protein S19                                                                            | 0               | 3               | 0                | -2.208389           |
| 153  | 74653   | 4930444A02Rik | RIKEN cDNA 4930444A02 gene                                                                       | 0               | 3               | 0                | -2.207932           |
| 154  | 68770   | Phtf2         | putative homeodomain transcription factor 2                                                      | 0               | 3               | 0                | -2.207409           |
| 155  | 18632   | Pex11b        | peroxisomal biogenesis factor 11 beta                                                            | 0               | 3               | 0                | -2.205925           |
| 156  | 56018   | Stard10       | START domain containing 10                                                                       | 0               | 4               | 0                | -2.205127           |
| 157  | 209318  | Gps1          | G protein pathway suppressor 1                                                                   | 0               | 3               | 0                | -2.203966           |
| 158  | 26445   | Psmb2         | proteasome (prosome, macropain) subunit, beta type 2                                             | 0               | 4               | 0                | -2.203463           |
| 159  | 27362   | Dnajb9        | DnaJ (Hsp40) homolog, subfamily B, member 9                                                      | 0               | 3               | 0                | -2.19876            |
| 160  | 72308   | Brf1          | BRF1 homolog, subunit of RNA polymerase III transcription initiation factor IIIB (S. cerevisiae) | 0               | 3               | 0                | -2.192492           |
| 161  | 14651   | Hagh          | hydroxyacyl glutathione hydrolase                                                                | 0               | 3               | 0                | -2.191247           |
| 162  | 53319   | Nxf1          | nuclear RNA export factor 1 homolog (S. cerevisiae)                                              | 0               | 3               | 0                | -2.18956            |
| 163  | 110809  | Sfrs1         | serine/arginine-rich splicing factor 1                                                           | 0               | 3               | 0                | -2.183404           |
| 164  | 109754  | Cyb5r3        | cytochrome b5 reductase 3                                                                        | 0               | 3               | 0                | -2.175758           |
| 165  | 17749   | Polr2k        | polymerase (RNA) II (DNA directed) polypeptide K                                                 | 0               | 3               | 0                | -2.175589           |
| 166  | 14626   | Gk2           | glycerol kinase 2                                                                                | 0               | 3               | 0                | -2.174739           |

## Candidates for positive regulators of normal growth (DESeq)

| Rank | entrez# | Gene Symbol   | Gene name                                                     | enriched shRNAs | depleted shRNAs | no change shRNAs | average Fold Change |
|------|---------|---------------|---------------------------------------------------------------|-----------------|-----------------|------------------|---------------------|
| 167  | 268395  | Mpg           | N-methylpurine-DNA glycosylase                                | 0               | 3               | 0                | -2.170713           |
| 168  | 13226   | Defcr-rs7     | defensin, alpha, related sequence 7                           | 0               | 3               | 0                | -2.166744           |
| 169  | 71446   | Wrb           | tryptophan rich basic protein                                 | 0               | 3               | 0                | -2.162425           |
| 170  | 13164   | Dazl          | deleted in azoospermia-like                                   | 0               | 3               | 0                | -2.161805           |
| 171  | 14944   | Gzmg          | granzyme G                                                    | 0               | 3               | 0                | -2.16084            |
| 172  | 329302  | UNK           | NA                                                            | 0               | 3               | 0                | -2.159104           |
| 173  | 72780   | Rspo3         | R-spondin 3 homolog ( <i>Xenopus laevis</i> )                 | 0               | 3               | 0                | -2.154918           |
| 174  | 16783   | Lamp1         | lysosomal-associated membrane protein 1                       | 0               | 4               | 0                | -2.152228           |
| 175  | 244144  | Usp35         | ubiquitin specific peptidase 35                               | 0               | 3               | 0                | -2.14748            |
| 176  | 66665   | 5730528L13Rik | RIKEN cDNA 5730528L13 gene                                    | 0               | 3               | 0                | -2.146389           |
| 177  | 75627   | Snopc1        | small nuclear RNA activating complex, polypeptide 1           | 0               | 4               | 0                | -2.146325           |
| 178  | 384361  | UNK           | NA                                                            | 0               | 4               | 0                | -2.145862           |
| 179  | 381511  | Ppm2c         | pyruvate dehydrogenase phosphatase catalytic subunit 1        | 0               | 3               | 0                | -2.145784           |
| 180  | 67661   | Ift172        | intraflagellar transport 172 homolog ( <i>Chlamydomonas</i> ) | 0               | 3               | 0                | -2.141744           |
| 181  | 20044   | Rps14         | ribosomal protein S14                                         | 0               | 3               | 0                | -2.137683           |
| 182  | 20020   | Polr2a        | polymerase (RNA) II (DNA directed) polypeptide A              | 0               | 3               | 0                | -2.136608           |
| 183  | 22139   | Ttr           | transthyretin                                                 | 0               | 3               | 0                | -2.135728           |
| 184  | 67236   | 2810452K22Rik | cyclin-dependent kinase 2 interacting protein                 | 0               | 3               | 0                | -2.135489           |
| 185  | 60365   | Rbm8a         | RNA binding motif protein 8a                                  | 0               | 3               | 0                | -2.134922           |
| 186  | 258904  | Olf1221       | olfactory receptor 1221                                       | 0               | 3               | 0                | -2.134388           |
| 187  | 78294   | Rps27a        | ribosomal protein S27A                                        | 0               | 4               | 0                | -2.132393           |
| 188  | 73353   | Actr2         | actin-related protein T2                                      | 0               | 4               | 0                | -2.131837           |
| 189  | 83679   | Pde4dip       | phosphodiesterase 4D interacting protein (myomegalin)         | 0               | 3               | 0                | -2.128432           |
| 190  | 14394   | Gabra1        | gamma-aminobutyric acid (GABA) A receptor, subunit alpha 1    | 0               | 3               | 0                | -2.124248           |
| 191  | 18740   | Pitx1         | paired-like homeodomain transcription factor 1                | 0               | 3               | 0                | -2.124128           |
| 192  | 12425   | Cckar         | cholecystokinin A receptor                                    | 0               | 3               | 0                | -2.1236             |
| 193  | 93691   | Klf7          | Kruppel-like factor 7 (ubiquitous)                            | 0               | 3               | 0                | -2.121214           |
| 194  | 12575   | Cdkn1a        | cyclin-dependent kinase inhibitor 1A (P21)                    | 0               | 3               | 0                | -2.116542           |
| 195  | 227683  | Coq4          | coenzyme Q4 homolog (yeast)                                   | 0               | 3               | 0                | -2.116473           |
| 196  | 81879   | Tcfcp2l1      | transcription factor CP2-like 1                               | 0               | 3               | 0                | -2.11165            |
| 197  | 384639  | LOC384639     | tetraspanin 7 pseudogene                                      | 0               | 3               | 0                | -2.11125            |
| 198  | 66492   | Zmat2         | zinc finger, matrin type 2                                    | 0               | 4               | 0                | -2.101759           |
| 199  | 72085   | Osgpl1        | O-sialoglycoprotein endopeptidase-like 1                      | 0               | 3               | 0                | -2.100954           |
| 200  | 109552  | Sri           | sorcin                                                        | 0               | 3               | 0                | -2.099236           |

## Candidates for positive regulators of normal growth (DESeq)

| Rank | entrez# | Gene Symbol   | Gene name                                                                                                     | enriched shRNAs | depleted shRNAs | no change shRNAs | average Fold Change |
|------|---------|---------------|---------------------------------------------------------------------------------------------------------------|-----------------|-----------------|------------------|---------------------|
| 201  | 14028   | Evx1          | even skipped homeotic gene 1 homolog                                                                          | 0               | 3               | 0                | -2.098211           |
| 202  | 17975   | Ncl           | nucleolin                                                                                                     | 0               | 5               | 0                | -2.094065           |
| 203  | 14705   | Bscl2         | Bernardinelli-Seip congenital lipodystrophy 2 homolog (human)                                                 | 0               | 3               | 0                | -2.090752           |
| 204  | 51960   | Kctd18        | potassium channel tetramerisation domain containing 18                                                        | 0               | 3               | 0                | -2.08915            |
| 205  | 19933   | Rpl21         | ribosomal protein L21                                                                                         | 0               | 4               | 0                | -2.089087           |
| 206  | 54713   | Zfp312        | Fez family zinc finger 2                                                                                      | 0               | 3               | 0                | -2.084881           |
| 207  | 319322  | Sf3b2         | splicing factor 3b, subunit 2                                                                                 | 0               | 3               | 0                | -2.083558           |
| 208  | 101023  | Zfp513        | zinc finger protein 513                                                                                       | 0               | 3               | 0                | -2.082396           |
| 209  | 14913   | Guca1a        | guanylate cyclase activator 1a (retina)                                                                       | 0               | 3               | 0                | -2.076792           |
| 210  | 19951   | Rpl32         | ribosomal protein L32                                                                                         | 0               | 3               | 0                | -2.075773           |
| 211  | 20448   | St6galnac4    | ST6 (alpha-N-acetyl-neuraminyl-2,3-beta-galactosyl-1,3)-N-acetylgalactosaminide alpha-2,6-sialyltransferase 4 | 0               | 4               | 0                | -2.071198           |
| 212  | 83965   | Enpp5         | ectonucleotide pyrophosphatase/phosphodiesterase 5                                                            | 0               | 3               | 0                | -2.063434           |
| 213  | 15223   | Foxj1         | forkhead box J1                                                                                               | 0               | 3               | 0                | -2.05773            |
| 214  | 78304   | Lsmd1         | LSM domain containing 1                                                                                       | 0               | 3               | 0                | -2.054105           |
| 215  | 20899   | Stra8         | stimulated by retinoic acid gene 8                                                                            | 0               | 3               | 0                | -2.047656           |
| 216  | 15039   | H2-T22        | histocompatibility 2, T region locus 22                                                                       | 0               | 3               | 0                | -2.04332            |
| 217  | 19981   | Rpl37a        | ribosomal protein L37a                                                                                        | 0               | 3               | 0                | -2.039922           |
| 218  | 258927  | Olf481        | olfactory receptor 481                                                                                        | 0               | 3               | 0                | -2.034612           |
| 219  | 13406   | Dmp1          | dentin matrix protein 1                                                                                       | 0               | 4               | 0                | -2.027262           |
| 220  | 18012   | Neurod1       | neurogenic differentiation 1                                                                                  | 0               | 3               | 0                | -2.008923           |
| 221  | 107508  | Eprs          | glutamyl-prolyl-tRNA synthetase                                                                               | 0               | 3               | 0                | -2.002513           |
| 222  | 28077   | D13Wsu50e     | mediator of RNA polymerase II transcription, subunit 10 homolog (NUT2, S. cerevisiae)                         | 0               | 3               | 0                | -2.000825           |
| 223  | 20658   | Son           | Son DNA binding protein                                                                                       | 0               | 3               | 0                | -1.997952           |
| 224  | 240066  | BC066107      | zinc finger protein 870                                                                                       | 0               | 3               | 0                | -1.997125           |
| 225  | 64435   | Fcamr         | Fc receptor, IgA, IgM, high affinity                                                                          | 0               | 3               | 0                | -1.995491           |
| 226  | 320435  | 5830482F20Rik | Ras and Rab interactor-like                                                                                   | 0               | 3               | 0                | -1.99443            |
| 227  | 66506   | 1810042K04Rik | proteasome (prosome, macropain) assembly chaperone 3                                                          | 0               | 3               | 0                | -1.993025           |
| 228  | 243382  | Ppm1k         | protein phosphatase 1K (PP2C domain containing)                                                               | 0               | 4               | 0                | -1.99278            |
| 229  | 73182   | 3110045G13Rik | platelet endothelial aggregation receptor 1                                                                   | 0               | 3               | 0                | -1.991089           |
| 230  | 14148   | Fdx1          | ferredoxin 1                                                                                                  | 0               | 3               | 0                | -1.990299           |
| 231  | 403183  | 4832428D23Rik | RIKEN cDNA 4832428D23 gene                                                                                    | 0               | 3               | 0                | -1.988978           |
| 232  | 19378   | Aldh1a2       | aldehyde dehydrogenase family 1, subfamily A2                                                                 | 0               | 3               | 0                | -1.987671           |
| 233  | 20319   | Sfrp2         | secreted frizzled-related protein 2                                                                           | 0               | 3               | 0                | -1.982702           |
| 234  | 98363   | Efh1          | EF hand domain containing 1                                                                                   | 0               | 3               | 0                | -1.979772           |

## Candidates for positive regulators of normal growth (DESeq)

| Rank | entrez# | Gene Symbol   | Gene name                                                                          | enriched shRNAs | depleted shRNAs | no change shRNAs | average Fold Change |
|------|---------|---------------|------------------------------------------------------------------------------------|-----------------|-----------------|------------------|---------------------|
| 235  | 12396   | Cbfa2t2h      | core-binding factor, runt domain, alpha subunit 2, translocated to, 2 (human)      | 0               | 3               | 0                | -1.975358           |
| 236  | 67932   | 1700129C05Rik | RIKEN cDNA 1700129C05 gene                                                         | 0               | 3               | 0                | -1.97245            |
| 237  | 218100  | Zfp322a       | zinc finger protein 322A                                                           | 0               | 3               | 0                | -1.970895           |
| 238  | 103583  | Fbxw11        | F-box and WD-40 domain protein 11                                                  | 0               | 3               | 0                | -1.96888            |
| 239  | 12062   | Bdkrb2        | bradykinin receptor, beta 2                                                        | 0               | 4               | 0                | -1.968079           |
| 240  | 380601  | C78212        | FAST kinase domains 5                                                              | 0               | 3               | 0                | -1.960673           |
| 241  | 69032   | Lyzl4         | lysozyme-like 4                                                                    | 0               | 3               | 0                | -1.953294           |
| 242  | 12346   | Car1          | carbonic anhydrase 1                                                               | 0               | 3               | 0                | -1.95096            |
| 243  | 319195  | Rpl17         | ribosomal protein L17                                                              | 0               | 3               | 0                | -1.950051           |
| 244  | 56447   | Copz1         | coatamer protein complex, subunit zeta 1                                           | 0               | 3               | 0                | -1.94875            |
| 245  | 19356   | Rad17         | RAD17 homolog (S. pombe)                                                           | 0               | 3               | 0                | -1.947939           |
| 246  | 268294  | Zbtb24        | zinc finger and BTB domain containing 24                                           | 0               | 3               | 0                | -1.94773            |
| 247  | 14787   | Rhpn1         | rhophilin, Rho GTPase binding protein 1                                            | 0               | 3               | 0                | -1.944858           |
| 248  | 15504   | Dnajb3        | DnaJ (Hsp40) homolog, subfamily B, member 3                                        | 0               | 3               | 0                | -1.935472           |
| 249  | 233489  | Picalm        | phosphatidylinositol binding clathrin assembly protein                             | 0               | 4               | 0                | -1.93358            |
| 250  | 74747   | Ddit4         | DNA-damage-inducible transcript 4                                                  | 0               | 3               | 0                | -1.932743           |
| 251  | 170736  | Parvb         | parvin, beta                                                                       | 0               | 3               | 0                | -1.928655           |
| 252  | 50770   | Atp11a        | ATPase, class VI, type 11A                                                         | 0               | 3               | 0                | -1.92121            |
| 253  | 239151  | Gm600         | NA                                                                                 | 0               | 3               | 0                | -1.920541           |
| 254  | 80859   | Nfkbiz        | nuclear factor of kappa light polypeptide gene enhancer in B cells inhibitor, zeta | 0               | 3               | 0                | -1.919689           |
| 255  | 12372   | Casq1         | calsequestrin 1                                                                    | 0               | 3               | 0                | -1.915447           |
| 256  | 68221   | 1700049M11Rik | WAP four-disulfide core domain 15A                                                 | 0               | 3               | 0                | -1.912978           |
| 257  | 11606   | Agt           | angiotensinogen (serpin peptidase inhibitor, clade A, member 8)                    | 0               | 3               | 0                | -1.912162           |
| 258  | 380839  | Serpib1c      | serine (or cysteine) peptidase inhibitor, clade B, member 1c                       | 0               | 3               | 0                | -1.910636           |
| 259  | 230991  | B930041F14Rik | RIKEN cDNA B930041F14 gene                                                         | 0               | 3               | 0                | -1.903894           |
| 260  | 70676   | Gulp1         | GULP, engulfment adaptor PTB domain containing 1                                   | 0               | 3               | 0                | -1.903221           |
| 261  | 67126   | Atp5e         | ATP synthase, H+ transporting, mitochondrial F1 complex, epsilon subunit           | 0               | 3               | 0                | -1.902026           |
| 262  | 435287  | UNK           | NA                                                                                 | 0               | 3               | 0                | -1.901343           |
| 263  | 11568   | Aebp1         | AE binding protein 1                                                               | 0               | 3               | 0                | -1.899558           |
| 264  | 67344   | Tctex1d1      | Tctex1 domain containing 1                                                         | 0               | 3               | 0                | -1.892519           |
| 265  | 259011  | Olfir389      | olfactory receptor 389                                                             | 0               | 4               | 0                | -1.891594           |
| 266  | 140489  | Bhlhb4        | basic helix-loop-helix family, member e23                                          | 0               | 3               | 0                | -1.891407           |
| 267  | 18103   | Nme2          | non-metastatic cells 2, protein (NM23B) expressed in                               | 0               | 5               | 0                | -1.888298           |
| 268  | 30853   | Mlf2          | myeloid leukemia factor 2                                                          | 0               | 3               | 0                | -1.887994           |

Candidates for positive regulators of normal growth (DESeq)

| Rank | entrez# | Gene Symbol   | Gene name                                                             | enriched shRNAs | depleted shRNAs | no change shRNAs | average Fold Change |
|------|---------|---------------|-----------------------------------------------------------------------|-----------------|-----------------|------------------|---------------------|
| 269  | 209225  | Zfp710        | zinc finger protein 710                                               | 0               | 3               | 0                | -1.883288           |
| 270  | 103142  | Rdh9          | retinol dehydrogenase 9                                               | 0               | 3               | 0                | -1.880657           |
| 271  | 320995  | Rfxdc1        | regulatory factor X, 6                                                | 0               | 3               | 0                | -1.876787           |
| 272  | 93673   | Cml2          | camello-like 2                                                        | 0               | 3               | 0                | -1.87676            |
| 273  | 20054   | Rps15         | ribosomal protein S15                                                 | 0               | 5               | 0                | -1.875996           |
| 274  | 258468  | Olfir1254     | olfactory receptor 1254                                               | 0               | 3               | 0                | -1.872929           |
| 275  | 13669   | Eif3s10       | eukaryotic translation initiation factor 3, subunit A                 | 0               | 4               | 0                | -1.871942           |
| 276  | 26961   | Rpl8          | ribosomal protein L8                                                  | 0               | 4               | 0                | -1.870848           |
| 277  | 68550   | 1110002N22Rik | RIKEN cDNA 1110002N22 gene                                            | 0               | 3               | 0                | -1.869878           |
| 278  | 66922   | Rras2         | related RAS viral (r-ras) oncogene homolog 2                          | 0               | 3               | 0                | -1.86942            |
| 279  | 76932   | Arfip2        | ADP-ribosylation factor interacting protein 2                         | 0               | 3               | 0                | -1.868514           |
| 280  | 56717   | Frap1         | mechanistic target of rapamycin (serine/threonine kinase)             | 0               | 3               | 0                | -1.867851           |
| 281  | 102680  | Xtrp3s1       | solute carrier family 6 (neurotransmitter transporter), member 20A    | 0               | 3               | 0                | -1.867729           |
| 282  | 20807   | Srf           | serum response factor                                                 | 0               | 3               | 0                | -1.865409           |
| 283  | 319508  | Syt15         | synaptotagmin XV                                                      | 0               | 3               | 0                | -1.863561           |
| 284  | 12442   | Ccnb2         | cyclin B2                                                             | 0               | 3               | 0                | -1.862591           |
| 285  | 14199   | Fhl1          | four and a half LIM domains 1                                         | 0               | 3               | 0                | -1.859711           |
| 286  | 22034   | Traf6         | TNF receptor-associated factor 6                                      | 0               | 3               | 0                | -1.857557           |
| 287  | 66257   | Nicn1         | nicotin 1                                                             | 0               | 3               | 0                | -1.840389           |
| 288  | 69520   | 2310002A05Rik | late cornified envelope 3F                                            | 0               | 3               | 0                | -1.839958           |
| 289  | 21461   | Tcp10b        | t-complex protein 10a                                                 | 0               | 3               | 0                | -1.837816           |
| 290  | 20196   | S100a13       | S100 calcium binding protein A13                                      | 0               | 3               | 0                | -1.837202           |
| 291  | 68038   | 3110023E09Rik | chitinase domain containing 1                                         | 0               | 3               | 0                | -1.83064            |
| 292  | 55944   | Eif3s7        | eukaryotic translation initiation factor 3, subunit D                 | 0               | 3               | 0                | -1.827583           |
| 293  | 18120   | Mrpl49        | mitochondrial ribosomal protein L49                                   | 0               | 3               | 0                | -1.827508           |
| 294  | 641227  | UNK           | NA                                                                    | 0               | 3               | 0                | -1.82386            |
| 295  | 18784   | Pla2g5        | phospholipase A2, group V                                             | 0               | 3               | 0                | -1.82166            |
| 296  | 18715   | Pim2          | proviral integration site 2                                           | 0               | 3               | 0                | -1.821351           |
| 297  | 66469   | 2810405K02Rik | RIKEN cDNA 2810405K02 gene                                            | 0               | 3               | 0                | -1.821065           |
| 298  | 353234  | Pcdha2        | protocadherin alpha 2                                                 | 0               | 3               | 0                | -1.818826           |
| 299  | 67204   | Eif2s2        | eukaryotic translation initiation factor 2, subunit 2 (beta)          | 0               | 3               | 0                | -1.817172           |
| 300  | 67395   | 4930403L05Rik | protein phosphatase 1, regulatory (inhibitor) subunit 2, pseudogene 9 | 0               | 3               | 0                | -1.810252           |
| 301  | 329278  | Tnn           | tenascin N                                                            | 0               | 3               | 0                | -1.806694           |
| 302  | 194162  | BC035954      | NA                                                                    | 0               | 3               | 0                | -1.806535           |

## Candidates for positive regulators of normal growth (DESeq)

| Rank | entrez# | Gene Symbol   | Gene name                                                           | enriched shRNAs | depleted shRNAs | no change shRNAs | average Fold Change |
|------|---------|---------------|---------------------------------------------------------------------|-----------------|-----------------|------------------|---------------------|
| 303  | 233187  | Lim2          | lens intrinsic membrane protein 2                                   | 0               | 4               | 0                | -1.797216           |
| 304  | 57808   | Rpl35a        | ribosomal protein L35A                                              | 0               | 3               | 0                | -1.797049           |
| 305  | 103511  | BB146404      | family with sequence similarity 26, member E                        | 0               | 3               | 0                | -1.794471           |
| 306  | 12613   | Cel           | carboxyl ester lipase                                               | 0               | 3               | 0                | -1.792809           |
| 307  | 17293   | Mesp2         | mesoderm posterior 2                                                | 0               | 3               | 0                | -1.791005           |
| 308  | 71819   | Kif23         | kinesin family member 23                                            | 0               | 4               | 0                | -1.78876            |
| 309  | 58205   | Pdcd1lg2      | programmed cell death 1 ligand 2                                    | 0               | 3               | 0                | -1.784956           |
| 310  | 26386   | Hsf4          | heat shock transcription factor 4                                   | 0               | 3               | 0                | -1.783701           |
| 311  | 100678  | Psph          | phosphoserine phosphatase                                           | 0               | 3               | 0                | -1.783538           |
| 312  | 56031   | Ppie          | peptidylprolyl isomerase E (cyclophilin E)                          | 0               | 4               | 0                | -1.782773           |
| 313  | 20909   | Stx4a         | syntaxin 4A (placental)                                             | 0               | 3               | 0                | -1.777408           |
| 314  | 21976   | Top3b         | topoisomerase (DNA) III beta                                        | 0               | 3               | 0                | -1.771934           |
| 315  | 434390  | UNK           | NA                                                                  | 0               | 3               | 0                | -1.768253           |
| 316  | 14427   | Galr1         | galanin receptor 1                                                  | 0               | 3               | 0                | -1.76503            |
| 317  | 56289   | Rassf1        | Ras association (RalGDS/AF-6) domain family member 1                | 0               | 3               | 0                | -1.755222           |
| 318  | 76025   | Cant1         | calcium activated nucleotidase 1                                    | 0               | 3               | 0                | -1.754868           |
| 319  | 26946   | Trpc7         | transient receptor potential cation channel, subfamily C, member 7  | 0               | 3               | 0                | -1.753607           |
| 320  | 84653   | Hes7          | hairy and enhancer of split 7 (Drosophila)                          | 0               | 3               | 0                | -1.752555           |
| 321  | 381971  | UNK           | NA                                                                  | 0               | 3               | 0                | -1.747642           |
| 322  | 80284   | BC003266      | cDNA sequence BC003266                                              | 0               | 3               | 0                | -1.747192           |
| 323  | 320484  | A430107D22Rik | RAS protein activator like 3                                        | 0               | 3               | 0                | -1.744776           |
| 324  | 16491   | Kcna3         | potassium voltage-gated channel, shaker-related subfamily, member 3 | 0               | 3               | 0                | -1.7334             |
| 325  | 320795  | Pkn1          | protein kinase N1                                                   | 0               | 3               | 0                | -1.732132           |
| 326  | 67881   | 1810034K20Rik | magnesium-dependent phosphatase 1                                   | 0               | 4               | 0                | -1.73029            |
| 327  | 26942   | Spag1         | sperm associated antigen 1                                          | 0               | 3               | 0                | -1.725307           |
| 328  | 107503  | Atf5          | activating transcription factor 5                                   | 0               | 3               | 0                | -1.723926           |
| 329  | 20861   | Stfa1         | stefin A1                                                           | 0               | 3               | 0                | -1.722652           |
| 330  | 219134  | Tmem46        | shisa homolog 2 (Xenopus laevis)                                    | 0               | 3               | 0                | -1.719959           |
| 331  | 16476   | Jun           | Jun oncogene                                                        | 0               | 3               | 0                | -1.714142           |
| 332  | 69150   | Snx4          | sorting nexin 4                                                     | 0               | 3               | 0                | -1.710697           |
| 333  | 246049  | Slc36a2       | solute carrier family 36 (proton/amino acid symporter), member 2    | 0               | 3               | 0                | -1.707702           |
| 334  | 381075  | Gm936         | NA                                                                  | 0               | 3               | 0                | -1.706986           |
| 335  | 66887   | 1300002A08Rik | lon peptidase 2, peroxisomal                                        | 0               | 3               | 0                | -1.706268           |
| 336  | 64660   | Mrps24        | mitochondrial ribosomal protein S24                                 | 0               | 3               | 0                | -1.70547            |

## Candidates for positive regulators of normal growth (DESeq)

| Rank | entrez# | Gene Symbol   | Gene name                                                                                     | enriched shRNAs | depleted shRNAs | no change shRNAs | average Fold Change |
|------|---------|---------------|-----------------------------------------------------------------------------------------------|-----------------|-----------------|------------------|---------------------|
| 337  | 67226   | Tmem19        | transmembrane protein 19                                                                      | 0               | 3               | 0                | -1.699142           |
| 338  | 108096  | Slco1a5       | solute carrier organic anion transporter family, member 1a5                                   | 0               | 3               | 0                | -1.697142           |
| 339  | 116810  | Foxn4         | forkhead box N4                                                                               | 0               | 3               | 0                | -1.69015            |
| 340  | 13864   | Nr2f6         | nuclear receptor subfamily 2, group F, member 6                                               | 0               | 3               | 0                | -1.687957           |
| 341  | 68394   | O610037D15Rik | coiled-coil domain containing 163                                                             | 0               | 4               | 0                | -1.686642           |
| 342  | 20616   | Snap91        | synaptosomal-associated protein 91                                                            | 0               | 3               | 0                | -1.684893           |
| 343  | 68490   | Zfp579        | zinc finger protein 579                                                                       | 0               | 3               | 0                | -1.683572           |
| 344  | 64085   | Clstn2        | calsyntenin 2                                                                                 | 0               | 3               | 0                | -1.678149           |
| 345  | 192650  | Cabp7         | calcium binding protein 7                                                                     | 0               | 3               | 0                | -1.676291           |
| 346  | 70031   | Cmtm8         | CKLF-like MARVEL transmembrane domain containing 8                                            | 0               | 3               | 0                | -1.674804           |
| 347  | 67220   | Plekho1       | pleckstrin homology domain containing, family O member 1                                      | 0               | 3               | 0                | -1.665001           |
| 348  | 56459   | Uble1a        | SUMO1 activating enzyme subunit 1                                                             | 0               | 3               | 0                | -1.659287           |
| 349  | 71904   | Paqr7         | progesterin and adipoQ receptor family member VII                                             | 0               | 3               | 0                | -1.657571           |
| 350  | 240913  | Adamts4       | a disintegrin-like and metallopeptidase (reprolysin type) with thrombospondin type 1 motif, 4 | 0               | 3               | 0                | -1.657095           |
| 351  | 22245   | Uck1          | uridine-cytidine kinase 1                                                                     | 0               | 3               | 0                | -1.652274           |
| 352  | 17938   | Naca          | nascent polypeptide-associated complex alpha polypeptide                                      | 0               | 3               | 0                | -1.649857           |
| 353  | 271424  | Ihpk3         | inositol hexaphosphate kinase 3                                                               | 0               | 3               | 0                | -1.649074           |
| 354  | 58859   | Efemp2        | epidermal growth factor-containing fibulin-like extracellular matrix protein 2                | 0               | 3               | 0                | -1.643493           |
| 355  | 67334   | 1700054O13Rik | RIKEN cDNA 1700054O13 gene                                                                    | 0               | 3               | 0                | -1.642705           |
| 356  | 23966   | Odz4          | odd Oz/ten-m homolog 4 (Drosophila)                                                           | 0               | 3               | 0                | -1.637421           |
| 357  | 56009   | Refbp2        | Aly/REF export factor 2                                                                       | 0               | 3               | 0                | -1.637205           |
| 358  | 77976   | Nuak1         | NUAK family, SNF1-like kinase, 1                                                              | 0               | 3               | 0                | -1.631028           |
| 359  | 76894   | Mett5d1       | methyltransferase like 15                                                                     | 0               | 3               | 0                | -1.627343           |
| 360  | 57330   | Perq1         | GRB10 interacting GYF protein 1                                                               | 0               | 3               | 0                | -1.626702           |
| 361  | 381680  | BC055004      | cDNA sequence BC055004                                                                        | 0               | 3               | 0                | -1.62492            |
| 362  | 57294   | Rps27         | ribosomal protein S27                                                                         | 0               | 3               | 0                | -1.622095           |
| 363  | 244672  | Cwf19I2       | CWF19-like 2, cell cycle control (S. pombe)                                                   | 0               | 3               | 0                | -1.620563           |
| 364  | 72125   | 2600011E07Rik | family with sequence similarity 123, member A                                                 | 0               | 3               | 0                | -1.617317           |
| 365  | 16189   | Il4           | interleukin 4                                                                                 | 0               | 3               | 0                | -1.613697           |
| 366  | 232975  | Atp1a3        | ATPase, Na <sup>+</sup> /K <sup>+</sup> transporting, alpha 3 polypeptide                     | 0               | 3               | 0                | -1.605608           |
| 367  | 16841   | Lect2         | leukocyte cell-derived chemotaxin 2                                                           | 0               | 3               | 0                | -1.590037           |
| 368  | 16669   | Krt1-19       | keratin 19                                                                                    | 0               | 3               | 0                | -1.584136           |
| 369  | 68416   | Sycn          | syncollin                                                                                     | 0               | 3               | 0                | -1.583096           |
| 370  | 236193  | Zfp709        | zinc finger protein 709                                                                       | 0               | 3               | 0                | -1.568911           |

Candidates for positive regulators of normal growth (DESeq)

| Rank | entrez# | Gene Symbol   | Gene name                                             | enriched shRNAs | depleted shRNAs | no change shRNAs | average Fold Change |
|------|---------|---------------|-------------------------------------------------------|-----------------|-----------------|------------------|---------------------|
| 371  | 21371   | Tbca          | tubulin cofactor A                                    | 0               | 3               | 0                | -1.568531           |
| 372  | 20302   | Ccl3          | chemokine (C-C motif) ligand 3                        | 0               | 3               | 0                | -1.551862           |
| 373  | 105859  | Csdc2         | cold shock domain containing C2, RNA binding          | 0               | 3               | 0                | -1.541976           |
| 374  | 541307  | Ccl26l        | chemokine (C-C motif) ligand 26                       | 0               | 3               | 0                | -1.539372           |
| 375  | 27274   | Zfp354b       | zinc finger protein 354B                              | 0               | 3               | 0                | -1.538782           |
| 376  | 12514   | Cd68          | CD68 antigen                                          | 0               | 3               | 0                | -1.536279           |
| 377  | 226040  | E030010A14Rik | RIKEN cDNA E030010A14 gene                            | 0               | 3               | 0                | -1.532274           |
| 378  | 19434   | Rax           | retina and anterior neural fold homeobox              | 0               | 3               | 0                | -1.529605           |
| 379  | 67405   | Nts           | neurotensin                                           | 0               | 4               | 0                | -1.528188           |
| 380  | 229658  | Vangl1        | vang-like 1 (van gogh, Drosophila)                    | 0               | 3               | 0                | -1.516711           |
| 381  | 99296   | Hrh3          | histamine receptor H3                                 | 0               | 3               | 0                | -1.515707           |
| 382  | 171201  | V1rc28        | vomer nasal 1 receptor 21                             | 0               | 3               | 0                | -1.515048           |
| 383  | 66438   | Hamp2         | hepcidin antimicrobial peptide 2                      | 0               | 3               | 0                | -1.510203           |
| 384  | 56792   | A1586015      | signal transducing adaptor family member 1            | 0               | 3               | 0                | -1.509529           |
| 385  | 69178   | Snx5          | sorting nexin 5                                       | 0               | 3               | 0                | -1.504325           |
| 386  | 208967  | Thns1         | threonine synthase-like 1 (bacterial)                 | 0               | 2               | 0                | -4.955697           |
| 387  | 56347   | Eif3s8        | eukaryotic translation initiation factor 3, subunit C | 0               | 2               | 0                | -4.236063           |
| 388  | 241636  | Tgm6          | transglutaminase 6                                    | 0               | 2               | 0                | -4.162727           |
| 389  | 75345   | Slamf7        | SLAM family member 7                                  | 0               | 2               | 0                | -4.117643           |
| 390  | 232717  | BC048599      | protease, serine 58                                   | 0               | 2               | 0                | -4.032783           |
| 391  | 353172  | Gars          | glycyl-tRNA synthetase                                | 0               | 2               | 0                | -3.954275           |
| 392  | 66880   | Rsrc1         | arginine/serine-rich coiled-coil 1                    | 0               | 2               | 0                | -3.942481           |
| 393  | 17164   | Mapkapk2      | MAP kinase-activated protein kinase 2                 | 0               | 2               | 0                | -3.868957           |
| 394  | 100727  | Ugt2b34       | UDP glucuronosyltransferase 2 family, polypeptide B34 | 0               | 2               | 0                | -3.83469            |
| 395  | 73547   | 1700094E07Rik | dual specificity phosphatase 21                       | 0               | 2               | 0                | -3.718188           |
| 396  | 94185   | Tnfrsf21      | tumor necrosis factor receptor superfamily, member 21 | 0               | 2               | 0                | -3.713838           |
| 397  | 18208   | Ntn1          | netrin 1                                              | 0               | 2               | 0                | -3.683826           |
| 398  | 101943  | Sf3b3         | splicing factor 3b, subunit 3                         | 0               | 2               | 0                | -3.647536           |
| 399  | 19335   | Rab23         | RAB23, member RAS oncogene family                     | 0               | 2               | 0                | -3.610032           |
| 400  | 50755   | Fbxo18        | F-box protein 18                                      | 0               | 2               | 0                | -3.573242           |
| 401  | 171189  | V1rc16        | vomer nasal 1 receptor 17                             | 0               | 2               | 0                | -3.556701           |
| 402  | 53356   | Eif3s4        | eukaryotic translation initiation factor 3, subunit G | 0               | 2               | 0                | -3.542909           |
| 403  | 66480   | Rpl15         | ribosomal protein L15                                 | 0               | 2               | 0                | -3.529384           |
| 404  | 12447   | Ccne1         | cyclin E1                                             | 0               | 2               | 0                | -3.512436           |



## Candidates for positive regulators of normal growth (DESeq)

| Rank | entrez# | Gene Symbol   | Gene name                                                        | enriched shRNAs | depleted shRNAs | no change shRNAs | average Fold Change |
|------|---------|---------------|------------------------------------------------------------------|-----------------|-----------------|------------------|---------------------|
| 405  | 93687   | Csnk1a1       | casein kinase 1, alpha 1                                         | 0               | 2               | 0                | -3.502442           |
| 406  | 434683  | UNK           | NA                                                               | 0               | 2               | 0                | -3.491475           |
| 407  | 66616   | Snx9          | sorting nexin 9                                                  | 0               | 2               | 0                | -3.480285           |
| 408  | 21682   | Tec           | tec protein tyrosine kinase                                      | 0               | 2               | 0                | -3.471379           |
| 409  | 227733  | Pip5k1l       | phosphatidylinositol-4-phosphate 5-kinase-like 1                 | 0               | 2               | 0                | -3.450262           |
| 410  | 170768  | Pfkfb3        | 6-phosphofructo-2-kinase/fructose-2,6-biphosphatase 3            | 0               | 2               | 0                | -3.431403           |
| 411  | 12696   | Cirbp         | cold inducible RNA binding protein                               | 0               | 2               | 0                | -3.424378           |
| 412  | 56314   | Zfp113        | zinc finger protein 113                                          | 0               | 2               | 0                | -3.422376           |
| 413  | 56224   | Tspan5        | tetraspanin 5                                                    | 0               | 2               | 0                | -3.419057           |
| 414  | 209824  | V1rd15        | vomer nasal 1 receptor 183                                       | 0               | 2               | 0                | -3.401114           |
| 415  | 27979   | Eif3s9        | eukaryotic translation initiation factor 3, subunit B            | 0               | 2               | 0                | -3.333096           |
| 416  | 380795  | A1324046      | Immunoglobulin heavy constant gamma 3                            | 0               | 2               | 0                | -3.313363           |
| 417  | 19113   | Prlpe         | prolactin family 7, subfamily a, member 1                        | 0               | 2               | 0                | -3.291908           |
| 418  | 493809  | Taar3         | trace amine-associated receptor 3                                | 0               | 2               | 0                | -3.277896           |
| 419  | 170786  | Cd209a        | CD209a antigen                                                   | 0               | 2               | 0                | -3.274969           |
| 420  | 19823   | Rnf7          | ring finger protein 7                                            | 0               | 2               | 0                | -3.261129           |
| 421  | 19114   | Prlpf         | prolactin family 7, subfamily a, member 2                        | 0               | 2               | 0                | -3.251191           |
| 422  | 14625   | Gykl1         | glycerol kinase-like 1                                           | 0               | 2               | 0                | -3.242027           |
| 423  | 70546   | Zdhhc2        | zinc finger, DHH domain containing 2                             | 0               | 2               | 0                | -3.239931           |
| 424  | 18597   | Pdha1         | pyruvate dehydrogenase E1 alpha 1                                | 0               | 2               | 0                | -3.236328           |
| 425  | 258281  | Olf780        | olfactory receptor 780                                           | 0               | 2               | 0                | -3.235859           |
| 426  | 23983   | Pcbp1         | poly(rC) binding protein 1                                       | 0               | 2               | 0                | -3.233275           |
| 427  | 16551   | Kif11         | kinesin family member 11                                         | 0               | 2               | 0                | -3.227798           |
| 428  | 245026  | E330026B02Rik | collagen, type VI, alpha 6                                       | 0               | 2               | 0                | -3.218064           |
| 429  | 76789   | 2410129H14Rik | mitotic spindle organizing protein 1                             | 0               | 2               | 0                | -3.217067           |
| 430  | 57316   | C1d           | C1D nuclear receptor co-repressor                                | 0               | 2               | 0                | -3.200671           |
| 431  | 64658   | Mrps25        | mitochondrial ribosomal protein S25                              | 0               | 2               | 0                | -3.188544           |
| 432  | 15278   | Tfb2m         | transcription factor B2, mitochondrial                           | 0               | 2               | 0                | -3.166493           |
| 433  | 66298   | 2010016B13Rik | defensin, alpha, 21                                              | 0               | 2               | 0                | -3.160064           |
| 434  | 171195  | V1rc22        | vomer nasal 1 receptor 30                                        | 0               | 2               | 0                | -3.151747           |
| 435  | 503845  | Ear12         | eosinophil-associated, ribonuclease A family, member 12          | 0               | 2               | 0                | -3.137255           |
| 436  | 66471   | Anp32e        | acidic (leucine-rich) nuclear phosphoprotein 32 family, member E | 0               | 2               | 0                | -3.13376            |
| 437  | 215748  | Cnksr3        | Cnksr family member 3                                            | 0               | 2               | 0                | -3.122159           |
| 438  | 241727  | Snph          | syntaphilin                                                      | 0               | 2               | 0                | -3.113755           |

## Candidates for positive regulators of normal growth (DESeq)

| Rank | entrez# | Gene Symbol   | Gene name                                                    | enriched shRNAs | depleted shRNAs | no change shRNAs | average Fold Change |
|------|---------|---------------|--------------------------------------------------------------|-----------------|-----------------|------------------|---------------------|
| 439  | 67698   | Tmem157       | family with sequence similarity 174, member A                | 0               | 2               | 0                | -3.11005            |
| 440  | 319210  | 4930518C23Rik | vomer nasal 2, receptor, pseudogene 11                       | 0               | 2               | 0                | -3.105013           |
| 441  | 21402   | Skp1a         | S-phase kinase-associated protein 1A                         | 0               | 2               | 0                | -3.097285           |
| 442  | 22094   | Tshb          | thyroid stimulating hormone, beta subunit                    | 0               | 2               | 0                | -3.096766           |
| 443  | 319740  | Zfyve27       | zinc finger, FYVE domain containing 27                       | 0               | 2               | 0                | -3.089759           |
| 444  | 24061   | Smc1a         | structural maintenance of chromosomes 1A                     | 0               | 2               | 0                | -3.085598           |
| 445  | 100066  | Cyp2j11       | cytochrome P450, family 2, subfamily j, polypeptide 11       | 0               | 2               | 0                | -3.082458           |
| 446  | 214895  | Lman2l        | lectin, mannose-binding 2-like                               | 0               | 2               | 0                | -3.075993           |
| 447  | 14916   | Guca2b        | guanylate cyclase activator 2b (retina)                      | 0               | 2               | 0                | -3.075038           |
| 448  | 207350  | Itih5l        | NA                                                           | 0               | 2               | 0                | -3.067957           |
| 449  | 14068   | F7            | coagulation factor VII                                       | 0               | 2               | 0                | -3.064701           |
| 450  | 331188  | BC024063      | zinc finger protein 781                                      | 0               | 2               | 0                | -3.058862           |
| 451  | 435777  | UNK           | NA                                                           | 0               | 2               | 0                | -3.045952           |
| 452  | 71888   | 2310015J09Rik | keratin 33A                                                  | 0               | 2               | 0                | -3.027656           |
| 453  | 433238  | LOC433238     | predicted gene 5518                                          | 0               | 2               | 0                | -3.021381           |
| 454  | 381493  | S100a15       | S100 calcium binding protein A7A                             | 0               | 2               | 0                | -3.021246           |
| 455  | 67710   | Polr2g        | polymerase (RNA) II (DNA directed) polypeptide G             | 0               | 2               | 0                | -3.021187           |
| 456  | 245000  | Atr           | ataxia telangiectasia and Rad3 related                       | 0               | 2               | 0                | -3.007175           |
| 457  | 244179  | 4922504M18Rik | ubiquilin-like                                               | 0               | 2               | 0                | -3.00464            |
| 458  | 19024   | Ppfibp2       | PTPRF interacting protein, binding protein 2 (liprin beta 2) | 0               | 2               | 0                | -3.004281           |
| 459  | 12335   | Capn3         | calpain 3                                                    | 0               | 2               | 0                | -3.004172           |
| 460  | 78977   | Popdc3        | popeye domain containing 3                                   | 0               | 2               | 0                | -2.996558           |
| 461  | 11736   | Ankfy1        | ankyrin repeat and FYVE domain containing 1                  | 0               | 2               | 0                | -2.994345           |
| 462  | 237436  | Gas2l3        | growth arrest-specific 2 like 3                              | 0               | 2               | 0                | -2.990316           |
| 463  | 17130   | Smad6         | MAD homolog 6 (Drosophila)                                   | 0               | 2               | 0                | -2.989007           |
| 464  | 11632   | Aip           | aryl-hydrocarbon receptor-interacting protein                | 0               | 2               | 0                | -2.987992           |
| 465  | 18438   | P2rx4         | purinergic receptor P2X, ligand-gated ion channel 4          | 0               | 2               | 0                | -2.985434           |
| 466  | 59010   | Sqrdl         | sulfide quinone reductase-like (yeast)                       | 0               | 2               | 0                | -2.982504           |
| 467  | 23859   | Dlgh2         | discs, large homolog 2 (Drosophila)                          | 0               | 2               | 0                | -2.982256           |
| 468  | 218921  | 4930474N05Rik | RIKEN cDNA 4930474N05 gene                                   | 0               | 2               | 0                | -2.976397           |
| 469  | 75820   | 4930511H01Rik | WD repeat domain 64                                          | 0               | 2               | 0                | -2.969281           |
| 470  | 21881   | Tkt           | transketolase                                                | 0               | 2               | 0                | -2.968311           |
| 471  | 170735  | Arr3          | arrestin 3, retinal                                          | 0               | 2               | 0                | -2.965842           |
| 472  | 14805   | Grik1         | glutamate receptor, ionotropic, kainate 1                    | 0               | 2               | 0                | -2.950382           |

Candidates for positive regulators of normal growth (DESeq)

| Rank | entrez# | Gene Symbol   | Gene name                                                                              | enriched shRNAs | depleted shRNAs | no change shRNAs | average Fold Change |
|------|---------|---------------|----------------------------------------------------------------------------------------|-----------------|-----------------|------------------|---------------------|
| 473  | 66943   | Pqlc1         | PQ loop repeat containing 1                                                            | 0               | 2               | 0                | -2.945745           |
| 474  | 16907   | Lmnb2         | lamin B2                                                                               | 0               | 2               | 0                | -2.942817           |
| 475  | 252870  | Usp7          | ubiquitin specific peptidase 7                                                         | 0               | 2               | 0                | -2.937809           |
| 476  | 14469   | Gbp2          | guanylate binding protein 2                                                            | 0               | 2               | 0                | -2.936779           |
| 477  | 230598  | Nrd1          | nardilysin, N-arginine dibasic convertase, NRD convertase 1                            | 0               | 2               | 0                | -2.927941           |
| 478  | 53318   | Pdlim3        | PDZ and LIM domain 3                                                                   | 0               | 2               | 0                | -2.926931           |
| 479  | 17149   | Magoh         | mago-nashi homolog, proliferation-associated (Drosophila)                              | 0               | 2               | 0                | -2.918912           |
| 480  | 12331   | Cap1          | CAP, adenylate cyclase-associated protein 1 (yeast)                                    | 0               | 2               | 0                | -2.91671            |
| 481  | 11905   | Serpinc1      | serine (or cysteine) peptidase inhibitor, clade C (antithrombin), member 1             | 0               | 2               | 0                | -2.916498           |
| 482  | 66656   | Eef1d         | eukaryotic translation elongation factor 1 delta (guanine nucleotide exchange protein) | 0               | 2               | 0                | -2.909259           |
| 483  | 20500   | Slc13a2       | solute carrier family 13 (sodium-dependent dicarboxylate transporter), member 2        | 0               | 2               | 0                | -2.900488           |
| 484  | 14077   | Fabp3         | fatty acid binding protein 3, muscle and heart                                         | 0               | 2               | 0                | -2.900245           |
| 485  | 68314   | 0610008F07Rik | RIKEN cDNA 0610008F07 gene                                                             | 0               | 2               | 0                | -2.896287           |
| 486  | 72821   | Scn2b         | sodium channel, voltage-gated, type II, beta                                           | 0               | 2               | 0                | -2.892509           |
| 487  | 74996   | Usp47         | ubiquitin specific peptidase 47                                                        | 0               | 2               | 0                | -2.8857             |
| 488  | 56437   | Rrad          | Ras-related associated with diabetes                                                   | 0               | 2               | 0                | -2.883801           |
| 489  | 13525   | Adam26a       | a disintegrin and metallopeptidase domain 26A (testase 3)                              | 0               | 2               | 0                | -2.880389           |
| 490  | 14675   | Gna14         | guanine nucleotide binding protein, alpha 14                                           | 0               | 2               | 0                | -2.880382           |
| 491  | 53880   | Birc1g        | NLR family, apoptosis inhibitory protein 7                                             | 0               | 2               | 0                | -2.879332           |
| 492  | 67057   | Yaf2          | YY1 associated factor 2                                                                | 0               | 2               | 0                | -2.878444           |
| 493  | 75677   | Cldn22        | claudin 22                                                                             | 0               | 2               | 0                | -2.876964           |
| 494  | 93726   | Ear11         | eosinophil-associated, ribonuclease A family, member 11                                | 0               | 2               | 0                | -2.876357           |
| 495  | 12500   | Cd3d          | CD3 antigen, delta polypeptide                                                         | 0               | 2               | 0                | -2.874563           |
| 496  | 215387  | Brn1          | non-SMC condensin I complex, subunit H                                                 | 0               | 2               | 0                | -2.873647           |
| 497  | 233537  | Gdpd4         | glycerophosphodiester phosphodiesterase domain containing 4                            | 0               | 2               | 0                | -2.873322           |
| 498  | 29807   | Tpk1          | thiamine pyrophosphokinase                                                             | 0               | 2               | 0                | -2.872944           |
| 499  | 433926  | Lrrc8b        | leucine rich repeat containing 8 family, member B                                      | 0               | 2               | 0                | -2.868734           |
| 500  | 17928   | Myog          | myogenin                                                                               | 0               | 2               | 0                | -2.868159           |
| 501  | 19822   | Rnf4          | ring finger protein 4                                                                  | 0               | 2               | 0                | -2.86409            |
| 502  | 110521  | Hivep1        | human immunodeficiency virus type I enhancer binding protein 1                         | 0               | 2               | 0                | -2.860602           |
| 503  | 71954   | 2400003N08Rik | suppressor of defective silencing 3 homolog (S. cerevisiae)                            | 0               | 2               | 0                | -2.851562           |
| 504  | 67603   | Dusp6         | dual specificity phosphatase 6                                                         | 0               | 2               | 0                | -2.84917            |
| 505  | 71791   | Cpa4          | carboxypeptidase A4                                                                    | 0               | 2               | 0                | -2.847032           |
| 506  | 20394   | Scg5          | secretogranin V                                                                        | 0               | 2               | 0                | -2.843371           |

## Candidates for positive regulators of normal growth (DESeq)

| Rank | entrez# | Gene Symbol   | Gene name                                                                             | enriched shRNAs | depleted shRNAs | no change shRNAs | average Fold Change |
|------|---------|---------------|---------------------------------------------------------------------------------------|-----------------|-----------------|------------------|---------------------|
| 507  | 213827  | Arcn1         | archain 1                                                                             | 0               | 2               | 0                | -2.842606           |
| 508  | 94187   | Zfp423        | zinc finger protein 423                                                               | 0               | 2               | 0                | -2.834448           |
| 509  | 217119  | Xylt2         | xylosyltransferase II                                                                 | 0               | 2               | 0                | -2.832128           |
| 510  | 226043  | Cbwd1         | COBW domain containing 1                                                              | 0               | 2               | 0                | -2.823425           |
| 511  | 14811   | Grin2a        | glutamate receptor, ionotropic, NMDA2A (epsilon 1)                                    | 0               | 2               | 0                | -2.822842           |
| 512  | 217344  | Rhbdf2        | rhomboid 5 homolog 2 (Drosophila)                                                     | 0               | 2               | 0                | -2.819153           |
| 513  | 244199  | Ovch2         | ovochoymase 2                                                                         | 0               | 2               | 0                | -2.815039           |
| 514  | 67775   | Rtp4          | receptor transporter protein 4                                                        | 0               | 2               | 0                | -2.81502            |
| 515  | 67429   | Nudcd1        | NudC domain containing 1                                                              | 0               | 2               | 0                | -2.814584           |
| 516  | 214254  | Nudt15        | nudix (nucleoside diphosphate linked moiety X)-type motif 15                          | 0               | 2               | 0                | -2.813464           |
| 517  | 67374   | Jam2          | junction adhesion molecule 2                                                          | 0               | 2               | 0                | -2.812572           |
| 518  | 14313   | Fst           | follistatin                                                                           | 0               | 2               | 0                | -2.811331           |
| 519  | 26381   | Esrrg         | estrogen-related receptor gamma                                                       | 0               | 2               | 0                | -2.807749           |
| 520  | 80903   | Fgf16         | fibroblast growth factor 16                                                           | 0               | 2               | 0                | -2.804877           |
| 521  | 20400   | Sh2d1a        | SH2 domain protein 1A                                                                 | 0               | 2               | 0                | -2.804368           |
| 522  | 56353   | Rybp          | RING1 and YY1 binding protein                                                         | 0               | 2               | 0                | -2.803474           |
| 523  | 67848   | Ddx55         | DEAD (Asp-Glu-Ala-Asp) box polypeptide 55                                             | 0               | 2               | 0                | -2.801523           |
| 524  | 16630   | Klra12        | killer cell lectin-like receptor subfamily A, member 12                               | 0               | 2               | 0                | -2.800171           |
| 525  | 28080   | Atp5o         | ATP synthase, H+ transporting, mitochondrial F1 complex, O subunit                    | 0               | 2               | 0                | -2.799423           |
| 526  | 20378   | Frzb          | frizzled-related protein                                                              | 0               | 2               | 0                | -2.798766           |
| 527  | 102193  | Zdhhc7        | zinc finger, DHHC domain containing 7                                                 | 0               | 2               | 0                | -2.79022            |
| 528  | 83701   | Ars2          | serrate RNA effector molecule homolog (Arabidopsis)                                   | 0               | 2               | 0                | -2.789888           |
| 529  | 12455   | Ccnt1         | cyclin T1                                                                             | 0               | 2               | 0                | -2.789021           |
| 530  | 22761   | Zfp1          | zinc finger protein, multitype 1                                                      | 0               | 2               | 0                | -2.784271           |
| 531  | 70363   | 1700010C24Rik | family with sequence similarity 135, member B                                         | 0               | 2               | 0                | -2.781068           |
| 532  | 77128   | A930001N09Rik | RIKEN cDNA A930001N09 gene                                                            | 0               | 2               | 0                | -2.777195           |
| 533  | 80720   | Pbx4          | pre B cell leukemia homeobox 4                                                        | 0               | 2               | 0                | -2.775481           |
| 534  | 69481   | 1700029I08Rik | actin-like 9                                                                          | 0               | 2               | 0                | -2.771111           |
| 535  | 386422  | UNK           | NA                                                                                    | 0               | 2               | 0                | -2.768877           |
| 536  | 18771   | Pknox1        | Pbx/knotted 1 homeobox                                                                | 0               | 2               | 0                | -2.767644           |
| 537  | 270135  | BC038156      | NA                                                                                    | 0               | 2               | 0                | -2.76554            |
| 538  | 433718  | UNK           | NA                                                                                    | 0               | 2               | 0                | -2.765443           |
| 539  | 214238  | UNK           | NA                                                                                    | 0               | 2               | 0                | -2.763873           |
| 540  | 13871   | Ercc2         | excision repair cross-complementing rodent repair deficiency, complementation group 2 | 0               | 2               | 0                | -2.759652           |

## Candidates for positive regulators of normal growth (DESeq)

| Rank | entrez# | Gene Symbol   | Gene name                                                                                         | enriched shRNAs | depleted shRNAs | no change shRNAs | average Fold Change |
|------|---------|---------------|---------------------------------------------------------------------------------------------------|-----------------|-----------------|------------------|---------------------|
| 541  | 56716   | Gbl           | MTOR associated protein, LST8 homolog (S. cerevisiae)                                             | 0               | 2               | 0                | -2.758291           |
| 542  | 227622  | BC029214      | cDNA sequence BC029214                                                                            | 0               | 2               | 0                | -2.757855           |
| 543  | 66970   | Ssbp2         | single-stranded DNA binding protein 2                                                             | 0               | 2               | 0                | -2.757219           |
| 544  | 433073  | LOC433073     | actin related protein 2/3 complex, subunit 2 pseudogene                                           | 0               | 2               | 0                | -2.756187           |
| 545  | 270035  | D030041N04Rik | leucine zipper-EF-hand containing transmembrane protein 2                                         | 0               | 2               | 0                | -2.752613           |
| 546  | 76263   | Gstk1         | glutathione S-transferase kappa 1                                                                 | 0               | 2               | 0                | -2.746811           |
| 547  | 267019  | Rps15a        | ribosomal protein S15A                                                                            | 0               | 2               | 0                | -2.742636           |
| 548  | 85305   | Kars          | lysyl-tRNA synthetase                                                                             | 0               | 2               | 0                | -2.736216           |
| 549  | 268470  | Ube2z         | ubiquitin-conjugating enzyme E2Z (putative)                                                       | 0               | 2               | 0                | -2.735038           |
| 550  | 20588   | Smarcc1       | SWI/SNF related, matrix associated, actin dependent regulator of chromatin, subfamily c, member 1 | 0               | 2               | 0                | -2.730615           |
| 551  | 434203  | Slc28a1       | solute carrier family 28 (sodium-coupled nucleoside transporter), member 1                        | 0               | 2               | 0                | -2.729804           |
| 552  | 72486   | 2610206B13Rik | ring finger protein 219                                                                           | 0               | 2               | 0                | -2.725686           |
| 553  | 103098  | Slc6a15       | solute carrier family 6 (neurotransmitter transporter), member 15                                 | 0               | 2               | 0                | -2.724254           |
| 554  | 69790   | Thrap6        | mediator complex subunit 30                                                                       | 0               | 2               | 0                | -2.721611           |
| 555  | 383073  | UNK           | NA                                                                                                | 0               | 2               | 0                | -2.72064            |
| 556  | 11603   | Agrn          | agrin                                                                                             | 0               | 2               | 0                | -2.720337           |
| 557  | 93897   | Fzd10         | frizzled homolog 10 (Drosophila)                                                                  | 0               | 2               | 0                | -2.720083           |
| 558  | 76897   | 0710005M24Rik | RALY RNA binding protein-like                                                                     | 0               | 2               | 0                | -2.718516           |
| 559  | 110446  | Acat1         | acetyl-Coenzyme A acetyltransferase 1                                                             | 0               | 2               | 0                | -2.705567           |
| 560  | 382206  | Ssx9          | synovial sarcoma, X breakpoint 9                                                                  | 0               | 2               | 0                | -2.705467           |
| 561  | 113852  | V1rb1         | vomer nasal 1 receptor 50                                                                         | 0               | 2               | 0                | -2.704871           |
| 562  | 245841  | Polr2h        | polymerase (RNA) II (DNA directed) polypeptide H                                                  | 0               | 2               | 0                | -2.704598           |
| 563  | 319229  | Sctr          | secretin receptor                                                                                 | 0               | 2               | 0                | -2.69939            |
| 564  | 71838   | Phf7          | PHD finger protein 7                                                                              | 0               | 2               | 0                | -2.697445           |
| 565  | 103988  | Gck           | glucokinase                                                                                       | 0               | 2               | 0                | -2.697391           |
| 566  | 70616   | Sf4           | SURP and G patch domain containing 1                                                              | 0               | 2               | 0                | -2.69646            |
| 567  | 68801   | Elov15        | ELOVL family member 5, elongation of long chain fatty acids (yeast)                               | 0               | 2               | 0                | -2.693582           |
| 568  | 56787   | Ascl3         | achaete-scute complex homolog 3 (Drosophila)                                                      | 0               | 2               | 0                | -2.690885           |
| 569  | 406186  | Olf142        | olfactory receptor 142                                                                            | 0               | 2               | 0                | -2.690674           |
| 570  | 353170  | 4932441K18Rik | taxilin gamma                                                                                     | 0               | 2               | 0                | -2.688114           |
| 571  | 75288   | Slc35f4       | solute carrier family 35, member F4                                                               | 0               | 2               | 0                | -2.686467           |
| 572  | 73016   | Kremen2       | kringle containing transmembrane protein 2                                                        | 0               | 2               | 0                | -2.684911           |
| 573  | 12939   | Pcdha7        | protocadherin alpha 7                                                                             | 0               | 2               | 0                | -2.684721           |
| 574  | 384890  | UNK           | NA                                                                                                | 0               | 2               | 0                | -2.684117           |

## Candidates for positive regulators of normal growth (DESeq)

| Rank | entrez# | Gene Symbol   | Gene name                                                                | enriched shRNAs | depleted shRNAs | no change shRNAs | average Fold Change |
|------|---------|---------------|--------------------------------------------------------------------------|-----------------|-----------------|------------------|---------------------|
| 575  | 68205   | 2900073H19Rik | ubiquitin related modifier 1 homolog ( <i>S. cerevisiae</i> )            | 0               | 2               | 0                | -2.68339            |
| 576  | 104303  | Arl1          | ADP-ribosylation factor-like 1                                           | 0               | 2               | 0                | -2.67142            |
| 577  | 16198   | Il9           | interleukin 9                                                            | 0               | 2               | 0                | -2.66957            |
| 578  | 21343   | Taf6          | TAF6 RNA polymerase II, TATA box binding protein (TBP)-associated factor | 0               | 2               | 0                | -2.664725           |
| 579  | 66586   | Crls1         | cardiolipin synthase 1                                                   | 0               | 2               | 0                | -2.66306            |
| 580  | 74412   | Gle1l         | GLE1 RNA export mediator (yeast)                                         | 0               | 2               | 0                | -2.660233           |
| 581  | 272680  | UNK           | NA                                                                       | 0               | 2               | 0                | -2.658779           |
| 582  | 212647  | Aldh4a1       | aldehyde dehydrogenase 4 family, member A1                               | 0               | 2               | 0                | -2.652805           |
| 583  | 71986   | Ddx28         | DEAD (Asp-Glu-Ala-Asp) box polypeptide 28                                | 0               | 2               | 0                | -2.651647           |
| 584  | 170733  | Klra17        | killer cell lectin-like receptor, subfamily A, member 17                 | 0               | 2               | 0                | -2.647379           |
| 585  | 270076  | Gcdh          | glutaryl-Coenzyme A dehydrogenase                                        | 0               | 2               | 0                | -2.646232           |
| 586  | 13090   | Cyp2b19       | cytochrome P450, family 2, subfamily b, polypeptide 19                   | 0               | 2               | 0                | -2.645991           |
| 587  | 70673   | Prdm16        | PR domain containing 16                                                  | 0               | 2               | 0                | -2.641644           |
| 588  | 258450  | Olf1199       | olfactory receptor 1199                                                  | 0               | 2               | 0                | -2.64036            |
| 589  | 113862  | V1rc5         | vomer nasal 1 receptor 13                                                | 0               | 2               | 0                | -2.640302           |
| 590  | 226641  | Atf6          | activating transcription factor 6                                        | 0               | 2               | 0                | -2.639768           |
| 591  | 213311  | Fbxl21        | F-box and leucine-rich repeat protein 21                                 | 0               | 2               | 0                | -2.629896           |
| 592  | 67455   | Klhl13        | kelch-like 13 ( <i>Drosophila</i> )                                      | 0               | 2               | 0                | -2.629752           |
| 593  | 64294   | Itn2c         | integral membrane protein 2C                                             | 0               | 2               | 0                | -2.629639           |
| 594  | 242109  | Zfp697        | zinc finger protein 697                                                  | 0               | 2               | 0                | -2.629135           |
| 595  | 54447   | Asah2         | N-acylsphingosine amidohydrolase 2                                       | 0               | 2               | 0                | -2.626738           |
| 596  | 74616   | Scrn3         | secernin 3                                                               | 0               | 2               | 0                | -2.626103           |
| 597  | 18050   | Klk1b3        | kallikrein 1-related peptidase b3                                        | 0               | 2               | 0                | -2.625593           |
| 598  | 15207   | Hes3          | hairy and enhancer of split 3 ( <i>Drosophila</i> )                      | 0               | 2               | 0                | -2.625069           |
| 599  | 53311   | Mybph         | myosin binding protein H                                                 | 0               | 2               | 0                | -2.621833           |
| 600  | 29857   | Mapk12        | mitogen-activated protein kinase 12                                      | 0               | 2               | 0                | -2.618559           |
| 601  | 67078   | 1700012G19Rik | phosphoglycolate phosphatase                                             | 0               | 2               | 0                | -2.612566           |
| 602  | 17058   | Klrb1b        | NA                                                                       | 0               | 2               | 0                | -2.61049            |
| 603  | 74102   | Slc35a5       | solute carrier family 35, member A5                                      | 0               | 2               | 0                | -2.609134           |
| 604  | 13350   | Dgat1         | diacylglycerol O-acyltransferase 1                                       | 0               | 2               | 0                | -2.607903           |
| 605  | 23988   | Pin1          | protein (peptidyl-prolyl cis/trans isomerase) NIMA-interacting 1         | 0               | 2               | 0                | -2.605662           |
| 606  | 11479   | Acvr1b        | activin A receptor, type 1B                                              | 0               | 2               | 0                | -2.605388           |
| 607  | 14712   | Gnpat         | glyceronephosphate O-acyltransferase                                     | 0               | 2               | 0                | -2.60262            |
| 608  | 22333   | Vdac1         | voltage-dependent anion channel 1                                        | 0               | 2               | 0                | -2.60065            |

## Candidates for positive regulators of normal growth (DESeq)

| Rank | entrez# | Gene Symbol   | Gene name                                                              | enriched shRNAs | depleted shRNAs | no change shRNAs | average Fold Change |
|------|---------|---------------|------------------------------------------------------------------------|-----------------|-----------------|------------------|---------------------|
| 609  | 192161  | Pcdha9        | protocadherin alpha 9                                                  | 0               | 2               | 0                | -2.599188           |
| 610  | 23908   | Hs2st1        | heparan sulfate 2-O-sulfotransferase 1                                 | 0               | 2               | 0                | -2.597429           |
| 611  | 16509   | Kcne1         | potassium voltage-gated channel, Isk-related subfamily, member 1       | 0               | 2               | 0                | -2.597247           |
| 612  | 67248   | Rpl39         | ribosomal protein L39                                                  | 0               | 2               | 0                | -2.594541           |
| 613  | 67030   | Fancl         | Fanconi anemia, complementation group L                                | 0               | 2               | 0                | -2.594004           |
| 614  | 69906   | Slc25a32      | solute carrier family 25, member 32                                    | 0               | 2               | 0                | -2.593505           |
| 615  | 67503   | 1700001G17Rik | RIKEN cDNA 1700001G17 gene                                             | 0               | 2               | 0                | -2.592659           |
| 616  | 22598   | Slc6a18       | solute carrier family 6 (neurotransmitter transporter), member 18      | 0               | 2               | 0                | -2.591104           |
| 617  | 233649  | Cnga4         | cyclic nucleotide gated channel alpha 4                                | 0               | 2               | 0                | -2.588184           |
| 618  | 231889  | Bud31         | BUD31 homolog (yeast)                                                  | 0               | 2               | 0                | -2.587539           |
| 619  | 15925   | Ide           | insulin degrading enzyme                                               | 0               | 2               | 0                | -2.585972           |
| 620  | 432825  | LOC432825     | predicted gene 5458                                                    | 0               | 2               | 0                | -2.585296           |
| 621  | 319476  | Lrtm1         | leucine-rich repeats and transmembrane domains 1                       | 0               | 2               | 0                | -2.580502           |
| 622  | 71963   | Cdca4         | cell division cycle associated 4                                       | 0               | 2               | 0                | -2.578791           |
| 623  | 19353   | Rac1          | RAS-related C3 botulinum substrate 1                                   | 0               | 2               | 0                | -2.577521           |
| 624  | 22088   | Tsg101        | tumor susceptibility gene 101                                          | 0               | 2               | 0                | -2.576704           |
| 625  | 16828   | Ldha          | lactate dehydrogenase A                                                | 0               | 2               | 0                | -2.573499           |
| 626  | 19361   | Rad51         | RAD51 homolog (S. cerevisiae)                                          | 0               | 2               | 0                | -2.571838           |
| 627  | 74204   | Xpo6          | exportin 6                                                             | 0               | 2               | 0                | -2.570558           |
| 628  | 57748   | Jmy           | junction-mediating and regulatory protein                              | 0               | 2               | 0                | -2.569681           |
| 629  | 384814  | LOC384814     | predicted gene 5347                                                    | 0               | 2               | 0                | -2.56546            |
| 630  | 73626   | 1810009J06Rik | RIKEN cDNA 1810009J06 gene                                             | 0               | 2               | 0                | -2.565452           |
| 631  | 170750  | Xpnpep1       | X-prolyl aminopeptidase (aminopeptidase P) 1, soluble                  | 0               | 2               | 0                | -2.563514           |
| 632  | 110391  | Qdpr          | quinoid dihydropteridine reductase                                     | 0               | 2               | 0                | -2.560192           |
| 633  | 217169  | Tns4          | tensin 4                                                               | 0               | 2               | 0                | -2.558162           |
| 634  | 192164  | Pcdha12       | protocadherin alpha 12                                                 | 0               | 2               | 0                | -2.55658            |
| 635  | 242126  | Slc22a15      | solute carrier family 22 (organic anion/cation transporter), member 15 | 0               | 2               | 0                | -2.555315           |
| 636  | 16675   | Krt1-c29      | keratin 27                                                             | 0               | 2               | 0                | -2.555285           |
| 637  | 74011   | Slc25a27      | solute carrier family 25, member 27                                    | 0               | 2               | 0                | -2.550197           |
| 638  | 76654   | Upp2          | uridine phosphorylase 2                                                | 0               | 2               | 0                | -2.550057           |
| 639  | 72181   | Nsun4         | NOL1/NOP2/Sun domain family, member 4                                  | 0               | 2               | 0                | -2.543089           |
| 640  | 224640  | Lemd2         | LEM domain containing 2                                                | 0               | 2               | 0                | -2.543074           |
| 641  | 67719   | 2310057J18Rik | RIKEN cDNA 2310057J18 gene                                             | 0               | 2               | 0                | -2.542016           |
| 642  | 216285  | Cart1         | ALX homeobox 1                                                         | 0               | 2               | 0                | -2.542002           |

## Candidates for positive regulators of normal growth (DESeq)

| Rank | entrez# | Gene Symbol   | Gene name                                                           | enriched shRNAs | depleted shRNAs | no change shRNAs | average Fold Change |
|------|---------|---------------|---------------------------------------------------------------------|-----------------|-----------------|------------------|---------------------|
| 643  | 98878   | Ehd4          | EH-domain containing 4                                              | 0               | 2               | 0                | -2.538045           |
| 644  | 67276   | Thex1         | exoribonuclease 1                                                   | 0               | 2               | 0                | -2.536523           |
| 645  | 171256  | V1ri5         | vomeronasal 1 receptor 218                                          | 0               | 2               | 0                | -2.535598           |
| 646  | 269397  | Ss18l1        | synovial sarcoma translocation gene on chromosome 18-like 1         | 0               | 2               | 0                | -2.534713           |
| 647  | 171194  | V1rc21        | vomeronasal 1 receptor 4                                            | 0               | 2               | 0                | -2.53344            |
| 648  | 16518   | Kcnj2         | potassium inwardly-rectifying channel, subfamily J, member 2        | 0               | 2               | 0                | -2.532688           |
| 649  | 268935  | Scube3        | signal peptide, CUB domain, EGF-like 3                              | 0               | 2               | 0                | -2.531408           |
| 650  | 17183   | Matn4         | matrilin 4                                                          | 0               | 2               | 0                | -2.530352           |
| 651  | 258348  | Olf1133       | olfactory receptor 1133                                             | 0               | 2               | 0                | -2.528554           |
| 652  | 108956  | 2210421G13Rik | apolipoprotein L 7c                                                 | 0               | 2               | 0                | -2.527866           |
| 653  | 243659  | Styk1         | serine/threonine/tyrosine kinase 1                                  | 0               | 2               | 0                | -2.527673           |
| 654  | 231293  | C130090K23Rik | cell wall biogenesis 43 C-terminal homolog ( <i>S. cerevisiae</i> ) | 0               | 2               | 0                | -2.519173           |
| 655  | 75905   | 4930578C19Rik | RIKEN cDNA 4930578C19 gene                                          | 0               | 2               | 0                | -2.51687            |
| 656  | 18805   | Pld1          | phospholipase D1                                                    | 0               | 2               | 0                | -2.516095           |
| 657  | 14380   | G6pd2         | glucose-6-phosphate dehydrogenase 2                                 | 0               | 2               | 0                | -2.511757           |
| 658  | 71382   | Pex1          | peroxisomal biogenesis factor 1                                     | 0               | 2               | 0                | -2.510611           |
| 659  | 22702   | Zfp42         | zinc finger protein 42                                              | 0               | 2               | 0                | -2.508761           |
| 660  | 75212   | Rnf121        | ring finger protein 121                                             | 0               | 2               | 0                | -2.505605           |
| 661  | 14462   | Gata3         | GATA binding protein 3                                              | 0               | 2               | 0                | -2.50441            |
| 662  | 72124   | Seh1l         | SEH1-like ( <i>S. cerevisiae</i> )                                  | 0               | 2               | 0                | -2.503087           |
| 663  | 12660   | Chka          | choline kinase alpha                                                | 0               | 2               | 0                | -2.501303           |
| 664  | 17153   | Mal           | myelin and lymphocyte protein, T cell differentiation protein       | 0               | 2               | 0                | -2.497152           |
| 665  | 14810   | Grin1         | glutamate receptor, ionotropic, NMDA1 (zeta 1)                      | 0               | 2               | 0                | -2.497002           |
| 666  | 54709   | Eif3s2        | eukaryotic translation initiation factor 3, subunit I               | 0               | 2               | 0                | -2.496609           |
| 667  | 258699  | Olf1446       | olfactory receptor 1446                                             | 0               | 2               | 0                | -2.495468           |
| 668  | 20307   | Ccl8          | chemokine (C-C motif) ligand 8                                      | 0               | 2               | 0                | -2.491696           |
| 669  | 50773   | Nt5c          | 5',3'-nucleotidase, cytosolic                                       | 0               | 2               | 0                | -2.491248           |
| 670  | 215890  | A330019N05Rik | clavesin 2                                                          | 0               | 2               | 0                | -2.49077            |
| 671  | 216618  | Ccdc104       | coiled-coil domain containing 104                                   | 0               | 2               | 0                | -2.488224           |
| 672  | 11571   | Crisp1        | cysteine-rich secretory protein 1                                   | 0               | 2               | 0                | -2.488132           |
| 673  | 19046   | Ppp1cb        | protein phosphatase 1, catalytic subunit, beta isoform              | 0               | 2               | 0                | -2.48655            |
| 674  | 14719   | Got2          | glutamate oxaloacetate transaminase 2, mitochondrial                | 0               | 2               | 0                | -2.485038           |
| 675  | 12045   | Bcl2a1b       | B cell leukemia/lymphoma 2 related protein A1b                      | 0               | 2               | 0                | -2.484373           |
| 676  | 216019  | Hkdc1         | hexokinase domain containing 1                                      | 0               | 2               | 0                | -2.483557           |



## Candidates for positive regulators of normal growth (DESeq)

| Rank | entrez# | Gene Symbol   | Gene name                                                                         | enriched shRNAs | depleted shRNAs | no change shRNAs | average Fold Change |
|------|---------|---------------|-----------------------------------------------------------------------------------|-----------------|-----------------|------------------|---------------------|
| 677  | 74042   | 4921501E09Rik | RIKEN cDNA 4921501E09 gene                                                        | 0               | 2               | 0                | -2.481985           |
| 678  | 74245   | Ctbs          | chitinase, di-N-acetyl-                                                           | 0               | 2               | 0                | -2.479272           |
| 679  | 236790  | 6330505F04Rik | DEAD/H (Asp-Glu-Ala-Asp/His) box polypeptide 26B                                  | 0               | 2               | 0                | -2.478653           |
| 680  | 170729  | Scrt1         | scratch homolog 1, zinc finger protein (Drosophila)                               | 0               | 2               | 0                | -2.474228           |
| 681  | 268391  | A830031A19Rik | RIKEN cDNA A830031A19 gene                                                        | 0               | 2               | 0                | -2.473295           |
| 682  | 54196   | Pabpn1        | poly(A) binding protein, nuclear 1                                                | 0               | 2               | 0                | -2.472157           |
| 683  | 26414   | Mapk10        | mitogen-activated protein kinase 10                                               | 0               | 2               | 0                | -2.471916           |
| 684  | 20361   | Sema7a        | sema domain, immunoglobulin domain (Ig), and GPI membrane anchor, (semaphorin) 7A | 0               | 2               | 0                | -2.470606           |
| 685  | 93675   | Clec2i        | C-type lectin domain family 2, member i                                           | 0               | 2               | 0                | -2.470402           |
| 686  | 20311   | Cxcl5         | chemokine (C-X-C motif) ligand 5                                                  | 0               | 2               | 0                | -2.463709           |
| 687  | 18548   | Pcsk1         | proprotein convertase subtilisin/kexin type 1                                     | 0               | 2               | 0                | -2.459634           |
| 688  | 105148  | Iars          | isoleucine-tRNA synthetase                                                        | 0               | 2               | 0                | -2.455485           |
| 689  | 434071  | UNK           | NA                                                                                | 0               | 2               | 0                | -2.454226           |
| 690  | 74318   | Hod           | HOP homeobox                                                                      | 0               | 2               | 0                | -2.454117           |
| 691  | 80906   | Kcnip2        | Kv channel-interacting protein 2                                                  | 0               | 2               | 0                | -2.453441           |
| 692  | 20229   | Sat1          | spermidine/spermine N1-acetyl transferase 1                                       | 0               | 2               | 0                | -2.45092            |
| 693  | 140579  | Elmo2         | engulfment and cell motility 2, ced-12 homolog (C. elegans)                       | 0               | 2               | 0                | -2.450134           |
| 694  | 27411   | Slc14a2       | solute carrier family 14 (urea transporter), member 2                             | 0               | 2               | 0                | -2.449548           |
| 695  | 65079   | Rtn4r         | reticulin 4 receptor                                                              | 0               | 2               | 0                | -2.448655           |
| 696  | 22423   | Wnt8b         | wingless related MMTV integration site 8b                                         | 0               | 2               | 0                | -2.448186           |
| 697  | 436244  | UNK           | NA                                                                                | 0               | 2               | 0                | -2.442556           |
| 698  | 17535   | Mre11a        | meiotic recombination 11 homolog A (S. cerevisiae)                                | 0               | 2               | 0                | -2.441195           |
| 699  | 235324  | UNK           | NA                                                                                | 0               | 2               | 0                | -2.439481           |
| 700  | 217116  | Spata20       | spermatogenesis associated 20                                                     | 0               | 2               | 0                | -2.435259           |
| 701  | 66380   | Krtap3-3      | keratin associated protein 3-3                                                    | 0               | 2               | 0                | -2.43453            |
| 702  | 15408   | Hoxb13        | homeobox B13                                                                      | 0               | 2               | 0                | -2.433825           |
| 703  | 72654   | Ccdc12        | coiled-coil domain containing 12                                                  | 0               | 2               | 0                | -2.433116           |
| 704  | 69982   | Spink2        | serine peptidase inhibitor, Kazal type 2                                          | 0               | 2               | 0                | -2.432134           |
| 705  | 11451   | Acrv1         | acrosomal vesicle protein 1                                                       | 0               | 2               | 0                | -2.428491           |
| 706  | 224045  | Eif2b5        | eukaryotic translation initiation factor 2B, subunit 5 epsilon                    | 0               | 2               | 0                | -2.425294           |
| 707  | 56357   | Ivd           | isovaleryl coenzyme A dehydrogenase                                               | 0               | 2               | 0                | -2.424943           |
| 708  | 244555  | UNK           | NA                                                                                | 0               | 2               | 0                | -2.424472           |
| 709  | 14950   | H13           | histocompatibility 13                                                             | 0               | 2               | 0                | -2.424175           |
| 710  | 67337   | Cstf1         | cleavage stimulation factor, 3' pre-RNA, subunit 1                                | 0               | 2               | 0                | -2.422175           |

## Candidates for positive regulators of normal growth (DESeq)

| Rank | entrez# | Gene Symbol   | Gene name                                                                | enriched shRNAs | depleted shRNAs | no change shRNAs | average Fold Change |
|------|---------|---------------|--------------------------------------------------------------------------|-----------------|-----------------|------------------|---------------------|
| 711  | 12476   | Cd151         | CD151 antigen                                                            | 0               | 2               | 0                | -2.4217             |
| 712  | 13115   | Cyp27b1       | cytochrome P450, family 27, subfamily b, polypeptide 1                   | 0               | 2               | 0                | -2.421386           |
| 713  | 11836   | Araf          | v-raf murine sarcoma 3611 viral oncogene homolog                         | 0               | 2               | 0                | -2.421363           |
| 714  | 11550   | Adra1d        | adrenergic receptor, alpha 1d                                            | 0               | 2               | 0                | -2.420175           |
| 715  | 12803   | Cntf          | ciliary neurotrophic factor                                              | 0               | 2               | 0                | -2.41682            |
| 716  | 19231   | Ptma          | prothymosin alpha                                                        | 0               | 2               | 0                | -2.416722           |
| 717  | 258682  | Olf1436       | olfactory receptor 1436                                                  | 0               | 2               | 0                | -2.416352           |
| 718  | 18647   | Pf1k1         | cyclin-dependent kinase 14                                               | 0               | 2               | 0                | -2.416032           |
| 719  | 394436  | Ugt1a1        | UDP glucuronosyltransferase 1 family, polypeptide A1                     | 0               | 2               | 0                | -2.414542           |
| 720  | 23882   | Gadd45g       | growth arrest and DNA-damage-inducible 45 gamma                          | 0               | 2               | 0                | -2.413222           |
| 721  | 20322   | Sord          | sorbitol dehydrogenase                                                   | 0               | 2               | 0                | -2.412842           |
| 722  | 59056   | Evc           | Ellis van Creveld gene homolog (human)                                   | 0               | 2               | 0                | -2.411098           |
| 723  | 232791  | Cnot3         | CCR4-NOT transcription complex, subunit 3                                | 0               | 2               | 0                | -2.408721           |
| 724  | 73720   | Cst6          | cystatin E/M                                                             | 0               | 2               | 0                | -2.406904           |
| 725  | 114584  | Clic1         | chloride intracellular channel 1                                         | 0               | 2               | 0                | -2.404797           |
| 726  | 18706   | Pik3ca        | phosphatidylinositol 3-kinase, catalytic, alpha polypeptide              | 0               | 2               | 0                | -2.404268           |
| 727  | 379043  | Raet1e        | retinoic acid early transcript 1E                                        | 0               | 2               | 0                | -2.403622           |
| 728  | 73024   | 2900064A13Rik | RIKEN cDNA 2900064A13 gene                                               | 0               | 2               | 0                | -2.403144           |
| 729  | 229877  | Rap1gds1      | RAP1, GTP-GDP dissociation stimulator 1                                  | 0               | 2               | 0                | -2.400739           |
| 730  | 170936  | Zfp369        | zinc finger protein 369                                                  | 0               | 2               | 0                | -2.398757           |
| 731  | 240215  | Slc4a9        | solute carrier family 4, sodium bicarbonate cotransporter, member 9      | 0               | 2               | 0                | -2.397298           |
| 732  | 238599  | Gm269         | NA                                                                       | 0               | 2               | 0                | -2.396293           |
| 733  | 18952   |               | 39328 septin 4                                                           | 0               | 2               | 0                | -2.395833           |
| 734  | 17901   | Myl1          | myosin, light polypeptide 1                                              | 0               | 2               | 0                | -2.395724           |
| 735  | 17156   | Man1a2        | mannosidase, alpha, class 1A, member 2                                   | 0               | 2               | 0                | -2.395608           |
| 736  | 75764   | Giyd2         | SLX1 structure-specific endonuclease subunit homolog B (S. cerevisiae)   | 0               | 2               | 0                | -2.39425            |
| 737  | 328752  | UNK           | NA                                                                       | 0               | 2               | 0                | -2.39385            |
| 738  | 258755  | Olf1672       | olfactory receptor 672                                                   | 0               | 2               | 0                | -2.393758           |
| 739  | 102436  | Lars2         | leucyl-tRNA synthetase, mitochondrial                                    | 0               | 2               | 0                | -2.393606           |
| 740  | 20259   | Scin          | scinderin                                                                | 0               | 2               | 0                | -2.393139           |
| 741  | 52563   | Cdc23         | CDC23 (cell division cycle 23, yeast, homolog)                           | 0               | 2               | 0                | -2.392604           |
| 742  | 20527   | Slc2a3        | solute carrier family 2 (facilitated glucose transporter), member 3      | 0               | 2               | 0                | -2.388887           |
| 743  | 21953   | Tnni2         | troponin I, skeletal, fast 2                                             | 0               | 2               | 0                | -2.388821           |
| 744  | 13733   | Emr1          | EGF-like module containing, mucin-like, hormone receptor-like sequence 1 | 0               | 2               | 0                | -2.387135           |

## Candidates for positive regulators of normal growth (DESeq)

| Rank | entrez# | Gene Symbol   | Gene name                                                  | enriched shRNAs | depleted shRNAs | no change shRNAs | average Fold Change |
|------|---------|---------------|------------------------------------------------------------|-----------------|-----------------|------------------|---------------------|
| 745  | 52009   | D17Ert441e    | hematological and neurological expressed 1-like            | 0               | 2               | 0                | -2.386317           |
| 746  | 15378   | Hnf4a         | hepatic nuclear factor 4, alpha                            | 0               | 2               | 0                | -2.38602            |
| 747  | 69511   | Klk12         | kallikrein related-peptidase 12                            | 0               | 2               | 0                | -2.385991           |
| 748  | 27078   | Eppb9         | B9 protein domain 1                                        | 0               | 2               | 0                | -2.385513           |
| 749  | 258620  | Olf350        | olfactory receptor 350                                     | 0               | 2               | 0                | -2.384866           |
| 750  | 14291   | Fpr-rs4       | formyl peptide receptor, related sequence 4                | 0               | 2               | 0                | -2.382198           |
| 751  | 13642   | Efnb2         | ephrin B2                                                  | 0               | 2               | 0                | -2.381481           |
| 752  | 224344  | Rbm11         | RNA binding motif protein 11                               | 0               | 2               | 0                | -2.379532           |
| 753  | 69537   | Dnase1l1      | deoxyribonuclease 1-like 1                                 | 0               | 2               | 0                | -2.378549           |
| 754  | 66244   | Sdccag1       | nuclear export mediator factor                             | 0               | 2               | 0                | -2.378434           |
| 755  | 208158  | Map6d1        | MAP6 domain containing 1                                   | 0               | 2               | 0                | -2.37834            |
| 756  | 52855   | Lair1         | leukocyte-associated Ig-like receptor 1                    | 0               | 2               | 0                | -2.378011           |
| 757  | 67427   | Rps20         | ribosomal protein S20                                      | 0               | 2               | 0                | -2.375668           |
| 758  | 24099   | Tnfsf13b      | tumor necrosis factor (ligand) superfamily, member 13b     | 0               | 2               | 0                | -2.375329           |
| 759  | 212862  | Chpt1         | choline phosphotransferase 1                               | 0               | 2               | 0                | -2.374714           |
| 760  | 271639  | Sacy          | adenylate cyclase 10                                       | 0               | 2               | 0                | -2.373421           |
| 761  | 74091   | Npl           | N-acetylneuraminatase pyruvate lyase                       | 0               | 2               | 0                | -2.372327           |
| 762  | 80914   | Uck2          | uridine-cytidine kinase 2                                  | 0               | 2               | 0                | -2.371503           |
| 763  | 227506  | LOC227506     | leukotriene A4 hydrolase pseudogene                        | 0               | 2               | 0                | -2.371148           |
| 764  | 243377  | Svs1          | seminal vesicle secretory protein 1                        | 0               | 2               | 0                | -2.367714           |
| 765  | 22031   | Traf3         | TNF receptor-associated factor 3                           | 0               | 2               | 0                | -2.36717            |
| 766  | 15519   | Hsp90aa1      | heat shock protein 90, alpha (cytosolic), class A member 1 | 0               | 2               | 0                | -2.366468           |
| 767  | 387347  | Tas2r118      | taste receptor, type 2, member 118                         | 0               | 2               | 0                | -2.363026           |
| 768  | 258899  | Olf1214       | olfactory receptor 1214                                    | 0               | 2               | 0                | -2.362045           |
| 769  | 79555   | BC005537      | cDNA sequence BC005537                                     | 0               | 2               | 0                | -2.361891           |
| 770  | 17843   | Mup4          | major urinary protein 4                                    | 0               | 2               | 0                | -2.360882           |
| 771  | 237958  | 4933407P14Rik | RIKEN cDNA 4933407P14 gene                                 | 0               | 2               | 0                | -2.36006            |
| 772  | 384401  | LOC384401     | tubulin, alpha 1A pseudogene                               | 0               | 2               | 0                | -2.359292           |
| 773  | 67684   | 3300001P08Rik | LUC7-like 3 ( <i>S. cerevisiae</i> )                       | 0               | 2               | 0                | -2.358167           |
| 774  | 435267  | UNK           | NA                                                         | 0               | 2               | 0                | -2.357723           |
| 775  | 66708   | Krtap3-2      | keratin associated protein 3-2                             | 0               | 2               | 0                | -2.357227           |
| 776  | 54197   | Rnf5          | ring finger protein 5                                      | 0               | 2               | 0                | -2.356814           |
| 777  | 77980   | Sbf1          | SET binding factor 1                                       | 0               | 2               | 0                | -2.355598           |
| 778  | 210741  | Kcnk12        | potassium channel, subfamily K, member 12                  | 0               | 2               | 0                | -2.354032           |

## Candidates for positive regulators of normal growth (DESeq)

| Rank | entrez# | Gene Symbol   | Gene name                                                            | enriched shRNAs | depleted shRNAs | no change shRNAs | average Fold Change |
|------|---------|---------------|----------------------------------------------------------------------|-----------------|-----------------|------------------|---------------------|
| 779  | 19053   | Ppp2cb        | protein phosphatase 2 (formerly 2A), catalytic subunit, beta isoform | 0               | 2               | 0                | -2.353782           |
| 780  | 240289  | LOC240289     | proteasome (prosome, macropain) subunit, beta type 3 pseudogene      | 0               | 2               | 0                | -2.350961           |
| 781  | 15043   | H2-T3         | histocompatibility 2, T region locus 3                               | 0               | 2               | 0                | -2.350653           |
| 782  | 435233  | UNK           | NA                                                                   | 0               | 2               | 0                | -2.348199           |
| 783  | 217431  | Nol10         | nucleolar protein 10                                                 | 0               | 2               | 0                | -2.347392           |
| 784  | 433822  | UNK           | NA                                                                   | 0               | 2               | 0                | -2.346793           |
| 785  | 83561   | Tdrd1         | tudor domain containing 1                                            | 0               | 2               | 0                | -2.346371           |
| 786  | 239857  | Igsf4d        | cell adhesion molecule 2                                             | 0               | 2               | 0                | -2.346079           |
| 787  | 16367   | Irs1          | insulin receptor substrate 1                                         | 0               | 2               | 0                | -2.344538           |
| 788  | 23879   | Fxr2h         | fragile X mental retardation, autosomal homolog 2                    | 0               | 2               | 0                | -2.343783           |
| 789  | 12966   | Crygc         | crystallin, gamma C                                                  | 0               | 2               | 0                | -2.343511           |
| 790  | 19344   | Rab5b         | RAB5B, member RAS oncogene family                                    | 0               | 2               | 0                | -2.342516           |
| 791  | 11650   | Akp5          | alkaline phosphatase, placental-like 2                               | 0               | 2               | 0                | -2.341532           |
| 792  | 12927   | Bcar1         | breast cancer anti-estrogen resistance 1                             | 0               | 2               | 0                | -2.340023           |
| 793  | 19109   | Prl           | prolactin                                                            | 0               | 2               | 0                | -2.337981           |
| 794  | 11694   | Alx3          | aristaless-like homeobox 3                                           | 0               | 2               | 0                | -2.337291           |
| 795  | 69836   | Pla2g12b      | phospholipase A2, group XIIB                                         | 0               | 2               | 0                | -2.336572           |
| 796  | 26437   | Psg17         | pregnancy specific glycoprotein 17                                   | 0               | 2               | 0                | -2.335388           |
| 797  | 17420   | Mnat1         | menage a trois 1                                                     | 0               | 2               | 0                | -2.333394           |
| 798  | 109225  | Ms4a7         | membrane-spanning 4-domains, subfamily A, member 7                   | 0               | 2               | 0                | -2.330549           |
| 799  | 75871   | 4930566A11Rik | zinc finger protein 821                                              | 0               | 2               | 0                | -2.329258           |
| 800  | 21987   | Tpd52l1       | tumor protein D52-like 1                                             | 0               | 2               | 0                | -2.328552           |
| 801  | 67383   | 2410127L17Rik | RIKEN cDNA 2410127L17 gene                                           | 0               | 2               | 0                | -2.325926           |
| 802  | 67254   | 2900011O08Rik | RIKEN cDNA 2900011O08 gene                                           | 0               | 2               | 0                | -2.325503           |
| 803  | 22696   | Zfp37         | zinc finger protein 37                                               | 0               | 2               | 0                | -2.324266           |
| 804  | 16549   | Khsrp         | KH-type splicing regulatory protein                                  | 0               | 2               | 0                | -2.322718           |
| 805  | 15415   | Hoxb7         | homeobox B7                                                          | 0               | 2               | 0                | -2.322453           |
| 806  | 73866   | 4930432H15Rik | family with sequence similarity 122, member C                        | 0               | 2               | 0                | -2.321276           |
| 807  | 140917  | Dclre1b       | DNA cross-link repair 1B, PSO2 homolog (S. cerevisiae)               | 0               | 2               | 0                | -2.319514           |
| 808  | 66556   | Drap1         | Dr1 associated protein 1 (negative cofactor 2 alpha)                 | 0               | 2               | 0                | -2.319097           |
| 809  | 59013   | Hnrph1        | heterogeneous nuclear ribonucleoprotein H1                           | 0               | 2               | 0                | -2.318142           |
| 810  | 228960  | Stx16         | syntaxin 16                                                          | 0               | 2               | 0                | -2.318077           |
| 811  | 93970   | Klra18        | killer cell lectin-like receptor, subfamily A, member 18             | 0               | 2               | 0                | -2.317841           |
| 812  | 11793   | Atg5          | autophagy-related 5 (yeast)                                          | 0               | 2               | 0                | -2.316339           |

## Candidates for positive regulators of normal growth (DESeq)

| Rank | entrez# | Gene Symbol   | Gene name                                                                                                     | enriched shRNAs | depleted shRNAs | no change shRNAs | average Fold Change |
|------|---------|---------------|---------------------------------------------------------------------------------------------------------------|-----------------|-----------------|------------------|---------------------|
| 813  | 68032   | Tmem85        | transmembrane protein 85                                                                                      | 0               | 2               | 0                | -2.315806           |
| 814  | 67425   | Eps8l1        | EPS8-like 1                                                                                                   | 0               | 2               | 0                | -2.315405           |
| 815  | 81011   | V1rd14        | vomeronasal 1 receptor 148                                                                                    | 0               | 2               | 0                | -2.313612           |
| 816  | 17138   | Magea2        | melanoma antigen, family A, 2                                                                                 | 0               | 2               | 0                | -2.313606           |
| 817  | 99738   | Kcnc4         | potassium voltage gated channel, Shaw-related subfamily, member 4                                             | 0               | 2               | 0                | -2.312506           |
| 818  | 94043   | Tm2d1         | TM2 domain containing 1                                                                                       | 0               | 2               | 0                | -2.312299           |
| 819  | 20585   | Smarca3       | helicase-like transcription factor                                                                            | 0               | 2               | 0                | -2.311629           |
| 820  | 383100  | UNK           | NA                                                                                                            | 0               | 2               | 0                | -2.310594           |
| 821  | 53857   | Tuba8         | tubulin, alpha 8                                                                                              | 0               | 2               | 0                | -2.308704           |
| 822  | 18749   | Prkacb        | protein kinase, cAMP dependent, catalytic, beta                                                               | 0               | 2               | 0                | -2.306923           |
| 823  | 81701   | Egfl8         | EGF-like domain 8                                                                                             | 0               | 2               | 0                | -2.304198           |
| 824  | 13197   | Gadd45a       | growth arrest and DNA-damage-inducible 45 alpha                                                               | 0               | 2               | 0                | -2.30368            |
| 825  | 13684   | Eif4e         | eukaryotic translation initiation factor 4E                                                                   | 0               | 2               | 0                | -2.301428           |
| 826  | 258351  | OlfR633       | olfactory receptor 633                                                                                        | 0               | 2               | 0                | -2.301121           |
| 827  | 18139   | Zfml          | zinc finger, matrin-like                                                                                      | 0               | 2               | 0                | -2.301072           |
| 828  | 258374  | OlfR127       | olfactory receptor 127                                                                                        | 0               | 2               | 0                | -2.299874           |
| 829  | 238323  | Rps6kl1       | ribosomal protein S6 kinase-like 1                                                                            | 0               | 2               | 0                | -2.298469           |
| 830  | 78689   | Mak10         | N(alpha)-acetyltransferase 35, NatC auxiliary subunit                                                         | 0               | 2               | 0                | -2.298138           |
| 831  | 22629   | Ywhah         | tyrosine 3-monooxygenase/tryptophan 5-monooxygenase activation protein, eta polypeptide                       | 0               | 2               | 0                | -2.297904           |
| 832  | 216440  | 4632413K17Rik | amplified in osteosarcoma                                                                                     | 0               | 2               | 0                | -2.294412           |
| 833  | 214580  | Pstk          | phosphoseryl-tRNA kinase                                                                                      | 0               | 2               | 0                | -2.294228           |
| 834  | 434655  | UNK           | NA                                                                                                            | 0               | 2               | 0                | -2.293306           |
| 835  | 18033   | Nfkb1         | nuclear factor of kappa light polypeptide gene enhancer in B cells 1, p105                                    | 0               | 2               | 0                | -2.292926           |
| 836  | 19170   | Psbm1         | proteasome (prosome, macropain) subunit, beta type 1                                                          | 0               | 2               | 0                | -2.292674           |
| 837  | 219131  | Phf11         | PHD finger protein 11                                                                                         | 0               | 2               | 0                | -2.292534           |
| 838  | 71889   | Epn3          | epsin 3                                                                                                       | 0               | 2               | 0                | -2.291717           |
| 839  | 19215   | Ptgds         | prostaglandin D2 synthase (brain)                                                                             | 0               | 2               | 0                | -2.290846           |
| 840  | 237847  | Rtn4r1l       | reticulon 4 receptor-like 1                                                                                   | 0               | 2               | 0                | -2.289847           |
| 841  | 67054   | Paics         | phosphoribosylaminoimidazole carboxylase, phosphoribosylaminoribosylaminoimidazole, succinocarboxylase        | 0               | 2               | 0                | -2.289807           |
| 842  | 215708  | C030011O14Rik | family with sequence similarity 73, member A                                                                  | 0               | 2               | 0                | -2.287955           |
| 843  | 26938   | St6galnac5    | ST6 (alpha-N-acetyl-neuraminyl-2,3-beta-galactosyl-1,3)-N-acetylgalactosaminide alpha-2,6-sialyltransferase 5 | 0               | 2               | 0                | -2.286298           |
| 844  | 73287   | 1700040L02Rik | RIKEN cDNA 1700040L02 gene                                                                                    | 0               | 2               | 0                | -2.284588           |
| 845  | 101613  | Nalp6         | NLR family, pyrin domain containing 6                                                                         | 0               | 2               | 0                | -2.284312           |
| 846  | 76804   | Jmjd2c        | lysine (K)-specific demethylase 4C                                                                            | 0               | 2               | 0                | -2.284231           |

## Candidates for positive regulators of normal growth (DESeq)

| Rank | entrez# | Gene Symbol   | Gene name                                                              | enriched shRNAs | depleted shRNAs | no change shRNAs | average Fold Change |
|------|---------|---------------|------------------------------------------------------------------------|-----------------|-----------------|------------------|---------------------|
| 847  | 380660  | 8430416H19Rik | acyl-CoA synthetase short-chain family member 3                        | 0               | 2               | 0                | -2.28274            |
| 848  | 83453   | Chrdl1        | chordin-like 1                                                         | 0               | 2               | 0                | -2.280138           |
| 849  | 93877   | Pcdhb6        | protocadherin beta 6                                                   | 0               | 2               | 0                | -2.277842           |
| 850  | 12286   | Cacna1a       | calcium channel, voltage-dependent, P/Q type, alpha 1A subunit         | 0               | 2               | 0                | -2.277242           |
| 851  | 67414   | Mfn1          | mitofusin 1                                                            | 0               | 2               | 0                | -2.276182           |
| 852  | 94186   | Strn3         | striatin, calmodulin binding protein 3                                 | 0               | 2               | 0                | -2.275768           |
| 853  | 78444   | C330024D12Rik | pyroglutamyl-peptidase I-like                                          | 0               | 2               | 0                | -2.271903           |
| 854  | 12235   | Bub1          | budding uninhibited by benzimidazoles 1 homolog (S. cerevisiae)        | 0               | 2               | 0                | -2.271003           |
| 855  | 17089   | Lyar          | Ly1 antibody reactive clone                                            | 0               | 2               | 0                | -2.269014           |
| 856  | 21835   | Thrsp         | thyroid hormone responsive SPOT14 homolog (Rattus)                     | 0               | 2               | 0                | -2.267245           |
| 857  | 66437   | Fis1          | fission 1 (mitochondrial outer membrane) homolog (yeast)               | 0               | 2               | 0                | -2.264921           |
| 858  | 106200  | Txndc11       | thioredoxin domain containing 11                                       | 0               | 2               | 0                | -2.264562           |
| 859  | 72047   | Ddx42         | DEAD (Asp-Glu-Ala-Asp) box polypeptide 42                              | 0               | 2               | 0                | -2.261701           |
| 860  | 170737  | Znrf1         | zinc and ring finger 1                                                 | 0               | 2               | 0                | -2.257283           |
| 861  | 16467   | Atcay         | ataxia, cerebellar, Cayman type homolog (human)                        | 0               | 2               | 0                | -2.257001           |
| 862  | 209815  | Oat11         | TBC1 domain family, member 25                                          | 0               | 2               | 0                | -2.256844           |
| 863  | 381038  | Parl          | presenilin associated, rhomboid-like                                   | 0               | 2               | 0                | -2.255322           |
| 864  | 56642   | Ankrd2        | ankyrin repeat domain 2 (stretch responsive muscle)                    | 0               | 2               | 0                | -2.254006           |
| 865  | 20737   | Spn           | sialophorin                                                            | 0               | 2               | 0                | -2.250974           |
| 866  | 258446  | Olf1231       | olfactory receptor 1231                                                | 0               | 2               | 0                | -2.249987           |
| 867  | 381530  | MGC107671     | major urinary protein 20                                               | 0               | 2               | 0                | -2.248681           |
| 868  | 13615   | Edn2          | endothelin 2                                                           | 0               | 2               | 0                | -2.247674           |
| 869  | 12465   | Cct5          | chaperonin containing Tcp1, subunit 5 (epsilon)                        | 0               | 2               | 0                | -2.247398           |
| 870  | 68267   | Slc25a22      | solute carrier family 25 (mitochondrial carrier, glutamate), member 22 | 0               | 2               | 0                | -2.246931           |
| 871  | 211924  | Dsg1c         | desmoglein 1 gamma                                                     | 0               | 2               | 0                | -2.244372           |
| 872  | 20623   | Snrk          | SNF related kinase                                                     | 0               | 2               | 0                | -2.244096           |
| 873  | 15426   | Hoxc8         | homeobox C8                                                            | 0               | 2               | 0                | -2.243623           |
| 874  | 68183   | Bcas2         | breast carcinoma amplified sequence 2                                  | 0               | 2               | 0                | -2.243454           |
| 875  | 72978   | Cnih3         | cornichon homolog 3 (Drosophila)                                       | 0               | 2               | 0                | -2.243291           |
| 876  | 24117   | Wif1          | Wnt inhibitory factor 1                                                | 0               | 2               | 0                | -2.242546           |
| 877  | 106389  | Eaf2          | ELL associated factor 2                                                | 0               | 2               | 0                | -2.241586           |
| 878  | 73656   | Ms4a6c        | membrane-spanning 4-domains, subfamily A, member 6C                    | 0               | 2               | 0                | -2.241445           |
| 879  | 53945   | Slc40a1       | solute carrier family 40 (iron-regulated transporter), member 1        | 0               | 2               | 0                | -2.241181           |
| 880  | 74121   | Acox1         | acyl-Coenzyme A oxidase-like                                           | 0               | 2               | 0                | -2.240866           |

## Candidates for positive regulators of normal growth (DESeq)

| Rank | entrez# | Gene Symbol   | Gene name                                                                    | enriched shRNAs | depleted shRNAs | no change shRNAs | average Fold Change |
|------|---------|---------------|------------------------------------------------------------------------------|-----------------|-----------------|------------------|---------------------|
| 881  | 67015   | Ccdc91        | coiled-coil domain containing 91                                             | 0               | 2               | 0                | -2.239915           |
| 882  | 26374   | Rfwd2         | ring finger and WD repeat domain 2                                           | 0               | 2               | 0                | -2.238602           |
| 883  | 17380   | Mme           | membrane metallo endopeptidase                                               | 0               | 2               | 0                | -2.237272           |
| 884  | 269997  | 6430604K15Rik | zinc finger protein 747                                                      | 0               | 2               | 0                | -2.236938           |
| 885  | 225341  | Lims2         | LIM and senescent cell antigen like domains 2                                | 0               | 2               | 0                | -2.236916           |
| 886  | 114142  | Foxp2         | forkhead box P2                                                              | 0               | 2               | 0                | -2.23589            |
| 887  | 66433   | Chchd7        | coiled-coil-helix-coiled-coil-helix domain containing 7                      | 0               | 2               | 0                | -2.235668           |
| 888  | 64450   | Gpr85         | G protein-coupled receptor 85                                                | 0               | 2               | 0                | -2.234418           |
| 889  | 52683   | D15Ert785e    | non-SMC condensin II complex, subunit H2                                     | 0               | 2               | 0                | -2.233668           |
| 890  | 68135   | Eif3s3        | eukaryotic translation initiation factor 3, subunit H                        | 0               | 2               | 0                | -2.231757           |
| 891  | 97440   | C76566        | UDP-GlcNAc:betaGal beta-1,3-N-acetylglucosaminyltransferase 9, pseudogene    | 0               | 2               | 0                | -2.231713           |
| 892  | 113858  | V1rc1         | vomer nasal 1 receptor 10                                                    | 0               | 2               | 0                | -2.230897           |
| 893  | 14043   | Ext2          | exostoses (multiple) 2                                                       | 0               | 2               | 0                | -2.230674           |
| 894  | 66066   | Gng11         | guanine nucleotide binding protein (G protein), gamma 11                     | 0               | 2               | 0                | -2.230627           |
| 895  | 66401   | Nudt2         | nudix (nucleoside diphosphate linked moiety X)-type motif 2                  | 0               | 2               | 0                | -2.230195           |
| 896  | 56040   | Rplp1         | ribosomal protein, large, P1                                                 | 0               | 2               | 0                | -2.229292           |
| 897  | 19921   | Rpl19         | ribosomal protein L19                                                        | 0               | 2               | 0                | -2.226051           |
| 898  | 78416   | Rnase6        | ribonuclease, RNase A family, 6                                              | 0               | 2               | 0                | -2.225435           |
| 899  | 386042  | LOC386042     | NA                                                                           | 0               | 2               | 0                | -2.223403           |
| 900  | 56189   | Prodh2        | proline dehydrogenase (oxidase) 2                                            | 0               | 2               | 0                | -2.222513           |
| 901  | 12557   | Cdh17         | cadherin 17                                                                  | 0               | 2               | 0                | -2.222262           |
| 902  | 245537  | Nlgn3         | neuroligin 3                                                                 | 0               | 2               | 0                | -2.220427           |
| 903  | 268759  | 9930012K11Rik | RIKEN cDNA 9930012K11 gene                                                   | 0               | 2               | 0                | -2.218709           |
| 904  | 18109   | Mycn          | v-myc myelocytomatosis viral related oncogene, neuroblastoma derived (avian) | 0               | 2               | 0                | -2.217686           |
| 905  | 258271  | Olf1311       | olfactory receptor 1311                                                      | 0               | 2               | 0                | -2.216896           |
| 906  | 235028  | Zfp426        | zinc finger protein 426                                                      | 0               | 2               | 0                | -2.216892           |
| 907  | 104156  | Etv5          | ets variant gene 5                                                           | 0               | 2               | 0                | -2.216329           |
| 908  | 381937  | LOC381937     | predicted gene 5157                                                          | 0               | 2               | 0                | -2.215746           |
| 909  | 27369   | Dguok         | deoxyguanosine kinase                                                        | 0               | 2               | 0                | -2.215603           |
| 910  | 18557   | Pctk3         | cyclin-dependent kinase 18                                                   | 0               | 2               | 0                | -2.215542           |
| 911  | 238463  | Tubal3        | tubulin, alpha-like 3                                                        | 0               | 2               | 0                | -2.214013           |
| 912  | 246196  | Zfp277        | zinc finger protein 277                                                      | 0               | 2               | 0                | -2.213925           |
| 913  | 22186   | Uba52         | ubiquitin A-52 residue ribosomal protein fusion product 1                    | 0               | 2               | 0                | -2.210689           |
| 914  | 27756   | Lsm2          | LSM2 homolog, U6 small nuclear RNA associated (S. cerevisiae)                | 0               | 2               | 0                | -2.210293           |

## Candidates for positive regulators of normal growth (DESeq)

| Rank | entrez# | Gene Symbol   | Gene name                                                                           | enriched shRNAs | depleted shRNAs | no change shRNAs | average Fold Change |
|------|---------|---------------|-------------------------------------------------------------------------------------|-----------------|-----------------|------------------|---------------------|
| 915  | 280668  | Adam1a        | a disintegrin and metallopeptidase domain 1a                                        | 0               | 2               | 0                | -2.209767           |
| 916  | 117005  | Olf74         | olfactory receptor 74                                                               | 0               | 2               | 0                | -2.208155           |
| 917  | 214968  | Sema6d        | sema domain, transmembrane domain (TM), and cytoplasmic domain, (semaphorin) 6D     | 0               | 2               | 0                | -2.206633           |
| 918  | 12741   | Cldn5         | claudin 5                                                                           | 0               | 2               | 0                | -2.206526           |
| 919  | 235587  | Parp3         | poly (ADP-ribose) polymerase family, member 3                                       | 0               | 2               | 0                | -2.203931           |
| 920  | 18174   | Slc11a2       | solute carrier family 11 (proton-coupled divalent metal ion transporters), member 2 | 0               | 2               | 0                | -2.203916           |
| 921  | 385052  | UNK           | NA                                                                                  | 0               | 2               | 0                | -2.203531           |
| 922  | 56389   | Stx5a         | syntaxin 5A                                                                         | 0               | 2               | 0                | -2.202198           |
| 923  | 259151  | Olf1037       | olfactory receptor 1037                                                             | 0               | 2               | 0                | -2.201618           |
| 924  | 17169   | Mark3         | MAP/microtubule affinity-regulating kinase 3                                        | 0               | 2               | 0                | -2.20098            |
| 925  | 545471  | LOC545471     | zinc finger protein 345                                                             | 0               | 2               | 0                | -2.194432           |
| 926  | 30055   | Timm13        | translocase of inner mitochondrial membrane 13 homolog (yeast)                      | 0               | 2               | 0                | -2.193651           |
| 927  | 13681   | Eif4a1        | eukaryotic translation initiation factor 4A1                                        | 0               | 2               | 0                | -2.193525           |
| 928  | 12070   | Ngfrap1       | nerve growth factor receptor (TNFRSF16) associated protein 1                        | 0               | 2               | 0                | -2.190452           |
| 929  | 73747   | 1110034G24Rik | RIKEN cDNA 1110034G24 gene                                                          | 0               | 2               | 0                | -2.190162           |
| 930  | 50540   | Iggbp1b       | immunoglobulin (CD79A) binding protein 1b                                           | 0               | 2               | 0                | -2.189684           |
| 931  | 67877   | Nat5          | N(alpha)-acetyltransferase 20, NatB catalytic subunit                               | 0               | 2               | 0                | -2.189037           |
| 932  | 99683   | Sec24b        | Sec24 related gene family, member B ( <i>S. cerevisiae</i> )                        | 0               | 2               | 0                | -2.188108           |
| 933  | 58226   | Cacna1h       | calcium channel, voltage-dependent, T type, alpha 1H subunit                        | 0               | 2               | 0                | -2.187134           |
| 934  | 22698   | Zfp39         | zinc finger protein 39                                                              | 0               | 2               | 0                | -2.186879           |
| 935  | 329738  | 4921525H12Rik | AKNA domain containing 1                                                            | 0               | 2               | 0                | -2.18529            |
| 936  | 16165   | Il13ra2       | interleukin 13 receptor, alpha 2                                                    | 0               | 2               | 0                | -2.184841           |
| 937  | 278304  | A930006D11Rik | zinc finger protein 385C                                                            | 0               | 2               | 0                | -2.183616           |
| 938  | 12929   | Crkl          | v-crk sarcoma virus CT10 oncogene homolog (avian)-like                              | 0               | 2               | 0                | -2.183544           |
| 939  | 228858  | Gdap111       | ganglioside-induced differentiation-associated protein 1-like 1                     | 0               | 2               | 0                | -2.182494           |
| 940  | 14860   | Gsta4         | glutathione S-transferase, alpha 4                                                  | 0               | 2               | 0                | -2.181541           |
| 941  | 238384  | Slc24a4       | solute carrier family 24 (sodium/potassium/calcium exchanger), member 4             | 0               | 2               | 0                | -2.181178           |
| 942  | 75221   | Dpp3          | dipeptidylpeptidase 3                                                               | 0               | 2               | 0                | -2.180097           |
| 943  | 68401   | G6pc3         | glucose 6 phosphatase, catalytic, 3                                                 | 0               | 2               | 0                | -2.179637           |
| 944  | 231506  | A1461788      | lin-54 homolog ( <i>C. elegans</i> )                                                | 0               | 2               | 0                | -2.178226           |
| 945  | 16616   | Klk1b21       | kallikrein 1-related peptidase b21                                                  | 0               | 2               | 0                | -2.178121           |
| 946  | 245619  | UNK           | NA                                                                                  | 0               | 2               | 0                | -2.177817           |
| 947  | 105355  | Slc17a3       | solute carrier family 17 (sodium phosphate), member 3                               | 0               | 2               | 0                | -2.177138           |
| 948  | 67618   | Aasdhppt      | aminoadipate-semialdehyde dehydrogenase-phosphopantetheinyl transferase             | 0               | 2               | 0                | -2.17709            |



## Candidates for positive regulators of normal growth (DESeq)

| Rank | entrez# | Gene Symbol   | Gene name                                                                       | enriched shRNAs | depleted shRNAs | no change shRNAs | average Fold Change |
|------|---------|---------------|---------------------------------------------------------------------------------|-----------------|-----------------|------------------|---------------------|
| 949  | 66950   | 2310028N02Rik | transmembrane protein 206                                                       | 0               | 2               | 0                | -2.173511           |
| 950  | 17454   | Mov10         | Moloney leukemia virus 10                                                       | 0               | 2               | 0                | -2.172416           |
| 951  | 12461   | Cct2          | chaperonin containing Tcp1, subunit 2 (beta)                                    | 0               | 2               | 0                | -2.171589           |
| 952  | 19089   | Prkcsh        | protein kinase C substrate 80K-H                                                | 0               | 2               | 0                | -2.171243           |
| 953  | 12009   | Azi1          | 5-azacytidine induced gene 1                                                    | 0               | 2               | 0                | -2.170181           |
| 954  | 68816   | Ppil1         | peptidylprolyl isomerase (cyclophilin)-like 1                                   | 0               | 2               | 0                | -2.169011           |
| 955  | 70425   | Csnk1g3       | casein kinase 1, gamma 3                                                        | 0               | 2               | 0                | -2.168766           |
| 956  | 13018   | Ctcf          | CCCTC-binding factor                                                            | 0               | 2               | 0                | -2.168681           |
| 957  | 217653  | C79407        | MIS18 binding protein 1                                                         | 0               | 2               | 0                | -2.167571           |
| 958  | 109331  | Rnf20         | ring finger protein 20                                                          | 0               | 2               | 0                | -2.16646            |
| 959  | 383458  | UNK           | NA                                                                              | 0               | 2               | 0                | -2.166346           |
| 960  | 319615  | 6330416L07Rik | zinc finger protein 944                                                         | 0               | 2               | 0                | -2.16449            |
| 961  | 230623  | A630098G03Rik | selection and upkeep of intraepithelial T cells 11                              | 0               | 2               | 0                | -2.164381           |
| 962  | 19944   | Rpl29         | ribosomal protein L29                                                           | 0               | 2               | 0                | -2.164031           |
| 963  | 13909   | LOC13909      | carboxylesterase 3B                                                             | 0               | 2               | 0                | -2.163902           |
| 964  | 22164   | Tnfsf4        | tumor necrosis factor (ligand) superfamily, member 4                            | 0               | 2               | 0                | -2.163158           |
| 965  | 353328  | Muc6          | mucin 6, gastric                                                                | 0               | 2               | 0                | -2.162063           |
| 966  | 67623   | Tm7sf3        | transmembrane 7 superfamily member 3                                            | 0               | 2               | 0                | -2.161288           |
| 967  | 19941   | Rpl26         | ribosomal protein L26                                                           | 0               | 2               | 0                | -2.161138           |
| 968  | 16173   | Il18          | interleukin 18                                                                  | 0               | 2               | 0                | -2.160133           |
| 969  | 224661  | Slc26a8       | solute carrier family 26, member 8                                              | 0               | 2               | 0                | -2.160131           |
| 970  | 104111  | Adcy3         | adenylate cyclase 3                                                             | 0               | 2               | 0                | -2.159585           |
| 971  | 20018   | Rpo1-3        | polymerase (RNA) I polypeptide D                                                | 0               | 2               | 0                | -2.158531           |
| 972  | 26908   | Eif2s3y       | eukaryotic translation initiation factor 2, subunit 3, structural gene Y-linked | 0               | 2               | 0                | -2.157954           |
| 973  | 18148   | Npm1          | nucleophosmin 1                                                                 | 0               | 2               | 0                | -2.157686           |
| 974  | 104112  | Acly          | ATP citrate lyase                                                               | 0               | 2               | 0                | -2.157008           |
| 975  | 100198  | H6pd          | hexose-6-phosphate dehydrogenase (glucose 1-dehydrogenase)                      | 0               | 2               | 0                | -2.156452           |
| 976  | 73534   | 1700082M22Rik | RIKEN cDNA 1700082M22 gene                                                      | 0               | 2               | 0                | -2.155167           |
| 977  | 241175  | C230078M14Rik | contactin associated protein-like 5B                                            | 0               | 2               | 0                | -2.154611           |
| 978  | 69930   | Zfp715        | zinc finger protein 715                                                         | 0               | 2               | 0                | -2.154586           |
| 979  | 11491   | Adam17        | a disintegrin and metallopeptidase domain 17                                    | 0               | 2               | 0                | -2.152957           |
| 980  | 259279  | Tubgcp3       | tubulin, gamma complex associated protein 3                                     | 0               | 2               | 0                | -2.152885           |
| 981  | 71735   | 1200011O22Rik | leucine-rich repeats and WD repeat domain containing 1                          | 0               | 2               | 0                | -2.151369           |
| 982  | 14915   | Guca2a        | guanylate cyclase activator 2a (guanylin)                                       | 0               | 2               | 0                | -2.150792           |

## Candidates for positive regulators of normal growth (DESeq)

| Rank | entrez# | Gene Symbol   | Gene name                                                                               | enriched shRNAs | depleted shRNAs | no change shRNAs | average Fold Change |
|------|---------|---------------|-----------------------------------------------------------------------------------------|-----------------|-----------------|------------------|---------------------|
| 983  | 433839  | LOC433839     | NA                                                                                      | 0               | 2               | 0                | -2.149718           |
| 984  | 22143   | Tuba2         | tubulin, alpha 1B                                                                       | 0               | 2               | 0                | -2.148613           |
| 985  | 545013  | LOC545013     | predicted gene 5797                                                                     | 0               | 2               | 0                | -2.148397           |
| 986  | 12623   | Ces1          | carboxylesterase 1G                                                                     | 0               | 2               | 0                | -2.147192           |
| 987  | 69731   | Gemin7        | gem (nuclear organelle) associated protein 7                                            | 0               | 2               | 0                | -2.146735           |
| 988  | 17381   | Mmp12         | matrix metalloproteinase 12                                                             | 0               | 2               | 0                | -2.146188           |
| 989  | 21899   | Tlr6          | toll-like receptor 6                                                                    | 0               | 2               | 0                | -2.145591           |
| 990  | 233877  | Kctd13        | potassium channel tetramerisation domain containing 13                                  | 0               | 2               | 0                | -2.144626           |
| 991  | 223732  | Ldoc1l        | leucine zipper, down-regulated in cancer 1-like                                         | 0               | 2               | 0                | -2.144086           |
| 992  | 100088  | Rcc1          | regulator of chromosome condensation 1                                                  | 0               | 2               | 0                | -2.143934           |
| 993  | 195434  | Utp14b        | UTP14, U3 small nucleolar ribonucleoprotein, homolog B (yeast)                          | 0               | 2               | 0                | -2.143552           |
| 994  | 73473   | Iws1          | IWS1 homolog ( <i>S. cerevisiae</i> )                                                   | 0               | 2               | 0                | -2.14284            |
| 995  | 14600   | Ghr           | growth hormone receptor                                                                 | 0               | 2               | 0                | -2.142707           |
| 996  | 52377   | Rcn3          | reticulocalbin 3, EF-hand calcium binding domain                                        | 0               | 2               | 0                | -2.142568           |
| 997  | 381806  | LOC381806     | murinoglobulin pseudogene                                                               | 0               | 2               | 0                | -2.14208            |
| 998  | 101314  | 6720456B07Rik | RIKEN cDNA 6720456B07 gene                                                              | 0               | 2               | 0                | -2.141999           |
| 999  | 382985  | Rrm2b         | ribonucleotide reductase M2 B (TP53 inducible)                                          | 0               | 2               | 0                | -2.141566           |
| 1000 | 26893   | Cops6         | COP9 (constitutive photomorphogenic) homolog, subunit 6 ( <i>Arabidopsis thaliana</i> ) | 0               | 2               | 0                | -2.14039            |
| 1001 | 52163   | Camk1         | calcium/calmodulin-dependent protein kinase I                                           | 0               | 2               | 0                | -2.140273           |
| 1002 | 93734   | Mpv17l        | Mpv17 transgene, kidney disease mutant-like                                             | 0               | 2               | 0                | -2.139896           |
| 1003 | 213649  | Arhgef19      | Rho guanine nucleotide exchange factor (GEF) 19                                         | 0               | 2               | 0                | -2.138212           |
| 1004 | 16582   | Kifc3         | kinesin family member C3                                                                | 0               | 2               | 0                | -2.137993           |
| 1005 | 93967   | Klra20        | killer cell lectin-like receptor subfamily A, member 20                                 | 0               | 2               | 0                | -2.137399           |
| 1006 | 71355   | Col24a1       | collagen, type XXIV, alpha 1                                                            | 0               | 2               | 0                | -2.136645           |
| 1007 | 319513  | A930025D01Rik | family with sequence similarity 113, member A                                           | 0               | 2               | 0                | -2.136142           |
| 1008 | 112406  | Egln2         | EGL nine homolog 2 ( <i>C. elegans</i> )                                                | 0               | 2               | 0                | -2.13476            |
| 1009 | 12965   | Crygb         | crystallin, gamma B                                                                     | 0               | 2               | 0                | -2.134094           |
| 1010 | 19711   | Resp18        | regulated endocrine-specific protein 18                                                 | 0               | 2               | 0                | -2.133614           |
| 1011 | 11517   | Adcyap1r1     | adenylate cyclase activating polypeptide 1 receptor 1                                   | 0               | 2               | 0                | -2.131955           |
| 1012 | 99982   | Aof2          | lysine (K)-specific demethylase 1A                                                      | 0               | 2               | 0                | -2.131911           |
| 1013 | 78330   | 1500032D16Rik | NADH dehydrogenase (ubiquinone) flavoprotein 3                                          | 0               | 2               | 0                | -2.131318           |
| 1014 | 14538   | Gcnt2         | glucosaminyl (N-acetyl) transferase 2, I-branching enzyme                               | 0               | 2               | 0                | -2.130684           |
| 1015 | 29873   | Cspg5         | chondroitin sulfate proteoglycan 5                                                      | 0               | 2               | 0                | -2.129585           |
| 1016 | 18195   | Nsf           | N-ethylmaleimide sensitive fusion protein                                               | 0               | 2               | 0                | -2.129434           |

## Candidates for positive regulators of normal growth (DESeq)

| Rank | entrez# | Gene Symbol   | Gene name                                                                                | enriched shRNAs | depleted shRNAs | no change shRNAs | average Fold Change |
|------|---------|---------------|------------------------------------------------------------------------------------------|-----------------|-----------------|------------------|---------------------|
| 1017 | 17936   | Nab1          | Ngfi-A binding protein 1                                                                 | 0               | 2               | 0                | -2.129423           |
| 1018 | 77733   | Rnf170        | ring finger protein 170                                                                  | 0               | 2               | 0                | -2.127657           |
| 1019 | 19111   | Prlpb         | prolactin family 6, subfamily a, member 1                                                | 0               | 2               | 0                | -2.125664           |
| 1020 | 259095  | Olfir568      | olfactory receptor 568                                                                   | 0               | 2               | 0                | -2.125493           |
| 1021 | 71448   | Tmem80        | transmembrane protein 80                                                                 | 0               | 2               | 0                | -2.124662           |
| 1022 | 72088   | Ush1c         | Usher syndrome 1C homolog (human)                                                        | 0               | 2               | 0                | -2.12361            |
| 1023 | 53951   | 2310002B06Rik | coiled-coil domain containing 75                                                         | 0               | 2               | 0                | -2.122183           |
| 1024 | 12983   | Csf2rb1       | colony stimulating factor 2 receptor, beta, low-affinity (granulocyte-macrophage)        | 0               | 2               | 0                | -2.122143           |
| 1025 | 56455   | Dynll1        | dynein light chain LC8-type 1                                                            | 0               | 2               | 0                | -2.121814           |
| 1026 | 14687   | Gnaz          | guanine nucleotide binding protein, alpha z subunit                                      | 0               | 2               | 0                | -2.119972           |
| 1027 | 432738  | UNK           | NA                                                                                       | 0               | 2               | 0                | -2.119302           |
| 1028 | 56505   | Ruvbl1        | RuvB-like protein 1                                                                      | 0               | 2               | 0                | -2.117449           |
| 1029 | 19982   | Rpl36a        | ribosomal protein L36A                                                                   | 0               | 2               | 0                | -2.117309           |
| 1030 | 12561   | Cdh4          | cadherin 4                                                                               | 0               | 2               | 0                | -2.117036           |
| 1031 | 380785  | BM948371      | brain-enriched guanylate kinase-associated                                               | 0               | 2               | 0                | -2.116738           |
| 1032 | 229541  | Dennd4b       | DENN/MADD domain containing 4B                                                           | 0               | 2               | 0                | -2.116543           |
| 1033 | 20589   | Ighmbp2       | immunoglobulin mu binding protein 2                                                      | 0               | 2               | 0                | -2.116542           |
| 1034 | 192653  | BC021608      | tetratricopeptide repeat domain 36                                                       | 0               | 2               | 0                | -2.115779           |
| 1035 | 56208   | Becn1         | beclin 1, autophagy related                                                              | 0               | 2               | 0                | -2.114863           |
| 1036 | 65086   | Edg7          | lysophosphatidic acid receptor 3                                                         | 0               | 2               | 0                | -2.114567           |
| 1037 | 232619  | UNK           | NA                                                                                       | 0               | 2               | 0                | -2.11361            |
| 1038 | 70481   | Pnma1         | paraneoplastic antigen MA1                                                               | 0               | 2               | 0                | -2.11237            |
| 1039 | 22632   | Yy1           | YY1 transcription factor                                                                 | 0               | 2               | 0                | -2.11205            |
| 1040 | 14803   | Grid1         | glutamate receptor, ionotropic, delta 1                                                  | 0               | 2               | 0                | -2.110074           |
| 1041 | 21859   | Timp3         | tissue inhibitor of metalloproteinase 3                                                  | 0               | 2               | 0                | -2.108394           |
| 1042 | 68549   | Sgol2         | shugoshin-like 2 (S. pombe)                                                              | 0               | 2               | 0                | -2.10806            |
| 1043 | 69681   | Cdk3          | cyclin-dependent kinase 3, pseudogene                                                    | 0               | 2               | 0                | -2.106862           |
| 1044 | 225825  | Cd226         | CD226 antigen                                                                            | 0               | 2               | 0                | -2.106415           |
| 1045 | 16912   | Psmb9         | proteasome (prosome, macropain) subunit, beta type 9 (large multifunctional peptidase 2) | 0               | 2               | 0                | -2.104628           |
| 1046 | 11546   | Parp2         | poly (ADP-ribose) polymerase family, member 2                                            | 0               | 2               | 0                | -2.104248           |
| 1047 | 407823  | Baz2b         | bromodomain adjacent to zinc finger domain, 2B                                           | 0               | 2               | 0                | -2.104126           |
| 1048 | 69732   | 2410018L13Rik | RIKEN cDNA 2410018L13 gene                                                               | 0               | 2               | 0                | -2.103947           |
| 1049 | 235047  | BB114266      | zinc finger protein 809                                                                  | 0               | 2               | 0                | -2.101991           |
| 1050 | 67922   | 2510049I19Rik | family with sequence similarity 32, member A                                             | 0               | 2               | 0                | -2.101964           |

## Candidates for positive regulators of normal growth (DESeq)

| Rank | entrez# | Gene Symbol   | Gene name                                                                                | enriched shRNAs | depleted shRNAs | no change shRNAs | average Fold Change |
|------|---------|---------------|------------------------------------------------------------------------------------------|-----------------|-----------------|------------------|---------------------|
| 1051 | 243529  | H1fx          | H1 histone family, member X                                                              | 0               | 2               | 0                | -2.101841           |
| 1052 | 214931  | Fbxl16        | F-box and leucine-rich repeat protein 16                                                 | 0               | 2               | 0                | -2.101051           |
| 1053 | 109229  | C030004A17Rik | family with sequence similarity 118, member B                                            | 0               | 2               | 0                | -2.100936           |
| 1054 | 66827   | Ttc1          | tetratricopeptide repeat domain 1                                                        | 0               | 2               | 0                | -2.100631           |
| 1055 | 18798   | Plcb4         | phospholipase C, beta 4                                                                  | 0               | 2               | 0                | -2.100562           |
| 1056 | 320558  | 4930518F03Rik | synaptonemal complex protein 2                                                           | 0               | 2               | 0                | -2.098941           |
| 1057 | 72723   | Zfp74         | zinc finger protein 74                                                                   | 0               | 2               | 0                | -2.098907           |
| 1058 | 56188   | Fxyd1         | FXVD domain-containing ion transport regulator 1                                         | 0               | 2               | 0                | -2.098807           |
| 1059 | 53324   | Nptx2         | neuronal pentraxin 2                                                                     | 0               | 2               | 0                | -2.098508           |
| 1060 | 77432   | 9530002B09Rik | RIKEN cDNA 9530002B09 gene                                                               | 0               | 2               | 0                | -2.098321           |
| 1061 | 22092   | Tsga2         | radial spoke head 1 homolog (Chlamydomonas)                                              | 0               | 2               | 0                | -2.097515           |
| 1062 | 232889  | Pla2g4c       | phospholipase A2, group IVC (cytosolic, calcium-independent)                             | 0               | 2               | 0                | -2.097283           |
| 1063 | 66588   | Cmpk          | cytidine monophosphate (UMP-CMP) kinase 1                                                | 0               | 2               | 0                | -2.097119           |
| 1064 | 328424  | Kcnrg         | potassium channel regulator                                                              | 0               | 2               | 0                | -2.097016           |
| 1065 | 258711  | Olf432        | olfactory receptor 432                                                                   | 0               | 2               | 0                | -2.096908           |
| 1066 | 57430   | Sult3a1       | sulfotransferase family 3A, member 1                                                     | 0               | 2               | 0                | -2.096762           |
| 1067 | 230558  | C8a           | complement component 8, alpha polypeptide                                                | 0               | 2               | 0                | -2.096302           |
| 1068 | 66557   | Bpil1         | BPI fold containing family B, member 2                                                   | 0               | 2               | 0                | -2.096297           |
| 1069 | 66395   | Ahnak         | AHNAK nucleoprotein (desmoyokin)                                                         | 0               | 2               | 0                | -2.096141           |
| 1070 | 74133   | 1200011M11Rik | RIKEN cDNA 1200011M11 gene                                                               | 0               | 2               | 0                | -2.095887           |
| 1071 | 76701   | Ctrc          | chymotrypsin C (caldecrin)                                                               | 0               | 2               | 0                | -2.095321           |
| 1072 | 110310  | Krt2-7        | keratin 7                                                                                | 0               | 2               | 0                | -2.094311           |
| 1073 | 71425   | 5430413K10Rik | BPI fold containing family B, member 9A                                                  | 0               | 2               | 0                | -2.094113           |
| 1074 | 109019  | 5830411E10Rik | oligonucleotide/oligosaccharide-binding fold containing 2A                               | 0               | 2               | 0                | -2.092413           |
| 1075 | 18014   | Neurog1       | neurogenin 1                                                                             | 0               | 2               | 0                | -2.09194            |
| 1076 | 12661   | Chl1          | cell adhesion molecule with homology to L1CAM                                            | 0               | 2               | 0                | -2.089517           |
| 1077 | 259053  | Olf362        | olfactory receptor 362                                                                   | 0               | 2               | 0                | -2.088626           |
| 1078 | 18369   | Olf68         | olfactory receptor 68                                                                    | 0               | 2               | 0                | -2.088145           |
| 1079 | 234384  | BC051227      | MPV17 mitochondrial membrane protein-like 2                                              | 0               | 2               | 0                | -2.087634           |
| 1080 | 245074  | UNK           | NA                                                                                       | 0               | 2               | 0                | -2.087448           |
| 1081 | 73103   | 3110009E18Rik | RIKEN cDNA 3110009E18 gene                                                               | 0               | 2               | 0                | -2.086829           |
| 1082 | 74365   | Lonrf3        | LON peptidase N-terminal domain and ring finger 3                                        | 0               | 2               | 0                | -2.086468           |
| 1083 | 54401   | Ywhab         | tyrosine 3-monooxygenase/tryptophan 5-monooxygenase activation protein, beta polypeptide | 0               | 2               | 0                | -2.08616            |
| 1084 | 80732   | Mynn          | myoneurin                                                                                | 0               | 2               | 0                | -2.085848           |

## Candidates for positive regulators of normal growth (DESeq)

| Rank | entrez# | Gene Symbol   | Gene name                                                                                             | enriched shRNAs | depleted shRNAs | no change shRNAs | average Fold Change |
|------|---------|---------------|-------------------------------------------------------------------------------------------------------|-----------------|-----------------|------------------|---------------------|
| 1085 | 56519   | Defb4         | defensin beta 4                                                                                       | 0               | 2               | 0                | -2.082637           |
| 1086 | 102626  | Mapkapk3      | mitogen-activated protein kinase-activated protein kinase 3                                           | 0               | 2               | 0                | -2.081482           |
| 1087 | 20446   | St6galnac2    | ST6 (alpha-N-acetyl-neuraminy1-2,3-beta-galactosyl-1,3)-N-acetylgalactosaminide alpha-2,6-sialyltrans | 0               | 2               | 0                | -2.080429           |
| 1088 | 353283  | Eras          | ES cell-expressed Ras                                                                                 | 0               | 2               | 0                | -2.078156           |
| 1089 | 258456  | Olfir1196     | olfactory receptor 1196                                                                               | 0               | 2               | 0                | -2.076367           |
| 1090 | 72508   | Rps6kb1       | ribosomal protein S6 kinase, polypeptide 1                                                            | 0               | 2               | 0                | -2.074139           |
| 1091 | 74463   | 4933417E01Rik | exocyst complex component 3-like 2                                                                    | 0               | 2               | 0                | -2.074071           |
| 1092 | 107047  | Tnfsf5ip1     | proteasome (prosome, macropain) assembly chaperone 2                                                  | 0               | 2               | 0                | -2.073429           |
| 1093 | 19892   | Rpe65         | retinal pigment epithelium 65                                                                         | 0               | 2               | 0                | -2.073036           |
| 1094 | 142681  | Slc34a3       | solute carrier family 34 (sodium phosphate), member 3                                                 | 0               | 2               | 0                | -2.071089           |
| 1095 | 56277   | Tmem45a       | transmembrane protein 45a                                                                             | 0               | 2               | 0                | -2.070454           |
| 1096 | 22215   | Ube3a         | ubiquitin protein ligase E3A                                                                          | 0               | 2               | 0                | -2.069656           |
| 1097 | 17350   | Mlh1          | mutL homolog 1 (E. coli)                                                                              | 0               | 2               | 0                | -2.069625           |
| 1098 | 68231   | 1700113O17Rik | H2A histone family, member B1                                                                         | 0               | 2               | 0                | -2.069031           |
| 1099 | 67241   | Smc6          | structural maintenance of chromosomes 6                                                               | 0               | 2               | 0                | -2.06824            |
| 1100 | 24064   | Spry2         | sprouty homolog 2 (Drosophila)                                                                        | 0               | 2               | 0                | -2.067551           |
| 1101 | 67980   | Gnpda2        | glucosamine-6-phosphate deaminase 2                                                                   | 0               | 2               | 0                | -2.067218           |
| 1102 | 434496  | UNK           | NA                                                                                                    | 0               | 2               | 0                | -2.066759           |
| 1103 | 22230   | Ufd1l         | ubiquitin fusion degradation 1 like                                                                   | 0               | 2               | 0                | -2.065463           |
| 1104 | 320640  | 9530098N22Rik | selection and upkeep of intraepithelial T cells 4                                                     | 0               | 2               | 0                | -2.06174            |
| 1105 | 27390   | Mmel1         | membrane metallo-endopeptidase-like 1                                                                 | 0               | 2               | 0                | -2.061593           |
| 1106 | 268860  | Abat          | 4-aminobutyrate aminotransferase                                                                      | 0               | 2               | 0                | -2.059733           |
| 1107 | 70333   | Cd3eap        | CD3E antigen, epsilon polypeptide associated protein                                                  | 0               | 2               | 0                | -2.059133           |
| 1108 | 75705   | Eif4b         | eukaryotic translation initiation factor 4B                                                           | 0               | 2               | 0                | -2.056837           |
| 1109 | 280621  | BC089491      | cDNA sequence BC089491                                                                                | 0               | 2               | 0                | -2.056758           |
| 1110 | 16159   | Il12a         | interleukin 12a                                                                                       | 0               | 2               | 0                | -2.056411           |
| 1111 | 241915  | Phc3          | polyhomeotic-like 3 (Drosophila)                                                                      | 0               | 2               | 0                | -2.056061           |
| 1112 | 71950   | Nanog         | Nanog homeobox                                                                                        | 0               | 2               | 0                | -2.055992           |
| 1113 | 12048   | Bcl2l1        | BCL2-like 1                                                                                           | 0               | 2               | 0                | -2.055732           |
| 1114 | 56443   | Arpc1a        | actin related protein 2/3 complex, subunit 1A                                                         | 0               | 2               | 0                | -2.052426           |
| 1115 | 217262  | Abca9         | ATP-binding cassette, sub-family A (ABC1), member 9                                                   | 0               | 2               | 0                | -2.051977           |
| 1116 | 240068  | D10628        | zinc finger protein 563                                                                               | 0               | 2               | 0                | -2.050918           |
| 1117 | 17882   | Myh2          | myosin, heavy polypeptide 2, skeletal muscle, adult                                                   | 0               | 2               | 0                | -2.050549           |
| 1118 | 18712   | Pim1          | proviral integration site 1                                                                           | 0               | 2               | 0                | -2.050511           |

## Candidates for positive regulators of normal growth (DESeq)

| Rank | entrez# | Gene Symbol | Gene name                                                            | enriched shRNAs | depleted shRNAs | no change shRNAs | average Fold Change |
|------|---------|-------------|----------------------------------------------------------------------|-----------------|-----------------|------------------|---------------------|
| 1119 | 171263  | V1re10      | vomeronasal 1 receptor 67                                            | 0               | 2               | 0                | -2.049897           |
| 1120 | 12469   | Cct8        | chaperonin containing Tcp1, subunit 8 (theta)                        | 0               | 2               | 0                | -2.047305           |
| 1121 | 76299   | Txndc4      | endoplasmic reticulum protein 44                                     | 0               | 2               | 0                | -2.045957           |
| 1122 | 17221   | Cd46        | CD46 antigen, complement regulatory protein                          | 0               | 2               | 0                | -2.045918           |
| 1123 | 14406   | Gabrg2      | gamma-aminobutyric acid (GABA) A receptor, subunit gamma 2           | 0               | 2               | 0                | -2.044668           |
| 1124 | 404473  | Olf1r1082   | olfactory receptor 1082                                              | 0               | 2               | 0                | -2.042687           |
| 1125 | 20526   | Slc2a2      | solute carrier family 2 (facilitated glucose transporter), member 2  | 0               | 2               | 0                | -2.040558           |
| 1126 | 223664  | Lrrc14      | leucine rich repeat containing 14                                    | 0               | 2               | 0                | -2.039226           |
| 1127 | 279029  | Gm711       | predicted gene 711                                                   | 0               | 2               | 0                | -2.038253           |
| 1128 | 54483   | Mefv        | Mediterranean fever                                                  | 0               | 2               | 0                | -2.037355           |
| 1129 | 225875  | Lrfr4       | leucine rich repeat and fibronectin type III domain containing 4     | 0               | 2               | 0                | -2.036666           |
| 1130 | 13712   | Elk1        | ELK1, member of ETS oncogene family                                  | 0               | 2               | 0                | -2.036492           |
| 1131 | 433995  | UNK         | NA                                                                   | 0               | 2               | 0                | -2.034723           |
| 1132 | 68797   | Pdgfrl      | platelet-derived growth factor receptor-like                         | 0               | 2               | 0                | -2.034278           |
| 1133 | 93888   | Pcdhb17     | protocadherin beta 17                                                | 0               | 2               | 0                | -2.033602           |
| 1134 | 64424   | Polr1e      | polymerase (RNA) I polypeptide E                                     | 0               | 2               | 0                | -2.032484           |
| 1135 | 13804   | Endog       | endonuclease G                                                       | 0               | 2               | 0                | -2.031572           |
| 1136 | 84092   | Usp8        | ubiquitin specific peptidase 8                                       | 0               | 2               | 0                | -2.029444           |
| 1137 | 269966  | Nup98       | nucleoporin 98                                                       | 0               | 2               | 0                | -2.028759           |
| 1138 | 28113   | Tinf2       | Terf1 (TRF1)-interacting nuclear factor 2                            | 0               | 2               | 0                | -2.028085           |
| 1139 | 226866  | Gm106       | predicted gene 106                                                   | 0               | 2               | 0                | -2.026508           |
| 1140 | 83493   | Sacm1l      | SAC1 (suppressor of actin mutations 1, homolog)-like (S. cerevisiae) | 0               | 2               | 0                | -2.025238           |
| 1141 | 17991   | Ndufa2      | NADH dehydrogenase (ubiquinone) 1 alpha subcomplex, 2                | 0               | 2               | 0                | -2.023879           |
| 1142 | 20055   | Rps16       | ribosomal protein S16                                                | 0               | 2               | 0                | -2.023575           |
| 1143 | 66138   | Wbscr22     | Williams Beuren syndrome chromosome region 22                        | 0               | 2               | 0                | -2.021787           |
| 1144 | 14588   | Gfra4       | glial cell line derived neurotrophic factor family receptor alpha 4  | 0               | 2               | 0                | -2.021038           |
| 1145 | 18515   | Pbx2        | pre B cell leukemia homeobox 2                                       | 0               | 2               | 0                | -2.020844           |
| 1146 | 15126   | Hba-x       | hemoglobin X, alpha-like embryonic chain in Hba complex              | 0               | 2               | 0                | -2.020841           |
| 1147 | 12482   | Ms4a1       | membrane-spanning 4-domains, subfamily A, member 1                   | 0               | 2               | 0                | -2.020092           |
| 1148 | 56456   | Actl6a      | actin-like 6A                                                        | 0               | 2               | 0                | -2.018002           |
| 1149 | 64945   | Cldn12      | claudin 12                                                           | 0               | 2               | 0                | -2.01785            |
| 1150 | 245839  | Gzmn        | granzyme N                                                           | 0               | 2               | 0                | -2.017586           |
| 1151 | 19942   | Rpl27       | ribosomal protein L27                                                | 0               | 2               | 0                | -2.016525           |
| 1152 | 329324  | Syt14       | synaptotagmin XIV                                                    | 0               | 2               | 0                | -2.016433           |

Candidates for positive regulators of normal growth (DESeq)

| Rank | entrez# | Gene Symbol   | Gene name                                                                                         | enriched shRNAs | depleted shRNAs | no change shRNAs | average Fold Change |
|------|---------|---------------|---------------------------------------------------------------------------------------------------|-----------------|-----------------|------------------|---------------------|
| 1153 | 404285  | V1rd11        | vomeronasal 1 receptor 64                                                                         | 0               | 2               | 0                | -2.01628            |
| 1154 | 224109  | Lrrc33        | leucine rich repeat containing 33                                                                 | 0               | 2               | 0                | -2.014705           |
| 1155 | 12044   | Bcl2a1a       | B cell leukemia/lymphoma 2 related protein A1a                                                    | 0               | 2               | 0                | -2.014644           |
| 1156 | 13819   | Epas1         | endothelial PAS domain protein 1                                                                  | 0               | 2               | 0                | -2.014616           |
| 1157 | 69367   | Glx2          | glutaredoxin 2 (thioltransferase)                                                                 | 0               | 2               | 0                | -2.014483           |
| 1158 | 15260   | Hira          | histone cell cycle regulation defective homolog A (S. cerevisiae)                                 | 0               | 2               | 0                | -2.014087           |
| 1159 | 140792  | Colec12       | collectin sub-family member 12                                                                    | 0               | 2               | 0                | -2.012174           |
| 1160 | 18673   | Phb           | prohibitin                                                                                        | 0               | 2               | 0                | -2.011141           |
| 1161 | 73845   | Ankrd42       | ankyrin repeat domain 42                                                                          | 0               | 2               | 0                | -2.010996           |
| 1162 | 67701   | Wfdc2         | WAP four-disulfide core domain 2                                                                  | 0               | 2               | 0                | -2.010696           |
| 1163 | 235293  | Sc5d          | sterol-C5-desaturase (fungal ERG3, delta-5-desaturase) homolog (S. cerevisiae)                    | 0               | 2               | 0                | -2.010677           |
| 1164 | 71988   | Esco2         | establishment of cohesion 1 homolog 2 (S. cerevisiae)                                             | 0               | 2               | 0                | -2.010591           |
| 1165 | 11537   | Cfd           | complement factor D (adipsin)                                                                     | 0               | 2               | 0                | -2.010515           |
| 1166 | 72585   | Lypd1         | Ly6/Plaur domain containing 1                                                                     | 0               | 2               | 0                | -2.010403           |
| 1167 | 21789   | Tfpi2         | tissue factor pathway inhibitor 2                                                                 | 0               | 2               | 0                | -2.008652           |
| 1168 | 279572  | Tlr13         | toll-like receptor 13                                                                             | 0               | 2               | 0                | -2.008489           |
| 1169 | 58180   | Hic2          | hypermethylated in cancer 2                                                                       | 0               | 2               | 0                | -2.00844            |
| 1170 | 270097  | Al427515      | vesicle amine transport protein 1 homolog-like (T. californica)                                   | 0               | 2               | 0                | -2.006145           |
| 1171 | 14200   | Fhl2          | four and a half LIM domains 2                                                                     | 0               | 2               | 0                | -2.005044           |
| 1172 | 12723   | Clcn1         | chloride channel 1                                                                                | 0               | 2               | 0                | -2.002607           |
| 1173 | 14864   | Gstm3         | glutathione S-transferase, mu 3                                                                   | 0               | 2               | 0                | -2.002506           |
| 1174 | 69232   | 2610028H07Rik | glutamine-rich 1                                                                                  | 0               | 2               | 0                | -2.002405           |
| 1175 | 20290   | Ccl1          | chemokine (C-C motif) ligand 1                                                                    | 0               | 2               | 0                | -2.001963           |
| 1176 | 171196  | V1rc23        | vomeronasal 1 receptor 22                                                                         | 0               | 2               | 0                | -2.000768           |
| 1177 | 11867   | Arpc1b        | actin related protein 2/3 complex, subunit 1B                                                     | 0               | 2               | 0                | -2.000145           |
| 1178 | 18570   | Pdcd6         | programmed cell death 6                                                                           | 0               | 2               | 0                | -1.999335           |
| 1179 | 18096   | Nkx6-1        | NK6 homeobox 1                                                                                    | 0               | 2               | 0                | -1.999203           |
| 1180 | 109978  | Art4          | ADP-ribosyltransferase 4                                                                          | 0               | 2               | 0                | -1.998903           |
| 1181 | 17768   | Mthfd2        | methylenetetrahydrofolate dehydrogenase (NAD+ dependent), methenyltetrahydrofolate cyclohydrolase | 0               | 2               | 0                | -1.997968           |
| 1182 | 19277   | Ptpro         | protein tyrosine phosphatase, receptor type, O                                                    | 0               | 2               | 0                | -1.997269           |
| 1183 | 75717   | Cul5          | cullin 5                                                                                          | 0               | 2               | 0                | -1.997058           |
| 1184 | 66589   | Ube2v1        | ubiquitin-conjugating enzyme E2 variant 1                                                         | 0               | 2               | 0                | -1.996552           |
| 1185 | 52686   | Mettl2        | methyltransferase like 2                                                                          | 0               | 2               | 0                | -1.995483           |
| 1186 | 58801   | Pmaip1        | phorbol-12-myristate-13-acetate-induced protein 1                                                 | 0               | 2               | 0                | -1.995464           |

## Candidates for positive regulators of normal growth (DESeq)

| Rank | entrez# | Gene Symbol   | Gene name                                                                      | enriched shRNAs | depleted shRNAs | no change shRNAs | average Fold Change |
|------|---------|---------------|--------------------------------------------------------------------------------|-----------------|-----------------|------------------|---------------------|
| 1187 | 67150   | Rnf141        | ring finger protein 141                                                        | 0               | 2               | 0                | -1.995333           |
| 1188 | 258792  | Olfir1499     | olfactory receptor 1499                                                        | 0               | 2               | 0                | -1.995101           |
| 1189 | 14343   | Fut1          | fucosyltransferase 1                                                           | 0               | 2               | 0                | -1.99357            |
| 1190 | 109620  | Dsp           | desmoplakin                                                                    | 0               | 2               | 0                | -1.990793           |
| 1191 | 382590  | UNK           | NA                                                                             | 0               | 2               | 0                | -1.989443           |
| 1192 | 17979   | Ncoa3         | nuclear receptor coactivator 3                                                 | 0               | 2               | 0                | -1.989372           |
| 1193 | 18617   | Rhox5         | reproductive homeobox 5                                                        | 0               | 2               | 0                | -1.988742           |
| 1194 | 101869  | Unc45a        | unc-45 homolog A (C. elegans)                                                  | 0               | 2               | 0                | -1.988255           |
| 1195 | 194360  | LOC194360     | trypsinogen pseudogene                                                         | 0               | 2               | 0                | -1.98783            |
| 1196 | 244867  | Arhgap20      | Rho GTPase activating protein 20                                               | 0               | 2               | 0                | -1.987706           |
| 1197 | 73690   | Glipr1        | GLI pathogenesis-related 1 (glioma)                                            | 0               | 2               | 0                | -1.987464           |
| 1198 | 399549  | H2-M10.6      | histocompatibility 2, M region locus 10.6                                      | 0               | 2               | 0                | -1.986839           |
| 1199 | 107993  | Bfsp2         | beaded filament structural protein 2, phakinin                                 | 0               | 2               | 0                | -1.986788           |
| 1200 | 228576  | Mall          | mal, T cell differentiation protein-like                                       | 0               | 2               | 0                | -1.986553           |
| 1201 | 12176   | Bnip3         | BCL2/adenovirus E1B interacting protein 3                                      | 0               | 2               | 0                | -1.985861           |
| 1202 | 17898   | Myl7          | myosin, light polypeptide 7, regulatory                                        | 0               | 2               | 0                | -1.98566            |
| 1203 | 258730  | Olfir483      | olfactory receptor 483                                                         | 0               | 2               | 0                | -1.984756           |
| 1204 | 50850   | Spast         | spastin                                                                        | 0               | 2               | 0                | -1.98314            |
| 1205 | 227613  | Tubb2c        | tubulin, beta 4B class IVB                                                     | 0               | 2               | 0                | -1.982409           |
| 1206 | 74917   | 4930474M22Rik | RIKEN cDNA 4930474M22 gene                                                     | 0               | 2               | 0                | -1.980884           |
| 1207 | 17933   | Myt1l         | myelin transcription factor 1-like                                             | 0               | 2               | 0                | -1.979926           |
| 1208 | 209378  | Itih5         | inter-alpha (globulin) inhibitor H5                                            | 0               | 2               | 0                | -1.979926           |
| 1209 | 19225   | Ptgs2         | prostaglandin-endoperoxide synthase 2                                          | 0               | 2               | 0                | -1.979858           |
| 1210 | 69352   | Efcbp1        | N-terminal EF-hand calcium binding protein 1                                   | 0               | 2               | 0                | -1.979084           |
| 1211 | 66258   | Mrps17        | mitochondrial ribosomal protein S17                                            | 0               | 2               | 0                | -1.97862            |
| 1212 | 64074   | Smoc2         | SPARC related modular calcium binding 2                                        | 0               | 2               | 0                | -1.977843           |
| 1213 | 26572   | Cops3         | COP9 (constitutive photomorphogenic) homolog, subunit 3 (Arabidopsis thaliana) | 0               | 2               | 0                | -1.976763           |
| 1214 | 22044   | Trh           | thyrotropin releasing hormone                                                  | 0               | 2               | 0                | -1.976423           |
| 1215 | 76653   | 1700121K02Rik | chibby homolog 3 (Drosophila)                                                  | 0               | 2               | 0                | -1.975779           |
| 1216 | 13007   | Csrp1         | cysteine and glycine-rich protein 1                                            | 0               | 2               | 0                | -1.974723           |
| 1217 | 16568   | Kif3a         | kinesin family member 3A                                                       | 0               | 2               | 0                | -1.974533           |
| 1218 | 84506   | Hamp1         | hepcidin antimicrobial peptide                                                 | 0               | 2               | 0                | -1.974111           |
| 1219 | 12638   | Cftr          | cystic fibrosis transmembrane conductance regulator homolog                    | 0               | 2               | 0                | -1.97407            |
| 1220 | 269261  | Rpl12         | ribosomal protein L12                                                          | 0               | 2               | 0                | -1.974032           |



## Candidates for positive regulators of normal growth (DESeq)

| Rank | entrez# | Gene Symbol   | Gene name                                                                                         | enriched shRNAs | depleted shRNAs | no change shRNAs | average Fold Change |
|------|---------|---------------|---------------------------------------------------------------------------------------------------|-----------------|-----------------|------------------|---------------------|
| 1221 | 209380  | LOC209380     | GTPase, very large interferon inducible 1 pseudogene                                              | 0               | 2               | 0                | -1.973637           |
| 1222 | 435366  | LOC435366     | predicted gene 5665                                                                               | 0               | 2               | 0                | -1.973112           |
| 1223 | 17207   | Mcf2l         | mcf.2 transforming sequence-like                                                                  | 0               | 2               | 0                | -1.972564           |
| 1224 | 320407  | Klri2         | killer cell lectin-like receptor family I member 2                                                | 0               | 2               | 0                | -1.972044           |
| 1225 | 29806   | Limd1         | LIM domains containing 1                                                                          | 0               | 2               | 0                | -1.971063           |
| 1226 | 245877  | Rprc1         | microtubule-associated protein 7 domain containing 1                                              | 0               | 2               | 0                | -1.970153           |
| 1227 | 69312   | 4930418G15Rik | protein phosphatase 1, regulatory subunit 42                                                      | 0               | 2               | 0                | -1.969964           |
| 1228 | 14969   | H2-Eb1        | histocompatibility 2, class II antigen E beta                                                     | 0               | 2               | 0                | -1.967628           |
| 1229 | 64339   | Fndc4         | fibronectin type III domain containing 4                                                          | 0               | 2               | 0                | -1.967404           |
| 1230 | 66317   | Wdr61         | WD repeat domain 61                                                                               | 0               | 2               | 0                | -1.966719           |
| 1231 | 231002  | Plekhn1       | pleckstrin homology domain containing, family N member 1                                          | 0               | 2               | 0                | -1.964969           |
| 1232 | 66957   | Serpib1       | serine (or cysteine) peptidase inhibitor, clade B (ovalbumin), member 11                          | 0               | 2               | 0                | -1.964968           |
| 1233 | 57438   |               | 39147 membrane-associated ring finger (C3HC4) 7                                                   | 0               | 2               | 0                | -1.964129           |
| 1234 | 328264  | A030007L22    | NA                                                                                                | 0               | 2               | 0                | -1.964094           |
| 1235 | 72195   | Supt7l        | suppressor of Ty 7 ( <i>S. cerevisiae</i> )-like                                                  | 0               | 2               | 0                | -1.962981           |
| 1236 | 54611   | Pde3a         | phosphodiesterase 3A, cGMP inhibited                                                              | 0               | 2               | 0                | -1.962684           |
| 1237 | 380698  | Obscn         | obscurin, cytoskeletal calmodulin and titin-interacting RhoGEF                                    | 0               | 2               | 0                | -1.961491           |
| 1238 | 338375  | Atp6v1g3      | ATPase, H+ transporting, lysosomal V1 subunit G3                                                  | 0               | 2               | 0                | -1.961081           |
| 1239 | 53619   | Bicap         | bladder cancer associated protein homolog (human)                                                 | 0               | 2               | 0                | -1.960476           |
| 1240 | 17168   | Mare          | nitrogen permease regulator-like 3 ( <i>S. cerevisiae</i> )                                       | 0               | 2               | 0                | -1.960415           |
| 1241 | 217845  | 1810023F06Rik | interferon, alpha-inducible protein 27 like 2B                                                    | 0               | 2               | 0                | -1.959955           |
| 1242 | 12362   | Casp1         | caspase 1                                                                                         | 0               | 2               | 0                | -1.959695           |
| 1243 | 101533  | Klk9          | kallikrein related-peptidase 9                                                                    | 0               | 2               | 0                | -1.959304           |
| 1244 | 16671   | Krt1-3        | keratin 33B                                                                                       | 0               | 2               | 0                | -1.958643           |
| 1245 | 20587   | Smarcb1       | SWI/SNF related, matrix associated, actin dependent regulator of chromatin, subfamily b, member 1 | 0               | 2               | 0                | -1.958635           |
| 1246 | 11625   | Ahsg          | alpha-2-HS-glycoprotein                                                                           | 0               | 2               | 0                | -1.958222           |
| 1247 | 109093  | Rarsl         | arginyl-tRNA synthetase 2, mitochondrial                                                          | 0               | 2               | 0                | -1.957482           |
| 1248 | 69721   | Nkiras1       | NFKB inhibitor interacting Ras-like protein 1                                                     | 0               | 2               | 0                | -1.95741            |
| 1249 | 108800  | Ston2         | stonin 2                                                                                          | 0               | 2               | 0                | -1.956511           |
| 1250 | 74498   | Gorasp1       | golgi reassembly stacking protein 1                                                               | 0               | 2               | 0                | -1.955965           |
| 1251 | 26992   | Brd7          | bromodomain containing 7                                                                          | 0               | 2               | 0                | -1.955832           |
| 1252 | 381815  | UNK           | NA                                                                                                | 0               | 2               | 0                | -1.955279           |
| 1253 | 56494   | Gosr2         | golgi SNAP receptor complex member 2                                                              | 0               | 2               | 0                | -1.955199           |
| 1254 | 18588   | Pde6g         | phosphodiesterase 6G, cGMP-specific, rod, gamma                                                   | 0               | 2               | 0                | -1.954406           |

## Candidates for positive regulators of normal growth (DESeq)

| Rank | entrez# | Gene Symbol | Gene name                                                                                      | enriched shRNAs | depleted shRNAs | no change shRNAs | average Fold Change |
|------|---------|-------------|------------------------------------------------------------------------------------------------|-----------------|-----------------|------------------|---------------------|
| 1255 | 67554   | Slc25a30    | solute carrier family 25, member 30                                                            | 0               | 2               | 0                | -1.953507           |
| 1256 | 110312  | Pmch        | pro-melanin-concentrating hormone                                                              | 0               | 2               | 0                | -1.953024           |
| 1257 | 232023  | AW146242    | vesicular, overexpressed in cancer, prosurvival protein 1                                      | 0               | 2               | 0                | -1.952729           |
| 1258 | 26446   | Psmb3       | proteasome (prosome, macropain) subunit, beta type 3                                           | 0               | 2               | 0                | -1.952084           |
| 1259 | 67399   | Pdlim7      | PDZ and LIM domain 7                                                                           | 0               | 2               | 0                | -1.95191            |
| 1260 | 19732   | Rgl2        | ral guanine nucleotide dissociation stimulator-like 2                                          | 0               | 2               | 0                | -1.951085           |
| 1261 | 103573  | Xpo1        | exportin 1, CRM1 homolog (yeast)                                                               | 0               | 2               | 0                | -1.949501           |
| 1262 | 319655  | Podxl2      | podocalyxin-like 2                                                                             | 0               | 2               | 0                | -1.949081           |
| 1263 | 408190  | Wfdc13      | WAP four-disulfide core domain 13                                                              | 0               | 2               | 0                | -1.948172           |
| 1264 | 66840   | Wdr45l      | Wdr45 like                                                                                     | 0               | 2               | 0                | -1.947879           |
| 1265 | 433358  | UNK         | NA                                                                                             | 0               | 2               | 0                | -1.946687           |
| 1266 | 116940  | Ncoa6ip     | trimethylguanosine synthase homolog (S. cerevisiae)                                            | 0               | 2               | 0                | -1.946405           |
| 1267 | 105787  | Prkaa1      | protein kinase, AMP-activated, alpha 1 catalytic subunit                                       | 0               | 2               | 0                | -1.945835           |
| 1268 | 12492   | Scarb2      | scavenger receptor class B, member 2                                                           | 0               | 2               | 0                | -1.944224           |
| 1269 | 217337  | Srp68       | signal recognition particle 68                                                                 | 0               | 2               | 0                | -1.942732           |
| 1270 | 16949   | Loxl1       | lysyl oxidase-like 1                                                                           | 0               | 2               | 0                | -1.942658           |
| 1271 | 210801  | Unc5d       | unc-5 homolog D (C. elegans)                                                                   | 0               | 2               | 0                | -1.942291           |
| 1272 | 17203   | Mc5r        | melanocortin 5 receptor                                                                        | 0               | 2               | 0                | -1.941739           |
| 1273 | 66916   | Ndufb7      | NADH dehydrogenase (ubiquinone) 1 beta subcomplex, 7                                           | 0               | 2               | 0                | -1.940393           |
| 1274 | 433642  | UNK         | NA                                                                                             | 0               | 2               | 0                | -1.939528           |
| 1275 | 13589   | Mapre1      | microtubule-associated protein, RP/EB family, member 1                                         | 0               | 2               | 0                | -1.939387           |
| 1276 | 72727   | B3gat3      | beta-1,3-glucuronyltransferase 3 (glucuronosyltransferase I)                                   | 0               | 2               | 0                | -1.939239           |
| 1277 | 17187   | Max         | Max protein                                                                                    | 0               | 2               | 0                | -1.938994           |
| 1278 | 22123   | Psmc3       | proteasome (prosome, macropain) 26S subunit, non-ATPase, 3                                     | 0               | 2               | 0                | -1.937946           |
| 1279 | 19268   | Ptprf       | protein tyrosine phosphatase, receptor type, F                                                 | 0               | 2               | 0                | -1.937758           |
| 1280 | 22642   | Zbtb17      | zinc finger and BTB domain containing 17                                                       | 0               | 2               | 0                | -1.93774            |
| 1281 | 64144   | Mllt1       | myeloid/lymphoid or mixed-lineage leukemia (trithorax homolog, Drosophila); translocated to, 1 | 0               | 2               | 0                | -1.935418           |
| 1282 | 71241   | Dmrtc2      | doublesex and mab-3 related transcription factor like family C2                                | 0               | 2               | 0                | -1.935113           |
| 1283 | 224598  | BC021442    | zinc finger protein 758                                                                        | 0               | 2               | 0                | -1.934584           |
| 1284 | 108014  | Sfrs9       | serine/arginine-rich splicing factor 9                                                         | 0               | 2               | 0                | -1.934169           |
| 1285 | 78076   | Lcn8        | lipocalin 8                                                                                    | 0               | 2               | 0                | -1.93401            |
| 1286 | 208518  | Cep78       | centrosomal protein 78                                                                         | 0               | 2               | 0                | -1.933688           |
| 1287 | 68420   | Ankrd13a    | ankyrin repeat domain 13a                                                                      | 0               | 2               | 0                | -1.932999           |
| 1288 | 192897  | Itgb4       | integrin beta 4                                                                                | 0               | 2               | 0                | -1.931715           |

## Candidates for positive regulators of normal growth (DESeq)

| Rank | entrez# | Gene Symbol   | Gene name                                                                                      | enriched shRNAs | depleted shRNAs | no change shRNAs | average Fold Change |
|------|---------|---------------|------------------------------------------------------------------------------------------------|-----------------|-----------------|------------------|---------------------|
| 1289 | 67774   | Loh12cr1      | loss of heterozygosity, 12, chromosomal region 1 homolog (human)                               | 0               | 2               | 0                | -1.931373           |
| 1290 | 108098  | Surb7         | mediator complex subunit 21                                                                    | 0               | 2               | 0                | -1.930908           |
| 1291 | 110902  | Chrna2        | cholinergic receptor, nicotinic, alpha polypeptide 2 (neuronal)                                | 0               | 2               | 0                | -1.930493           |
| 1292 | 78923   | 4833446K15Rik | chondroitin sulfate synthase 3                                                                 | 0               | 2               | 0                | -1.930289           |
| 1293 | 171262  | V1rl1         | vomeronasal 1 receptor 70                                                                      | 0               | 2               | 0                | -1.930245           |
| 1294 | 320183  | Msrb3         | methionine sulfoxide reductase B3                                                              | 0               | 2               | 0                | -1.930033           |
| 1295 | 108052  | Slc14a1       | solute carrier family 14 (urea transporter), member 1                                          | 0               | 2               | 0                | -1.929198           |
| 1296 | 218171  | UNK           | NA                                                                                             | 0               | 2               | 0                | -1.929154           |
| 1297 | 11634   | Aire          | autoimmune regulator (autoimmune polyendocrinopathy candidiasis ectodermal dystrophy)          | 0               | 2               | 0                | -1.928426           |
| 1298 | 79044   | Mrps34        | mitochondrial ribosomal protein S34                                                            | 0               | 2               | 0                | -1.926718           |
| 1299 | 14972   | H2-K1         | histocompatibility 2, K1, K region                                                             | 0               | 2               | 0                | -1.926558           |
| 1300 | 18810   | Plec1         | plectin                                                                                        | 0               | 2               | 0                | -1.925425           |
| 1301 | 71810   | Ranbp3        | RAN binding protein 3                                                                          | 0               | 2               | 0                | -1.925185           |
| 1302 | 110524  | Dgkq          | diacylglycerol kinase, theta                                                                   | 0               | 2               | 0                | -1.925177           |
| 1303 | 258695  | Olf1453       | olfactory receptor 1453                                                                        | 0               | 2               | 0                | -1.924449           |
| 1304 | 20666   | Sox11         | SRY-box containing gene 11                                                                     | 0               | 2               | 0                | -1.924396           |
| 1305 | 66481   | Rps21         | ribosomal protein S21                                                                          | 0               | 2               | 0                | -1.923805           |
| 1306 | 258764  | Olf1099       | olfactory receptor 1099                                                                        | 0               | 2               | 0                | -1.923507           |
| 1307 | 11552   | Adra2b        | adrenergic receptor, alpha 2b                                                                  | 0               | 2               | 0                | -1.923109           |
| 1308 | 279028  | Adamts13      | a disintegrin-like and metallopeptidase (reprolysin type) with thrombospondin type 1 motif, 13 | 0               | 2               | 0                | -1.923046           |
| 1309 | 75425   | 2610036D13Rik | TELO2 interacting protein 1                                                                    | 0               | 2               | 0                | -1.92044            |
| 1310 | 72194   | Fbxl20        | F-box and leucine-rich repeat protein 20                                                       | 0               | 2               | 0                | -1.919917           |
| 1311 | 70821   | 4921507P07Rik | RIKEN cDNA 4921507P07 gene                                                                     | 0               | 2               | 0                | -1.919031           |
| 1312 | 108687  | Edem2         | ER degradation enhancer, mannosidase alpha-like 2                                              | 0               | 2               | 0                | -1.91839            |
| 1313 | 19281   | Ptprt         | protein tyrosine phosphatase, receptor type, T                                                 | 0               | 2               | 0                | -1.91816            |
| 1314 | 14208   | Ppm1g         | protein phosphatase 1G (formerly 2C), magnesium-dependent, gamma isoform                       | 0               | 2               | 0                | -1.917859           |
| 1315 | 209387  | A1451617      | tripartite motif-containing 30D                                                                | 0               | 2               | 0                | -1.917797           |
| 1316 | 110074  | Dut           | deoxyuridine triphosphatase                                                                    | 0               | 2               | 0                | -1.916504           |
| 1317 | 21872   | Tjp1          | tight junction protein 1                                                                       | 0               | 2               | 0                | -1.91608            |
| 1318 | 76156   | 6330503C03Rik | family with sequence similarity 131, member B                                                  | 0               | 2               | 0                | -1.915521           |
| 1319 | 19242   | Ptn           | pleiotrophin                                                                                   | 0               | 2               | 0                | -1.915274           |
| 1320 | 54126   | Arhgef7       | Rho guanine nucleotide exchange factor (GEF7)                                                  | 0               | 2               | 0                | -1.914991           |
| 1321 | 215472  | E130012K09    | predicted gene 4792                                                                            | 0               | 2               | 0                | -1.913882           |
| 1322 | 14590   | Ggh           | gamma-glutamyl hydrolase                                                                       | 0               | 2               | 0                | -1.913797           |

## Candidates for positive regulators of normal growth (DESeq)

| Rank | entrez# | Gene Symbol   | Gene name                                                                          | enriched shRNAs | depleted shRNAs | no change shRNAs | average Fold Change |
|------|---------|---------------|------------------------------------------------------------------------------------|-----------------|-----------------|------------------|---------------------|
| 1323 | 192194  | Butr1         | butyrophilin related 1                                                             | 0               | 2               | 0                | -1.913346           |
| 1324 | 11796   | Birc3         | baculoviral IAP repeat-containing 3                                                | 0               | 2               | 0                | -1.912864           |
| 1325 | 68458   | Ppp1r14a      | protein phosphatase 1, regulatory (inhibitor) subunit 14A                          | 0               | 2               | 0                | -1.912673           |
| 1326 | 229049  | 1700003N22Rik | NA                                                                                 | 0               | 2               | 0                | -1.912663           |
| 1327 | 80283   | Abtb1         | ankyrin repeat and BTB (POZ) domain containing 1                                   | 0               | 2               | 0                | -1.911967           |
| 1328 | 140488  | Igf2bp3       | insulin-like growth factor 2 mRNA binding protein 3                                | 0               | 2               | 0                | -1.911491           |
| 1329 | 11656   | Alas2         | aminolevulinic acid synthase 2, erythroid                                          | 0               | 2               | 0                | -1.910539           |
| 1330 | 22074   | Try4          | trypsin 4                                                                          | 0               | 2               | 0                | -1.909845           |
| 1331 | 68097   | Dynll2        | dynein light chain LC8-type 2                                                      | 0               | 2               | 0                | -1.908579           |
| 1332 | 192216  | Tmem47        | transmembrane protein 47                                                           | 0               | 2               | 0                | -1.904231           |
| 1333 | 72748   | Hdhd3         | haloacid dehalogenase-like hydrolase domain containing 3                           | 0               | 2               | 0                | -1.903683           |
| 1334 | 72345   | 2810002O09Rik | family with sequence similarity 123, member B                                      | 0               | 2               | 0                | -1.903618           |
| 1335 | 76829   | Dok5          | docking protein 5                                                                  | 0               | 2               | 0                | -1.903222           |
| 1336 | 227699  | Nup188        | nucleoporin 188                                                                    | 0               | 2               | 0                | -1.901916           |
| 1337 | 226250  | AU041783      | actin filament associated protein 1-like 2                                         | 0               | 2               | 0                | -1.900933           |
| 1338 | 66302   | 2410005O16Rik | family with sequence similarity 82, member B                                       | 0               | 2               | 0                | -1.900083           |
| 1339 | 81907   | Tmem108       | transmembrane protein 108                                                          | 0               | 2               | 0                | -1.899979           |
| 1340 | 105245  | Txndc5        | thioredoxin domain containing 5                                                    | 0               | 2               | 0                | -1.898221           |
| 1341 | 12869   | Cox8b         | cytochrome c oxidase, subunit VIIIb                                                | 0               | 2               | 0                | -1.897171           |
| 1342 | 17308   | Mgat1         | mannoside acetylglucosaminyltransferase 1                                          | 0               | 2               | 0                | -1.896843           |
| 1343 | 19338   | Rab33b        | RAB33B, member of RAS oncogene family                                              | 0               | 2               | 0                | -1.896576           |
| 1344 | 216134  | Pdxk          | pyridoxal (pyridoxine, vitamin B6) kinase                                          | 0               | 2               | 0                | -1.896156           |
| 1345 | 66629   | Golph3        | golgi phosphoprotein 3                                                             | 0               | 2               | 0                | -1.891824           |
| 1346 | 108148  | Galnt2        | UDP-N-acetyl-alpha-D-galactosamine:polypeptide N-acetylgalactosaminyltransferase 2 | 0               | 2               | 0                | -1.891282           |
| 1347 | 14027   | Evpl          | envoplakin                                                                         | 0               | 2               | 0                | -1.890434           |
| 1348 | 18984   | Por           | P450 (cytochrome) oxidoreductase                                                   | 0               | 2               | 0                | -1.890411           |
| 1349 | 18725   | Pira2         | paired-Ig-like receptor A2                                                         | 0               | 2               | 0                | -1.889848           |
| 1350 | 67729   | Mansc1        | MANSC domain containing 1                                                          | 0               | 2               | 0                | -1.889574           |
| 1351 | 18145   | Npc1          | Niemann Pick type C1                                                               | 0               | 2               | 0                | -1.888654           |
| 1352 | 100163  | Pafah2        | platelet-activating factor acetylhydrolase 2                                       | 0               | 2               | 0                | -1.888531           |
| 1353 | 194735  | 4930430D24Rik | RIKEN cDNA 4930430D24 gene                                                         | 0               | 2               | 0                | -1.888419           |
| 1354 | 18999   | Pou5f1        | POU domain, class 5, transcription factor 1                                        | 0               | 2               | 0                | -1.888077           |
| 1355 | 70433   | 2610109H07Rik | RIKEN cDNA 2610109H07 gene                                                         | 0               | 2               | 0                | -1.887506           |
| 1356 | 117590  | Asb10         | ankyrin repeat and SOCS box-containing 10                                          | 0               | 2               | 0                | -1.887496           |

## Candidates for positive regulators of normal growth (DESeq)

| Rank | entrez# | Gene Symbol   | Gene name                                                           | enriched shRNAs | depleted shRNAs | no change shRNAs | average Fold Change |
|------|---------|---------------|---------------------------------------------------------------------|-----------------|-----------------|------------------|---------------------|
| 1357 | 67302   | Zc3h13        | zinc finger CCCH type containing 13                                 | 0               | 2               | 0                | -1.886399           |
| 1358 | 66789   | Alg14         | asparagine-linked glycosylation 14 homolog (yeast)                  | 0               | 2               | 0                | -1.884235           |
| 1359 | 73481   | 1700074P13Rik | RIKEN cDNA 1700074P13 gene                                          | 0               | 2               | 0                | -1.884088           |
| 1360 | 381358  | LOC381358     | NA                                                                  | 0               | 2               | 0                | -1.883324           |
| 1361 | 14311   | Cidec         | cell death-inducing DFFA-like effector c                            | 0               | 2               | 0                | -1.881448           |
| 1362 | 216343  | Tph2          | tryptophan hydroxylase 2                                            | 0               | 2               | 0                | -1.881336           |
| 1363 | 18260   | Ocln          | occludin                                                            | 0               | 2               | 0                | -1.880621           |
| 1364 | 436121  | UNK           | NA                                                                  | 0               | 2               | 0                | -1.88018            |
| 1365 | 238377  | Gpr68         | G protein-coupled receptor 68                                       | 0               | 2               | 0                | -1.878268           |
| 1366 | 54711   | Plagl2        | pleiomorphic adenoma gene-like 2                                    | 0               | 2               | 0                | -1.877895           |
| 1367 | 54616   | Extl3         | exostoses (multiple)-like 3                                         | 0               | 2               | 0                | -1.876163           |
| 1368 | 13143   | Dapk2         | death-associated protein kinase 2                                   | 0               | 2               | 0                | -1.876151           |
| 1369 | 59026   | Huwe1         | HECT, UBA and WWE domain containing 1                               | 0               | 2               | 0                | -1.875354           |
| 1370 | 23985   | Slc26a4       | solute carrier family 26, member 4                                  | 0               | 2               | 0                | -1.875017           |
| 1371 | 16495   | Kcna7         | potassium voltage-gated channel, shaker-related subfamily, member 7 | 0               | 2               | 0                | -1.874038           |
| 1372 | 58234   | Shank3        | SH3/ankyrin domain gene 3                                           | 0               | 2               | 0                | -1.874014           |
| 1373 | 74477   | 4933427D14Rik | RIKEN cDNA 4933427D14 gene                                          | 0               | 2               | 0                | -1.871768           |
| 1374 | 434423  | Dppa5         | developmental pluripotency associated 5A                            | 0               | 2               | 0                | -1.869811           |
| 1375 | 22017   | Tpmt          | thiopurine methyltransferase                                        | 0               | 2               | 0                | -1.869269           |
| 1376 | 76784   | Mtif2         | mitochondrial translational initiation factor 2                     | 0               | 2               | 0                | -1.867693           |
| 1377 | 252966  | Cables2       | CDK5 and Abl enzyme substrate 2                                     | 0               | 2               | 0                | -1.866611           |
| 1378 | 114332  | Xlkd1         | lymphatic vessel endothelial hyaluronan receptor 1                  | 0               | 2               | 0                | -1.865851           |
| 1379 | 331529  | 4930481M05    | predicted gene 5128                                                 | 0               | 2               | 0                | -1.865428           |
| 1380 | 11542   | Adora3        | adenosine A3 receptor                                               | 0               | 2               | 0                | -1.865262           |
| 1381 | 19120   | Prm3          | protamine 3                                                         | 0               | 2               | 0                | -1.86434            |
| 1382 | 224805  | Aarsl         | alanyl-tRNA synthetase 2, mitochondrial (putative)                  | 0               | 2               | 0                | -1.864172           |
| 1383 | 94254   | Wbscr16       | Williams-Beuren syndrome chromosome region 16 homolog (human)       | 0               | 2               | 0                | -1.863468           |
| 1384 | 258564  | Olfir1015     | olfactory receptor 1015                                             | 0               | 2               | 0                | -1.863186           |
| 1385 | 109113  | Uhfr2         | ubiquitin-like, containing PHD and RING finger domains 2            | 0               | 2               | 0                | -1.862896           |
| 1386 | 435839  | UNK           | NA                                                                  | 0               | 2               | 0                | -1.86195            |
| 1387 | 277010  | Marveld1      | MARVEL (membrane-associating) domain containing 1                   | 0               | 2               | 0                | -1.861328           |
| 1388 | 16011   | Igfbp5        | insulin-like growth factor binding protein 5                        | 0               | 2               | 0                | -1.859247           |
| 1389 | 14263   | Fmo5          | flavin containing monooxygenase 5                                   | 0               | 2               | 0                | -1.858035           |
| 1390 | 14055   | Ezh1          | enhancer of zeste homolog 1 (Drosophila)                            | 0               | 2               | 0                | -1.856571           |

## Candidates for positive regulators of normal growth (DESeq)

| Rank | entrez# | Gene Symbol   | Gene name                                                                | enriched shRNAs | depleted shRNAs | no change shRNAs | average Fold Change |
|------|---------|---------------|--------------------------------------------------------------------------|-----------------|-----------------|------------------|---------------------|
| 1391 | 93840   | Ltap          | vang-like 2 (van gogh, Drosophila)                                       | 0               | 2               | 0                | -1.856476           |
| 1392 | 258850  | Olfir295      | olfactory receptor 295                                                   | 0               | 2               | 0                | -1.855094           |
| 1393 | 14167   | Fgf12         | fibroblast growth factor 12                                              | 0               | 2               | 0                | -1.854526           |
| 1394 | 17691   | Snf1lk        | salt inducible kinase 1                                                  | 0               | 2               | 0                | -1.85418            |
| 1395 | 18582   | Pde6d         | phosphodiesterase 6D, cGMP-specific, rod, delta                          | 0               | 2               | 0                | -1.854054           |
| 1396 | 26561   | Mmp23         | matrix metalloproteinase 23                                              | 0               | 2               | 0                | -1.853964           |
| 1397 | 22361   | Vnn1          | vanin 1                                                                  | 0               | 2               | 0                | -1.853226           |
| 1398 | 384894  | UNK           | NA                                                                       | 0               | 2               | 0                | -1.851958           |
| 1399 | 224753  | H2-M10.4      | histocompatibility 2, M region locus 10.4                                | 0               | 2               | 0                | -1.851832           |
| 1400 | 228361  | D030051N19Rik | autophagy/beclin 1 regulator 1                                           | 0               | 2               | 0                | -1.851607           |
| 1401 | 69957   | Cdc16         | CDC16 cell division cycle 16 homolog (S. cerevisiae)                     | 0               | 2               | 0                | -1.851507           |
| 1402 | 329416  | Nostrin       | nitric oxide synthase trafficker                                         | 0               | 2               | 0                | -1.851185           |
| 1403 | 320379  | D630028G08Rik | RIKEN cDNA D630028G08 gene                                               | 0               | 2               | 0                | -1.849663           |
| 1404 | 224836  | Usp49         | ubiquitin specific peptidase 49                                          | 0               | 2               | 0                | -1.849534           |
| 1405 | 75721   | 4932414N04Rik | RIKEN cDNA 4932414N04 gene                                               | 0               | 2               | 0                | -1.84828            |
| 1406 | 228769  | Psmf1         | proteasome (prosome, macropain) inhibitor subunit 1                      | 0               | 2               | 0                | -1.846653           |
| 1407 | 68566   | Drd1ip        | calcyon neuron-specific vesicular protein                                | 0               | 2               | 0                | -1.846009           |
| 1408 | 19387   | Rangap1       | RAN GTPase activating protein 1                                          | 0               | 2               | 0                | -1.845893           |
| 1409 | 14797   | Aes           | amino-terminal enhancer of split                                         | 0               | 2               | 0                | -1.843892           |
| 1410 | 68272   | Rbm28         | RNA binding motif protein 28                                             | 0               | 2               | 0                | -1.843825           |
| 1411 | 16658   | Mafb          | v-maf musculoaponeurotic fibrosarcoma oncogene family, protein B (avian) | 0               | 2               | 0                | -1.843548           |
| 1412 | 80880   | Ankrd47       | KN motif and ankyrin repeat domains 3                                    | 0               | 2               | 0                | -1.84215            |
| 1413 | 381101  | BC048355      | cDNA sequence BC048355                                                   | 0               | 2               | 0                | -1.841935           |
| 1414 | 76983   | Scfd1         | Sec1 family domain containing 1                                          | 0               | 2               | 0                | -1.841525           |
| 1415 | 69282   | 1700001J03Rik | RIKEN cDNA 1700001J03 gene                                               | 0               | 2               | 0                | -1.840344           |
| 1416 | 236537  | Zfp352        | zinc finger protein 352                                                  | 0               | 2               | 0                | -1.840062           |
| 1417 | 214597  | Sidt2         | SID1 transmembrane family, member 2                                      | 0               | 2               | 0                | -1.839893           |
| 1418 | 74670   | 4930432O21Rik | zinc finger prtoein 943                                                  | 0               | 2               | 0                | -1.839418           |
| 1419 | 16331   | Inpp5d        | inositol polyphosphate-5-phosphatase D                                   | 0               | 2               | 0                | -1.838783           |
| 1420 | 21406   | Tcf12         | transcription factor 12                                                  | 0               | 2               | 0                | -1.838102           |
| 1421 | 433292  | Nms           | neuromedin S                                                             | 0               | 2               | 0                | -1.836727           |
| 1422 | 383548  | Serpinb3b     | serine (or cysteine) peptidase inhibitor, clade B (ovalbumin), member 3B | 0               | 2               | 0                | -1.836424           |
| 1423 | 17222   | Anapc1        | anaphase promoting complex subunit 1                                     | 0               | 2               | 0                | -1.835981           |
| 1424 | 106489  | 5630401J11Rik | SFT2 domain containing 1                                                 | 0               | 2               | 0                | -1.83426            |

## Candidates for positive regulators of normal growth (DESeq)

| Rank | entrez# | Gene Symbol   | Gene name                                                                   | enriched shRNAs | depleted shRNAs | no change shRNAs | average Fold Change |
|------|---------|---------------|-----------------------------------------------------------------------------|-----------------|-----------------|------------------|---------------------|
| 1425 | 11910   | Atf3          | activating transcription factor 3                                           | 0               | 2               | 0                | -1.833105           |
| 1426 | 225896  | D19Erd721e    | UBX domain protein 1                                                        | 0               | 2               | 0                | -1.832633           |
| 1427 | 380655  | UNK           | NA                                                                          | 0               | 2               | 0                | -1.831805           |
| 1428 | 171190  | V1rc17        | vomeronasal 1 receptor 26                                                   | 0               | 2               | 0                | -1.830857           |
| 1429 | 435391  | LOC435391     | dual specificity phosphatase and pro isomerase domain containing 1          | 0               | 2               | 0                | -1.830143           |
| 1430 | 435707  | UNK           | NA                                                                          | 0               | 2               | 0                | -1.829142           |
| 1431 | 17220   | Mcm7          | minichromosome maintenance deficient 7 ( <i>S. cerevisiae</i> )             | 0               | 2               | 0                | -1.828448           |
| 1432 | 14679   | Gnai3         | guanine nucleotide binding protein (G protein), alpha inhibiting 3          | 0               | 2               | 0                | -1.827418           |
| 1433 | 18997   | Pou4f2        | POU domain, class 4, transcription factor 2                                 | 0               | 2               | 0                | -1.826732           |
| 1434 | 68705   | Gtf2f2        | general transcription factor IIF, polypeptide 2                             | 0               | 2               | 0                | -1.826049           |
| 1435 | 68239   | 2410039E07Rik | keratin 42                                                                  | 0               | 2               | 0                | -1.825011           |
| 1436 | 170653  | Krtap16-3     | NA                                                                          | 0               | 2               | 0                | -1.824052           |
| 1437 | 67996   | Sfrs6         | serine/arginine-rich splicing factor 6                                      | 0               | 2               | 0                | -1.823302           |
| 1438 | 114716  | Spred2        | sprouty-related, EVH1 domain containing 2                                   | 0               | 2               | 0                | -1.8229             |
| 1439 | 100087  | Kti12         | KTI12 homolog, chromatin associated ( <i>S. cerevisiae</i> )                | 0               | 2               | 0                | -1.821217           |
| 1440 | 22348   | Slc32a1       | solute carrier family 32 (GABA vesicular transporter), member 1             | 0               | 2               | 0                | -1.819712           |
| 1441 | 226999  | Slc9a2        | solute carrier family 9 (sodium/hydrogen exchanger), member 2               | 0               | 2               | 0                | -1.81933            |
| 1442 | 72145   | Wdfy3         | WD repeat and FYVE domain containing 3                                      | 0               | 2               | 0                | -1.818922           |
| 1443 | 68981   | Snrpa1        | small nuclear ribonucleoprotein polypeptide A'                              | 0               | 2               | 0                | -1.81828            |
| 1444 | 66626   | 5730403B10Rik | RIKEN cDNA 5730403B10 gene                                                  | 0               | 2               | 0                | -1.817745           |
| 1445 | 15413   | Hoxb5         | homeobox B5                                                                 | 0               | 2               | 0                | -1.817551           |
| 1446 | 17433   | Mobp          | myelin-associated oligodendrocytic basic protein                            | 0               | 2               | 0                | -1.81669            |
| 1447 | 13170   | Dbp           | D site albumin promoter binding protein                                     | 0               | 2               | 0                | -1.816627           |
| 1448 | 100710  | Aprin         | PDS5, regulator of cohesion maintenance, homolog B ( <i>S. cerevisiae</i> ) | 0               | 2               | 0                | -1.815957           |
| 1449 | 192113  | Atp12a        | ATPase, H+/K+ transporting, nongastric, alpha polypeptide                   | 0               | 2               | 0                | -1.815727           |
| 1450 | 68421   | Lmbrd1        | LMBR1 domain containing 1                                                   | 0               | 2               | 0                | -1.815718           |
| 1451 | 69269   | Scnm1         | sodium channel modifier 1                                                   | 0               | 2               | 0                | -1.815429           |
| 1452 | 74254   | Xab1          | GPN-loop GTPase 1                                                           | 0               | 2               | 0                | -1.812152           |
| 1453 | 20997   | T             | brachyury                                                                   | 0               | 2               | 0                | -1.810497           |
| 1454 | 21422   | Tcfcp2        | transcription factor CP2                                                    | 0               | 2               | 0                | -1.809284           |
| 1455 | 14137   | Fdft1         | farnesyl diphosphate farnesyl transferase 1                                 | 0               | 2               | 0                | -1.808125           |
| 1456 | 73666   | Thoc3         | THO complex 3                                                               | 0               | 2               | 0                | -1.807735           |
| 1457 | 22289   | Utx           | lysine (K)-specific demethylase 6A                                          | 0               | 2               | 0                | -1.805932           |
| 1458 | 83430   | Il23a         | interleukin 23, alpha subunit p19                                           | 0               | 2               | 0                | -1.803721           |

## Candidates for positive regulators of normal growth (DESeq)

| Rank | entrez# | Gene Symbol   | Gene name                                                      | enriched shRNAs | depleted shRNAs | no change shRNAs | average Fold Change |
|------|---------|---------------|----------------------------------------------------------------|-----------------|-----------------|------------------|---------------------|
| 1459 | 17480   | Mpl           | myeloproliferative leukemia virus oncogene                     | 0               | 2               | 0                | -1.80347            |
| 1460 | 109042  | Prkcdpb       | protein kinase C, delta binding protein                        | 0               | 2               | 0                | -1.802374           |
| 1461 | 74018   | Als2          | amyotrophic lateral sclerosis 2 (juvenile) homolog (human)     | 0               | 2               | 0                | -1.80119            |
| 1462 | 56216   | Stx1b2        | syntaxin 1B                                                    | 0               | 2               | 0                | -1.800939           |
| 1463 | 17257   | Mecp2         | methyl CpG binding protein 2                                   | 0               | 2               | 0                | -1.799611           |
| 1464 | 13839   | Epha5         | Eph receptor A5                                                | 0               | 2               | 0                | -1.799421           |
| 1465 | 238379  | UNK           | NA                                                             | 0               | 2               | 0                | -1.799315           |
| 1466 | 20591   | Jarid1c       | lysine (K)-specific demethylase 5C                             | 0               | 2               | 0                | -1.798843           |
| 1467 | 94226   | Edg8          | sphingosine-1-phosphate receptor 5                             | 0               | 2               | 0                | -1.798543           |
| 1468 | 18534   | Pck1          | phosphoenolpyruvate carboxykinase 1, cytosolic                 | 0               | 2               | 0                | -1.798033           |
| 1469 | 67205   | Utp11         | UTP11-like, U3 small nucleolar ribonucleoprotein, (yeast)      | 0               | 2               | 0                | -1.797947           |
| 1470 | 67320   | lqcf4         | IQ motif containing F4                                         | 0               | 2               | 0                | -1.797365           |
| 1471 | 21816   | Tgm1          | transglutaminase 1, K polypeptide                              | 0               | 2               | 0                | -1.797033           |
| 1472 | 12006   | Axin2         | axin2                                                          | 0               | 2               | 0                | -1.796107           |
| 1473 | 67252   | Cap2          | CAP, adenylate cyclase-associated protein, 2 (yeast)           | 0               | 2               | 0                | -1.795388           |
| 1474 | 228602  | 4930402H24Rik | RIKEN cDNA 4930402H24 gene                                     | 0               | 2               | 0                | -1.790336           |
| 1475 | 16825   | Ldb1          | LIM domain binding 1                                           | 0               | 2               | 0                | -1.789335           |
| 1476 | 28078   | Prlpl         | prolactin family 5, subfamily a, member 1                      | 0               | 2               | 0                | -1.789052           |
| 1477 | 223527  | Eny2          | enhancer of yellow 2 homolog (Drosophila)                      | 0               | 2               | 0                | -1.78828            |
| 1478 | 11486   | Ada           | adenosine deaminase                                            | 0               | 2               | 0                | -1.788224           |
| 1479 | 382588  | UNK           | NA                                                             | 0               | 2               | 0                | -1.787524           |
| 1480 | 246747  | BC054059      | adipogenin                                                     | 0               | 2               | 0                | -1.786737           |
| 1481 | 70831   | 4733401H21Rik | keratin associated protein 31-1                                | 0               | 2               | 0                | -1.784305           |
| 1482 | 19132   | Prph1         | peripherin                                                     | 0               | 2               | 0                | -1.783497           |
| 1483 | 67000   | Prlpi         | prolactin family 3, subfamily a, member 1                      | 0               | 2               | 0                | -1.782755           |
| 1484 | 21922   | Clec3b        | C-type lectin domain family 3, member b                        | 0               | 2               | 0                | -1.781601           |
| 1485 | 66421   | 2410004B18Rik | RIKEN cDNA 2410004B18 gene                                     | 0               | 2               | 0                | -1.781188           |
| 1486 | 53333   | Tomm40        | translocase of outer mitochondrial membrane 40 homolog (yeast) | 0               | 2               | 0                | -1.780945           |
| 1487 | 12990   | Csna          | casein alpha s1                                                | 0               | 2               | 0                | -1.780438           |
| 1488 | 235631  | Tsp50         | protease, serine, 50                                           | 0               | 2               | 0                | -1.779486           |
| 1489 | 56484   | Foxo3a        | forkhead box O3                                                | 0               | 2               | 0                | -1.77925            |
| 1490 | 14457   | Gas7          | growth arrest specific 7                                       | 0               | 2               | 0                | -1.778204           |
| 1491 | 232408  | Klrb1f        | killer cell lectin-like receptor subfamily B member 1F         | 0               | 2               | 0                | -1.776012           |
| 1492 | 245050  | C730027P07Rik | family with sequence similarity 198, member A                  | 0               | 2               | 0                | -1.775663           |



## Candidates for positive regulators of normal growth (DESeq)

| Rank | entrez# | Gene Symbol   | Gene name                                                                       | enriched shRNAs | depleted shRNAs | no change shRNAs | average Fold Change |
|------|---------|---------------|---------------------------------------------------------------------------------|-----------------|-----------------|------------------|---------------------|
| 1493 | 75258   | 4930563M21Rik | RIKEN cDNA 4930563M21 gene                                                      | 0               | 2               | 0                | -1.774778           |
| 1494 | 20199   | S100a5        | S100 calcium binding protein A5                                                 | 0               | 2               | 0                | -1.77473            |
| 1495 | 434311  | UNK           | NA                                                                              | 0               | 2               | 0                | -1.774459           |
| 1496 | 17533   | Mrc1          | mannose receptor, C type 1                                                      | 0               | 2               | 0                | -1.77431            |
| 1497 | 13427   | Dync1i2       | dynein cytoplasmic 1 intermediate chain 2                                       | 0               | 2               | 0                | -1.773243           |
| 1498 | 24131   | Ldb3          | LIM domain binding 3                                                            | 0               | 2               | 0                | -1.773065           |
| 1499 | 21926   | Tnf           | tumor necrosis factor                                                           | 0               | 2               | 0                | -1.772966           |
| 1500 | 71710   | Lrrcc1        | leucine rich repeat and coiled-coil domain containing 1                         | 0               | 2               | 0                | -1.771731           |
| 1501 | 64378   | Gpr88         | G-protein coupled receptor 88                                                   | 0               | 2               | 0                | -1.771573           |
| 1502 | 74600   | Mrpl47        | mitochondrial ribosomal protein L47                                             | 0               | 2               | 0                | -1.771512           |
| 1503 | 74734   | Rhoh          | ras homolog gene family, member H                                               | 0               | 2               | 0                | -1.770165           |
| 1504 | 403395  | Clec3a        | C-type lectin domain family 3, member a                                         | 0               | 2               | 0                | -1.769623           |
| 1505 | 271047  | Serpina3b     | serine (or cysteine) peptidase inhibitor, clade A, member 3B                    | 0               | 2               | 0                | -1.768843           |
| 1506 | 192976  | BC046404      | cDNA sequence BC046404                                                          | 0               | 2               | 0                | -1.767979           |
| 1507 | 56213   | Htra1         | HtrA serine peptidase 1                                                         | 0               | 2               | 0                | -1.767779           |
| 1508 | 76936   | Hnrpm         | heterogeneous nuclear ribonucleoprotein M                                       | 0               | 2               | 0                | -1.767749           |
| 1509 | 140918  | Slc7a12       | solute carrier family 7 (cationic amino acid transporter, y+ system), member 12 | 0               | 2               | 0                | -1.764149           |
| 1510 | 72729   | Cdc42se2      | CDC42 small effector 2                                                          | 0               | 2               | 0                | -1.763727           |
| 1511 | 72149   | 2610019A05Rik | STE20-related kinase adaptor alpha                                              | 0               | 2               | 0                | -1.763264           |
| 1512 | 14408   | Gabbr1        | gamma-aminobutyric acid (GABA) C receptor, subunit rho 1                        | 0               | 2               | 0                | -1.76317            |
| 1513 | 12556   | Cdh16         | cadherin 16                                                                     | 0               | 2               | 0                | -1.762838           |
| 1514 | 26430   | Parg          | poly (ADP-ribose) glycohydrolase                                                | 0               | 2               | 0                | -1.762708           |
| 1515 | 232044  | UNK           | NA                                                                              | 0               | 2               | 0                | -1.762561           |
| 1516 | 18554   | Pcsk7         | proprotein convertase subtilisin/kexin type 7                                   | 0               | 2               | 0                | -1.762031           |
| 1517 | 234582  | Ccdc102a      | coiled-coil domain containing 102A                                              | 0               | 2               | 0                | -1.761133           |
| 1518 | 225845  | Hrasls3       | phospholipase A2, group XVI                                                     | 0               | 2               | 0                | -1.759492           |
| 1519 | 434174  | LOC434174     | high-mobility group (nonhistone chromosomal) protein 1-like 1                   | 0               | 2               | 0                | -1.758617           |
| 1520 | 56195   | Ptbp2         | polypyrimidine tract binding protein 2                                          | 0               | 2               | 0                | -1.758004           |
| 1521 | 224674  | Slc37a1       | solute carrier family 37 (glycerol-3-phosphate transporter), member 1           | 0               | 2               | 0                | -1.757869           |
| 1522 | 74117   | Actr3         | ARP3 actin-related protein 3 homolog (yeast)                                    | 0               | 2               | 0                | -1.757781           |
| 1523 | 269523  | Vcp           | valosin containing protein                                                      | 0               | 2               | 0                | -1.757325           |
| 1524 | 228880  | Prkcbp1       | zinc finger, MYND-type containing 8                                             | 0               | 2               | 0                | -1.756994           |
| 1525 | 54353   | Scap2         | src family associated phosphoprotein 2                                          | 0               | 2               | 0                | -1.756759           |
| 1526 | 11777   | Ap3s1         | adaptor-related protein complex 3, sigma 1 subunit                              | 0               | 2               | 0                | -1.75511            |

## Candidates for positive regulators of normal growth (DESeq)

| Rank | entrez# | Gene Symbol   | Gene name                                                              | enriched shRNAs | depleted shRNAs | no change shRNAs | average Fold Change |
|------|---------|---------------|------------------------------------------------------------------------|-----------------|-----------------|------------------|---------------------|
| 1527 | 14866   | Gstm5         | glutathione S-transferase, mu 5                                        | 0               | 2               | 0                | -1.754774           |
| 1528 | 67974   | 5730405I09Rik | cyclin Y                                                               | 0               | 2               | 0                | -1.754619           |
| 1529 | 240263  | Fem1c         | fem-1 homolog c (C.elegans)                                            | 0               | 2               | 0                | -1.754619           |
| 1530 | 19051   | Gsbs          | protein phosphatase 1, regulatory subunit 17                           | 0               | 2               | 0                | -1.754326           |
| 1531 | 242939  | Cpz           | carboxypeptidase Z                                                     | 0               | 2               | 0                | -1.754212           |
| 1532 | 18209   | Ntn2l         | netrin 3                                                               | 0               | 2               | 0                | -1.752072           |
| 1533 | 13528   | Dtnb          | dystrobrevin, beta                                                     | 0               | 2               | 0                | -1.751853           |
| 1534 | 14262   | Fmo3          | flavin containing monooxygenase 3                                      | 0               | 2               | 0                | -1.751669           |
| 1535 | 16971   | Lrp1          | low density lipoprotein receptor-related protein 1                     | 0               | 2               | 0                | -1.75166            |
| 1536 | 242317  | LOC242317     | NA                                                                     | 0               | 2               | 0                | -1.751135           |
| 1537 | 83702   | Akr1c6        | aldo-keto reductase family 1, member C6                                | 0               | 2               | 0                | -1.750912           |
| 1538 | 14166   | Fgf11         | fibroblast growth factor 11                                            | 0               | 2               | 0                | -1.750863           |
| 1539 | 66204   | Acyp1         | acylphosphatase 1, erythrocyte (common) type                           | 0               | 2               | 0                | -1.750541           |
| 1540 | 14765   | Gpr50         | G-protein-coupled receptor 50                                          | 0               | 2               | 0                | -1.750432           |
| 1541 | 103765  | Tmem17        | transmembrane protein 17                                               | 0               | 2               | 0                | -1.750278           |
| 1542 | 80509   | Med8          | mediator of RNA polymerase II transcription, subunit 8 homolog (yeast) | 0               | 2               | 0                | -1.748873           |
| 1543 | 434436  | LOC434436     | cDNA sequence BY080835                                                 | 0               | 2               | 0                | -1.748437           |
| 1544 | 320769  | Prdx6-rs1     | peroxiredoxin 6B                                                       | 0               | 2               | 0                | -1.748276           |
| 1545 | 94353   | Hmgn3         | high mobility group nucleosomal binding domain 3                       | 0               | 2               | 0                | -1.74803            |
| 1546 | 16797   | Lat           | linker for activation of T cells                                       | 0               | 2               | 0                | -1.747886           |
| 1547 | 110886  | Gabra5        | gamma-aminobutyric acid (GABA) A receptor, subunit alpha 5             | 0               | 2               | 0                | -1.747014           |
| 1548 | 66322   | 1700011A15Rik | RIKEN cDNA 1700011A15 gene                                             | 0               | 2               | 0                | -1.746976           |
| 1549 | 56628   | LOC56628      | NA                                                                     | 0               | 2               | 0                | -1.746845           |
| 1550 | 11651   | Akt1          | thymoma viral proto-oncogene 1                                         | 0               | 2               | 0                | -1.746719           |
| 1551 | 432604  | UNK           | NA                                                                     | 0               | 2               | 0                | -1.745445           |
| 1552 | 74481   | Batf2         | basic leucine zipper transcription factor, ATF-like 2                  | 0               | 2               | 0                | -1.744933           |
| 1553 | 56488   | Nxt1          | NTF2-related export protein 1                                          | 0               | 2               | 0                | -1.744694           |
| 1554 | 436127  | UNK           | NA                                                                     | 0               | 2               | 0                | -1.743723           |
| 1555 | 213541  | Ythdf2        | YTH domain family 2                                                    | 0               | 2               | 0                | -1.742989           |
| 1556 | 435489  | LOC435489     | carbonyl reductase 1 pseudogene                                        | 0               | 2               | 0                | -1.742515           |
| 1557 | 18618   | Pemt          | phosphatidylethanolamine N-methyltransferase                           | 0               | 2               | 0                | -1.742252           |
| 1558 | 22264   | Prap1         | proline-rich acidic protein 1                                          | 0               | 2               | 0                | -1.742193           |
| 1559 | 14708   | Gng7          | guanine nucleotide binding protein (G protein), gamma 7                | 0               | 2               | 0                | -1.741837           |
| 1560 | 382038  | AK122209      | URB2 ribosome biogenesis 2 homolog (S. cerevisiae)                     | 0               | 2               | 0                | -1.741198           |

## Candidates for positive regulators of normal growth (DESeq)

| Rank | entrez# | Gene Symbol   | Gene name                                                                 | enriched shRNAs | depleted shRNAs | no change shRNAs | average Fold Change |
|------|---------|---------------|---------------------------------------------------------------------------|-----------------|-----------------|------------------|---------------------|
| 1561 | 18426   | Ovol1         | OVO homolog-like 1 (Drosophila)                                           | 0               | 2               | 0                | -1.740925           |
| 1562 | 217331  | Zc3h5         | unkempt homolog (Drosophila)                                              | 0               | 2               | 0                | -1.740456           |
| 1563 | 83762   | Otof          | otoferlin                                                                 | 0               | 2               | 0                | -1.740336           |
| 1564 | 12427   | Ccna1         | cyclin A1                                                                 | 0               | 2               | 0                | -1.739995           |
| 1565 | 217306  | Cd300e        | CD300e antigen                                                            | 0               | 2               | 0                | -1.739333           |
| 1566 | 223776  | 1300018J18Rik | RIKEN cDNA 1300018J18 gene                                                | 0               | 2               | 0                | -1.738922           |
| 1567 | 223917  | BC031593      | keratin 79                                                                | 0               | 2               | 0                | -1.738118           |
| 1568 | 192163  | Pcdha3        | protocadherin alpha 3                                                     | 0               | 2               | 0                | -1.736606           |
| 1569 | 56631   | Trim17        | tripartite motif-containing 17                                            | 0               | 2               | 0                | -1.73647            |
| 1570 | 218038  | Amph          | amphiphysin                                                               | 0               | 2               | 0                | -1.736343           |
| 1571 | 230398  | Ifna6T        | predicted gene 13280                                                      | 0               | 2               | 0                | -1.735814           |
| 1572 | 16520   | Kcnj4         | potassium inwardly-rectifying channel, subfamily J, member 4              | 0               | 2               | 0                | -1.735593           |
| 1573 | 54128   | Pmm2          | phosphomannomutase 2                                                      | 0               | 2               | 0                | -1.7348             |
| 1574 | 381286  | Serpib3c      | serine (or cysteine) peptidase inhibitor, clade B, member 3C              | 0               | 2               | 0                | -1.733636           |
| 1575 | 171187  | V1rc14        | vomer nasal 1 receptor 33                                                 | 0               | 2               | 0                | -1.733431           |
| 1576 | 24075   | Taf10         | TAF10 RNA polymerase II, TATA box binding protein (TBP)-associated factor | 0               | 2               | 0                | -1.733331           |
| 1577 | 110355  | Adrbk1        | adrenergic receptor kinase, beta 1                                        | 0               | 2               | 0                | -1.73333            |
| 1578 | 12234   | Btrc          | beta-transducin repeat containing protein                                 | 0               | 2               | 0                | -1.73332            |
| 1579 | 69009   | Thap7         | THAP domain containing 7                                                  | 0               | 2               | 0                | -1.732352           |
| 1580 | 74335   | Xrcc3         | X-ray repair complementing defective repair in Chinese hamster cells 3    | 0               | 2               | 0                | -1.731808           |
| 1581 | 101118  | 8430437G11Rik | transmembrane protein 168                                                 | 0               | 2               | 0                | -1.731694           |
| 1582 | 387512  | Tas2r135      | taste receptor, type 2, member 135                                        | 0               | 2               | 0                | -1.730082           |
| 1583 | 66094   | Lsm7          | LSM7 homolog, U6 small nuclear RNA associated (S. cerevisiae)             | 0               | 2               | 0                | -1.72837            |
| 1584 | 269437  | Plch1         | phospholipase C, eta 1                                                    | 0               | 2               | 0                | -1.727947           |
| 1585 | 15078   | H3f3a         | H3 histone, family 3A                                                     | 0               | 2               | 0                | -1.727842           |
| 1586 | 16560   | Kif1a         | kinesin family member 1A                                                  | 0               | 2               | 0                | -1.726675           |
| 1587 | 257938  | Olf1419       | olfactory receptor 1419                                                   | 0               | 2               | 0                | -1.72606            |
| 1588 | 435219  | UNK           | NA                                                                        | 0               | 2               | 0                | -1.724546           |
| 1589 | 14747   | Cmklr1        | chemokine-like receptor 1                                                 | 0               | 2               | 0                | -1.724132           |
| 1590 | 12515   | Cd69          | CD69 antigen                                                              | 0               | 2               | 0                | -1.724006           |
| 1591 | 243834  | Zfp324        | zinc finger protein 324                                                   | 0               | 2               | 0                | -1.723064           |
| 1592 | 21804   | Tgfb1i1       | transforming growth factor beta 1 induced transcript 1                    | 0               | 2               | 0                | -1.722967           |
| 1593 | 209683  | A1428795      | tetratricopeptide repeat domain 28                                        | 0               | 2               | 0                | -1.722315           |
| 1594 | 56418   | Ykt6          | YKT6 homolog (S. Cerevisiae)                                              | 0               | 2               | 0                | -1.722001           |

## Candidates for positive regulators of normal growth (DESeq)

| Rank | entrez# | Gene Symbol   | Gene name                                                         | enriched shRNAs | depleted shRNAs | no change shRNAs | average Fold Change |
|------|---------|---------------|-------------------------------------------------------------------|-----------------|-----------------|------------------|---------------------|
| 1595 | 11535   | Adm           | adrenomedullin                                                    | 0               | 2               | 0                | -1.721877           |
| 1596 | 319930  | Ceacam19      | carcinoembryonic antigen-related cell adhesion molecule 19        | 0               | 2               | 0                | -1.721707           |
| 1597 | 17259   | Mef2b         | myocyte enhancer factor 2B                                        | 0               | 2               | 0                | -1.721664           |
| 1598 | 17756   | Mtap2         | microtubule-associated protein 2                                  | 0               | 2               | 0                | -1.721607           |
| 1599 | 66873   | 1200009O22Rik | TLR4 interactor with leucine-rich repeats                         | 0               | 2               | 0                | -1.721321           |
| 1600 | 269513  | E130310K16Rik | Na <sup>+</sup> /K <sup>+</sup> transporting ATPase interacting 3 | 0               | 2               | 0                | -1.72071            |
| 1601 | 22297   | V1ra2         | vomer nasal 1 receptor 45                                         | 0               | 2               | 0                | -1.720569           |
| 1602 | 269424  | Phf17         | PHD finger protein 17                                             | 0               | 2               | 0                | -1.720081           |
| 1603 | 228136  | Zdhhc5        | zinc finger, DHC domain containing 5                              | 0               | 2               | 0                | -1.719746           |
| 1604 | 56636   | Fgf21         | fibroblast growth factor 21                                       | 0               | 2               | 0                | -1.718797           |
| 1605 | 56220   | Zfp386        | zinc finger protein 386 (Kruppel-like)                            | 0               | 2               | 0                | -1.716764           |
| 1606 | 14407   | Gabrg3        | gamma-aminobutyric acid (GABA) A receptor, subunit gamma 3        | 0               | 2               | 0                | -1.716311           |
| 1607 | 18431   | p             | oculocutaneous albinism II                                        | 0               | 2               | 0                | -1.716022           |
| 1608 | 19400   | Rapsn         | receptor-associated protein of the synapse                        | 0               | 2               | 0                | -1.715447           |
| 1609 | 12969   | Crygf         | crystallin, gamma F                                               | 0               | 2               | 0                | -1.715428           |
| 1610 | 22371   | Vwf           | Von Willebrand factor homolog                                     | 0               | 2               | 0                | -1.713978           |
| 1611 | 108078  | Olr1          | oxidized low density lipoprotein (lectin-like) receptor 1         | 0               | 2               | 0                | -1.713428           |
| 1612 | 67717   | Lipf          | lipase, gastric                                                   | 0               | 2               | 0                | -1.712205           |
| 1613 | 320858  | D930040M24Rik | l(3)mbt-like 4 (Drosophila)                                       | 0               | 2               | 0                | -1.710116           |
| 1614 | 56210   | Rev1l         | REV1 homolog (S. cerevisiae)                                      | 0               | 2               | 0                | -1.709541           |
| 1615 | 16419   | Itgb5         | integrin beta 5                                                   | 0               | 2               | 0                | -1.709215           |
| 1616 | 64139   | Ctsm          | cathepsin M                                                       | 0               | 2               | 0                | -1.708294           |
| 1617 | 70061   | Sdro          | 4short chain dehydrogenase/reductase family 9C, member 7          | 0               | 2               | 0                | -1.707206           |
| 1618 | 14201   | Fhl3          | four and a half LIM domains 3                                     | 0               | 2               | 0                | -1.706098           |
| 1619 | 23950   | Dnajb6        | DnaJ (Hsp40) homolog, subfamily B, member 6                       | 0               | 2               | 0                | -1.70547            |
| 1620 | 22315   | V2r9          | NA                                                                | 0               | 2               | 0                | -1.705422           |
| 1621 | 76123   | Gpsm2         | G-protein signalling modulator 2 (AGS3-like, C. elegans)          | 0               | 2               | 0                | -1.701867           |
| 1622 | 52513   | Ddx56         | DEAD (Asp-Glu-Ala-Asp) box polypeptide 56                         | 0               | 2               | 0                | -1.701352           |
| 1623 | 83409   | Mapbpip       | late endosomal/lysosomal adaptor, MAPK and MTOR activator 2       | 0               | 2               | 0                | -1.701143           |
| 1624 | 56351   | Ptges3        | prostaglandin E synthase 3 (cytosolic)                            | 0               | 2               | 0                | -1.699995           |
| 1625 | 319535  | Zfp182        | zinc finger protein 182                                           | 0               | 2               | 0                | -1.699202           |
| 1626 | 12014   | Bach2         | BTB and CNC homology 2                                            | 0               | 2               | 0                | -1.698465           |
| 1627 | 66462   | 2810428I15Rik | RIKEN cDNA 2810428I15 gene                                        | 0               | 2               | 0                | -1.695366           |
| 1628 | 66695   | Aspn          | asporin                                                           | 0               | 2               | 0                | -1.695335           |

## Candidates for positive regulators of normal growth (DESeq)

| Rank | entrez# | Gene Symbol   | Gene name                                                                           | enriched shRNAs | depleted shRNAs | no change shRNAs | average Fold Change |
|------|---------|---------------|-------------------------------------------------------------------------------------|-----------------|-----------------|------------------|---------------------|
| 1629 | 22757   | Zfp95         | zinc finger with KRAB and SCAN domains 5                                            | 0               | 2               | 0                | -1.695134           |
| 1630 | 20787   | Srebf1        | sterol regulatory element binding transcription factor 1                            | 0               | 2               | 0                | -1.69501            |
| 1631 | 235623  | Scap          | SREBF chaperone                                                                     | 0               | 2               | 0                | -1.694243           |
| 1632 | 435499  | LOC435499     | kinesin family member 2C pseudogene                                                 | 0               | 2               | 0                | -1.694237           |
| 1633 | 18753   | Prkcd         | protein kinase C, delta                                                             | 0               | 2               | 0                | -1.693593           |
| 1634 | 74435   | Lrrc44        | leucine-rich repeats and IQ motif containing 3                                      | 0               | 2               | 0                | -1.692568           |
| 1635 | 14168   | Fgf13         | fibroblast growth factor 13                                                         | 0               | 2               | 0                | -1.692364           |
| 1636 | 56534   | Hspb3         | heat shock protein 3                                                                | 0               | 2               | 0                | -1.692124           |
| 1637 | 13848   | Ephb6         | Eph receptor B6                                                                     | 0               | 2               | 0                | -1.690671           |
| 1638 | 26909   | Exo1          | exonuclease 1                                                                       | 0               | 2               | 0                | -1.689935           |
| 1639 | 58522   | Trim54        | tripartite motif-containing 54                                                      | 0               | 2               | 0                | -1.688745           |
| 1640 | 15495   | Hsd3b4        | hydroxy-delta-5-steroid dehydrogenase, 3 beta- and steroid delta-isomerase 4        | 0               | 2               | 0                | -1.688523           |
| 1641 | 12226   | Btg1          | B cell translocation gene 1, anti-proliferative                                     | 0               | 2               | 0                | -1.688515           |
| 1642 | 258893  | Olfir1225     | olfactory receptor 1225                                                             | 0               | 2               | 0                | -1.688016           |
| 1643 | 18035   | Nfkbia        | nuclear factor of kappa light polypeptide gene enhancer in B cells inhibitor, alpha | 0               | 2               | 0                | -1.687829           |
| 1644 | 233824  | Cog7          | component of oligomeric golgi complex 7                                             | 0               | 2               | 0                | -1.687553           |
| 1645 | 320011  | Ugcgl1        | UDP-glucose glycoprotein glucosyltransferase 1                                      | 0               | 2               | 0                | -1.687378           |
| 1646 | 12724   | Clcn2         | chloride channel 2                                                                  | 0               | 2               | 0                | -1.687282           |
| 1647 | 12715   | Ckm           | creatine kinase, muscle                                                             | 0               | 2               | 0                | -1.685367           |
| 1648 | 12564   | Cdh8          | cadherin 8                                                                          | 0               | 2               | 0                | -1.685039           |
| 1649 | 70419   | 2810408A11Rik | RIKEN cDNA 2810408A11 gene                                                          | 0               | 2               | 0                | -1.684983           |
| 1650 | 57916   | Tnfrsf13b     | tumor necrosis factor receptor superfamily, member 13b                              | 0               | 2               | 0                | -1.683719           |
| 1651 | 76797   | 2410137M14Rik | RIKEN cDNA 2410137M14 gene                                                          | 0               | 2               | 0                | -1.683533           |
| 1652 | 213019  | Pdlim2        | PDZ and LIM domain 2                                                                | 0               | 2               | 0                | -1.683258           |
| 1653 | 20970   | Sdc3          | syndecan 3                                                                          | 0               | 2               | 0                | -1.683153           |
| 1654 | 26406   | Map3k3        | mitogen-activated protein kinase kinase kinase 3                                    | 0               | 2               | 0                | -1.681609           |
| 1655 | 13998   | Fgd6          | FYVE, RhoGEF and PH domain containing 6                                             | 0               | 2               | 0                | -1.68096            |
| 1656 | 18000   | 39326         | septin 2                                                                            | 0               | 2               | 0                | -1.680706           |
| 1657 | 433641  | UNK           | NA                                                                                  | 0               | 2               | 0                | -1.680633           |
| 1658 | 21427   | Vps72         | vacuolar protein sorting 72 (yeast)                                                 | 0               | 2               | 0                | -1.680166           |
| 1659 | 94176   | Dock2         | dedicator of cyto-kinesis 2                                                         | 0               | 2               | 0                | -1.679529           |
| 1660 | 53375   | Mtx2          | metaxin 2                                                                           | 0               | 2               | 0                | -1.677852           |
| 1661 | 109346  | Ankrd39       | ankyrin repeat domain 39                                                            | 0               | 2               | 0                | -1.676914           |
| 1662 | 237523  | Ptprq         | protein tyrosine phosphatase, receptor type, Q                                      | 0               | 2               | 0                | -1.676638           |

## Candidates for positive regulators of normal growth (DESeq)

| Rank | entrez# | Gene Symbol   | Gene name                                                           | enriched shRNAs | depleted shRNAs | no change shRNAs | average Fold Change |
|------|---------|---------------|---------------------------------------------------------------------|-----------------|-----------------|------------------|---------------------|
| 1663 | 209357  | Gtf2h3        | general transcription factor IIH, polypeptide 3                     | 0               | 2               | 0                | -1.676126           |
| 1664 | 68653   | Samm50        | sorting and assembly machinery component 50 homolog (S. cerevisiae) | 0               | 2               | 0                | -1.675899           |
| 1665 | 116903  | Calcb         | calcitonin-related polypeptide, beta                                | 0               | 2               | 0                | -1.675185           |
| 1666 | 434656  | UNK           | NA                                                                  | 0               | 2               | 0                | -1.674122           |
| 1667 | 12400   | Cbfb          | core binding factor beta                                            | 0               | 2               | 0                | -1.673257           |
| 1668 | 69754   | Fbxo7         | F-box protein 7                                                     | 0               | 2               | 0                | -1.672923           |
| 1669 | 192156  | Mvd           | mevalonate (diphospho) decarboxylase                                | 0               | 2               | 0                | -1.672811           |
| 1670 | 12615   | Cenpa         | centromere protein A                                                | 0               | 2               | 0                | -1.672604           |
| 1671 | 15267   | Hist2h2aa1    | histone cluster 2, H2aa1                                            | 0               | 2               | 0                | -1.672547           |
| 1672 | 18053   | Ngfr          | nerve growth factor receptor (TNFR superfamily, member 16)          | 0               | 2               | 0                | -1.67139            |
| 1673 | 14657   | Glr4          | glycine receptor, alpha 4 subunit                                   | 0               | 2               | 0                | -1.668352           |
| 1674 | 56335   | Mettl3        | methyltransferase like 3                                            | 0               | 2               | 0                | -1.667339           |
| 1675 | 107305  | Vps37c        | vacuolar protein sorting 37C (yeast)                                | 0               | 2               | 0                | -1.666267           |
| 1676 | 56176   | Pigp          | phosphatidylinositol glycan anchor biosynthesis, class P            | 0               | 2               | 0                | -1.665546           |
| 1677 | 242406  | 1110029E03Rik | RGP1 retrograde golgi transport homolog (S. cerevisiae)             | 0               | 2               | 0                | -1.664589           |
| 1678 | 228061  | Agps          | alkylglycerone phosphate synthase                                   | 0               | 2               | 0                | -1.664331           |
| 1679 | 56290   | Prp15         | NA                                                                  | 0               | 2               | 0                | -1.663614           |
| 1680 | 19661   | Rbp3          | retinol binding protein 3, interstitial                             | 0               | 2               | 0                | -1.663176           |
| 1681 | 12269   | C4bp          | complement component 4 binding protein                              | 0               | 2               | 0                | -1.661882           |
| 1682 | 435625  | UNK           | NA                                                                  | 0               | 2               | 0                | -1.661787           |
| 1683 | 15450   | Lipc          | lipase, hepatic                                                     | 0               | 2               | 0                | -1.660738           |
| 1684 | 13163   | Daxx          | Fas death domain-associated protein                                 | 0               | 2               | 0                | -1.659635           |
| 1685 | 67017   | 2010011I20Rik | RIKEN cDNA 2010011I20 gene                                          | 0               | 2               | 0                | -1.65724            |
| 1686 | 244216  | G630024C07Rik | zinc finger protein 771                                             | 0               | 2               | 0                | -1.656296           |
| 1687 | 15110   | Hand1         | heart and neural crest derivatives expressed transcript 1           | 0               | 2               | 0                | -1.655618           |
| 1688 | 13168   | Dbil5         | diazepam binding inhibitor-like 5                                   | 0               | 2               | 0                | -1.654467           |
| 1689 | 27062   | Cadps         | Ca2+-dependent secretion activator                                  | 0               | 2               | 0                | -1.653611           |
| 1690 | 12539   | Cdc37         | cell division cycle 37 homolog (S. cerevisiae)                      | 0               | 2               | 0                | -1.652867           |
| 1691 | 338365  | Slc41a2       | solute carrier family 41, member 2                                  | 0               | 2               | 0                | -1.652571           |
| 1692 | 23853   | Def6          | differentially expressed in FDCP 6                                  | 0               | 2               | 0                | -1.652245           |
| 1693 | 15424   | Hoxc5         | homeobox C5                                                         | 0               | 2               | 0                | -1.651908           |
| 1694 | 67648   | 4930542C12Rik | RIKEN cDNA 4930542C12 gene                                          | 0               | 2               | 0                | -1.651773           |
| 1695 | 75406   | Ndufs7        | NADH dehydrogenase (ubiquinone) Fe-S protein 7                      | 0               | 2               | 0                | -1.651073           |
| 1696 | 436255  | UNK           | NA                                                                  | 0               | 2               | 0                | -1.650309           |

## Candidates for positive regulators of normal growth (DESeq)

| Rank | entrez# | Gene Symbol         | Gene name                                                               | enriched shRNAs | depleted shRNAs | no change shRNAs | average Fold Change |
|------|---------|---------------------|-------------------------------------------------------------------------|-----------------|-----------------|------------------|---------------------|
| 1697 | 15116   | Has1                | hyaluronan synthase1                                                    | 0               | 2               | 0                | -1.650065           |
| 1698 | 226977  | Actr1b              | ARP1 actin-related protein 1 homolog B, centractin beta (yeast)         | 0               | 2               | 0                | -1.649153           |
| 1699 | 13649   | Egfr                | epidermal growth factor receptor                                        | 0               | 2               | 0                | -1.649139           |
| 1700 | 59047   | Pnkp                | polynucleotide kinase 3'-phosphatase                                    | 0               | 2               | 0                | -1.649094           |
| 1701 | 103149  | Upb1                | ureidopropionase, beta                                                  | 0               | 2               | 0                | -1.648996           |
| 1702 | 269328  | Muc15               | mucin 15                                                                | 0               | 2               | 0                | -1.6489             |
| 1703 | 67272   | Cmtm5               | CKLF-like MARVEL transmembrane domain containing 5                      | 0               | 2               | 0                | -1.647601           |
| 1704 | 16569   | Kif3b               | kinesin family member 3B                                                | 0               | 2               | 0                | -1.64725            |
| 1705 | 66461   | Ptpmt1              | protein tyrosine phosphatase, mitochondrial 1                           | 0               | 2               | 0                | -1.647023           |
| 1706 | 269604  | Gpr157              | G protein-coupled receptor 157                                          | 0               | 2               | 0                | -1.644573           |
| 1707 | 70986   | 4931422A03Rik       | RIKEN cDNA 4931422A03 gene                                              | 0               | 2               | 0                | -1.644397           |
| 1708 | 14566   | Gdf9                | growth differentiation factor 9                                         | 0               | 2               | 0                | -1.644079           |
| 1709 | 18231   | Nxph1               | neurexophilin 1                                                         | 0               | 2               | 0                | -1.643944           |
| 1710 | 257662  | GA_x5J8B7W4T2P-8476 | olfactory receptor 1290                                                 | 0               | 2               | 0                | -1.643773           |
| 1711 | 232685  | AB041803            | cDNA sequence AB041803                                                  | 0               | 2               | 0                | -1.640875           |
| 1712 | 80902   | Zfp202              | zinc finger protein 202                                                 | 0               | 2               | 0                | -1.638682           |
| 1713 | 268301  | C820004L04Rik       | sosondowah ankyrin repeat domain family member C                        | 0               | 2               | 0                | -1.637894           |
| 1714 | 13388   | Dll1                | delta-like 1 (Drosophila)                                               | 0               | 2               | 0                | -1.637584           |
| 1715 | 11799   | Birc5               | baculoviral IAP repeat-containing 5                                     | 0               | 2               | 0                | -1.637578           |
| 1716 | 117147  | Acsm1               | acyl-CoA synthetase medium-chain family member 1                        | 0               | 2               | 0                | -1.637509           |
| 1717 | 18633   | Pex16               | peroxisomal biogenesis factor 16                                        | 0               | 2               | 0                | -1.637426           |
| 1718 | 23923   | Aadat               | aminoadipate aminotransferase                                           | 0               | 2               | 0                | -1.636564           |
| 1719 | 93724   | Pcdhga12            | protocadherin gamma subfamily A, 12                                     | 0               | 2               | 0                | -1.636333           |
| 1720 | 15381   | Hnrpc               | heterogeneous nuclear ribonucleoprotein C                               | 0               | 2               | 0                | -1.635894           |
| 1721 | 59024   | Med12               | mediator of RNA polymerase II transcription, subunit 12 homolog (yeast) | 0               | 2               | 0                | -1.635527           |
| 1722 | 13120   | Cyp4b1              | cytochrome P450, family 4, subfamily b, polypeptide 1                   | 0               | 2               | 0                | -1.634753           |
| 1723 | 12728   | Clcn5               | chloride channel 5                                                      | 0               | 2               | 0                | -1.633534           |
| 1724 | 108686  | A430106J12Rik       | coiled coil domain containing 88A                                       | 0               | 2               | 0                | -1.633054           |
| 1725 | 16981   | Lrrn3               | leucine rich repeat protein 3, neuronal                                 | 0               | 2               | 0                | -1.632779           |
| 1726 | 66229   | Rpl7l1              | ribosomal protein L7-like 1                                             | 0               | 2               | 0                | -1.632523           |
| 1727 | 66515   | Cul7                | cullin 7                                                                | 0               | 2               | 0                | -1.632335           |
| 1728 | 17986   | Ndph                | Norrie disease (pseudoglioma) (human)                                   | 0               | 2               | 0                | -1.630666           |
| 1729 | 50781   | Dkk3                | dickkopf homolog 3 (Xenopus laevis)                                     | 0               | 2               | 0                | -1.627104           |
| 1730 | 113865  | V1rc8               | vomer nasal 1 receptor 25                                               | 0               | 2               | 0                | -1.624109           |

## Candidates for positive regulators of normal growth (DESeq)

| Rank | entrez# | Gene Symbol   | Gene name                                                                                     | enriched shRNAs | depleted shRNAs | no change shRNAs | average Fold Change |
|------|---------|---------------|-----------------------------------------------------------------------------------------------|-----------------|-----------------|------------------|---------------------|
| 1731 | 26444   | PsmA7         | proteasome (prosome, macropain) subunit, alpha type 7                                         | 0               | 2               | 0                | -1.623931           |
| 1732 | 107831  | Bai1          | brain-specific angiogenesis inhibitor 1                                                       | 0               | 2               | 0                | -1.620845           |
| 1733 | 56513   | Pard6a        | par-6 (partitioning defective 6,) homolog alpha (C. elegans)                                  | 0               | 2               | 0                | -1.620242           |
| 1734 | 330552  | A230097C02    | predicted gene 9801                                                                           | 0               | 2               | 0                | -1.618867           |
| 1735 | 67579   | Cpeb4         | cytoplasmic polyadenylation element binding protein 4                                         | 0               | 2               | 0                | -1.618402           |
| 1736 | 22115   | Tssk2         | testis-specific serine kinase 2                                                               | 0               | 2               | 0                | -1.61815            |
| 1737 | 57373   | D930014E17Rik | RIKEN cDNA D930014E17 gene                                                                    | 0               | 2               | 0                | -1.617722           |
| 1738 | 66154   | Tmem14c       | transmembrane protein 14C                                                                     | 0               | 2               | 0                | -1.617709           |
| 1739 | 67979   | Atad1         | ATPase family, AAA domain containing 1                                                        | 0               | 2               | 0                | -1.617501           |
| 1740 | 11854   | Rhod          | ras homolog gene family, member D                                                             | 0               | 2               | 0                | -1.617147           |
| 1741 | 23795   | Agr2          | anterior gradient 2 (Xenopus laevis)                                                          | 0               | 2               | 0                | -1.616512           |
| 1742 | 75188   | 1700009J07Rik | RIKEN cDNA 1700009J07 gene                                                                    | 0               | 2               | 0                | -1.61597            |
| 1743 | 68193   | Rpl24         | ribosomal protein L24                                                                         | 0               | 2               | 0                | -1.615366           |
| 1744 | 16617   | Klk1b24       | kallikrein 1-related peptidase b24                                                            | 0               | 2               | 0                | -1.614413           |
| 1745 | 56844   | Tssc4         | tumor-suppressing subchromosomal transferable fragment 4                                      | 0               | 2               | 0                | -1.614203           |
| 1746 | 235779  | LOC235779     | NLR family, pyrin domain containing 4G                                                        | 0               | 2               | 0                | -1.612368           |
| 1747 | 258955  | OlfR531       | olfactory receptor 531                                                                        | 0               | 2               | 0                | -1.611926           |
| 1748 | 55946   | Ap3m1         | adaptor-related protein complex 3, mu 1 subunit                                               | 0               | 2               | 0                | -1.611692           |
| 1749 | 329333  | B230218O03    | NA                                                                                            | 0               | 2               | 0                | -1.610873           |
| 1750 | 320974  | B430119L13Rik | leucine rich repeat neuronal 4                                                                | 0               | 2               | 0                | -1.61059            |
| 1751 | 20664   | Sox1          | SRY-box containing gene 1                                                                     | 0               | 2               | 0                | -1.610434           |
| 1752 | 67310   | Prlpc2        | prolactin family8, subfamily a, member 9                                                      | 0               | 2               | 0                | -1.610022           |
| 1753 | 216144  | AJ543404      | vomer nasal 2, receptor 81                                                                    | 0               | 2               | 0                | -1.609089           |
| 1754 | 258578  | OlfR1517      | NA                                                                                            | 0               | 2               | 0                | -1.605744           |
| 1755 | 15451   | Hpn           | hepsin                                                                                        | 0               | 2               | 0                | -1.605618           |
| 1756 | 93722   | Pcdhga10      | protocadherin gamma subfamily A, 10                                                           | 0               | 2               | 0                | -1.604115           |
| 1757 | 13877   | Erh           | enhancer of rudimentary homolog (Drosophila)                                                  | 0               | 2               | 0                | -1.602935           |
| 1758 | 11596   | Ager          | advanced glycosylation end product-specific receptor                                          | 0               | 2               | 0                | -1.602568           |
| 1759 | 79263   | Trim39        | tripartite motif-containing 39                                                                | 0               | 2               | 0                | -1.602499           |
| 1760 | 72472   | Slc16a10      | solute carrier family 16 (monocarboxylic acid transporters), member 10                        | 0               | 2               | 0                | -1.600115           |
| 1761 | 18020   | Nfatc2ip      | nuclear factor of activated T cells, cytoplasmic, calcineurin dependent 2 interacting protein | 0               | 2               | 0                | -1.599657           |
| 1762 | 386285  | UNK           | NA                                                                                            | 0               | 2               | 0                | -1.59838            |
| 1763 | 67943   | Mesdc2        | mesoderm development candidate 2                                                              | 0               | 2               | 0                | -1.597936           |
| 1764 | 232853  | 5730403M16Rik | zinc finger protein 954                                                                       | 0               | 2               | 0                | -1.597119           |



## Candidates for positive regulators of normal growth (DESeq)

| Rank | entrez# | Gene Symbol   | Gene name                                                                                       | enriched shRNAs | depleted shRNAs | no change shRNAs | average Fold Change |
|------|---------|---------------|-------------------------------------------------------------------------------------------------|-----------------|-----------------|------------------|---------------------|
| 1765 | 171095  | Il17rc        | interleukin 17 receptor C                                                                       | 0               | 2               | 0                | -1.596801           |
| 1766 | 50778   | Rgs1          | regulator of G-protein signaling 1                                                              | 0               | 2               | 0                | -1.596676           |
| 1767 | 15444   | Hpca          | hippocalcin                                                                                     | 0               | 2               | 0                | -1.595471           |
| 1768 | 57435   | S3-12         | perilipin 4                                                                                     | 0               | 2               | 0                | -1.594548           |
| 1769 | 14763   | Gpr37         | G protein-coupled receptor 37                                                                   | 0               | 2               | 0                | -1.594522           |
| 1770 | 69046   | Hbld2         | iron-sulfur cluster assembly 1 homolog (S. cerevisiae)                                          | 0               | 2               | 0                | -1.592788           |
| 1771 | 67759   | 5033414D02Rik | RIKEN cDNA 5033414D02 gene                                                                      | 0               | 2               | 0                | -1.592581           |
| 1772 | 320040  | 9930039A11Rik | ring finger protein 222                                                                         | 0               | 2               | 0                | -1.592407           |
| 1773 | 228770  | Rspo4         | R-spondin family, member 4                                                                      | 0               | 2               | 0                | -1.59073            |
| 1774 | 19206   | Ptch1         | patched homolog 1                                                                               | 0               | 2               | 0                | -1.590525           |
| 1775 | 243274  | Tmem132d      | transmembrane protein 132D                                                                      | 0               | 2               | 0                | -1.589386           |
| 1776 | 12348   | Car11         | carbonic anhydrase 11                                                                           | 0               | 2               | 0                | -1.589073           |
| 1777 | 218865  | Chdh          | choline dehydrogenase                                                                           | 0               | 2               | 0                | -1.58815            |
| 1778 | 223870  | Senp1         | SUMO1/sentrin specific peptidase 1                                                              | 0               | 2               | 0                | -1.586278           |
| 1779 | 23892   | Grem1         | gremlin 1                                                                                       | 0               | 2               | 0                | -1.585858           |
| 1780 | 53621   | Cnot4         | CCR4-NOT transcription complex, subunit 4                                                       | 0               | 2               | 0                | -1.584597           |
| 1781 | 76441   | Daam2         | dishevelled associated activator of morphogenesis 2                                             | 0               | 2               | 0                | -1.584403           |
| 1782 | 320209  | Ddx11         | DEAD/H (Asp-Glu-Ala-Asp/His) box polypeptide 11 (CHL1-like helicase homolog, S. cerevisiae)     | 0               | 2               | 0                | -1.583721           |
| 1783 | 15463   | Hrb           | ArfGAP with FG repeats 1                                                                        | 0               | 2               | 0                | -1.583237           |
| 1784 | 245666  | lqsec2        | IQ motif and Sec7 domain 2                                                                      | 0               | 2               | 0                | -1.582167           |
| 1785 | 54381   | Pgcp          | plasma glutamate carboxypeptidase                                                               | 0               | 2               | 0                | -1.580478           |
| 1786 | 72139   | 2610044O15Rik | RIKEN cDNA 2610044O15 gene                                                                      | 0               | 2               | 0                | -1.577196           |
| 1787 | 105278  | Ccrk          | cyclin-dependent kinase 20                                                                      | 0               | 2               | 0                | -1.576677           |
| 1788 | 227154  | Als2cr2       | STE20-related kinase adaptor beta                                                               | 0               | 2               | 0                | -1.575784           |
| 1789 | 140858  | Wdr5          | WD repeat domain 5                                                                              | 0               | 2               | 0                | -1.575418           |
| 1790 | 27418   | Mkln1         | muskelin 1, intracellular mediator containing kelch motifs                                      | 0               | 2               | 0                | -1.574964           |
| 1791 | 12259   | C1qa          | complement component 1, q subcomponent, alpha polypeptide                                       | 0               | 2               | 0                | -1.574791           |
| 1792 | 18088   | Nkx2-2        | NK2 transcription factor related, locus 2 (Drosophila)                                          | 0               | 2               | 0                | -1.572989           |
| 1793 | 215632  | Psd4          | pleckstrin and Sec7 domain containing 4                                                         | 0               | 2               | 0                | -1.572606           |
| 1794 | 234362  | Al449175      | zinc finger protein 868                                                                         | 0               | 2               | 0                | -1.572585           |
| 1795 | 208595  | MTERF         | predicted gene 9897                                                                             | 0               | 2               | 0                | -1.571863           |
| 1796 | 26456   | Sema4g        | sema domain, immunoglobulin domain (Ig), transmembrane domain (TM) and short cytoplasmic domain | 0               | 2               | 0                | -1.570834           |
| 1797 | 17695   | Msemb         | beta-microseminoprotein                                                                         | 0               | 2               | 0                | -1.570806           |
| 1798 | 102693  | Phldb1        | pleckstrin homology-like domain, family B, member 1                                             | 0               | 2               | 0                | -1.569142           |

## Candidates for positive regulators of normal growth (DESeq)

| Rank | entrez# | Gene Symbol   | Gene name                                                                | enriched shRNAs | depleted shRNAs | no change shRNAs | average Fold Change |
|------|---------|---------------|--------------------------------------------------------------------------|-----------------|-----------------|------------------|---------------------|
| 1799 | 71960   | Myh14         | myosin, heavy polypeptide 14                                             | 0               | 2               | 0                | -1.568063           |
| 1800 | 68323   | Nudt22        | nudix (nucleoside diphosphate linked moiety X)-type motif 22             | 0               | 2               | 0                | -1.567315           |
| 1801 | 20751   | Spr           | sepiapterin reductase                                                    | 0               | 2               | 0                | -1.566111           |
| 1802 | 216516  | 4930562D19Rik | coiled-coil domain containing 157                                        | 0               | 2               | 0                | -1.564661           |
| 1803 | 14601   | Ghrh          | growth hormone releasing hormone                                         | 0               | 2               | 0                | -1.561686           |
| 1804 | 210619  | UNK           | NA                                                                       | 0               | 2               | 0                | -1.559366           |
| 1805 | 227800  | Rabgap1       | RAB GTPase activating protein 1                                          | 0               | 2               | 0                | -1.558719           |
| 1806 | 208583  | Nek11         | NIMA (never in mitosis gene a)-related expressed kinase 11               | 0               | 2               | 0                | -1.558344           |
| 1807 | 17127   | Smad3         | MAD homolog 3 (Drosophila)                                               | 0               | 2               | 0                | -1.557398           |
| 1808 | 66214   | 1190002H23Rik | RIKEN cDNA 1190002H23 gene                                               | 0               | 2               | 0                | -1.557142           |
| 1809 | 231600  | Chfr          | checkpoint with forkhead and ring finger domains                         | 0               | 2               | 0                | -1.556132           |
| 1810 | 140742  | Sesn1         | sestrin 1                                                                | 0               | 2               | 0                | -1.555998           |
| 1811 | 19185   | Psmc4         | proteasome (prosome, macropain) 26S subunit, non-ATPase, 4               | 0               | 2               | 0                | -1.554653           |
| 1812 | 17904   | Myl6          | myosin, light polypeptide 6, alkali, smooth muscle and non-muscle        | 0               | 2               | 0                | -1.55419            |
| 1813 | 170935  | Grid2ip       | glutamate receptor, ionotropic, delta 2 (Grid2) interacting protein 1    | 0               | 2               | 0                | -1.553305           |
| 1814 | 237222  | Odf1          | oral-facial-digital syndrome 1 gene homolog (human)                      | 0               | 2               | 0                | -1.552541           |
| 1815 | 67231   | Tbc1d20       | TBC1 domain family, member 20                                            | 0               | 2               | 0                | -1.549264           |
| 1816 | 71111   | Gpr39         | G protein-coupled receptor 39                                            | 0               | 2               | 0                | -1.548029           |
| 1817 | 12824   | Col2a1        | collagen, type II, alpha 1                                               | 0               | 2               | 0                | -1.546316           |
| 1818 | 272661  | UNK           | NA                                                                       | 0               | 2               | 0                | -1.545982           |
| 1819 | 17134   | Mafg          | v-maf musculoaponeurotic fibrosarcoma oncogene family, protein G (avian) | 0               | 2               | 0                | -1.54539            |
| 1820 | 12337   | Capn5         | calpain 5                                                                | 0               | 2               | 0                | -1.545197           |
| 1821 | 11513   | Adcy7         | adenylate cyclase 7                                                      | 0               | 2               | 0                | -1.544282           |
| 1822 | 68614   | Letmd1        | LETM1 domain containing 1                                                | 0               | 2               | 0                | -1.541796           |
| 1823 | 99899   | Ifi44         | interferon-induced protein 44                                            | 0               | 2               | 0                | -1.541503           |
| 1824 | 18566   | Pdcd1         | programmed cell death 1                                                  | 0               | 2               | 0                | -1.541412           |
| 1825 | 66618   | 2610209M04Rik | small nuclear ribonucleoprotein 27 (U4/U6.U5)                            | 0               | 2               | 0                | -1.539962           |
| 1826 | 280121  | LOC280121     | ribosomal protein, large, P1, pseudogene 1                               | 0               | 2               | 0                | -1.538674           |
| 1827 | 109648  | Npy           | neuropeptide Y                                                           | 0               | 2               | 0                | -1.536349           |
| 1828 | 26438   | Psg18         | pregnancy specific glycoprotein 18                                       | 0               | 2               | 0                | -1.535139           |
| 1829 | 241846  | Lsm14b        | LSM14 homolog B (SCD6, S. cerevisiae)                                    | 0               | 2               | 0                | -1.530989           |
| 1830 | 107146  | Glyat         | glycine-N-acyltransferase                                                | 0               | 2               | 0                | -1.530548           |
| 1831 | 56417   | Adar          | adenosine deaminase, RNA-specific                                        | 0               | 2               | 0                | -1.528194           |
| 1832 | 76629   | 1700111I05Rik | Williams-Beuren syndrome chromosome region 28 (human)                    | 0               | 2               | 0                | -1.528067           |

Candidates for positive regulators of normal growth (DESeq)

| Rank | entrez# | Gene Symbol   | Gene name                                                | enriched shRNAs | depleted shRNAs | no change shRNAs | average Fold Change |
|------|---------|---------------|----------------------------------------------------------|-----------------|-----------------|------------------|---------------------|
| 1833 | 17858   | Mx2           | myxovirus (influenza virus) resistance 2                 | 0               | 2               | 0                | -1.523541           |
| 1834 | 239652  | Zfp641        | zinc finger protein 641                                  | 0               | 2               | 0                | -1.523288           |
| 1835 | 69694   | Tatdn1        | TatD DNase domain containing 1                           | 0               | 2               | 0                | -1.52259            |
| 1836 | 233081  | Ffar1         | free fatty acid receptor 1                               | 0               | 2               | 0                | -1.522564           |
| 1837 | 28071   | Twistnb       | TWIST neighbor                                           | 0               | 2               | 0                | -1.520386           |
| 1838 | 259083  | Olfir547      | olfactory receptor 547                                   | 0               | 2               | 0                | -1.519335           |
| 1839 | 170757  | Eld1          | EGF, latrophilin seven transmembrane domain containing 1 | 0               | 2               | 0                | -1.519318           |
| 1840 | 93898   | Lass1         | LAG1 homolog, ceramide synthase 1                        | 0               | 2               | 0                | -1.518135           |
| 1841 | 15081   | H3f3b         | H3 histone, family 3B                                    | 0               | 2               | 0                | -1.517545           |
| 1842 | 110648  | Lmx1a         | LIM homeobox transcription factor 1 alpha                | 0               | 2               | 0                | -1.51385            |
| 1843 | 224024  | Scarf2        | scavenger receptor class F, member 2                     | 0               | 2               | 0                | -1.513785           |
| 1844 | 258663  | Olfir739      | olfactory receptor 739                                   | 0               | 2               | 0                | -1.513486           |
| 1845 | 18821   | Pln           | phospholamban                                            | 0               | 2               | 0                | -1.513449           |
| 1846 | 56371   | Fzr1          | fizzy/cell division cycle 20 related 1 (Drosophila)      | 0               | 2               | 0                | -1.510983           |
| 1847 | 216166  | 6330514A18Rik | polo-like kinase 5 (Drosophila)                          | 0               | 2               | 0                | -1.51052            |
| 1848 | 13013   | Cst9          | cystatin 9                                               | 0               | 2               | 0                | -1.510093           |
| 1849 | 75079   | Zfp509        | zinc finger and BTB domain containing 49                 | 0               | 2               | 0                | -1.50986            |
| 1850 | 53404   | Atoh7         | atonal homolog 7 (Drosophila)                            | 0               | 2               | 0                | -1.50932            |
| 1851 | 17764   | Mtf1          | metal response element binding transcription factor 1    | 0               | 2               | 0                | -1.509176           |
| 1852 | 407243  | A1840826      | transmembrane protein 189                                | 0               | 2               | 0                | -1.50575            |
| 1853 | 224630  | Bnip1         | BCL2/adenovirus E1B interacting protein 1                | 0               | 2               | 0                | -1.503173           |
| 1854 | 20907   | Stx1a         | syntaxin 1A (brain)                                      | 0               | 2               | 0                | -1.50256            |

## Candidates for negative regulators of normal growth (DESeq)

| Rank | entrez# | Gene Symbol   | Gene name                                                                             | enriched shRNAs | depleted shRNAs | no change shRNAs | average Fold Change |
|------|---------|---------------|---------------------------------------------------------------------------------------|-----------------|-----------------|------------------|---------------------|
| 1    | 257635  | Sdsl          | serine dehydratase-like                                                               | 2               | 0               | 0                | 5.73702             |
| 2    | 12387   | Ctnnb1        | catenin (cadherin associated protein), beta 1                                         | 4               | 0               | 0                | 4.974981            |
| 3    | 18155   | Pnoc          | prepronociceptin                                                                      | 2               | 0               | 0                | 4.543174            |
| 4    | 20667   | Sox12         | SRY-box containing gene 12                                                            | 2               | 0               | 0                | 4.456768            |
| 5    | 22781   | Zfpn1a4       | IKAROS family zinc finger 4                                                           | 2               | 0               | 0                | 4.335112            |
| 6    | 76980   | 3110006E14Rik | ubiquitin-conjugating enzyme E2Q family-like 1                                        | 2               | 0               | 0                | 4.33407             |
| 7    | 50708   | Hist1h1c      | histone cluster 1, H1c                                                                | 2               | 0               | 0                | 4.068651            |
| 8    | 27423   | Klra15        | killer cell lectin-like receptor, subfamily A, member 15                              | 2               | 0               | 0                | 3.952384            |
| 9    | 100689  | Spon2         | spondin 2, extracellular matrix protein                                               | 2               | 0               | 0                | 3.883759            |
| 10   | 66990   | Tmem134       | transmembrane protein 134                                                             | 2               | 0               | 0                | 3.736325            |
| 11   | 232910  | Ap2s1         | adaptor-related protein complex 2, sigma 1 subunit                                    | 2               | 0               | 0                | 3.732974            |
| 12   | 74195   | Elp3          | elongation protein 3 homolog ( <i>S. cerevisiae</i> )                                 | 2               | 0               | 0                | 3.670223            |
| 13   | 26465   | Zfp146        | zinc finger protein 146                                                               | 2               | 0               | 0                | 3.639934            |
| 14   | 27382   | Tcl1b5        | T cell leukemia/lymphoma 1B, 5                                                        | 2               | 0               | 0                | 3.487731            |
| 15   | 68066   | D11Erd333e    | solute carrier family 25, member 39                                                   | 2               | 0               | 0                | 3.458957            |
| 16   | 109593  | Lmo3          | LIM domain only 3                                                                     | 2               | 0               | 0                | 3.453422            |
| 17   | 330721  | Nek5          | NIMA (never in mitosis gene a)-related expressed kinase 5                             | 2               | 0               | 0                | 3.408763            |
| 18   | 21950   | Tnfsf9        | tumor necrosis factor (ligand) superfamily, member 9                                  | 2               | 0               | 0                | 3.394261            |
| 19   | 18073   | Nid1          | nidogen 1                                                                             | 2               | 0               | 0                | 3.37397             |
| 20   | 213012  | Abhd10        | abhydrolase domain containing 10                                                      | 2               | 0               | 0                | 3.336467            |
| 21   | 26934   | Racgap1       | Rac GTPase-activating protein 1                                                       | 2               | 0               | 0                | 3.260051            |
| 22   | 212167  | A530088I07Rik | pigeon homolog ( <i>Drosophila</i> )                                                  | 2               | 0               | 0                | 3.212685            |
| 23   | 327900  | 9630054F20Rik | ubiquitin domain containing 2                                                         | 2               | 0               | 0                | 3.149826            |
| 24   | 109280  | 9330176C04Rik | solute carrier family 22 (organic cation transporter), member 13b                     | 2               | 0               | 0                | 3.120845            |
| 25   | 114663  | Impa2         | inositol (myo)-1(or 4)-monophosphatase 2                                              | 2               | 0               | 0                | 3.100542            |
| 26   | 215351  | Senp6         | SUMO/sentrin specific peptidase 6                                                     | 2               | 0               | 0                | 3.09762             |
| 27   | 382686  | LOC382686     | RIKEN cDNA 3110053B16 gene                                                            | 3               | 0               | 0                | 3.094671            |
| 28   | 19156   | Psap          | prosaposin                                                                            | 3               | 0               | 0                | 3.059448            |
| 29   | 272790  | Magee2        | melanoma antigen, family E, 2                                                         | 3               | 0               | 0                | 3.034066            |
| 30   | 224904  | 2410015M20Rik | RIKEN cDNA 2410015M20 gene                                                            | 3               | 0               | 0                | 2.974453            |
| 31   | 73703   | Dppa2         | developmental pluripotency associated 2                                               | 2               | 0               | 0                | 2.970461            |
| 32   | 22592   | Ercc5         | excision repair cross-complementing rodent repair deficiency, complementation group 5 | 2               | 0               | 0                | 2.912217            |
| 33   | 16840   | Lect1         | leukocyte cell derived chemotaxin 1                                                   | 2               | 0               | 0                | 2.877199            |
| 34   | 80987   | Nckipso       | NCK interacting protein with SH3 domain                                               | 2               | 0               | 0                | 2.873466            |

## Candidates for negative regulators of normal growth (DESeq)

| Rank | entrez# | Gene Symbol   | Gene name                                                                                         | enriched shRNAs | depleted shRNAs | no change shRNAs | average Fold Change |
|------|---------|---------------|---------------------------------------------------------------------------------------------------|-----------------|-----------------|------------------|---------------------|
| 35   | 74626   | Tmem81        | transmembrane protein 81                                                                          | 2               | 0               | 0                | 2.860366            |
| 36   | 214459  | Fnbp1l        | formin binding protein 1-like                                                                     | 3               | 0               | 0                | 2.854759            |
| 37   | 76858   | Nalp14        | NLR family, pyrin domain containing 14                                                            | 2               | 0               | 0                | 2.833151            |
| 38   | 218194  | Phactr1       | phosphatase and actin regulator 1                                                                 | 2               | 0               | 0                | 2.78359             |
| 39   | 20024   | Sub1          | SUB1 homolog (S. cerevisiae)                                                                      | 2               | 0               | 0                | 2.77859             |
| 40   | 224833  | AI661453      | expressed sequence AI661453                                                                       | 2               | 0               | 0                | 2.731329            |
| 41   | 74666   | 4930432K21Rik | RIKEN cDNA 4930432K21 gene                                                                        | 2               | 0               | 0                | 2.728271            |
| 42   | 224454  | Zdhhc14       | zinc finger, DHHC domain containing 14                                                            | 2               | 0               | 0                | 2.723168            |
| 43   | 238011  | Enpp7         | ectonucleotide pyrophosphatase/phosphodiesterase 7                                                | 2               | 0               | 0                | 2.722461            |
| 44   | 212974  | Ath1l         | ATH1, acid trehalase-like 1 (yeast)                                                               | 2               | 0               | 0                | 2.71732             |
| 45   | 66865   | Pmpca         | peptidase (mitochondrial processing) alpha                                                        | 2               | 0               | 0                | 2.664393            |
| 46   | 17532   | Mras          | muscle and microspikes RAS                                                                        | 2               | 0               | 0                | 2.660672            |
| 47   | 26559   | Hunk          | hormonally upregulated Neu-associated kinase                                                      | 2               | 0               | 0                | 2.654869            |
| 48   | 226646  | Ndufs2        | NADH dehydrogenase (ubiquinone) Fe-S protein 2                                                    | 2               | 0               | 0                | 2.647985            |
| 49   | 107932  | Chd4          | chromodomain helicase DNA binding protein 4                                                       | 2               | 0               | 0                | 2.642334            |
| 50   | 272636  | D9Ert280e     | extended synaptotagmin-like protein 3                                                             | 2               | 0               | 0                | 2.639927            |
| 51   | 59025   | Usp14         | ubiquitin specific peptidase 14                                                                   | 2               | 0               | 0                | 2.637108            |
| 52   | 66598   | 3110001I22Rik | RIKEN cDNA 3110001I22 gene                                                                        | 2               | 0               | 0                | 2.633741            |
| 53   | 71907   | Serpina9      | serine (or cysteine) peptidase inhibitor, clade A (alpha-1 antiproteinase, antitrypsin), member 9 | 2               | 0               | 0                | 2.633154            |
| 54   | 77794   | Adamtsl2      | ADAMTS-like 2                                                                                     | 2               | 0               | 0                | 2.631688            |
| 55   | 20476   | Six6          | sine oculis-related homeobox 6 homolog (Drosophila)                                               | 2               | 0               | 0                | 2.630963            |
| 56   | 219151  | Scara3        | scavenger receptor class A, member 3                                                              | 2               | 0               | 0                | 2.623779            |
| 57   | 18574   | Pde1b         | phosphodiesterase 1B, Ca2+-calmodulin dependent                                                   | 2               | 0               | 0                | 2.617032            |
| 58   | 67811   | Poldip2       | polymerase (DNA-directed), delta interacting protein 2                                            | 2               | 0               | 0                | 2.614136            |
| 59   | 30060   | Mfi2          | antigen p97 (melanoma associated) identified by monoclonal antibodies 133.2 and 96.5              | 2               | 0               | 0                | 2.586174            |
| 60   | 107895  | Mgat5         | mannoside acetylglucosaminyltransferase 5                                                         | 2               | 0               | 0                | 2.578212            |
| 61   | 21897   | Tlr1          | toll-like receptor 1                                                                              | 2               | 0               | 0                | 2.576724            |
| 62   | 228788  | BC020535      | cDNA sequence BC020535                                                                            | 2               | 0               | 0                | 2.574493            |
| 63   | 16648   | Kpna3         | karyopherin (importin) alpha 3                                                                    | 2               | 0               | 0                | 2.57353             |
| 64   | 213696  | Duoxa1        | dual oxidase maturation factor 1                                                                  | 2               | 0               | 0                | 2.552045            |
| 65   | 240817  | 5830403L16Rik | RIKEN cDNA 5830403L16 gene                                                                        | 2               | 0               | 0                | 2.552016            |
| 66   | 110157  | Raf1          | v-raf-leukemia viral oncogene 1                                                                   | 4               | 0               | 0                | 2.543896            |
| 67   | 20185   | Ncor1         | nuclear receptor co-repressor 1                                                                   | 2               | 0               | 0                | 2.540164            |
| 68   | 18722   | Pira1         | paired-Ig-like receptor A1                                                                        | 2               | 0               | 0                | 2.529442            |

Candidates for negative regulators of normal growth (DESeq)

| Rank | entrez# | Gene Symbol   | Gene name                                                                           | enriched shRNAs | depleted shRNAs | no change shRNAs | average Fold Change |
|------|---------|---------------|-------------------------------------------------------------------------------------|-----------------|-----------------|------------------|---------------------|
| 69   | 69727   | Usp46         | ubiquitin specific peptidase 46                                                     | 2               | 0               | 0                | 2.527837            |
| 70   | 11514   | Adcy8         | adenylate cyclase 8                                                                 | 2               | 0               | 0                | 2.52696             |
| 71   | 434437  | Amt           | aminomethyltransferase                                                              | 2               | 0               | 0                | 2.518302            |
| 72   | 14417   | Gad2          | glutamic acid decarboxylase 2                                                       | 2               | 0               | 0                | 2.505384            |
| 73   | 19059   | Ppp3r2        | protein phosphatase 3, regulatory subunit B, alpha isoform (calcineurin B, type II) | 2               | 0               | 0                | 2.505049            |
| 74   | 74413   | Mtac2d1       | tandem C2 domains, nuclear                                                          | 3               | 0               | 0                | 2.503905            |
| 75   | 68166   | Spire1        | spire homolog 1 (Drosophila)                                                        | 2               | 0               | 0                | 2.50085             |
| 76   | 66074   | O610041E09Rik | transmembrane protein 167                                                           | 2               | 0               | 0                | 2.492077            |
| 77   | 14065   | F2r13         | coagulation factor II (thrombin) receptor-like 3                                    | 2               | 0               | 0                | 2.491837            |
| 78   | 20300   | Ccl25         | chemokine (C-C motif) ligand 25                                                     | 2               | 0               | 0                | 2.483595            |
| 79   | 26894   | Cops7a        | COP9 (constitutive photomorphogenic) homolog, subunit 7a (Arabidopsis thaliana)     | 2               | 0               | 0                | 2.472832            |
| 80   | 212547  | BC027231      | cDNA sequence BC027231                                                              | 2               | 0               | 0                | 2.471346            |
| 81   | 238328  | Vash1         | vasohibin 1                                                                         | 2               | 0               | 0                | 2.470853            |
| 82   | 232821  | Ccdc106       | coiled-coil domain containing 106                                                   | 2               | 0               | 0                | 2.45819             |
| 83   | 12064   | Bdnf          | brain derived neurotrophic factor                                                   | 3               | 0               | 0                | 2.448153            |
| 84   | 106298  | Rrn3          | RRN3 RNA polymerase I transcription factor homolog (yeast)                          | 2               | 0               | 0                | 2.43853             |
| 85   | 20324   | Sdpr          | serum deprivation response                                                          | 2               | 0               | 0                | 2.434226            |
| 86   | 19364   | Rad5113       | RAD51-like 3 (S. cerevisiae)                                                        | 2               | 0               | 0                | 2.42997             |
| 87   | 67857   | Ppp6c         | protein phosphatase 6, catalytic subunit                                            | 2               | 0               | 0                | 2.42692             |
| 88   | 13010   | Cst3          | cystatin C                                                                          | 2               | 0               | 0                | 2.425968            |
| 89   | 74192   | Arpc5l        | actin related protein 2/3 complex, subunit 5-like                                   | 2               | 0               | 0                | 2.413497            |
| 90   | 67838   | Dnajb11       | DnaJ (Hsp40) homolog, subfamily B, member 11                                        | 2               | 0               | 0                | 2.413315            |
| 91   | 70257   | 2010107E04Rik | RIKEN cDNA 2010107E04 gene                                                          | 2               | 0               | 0                | 2.406474            |
| 92   | 213027  | B130050I23Rik | ecotropic viral integration site 5 like                                             | 2               | 0               | 0                | 2.405743            |
| 93   | 73730   | 1110008K04Rik | late cornified envelope 1L                                                          | 2               | 0               | 0                | 2.400282            |
| 94   | 231327  | Ppat          | phosphoribosyl pyrophosphate amidotransferase                                       | 2               | 0               | 0                | 2.400077            |
| 95   | 23955   | Nek4          | NIMA (never in mitosis gene a)-related expressed kinase 4                           | 2               | 0               | 0                | 2.400034            |
| 96   | 23874   | Fars1b        | phenylalanyl-tRNA synthetase, beta subunit                                          | 2               | 0               | 0                | 2.397824            |
| 97   | 53814   | Oaz3          | ornithine decarboxylase antizyme 3                                                  | 2               | 0               | 0                | 2.392405            |
| 98   | 54637   | Praf2         | PRA1 domain family 2                                                                | 2               | 0               | 0                | 2.387377            |
| 99   | 224065  | Uts2d         | urotensin 2 domain containing                                                       | 2               | 0               | 0                | 2.385893            |
| 100  | 225207  | Zfp521        | zinc finger protein 521                                                             | 2               | 0               | 0                | 2.383188            |
| 101  | 68477   | Rmnd5a        | required for meiotic nuclear division 5 homolog A (S. cerevisiae)                   | 2               | 0               | 0                | 2.379593            |
| 102  | 72267   | Lrrc8e        | leucine rich repeat containing 8 family, member E                                   | 2               | 0               | 0                | 2.369083            |

## Candidates for negative regulators of normal growth (DESeq)

| Rank | entrez# | Gene Symbol   | Gene name                                                                      | enriched shRNAs | depleted shRNAs | no change shRNAs | average Fold Change |
|------|---------|---------------|--------------------------------------------------------------------------------|-----------------|-----------------|------------------|---------------------|
| 103  | 276905  | Armc7         | armadillo repeat containing 7                                                  | 2               | 0               | 0                | 2.365173            |
| 104  | 241128  | A830043J08Rik | family with sequence similarity 124, member B                                  | 2               | 0               | 0                | 2.357856            |
| 105  | 54373   | Prss16        | protease, serine, 16 (thymus)                                                  | 2               | 0               | 0                | 2.357606            |
| 106  | 16068   | Il18bp        | interleukin 18 binding protein                                                 | 2               | 0               | 0                | 2.357197            |
| 107  | 76184   | Abca6         | ATP-binding cassette, sub-family A (ABC1), member 6                            | 2               | 0               | 0                | 2.356596            |
| 108  | 11441   | Chrna7        | cholinergic receptor, nicotinic, alpha polypeptide 7                           | 2               | 0               | 0                | 2.355706            |
| 109  | 18782   | Pla2g2d       | phospholipase A2, group IID                                                    | 3               | 0               | 0                | 2.354678            |
| 110  | 74071   | 4933403M22Rik | intermediate filament tail domain containing 1                                 | 2               | 0               | 0                | 2.353355            |
| 111  | 69192   | Dhx16         | DEAH (Asp-Glu-Ala-His) box polypeptide 16                                      | 2               | 0               | 0                | 2.352915            |
| 112  | 17251   | Mds1          | NA                                                                             | 2               | 0               | 0                | 2.352851            |
| 113  | 233810  | Abca16        | ATP-binding cassette, sub-family A (ABC1), member 16                           | 2               | 0               | 0                | 2.349315            |
| 114  | 14121   | Fbp1          | fructose bisphosphatase 1                                                      | 2               | 0               | 0                | 2.347284            |
| 115  | 80706   | Olf160        | olfactory receptor 160                                                         | 2               | 0               | 0                | 2.345659            |
| 116  | 74147   | Ehhadh        | enoyl-Coenzyme A, hydratase/3-hydroxyacyl Coenzyme A dehydrogenase             | 2               | 0               | 0                | 2.345472            |
| 117  | 12236   | Bub1b         | budding uninhibited by benzimidazoles 1 homolog, beta ( <i>S. cerevisiae</i> ) | 2               | 0               | 0                | 2.335329            |
| 118  | 74054   | 4931406B18Rik | RIKEN cDNA 4931406B18 gene                                                     | 2               | 0               | 0                | 2.332611            |
| 119  | 14007   | Cugbp2        | CUGBP, Elav-like family member 2                                               | 2               | 0               | 0                | 2.330545            |
| 120  | 23887   | Ggta1         | gamma-glutamyltransferase 5                                                    | 2               | 0               | 0                | 2.328254            |
| 121  | 59001   | Pole3         | polymerase (DNA directed), epsilon 3 (p17 subunit)                             | 2               | 0               | 0                | 2.326922            |
| 122  | 57869   | Adck2         | aarF domain containing kinase 2                                                | 3               | 0               | 0                | 2.321992            |
| 123  | 73873   | 4930430E16Rik | family with sequence similarity 161, member A                                  | 2               | 0               | 0                | 2.320126            |
| 124  | 18518   | Igbbp1        | immunoglobulin (CD79A) binding protein 1                                       | 2               | 0               | 0                | 2.317395            |
| 125  | 70984   | 4931406C07Rik | RIKEN cDNA 4931406C07 gene                                                     | 2               | 0               | 0                | 2.317035            |
| 126  | 17309   | Mgat3         | mannoside acetylglucosaminyltransferase 3                                      | 2               | 0               | 0                | 2.316903            |
| 127  | 238555  | Btn2a2        | butyrophilin, subfamily 2, member A2                                           | 2               | 0               | 0                | 2.316657            |
| 128  | 12405   | Cbln2         | cerebellin 2 precursor protein                                                 | 2               | 0               | 0                | 2.312928            |
| 129  | 16600   | Klf4          | Kruppel-like factor 4 (gut)                                                    | 2               | 0               | 0                | 2.301804            |
| 130  | 21379   | Tbrg4         | transforming growth factor beta regulated gene 4                               | 2               | 0               | 0                | 2.30045             |
| 131  | 26401   | Map3k1        | mitogen-activated protein kinase kinase kinase 1                               | 2               | 0               | 0                | 2.300124            |
| 132  | 73341   | Arhgef6       | Rac/Cdc42 guanine nucleotide exchange factor (GEF) 6                           | 2               | 0               | 0                | 2.29672             |
| 133  | 258463  | Olf1393       | olfactory receptor 1393                                                        | 2               | 0               | 0                | 2.295191            |
| 134  | 56399   | Akap8         | A kinase (PRKA) anchor protein 8                                               | 2               | 0               | 0                | 2.292302            |
| 135  | 54399   | Bet1l         | blocked early in transport 1 homolog ( <i>S. cerevisiae</i> )-like             | 2               | 0               | 0                | 2.291691            |
| 136  | 18703   | Pigr          | polymeric immunoglobulin receptor                                              | 2               | 0               | 0                | 2.288426            |

## Candidates for negative regulators of normal growth (DESeq)

| Rank | entrez# | Gene Symbol   | Gene name                                                                                            | enriched shRNAs | depleted shRNAs | no change shRNAs | average Fold Change |
|------|---------|---------------|------------------------------------------------------------------------------------------------------|-----------------|-----------------|------------------|---------------------|
| 137  | 27053   | Asns          | asparagine synthetase                                                                                | 2               | 0               | 0                | 2.288411            |
| 138  | 108950  | 1700049L16Rik | hematological and neurological expressed 1-like pseudogene                                           | 2               | 0               | 0                | 2.286619            |
| 139  | 19144   | Klk6          | kallikrein related-peptidase 6                                                                       | 2               | 0               | 0                | 2.278726            |
| 140  | 108946  | Zzz3          | zinc finger, ZZ domain containing 3                                                                  | 2               | 0               | 0                | 2.275646            |
| 141  | 15467   | Eif2ak1       | eukaryotic translation initiation factor 2 alpha kinase 1                                            | 3               | 0               | 0                | 2.275387            |
| 142  | 67279   | Med31         | mediator of RNA polymerase II transcription, subunit 31 homolog (yeast)                              | 2               | 0               | 0                | 2.274717            |
| 143  | 56338   | Txnip         | thioredoxin interacting protein                                                                      | 2               | 0               | 0                | 2.272533            |
| 144  | 387341  | Tas2r106      | taste receptor, type 2, member 106                                                                   | 3               | 0               | 0                | 2.269963            |
| 145  | 83559   | Tex18         | testis expressed gene 18                                                                             | 3               | 0               | 0                | 2.26889             |
| 146  | 68304   | Kdelc2        | KDEL (Lys-Asp-Glu-Leu) containing 2                                                                  | 2               | 0               | 0                | 2.266721            |
| 147  | 21819   | Tgn           | thyroglobulin                                                                                        | 2               | 0               | 0                | 2.262876            |
| 148  | 231148  | Ablim2        | actin-binding LIM protein 2                                                                          | 2               | 0               | 0                | 2.261238            |
| 149  | 217353  | Tmc6          | transmembrane channel-like gene family 6                                                             | 2               | 0               | 0                | 2.25885             |
| 150  | 83379   | Klb           | klotho beta                                                                                          | 2               | 0               | 0                | 2.257068            |
| 151  | 258482  | Olf2r266      | olfactory receptor 266                                                                               | 2               | 0               | 0                | 2.25703             |
| 152  | 230848  | Zbtb40        | zinc finger and BTB domain containing 40                                                             | 2               | 0               | 0                | 2.251984            |
| 153  | 14359   | Fxr1h         | fragile X mental retardation gene 1, autosomal homolog                                               | 3               | 0               | 0                | 2.248053            |
| 154  | 230145  | Galnt12       | UDP-N-acetyl-alpha-D-galactosamine:polypeptide N-acetylgalactosaminyltransferase 12                  | 2               | 0               | 0                | 2.248025            |
| 155  | 394435  | Ugt1a6b       | UDP glucuronosyltransferase 1 family, polypeptide A6B                                                | 2               | 0               | 0                | 2.245422            |
| 156  | 239217  | Kctd12        | potassium channel tetramerisation domain containing 12                                               | 2               | 0               | 0                | 2.245041            |
| 157  | 72507   | Dzip1l        | DAZ interacting protein 1-like                                                                       | 3               | 0               | 0                | 2.239008            |
| 158  | 70315   | Hdac8         | histone deacetylase 8                                                                                | 2               | 0               | 0                | 2.238949            |
| 159  | 338368  | C920005C14Rik | family with sequence similarity 109, member B                                                        | 2               | 0               | 0                | 2.237702            |
| 160  | 14089   | Fap           | fibroblast activation protein                                                                        | 3               | 0               | 0                | 2.230605            |
| 161  | 67921   | Ube2f         | ubiquitin-conjugating enzyme E2F (putative)                                                          | 2               | 0               | 0                | 2.229074            |
| 162  | 78832   | 2700078E11Rik | RIKEN cDNA 2700078E11 gene                                                                           | 2               | 0               | 0                | 2.228656            |
| 163  | 17686   | Msh3          | mutS homolog 3 (E. coli)                                                                             | 2               | 0               | 0                | 2.223335            |
| 164  | 13990   | Smarcaad1     | SWI/SNF-related, matrix-associated actin-dependent regulator of chromatin, subfamily a, containing D | 2               | 0               | 0                | 2.220086            |
| 165  | 12823   | Col19a1       | collagen, type XIX, alpha 1                                                                          | 2               | 0               | 0                | 2.216205            |
| 166  | 381903  | Alg8          | asparagine-linked glycosylation 8 homolog (yeast, alpha-1,3-glucosyltransferase)                     | 2               | 0               | 0                | 2.215534            |
| 167  | 67736   | 4930527D15Rik | coiled-coil domain containing 130                                                                    | 2               | 0               | 0                | 2.214901            |
| 168  | 210719  | Mkx           | mohawk homeobox                                                                                      | 2               | 0               | 0                | 2.213374            |
| 169  | 18111   | Nnat          | neuronatin                                                                                           | 2               | 0               | 0                | 2.210565            |
| 170  | 74571   | Kcnk16        | potassium channel, subfamily K, member 16                                                            | 3               | 0               | 0                | 2.209352            |



## Candidates for negative regulators of normal growth (DESeq)

| Rank | entrez# | Gene Symbol   | Gene name                                                                              | enriched shRNAs | depleted shRNAs | no change shRNAs | average Fold Change |
|------|---------|---------------|----------------------------------------------------------------------------------------|-----------------|-----------------|------------------|---------------------|
| 171  | 70110   | Ifi35         | interferon-induced protein 35                                                          | 2               | 0               | 0                | 2.208961            |
| 172  | 27206   | Nrk           | Nik related kinase                                                                     | 2               | 0               | 0                | 2.199358            |
| 173  | 234076  | Tmco3         | transmembrane and coiled-coil domains 3                                                | 2               | 0               | 0                | 2.198301            |
| 174  | 15370   | Nr4a1         | nuclear receptor subfamily 4, group A, member 1                                        | 2               | 0               | 0                | 2.19815             |
| 175  | 234967  | Slc36a4       | solute carrier family 36 (proton/amino acid symporter), member 4                       | 3               | 0               | 0                | 2.197768            |
| 176  | 108151  | Sema3d        | sema domain, immunoglobulin domain (Ig), short basic domain, secreted, (semaphorin) 3D | 3               | 0               | 0                | 2.196941            |
| 177  | 14456   | Gas6          | growth arrest specific 6                                                               | 3               | 0               | 0                | 2.19417             |
| 178  | 259057  | Olfir649      | olfactory receptor 649                                                                 | 3               | 0               | 0                | 2.194165            |
| 179  | 110265  | Msra          | methionine sulfoxide reductase A                                                       | 2               | 0               | 0                | 2.194159            |
| 180  | 224014  | Fgd4          | FYVE, RhoGEF and PH domain containing 4                                                | 2               | 0               | 0                | 2.18677             |
| 181  | 246728  | Oas2          | 2'-5' oligoadenylate synthetase 2                                                      | 3               | 0               | 0                | 2.184186            |
| 182  | 70208   | Crsp3         | mediator complex subunit 23                                                            | 2               | 0               | 0                | 2.18108             |
| 183  | 408068  | 3830402I07Rik | zinc finger protein 738                                                                | 2               | 0               | 0                | 2.178504            |
| 184  | 230661  | Tesk2         | testis-specific kinase 2                                                               | 2               | 0               | 0                | 2.177426            |
| 185  | 258845  | Olfir1161     | olfactory receptor 1161                                                                | 2               | 0               | 0                | 2.177115            |
| 186  | 233578  | Olfir553      | olfactory receptor 553                                                                 | 2               | 0               | 0                | 2.175703            |
| 187  | 74203   | Eif4enif1     | eukaryotic translation initiation factor 4E nuclear import factor 1                    | 2               | 0               | 0                | 2.173799            |
| 188  | 11630   | Aim1          | absent in melanoma 1                                                                   | 2               | 0               | 0                | 2.170166            |
| 189  | 17977   | Ncoa1         | nuclear receptor coactivator 1                                                         | 2               | 0               | 0                | 2.1686              |
| 190  | 258843  | Olfir1087     | olfactory receptor 1087                                                                | 2               | 0               | 0                | 2.168345            |
| 191  | 20405   | Sh3gl1        | SH3-domain GRB2-like 1                                                                 | 2               | 0               | 0                | 2.167875            |
| 192  | 107751  | Prrxl1        | paired related homeobox protein-like 1                                                 | 2               | 0               | 0                | 2.166369            |
| 193  | 58251   | Ddc8          | cDNA sequence BC100451                                                                 | 3               | 0               | 0                | 2.165269            |
| 194  | 72242   | Psg21         | pregnancy-specific glycoprotein 21                                                     | 2               | 0               | 0                | 2.161856            |
| 195  | 72050   | Kdelc1        | KDEL (Lys-Asp-Glu-Leu) containing 1                                                    | 2               | 0               | 0                | 2.155147            |
| 196  | 330463  | Zfp78         | zinc finger protein 78                                                                 | 2               | 0               | 0                | 2.152578            |
| 197  | 18314   | Olfir17       | olfactory receptor 17                                                                  | 2               | 0               | 0                | 2.146221            |
| 198  | 22225   | Usp5          | ubiquitin specific peptidase 5 (isopeptidase T)                                        | 2               | 0               | 0                | 2.143757            |
| 199  | 223499  | Wdsof1        | DDB1 and CUL4 associated factor 13                                                     | 2               | 0               | 0                | 2.14295             |
| 200  | 19733   | Rgn           | regucalcin                                                                             | 2               | 0               | 0                | 2.139777            |
| 201  | 235559  | Topbp1        | topoisomerase (DNA) II binding protein 1                                               | 2               | 0               | 0                | 2.135101            |
| 202  | 104086  | Cyp27a1       | cytochrome P450, family 27, subfamily a, polypeptide 1                                 | 2               | 0               | 0                | 2.133933            |
| 203  | 234407  | Glt25d1       | glycosyltransferase 25 domain containing 1                                             | 2               | 0               | 0                | 2.132207            |
| 204  | 54169   | Myst4         | MYST histone acetyltransferase monocytic leukemia 4                                    | 2               | 0               | 0                | 2.129097            |

Candidates for negative regulators of normal growth (DESeq)

| Rank | entrez# | Gene Symbol   | Gene name                                                       | enriched shRNAs | depleted shRNAs | no change shRNAs | average Fold Change |
|------|---------|---------------|-----------------------------------------------------------------|-----------------|-----------------|------------------|---------------------|
| 205  | 66179   | 1110031I02Rik | RIKEN cDNA 1110031I02 gene                                      | 2               | 0               | 0                | 2.128312            |
| 206  | 27045   | Nit1          | nitrilase 1                                                     | 2               | 0               | 0                | 2.126948            |
| 207  | 63857   | Bcmo1         | beta-carotene 15,15'-monooxygenase                              | 2               | 0               | 0                | 2.123781            |
| 208  | 27380   | Tcl1b4        | T cell leukemia/lymphoma 1B, 4                                  | 2               | 0               | 0                | 2.120376            |
| 209  | 105522  | Ankrd28       | ankyrin repeat domain 28                                        | 2               | 0               | 0                | 2.116286            |
| 210  | 259037  | Olf1r711      | olfactory receptor 711                                          | 2               | 0               | 0                | 2.114617            |
| 211  | 17289   | Mertk         | c-mer proto-oncogene tyrosine kinase                            | 2               | 0               | 0                | 2.110693            |
| 212  | 12725   | Clcn3         | chloride channel 3                                              | 3               | 0               | 0                | 2.107907            |
| 213  | 52710   | Gpr172b       | G protein-coupled receptor 172B                                 | 2               | 0               | 0                | 2.107816            |
| 214  | 71934   | Car13         | carbonic anhydrase 13                                           | 2               | 0               | 0                | 2.107683            |
| 215  | 23837   | Cfdp1         | craniofacial development protein 1                              | 3               | 0               | 0                | 2.106618            |
| 216  | 20980   | Syt2          | synaptotagmin II                                                | 2               | 0               | 0                | 2.102682            |
| 217  | 59287   | Ncstn         | nicastrin                                                       | 3               | 0               | 0                | 2.099643            |
| 218  | 20650   | Sntb2         | syntrophin, basic 2                                             | 2               | 0               | 0                | 2.09811             |
| 219  | 73324   | 1700034F02Rik | RIKEN cDNA 1700034F02 gene                                      | 2               | 0               | 0                | 2.097888            |
| 220  | 104885  | AI839735      | transmembrane protein 179                                       | 2               | 0               | 0                | 2.096702            |
| 221  | 20845   | Star          | steroidogenic acute regulatory protein                          | 2               | 0               | 0                | 2.095192            |
| 222  | 258487  | Olf1r722      | olfactory receptor 722                                          | 2               | 0               | 0                | 2.094908            |
| 223  | 215413  | A230074B11Rik | NA                                                              | 2               | 0               | 0                | 2.094423            |
| 224  | 11784   | Apba2         | amyloid beta (A4) precursor protein-binding, family A, member 2 | 2               | 0               | 0                | 2.09171             |
| 225  | 20269   | Scn3a         | sodium channel, voltage-gated, type III, alpha                  | 3               | 0               | 0                | 2.089114            |
| 226  | 75275   | 4930563P21Rik | transmembrane and coiled-coil domains 5B                        | 3               | 0               | 0                | 2.086815            |
| 227  | 74016   | Phf19         | PHD finger protein 19                                           | 2               | 0               | 0                | 2.077359            |
| 228  | 237339  | L3mbtl3       | l(3)mbt-like 3 (Drosophila)                                     | 3               | 0               | 0                | 2.077281            |
| 229  | 276919  | Gemin4        | gem (nuclear organelle) associated protein 4                    | 2               | 0               | 0                | 2.076963            |
| 230  | 230603  | 4922503N01Rik | tetratricopeptide repeat domain 39A                             | 2               | 0               | 0                | 2.075884            |
| 231  | 67008   | 1600012F09Rik | RIKEN cDNA 1600012F09 gene                                      | 2               | 0               | 0                | 2.073094            |
| 232  | 14823   | Grm8          | glutamate receptor, metabotropic 8                              | 2               | 0               | 0                | 2.071483            |
| 233  | 68015   | Trap1         | TNF receptor-associated protein 1                               | 2               | 0               | 0                | 2.068175            |
| 234  | 213988  | Tnrc6b        | trinucleotide repeat containing 6b                              | 2               | 0               | 0                | 2.06278             |
| 235  | 22325   | Vav2          | vav 2 oncogene                                                  | 2               | 0               | 0                | 2.061175            |
| 236  | 14348   | Fut9          | fucosyltransferase 9                                            | 2               | 0               | 0                | 2.060971            |
| 237  | 433667  | Ankrd13c      | ankyrin repeat domain 13c                                       | 2               | 0               | 0                | 2.060821            |
| 238  | 236891  | LOC236891     | melanoma antigen family B, 17, pseudogene                       | 2               | 0               | 0                | 2.059225            |

## Candidates for negative regulators of normal growth (DESeq)

| Rank | entrez# | Gene Symbol   | Gene name                                                       | enriched shRNAs | depleted shRNAs | no change shRNAs | average Fold Change |
|------|---------|---------------|-----------------------------------------------------------------|-----------------|-----------------|------------------|---------------------|
| 239  | 12663   | Chml          | choroideremia-like                                              | 2               | 0               | 0                | 2.057415            |
| 240  | 20192   | Ryr3          | ryanodine receptor 3                                            | 2               | 0               | 0                | 2.055629            |
| 241  | 54215   | Cd160         | CD160 antigen                                                   | 2               | 0               | 0                | 2.054819            |
| 242  | 75812   | Tasp1         | taspase, threonine aspartase 1                                  | 2               | 0               | 0                | 2.054742            |
| 243  | 18102   | Nme1          | non-metastatic cells 1, protein (NM23A) expressed in            | 2               | 0               | 0                | 2.054721            |
| 244  | 21984   | Tpbpa         | trophoblast specific protein alpha                              | 3               | 0               | 0                | 2.054181            |
| 245  | 21925   | Tnnc2         | troponin C2, fast                                               | 2               | 0               | 0                | 2.053546            |
| 246  | 18196   | Nsg1          | neuron specific gene family member 1                            | 2               | 0               | 0                | 2.052153            |
| 247  | 230904  | Fbxo2         | F-box protein 2                                                 | 2               | 0               | 0                | 2.051959            |
| 248  | 12028   | Bax           | BCL2-associated X protein                                       | 2               | 0               | 0                | 2.050745            |
| 249  | 384309  | Trim56        | tripartite motif-containing 56                                  | 2               | 0               | 0                | 2.047845            |
| 250  | 23972   | Papss2        | 3'-phosphoadenosine 5'-phosphosulfate synthase 2                | 2               | 0               | 0                | 2.043264            |
| 251  | 20905   | Sts           | steroid sulfatase                                               | 2               | 0               | 0                | 2.035747            |
| 252  | 259026  | Olfir378      | olfactory receptor 378                                          | 2               | 0               | 0                | 2.032803            |
| 253  | 231214  | 5730509K17Rik | coiled-coil and C2 domain containing 2A                         | 2               | 0               | 0                | 2.03246             |
| 254  | 53870   | Cntn6         | contactin 6                                                     | 2               | 0               | 0                | 2.032073            |
| 255  | 12338   | Capn6         | calpain 6                                                       | 3               | 0               | 0                | 2.032042            |
| 256  | 56249   | Actr8         | ARP8 actin-related protein 8 homolog ( <i>S. cerevisiae</i> )   | 2               | 0               | 0                | 2.026969            |
| 257  | 434648  | UNK           | NA                                                              | 2               | 0               | 0                | 2.026518            |
| 258  | 14175   | Fgf4          | fibroblast growth factor 4                                      | 2               | 0               | 0                | 2.023041            |
| 259  | 56050   | Cyp39a1       | cytochrome P450, family 39, subfamily a, polypeptide 1          | 2               | 0               | 0                | 2.022599            |
| 260  | 106869  | Tnfaip8       | tumor necrosis factor, alpha-induced protein 8                  | 2               | 0               | 0                | 2.022015            |
| 261  | 100608  | Noc4l         | nucleolar complex associated 4 homolog ( <i>S. cerevisiae</i> ) | 2               | 0               | 0                | 2.020604            |
| 262  | 218962  | UNK           | NA                                                              | 2               | 0               | 0                | 2.019946            |
| 263  | 12279   | C9            | complement component 9                                          | 3               | 0               | 0                | 2.018071            |
| 264  | 218811  | Sec24c        | Sec24 related gene family, member C ( <i>S. cerevisiae</i> )    | 2               | 0               | 0                | 2.017893            |
| 265  | 414801  | BC063749      | inositol 1,4,5-triphosphate receptor interacting protein        | 2               | 0               | 0                | 2.017578            |
| 266  | 72388   | Ripk4         | receptor-interacting serine-threonine kinase 4                  | 2               | 0               | 0                | 2.017192            |
| 267  | 170731  | Mfn2          | mitofusin 2                                                     | 2               | 0               | 0                | 2.013913            |
| 268  | 12483   | Cd22          | CD22 antigen                                                    | 2               | 0               | 0                | 2.010959            |
| 269  | 320655  | Perld1        | post-GPI attachment to proteins 3                               | 2               | 0               | 0                | 2.00701             |
| 270  | 20853   | Stau1         | staufen (RNA binding protein) homolog 1 ( <i>Drosophila</i> )   | 2               | 0               | 0                | 2.001186            |
| 271  | 16204   | Fabp6         | fatty acid binding protein 6, ileal (gastrotropin)              | 2               | 0               | 0                | 1.998351            |
| 272  | 269224  | Pask          | PAS domain containing serine/threonine kinase                   | 2               | 0               | 0                | 1.995465            |

## Candidates for negative regulators of normal growth (DESeq)

| Rank | entrez# | Gene Symbol   | Gene name                                                   | enriched shRNAs | depleted shRNAs | no change shRNAs | average Fold Change |
|------|---------|---------------|-------------------------------------------------------------|-----------------|-----------------|------------------|---------------------|
| 273  | 258603  | Olf972        | olfactory receptor 972                                      | 2               | 0               | 0                | 1.99509             |
| 274  | 12380   | Cast          | calpastatin                                                 | 2               | 0               | 0                | 1.994822            |
| 275  | 66422   | 2410015N17Rik | dCTP pyrophosphatase 1                                      | 2               | 0               | 0                | 1.993409            |
| 276  | 78593   | Nrip3         | nuclear receptor interacting protein 3                      | 2               | 0               | 0                | 1.990946            |
| 277  | 216850  | Jmjd3         | KDM1 lysine (K)-specific demethylase 6B                     | 3               | 0               | 0                | 1.989205            |
| 278  | 99526   | Usp53         | ubiquitin specific peptidase 53                             | 2               | 0               | 0                | 1.98632             |
| 279  | 72584   | Cul4b         | cullin 4B                                                   | 2               | 0               | 0                | 1.985538            |
| 280  | 20181   | Rxra          | retinoid X receptor alpha                                   | 3               | 0               | 0                | 1.985464            |
| 281  | 353148  | Tas2r139      | taste receptor, type 2, member 139                          | 2               | 0               | 0                | 1.980944            |
| 282  | 66540   | 3110001A13Rik | family with sequence similarity 107, member B               | 2               | 0               | 0                | 1.980676            |
| 283  | 19045   | Ppp1ca        | protein phosphatase 1, catalytic subunit, alpha isoform     | 2               | 0               | 0                | 1.979237            |
| 284  | 104725  | 1110002B05Rik | RIKEN cDNA 1110002B05 gene                                  | 2               | 0               | 0                | 1.976265            |
| 285  | 13639   | Efna4         | ephrin A4                                                   | 2               | 0               | 0                | 1.974096            |
| 286  | 259098  | Olf9606       | olfactory receptor 606                                      | 2               | 0               | 0                | 1.970863            |
| 287  | 380752  | Tssc1         | tumor suppressing subtransferable candidate 1               | 2               | 0               | 0                | 1.970774            |
| 288  | 215474  | Sec22c        | SEC22 vesicle trafficking protein homolog C (S. cerevisiae) | 3               | 0               | 0                | 1.968414            |
| 289  | 11569   | Aebp2         | AE binding protein 2                                        | 2               | 0               | 0                | 1.966357            |
| 290  | 319757  | Smo           | smoothened homolog (Drosophila)                             | 2               | 0               | 0                | 1.963685            |
| 291  | 229672  | Gm566         | BCL2-like 15                                                | 2               | 0               | 0                | 1.96266             |
| 292  | 71743   | Coasy         | Coenzyme A synthase                                         | 2               | 0               | 0                | 1.961888            |
| 293  | 404338  | Olf91434      | olfactory receptor 1434                                     | 2               | 0               | 0                | 1.960319            |
| 294  | 15510   | Hspd1         | heat shock protein 1 (chaperonin)                           | 2               | 0               | 0                | 1.960235            |
| 295  | 72615   | Anks3         | ankyrin repeat and sterile alpha motif domain containing 3  | 2               | 0               | 0                | 1.960085            |
| 296  | 239719  | Mkl2          | MKL/myocardin-like 2                                        | 2               | 0               | 0                | 1.958162            |
| 297  | 20194   | S100a10       | S100 calcium binding protein A10 (calpactin)                | 2               | 0               | 0                | 1.951545            |
| 298  | 404341  | Olf91514      | NA                                                          | 3               | 0               | 0                | 1.948948            |
| 299  | 227325  | Dner          | delta/notch-like EGF-related receptor                       | 3               | 0               | 0                | 1.947996            |
| 300  | 210198  | Gprc6a        | G protein-coupled receptor, family C, group 6, member A     | 2               | 0               | 0                | 1.94766             |
| 301  | 76131   | Depdc1a       | DEP domain containing 1a                                    | 2               | 0               | 0                | 1.947302            |
| 302  | 22414   | Wnt2b         | wingless related MMTV integration site 2b                   | 2               | 0               | 0                | 1.94404             |
| 303  | 399548  | Scn4b         | sodium channel, type IV, beta                               | 3               | 0               | 0                | 1.942195            |
| 304  | 16322   | Inha          | inhibin alpha                                               | 2               | 0               | 0                | 1.941226            |
| 305  | 50916   | Irx4          | Iroquois related homeobox 4 (Drosophila)                    | 3               | 0               | 0                | 1.935417            |
| 306  | 258139  | Olf9591       | olfactory receptor 591                                      | 2               | 0               | 0                | 1.935336            |

### Candidates for negative regulators of normal growth (DESeq)

| Rank | entrez# | Gene Symbol   | Gene name                                                 | enriched shRNAs | depleted shRNAs | no change shRNAs | average Fold Change |
|------|---------|---------------|-----------------------------------------------------------|-----------------|-----------------|------------------|---------------------|
| 307  | 331046  | Tgm4          | transglutaminase 4 (prostate)                             | 2               | 0               | 0                | 1.93299             |
| 308  | 72205   | Eml2          | echinoderm microtubule associated protein like 2          | 2               | 0               | 0                | 1.930648            |
| 309  | 234728  | BC025546      | FtsJ methyltransferase domain containing 1                | 2               | 0               | 0                | 1.929748            |
| 310  | 404322  | Olf924        | olfactory receptor 924                                    | 3               | 0               | 0                | 1.927076            |
| 311  | 319247  | 9530080O11Rik | RIKEN cDNA 9530080O11 gene                                | 2               | 0               | 0                | 1.926047            |
| 312  | 17095   | Lyl1          | lymphoblastic leukemia 1                                  | 2               | 0               | 0                | 1.925973            |
| 313  | 12568   | Cdk5          | cyclin-dependent kinase 5                                 | 4               | 0               | 0                | 1.92196             |
| 314  | 214763  | E330016A19Rik | RIKEN cDNA E330016A19 gene                                | 2               | 0               | 0                | 1.91965             |
| 315  | 22269   | Upk2          | uroplakin 2                                               | 2               | 0               | 0                | 1.916115            |
| 316  | 244310  | Dlgap2        | discs, large (Drosophila) homolog-associated protein 2    | 2               | 0               | 0                | 1.909478            |
| 317  | 71703   | Armxc3        | armadillo repeat containing, X-linked 3                   | 2               | 0               | 0                | 1.898844            |
| 318  | 319196  | Ankrd5        | ankyrin repeat domain 5                                   | 2               | 0               | 0                | 1.897819            |
| 319  | 328365  | Rai17         | zinc finger, MIZ-type containing 1                        | 2               | 0               | 0                | 1.896062            |
| 320  | 77574   | 3321401G04Rik | family with sequence similarity 115, member A             | 2               | 0               | 0                | 1.894275            |
| 321  | 83945   | Dnaja3        | DnaJ (Hsp40) homolog, subfamily A, member 3               | 2               | 0               | 0                | 1.892725            |
| 322  | 16007   | Cyr61         | cysteine rich protein 61                                  | 3               | 0               | 0                | 1.892253            |
| 323  | 19106   | Eif2ak2       | eukaryotic translation initiation factor 2-alpha kinase 2 | 2               | 0               | 0                | 1.89021             |
| 324  | 72542   | Pgam5         | phosphoglycerate mutase family member 5                   | 2               | 0               | 0                | 1.89016             |
| 325  | 19888   | Rp1h          | retinitis pigmentosa 1 (human)                            | 2               | 0               | 0                | 1.886849            |
| 326  | 17988   | Ndr91         | N-myc downstream regulated gene 1                         | 2               | 0               | 0                | 1.885664            |
| 327  | 68916   | Cdkal1        | CDK5 regulatory subunit associated protein 1-like 1       | 2               | 0               | 0                | 1.884032            |
| 328  | 329064  | Pkd2l1        | polycystic kidney disease 2-like 1                        | 3               | 0               | 0                | 1.881854            |
| 329  | 241494  | Zfp533        | zinc finger protein 385B                                  | 2               | 0               | 0                | 1.880775            |
| 330  | 13101   | Cyp2d10       | cytochrome P450, family 2, subfamily d, polypeptide 10    | 2               | 0               | 0                | 1.880493            |
| 331  | 17868   | Mybpc3        | myosin binding protein C, cardiac                         | 2               | 0               | 0                | 1.874855            |
| 332  | 106557  | Ldhal6b       | lactate dehydrogenase A-like 6B                           | 2               | 0               | 0                | 1.87074             |
| 333  | 12523   | Cd84          | CD84 antigen                                              | 2               | 0               | 0                | 1.869449            |
| 334  | 242891  | Gm443         | chaperonin containing TCP1, subunit 8 (theta)-like 1      | 2               | 0               | 0                | 1.869271            |
| 335  | 209268  | Igsf1         | immunoglobulin superfamily, member 1                      | 2               | 0               | 0                | 1.86787             |
| 336  | 209737  | Kif15         | kinesin family member 15                                  | 2               | 0               | 0                | 1.867814            |
| 337  | 12054   | Bcl7b         | B cell CLL/lymphoma 7B                                    | 2               | 0               | 0                | 1.867196            |
| 338  | 211401  | Mtss1         | metastasis suppressor 1                                   | 2               | 0               | 0                | 1.864779            |
| 339  | 19731   | Rgl1          | ral guanine nucleotide dissociation stimulator,-like 1    | 2               | 0               | 0                | 1.863894            |
| 340  | 24013   | Grk1          | G protein-coupled receptor kinase 1                       | 2               | 0               | 0                | 1.861455            |

## Candidates for negative regulators of normal growth (DESeq)

| Rank | entrez# | Gene Symbol   | Gene name                                                                    | enriched shRNAs | depleted shRNAs | no change shRNAs | average Fold Change |
|------|---------|---------------|------------------------------------------------------------------------------|-----------------|-----------------|------------------|---------------------|
| 341  | 20452   | St8sia4       | ST8 alpha-N-acetyl-neuraminide alpha-2,8-sialyltransferase 4                 | 2               | 0               | 0                | 1.860944            |
| 342  | 223701  | Mkl1          | MKL (megakaryoblastic leukemia)/myocardin-like 1                             | 2               | 0               | 0                | 1.858459            |
| 343  | 110893  | Slc8a3        | solute carrier family 8 (sodium/calcium exchanger), member 3                 | 2               | 0               | 0                | 1.857956            |
| 344  | 320938  | Tnpo3         | transportin 3                                                                | 2               | 0               | 0                | 1.855597            |
| 345  | 26436   | Psg16         | pregnancy specific glycoprotein 16                                           | 2               | 0               | 0                | 1.854079            |
| 346  | 12524   | Cd86          | CD86 antigen                                                                 | 2               | 0               | 0                | 1.849849            |
| 347  | 27223   | Trp53bp1      | transformation related protein 53 binding protein 1                          | 2               | 0               | 0                | 1.849193            |
| 348  | 12580   | Cdkn2c        | cyclin-dependent kinase inhibitor 2C (p18, inhibits CDK4)                    | 2               | 0               | 0                | 1.844808            |
| 349  | 19214   | Ptgdr         | prostaglandin D receptor                                                     | 2               | 0               | 0                | 1.84432             |
| 350  | 74069   | Serpina3a     | serine (or cysteine) peptidase inhibitor, clade A, member 3A                 | 4               | 0               | 0                | 1.842133            |
| 351  | 22137   | Ttk           | Ttk protein kinase                                                           | 2               | 0               | 0                | 1.841712            |
| 352  | 23793   | Adam25        | a disintegrin and metallopeptidase domain 25 (testase 2)                     | 2               | 0               | 0                | 1.84122             |
| 353  | 71724   | Aox3          | aldehyde oxidase 3                                                           | 3               | 0               | 0                | 1.838829            |
| 354  | 67418   | Ppi4          | peptidylprolyl isomerase (cyclophilin)-like 4                                | 2               | 0               | 0                | 1.83768             |
| 355  | 68291   | Mto1          | mitochondrial translation optimization 1 homolog (S. cerevisiae)             | 2               | 0               | 0                | 1.837439            |
| 356  | 22418   | Wnt5a         | wingless-related MMTV integration site 5A                                    | 2               | 0               | 0                | 1.836806            |
| 357  | 60597   | Mapk8ip2      | mitogen-activated protein kinase 8 interacting protein 2                     | 2               | 0               | 0                | 1.835851            |
| 358  | 68519   | Eml1          | echinoderm microtubule associated protein like 1                             | 2               | 0               | 0                | 1.835261            |
| 359  | 12566   | Cdk2          | cyclin-dependent kinase 2                                                    | 3               | 0               | 0                | 1.831932            |
| 360  | 117150  | Pip5k2c       | phosphatidylinositol-5-phosphate 4-kinase, type II, gamma                    | 2               | 0               | 0                | 1.830177            |
| 361  | 66349   | 2310004L02Rik | ATP5S-like                                                                   | 2               | 0               | 0                | 1.829718            |
| 362  | 56457   | Clptm1        | cleft lip and palate associated transmembrane protein 1                      | 3               | 0               | 0                | 1.828487            |
| 363  | 18331   | Olf32         | olfactory receptor 32                                                        | 2               | 0               | 0                | 1.826338            |
| 364  | 194604  | Gm46          | predicted gene 46                                                            | 3               | 0               | 0                | 1.826226            |
| 365  | 15042   | H2-T24        | histocompatibility 2, T region locus 24                                      | 3               | 0               | 0                | 1.825262            |
| 366  | 73937   | 1700029M20Rik | RIKEN cDNA 1700029M20 gene                                                   | 2               | 0               | 0                | 1.824836            |
| 367  | 53611   | Vti1a         | vesicle transport through interaction with t-SNAREs homolog 1A (yeast)       | 2               | 0               | 0                | 1.82043             |
| 368  | 78266   | Zfp687        | zinc finger protein 687                                                      | 2               | 0               | 0                | 1.814387            |
| 369  | 19157   | Pscd1         | cytohesin 1                                                                  | 2               | 0               | 0                | 1.814068            |
| 370  | 244653  | Hydin         | HYDIN, axonemal central pair apparatus protein                               | 3               | 0               | 0                | 1.813401            |
| 371  | 239667  | Al317237      | DIP2 disco-interacting protein 2 homolog B (Drosophila)                      | 2               | 0               | 0                | 1.809009            |
| 372  | 98985   | Al462438      | CLP1, cleavage and polyadenylation factor I subunit, homolog (S. cerevisiae) | 2               | 0               | 0                | 1.80868             |
| 373  | 17258   | Mef2a         | myocyte enhancer factor 2A                                                   | 2               | 0               | 0                | 1.804071            |
| 374  | 22793   | Zyx           | zyxin                                                                        | 2               | 0               | 0                | 1.7908              |

## Candidates for negative regulators of normal growth (DESeq)

| Rank | entrez# | Gene Symbol   | Gene name                                                                      | enriched shRNAs | depleted shRNAs | no change shRNAs | average Fold Change |
|------|---------|---------------|--------------------------------------------------------------------------------|-----------------|-----------------|------------------|---------------------|
| 375  | 67430   | 4921536K21Rik | RIKEN cDNA 4921536K21 gene                                                     | 2               | 0               | 0                | 1.790425            |
| 376  | 278180  | Vsig4         | V-set and immunoglobulin domain containing 4                                   | 2               | 0               | 0                | 1.789486            |
| 377  | 171463  | Il17rd        | interleukin 17 receptor D                                                      | 2               | 0               | 0                | 1.78786             |
| 378  | 13177   | Dci           | enoyl-Coenzyme A delta isomerase 1                                             | 2               | 0               | 0                | 1.787192            |
| 379  | 218503  | Fcho2         | FCH domain only 2                                                              | 2               | 0               | 0                | 1.786667            |
| 380  | 71790   | Anxa9         | annexin A9                                                                     | 2               | 0               | 0                | 1.783681            |
| 381  | 105377  | Ankrd32       | ankyrin repeat domain 32                                                       | 2               | 0               | 0                | 1.776161            |
| 382  | 545378  | Sh2d1b2       | SH2 domain protein 1B2                                                         | 2               | 0               | 0                | 1.774629            |
| 383  | 13494   | Drg1          | developmentally regulated GTP binding protein 1                                | 2               | 0               | 0                | 1.773803            |
| 384  | 14056   | Ezh2          | enhancer of zeste homolog 2 (Drosophila)                                       | 2               | 0               | 0                | 1.770795            |
| 385  | 64290   | Foxb1         | forkhead box B1                                                                | 2               | 0               | 0                | 1.768052            |
| 386  | 66863   | Lztr1         | leucine-zipper-like transcriptional regulator, 1                               | 2               | 0               | 0                | 1.766394            |
| 387  | 16709   | Ktn1          | kinectin 1                                                                     | 2               | 0               | 0                | 1.765867            |
| 388  | 76582   | Ipo11         | importin 11                                                                    | 2               | 0               | 0                | 1.765315            |
| 389  | 14616   | Gja8          | gap junction protein, alpha 8                                                  | 2               | 0               | 0                | 1.764153            |
| 390  | 226407  | Rab3gap1      | RAB3 GTPase activating protein subunit 1                                       | 2               | 0               | 0                | 1.764126            |
| 391  | 210622  | E430002G05Rik | peptidase domain containing associated with muscle regeneration 1              | 2               | 0               | 0                | 1.763119            |
| 392  | 20810   | Srm           | spermidine synthase                                                            | 2               | 0               | 0                | 1.757193            |
| 393  | 18616   | Peg3          | paternally expressed 3                                                         | 2               | 0               | 0                | 1.756688            |
| 394  | 19264   | Ptprc         | protein tyrosine phosphatase, receptor type, C                                 | 2               | 0               | 0                | 1.752664            |
| 395  | 50934   | Slc7a8        | solute carrier family 7 (cationic amino acid transporter, y+ system), member 8 | 2               | 0               | 0                | 1.752286            |
| 396  | 373864  | Col27a1       | collagen, type XXVII, alpha 1                                                  | 3               | 0               | 0                | 1.751581            |
| 397  | 20274   | Scn9a         | sodium channel, voltage-gated, type IX, alpha                                  | 2               | 0               | 0                | 1.751421            |
| 398  | 27392   | Pign          | phosphatidylinositol glycan anchor biosynthesis, class N                       | 2               | 0               | 0                | 1.750665            |
| 399  | 436569  | UNK           | NA                                                                             | 2               | 0               | 0                | 1.750284            |
| 400  | 232679  | Zc3hc1        | zinc finger, C3HC type 1                                                       | 2               | 0               | 0                | 1.750172            |
| 401  | 258868  | Olfir894      | olfactory receptor 894                                                         | 3               | 0               | 0                | 1.749941            |
| 402  | 70902   | 4921521K07Rik | lysophosphatidylcholine acyltransferase 2B                                     | 2               | 0               | 0                | 1.748155            |
| 403  | 224860  | Plcl2         | phospholipase C-like 2                                                         | 2               | 0               | 0                | 1.74367             |
| 404  | 13505   | Dsc1          | desmocollin 1                                                                  | 2               | 0               | 0                | 1.742365            |
| 405  | 17692   | Msl31         | male-specific lethal 3 homolog (Drosophila)                                    | 2               | 0               | 0                | 1.741908            |
| 406  | 20620   | Plk2          | polo-like kinase 2 (Drosophila)                                                | 3               | 0               | 0                | 1.741787            |
| 407  | 94332   | Igsf4b        | cell adhesion molecule 3                                                       | 2               | 0               | 0                | 1.741696            |
| 408  | 244180  | E030002O03Rik | RIKEN cDNA E030002O03 gene                                                     | 2               | 0               | 0                | 1.741411            |

## Candidates for negative regulators of normal growth (DESeq)

| Rank | entrez# | Gene Symbol   | Gene name                                                        | enriched shRNAs | depleted shRNAs | no change shRNAs | average Fold Change |
|------|---------|---------------|------------------------------------------------------------------|-----------------|-----------------|------------------|---------------------|
| 409  | 240168  | Rasgrp3       | RAS, guanyl releasing protein 3                                  | 2               | 0               | 0                | 1.741315            |
| 410  | 12672   | Chrm4         | cholinergic receptor, muscarinic 4                               | 2               | 0               | 0                | 1.740378            |
| 411  | 74851   | 4930408F14Rik | predicted gene 14354                                             | 2               | 0               | 0                | 1.739837            |
| 412  | 228642  | BC034902      | cDNA sequence BC034902                                           | 2               | 0               | 0                | 1.739791            |
| 413  | 109672  | Cyb5          | cytochrome b-5                                                   | 2               | 0               | 0                | 1.736374            |
| 414  | 109136  | Mmaa          | methylmalonic aciduria (cobalamin deficiency) type A             | 2               | 0               | 0                | 1.73604             |
| 415  | 237005  | UNK           | NA                                                               | 2               | 0               | 0                | 1.733428            |
| 416  | 26439   | Psg19         | pregnancy specific glycoprotein 19                               | 2               | 0               | 0                | 1.732314            |
| 417  | 74430   | 4930452B06Rik | RIKEN cDNA 4930452B06 gene                                       | 2               | 0               | 0                | 1.730274            |
| 418  | 19126   | Prom1         | prominin 1                                                       | 2               | 0               | 0                | 1.729118            |
| 419  | 626187  | UNK           | NA                                                               | 2               | 0               | 0                | 1.727734            |
| 420  | 65257   | Asb3          | ankyrin repeat and SOCS box-containing 3                         | 2               | 0               | 0                | 1.727614            |
| 421  | 29871   | Scmh1         | sex comb on midleg homolog 1                                     | 2               | 0               | 0                | 1.727188            |
| 422  | 67365   | Hdhd1a        | haloacid dehalogenase-like hydrolase domain containing 1A        | 2               | 0               | 0                | 1.726246            |
| 423  | 12915   | Crebl1        | activating transcription factor 6 beta                           | 2               | 0               | 0                | 1.725324            |
| 424  | 18584   | Pde8a         | phosphodiesterase 8A                                             | 2               | 0               | 0                | 1.725114            |
| 425  | 384283  | Gm1389        | NA                                                               | 2               | 0               | 0                | 1.724176            |
| 426  | 74066   | 4933404G15Rik | RIKEN cDNA 4933404G15 gene                                       | 2               | 0               | 0                | 1.721535            |
| 427  | 101320  | Dyrk4         | dual-specificity tyrosine-(Y)-phosphorylation regulated kinase 4 | 2               | 0               | 0                | 1.720536            |
| 428  | 20917   | Suclg2        | succinate-Coenzyme A ligase, GDP-forming, beta subunit           | 2               | 0               | 0                | 1.718238            |
| 429  | 234515  | Inpp4b        | inositol polyphosphate-4-phosphatase, type II                    | 2               | 0               | 0                | 1.713499            |
| 430  | 403088  | Eapa2         | family with sequence similarity 115, member E                    | 2               | 0               | 0                | 1.711136            |
| 431  | 69482   | Nup35         | nucleoporin 35                                                   | 2               | 0               | 0                | 1.710306            |
| 432  | 241568  | Lrrc4c        | leucine rich repeat containing 4C                                | 2               | 0               | 0                | 1.710135            |
| 433  | 22035   | Tnfsf10       | tumor necrosis factor (ligand) superfamily, member 10            | 2               | 0               | 0                | 1.710069            |
| 434  | 246256  | Fcgr3a        | Fc receptor, IgG, low affinity IV                                | 2               | 0               | 0                | 1.709692            |
| 435  | 18751   | Prkcb1        | protein kinase C, beta                                           | 2               | 0               | 0                | 1.709579            |
| 436  | 23797   | Akt3          | thymoma viral proto-oncogene 3                                   | 2               | 0               | 0                | 1.70887             |
| 437  | 28254   | Slco1a6       | solute carrier organic anion transporter family, member 1a6      | 2               | 0               | 0                | 1.706697            |
| 438  | 232946  | Bloc1s3       | biogenesis of lysosome-related organelles complex-1, subunit 3   | 2               | 0               | 0                | 1.706337            |
| 439  | 66482   | Exoc2         | exocyst complex component 2                                      | 3               | 0               | 0                | 1.705295            |
| 440  | 235628  | Tessp2        | protease, serine, 42                                             | 3               | 0               | 0                | 1.70248             |
| 441  | 209773  | Dennd2a       | DENN/MADD domain containing 2A                                   | 2               | 0               | 0                | 1.702369            |
| 442  | 77040   | Atg16l1       | autophagy-related 16-like 1 (yeast)                              | 3               | 0               | 0                | 1.699784            |



## Candidates for negative regulators of normal growth (DESeq)

| Rank | entrez# | Gene Symbol   | Gene name                                                           | enriched shRNAs | depleted shRNAs | no change shRNAs | average Fold Change |
|------|---------|---------------|---------------------------------------------------------------------|-----------------|-----------------|------------------|---------------------|
| 443  | 94215   | Ugt2a1        | UDP glucuronosyltransferase 2 family, polypeptide A1                | 2               | 0               | 0                | 1.693049            |
| 444  | 27402   | Pdhx          | pyruvate dehydrogenase complex, component X                         | 2               | 0               | 0                | 1.692339            |
| 445  | 320683  | Zfp629        | zinc finger protein 629                                             | 2               | 0               | 0                | 1.6922              |
| 446  | 68195   | Rnaset2       | ribonuclease T2B                                                    | 2               | 0               | 0                | 1.691798            |
| 447  | 16769   | Dsg4          | desmoglein 4                                                        | 3               | 0               | 0                | 1.688046            |
| 448  | 68278   | Ddx39         | DEAD (Asp-Glu-Ala-Asp) box polypeptide 39                           | 2               | 0               | 0                | 1.687817            |
| 449  | 26874   | Abcd2         | ATP-binding cassette, sub-family D (ALD), member 2                  | 2               | 0               | 0                | 1.686939            |
| 450  | 270893  | Tmem132e      | transmembrane protein 132E                                          | 2               | 0               | 0                | 1.684773            |
| 451  | 13595   | Ebp           | phenylalkylamine Ca2+ antagonist (emopamil) binding protein         | 2               | 0               | 0                | 1.682808            |
| 452  | 54678   | Zfp108        | zinc finger protein 108                                             | 2               | 0               | 0                | 1.682443            |
| 453  | 22258   | Usp4          | ubiquitin specific peptidase 4 (proto-oncogene)                     | 2               | 0               | 0                | 1.682021            |
| 454  | 12916   | Crem          | cAMP responsive element modulator                                   | 3               | 0               | 0                | 1.680637            |
| 455  | 18844   | Plxna1        | plexin A1                                                           | 3               | 0               | 0                | 1.680592            |
| 456  | 545047  | MGC118309     | predicted gene 5800                                                 | 2               | 0               | 0                | 1.677681            |
| 457  | 18663   | Pgk2          | phosphoglycerate kinase 2                                           | 2               | 0               | 0                | 1.676287            |
| 458  | 20411   | Sorbs1        | sorbin and SH3 domain containing 1                                  | 2               | 0               | 0                | 1.673918            |
| 459  | 21857   | Timp1         | tissue inhibitor of metalloproteinase 1                             | 2               | 0               | 0                | 1.672744            |
| 460  | 102060  | Gadd45gip1    | growth arrest and DNA-damage-inducible, gamma interacting protein 1 | 2               | 0               | 0                | 1.671874            |
| 461  | 19141   | Lgmn          | legumain                                                            | 2               | 0               | 0                | 1.66694             |
| 462  | 228019  | Mettl8        | methyltransferase like 8                                            | 2               | 0               | 0                | 1.662049            |
| 463  | 211548  | Nomo1         | nodal modulator 1                                                   | 2               | 0               | 0                | 1.659142            |
| 464  | 109820  | Pgc           | progastricsin (pepsinogen C)                                        | 2               | 0               | 0                | 1.657534            |
| 465  | 227377  | Farp2         | FERM, RhoGEF and pleckstrin domain protein 2                        | 2               | 0               | 0                | 1.6573              |
| 466  | 19385   | Ranbp1        | RAN binding protein 1                                               | 2               | 0               | 0                | 1.656777            |
| 467  | 209324  | Stfna3l1      | predicted gene 4758                                                 | 4               | 0               | 0                | 1.653126            |
| 468  | 19743   | Rhag          | Rhesus blood group-associated A glycoprotein                        | 2               | 0               | 0                | 1.646375            |
| 469  | 83925   | Trps1         | trichorhinophalangeal syndrome I (human)                            | 2               | 0               | 0                | 1.640717            |
| 470  | 80285   | Parp9         | poly (ADP-ribose) polymerase family, member 9                       | 2               | 0               | 0                | 1.636157            |
| 471  | 94047   | Cecr6         | cat eye syndrome chromosome region, candidate 6 homolog (human)     | 2               | 0               | 0                | 1.633798            |
| 472  | 269252  | Gtf3c4        | general transcription factor IIIC, polypeptide 4                    | 2               | 0               | 0                | 1.630269            |
| 473  | 72199   | Mms19l        | MMS19 (MET18 S. cerevisiae)                                         | 2               | 0               | 0                | 1.625135            |
| 474  | 20916   | Sucla2        | succinate-Coenzyme A ligase, ADP-forming, beta subunit              | 2               | 0               | 0                | 1.621663            |
| 475  | 72400   | 2610028A01Rik | PIN2/TERF1 interacting, telomerase inhibitor 1                      | 2               | 0               | 0                | 1.616748            |
| 476  | 52250   | Reep1         | receptor accessory protein 1                                        | 2               | 0               | 0                | 1.616634            |

## Candidates for negative regulators of normal growth (DESeq)

| Rank | entrez# | Gene Symbol   | Gene name                                                           | enriched shRNAs | depleted shRNAs | no change shRNAs | average Fold Change |
|------|---------|---------------|---------------------------------------------------------------------|-----------------|-----------------|------------------|---------------------|
| 477  | 232409  | Clec2e        | C-type lectin domain family 2, member e                             | 2               | 0               | 0                | 1.61472             |
| 478  | 11677   | Akr1b3        | aldo-keto reductase family 1, member B3 (aldose reductase)          | 2               | 0               | 0                | 1.614617            |
| 479  | 15288   | Hmbs          | hydroxymethylbilane synthase                                        | 2               | 0               | 0                | 1.612163            |
| 480  | 233876  | Hirip3        | HIRA interacting protein 3                                          | 2               | 0               | 0                | 1.611381            |
| 481  | 226245  | 9930023K05Rik | RIKEN cDNA 9930023K05 gene                                          | 2               | 0               | 0                | 1.608284            |
| 482  | 76365   | Tbx18         | T-box18                                                             | 2               | 0               | 0                | 1.608102            |
| 483  | 11839   | Areg          | amphiregulin                                                        | 2               | 0               | 0                | 1.606908            |
| 484  | 383133  | UNK           | NA                                                                  | 2               | 0               | 0                | 1.606148            |
| 485  | 237029  | 4932411N23Rik | RIKEN cDNA 4932411N23 gene                                          | 2               | 0               | 0                | 1.604769            |
| 486  | 68083   | Pak1ip1       | PAK1 interacting protein 1                                          | 2               | 0               | 0                | 1.602799            |
| 487  | 22202   | Ube1y1        | ubiquitin-activating enzyme E1, Chr Y 1                             | 2               | 0               | 0                | 1.602372            |
| 488  | 66449   | Magmas        | presequence translocase-associated motor 16 homolog (S. cerevisiae) | 2               | 0               | 0                | 1.600658            |
| 489  | 16528   | Kcnk4         | potassium channel, subfamily K, member 4                            | 2               | 0               | 0                | 1.599341            |
| 490  | 11600   | Angpt1        | angiopoietin 1                                                      | 2               | 0               | 0                | 1.598571            |
| 491  | 80294   | Pofut2        | protein O-fucosyltransferase 2                                      | 2               | 0               | 0                | 1.597918            |
| 492  | 12267   | C3ar1         | complement component 3a receptor 1                                  | 2               | 0               | 0                | 1.597268            |
| 493  | 57743   | Sec61a2       | Sec61, alpha subunit 2 (S. cerevisiae)                              | 2               | 0               | 0                | 1.595019            |
| 494  | 13114   | Cyp3a16       | cytochrome P450, family 3, subfamily a, polypeptide 16              | 3               | 0               | 0                | 1.594904            |
| 495  | 75528   | 1700018L24Rik | RIKEN cDNA 1700018L24 gene                                          | 2               | 0               | 0                | 1.593652            |
| 496  | 234678  | D230025D16Rik | RIKEN cDNA D230025D16 gene                                          | 2               | 0               | 0                | 1.588997            |
| 497  | 65114   | Vps35         | vacuolar protein sorting 35                                         | 2               | 0               | 0                | 1.587887            |
| 498  | 320022  | 4930532D21Rik | coiled-coil domain containing 79                                    | 2               | 0               | 0                | 1.587847            |
| 499  | 12864   | Cox6c         | cytochrome c oxidase, subunit VIc                                   | 2               | 0               | 0                | 1.58773             |
| 500  | 386655  | Cri2          | EP300 interacting inhibitor of differentiation 2                    | 2               | 0               | 0                | 1.586717            |
| 501  | 106947  | Slc39a3       | solute carrier family 39 (zinc transporter), member 3               | 2               | 0               | 0                | 1.583463            |
| 502  | 258866  | Olf1008       | olfactory receptor 1008                                             | 2               | 0               | 0                | 1.58133             |
| 503  | 76899   | Golga1        | golgi autoantigen, golgin subfamily a, 1                            | 2               | 0               | 0                | 1.57765             |
| 504  | 73010   | Gpr22         | G protein-coupled receptor 22                                       | 2               | 0               | 0                | 1.575501            |
| 505  | 387356  | Tas2r131      | taste receptor, type 2, member 131                                  | 2               | 0               | 0                | 1.571658            |
| 506  | 109575  | Tbx10         | T-box 10                                                            | 2               | 0               | 0                | 1.571207            |
| 507  | 12023   | Barx2         | BarH-like homeobox 2                                                | 3               | 0               | 0                | 1.57084             |
| 508  | 211430  | 4930533C12Rik | fer-1-like 5 (C. elegans)                                           | 3               | 0               | 0                | 1.570024            |
| 509  | 209203  | UNK           | NA                                                                  | 2               | 0               | 0                | 1.568678            |
| 510  | 67282   | Ccdc53        | coiled-coil domain containing 53                                    | 2               | 0               | 0                | 1.566525            |

### Candidates for negative regulators of normal growth (DESeq)

| Rank | entrez# | Gene Symbol   | Gene name                                                       | enriched shRNAs | depleted shRNAs | no change shRNAs | average Fold Change |
|------|---------|---------------|-----------------------------------------------------------------|-----------------|-----------------|------------------|---------------------|
| 511  | 65246   | Xpo7          | exportin 7                                                      | 2               | 0               | 0                | 1.565255            |
| 512  | 216225  | Slc5a8        | solute carrier family 5 (iodide transporter), member 8          | 2               | 0               | 0                | 1.561888            |
| 513  | 12350   | Car3          | carbonic anhydrase 3                                            | 2               | 0               | 0                | 1.559522            |
| 514  | 66067   | Gtpbp8        | GTP-binding protein 8 (putative)                                | 2               | 0               | 0                | 1.556504            |
| 515  | 212670  | Catsper2      | cation channel, sperm associated 2                              | 2               | 0               | 0                | 1.556443            |
| 516  | 234988  | Mbd3l2        | methyl-CpG binding domain protein 3-like 2                      | 2               | 0               | 0                | 1.556292            |
| 517  | 217365  | Nploc4        | nuclear protein localization 4 homolog ( <i>S. cerevisiae</i> ) | 2               | 0               | 0                | 1.554039            |
| 518  | 27273   | Pdk4          | pyruvate dehydrogenase kinase, isoenzyme 4                      | 2               | 0               | 0                | 1.549834            |
| 519  | 232210  | 8430410A17Rik | RIKEN cDNA 8430410A17 gene                                      | 2               | 0               | 0                | 1.547106            |
| 520  | 67164   | 2610209A20Rik | lipoyl(octanoyl) transferase 2 (putative)                       | 2               | 0               | 0                | 1.545511            |
| 521  | 76820   | D12Erd553e    | family with sequence similarity 49, member A                    | 2               | 0               | 0                | 1.542757            |
| 522  | 12946   | Crry          | complement component (3b/4b) receptor 1-like                    | 2               | 0               | 0                | 1.534408            |
| 523  | 404312  | Olfir250      | olfactory receptor 250                                          | 2               | 0               | 0                | 1.531132            |
| 524  | 68904   | Abhd13        | abhydrolase domain containing 13                                | 2               | 0               | 0                | 1.527763            |
| 525  | 258639  | Olfir1158     | olfactory receptor 1158                                         | 2               | 0               | 0                | 1.525582            |
| 526  | 239611  | Muc19         | mucin 19                                                        | 2               | 0               | 0                | 1.524904            |
| 527  | 71468   | Obox1         | oocyte specific homeobox 1                                      | 2               | 0               | 0                | 1.524111            |
| 528  | 15958   | Ifit2         | interferon-induced protein with tetratricopeptide repeats 2     | 2               | 0               | 0                | 1.523304            |
| 529  | 22750   | Zfp9          | zinc finger protein 9                                           | 2               | 0               | 0                | 1.520118            |
| 530  | 258464  | Olfir1384     | olfactory receptor 1384                                         | 2               | 0               | 0                | 1.51843             |
| 531  | 71877   | Efhc1         | EF-hand domain (C-terminal) containing 1                        | 2               | 0               | 0                | 1.517156            |
| 532  | 68059   | Tm9sf2        | transmembrane 9 superfamily member 2                            | 2               | 0               | 0                | 1.513544            |
| 533  | 83671   | Syt12         | synaptotagmin-like 2                                            | 3               | 0               | 0                | 1.510559            |
| 534  | 20466   | Sin3a         | transcriptional regulator, SIN3A (yeast)                        | 2               | 0               | 0                | 1.508565            |
| 535  | 246727  | Oas3          | 2'-5' oligoadenylate synthetase 3                               | 2               | 0               | 0                | 1.507793            |
| 536  | 29817   | Igfbp7        | insulin-like growth factor binding protein 7                    | 2               | 0               | 0                | 1.507274            |
| 537  | 27967   | Cherp         | calcium homeostasis endoplasmic reticulum protein               | 2               | 0               | 0                | 1.505072            |
| 538  | 71729   | Rgs12         | regulator of G-protein signaling 12                             | 2               | 0               | 0                | 1.50489             |
| 539  | 170460  | Stard5        | StAR-related lipid transfer (START) domain containing 5         | 2               | 0               | 0                | 1.502445            |

## Supplementary Table 2. Putative regulators of normal growth identified by Fisher's exact test of pooled samples.

Note: Candidates identified by both DESeq and Fisher's exact test are highlighted in green.

Candidates for positive regulators of normal growth (Fisher's)

| Rank | entrez# | Gene Symbol | Gene name                                                              | enriched shRNAs | depleted shRNAs | no change shRNAs | average Fold Change |
|------|---------|-------------|------------------------------------------------------------------------|-----------------|-----------------|------------------|---------------------|
| 1    | 16785   | Rpsa        | ribosomal protein SA                                                   | 0               | 4               | 1                | -3.73851            |
| 2    | 20643   | Snrpe       | small nuclear ribonucleoprotein E                                      | 0               | 4               | 1                | -3.57433            |
| 3    | 67671   | Rpl38       | ribosomal protein L38                                                  | 0               | 5               | 0                | -3.50838            |
| 4    | 19946   | Rpl30       | ribosomal protein L30                                                  | 0               | 5               | 0                | -3.1928             |
| 5    | 53817   | Bat1a       | DEAD (Asp-Glu-Ala-Asp) box polypeptide 39B                             | 0               | 4               | 1                | -3.11671            |
| 6    | 20102   | Rps4x       | ribosomal protein S4, X-linked                                         | 0               | 5               | 0                | -3.11064            |
| 7    | 208967  | Thnsl1      | threonine synthase-like 1 (bacterial)                                  | 0               | 4               | 1                | -3.1023             |
| 8    | 27370   | Rps26       | ribosomal protein S26                                                  | 0               | 4               | 1                | -3.09298            |
| 9    | 20088   | Rps24       | ribosomal protein S24                                                  | 0               | 4               | 1                | -3.06523            |
| 10   | 110750  | Cse1l       | chromosome segregation 1-like ( <i>S. cerevisiae</i> )                 | 0               | 4               | 1                | -3.06462            |
| 11   | 113847  | V1ra5       | vomeronal 1 receptor 43                                                | 0               | 3               | 2                | -3.06325            |
| 12   | 81845   | Bat4        | G patch domain and ankyrin repeats 1                                   | 0               | 3               | 2                | -3.05406            |
| 13   | 66373   | Lsm5        | LSM5 homolog, U6 small nuclear RNA associated ( <i>S. cerevisiae</i> ) | 0               | 3               | 2                | -3.04212            |
| 14   | 69786   | Tprkb       | Tp53rk binding protein                                                 | 0               | 3               | 1                | -3.02671            |
| 15   | 213469  | Lgi3        | leucine-rich repeat LGI family, member 3                               | 0               | 3               | 1                | -2.97588            |
| 16   | 75062   | Sf3a3       | splicing factor 3a, subunit 3                                          | 0               | 3               | 1                | -2.96977            |
| 17   | 268449  | Rpl23a      | ribosomal protein L23A                                                 | 0               | 4               | 1                | -2.96016            |
| 18   | 20116   | Rps8        | ribosomal protein S8                                                   | 0               | 4               | 1                | -2.95521            |
| 19   | 20091   | Rps3a       | ribosomal protein S3A                                                  | 0               | 4               | 1                | -2.95033            |
| 20   | 20104   | Rps6        | ribosomal protein S6                                                   | 0               | 4               | 1                | -2.93698            |
| 21   | 27050   | Rps3        | ribosomal protein S3                                                   | 0               | 5               | 0                | -2.90537            |
| 22   | 65019   | Rpl23       | ribosomal protein L23                                                  | 0               | 4               | 1                | -2.90331            |
| 23   | 208634  | Tspan10     | tetraspanin 10                                                         | 0               | 4               | 1                | -2.90191            |
| 24   | 66878   | RioK3       | RIO kinase 3 (yeast)                                                   | 0               | 3               | 2                | -2.86003            |
| 25   | 93687   | Csnk1a1     | casein kinase 1, alpha 1                                               | 0               | 3               | 2                | -2.83069            |
| 26   | 18249   | Obp1a       | odorant binding protein 1a                                             | 0               | 3               | 2                | -2.79845            |
| 27   | 20103   | Rps5        | ribosomal protein S5                                                   | 0               | 5               | 0                | -2.79677            |
| 28   | 12043   | Bcl2        | B cell leukemia/lymphoma 2                                             | 0               | 3               | 1                | -2.76514            |
| 29   | 16391   | Isgf3g      | interferon regulatory factor 9                                         | 0               | 3               | 2                | -2.75037            |
| 30   | 67097   | Rps10       | ribosomal protein S10                                                  | 0               | 4               | 1                | -2.7329             |
| 31   | 19983   | Rpl5        | NA                                                                     | 0               | 4               | 1                | -2.72904            |
| 32   | 434683  | UNK         | NA                                                                     | 0               | 3               | 2                | -2.71542            |
| 33   | 170768  | Pfkfb3      | 6-phosphofructo-2-kinase/fructose-2,6-biphosphatase 3                  | 0               | 3               | 2                | -2.71376            |

Candidates for positive regulators of normal growth (Fisher's)

| Rank | entrez# | Gene Symbol   | Gene name                                                  | enriched shRNAs | depleted shRNAs | no change shRNAs | average Fold Change |
|------|---------|---------------|------------------------------------------------------------|-----------------|-----------------|------------------|---------------------|
| 34   | 60411   | Cenpk         | centromere protein K                                       | 0               | 4               | 1                | -2.71062            |
| 35   | 21372   | Tbl1x         | transducin (beta)-like 1 X-linked                          | 0               | 3               | 2                | -2.70554            |
| 36   | 21682   | Tec           | tec protein tyrosine kinase                                | 0               | 3               | 2                | -2.68084            |
| 37   | 270106  | Rpl13         | ribosomal protein L13                                      | 0               | 3               | 2                | -2.66367            |
| 38   | 171195  | V1rc22        | vomeronasal 1 receptor 30                                  | 0               | 3               | 2                | -2.65768            |
| 39   | 109754  | Cyb5r3        | cytochrome b5 reductase 3                                  | 0               | 3               | 2                | -2.65401            |
| 40   | 106582  | Nrm           | nurim (nuclear envelope membrane protein)                  | 0               | 3               | 1                | -2.65215            |
| 41   | 268935  | Scube3        | signal peptide, CUB domain, EGF-like 3                     | 0               | 3               | 2                | -2.64676            |
| 42   | 101943  | Sf3b3         | splicing factor 3b, subunit 3                              | 0               | 3               | 2                | -2.64643            |
| 43   | 66616   | Snx9          | sorting nexin 9                                            | 0               | 3               | 2                | -2.62609            |
| 44   | 114641  | Rpl31         | ribosomal protein L31                                      | 0               | 3               | 2                | -2.61387            |
| 45   | 17463   | Psmc7         | proteasome (prosome, macropain) 26S subunit, non-ATPase, 7 | 0               | 3               | 2                | -2.61284            |
| 46   | 12464   | Cct4          | chaperonin containing Tcp1, subunit 4 (delta)              | 0               | 4               | 1                | -2.61257            |
| 47   | 94185   | Tnfrsf21      | tumor necrosis factor receptor superfamily, member 21      | 0               | 3               | 2                | -2.59893            |
| 48   | 12391   | Cav3          | caveolin 3                                                 | 0               | 3               | 2                | -2.59791            |
| 49   | 11837   | Arbp          | ribosomal protein, large, P0                               | 0               | 4               | 1                | -2.58876            |
| 50   | 67115   | Rpl14         | ribosomal protein L14                                      | 0               | 5               | 0                | -2.58114            |
| 51   | 217692  | Sipa11l       | signal-induced proliferation-associated 1 like 1           | 0               | 3               | 2                | -2.56815            |
| 52   | 16363   | Irf2          | interferon regulatory factor 2                             | 0               | 3               | 2                | -2.56386            |
| 53   | 383042  | UNK           | NA                                                         | 0               | 3               | 2                | -2.56245            |
| 54   | 17096   | Lyn           | Yamaguchi sarcoma viral (v-src) oncogene homolog           | 0               | 3               | 2                | -2.55424            |
| 55   | 22003   | Tpm1          | tropomyosin 1, alpha                                       | 0               | 3               | 2                | -2.55011            |
| 56   | 14913   | Guca1a        | guanylate cyclase activator 1a (retina)                    | 0               | 3               | 2                | -2.54672            |
| 57   | 12696   | Cirbp         | cold inducible RNA binding protein                         | 0               | 3               | 1                | -2.52649            |
| 58   | 17829   | Muc1          | mucin 1, transmembrane                                     | 0               | 3               | 2                | -2.52512            |
| 59   | 66475   | Rps23         | ribosomal protein S23                                      | 0               | 4               | 1                | -2.52035            |
| 60   | 50797   | Copb2         | coatamer protein complex, subunit beta 2 (beta prime)      | 0               | 4               | 1                | -2.51143            |
| 61   | 81898   | Sf3b1         | splicing factor 3b, subunit 1                              | 0               | 4               | 1                | -2.51126            |
| 62   | 14916   | Guca2b        | guanylate cyclase activator 2b (retina)                    | 0               | 3               | 2                | -2.50751            |
| 63   | 19822   | Rnf4          | ring finger protein 4                                      | 0               | 3               | 2                | -2.50697            |
| 64   | 67603   | Dusp6         | dual specificity phosphatase 6                             | 0               | 3               | 2                | -2.49794            |
| 65   | 26381   | Esrrg         | estrogen-related receptor gamma                            | 0               | 3               | 2                | -2.47821            |
| 66   | 20379   | Sfrp4         | secreted frizzled-related protein 4                        | 0               | 3               | 2                | -2.47261            |
| 67   | 76789   | 2410129H14Rik | mitotic spindle organizing protein 1                       | 0               | 3               | 1                | -2.47259            |
| 68   | 13488   | Drd1a         | dopamine receptor D1A                                      | 0               | 3               | 2                | -2.47239            |
| 69   | 16341   | Eif3s6        | eukaryotic translation initiation factor 3, subunit E      | 0               | 3               | 2                | -2.47048            |
| 70   | 56347   | Eif3s8        | eukaryotic translation initiation factor 3, subunit C      | 0               | 5               | 0                | -2.4668             |

Candidates for positive regulators of normal growth (Fisher's)

| Rank | entrez# | Gene Symbol   | Gene name                                                                                        | enriched shRNAs | depleted shRNAs | no change shRNAs | average Fold Change |
|------|---------|---------------|--------------------------------------------------------------------------------------------------|-----------------|-----------------|------------------|---------------------|
| 71   | 71954   | 2400003N08Rik | suppressor of defective silencing 3 homolog (S. cerevisiae)                                      | 0               | 3               | 2                | -2.46338            |
| 72   | 56353   | Rybp          | RING1 and YY1 binding protein                                                                    | 0               | 3               | 2                | -2.45901            |
| 73   | 72308   | Brf1          | BRF1 homolog, subunit of RNA polymerase III transcription initiation factor IIIB (S. cerevisiae) | 0               | 3               | 2                | -2.45429            |
| 74   | 17219   | Mcm6          | minichromosome maintenance deficient 6 (MIS5 homolog, S. pombe) (S. cerevisiae)                  | 0               | 3               | 2                | -2.45243            |
| 75   | 214253  | Etnk2         | ethanolamine kinase 2                                                                            | 0               | 4               | 1                | -2.44912            |
| 76   | 76499   | Clasp2        | CLIP associating protein 2                                                                       | 0               | 3               | 2                | -2.43604            |
| 77   | 14469   | Gbp2          | guanylate binding protein 2                                                                      | 0               | 3               | 2                | -2.43039            |
| 78   | 53356   | Eif3s4        | eukaryotic translation initiation factor 3, subunit G                                            | 0               | 4               | 0                | -2.42344            |
| 79   | 68314   | 0610008F07Rik | RIKEN cDNA 0610008F07 gene                                                                       | 0               | 3               | 1                | -2.42185            |
| 80   | 245026  | E330026B02Rik | collagen, type VI, alpha 6                                                                       | 0               | 3               | 2                | -2.4188             |
| 81   | 72821   | Scn2b         | sodium channel, voltage-gated, type II, beta                                                     | 0               | 3               | 2                | -2.41674            |
| 82   | 93670   | Tac4          | tachykinin 4                                                                                     | 0               | 3               | 2                | -2.4163             |
| 83   | 17246   | Mdm2          | transformed mouse 3T3 cell double minute 2                                                       | 0               | 4               | 1                | -2.41225            |
| 84   | 19899   | Rpl18         | ribosomal protein L18                                                                            | 0               | 5               | 0                | -2.40962            |
| 85   | 104831  | Ptpn23        | protein tyrosine phosphatase, non-receptor type 23                                               | 0               | 4               | 1                | -2.40478            |
| 86   | 14694   | Gnb2l1        | guanine nucleotide binding protein (G protein), beta polypeptide 2 like 1                        | 0               | 6               | 4                | -2.40441            |
| 87   | 18438   | P2rx4         | purinergic receptor P2X, ligand-gated ion channel 4                                              | 0               | 3               | 2                | -2.40093            |
| 88   | 406186  | Olf1r142      | olfactory receptor 142                                                                           | 0               | 3               | 2                | -2.39986            |
| 89   | 192170  | Ddx48         | eukaryotic translation initiation factor 4A3                                                     | 0               | 3               | 2                | -2.39519            |
| 90   | 66711   | Sbds          | Shwachman-Bodian-Diamond syndrome homolog (human)                                                | 0               | 3               | 2                | -2.39422            |
| 91   | 66085   | Eif3s5        | eukaryotic translation initiation factor 3, subunit F                                            | 0               | 3               | 1                | -2.39358            |
| 92   | 14113   | Fbl           | fibrillarin                                                                                      | 0               | 3               | 2                | -2.39186            |
| 93   | 233437  | F830104D24Rik | vomer nasal 2, receptor 66                                                                       | 0               | 3               | 2                | -2.39086            |
| 94   | 235184  | BC024479      | cDNA sequence BC024479                                                                           | 0               | 4               | 1                | -2.38992            |
| 95   | 14028   | Evx1          | even skipped homeotic gene 1 homolog                                                             | 0               | 3               | 2                | -2.38922            |
| 96   | 16898   | Rps2          | ribosomal protein S2                                                                             | 0               | 3               | 2                | -2.38715            |
| 97   | 66970   | Ssbp2         | single-stranded DNA binding protein 2                                                            | 0               | 3               | 2                | -2.38529            |
| 98   | 72843   | Prdm4         | PR domain containing 4                                                                           | 0               | 3               | 2                | -2.38294            |
| 99   | 75805   | Nln           | neurolysin (metallopeptidase M3 family)                                                          | 0               | 5               | 0                | -2.3826             |
| 100  | 93726   | Ear11         | eosinophil-associated, ribonuclease A family, member 11                                          | 0               | 3               | 2                | -2.38183            |
| 101  | 22700   | Zfp40         | zinc finger protein 40                                                                           | 0               | 3               | 2                | -2.38035            |
| 102  | 102436  | Lars2         | leucyl-tRNA synthetase, mitochondrial                                                            | 0               | 3               | 2                | -2.38022            |
| 103  | 387343  | Tas2r109      | taste receptor, type 2, member 109                                                               | 0               | 3               | 1                | -2.37994            |
| 104  | 81879   | Tcfcp2l1      | transcription factor CP2-like 1                                                                  | 0               | 3               | 2                | -2.37852            |
| 105  | 210126  | Lpp           | LIM domain containing preferred translocation partner in lipoma                                  | 0               | 4               | 1                | -2.37477            |
| 106  | 83453   | Chrd1         | chordin-like 1                                                                                   | 0               | 3               | 1                | -2.37236            |
| 107  | 66433   | Chchd7        | coiled-coil-helix-coiled-coil-helix domain containing 7                                          | 0               | 3               | 1                | -2.36488            |

Candidates for positive regulators of normal growth (Fisher's)

| Rank | entrez# | Gene Symbol   | Gene name                                                                                           | enriched shRNAs | depleted shRNAs | no change shRNAs | average Fold Change |
|------|---------|---------------|-----------------------------------------------------------------------------------------------------|-----------------|-----------------|------------------|---------------------|
| 108  | 68436   | 1100001I22Rik | ribosomal protein L34                                                                               | 0               | 7               | 3                | -2.36449            |
| 109  | 194456  | UNK           | NA                                                                                                  | 0               | 3               | 2                | -2.36422            |
| 110  | 320118  | Fbxl13        | F-box and leucine-rich repeat protein 13                                                            | 0               | 3               | 2                | -2.35879            |
| 111  | 67848   | Ddx55         | DEAD (Asp-Glu-Ala-Asp) box polypeptide 55                                                           | 0               | 3               | 2                | -2.3586             |
| 112  | 20400   | Sh2d1a        | SH2 domain protein 1A                                                                               | 0               | 3               | 2                | -2.35639            |
| 113  | 109095  | Rbm15b        | RNA binding motif protein 15B                                                                       | 0               | 4               | 1                | -2.35399            |
| 114  | 12466   | Cct6a         | chaperonin containing Tcp1, subunit 6a (zeta)                                                       | 0               | 4               | 1                | -2.35346            |
| 115  | 66480   | Rpl15         | ribosomal protein L15                                                                               | 0               | 3               | 2                | -2.35048            |
| 116  | 68052   | Rps13         | ribosomal protein S13                                                                               | 0               | 5               | 0                | -2.34452            |
| 117  | 19112   | Prlpc1        | prolactin family 8, subfamily a, member 6                                                           | 0               | 4               | 1                | -2.34412            |
| 118  | 107999  | Gtpbp6        | GTP binding protein 6 (putative)                                                                    | 0               | 4               | 0                | -2.34102            |
| 119  | 27367   | Rpl3          | ribosomal protein L3                                                                                | 0               | 4               | 1                | -2.33917            |
| 120  | 433926  | Lrrc8b        | leucine rich repeat containing 8 family, member B                                                   | 0               | 3               | 2                | -2.33635            |
| 121  | 217119  | Xylt2         | xylosyltransferase II                                                                               | 0               | 3               | 2                | -2.33533            |
| 122  | 75985   | Rab30         | RAB30, member RAS oncogene family                                                                   | 0               | 3               | 2                | -2.33527            |
| 123  | 53382   | Txn1          | thioredoxin-like 1                                                                                  | 0               | 4               | 0                | -2.33337            |
| 124  | 20448   | St6galnac4    | ST6 (alpha-N-acetyl-neuraminy-2,3-beta-galactosyl-1,3)-N-acetylgalactosaminide alpha-2,6-sialyltran | 0               | 4               | 1                | -2.33168            |
| 125  | 27207   | Rps11         | ribosomal protein S11                                                                               | 0               | 5               | 0                | -2.32864            |
| 126  | 66489   | Rpl35         | ribosomal protein L35                                                                               | 0               | 4               | 1                | -2.32661            |
| 127  | 403200  | 4930504O13Rik | RIKEN cDNA 4930504O13 gene                                                                          | 0               | 3               | 2                | -2.32624            |
| 128  | 22348   | Slc32a1       | solute carrier family 32 (GABA vesicular transporter), member 1                                     | 0               | 3               | 2                | -2.32328            |
| 129  | 380795  | AI324046      | Immunoglobulin heavy constant gamma 3                                                               | 0               | 4               | 1                | -2.32193            |
| 130  | 20637   | Snrp70        | small nuclear ribonucleoprotein 70 (U1)                                                             | 0               | 3               | 2                | -2.32129            |
| 131  | 76522   | Lsm8          | N(alpha)-acetyltransferase 38, NatC auxiliary subunit                                               | 0               | 4               | 1                | -2.32085            |
| 132  | 22186   | Uba52         | ubiquitin A-52 residue ribosomal protein fusion product 1                                           | 0               | 3               | 2                | -2.32043            |
| 133  | 68770   | Phtf2         | putative homeodomain transcription factor 2                                                         | 0               | 3               | 2                | -2.31846            |
| 134  | 353172  | Gars          | glycyl-tRNA synthetase                                                                              | 0               | 4               | 1                | -2.3174             |
| 135  | 16509   | Kcne1         | potassium voltage-gated channel, Isk-related subfamily, member 1                                    | 0               | 3               | 2                | -2.31518            |
| 136  | 15497   | Hsd3b6        | hydroxy-delta-5-steroid dehydrogenase, 3 beta- and steroid delta-isomerase 6                        | 0               | 4               | 1                | -2.31431            |
| 137  | 11787   | Apbb2         | amyloid beta (A4) precursor protein-binding, family B, member 2                                     | 0               | 4               | 1                | -2.30689            |
| 138  | 17975   | Ncl           | nucleolin                                                                                           | 0               | 5               | 0                | -2.30159            |
| 139  | 11905   | Serpinc1      | serine (or cysteine) peptidase inhibitor, clade C (antithrombin), member 1                          | 0               | 3               | 2                | -2.29983            |
| 140  | 227733  | Pip5kl1       | phosphatidylinositol-4-phosphate 5-kinase-like 1                                                    | 0               | 3               | 2                | -2.29908            |
| 141  | 68048   | Isg2011       | apoptosis enhancing nuclease                                                                        | 0               | 3               | 2                | -2.29785            |
| 142  | 15425   | Hoxc6         | homeobox C6                                                                                         | 0               | 3               | 2                | -2.29738            |
| 143  | 110809  | Sfrs1         | serine/arginine-rich splicing factor 1                                                              | 0               | 3               | 2                | -2.29634            |
| 144  | 11632   | Aip           | aryl-hydrocarbon receptor-interacting protein                                                       | 0               | 3               | 2                | -2.29492            |

Candidates for positive regulators of normal growth (Fisher's)

| Rank | entrez# | Gene Symbol   | Gene name                                                                    | enriched shRNAs | depleted shRNAs | no change shRNAs | average Fold Change |
|------|---------|---------------|------------------------------------------------------------------------------|-----------------|-----------------|------------------|---------------------|
| 145  | 67678   | Lsm3          | LSM3 homolog, U6 small nuclear RNA associated ( <i>S. cerevisiae</i> )       | 0               | 4               | 1                | -2.29339            |
| 146  | 11571   | Crisp1        | cysteine-rich secretory protein 1                                            | 0               | 3               | 2                | -2.2923             |
| 147  | 110521  | Hivep1        | human immunodeficiency virus type I enhancer binding protein 1               | 0               | 3               | 2                | -2.29145            |
| 148  | 67332   | Snrpd3        | small nuclear ribonucleoprotein D3                                           | 0               | 5               | 0                | -2.29063            |
| 149  | 64436   | Inpp5e        | inositol polyphosphate-5-phosphatase E                                       | 0               | 5               | 0                | -2.28828            |
| 150  | 20923   | Supt4h2       | NA                                                                           | 0               | 3               | 2                | -2.28676            |
| 151  | 73182   | 3110045G13Rik | platelet endothelial aggregation receptor 1                                  | 0               | 3               | 2                | -2.28516            |
| 152  | 21881   | Tkt           | transketolase                                                                | 0               | 3               | 2                | -2.28385            |
| 153  | 75434   | 1700001C02Rik | RIKEN cDNA 1700001C02 gene                                                   | 0               | 3               | 2                | -2.28033            |
| 154  | 100066  | Cyp2j11       | cytochrome P450, family 2, subfamily j, polypeptide 11                       | 0               | 3               | 2                | -2.28032            |
| 155  | 53318   | Pdlim3        | PDZ and LIM domain 3                                                         | 0               | 3               | 2                | -2.2778             |
| 156  | 21346   | Tagln2        | transgelin 2                                                                 | 0               | 3               | 2                | -2.27641            |
| 157  | 56529   | Sec111        | SEC11 homolog A ( <i>S. cerevisiae</i> )                                     | 0               | 3               | 2                | -2.27513            |
| 158  | 68365   | Rab14         | RAB14, member RAS oncogene family                                            | 0               | 4               | 1                | -2.2751             |
| 159  | 433297  | LOC433297     | myosin, light polypeptide 6, alkali, smooth muscle and non-muscle pseudogene | 0               | 3               | 2                | -2.27385            |
| 160  | 245663  | LOC245663     | prohibitin pseudogene                                                        | 0               | 4               | 1                | -2.27195            |
| 161  | 215748  | Cnksr3        | Cnksr family member 3                                                        | 0               | 4               | 1                | -2.27095            |
| 162  | 233081  | Ffar1         | free fatty acid receptor 1                                                   | 0               | 3               | 2                | -2.27066            |
| 163  | 16001   | Igf1r         | insulin-like growth factor I receptor                                        | 0               | 3               | 2                | -2.26617            |
| 164  | 68032   | Tmem85        | transmembrane protein 85                                                     | 0               | 3               | 1                | -2.26435            |
| 165  | 83679   | Pde4dip       | phosphodiesterase 4D interacting protein (myomegalin)                        | 0               | 3               | 2                | -2.26243            |
| 166  | 56437   | Rrad          | Ras-related associated with diabetes                                         | 0               | 3               | 2                | -2.25982            |
| 167  | 110954  | Rpl10         | ribosomal protein 10                                                         | 0               | 5               | 0                | -2.25727            |
| 168  | 258804  | Olf1240       | olfactory receptor 1240                                                      | 0               | 3               | 2                | -2.25718            |
| 169  | 56642   | Ankrd2        | ankyrin repeat domain 2 (stretch responsive muscle)                          | 0               | 3               | 2                | -2.25582            |
| 170  | 12468   | Cct7          | chaperonin containing Tcp1, subunit 7 (eta)                                  | 0               | 4               | 1                | -2.2548             |
| 171  | 435766  | Tnni3k        | TNNI3 interacting kinase                                                     | 0               | 3               | 7                | -2.25416            |
| 172  | 70127   | Dpf3          | D4, zinc and double PHD fingers, family 3                                    | 0               | 3               | 2                | -2.25361            |
| 173  | 14068   | F7            | coagulation factor VII                                                       | 0               | 4               | 1                | -2.25238            |
| 174  | 98878   | Ehd4          | EH-domain containing 4                                                       | 0               | 3               | 2                | -2.25213            |
| 175  | 22094   | Tshb          | thyroid stimulating hormone, beta subunit                                    | 0               | 3               | 2                | -2.24992            |
| 176  | 93715   | Pcdhga7       | protocadherin gamma subfamily A, 7                                           | 0               | 3               | 2                | -2.24958            |
| 177  | 26961   | Rpl8          | ribosomal protein L8                                                         | 0               | 4               | 1                | -2.24506            |
| 178  | 67684   | 3300001P08Rik | LUC7-like 3 ( <i>S. cerevisiae</i> )                                         | 0               | 3               | 2                | -2.24215            |
| 179  | 93877   | Pcdhb6        | protocadherin beta 6                                                         | 0               | 3               | 2                | -2.24183            |
| 180  | 268395  | Mpg           | N-methylpurine-DNA glycosylase                                               | 0               | 3               | 2                | -2.23964            |
| 181  | 20068   | Rps17         | ribosomal protein S17                                                        | 0               | 5               | 0                | -2.23708            |



Candidates for positive regulators of normal growth (Fisher's)

| Rank | entrez# | Gene Symbol   | Gene name                                               | enriched shRNAs | depleted shRNAs | no change shRNAs | average Fold Change |
|------|---------|---------------|---------------------------------------------------------|-----------------|-----------------|------------------|---------------------|
| 182  | 233115  | Dpy19l3       | dpy-19-like 3 (C. elegans)                              | 0               | 3               | 2                | -2.23695            |
| 183  | 12009   | Azi1          | 5-azacytidine induced gene 1                            | 0               | 3               | 1                | -2.23637            |
| 184  | 433238  | LOC433238     | predicted gene 5518                                     | 0               | 3               | 2                | -2.23486            |
| 185  | 384401  | LOC384401     | tubulin, alpha 1A pseudogene                            | 0               | 3               | 2                | -2.23441            |
| 186  | 240672  | Dusp5         | dual specificity phosphatase 5                          | 0               | 3               | 2                | -2.23371            |
| 187  | 71994   | Cnn3          | calponin 3, acidic                                      | 0               | 3               | 2                | -2.23263            |
| 188  | 11736   | Ankfy1        | ankyrin repeat and FYVE domain containing 1             | 0               | 3               | 2                | -2.23134            |
| 189  | 170936  | Zfp369        | zinc finger protein 369                                 | 0               | 3               | 2                | -2.22976            |
| 190  | 23983   | Pcbp1         | poly(rC) binding protein 1                              | 0               | 3               | 2                | -2.22919            |
| 191  | 12346   | Car1          | carbonic anhydrase 1                                    | 0               | 3               | 2                | -2.22881            |
| 192  | 104112  | Acly          | ATP citrate lyase                                       | 0               | 3               | 2                | -2.22845            |
| 193  | 16630   | Klra12        | killer cell lectin-like receptor subfamily A, member 12 | 0               | 4               | 1                | -2.22823            |
| 194  | 67135   | Z310021H06Rik | BPI fold containing family A, member 5                  | 0               | 3               | 2                | -2.22568            |
| 195  | 270076  | Gcdh          | glutaryl-Coenzyme A dehydrogenase                       | 0               | 3               | 2                | -2.22481            |
| 196  | 67168   | P2ry5         | lysophosphatidic acid receptor 6                        | 0               | 3               | 2                | -2.22426            |
| 197  | 14380   | G6pd2         | glucose-6-phosphate dehydrogenase 2                     | 0               | 3               | 2                | -2.2239             |
| 198  | 503845  | Ear12         | eosinophil-associated, ribonuclease A family, member 12 | 0               | 3               | 1                | -2.22145            |
| 199  | 77592   | A931406H21Rik | RIKEN cDNA 4931406H21 gene                              | 0               | 3               | 1                | -2.21992            |
| 200  | 71854   | Dpep3         | dipeptidase 3                                           | 0               | 3               | 2                | -2.21833            |
| 201  | 12939   | Pcdha7        | protocadherin alpha 7                                   | 0               | 3               | 2                | -2.21821            |
| 202  | 20394   | Scg5          | secretogranin V                                         | 0               | 3               | 2                | -2.21777            |
| 203  | 109226  | A930002I21Rik | RIKEN cDNA A930002I21 gene                              | 0               | 3               | 1                | -2.21702            |
| 204  | 20322   | Sord          | sorbitol dehydrogenase                                  | 0               | 3               | 2                | -2.21419            |
| 205  | 53880   | Birc1g        | NLR family, apoptosis inhibitory protein 7              | 0               | 3               | 2                | -2.21252            |
| 206  | 24061   | Smc1a         | structural maintenance of chromosomes 1A                | 0               | 4               | 1                | -2.21197            |
| 207  | 18673   | Phb           | prohibitin                                              | 0               | 3               | 2                | -2.21035            |
| 208  | 57780   | Fxyd7         | FXDY domain-containing ion transport regulator 7        | 0               | 3               | 2                | -2.20974            |
| 209  | 19981   | Rpl37a        | ribosomal protein L37a                                  | 0               | 4               | 1                | -2.20966            |
| 210  | 107508  | Eprs          | glutamyl-prolyl-tRNA synthetase                         | 0               | 3               | 1                | -2.2095             |
| 211  | 226641  | Atf6          | activating transcription factor 6                       | 0               | 3               | 2                | -2.20708            |
| 212  | 227622  | BC029214      | cDNA sequence BC029214                                  | 0               | 3               | 1                | -2.20667            |
| 213  | 56459   | Uble1a        | SUMO1 activating enzyme subunit 1                       | 0               | 3               | 2                | -2.20549            |
| 214  | 71448   | Tmem80        | transmembrane protein 80                                | 0               | 3               | 2                | -2.20399            |
| 215  | 59010   | Sqrdl         | sulfide quinone reductase-like (yeast)                  | 0               | 3               | 2                | -2.20388            |
| 216  | 19823   | Rnf7          | ring finger protein 7                                   | 0               | 3               | 1                | -2.20359            |
| 217  | 18208   | Ntn1          | netrin 1                                                | 0               | 3               | 2                | -2.2035             |
| 218  | 107047  | Tnfsf5ip1     | proteasome (prosome, macropain) assembly chaperone 2    | 0               | 4               | 0                | -2.19982            |

Candidates for positive regulators of normal growth (Fisher's)

| Rank | entrez# | Gene Symbol   | Gene name                                                                                   | enriched shRNAs | depleted shRNAs | no change shRNAs | average Fold Change |
|------|---------|---------------|---------------------------------------------------------------------------------------------|-----------------|-----------------|------------------|---------------------|
| 219  | 16907   | Lmnb2         | lamin B2                                                                                    | 0               | 3               | 2                | -2.19976            |
| 220  | 113862  | V1rc5         | vomeronasal 1 receptor 13                                                                   | 0               | 4               | 1                | -2.19869            |
| 221  | 20429   | Shox2         | short stature homeobox 2                                                                    | 0               | 3               | 2                | -2.19701            |
| 222  | 216440  | 4632413K17Rik | amplified in osteosarcoma                                                                   | 0               | 3               | 1                | -2.1952             |
| 223  | 73353   | Actrt2        | actin-related protein T2                                                                    | 0               | 4               | 1                | -2.19503            |
| 224  | 113857  | V1rb9         | vomeronasal 1 receptor 41                                                                   | 0               | 3               | 2                | -2.19473            |
| 225  | 67226   | Tmem19        | transmembrane protein 19                                                                    | 0               | 3               | 2                | -2.19442            |
| 226  | 225896  | D19Erd721e    | UBX domain protein 1                                                                        | 0               | 3               | 2                | -2.19378            |
| 227  | 98970   | Fibcd1        | fibrinogen C domain containing 1                                                            | 0               | 5               | 0                | -2.19337            |
| 228  | 71805   | Nup93         | nucleoporin 93                                                                              | 0               | 5               | 0                | -2.19332            |
| 229  | 74589   | 4933428M03Rik | kelch repeat and BTB (POZ) domain containing 12                                             | 0               | 3               | 2                | -2.19252            |
| 230  | 28080   | Atp5o         | ATP synthase, H+ transporting, mitochondrial F1 complex, O subunit                          | 0               | 3               | 2                | -2.19207            |
| 231  | 320183  | Msrb3         | methionine sulfoxide reductase B3                                                           | 0               | 3               | 2                | -2.1918             |
| 232  | 258271  | Olf1311       | olfactory receptor 1311                                                                     | 0               | 3               | 1                | -2.19055            |
| 233  | 240215  | Slc4a9        | solute carrier family 4, sodium bicarbonate cotransporter, member 9                         | 0               | 3               | 2                | -2.18943            |
| 234  | 12500   | Cd3d          | CD3 antigen, delta polypeptide                                                              | 0               | 3               | 2                | -2.18723            |
| 235  | 11517   | Adcyap1r1     | adenylate cyclase activating polypeptide 1 receptor 1                                       | 0               | 3               | 2                | -2.18703            |
| 236  | 240066  | BC066107      | zinc finger protein 870                                                                     | 0               | 3               | 2                | -2.18635            |
| 237  | 17928   | Myog          | myogenin                                                                                    | 0               | 3               | 2                | -2.18583            |
| 238  | 215387  | Brn1          | non-SMC condensin I complex, subunit H                                                      | 0               | 3               | 2                | -2.18361            |
| 239  | 258927  | Olf481        | olfactory receptor 481                                                                      | 0               | 4               | 1                | -2.18338            |
| 240  | 74245   | Ctbs          | chitinase, di-N-acetyl-                                                                     | 0               | 3               | 1                | -2.18336            |
| 241  | 68479   | Phf5a         | PHD finger protein 5A                                                                       | 0               | 4               | 1                | -2.1833             |
| 242  | 74441   | Slco6c1       | solute carrier organic anion transporter family, member 6c1                                 | 0               | 3               | 2                | -2.18113            |
| 243  | 69520   | 2310002A05Rik | late cornified envelope 3F                                                                  | 0               | 3               | 1                | -2.18058            |
| 244  | 170735  | Arr3          | arrestin 3, retinal                                                                         | 0               | 3               | 1                | -2.18029            |
| 245  | 19277   | Ptpro         | protein tyrosine phosphatase, receptor type, O                                              | 0               | 3               | 2                | -2.1769             |
| 246  | 217344  | Rhbdf2        | rhomoid 5 homolog 2 (Drosophila)                                                            | 0               | 3               | 2                | -2.17643            |
| 247  | 69790   | Thrap6        | mediator complex subunit 30                                                                 | 0               | 3               | 2                | -2.17596            |
| 248  | 22627   | Ywhae         | tyrosine 3-monooxygenase/tryptophan 5-monooxygenase activation protein, epsilon polypeptide | 0               | 5               | 0                | -2.17446            |
| 249  | 244141  | Nars2         | asparaginyl-tRNA synthetase 2 (mitochondrial)(putative)                                     | 0               | 3               | 2                | -2.17316            |
| 250  | 15013   | H2-Q2         | histocompatibility 2, Q region locus 2                                                      | 0               | 4               | 1                | -2.17308            |
| 251  | 13038   | Ctsk          | cathepsin K                                                                                 | 0               | 3               | 7                | -2.17041            |
| 252  | 12335   | Capn3         | calpain 3                                                                                   | 0               | 3               | 2                | -2.17022            |
| 253  | 319229  | Sctr          | secretin receptor                                                                           | 0               | 3               | 2                | -2.17005            |
| 254  | 66055   | 0610009D07Rik | RIKEN cDNA 0610009D07 gene                                                                  | 0               | 4               | 1                | -2.16984            |
| 255  | 75905   | 4930578C19Rik | RIKEN cDNA 4930578C19 gene                                                                  | 0               | 3               | 1                | -2.16804            |

Candidates for positive regulators of normal growth (Fisher's)

| Rank | entrez# | Gene Symbol   | Gene name                                                                  | enriched shRNAs | depleted shRNAs | no change shRNAs | average Fold Change |
|------|---------|---------------|----------------------------------------------------------------------------|-----------------|-----------------|------------------|---------------------|
| 256  | 103583  | Fbxw11        | F-box and WD-40 domain protein 11                                          | 0               | 3               | 2                | -2.16775            |
| 257  | 56443   | Arpc1a        | actin related protein 2/3 complex, subunit 1A                              | 0               | 3               | 2                | -2.1671             |
| 258  | 57438   |               | 39147 membrane-associated ring finger (C3HC4) 7                            | 0               | 3               | 2                | -2.16671            |
| 259  | 72723   | Zfp74         | zinc finger protein 74                                                     | 0               | 3               | 2                | -2.16579            |
| 260  | 13350   | Dgat1         | diacylglycerol O-acyltransferase 1                                         | 0               | 3               | 2                | -2.1649             |
| 261  | 192986  | Cyb5d2        | cytochrome b5 domain containing 2                                          | 0               | 3               | 2                | -2.16273            |
| 262  | 53319   | Nxf1          | nuclear RNA export factor 1 homolog (S. cerevisiae)                        | 0               | 3               | 2                | -2.16218            |
| 263  | 20909   | Stx4a         | syntaxin 4A (placental)                                                    | 0               | 3               | 2                | -2.16087            |
| 264  | 114674  | Gtf2ird2      | GTF2I repeat domain containing 2                                           | 0               | 3               | 2                | -2.15998            |
| 265  | 12455   | Ccnt1         | cyclin T1                                                                  | 0               | 3               | 2                | -2.15825            |
| 266  | 11606   | Agt           | angiotensinogen (serpin peptidase inhibitor, clade A, member 8)            | 0               | 3               | 2                | -2.15682            |
| 267  | 245000  | Atr           | ataxia telangiectasia and Rad3 related                                     | 0               | 4               | 1                | -2.15637            |
| 268  | 267019  | Rps15a        | ribosomal protein S15A                                                     | 0               | 4               | 1                | -2.15488            |
| 269  | 66380   | Krtap3-3      | keratin associated protein 3-3                                             | 0               | 3               | 1                | -2.1534             |
| 270  | 23879   | Fxr2h         | fragile X mental retardation, autosomal homolog 2                          | 0               | 3               | 1                | -2.15269            |
| 271  | 18033   | Nfkb1         | nuclear factor of kappa light polypeptide gene enhancer in B cells 1, p105 | 0               | 3               | 2                | -2.15266            |
| 272  | 21343   | Taf6          | TAF6 RNA polymerase II, TATA box binding protein (TBP)-associated factor   | 0               | 3               | 2                | -2.15157            |
| 273  | 77128   | A930001N09Rik | RIKEN cDNA A930001N09 gene                                                 | 0               | 3               | 2                | -2.14935            |
| 274  | 104303  | Arl1          | ADP-ribosylation factor-like 1                                             | 0               | 3               | 2                | -2.14604            |
| 275  | 19989   | Rpl7          | ribosomal protein L7                                                       | 0               | 4               | 1                | -2.14401            |
| 276  | 269997  | 6430604K15Rik | zinc finger protein 747                                                    | 0               | 3               | 2                | -2.14252            |
| 277  | 22761   | Zfpm1         | zinc finger protein, multitype 1                                           | 0               | 3               | 2                | -2.14243            |
| 278  | 433336  | UNK           | NA                                                                         | 0               | 3               | 2                | -2.14149            |
| 279  | 66537   | 2510048O06Rik | proteasome maturation protein                                              | 0               | 4               | 1                | -2.13865            |
| 280  | 258468  | Olf1r1254     | olfactory receptor 1254                                                    | 0               | 3               | 2                | -2.13842            |
| 281  | 14708   | Gng7          | guanine nucleotide binding protein (G protein), gamma 7                    | 0               | 4               | 0                | -2.13462            |
| 282  | 380855  | Rsl1          | regulator of sex limited protein 1                                         | 0               | 3               | 2                | -2.13393            |
| 283  | 224045  | Eif2b5        | eukaryotic translation initiation factor 2B, subunit 5 epsilon             | 0               | 3               | 2                | -2.13386            |
| 284  | 17156   | Man1a2        | mannosidase, alpha, class 1A, member 2                                     | 0               | 3               | 2                | -2.13379            |
| 285  | 233877  | Kctd13        | potassium channel tetramerisation domain containing 13                     | 0               | 3               | 2                | -2.13314            |
| 286  | 20913   | Stxbp4        | syntaxin binding protein 4                                                 | 0               | 3               | 2                | -2.13185            |
| 287  | 19231   | Ptma          | prothymosin alpha                                                          | 0               | 3               | 2                | -2.13139            |
| 288  | 66747   | 4933400A11Rik | capping protein (actin filament) muscle Z-line, alpha 1 pseudogene         | 0               | 3               | 2                | -2.12953            |
| 289  | 64450   | Gpr85         | G protein-coupled receptor 85                                              | 0               | 3               | 2                | -2.12718            |
| 290  | 12425   | Cckar         | cholecystokinin A receptor                                                 | 0               | 3               | 1                | -2.12683            |
| 291  | 69982   | Spink2        | serine peptidase inhibitor, Kazal type 2                                   | 0               | 3               | 2                | -2.12618            |
| 292  | 27362   | Dnajb9        | DnaJ (Hsp40) homolog, subfamily B, member 9                                | 0               | 3               | 2                | -2.12601            |

Candidates for positive regulators of normal growth (Fisher's)

| Rank | entrez# | Gene Symbol   | Gene name                                                               | enriched shRNAs | depleted shRNAs | no change shRNAs | average Fold Change |
|------|---------|---------------|-------------------------------------------------------------------------|-----------------|-----------------|------------------|---------------------|
| 293  | 208643  | Eif4g1        | eukaryotic translation initiation factor 4, gamma 1                     | 0               | 4               | 1                | -2.12567            |
| 294  | 66845   | Mrpl33        | mitochondrial ribosomal protein L33                                     | 0               | 3               | 2                | -2.12462            |
| 295  | 278097  | Armxc6        | armadillo repeat containing, X-linked 6                                 | 0               | 3               | 2                | -2.12214            |
| 296  | 17713   | Grpel1        | GrpE-like 1, mitochondrial                                              | 0               | 4               | 1                | -2.1214             |
| 297  | 102193  | Zdhhc7        | zinc finger, DHHC domain containing 7                                   | 0               | 3               | 2                | -2.11942            |
| 298  | 381511  | Ppm2c         | pyruvate dehydrogenase phosphatase catalytic subunit 1                  | 0               | 3               | 2                | -2.11936            |
| 299  | 74653   | 4930444A02Rik | RIKEN cDNA 4930444A02 gene                                              | 0               | 3               | 2                | -2.11917            |
| 300  | 67186   | Rplp2         | ribosomal protein, large P2                                             | 0               | 5               | 0                | -2.11818            |
| 301  | 240289  | LOC240289     | proteasome (prosome, macropain) subunit, beta type 3 pseudogene         | 0               | 3               | 2                | -2.11811            |
| 302  | 432986  | Kb16p         | type II keratin Kb16P                                                   | 0               | 4               | 1                | -2.11805            |
| 303  | 170729  | Scr1          | scratch homolog 1, zinc finger protein (Drosophila)                     | 0               | 4               | 1                | -2.1178             |
| 304  | 93765   | Ube2n         | ubiquitin-conjugating enzyme E2N                                        | 0               | 3               | 2                | -2.11712            |
| 305  | 319210  | 4930518C23Rik | vomeronasal 2, receptor, pseudogene 11                                  | 0               | 4               | 1                | -2.11639            |
| 306  | 20044   | Rps14         | ribosomal protein S14                                                   | 0               | 5               | 0                | -2.11479            |
| 307  | 20826   | Nhp21         | NHP2 non-histone chromosome protein 2-like 1 (S. cerevisiae)            | 0               | 4               | 1                | -2.11314            |
| 308  | 12442   | Ccnb2         | cyclin B2                                                               | 0               | 3               | 2                | -2.11248            |
| 309  | 20020   | Polr2a        | polymerase (RNA) II (DNA directed) polypeptide A                        | 0               | 3               | 2                | -2.11212            |
| 310  | 17130   | Smad6         | MAD homolog 6 (Drosophila)                                              | 0               | 4               | 1                | -2.11156            |
| 311  | 15260   | Hira          | histone cell cycle regulation defective homolog A (S. cerevisiae)       | 0               | 4               | 1                | -2.11152            |
| 312  | 54127   | Rps28         | ribosomal protein S28                                                   | 0               | 4               | 1                | -2.10713            |
| 313  | 57808   | Rpl35a        | ribosomal protein L35A                                                  | 0               | 3               | 1                | -2.10587            |
| 314  | 93691   | Klf7          | Kruppel-like factor 7 (ubiquitous)                                      | 0               | 3               | 2                | -2.10586            |
| 315  | 12545   | Cdc7          | cell division cycle 7 (S. cerevisiae)                                   | 0               | 3               | 2                | -2.10448            |
| 316  | 171258  | V1ri7         | vomeronasal 1 receptor 202                                              | 0               | 4               | 1                | -2.10387            |
| 317  | 319195  | Rpl17         | ribosomal protein L17                                                   | 0               | 3               | 2                | -2.10383            |
| 318  | 14787   | Rhpn1         | rhophilin, Rho GTPase binding protein 1                                 | 0               | 3               | 2                | -2.10363            |
| 319  | 21681   | Thoc4         | Aly/REF export factor                                                   | 0               | 4               | 0                | -2.10285            |
| 320  | 493809  | Taar3         | trace amine-associated receptor 3                                       | 0               | 4               | 1                | -2.10055            |
| 321  | 20479   | Vps4b         | vacuolar protein sorting 4b (yeast)                                     | 0               | 3               | 2                | -2.1004             |
| 322  | 69836   | Pla2g12b      | phospholipase A2, group XIIB                                            | 0               | 3               | 2                | -2.09955            |
| 323  | 433285  | UNK           | NA                                                                      | 0               | 3               | 2                | -2.0995             |
| 324  | 54711   | Plagl2        | pleiomorphic adenoma gene-like 2                                        | 0               | 3               | 2                | -2.09809            |
| 325  | 230676  | BC059842      | seizure threshold 2                                                     | 0               | 3               | 1                | -2.09757            |
| 326  | 386042  | LOC386042     | NA                                                                      | 0               | 3               | 2                | -2.09751            |
| 327  | 238384  | Slc24a4       | solute carrier family 24 (sodium/potassium/calcium exchanger), member 4 | 0               | 3               | 2                | -2.09713            |
| 328  | 223732  | Ldoc1         | leucine zipper, down-regulated in cancer 1-like                         | 0               | 3               | 1                | -2.09609            |
| 329  | 381806  | LOC381806     | murinoglobulin pseudogene                                               | 0               | 3               | 2                | -2.09556            |

Candidates for positive regulators of normal growth (Fisher's)

| Rank | entrez# | Gene Symbol   | Gene name                                                                               | enriched shRNAs | depleted shRNAs | no change shRNAs | average Fold Change |
|------|---------|---------------|-----------------------------------------------------------------------------------------|-----------------|-----------------|------------------|---------------------|
| 330  | 20005   | Rpl9          | ribosomal protein L9                                                                    | 0               | 4               | 1                | -2.09094            |
| 331  | 18771   | Pknox1        | Pbx/knotted 1 homeobox                                                                  | 0               | 4               | 1                | -2.09049            |
| 332  | 14738   | Gpr12         | G-protein coupled receptor 12                                                           | 0               | 3               | 7                | -2.09006            |
| 333  | 11595   | Agc1          | aggrecan                                                                                | 0               | 3               | 2                | -2.08825            |
| 334  | 227699  | Nup188        | nucleoporin 188                                                                         | 0               | 3               | 1                | -2.08514            |
| 335  | 52563   | Cdc23         | CDC23 (cell division cycle 23, yeast, homolog)                                          | 0               | 3               | 2                | -2.08474            |
| 336  | 620654  | UNK           | NA                                                                                      | 0               | 4               | 1                | -2.08377            |
| 337  | 26445   | Psemb2        | proteasome (prosome, macropain) subunit, beta type 2                                    | 0               | 5               | 0                | -2.08213            |
| 338  | 76897   | 0710005M24Rik | RALY RNA binding protein-like                                                           | 0               | 3               | 2                | -2.08114            |
| 339  | 278304  | A930006D11Rik | zinc finger protein 385C                                                                | 0               | 3               | 2                | -2.0809             |
| 340  | 22629   | Ywhah         | tyrosine 3-monooxygenase/tryptophan 5-monooxygenase activation protein, eta polypeptide | 0               | 3               | 2                | -2.07963            |
| 341  | 21689   | Tekt1         | tektin 1                                                                                | 0               | 4               | 1                | -2.07948            |
| 342  | 16783   | Lamp1         | lysosomal-associated membrane protein 1                                                 | 0               | 4               | 1                | -2.07824            |
| 343  | 69077   | Psmc11        | proteasome (prosome, macropain) 26S subunit, non-ATPase, 11                             | 0               | 3               | 2                | -2.07794            |
| 344  | 71889   | Epn3          | epsin 3                                                                                 | 0               | 3               | 2                | -2.07792            |
| 345  | 238323  | Rps6kl1       | ribosomal protein S6 kinase-like 1                                                      | 0               | 3               | 2                | -2.0778             |
| 346  | 216760  | Mfap3         | microfibrillar-associated protein 3                                                     | 0               | 4               | 1                | -2.07721            |
| 347  | 241134  | 9430031J16Rik | RIKEN cDNA 9430031J16 gene                                                              | 0               | 4               | 1                | -2.07305            |
| 348  | 208666  | Diras1        | DIRAS family, GTP-binding RAS-like 1                                                    | 0               | 4               | 1                | -2.07182            |
| 349  | 57748   | Jmy           | junction-mediating and regulatory protein                                               | 0               | 3               | 1                | -2.07013            |
| 350  | 11546   | Parp2         | poly (ADP-ribose) polymerase family, member 2                                           | 0               | 3               | 2                | -2.06954            |
| 351  | 15891   | Ibsp          | integrin binding sialoprotein                                                           | 0               | 3               | 2                | -2.06754            |
| 352  | 269397  | Ss18l1        | synovial sarcoma translocation gene on chromosome 18-like 1                             | 0               | 3               | 2                | -2.06742            |
| 353  | 20201   | S100a8        | S100 calcium binding protein A8 (calgranulin A)                                         | 0               | 3               | 2                | -2.06682            |
| 354  | 192164  | Pcdha12       | protocadherin alpha 12                                                                  | 0               | 3               | 2                | -2.06645            |
| 355  | 106200  | Txndc11       | thioredoxin domain containing 11                                                        | 0               | 3               | 2                | -2.06617            |
| 356  | 384639  | LOC384639     | tetraspanin 7 pseudogene                                                                | 0               | 4               | 1                | -2.06557            |
| 357  | 19941   | Rpl26         | ribosomal protein L26                                                                   | 0               | 3               | 2                | -2.06472            |
| 358  | 209318  | Gps1          | G protein pathway suppressor 1                                                          | 0               | 4               | 1                | -2.06467            |
| 359  | 231889  | Bud31         | BUD31 homolog (yeast)                                                                   | 0               | 3               | 2                | -2.06248            |
| 360  | 67701   | Wfdc2         | WAP four-disulfide core domain 2                                                        | 0               | 3               | 2                | -2.06217            |
| 361  | 545013  | LOC545013     | predicted gene 5797                                                                     | 0               | 3               | 2                | -2.06182            |
| 362  | 78908   | Igsf3         | immunoglobulin superfamily, member 3                                                    | 0               | 4               | 1                | -2.06155            |
| 363  | 56417   | Adar          | adenosine deaminase, RNA-specific                                                       | 0               | 3               | 2                | -2.05765            |
| 364  | 71838   | Phf7          | PHD finger protein 7                                                                    | 0               | 3               | 2                | -2.05689            |
| 365  | 18548   | Pcsk1         | proprotein convertase subtilisin/kexin type 1                                           | 0               | 4               | 1                | -2.05677            |
| 366  | 384361  | UNK           | NA                                                                                      | 0               | 4               | 0                | -2.05643            |

Candidates for positive regulators of normal growth (Fisher's)

| Rank | entrez# | Gene Symbol   | Gene name                                                                       | enriched shRNAs | depleted shRNAs | no change shRNAs | average Fold Change |
|------|---------|---------------|---------------------------------------------------------------------------------|-----------------|-----------------|------------------|---------------------|
| 367  | 109331  | Rnf20         | ring finger protein 20                                                          | 0               | 3               | 2                | -2.0547             |
| 368  | 207350  | Itih5l        | NA                                                                              | 0               | 4               | 1                | -2.05427            |
| 369  | 56018   | Stard10       | START domain containing 10                                                      | 0               | 4               | 1                | -2.05422            |
| 370  | 56388   | Cyp3a25       | cytochrome P450, family 3, subfamily a, polypeptide 25                          | 0               | 3               | 2                | -2.05392            |
| 371  | 56455   | Dynll1        | dynein light chain LC8-type 1                                                   | 0               | 3               | 2                | -2.05363            |
| 372  | 64435   | Fcamr         | Fc receptor, IgA, IgM, high affinity                                            | 0               | 3               | 2                | -2.05359            |
| 373  | 71382   | Pex1          | peroxisomal biogenesis factor 1                                                 | 0               | 3               | 2                | -2.05236            |
| 374  | 67661   | Ift172        | intraflagellar transport 172 homolog (Chlamydomonas)                            | 0               | 4               | 1                | -2.05137            |
| 375  | 12396   | Cbfa2t2h      | core-binding factor, runt domain, alpha subunit 2, translocated to, 2 (human)   | 0               | 3               | 2                | -2.05117            |
| 376  | 75764   | Giyd2         | SLX1 structure-specific endonuclease subunit homolog B ( <i>S. cerevisiae</i> ) | 0               | 4               | 1                | -2.05113            |
| 377  | 59125   | Nek7          | NIMA (never in mitosis gene a)-related expressed kinase 7                       | 0               | 3               | 2                | -2.05059            |
| 378  | 14719   | Got2          | glutamate oxaloacetate transaminase 2, mitochondrial                            | 0               | 3               | 2                | -2.04876            |
| 379  | 67220   | Plekho1       | pleckstrin homology domain containing, family O member 1                        | 0               | 4               | 1                | -2.04774            |
| 380  | 243659  | Styk1         | serine/threonine/tyrosine kinase 1                                              | 0               | 3               | 2                | -2.04729            |
| 381  | 270035  | D030041N04Rik | leucine zipper-EF-hand containing transmembrane protein 2                       | 0               | 4               | 1                | -2.04633            |
| 382  | 20807   | Srf           | serum response factor                                                           | 0               | 3               | 2                | -2.04543            |
| 383  | 64136   | Sdf2l1        | stromal cell-derived factor 2-like 1                                            | 0               | 3               | 2                | -2.04478            |
| 384  | 22139   | Ttr           | transthyretin                                                                   | 0               | 4               | 1                | -2.04427            |
| 385  | 18999   | Pou5f1        | POU domain, class 5, transcription factor 1                                     | 0               | 3               | 2                | -2.04226            |
| 386  | 17069   | Ly6e          | lymphocyte antigen 6 complex, locus E                                           | 0               | 3               | 2                | -2.03793            |
| 387  | 218921  | 4930474N05Rik | RIKEN cDNA 4930474N05 gene                                                      | 0               | 3               | 2                | -2.03682            |
| 388  | 246103  | Atxn7         | ataxin 7                                                                        | 0               | 4               | 1                | -2.03654            |
| 389  | 18632   | Pex11b        | peroxisomal biogenesis factor 11 beta                                           | 0               | 3               | 2                | -2.03555            |
| 390  | 16159   | Il12a         | interleukin 12a                                                                 | 0               | 3               | 2                | -2.03441            |
| 391  | 104130  | Ndufb11       | NADH dehydrogenase (ubiquinone) 1 beta subcomplex, 11                           | 0               | 3               | 2                | -2.03401            |
| 392  | 66257   | Nicn1         | nicolin 1                                                                       | 0               | 3               | 1                | -2.03386            |
| 393  | 241915  | Phc3          | polyhomeotic-like 3 ( <i>Drosophila</i> )                                       | 0               | 3               | 2                | -2.03301            |
| 394  | 541307  | Ccl26l        | chemokine (C-C motif) ligand 26                                                 | 0               | 3               | 2                | -2.03292            |
| 395  | 19726   | Rfx3          | regulatory factor X, 3 (influences HLA class II expression)                     | 0               | 3               | 2                | -2.03097            |
| 396  | 97440   | C76566        | UDP-GlcNAc:betaGal beta-1,3-N-acetylglucosaminyltransferase 9, pseudogene       | 0               | 4               | 1                | -2.03084            |
| 397  | 12461   | Cct2          | chaperonin containing Tcp1, subunit 2 (beta)                                    | 0               | 3               | 2                | -2.02905            |
| 398  | 16401   | Itga4         | integrin alpha 4                                                                | 0               | 5               | 0                | -2.02885            |
| 399  | 69354   | Slc38a4       | solute carrier family 38, member 4                                              | 0               | 4               | 1                | -2.02735            |
| 400  | 192194  | Butr1         | butyrophilin related 1                                                          | 0               | 3               | 1                | -2.02709            |
| 401  | 216136  | Ilvbl         | ilvB (bacterial acetolactate synthase)-like                                     | 0               | 3               | 2                | -2.02688            |
| 402  | 435391  | LOC435391     | dual specificity phosphatase and pro isomerase domain containing 1              | 0               | 3               | 2                | -2.02688            |
| 403  | 71819   | Kif23         | kinesin family member 23                                                        | 0               | 4               | 1                | -2.02588            |

Candidates for positive regulators of normal growth (Fisher's)

| Rank | entrez# | Gene Symbol   | Gene name                                                          | enriched shRNAs | depleted shRNAs | no change shRNAs | average Fold Change |
|------|---------|---------------|--------------------------------------------------------------------|-----------------|-----------------|------------------|---------------------|
| 404  | 13716   | Ell           | elongation factor RNA polymerase II                                | 0               | 3               | 2                | -2.02491            |
| 405  | 14609   | Gja1          | gap junction protein, alpha 1                                      | 0               | 4               | 1                | -2.02476            |
| 406  | 67774   | Loh12cr1      | loss of heterozygosity, 12, chromosomal region 1 homolog (human)   | 0               | 3               | 2                | -2.02448            |
| 407  | 78070   | Cpt1c         | carnitine palmitoyltransferase 1c                                  | 0               | 5               | 0                | -2.0221             |
| 408  | 54624   | Paf1          | Paf1, RNA polymerase II associated factor, homolog (S. cerevisiae) | 0               | 4               | 1                | -2.02172            |
| 409  | 170736  | Parvb         | parvin, beta                                                       | 0               | 3               | 2                | -2.02136            |
| 410  | 252870  | Usp7          | ubiquitin specific peptidase 7                                     | 0               | 4               | 1                | -2.02041            |
| 411  | 21813   | Tgfb2         | transforming growth factor, beta receptor II                       | 0               | 4               | 1                | -2.01874            |
| 412  | 170737  | Znrf1         | zinc and ring finger 1                                             | 0               | 3               | 2                | -2.01857            |
| 413  | 67698   | Tmem157       | family with sequence similarity 174, member A                      | 0               | 4               | 1                | -2.01761            |
| 414  | 319513  | A930025D01Rik | family with sequence similarity 113, member A                      | 0               | 3               | 1                | -2.01755            |
| 415  | 24131   | Ldb3          | LIM domain binding 3                                               | 0               | 3               | 2                | -2.0146             |
| 416  | 383101  | UNK           | NA                                                                 | 0               | 5               | 0                | -2.01428            |
| 417  | 78294   | Rps27a        | ribosomal protein S27A                                             | 0               | 4               | 1                | -2.01403            |
| 418  | 108687  | Edem2         | ER degradation enhancer, mannosidase alpha-like 2                  | 0               | 3               | 2                | -2.01397            |
| 419  | 214931  | Fbxl16        | F-box and leucine-rich repeat protein 16                           | 0               | 3               | 2                | -2.01341            |
| 420  | 66492   | Zmat2         | zinc finger, matrin type 2                                         | 0               | 4               | 1                | -2.01258            |
| 421  | 68816   | Ppil1         | peptidylprolyl isomerase (cyclophilin)-like 1                      | 0               | 3               | 2                | -2.01223            |
| 422  | 353283  | Eras          | ES cell-expressed Ras                                              | 0               | 3               | 2                | -2.01099            |
| 423  | 67344   | Tctex1d1      | Tctex1 domain containing 1                                         | 0               | 3               | 1                | -2.01092            |
| 424  | 83701   | Ars2          | serrate RNA effector molecule homolog (Arabidopsis)                | 0               | 4               | 1                | -2.01071            |
| 425  | 213311  | Fbxl21        | F-box and leucine-rich repeat protein 21                           | 0               | 3               | 2                | -2.01067            |
| 426  | 243382  | Ppm1k         | protein phosphatase 1K (PP2C domain containing)                    | 0               | 4               | 1                | -2.00921            |
| 427  | 18012   | Neurod1       | neurogenic differentiation 1                                       | 0               | 3               | 2                | -2.00836            |
| 428  | 171189  | V1rc16        | vomer nasal 1 receptor 17                                          | 0               | 5               | 0                | -2.00833            |
| 429  | 268470  | Ube2z         | ubiquitin-conjugating enzyme E2Z (putative)                        | 0               | 3               | 2                | -2.00825            |
| 430  | 14705   | Bscl2         | Bernardinelli-Seip congenital lipodystrophy 2 homolog (human)      | 0               | 4               | 1                | -2.00661            |
| 431  | 22598   | Slc6a18       | solute carrier family 6 (neurotransmitter transporter), member 18  | 0               | 4               | 1                | -2.00638            |
| 432  | 27979   | Eif3s9        | eukaryotic translation initiation factor 3, subunit B              | 0               | 4               | 1                | -2.00532            |
| 433  | 227506  | LOC227506     | leukotriene A4 hydrolase pseudogene                                | 0               | 3               | 2                | -2.00524            |
| 434  | 117005  | Olf74         | olfactory receptor 74                                              | 0               | 3               | 1                | -2.00518            |
| 435  | 19671   | Rce1          | RCE1 homolog, prenyl protein peptidase (S. cerevisiae)             | 0               | 4               | 1                | -2.00482            |
| 436  | 100678  | PspH          | phosphoserine phosphatase                                          | 0               | 3               | 2                | -2.00354            |
| 437  | 109161  | Ube2q2        | ubiquitin-conjugating enzyme E2Q (putative) 2                      | 0               | 3               | 2                | -2.00235            |
| 438  | 20623   | Snrk          | SNF related kinase                                                 | 0               | 3               | 2                | -2.00234            |
| 439  | 20378   | Frzb          | frizzled-related protein                                           | 0               | 3               | 2                | -2.0021             |
| 440  | 19353   | Rac1          | RAS-related C3 botulinum substrate 1                               | 0               | 4               | 1                | -2.00204            |

Candidates for positive regulators of normal growth (Fisher's)

| Rank | entrez# | Gene Symbol   | Gene name                                                                      | enriched shRNAs | depleted shRNAs | no change shRNAs | average Fold Change |
|------|---------|---------------|--------------------------------------------------------------------------------|-----------------|-----------------|------------------|---------------------|
| 441  | 66421   | 2410004B18Rik | RIKEN cDNA 2410004B18 gene                                                     | 0               | 3               | 1                | -2.00199            |
| 442  | 72194   | Fbxl20        | F-box and leucine-rich repeat protein 20                                       | 0               | 3               | 2                | -2.00144            |
| 443  | 66887   | 1300002A08Rik | lon peptidase 2, peroxisomal                                                   | 0               | 3               | 2                | -2.00084            |
| 444  | 329333  | B230218O03    | NA                                                                             | 0               | 3               | 2                | -2.00034            |
| 445  | 67877   | Nat5          | N(alpha)-acetyltransferase 20, NatB catalytic subunit                          | 0               | 3               | 2                | -1.99948            |
| 446  | 319322  | Sf3b2         | splicing factor 3b, subunit 2                                                  | 0               | 5               | 0                | -1.99925            |
| 447  | 13684   | Eif4e         | eukaryotic translation initiation factor 4E                                    | 0               | 3               | 2                | -1.99922            |
| 448  | 67236   | 2810452K22Rik | cyclin-dependent kinase 2 interacting protein                                  | 0               | 4               | 1                | -1.99887            |
| 449  | 56429   | Dpt           | dermatopontin                                                                  | 0               | 3               | 2                | -1.99847            |
| 450  | 24099   | Tnfsf13b      | tumor necrosis factor (ligand) superfamily, member 13b                         | 0               | 3               | 2                | -1.9979             |
| 451  | 94254   | Wbscr16       | Williams-Beuren syndrome chromosome region 16 homolog (human)                  | 0               | 3               | 2                | -1.99775            |
| 452  | 26893   | Cops6         | COP9 (constitutive photomorphogenic) homolog, subunit 6 (Arabidopsis thaliana) | 0               | 3               | 2                | -1.99656            |
| 453  | 66665   | 5730528L13Rik | RIKEN cDNA 5730528L13 gene                                                     | 0               | 4               | 1                | -1.99611            |
| 454  | 73407   | 1700055M20Rik | testis, prostate and placenta expressed                                        | 0               | 3               | 1                | -1.99569            |
| 455  | 14784   | Grb2          | growth factor receptor bound protein 2                                         | 0               | 3               | 2                | -1.99546            |
| 456  | 353234  | Pcdha2        | protocadherin alpha 2                                                          | 0               | 3               | 2                | -1.99326            |
| 457  | 71963   | Cdca4         | cell division cycle associated 4                                               | 0               | 3               | 1                | -1.99274            |
| 458  | 108800  | Ston2         | stonin 2                                                                       | 0               | 3               | 2                | -1.99267            |
| 459  | 101023  | Zfp513        | zinc finger protein 513                                                        | 0               | 5               | 0                | -1.99226            |
| 460  | 64424   | Polr1e        | polymerase (RNA) I polypeptide E                                               | 0               | 3               | 2                | -1.99174            |
| 461  | 13669   | Eif3s10       | eukaryotic translation initiation factor 3, subunit A                          | 0               | 5               | 0                | -1.99088            |
| 462  | 54217   | Rpl36         | ribosomal protein L36                                                          | 0               | 4               | 1                | -1.98968            |
| 463  | 59013   | Hnrph1        | heterogeneous nuclear ribonucleoprotein H1                                     | 0               | 3               | 2                | -1.98964            |
| 464  | 12048   | Bcl2l1        | BCL2-like 1                                                                    | 0               | 3               | 2                | -1.98887            |
| 465  | 14457   | Gas7          | growth arrest specific 7                                                       | 0               | 3               | 2                | -1.98808            |
| 466  | 70575   | Gfod2         | glucose-fructose oxidoreductase domain containing 2                            | 0               | 4               | 1                | -1.9875             |
| 467  | 14038   | Expi          | extracellular proteinase inhibitor                                             | 0               | 3               | 2                | -1.98667            |
| 468  | 258366  | Olf434        | olfactory receptor 434                                                         | 0               | 3               | 2                | -1.98505            |
| 469  | 13733   | Emr1          | EGF-like module containing, mucin-like, hormone receptor-like sequence 1       | 0               | 3               | 2                | -1.98472            |
| 470  | 94043   | Tm2d1         | TM2 domain containing 1                                                        | 0               | 3               | 2                | -1.98354            |
| 471  | 170733  | Klra17        | killer cell lectin-like receptor, subfamily A, member 17                       | 0               | 3               | 2                | -1.9826             |
| 472  | 66395   | Ahnak         | AHNAK nucleoprotein (desmoyokin)                                               | 0               | 3               | 2                | -1.98258            |
| 473  | 20499   | Slc12a7       | solute carrier family 12, member 7                                             | 0               | 3               | 2                | -1.98204            |
| 474  | 73626   | 1810009J06Rik | RIKEN cDNA 1810009J06 gene                                                     | 0               | 3               | 2                | -1.98192            |
| 475  | 233187  | Lim2          | lens intrinsic membrane protein 2                                              | 0               | 4               | 1                | -1.98095            |
| 476  | 68468   | Ly6g6c        | lymphocyte antigen 6 complex, locus G6C                                        | 0               | 3               | 1                | -1.98026            |
| 477  | 245866  | lft52         | intraflagellar transport 52 homolog (Chlamydomonas)                            | 0               | 5               | 0                | -1.98011            |



Candidates for positive regulators of normal growth (Fisher's)

| Rank | entrez# | Gene Symbol   | Gene name                                                                          | enriched shRNAs | depleted shRNAs | no change shRNAs | average Fold Change |
|------|---------|---------------|------------------------------------------------------------------------------------|-----------------|-----------------|------------------|---------------------|
| 478  | 104156  | Etv5          | ets variant gene 5                                                                 | 0               | 3               | 2                | -1.97886            |
| 479  | 75288   | Slc35f4       | solute carrier family 35, member F4                                                | 0               | 3               | 2                | -1.97806            |
| 480  | 109552  | Sri           | sorcin                                                                             | 0               | 4               | 1                | -1.97795            |
| 481  | 80859   | Nfkbiz        | nuclear factor of kappa light polypeptide gene enhancer in B cells inhibitor, zeta | 0               | 4               | 1                | -1.97735            |
| 482  | 214254  | Nudt15        | nudix (nucleoside diphosphate linked moiety X)-type motif 15                       | 0               | 3               | 1                | -1.97713            |
| 483  | 245074  | UNK           | NA                                                                                 | 0               | 3               | 2                | -1.97706            |
| 484  | 21762   | Psmc2         | proteasome (prosome, macropain) 26S subunit, non-ATPase, 2                         | 0               | 3               | 2                | -1.9769             |
| 485  | 50755   | Fbxo18        | F-box protein 18                                                                   | 0               | 4               | 1                | -1.97664            |
| 486  | 71446   | Wrb           | tryptophan rich basic protein                                                      | 0               | 4               | 1                | -1.97652            |
| 487  | 11861   | Arl4a         | ADP-ribosylation factor-like 4A                                                    | 0               | 3               | 2                | -1.97626            |
| 488  | 66469   | 2810405K02Rik | RIKEN cDNA 2810405K02 gene                                                         | 0               | 4               | 1                | -1.97569            |
| 489  | 74365   | Lonrf3        | LON peptidase N-terminal domain and ring finger 3                                  | 0               | 3               | 2                | -1.97499            |
| 490  | 114895  | UNK           | NA                                                                                 | 0               | 4               | 1                | -1.97388            |
| 491  | 17454   | Mov10         | Moloney leukemia virus 10                                                          | 0               | 3               | 2                | -1.97266            |
| 492  | 329302  | UNK           | NA                                                                                 | 0               | 4               | 1                | -1.97062            |
| 493  | 435946  | LOC435946     | predicted gene 5726                                                                | 0               | 3               | 2                | -1.9702             |
| 494  | 277010  | Marveld1      | MARVEL (membrane-associating) domain containing 1                                  | 0               | 3               | 2                | -1.96922            |
| 495  | 259279  | Tubgcp3       | tubulin, gamma complex associated protein 3                                        | 0               | 3               | 2                | -1.96853            |
| 496  | 233489  | Picalm        | phosphatidylinositol binding clathrin assembly protein                             | 0               | 3               | 2                | -1.96836            |
| 497  | 101613  | Nalp6         | NLR family, pyrin domain containing 6                                              | 0               | 3               | 1                | -1.96654            |
| 498  | 19933   | Rpl21         | ribosomal protein L21                                                              | 0               | 5               | 0                | -1.96531            |
| 499  | 71735   | 1200011O22Rik | leucine-rich repeats and WD repeat domain containing 1                             | 0               | 4               | 1                | -1.96512            |
| 500  | 229658  | Vangl1        | vang-like 1 (van gogh, Drosophila)                                                 | 0               | 4               | 1                | -1.96473            |
| 501  | 67731   | Fbxo32        | F-box protein 32                                                                   | 0               | 4               | 1                | -1.96465            |
| 502  | 77963   | Hook1         | hook homolog 1 (Drosophila)                                                        | 0               | 3               | 2                | -1.9641             |
| 503  | 27274   | Zfp354b       | zinc finger protein 354B                                                           | 0               | 3               | 2                | -1.96383            |
| 504  | 20630   | Snrp1c        | U1 small nuclear ribonucleoprotein C                                               | 0               | 4               | 1                | -1.96285            |
| 505  | 107767  | Scamp1        | secretory carrier membrane protein 1                                               | 0               | 4               | 1                | -1.96096            |
| 506  | 20055   | Rps16         | ribosomal protein S16                                                              | 0               | 3               | 2                | -1.96068            |
| 507  | 434390  | UNK           | NA                                                                                 | 0               | 3               | 2                | -1.96064            |
| 508  | 12927   | Bcar1         | breast cancer anti-estrogen resistance 1                                           | 0               | 3               | 2                | -1.96022            |
| 509  | 57267   | Apba3         | amyloid beta (A4) precursor protein-binding, family A, member 3                    | 0               | 5               | 0                | -1.96014            |
| 510  | 229543  | Ints3         | integrator complex subunit 3                                                       | 0               | 4               | 1                | -1.95878            |
| 511  | 66309   | Tmem128       | transmembrane protein 128                                                          | 0               | 5               | 0                | -1.95817            |
| 512  | 75425   | 2610036D13Rik | TELO2 interacting protein 1                                                        | 0               | 3               | 2                | -1.95816            |
| 513  | 382985  | Rrm2b         | ribonucleotide reductase M2 B (TP53 inducible)                                     | 0               | 3               | 2                | -1.95781            |
| 514  | 258385  | Olf1323       | olfactory receptor 1323                                                            | 0               | 4               | 0                | -1.95761            |

Candidates for positive regulators of normal growth (Fisher's)

| Rank | entrez# | Gene Symbol   | Gene name                                                                           | enriched shRNAs | depleted shRNAs | no change shRNAs | average Fold Change |
|------|---------|---------------|-------------------------------------------------------------------------------------|-----------------|-----------------|------------------|---------------------|
| 515  | 67143   | Zfpn1a5       | IKAROS family zinc finger 5                                                         | 0               | 4               | 1                | -1.95707            |
| 516  | 17533   | Mrc1          | mannose receptor, C type 1                                                          | 0               | 3               | 2                | -1.95706            |
| 517  | 74091   | Npl           | N-acetylneuraminase pyruvate lyase                                                  | 0               | 3               | 2                | -1.95552            |
| 518  | 380660  | 8430416H19Rik | acyl-CoA synthetase short-chain family member 3                                     | 0               | 3               | 2                | -1.95501            |
| 519  | 233490  | Zf1           | CREB/ATF bZIP transcription factor                                                  | 0               | 3               | 2                | -1.95497            |
| 520  | 15378   | Hnf4a         | hepatic nuclear factor 4, alpha                                                     | 0               | 3               | 2                | -1.9548             |
| 521  | 69481   | 1700029I08Rik | actin-like 9                                                                        | 0               | 3               | 2                | -1.9544             |
| 522  | 19179   | Psmc1         | protease (prosome, macropain) 26S subunit, ATPase 1                                 | 0               | 4               | 1                | -1.95331            |
| 523  | 54709   | Eif3s2        | eukaryotic translation initiation factor 3, subunit I                               | 0               | 4               | 1                | -1.95324            |
| 524  | 26437   | Psg17         | pregnancy specific glycoprotein 17                                                  | 0               | 3               | 2                | -1.95283            |
| 525  | 18534   | Pck1          | phosphoenolpyruvate carboxykinase 1, cytosolic                                      | 0               | 4               | 1                | -1.9526             |
| 526  | 103511  | BB146404      | family with sequence similarity 26, member E                                        | 0               | 3               | 2                | -1.95214            |
| 527  | 320825  | E130306M17Rik | sterile alpha motif domain containing 5                                             | 0               | 3               | 1                | -1.95214            |
| 528  | 64454   | Slc5a4b       | solute carrier family 5 (neutral amino acid transporters, system A), member 4b      | 0               | 3               | 2                | -1.95146            |
| 529  | 12062   | Bdkrb2        | bradykinin receptor, beta 2                                                         | 0               | 4               | 1                | -1.95145            |
| 530  | 11827   | Aqp2          | aquaporin 2                                                                         | 0               | 3               | 2                | -1.95132            |
| 531  | 217262  | Abca9         | ATP-binding cassette, sub-family A (ABC1), member 9                                 | 0               | 3               | 2                | -1.95091            |
| 532  | 13848   | Ephb6         | Eph receptor B6                                                                     | 0               | 3               | 2                | -1.95022            |
| 533  | 237436  | Gas2l3        | growth arrest-specific 2 like 3                                                     | 0               | 4               | 1                | -1.94982            |
| 534  | 74424   | Tmc5          | transmembrane channel-like gene family 5                                            | 0               | 3               | 2                | -1.9498             |
| 535  | 67254   | 2900011O08Rik | RIKEN cDNA 2900011O08 gene                                                          | 0               | 3               | 2                | -1.94908            |
| 536  | 18103   | Nme2          | non-metastatic cells 2, protein (NM23B) expressed in                                | 0               | 7               | 3                | -1.94884            |
| 537  | 18174   | Slc11a2       | solute carrier family 11 (proton-coupled divalent metal ion transporters), member 2 | 0               | 3               | 2                | -1.94878            |
| 538  | 78304   | Lsmd1         | LSM domain containing 1                                                             | 0               | 4               | 1                | -1.94864            |
| 539  | 22088   | Tsg101        | tumor susceptibility gene 101                                                       | 0               | 4               | 1                | -1.94828            |
| 540  | 18997   | Pou4f2        | POU domain, class 4, transcription factor 2                                         | 0               | 3               | 2                | -1.94611            |
| 541  | 66317   | Wdr61         | WD repeat domain 61                                                                 | 0               | 4               | 1                | -1.94603            |
| 542  | 100226  | Stx12         | syntaxin 12                                                                         | 0               | 3               | 2                | -1.9459             |
| 543  | 18805   | Plid1         | phospholipase D1                                                                    | 0               | 3               | 2                | -1.94544            |
| 544  | 27078   | Eppb9         | B9 protein domain 1                                                                 | 0               | 5               | 0                | -1.94479            |
| 545  | 93675   | Clec2i        | C-type lectin domain family 2, member i                                             | 0               | 3               | 2                | -1.94368            |
| 546  | 225264  | LOC225264     | pyruvate kinase, muscle pseudogene                                                  | 0               | 3               | 2                | -1.94306            |
| 547  | 12458   | Ccr6          | chemokine (C-C motif) receptor 6                                                    | 0               | 4               | 1                | -1.94214            |
| 548  | 403183  | 4832428D23Rik | RIKEN cDNA 4832428D23 gene                                                          | 0               | 3               | 1                | -1.94193            |
| 549  | 15408   | Hoxb13        | homeobox B13                                                                        | 0               | 3               | 2                | -1.94132            |
| 550  | 72544   | Exosc6        | exosome component 6                                                                 | 0               | 3               | 1                | -1.94079            |
| 551  | 230103  | Npr2          | natriuretic peptide receptor 2                                                      | 0               | 5               | 5                | -1.9403             |

Candidates for positive regulators of normal growth (Fisher's)

| Rank | entrez# | Gene Symbol   | Gene name                                                                | enriched shRNAs | depleted shRNAs | no change shRNAs | average Fold Change |
|------|---------|---------------|--------------------------------------------------------------------------|-----------------|-----------------|------------------|---------------------|
| 552  | 78444   | C330024D12Rik | pyroglutamyl-peptidase I-like                                            | 0               | 3               | 2                | -1.93918            |
| 553  | 67126   | Atp5e         | ATP synthase, H+ transporting, mitochondrial F1 complex, epsilon subunit | 0               | 3               | 2                | -1.93905            |
| 554  | 319476  | Lrtm1         | leucine-rich repeats and transmembrane domains 1                         | 0               | 4               | 1                | -1.93843            |
| 555  | 13681   | Eif4a1        | eukaryotic translation initiation factor 4A1                             | 0               | 5               | 0                | -1.9378             |
| 556  | 67710   | Polr2g        | polymerase (RNA) II (DNA directed) polypeptide G                         | 0               | 3               | 2                | -1.93766            |
| 557  | 52855   | Lair1         | leukocyte-associated Ig-like receptor 1                                  | 0               | 3               | 1                | -1.93763            |
| 558  | 18476   | Pafah1b3      | platelet-activating factor acetylhydrolase, isoform 1b, subunit 3        | 0               | 3               | 2                | -1.93664            |
| 559  | 18740   | Pitx1         | paired-like homeodomain transcription factor 1                           | 0               | 4               | 1                | -1.9364             |
| 560  | 56787   | Ascl3         | achaete-scute complex homolog 3 (Drosophila)                             | 0               | 4               | 1                | -1.93627            |
| 561  | 30838   | Fbxw4         | F-box and WD-40 domain protein 4                                         | 0               | 3               | 1                | -1.93605            |
| 562  | 68394   | 0610037D15Rik | coiled-coil domain containing 163                                        | 0               | 5               | 0                | -1.93533            |
| 563  | 13909   | LOC13909      | carboxylesterase 3B                                                      | 0               | 3               | 2                | -1.935              |
| 564  | 320435  | 5830482F20Rik | Ras and Rab interactor-like                                              | 0               | 4               | 1                | -1.93497            |
| 565  | 64085   | Clstn2        | calyntenin 2                                                             | 0               | 3               | 2                | -1.93417            |
| 566  | 20609   | Sstr5         | somatostatin receptor 5                                                  | 0               | 3               | 2                | -1.93344            |
| 567  | 214580  | Pstk          | phosphoseryl-tRNA kinase                                                 | 0               | 3               | 2                | -1.93242            |
| 568  | 16582   | Kifc3         | kinesin family member C3                                                 | 0               | 3               | 2                | -1.93239            |
| 569  | 20813   | Srp14         | signal recognition particle 14                                           | 0               | 3               | 2                | -1.93199            |
| 570  | 20517   | Slc22a1       | solute carrier family 22 (organic cation transporter), member 1          | 0               | 3               | 2                | -1.93159            |
| 571  | 30853   | Mlf2          | myeloid leukemia factor 2                                                | 0               | 4               | 1                | -1.93056            |
| 572  | 71966   | Nkiras2       | NFKB inhibitor interacting Ras-like protein 2                            | 0               | 3               | 2                | -1.93018            |
| 573  | 239151  | Gm600         | NA                                                                       | 0               | 3               | 2                | -1.92923            |
| 574  | 100465  | Mobkl2c       | MOB kinase activator 3C                                                  | 0               | 3               | 2                | -1.92889            |
| 575  | 12613   | Cel           | carboxyl ester lipase                                                    | 0               | 3               | 2                | -1.92809            |
| 576  | 12824   | Col2a1        | collagen, type II, alpha 1                                               | 0               | 3               | 2                | -1.9279             |
| 577  | 60365   | Rbm8a         | RNA binding motif protein 8a                                             | 0               | 5               | 0                | -1.92651            |
| 578  | 212647  | Aldh4a1       | aldehyde dehydrogenase 4 family, member A1                               | 0               | 4               | 1                | -1.92639            |
| 579  | 11733   | Ank1          | ankyrin 1, erythroid                                                     | 0               | 4               | 1                | -1.92594            |
| 580  | 216285  | Cart1         | ALX homeobox 1                                                           | 0               | 4               | 1                | -1.92505            |
| 581  | 20229   | Sat1          | spermidine/spermine N1-acetyl transferase 1                              | 0               | 3               | 2                | -1.9236             |
| 582  | 12475   | Cd14          | CD14 antigen                                                             | 0               | 3               | 2                | -1.92356            |
| 583  | 74763   | 1200013P24Rik | N-acetyltransferase 15 (GCN5-related, putative)                          | 0               | 3               | 2                | -1.92312            |
| 584  | 23908   | Hs2st1        | heparan sulfate 2-O-sulfotransferase 1                                   | 0               | 3               | 2                | -1.92276            |
| 585  | 12804   | Cntrf         | ciliary neurotrophic factor receptor                                     | 0               | 3               | 2                | -1.92226            |
| 586  | 19046   | Ppp1cb        | protein phosphatase 1, catalytic subunit, beta isoform                   | 0               | 3               | 2                | -1.92207            |
| 587  | 53324   | Nptx2         | neuronal pentraxin 2                                                     | 0               | 3               | 2                | -1.92197            |
| 588  | 15115   | Hars          | histidyl-tRNA synthetase                                                 | 0               | 3               | 2                | -1.92145            |

Candidates for positive regulators of normal growth (Fisher's)

| Rank | entrez# | Gene Symbol   | Gene name                                                                                | enriched shRNAs | depleted shRNAs | no change shRNAs | average Fold Change |
|------|---------|---------------|------------------------------------------------------------------------------------------|-----------------|-----------------|------------------|---------------------|
| 589  | 12235   | Bub1          | budding uninhibited by benzimidazoles 1 homolog ( <i>S. cerevisiae</i> )                 | 0               | 3               | 2                | -1.92133            |
| 590  | 433718  | UNK           | NA                                                                                       | 0               | 4               | 1                | -1.92012            |
| 591  | 379043  | Raet1e        | retinoic acid early transcript 1E                                                        | 0               | 3               | 2                | -1.91975            |
| 592  | 18976   | Pomc1         | pro-opiomelanocortin-alpha                                                               | 0               | 3               | 2                | -1.91934            |
| 593  | 19089   | Prkcsh        | protein kinase C substrate 80K-H                                                         | 0               | 3               | 2                | -1.91885            |
| 594  | 108052  | Slc14a1       | solute carrier family 14 (urea transporter), member 1                                    | 0               | 3               | 2                | -1.91821            |
| 595  | 227800  | Rabgap1       | RAB GTPase activating protein 1                                                          | 0               | 3               | 1                | -1.91761            |
| 596  | 381968  | UNK           | NA                                                                                       | 0               | 3               | 2                | -1.91717            |
| 597  | 11479   | Acvr1b        | activin A receptor, type 1B                                                              | 0               | 4               | 1                | -1.91702            |
| 598  | 435287  | UNK           | NA                                                                                       | 0               | 4               | 1                | -1.91616            |
| 599  | 23853   | Def6          | differentially expressed in FDCP 6                                                       | 0               | 3               | 2                | -1.91608            |
| 600  | 72552   | Hsd11         | hydroxysteroid dehydrogenase like 1                                                      | 0               | 3               | 2                | -1.91506            |
| 601  | 16367   | Irs1          | insulin receptor substrate 1                                                             | 0               | 3               | 2                | -1.91464            |
| 602  | 80284   | BC003266      | cDNA sequence BC003266                                                                   | 0               | 3               | 2                | -1.91438            |
| 603  | 70359   | Gtpbp3        | GTP binding protein 3                                                                    | 0               | 3               | 2                | -1.91416            |
| 604  | 105148  | Iars          | isoleucine-tRNA synthetase                                                               | 0               | 4               | 1                | -1.91386            |
| 605  | 14293   | Fpr1          | formyl peptide receptor 1                                                                | 0               | 3               | 2                | -1.91314            |
| 606  | 26936   | AA536749      | myosin phosphatase Rho interacting protein                                               | 0               | 3               | 2                | -1.91214            |
| 607  | 17749   | Polr2k        | polymerase (RNA) II (DNA directed) polypeptide K                                         | 0               | 4               | 1                | -1.91149            |
| 608  | 24075   | Taf10         | TAF10 RNA polymerase II, TATA box binding protein (TBP)-associated factor                | 0               | 4               | 6                | -1.91072            |
| 609  | 70481   | Pnma1         | paraneoplastic antigen MA1                                                               | 0               | 3               | 2                | -1.91055            |
| 610  | 360214  | Defb39        | defensin beta 39                                                                         | 0               | 3               | 2                | -1.91008            |
| 611  | 546631  | Gm300         | NA                                                                                       | 0               | 3               | 2                | -1.90905            |
| 612  | 226866  | Gm106         | predicted gene 106                                                                       | 0               | 3               | 2                | -1.9074             |
| 613  | 109032  | 5830484A20Rik | Sp110 nuclear body protein                                                               | 0               | 3               | 2                | -1.90736            |
| 614  | 15223   | Foxj1         | forkhead box J1                                                                          | 0               | 4               | 1                | -1.90732            |
| 615  | 71986   | Ddx28         | DEAD (Asp-Glu-Ala-Asp) box polypeptide 28                                                | 0               | 4               | 1                | -1.90651            |
| 616  | 56194   | Prpf40a       | PRP40 pre-mRNA processing factor 40 homolog A (yeast)                                    | 0               | 5               | 0                | -1.90572            |
| 617  | 54401   | Ywhab         | tyrosine 3-monooxygenase/tryptophan 5-monooxygenase activation protein, beta polypeptide | 0               | 4               | 1                | -1.90556            |
| 618  | 72112   | Ppp1r14d      | protein phosphatase 1, regulatory (inhibitor) subunit 14D                                | 0               | 4               | 1                | -1.90551            |
| 619  | 110524  | Dgkq          | diacylglycerol kinase, theta                                                             | 0               | 4               | 1                | -1.90465            |
| 620  | 434496  | UNK           | NA                                                                                       | 0               | 4               | 1                | -1.90451            |
| 621  | 68135   | Eif3s3        | eukaryotic translation initiation factor 3, subunit H                                    | 0               | 4               | 1                | -1.90331            |
| 622  | 73677   | PsmA8         | proteasome (prosome, macropain) subunit, alpha type, 8                                   | 0               | 4               | 1                | -1.90322            |
| 623  | 13164   | Dazl          | deleted in azoospermia-like                                                              | 0               | 3               | 2                | -1.90307            |
| 624  | 108911  | Rcc2          | regulator of chromosome condensation 2                                                   | 0               | 3               | 2                | -1.90298            |
| 625  | 381286  | Serpinb3c     | serine (or cysteine) peptidase inhibitor, clade B, member 3C                             | 0               | 3               | 2                | -1.90284            |

Candidates for positive regulators of normal growth (Fisher's)

| Rank | entrez# | Gene Symbol   | Gene name                                                                      | enriched shRNAs | depleted shRNAs | no change shRNAs | average Fold Change |
|------|---------|---------------|--------------------------------------------------------------------------------|-----------------|-----------------|------------------|---------------------|
| 626  | 67943   | Mesdc2        | mesoderm development candidate 2                                               | 0               | 4               | 0                | -1.90192            |
| 627  | 243274  | Tmem132d      | transmembrane protein 132D                                                     | 0               | 3               | 1                | -1.90154            |
| 628  | 380601  | C78212        | FAST kinase domains 5                                                          | 0               | 3               | 2                | -1.90123            |
| 629  | 14208   | Ppm1g         | protein phosphatase 1G (formerly 2C), magnesium-dependent, gamma isoform       | 0               | 3               | 2                | -1.9006             |
| 630  | 66882   | Bzw1          | basic leucine zipper and W2 domains 1                                          | 0               | 3               | 2                | -1.90029            |
| 631  | 58206   | Zbtb32        | zinc finger and BTB domain containing 32                                       | 0               | 3               | 2                | -1.90024            |
| 632  | 75721   | 4932414N04Rik | RIKEN cDNA 4932414N04 gene                                                     | 0               | 3               | 2                | -1.89971            |
| 633  | 11807   | Apoa2         | apolipoprotein A-II                                                            | 0               | 3               | 2                | -1.89951            |
| 634  | 245619  | UNK           | NA                                                                             | 0               | 3               | 2                | -1.89724            |
| 635  | 11782   | Ap4s1         | adaptor-related protein complex AP-4, sigma 1                                  | 0               | 4               | 1                | -1.89716            |
| 636  | 320795  | Pkn1          | protein kinase N1                                                              | 0               | 4               | 0                | -1.89628            |
| 637  | 209225  | Zfp710        | zinc finger protein 710                                                        | 0               | 3               | 2                | -1.89624            |
| 638  | 66885   | Acad5b        | acyl-Coenzyme A dehydrogenase, short/branched chain                            | 0               | 4               | 1                | -1.89596            |
| 639  | 15504   | Dnajb3        | DnaJ (Hsp40) homolog, subfamily B, member 3                                    | 0               | 3               | 2                | -1.89573            |
| 640  | 258904  | Olf1221       | olfactory receptor 1221                                                        | 0               | 4               | 1                | -1.89532            |
| 641  | 18784   | Pla2g5        | phospholipase A2, group V                                                      | 0               | 3               | 2                | -1.89498            |
| 642  | 12715   | Ckm           | creatine kinase, muscle                                                        | 0               | 3               | 2                | -1.89456            |
| 643  | 13406   | Dmp1          | dentin matrix protein 1                                                        | 0               | 4               | 1                | -1.89452            |
| 644  | 71904   | Paqr7         | progesterone and adipoQ receptor family member VII                             | 0               | 5               | 0                | -1.89412            |
| 645  | 74133   | 1200011M11Rik | RIKEN cDNA 1200011M11 gene                                                     | 0               | 4               | 1                | -1.89191            |
| 646  | 381813  | Prmt8         | protein arginine N-methyltransferase 8                                         | 0               | 3               | 2                | -1.89131            |
| 647  | 56717   | Frap1         | mechanistic target of rapamycin (serine/threonine kinase)                      | 0               | 4               | 6                | -1.89038            |
| 648  | 328752  | UNK           | NA                                                                             | 0               | 3               | 2                | -1.89009            |
| 649  | 67030   | Fancl         | Fanconi anemia, complementation group L                                        | 0               | 4               | 1                | -1.88983            |
| 650  | 15463   | Hrb           | ArfGAP with FG repeats 1                                                       | 0               | 3               | 2                | -1.88948            |
| 651  | 18120   | Mrpl49        | mitochondrial ribosomal protein L49                                            | 0               | 3               | 2                | -1.88939            |
| 652  | 98363   | Efh1          | EF hand domain containing 1                                                    | 0               | 4               | 1                | -1.88927            |
| 653  | 216616  | Efemp1        | epidermal growth factor-containing fibulin-like extracellular matrix protein 1 | 0               | 3               | 2                | -1.8892             |
| 654  | 110532  | Adarb1        | adenosine deaminase, RNA-specific, B1                                          | 0               | 3               | 1                | -1.88919            |
| 655  | 19735   | Rgs2          | regulator of G-protein signaling 2                                             | 0               | 3               | 7                | -1.88904            |
| 656  | 12015   | Bad           | BCL2-associated agonist of cell death                                          | 0               | 3               | 2                | -1.88782            |
| 657  | 56336   | B4galt5       | UDP-Gal:betaGlcNAc beta 1,4-galactosyltransferase, polypeptide 5               | 0               | 3               | 2                | -1.88779            |
| 658  | 216019  | Hkdc1         | hexokinase domain containing 1                                                 | 0               | 5               | 0                | -1.88732            |
| 659  | 433995  | UNK           | NA                                                                             | 0               | 3               | 2                | -1.88719            |
| 660  | 14171   | Fgf17         | fibroblast growth factor 17                                                    | 0               | 4               | 0                | -1.88717            |
| 661  | 171194  | V1rc21        | vomeroneural 1 receptor 4                                                      | 0               | 3               | 2                | -1.88685            |
| 662  | 56040   | Rplp1         | ribosomal protein, large, P1                                                   | 0               | 3               | 2                | -1.88674            |

Candidates for positive regulators of normal growth (Fisher's)

| Rank | entrez# | Gene Symbol   | Gene name                                                                                         | enriched shRNAs | depleted shRNAs | no change shRNAs | average Fold Change |
|------|---------|---------------|---------------------------------------------------------------------------------------------------|-----------------|-----------------|------------------|---------------------|
| 663  | 19268   | Ptpnf         | protein tyrosine phosphatase, receptor type, F                                                    | 0               | 4               | 1                | -1.88565            |
| 664  | 75185   | 4930542N07Rik | RIKEN cDNA 4930542N07 gene                                                                        | 0               | 3               | 1                | -1.88539            |
| 665  | 243377  | Svs1          | seminal vesicle secretory protein 1                                                               | 0               | 4               | 1                | -1.88507            |
| 666  | 209131  | Snx30         | sorting nexin family member 30                                                                    | 0               | 3               | 2                | -1.88481            |
| 667  | 11568   | Aebp1         | AE binding protein 1                                                                              | 0               | 4               | 6                | -1.8843             |
| 668  | 258450  | Olf1199       | olfactory receptor 1199                                                                           | 0               | 3               | 2                | -1.88421            |
| 669  | 54197   | Rnf5          | ring finger protein 5                                                                             | 0               | 4               | 1                | -1.88412            |
| 670  | 76804   | Jmjd2c        | lysine (K)-specific demethylase 4C                                                                | 0               | 3               | 2                | -1.88391            |
| 671  | 215890  | A330019N05Rik | clavesin 2                                                                                        | 0               | 3               | 2                | -1.88371            |
| 672  | 320640  | 9530098N22Rik | selection and upkeep of intraepithelial T cells 4                                                 | 0               | 3               | 1                | -1.88335            |
| 673  | 15557   | Htr1f         | 5-hydroxytryptamine (serotonin) receptor 1F                                                       | 0               | 3               | 2                | -1.88315            |
| 674  | 19062   | RP23-136K12.4 | inositol polyphosphate 5-phosphatase K                                                            | 0               | 3               | 2                | -1.88184            |
| 675  | 11982   | Atp10a        | ATPase, class V, type 10A                                                                         | 0               | 3               | 2                | -1.88118            |
| 676  | 14651   | Hagh          | hydroxyacyl glutathione hydrolase                                                                 | 0               | 4               | 1                | -1.8809             |
| 677  | 18096   | Nkx6-1        | NK6 homeobox 1                                                                                    | 0               | 3               | 2                | -1.88052            |
| 678  | 14394   | Gabra1        | gamma-aminobutyric acid (GABA) A receptor, subunit alpha 1                                        | 0               | 4               | 0                | -1.88037            |
| 679  | 66089   | Rmnd5b        | required for meiotic nuclear division 5 homolog B (S. cerevisiae)                                 | 0               | 3               | 2                | -1.88002            |
| 680  | 67445   | C1qtnf4       | C1q and tumor necrosis factor related protein 4                                                   | 0               | 3               | 2                | -1.87958            |
| 681  | 171095  | Il17rc        | interleukin 17 receptor C                                                                         | 0               | 3               | 2                | -1.87947            |
| 682  | 21976   | Top3b         | topoisomerase (DNA) III beta                                                                      | 0               | 3               | 2                | -1.87936            |
| 683  | 69282   | 1700001J03Rik | RIKEN cDNA 1700001J03 gene                                                                        | 0               | 3               | 2                | -1.87896            |
| 684  | 381971  | UNK           | NA                                                                                                | 0               | 3               | 2                | -1.87889            |
| 685  | 73534   | 1700082M22Rik | RIKEN cDNA 1700082M22 gene                                                                        | 0               | 3               | 2                | -1.87804            |
| 686  | 20167   | Rtn2          | reticulon 2 (Z-band associated protein)                                                           | 0               | 3               | 2                | -1.87755            |
| 687  | 66622   | 5730410I19Rik | ubiquitin protein ligase E3 component n-recognin 7 (putative)                                     | 0               | 4               | 0                | -1.87738            |
| 688  | 21872   | Tjp1          | tight junction protein 1                                                                          | 0               | 3               | 2                | -1.87538            |
| 689  | 53951   | 2310002B06Rik | coiled-coil domain containing 75                                                                  | 0               | 3               | 2                | -1.87515            |
| 690  | 13007   | Csrp1         | cysteine and glycine-rich protein 1                                                               | 0               | 3               | 2                | -1.87472            |
| 691  | 78249   | Gpr115        | G protein-coupled receptor 115                                                                    | 0               | 3               | 2                | -1.87316            |
| 692  | 242109  | Zfp697        | zinc finger protein 697                                                                           | 0               | 4               | 1                | -1.87208            |
| 693  | 69787   | Anxa13        | annexin A13                                                                                       | 0               | 5               | 0                | -1.87164            |
| 694  | 69537   | Dnase1l1      | deoxyribonuclease 1-like 1                                                                        | 0               | 3               | 2                | -1.87101            |
| 695  | 66244   | Sdccag1       | nuclear export mediator factor                                                                    | 0               | 3               | 2                | -1.87003            |
| 696  | 20588   | Smarcc1       | SWI/SNF related, matrix associated, actin dependent regulator of chromatin, subfamily c, member 1 | 0               | 4               | 1                | -1.86982            |
| 697  | 17768   | Mthfd2        | methylenetetrahydrofolate dehydrogenase (NAD+ dependent), methenyltetrahydrofolate cyclohydrolase | 0               | 3               | 2                | -1.86903            |
| 698  | 11499   | Adam5         | a disintegrin and metallopeptidase domain 5                                                       | 0               | 3               | 2                | -1.86898            |
| 699  | 213649  | Arhgef19      | Rho guanine nucleotide exchange factor (GEF) 19                                                   | 0               | 3               | 2                | -1.86754            |

Candidates for positive regulators of normal growth (Fisher's)

| Rank | entrez# | Gene Symbol   | Gene name                                                            | enriched shRNAs | depleted shRNAs | no change shRNAs | average Fold Change |
|------|---------|---------------|----------------------------------------------------------------------|-----------------|-----------------|------------------|---------------------|
| 700  | 227683  | Coq4          | coenzyme Q4 homolog (yeast)                                          | 0               | 4               | 1                | -1.86726            |
| 701  | 73103   | 3110009E18Rik | RIKEN cDNA 3110009E18 gene                                           | 0               | 3               | 1                | -1.86722            |
| 702  | 18041   | Nfs1          | nitrogen fixation gene 1 (S. cerevisiae)                             | 0               | 4               | 1                | -1.86722            |
| 703  | 13492   | Drd5          | dopamine receptor D5                                                 | 0               | 3               | 2                | -1.86672            |
| 704  | 72947   | 2900006B13Rik | alanine-glyoxylate aminotransferase 2-like 2                         | 0               | 3               | 2                | -1.86649            |
| 705  | 383100  | UNK           | NA                                                                   | 0               | 3               | 2                | -1.86636            |
| 706  | 12070   | Ngfrap1       | nerve growth factor receptor (TNFRSF16) associated protein 1         | 0               | 3               | 2                | -1.86618            |
| 707  | 102626  | Mapkapk3      | mitogen-activated protein kinase-activated protein kinase 3          | 0               | 3               | 7                | -1.86546            |
| 708  | 258374  | Olf127        | olfactory receptor 127                                               | 0               | 3               | 1                | -1.86537            |
| 709  | 69876   | Thap3         | THAP domain containing, apoptosis associated protein 3               | 0               | 3               | 1                | -1.86475            |
| 710  | 103142  | Rdh9          | retinol dehydrogenase 9                                              | 0               | 4               | 1                | -1.86428            |
| 711  | 28113   | Tinf2         | Terf1 (TRF1)-interacting nuclear factor 2                            | 0               | 3               | 2                | -1.86384            |
| 712  | 16511   | Kcnh2         | potassium voltage-gated channel, subfamily H (eag-related), member 2 | 0               | 4               | 1                | -1.86335            |
| 713  | 383458  | UNK           | NA                                                                   | 0               | 3               | 2                | -1.86257            |
| 714  | 11836   | Araf          | v-raf murine sarcoma 3611 viral oncogene homolog                     | 0               | 4               | 6                | -1.86252            |
| 715  | 328547  | A830008O07Rik | NA                                                                   | 0               | 3               | 2                | -1.86233            |
| 716  | 72978   | Cnih3         | cornichon homolog 3 (Drosophila)                                     | 0               | 3               | 2                | -1.86192            |
| 717  | 103844  | A1842396      | inhibitor of CDK, cyclin A1 interacting protein 1                    | 0               | 3               | 2                | -1.86034            |
| 718  | 67334   | 1700054O13Rik | RIKEN cDNA 1700054O13 gene                                           | 0               | 4               | 1                | -1.86023            |
| 719  | 259083  | Olf1547       | olfactory receptor 547                                               | 0               | 3               | 1                | -1.86009            |
| 720  | 74781   | Wipi2         | WD repeat domain, phosphoinositide interacting 2                     | 0               | 3               | 1                | -1.85955            |
| 721  | 15039   | H2-T22        | histocompatibility 2, T region locus 22                              | 0               | 4               | 1                | -1.85939            |
| 722  | 67204   | Eif2s2        | eukaryotic translation initiation factor 2, subunit 2 (beta)         | 0               | 3               | 2                | -1.85873            |
| 723  | 75627   | Snopc1        | small nuclear RNA activating complex, polypeptide 1                  | 0               | 5               | 0                | -1.85789            |
| 724  | 18706   | Pik3ca        | phosphatidylinositol 3-kinase, catalytic, alpha polypeptide          | 0               | 3               | 2                | -1.85785            |
| 725  | 258456  | Olf1196       | olfactory receptor 1196                                              | 0               | 3               | 2                | -1.85694            |
| 726  | 14600   | Ghr           | growth hormone receptor                                              | 0               | 3               | 2                | -1.85638            |
| 727  | 434777  | UNK           | NA                                                                   | 0               | 4               | 1                | -1.8561             |
| 728  | 64652   | Nisch         | nischarin                                                            | 0               | 3               | 2                | -1.85593            |
| 729  | 55944   | Eif3s7        | eukaryotic translation initiation factor 3, subunit D                | 0               | 4               | 0                | -1.85477            |
| 730  | 70375   | Ica1l         | islet cell autoantigen 1-like                                        | 0               | 3               | 2                | -1.85435            |
| 731  | 382741  | UNK           | NA                                                                   | 0               | 3               | 2                | -1.85412            |
| 732  | 209380  | LOC209380     | GTPase, very large interferon inducible 1 pseudogene                 | 0               | 3               | 1                | -1.85385            |
| 733  | 77579   | Myh10         | myosin, heavy polypeptide 10, non-muscle                             | 0               | 3               | 2                | -1.85374            |
| 734  | 52683   | D15Ert785e    | non-SMC condensin II complex, subunit H2                             | 0               | 3               | 2                | -1.85311            |
| 735  | 384814  | LOC384814     | predicted gene 5347                                                  | 0               | 4               | 1                | -1.85305            |
| 736  | 74025   | Nphp3         | nephronophthisis 3 (adolescent)                                      | 0               | 3               | 2                | -1.85262            |

Candidates for positive regulators of normal growth (Fisher's)

| Rank | entrez# | Gene Symbol   | Gene name                                                                       | enriched shRNAs | depleted shRNAs | no change shRNAs | average Fold Change |
|------|---------|---------------|---------------------------------------------------------------------------------|-----------------|-----------------|------------------|---------------------|
| 737  | 12671   | Chrm3         | cholinergic receptor, muscarinic 3, cardiac                                     | 0               | 4               | 1                | -1.85183            |
| 738  | 22601   | Yap1          | yes-associated protein 1                                                        | 0               | 5               | 0                | -1.85117            |
| 739  | 21859   | Timp3         | tissue inhibitor of metalloproteinase 3                                         | 0               | 3               | 2                | -1.85086            |
| 740  | 72345   | 2810002O09Rik | family with sequence similarity 123, member B                                   | 0               | 4               | 1                | -1.85078            |
| 741  | 20602   | Ncor2         | nuclear receptor co-repressor 2                                                 | 0               | 3               | 2                | -1.84995            |
| 742  | 77432   | 9530002B09Rik | RIKEN cDNA 9530002B09 gene                                                      | 0               | 3               | 2                | -1.84943            |
| 743  | 19892   | Rpe65         | retinal pigment epithelium 65                                                   | 0               | 3               | 2                | -1.84897            |
| 744  | 53896   | Slc7a10       | solute carrier family 7 (cationic amino acid transporter, y+ system), member 10 | 0               | 3               | 2                | -1.84897            |
| 745  | 71900   | Tmem106b      | transmembrane protein 106B                                                      | 0               | 3               | 2                | -1.84889            |
| 746  | 258601  | Olf984        | olfactory receptor 984                                                          | 0               | 3               | 2                | -1.84854            |
| 747  | 66557   | Bpil1         | BPI fold containing family B, member 2                                          | 0               | 4               | 1                | -1.84829            |
| 748  | 245841  | Polr2h        | polymerase (RNA) II (DNA directed) polypeptide H                                | 0               | 4               | 1                | -1.84813            |
| 749  | 215632  | Psd4          | pleckstrin and Sec7 domain containing 4                                         | 0               | 3               | 2                | -1.8481             |
| 750  | 258991  | Olf1496       | olfactory receptor 1496                                                         | 0               | 3               | 2                | -1.8474             |
| 751  | 244672  | Cwf19l2       | CWF19-like 2, cell cycle control (S. pombe)                                     | 0               | 3               | 2                | -1.84649            |
| 752  | 76653   | 1700121K02Rik | chibby homolog 3 (Drosophila)                                                   | 0               | 3               | 2                | -1.84567            |
| 753  | 17882   | Myh2          | myosin, heavy polypeptide 2, skeletal muscle, adult                             | 0               | 3               | 2                | -1.84495            |
| 754  | 320558  | 4930518F03Rik | synaptonemal complex protein 2                                                  | 0               | 3               | 1                | -1.84429            |
| 755  | 102857  | Slc6a8        | solute carrier family 6 (neurotransmitter transporter, creatine), member 8      | 0               | 3               | 2                | -1.84338            |
| 756  | 103172  | Ndg2          | coiled-coil-helix-coiled-coil-helix domain containing 10                        | 0               | 3               | 1                | -1.8432             |
| 757  | 18952   | 39328         | septin 4                                                                        | 0               | 3               | 2                | -1.84281            |
| 758  | 67015   | Ccdc91        | coiled-coil domain containing 91                                                | 0               | 3               | 2                | -1.84273            |
| 759  | 23882   | Gadd45g       | growth arrest and DNA-damage-inducible 45 gamma                                 | 0               | 4               | 1                | -1.84255            |
| 760  | 238463  | Tubal3        | tubulin, alpha-like 3                                                           | 0               | 3               | 2                | -1.84231            |
| 761  | 109093  | Rarsl         | arginyl-tRNA synthetase 2, mitochondrial                                        | 0               | 4               | 1                | -1.84203            |
| 762  | 56513   | Pard6a        | par-6 (partitioning defective 6,) homolog alpha (C. elegans)                    | 0               | 3               | 2                | -1.8419             |
| 763  | 384894  | UNK           | NA                                                                              | 0               | 3               | 2                | -1.84177            |
| 764  | 11910   | Atf3          | activating transcription factor 3                                               | 0               | 3               | 2                | -1.84148            |
| 765  | 14944   | Gzmg          | granzyme G                                                                      | 0               | 4               | 1                | -1.84112            |
| 766  | 17183   | Matn4         | matrilin 4                                                                      | 0               | 3               | 2                | -1.8404             |
| 767  | 78689   | Mak10         | N(alpha)-acetyltransferase 35, NatC auxiliary subunit                           | 0               | 3               | 1                | -1.8403             |
| 768  | 67302   | Zc3h13        | zinc finger CCCH type containing 13                                             | 0               | 3               | 2                | -1.84027            |
| 769  | 72125   | 2600011E07Rik | family with sequence similarity 123, member A                                   | 0               | 3               | 1                | -1.83901            |
| 770  | 67248   | Rpl39         | ribosomal protein L39                                                           | 0               | 4               | 1                | -1.83896            |
| 771  | 27356   | Insl6         | insulin-like 6                                                                  | 0               | 3               | 2                | -1.8389             |
| 772  | 56210   | Rev1l         | REV1 homolog (S. cerevisiae)                                                    | 0               | 3               | 2                | -1.8384             |
| 773  | 20591   | Jarid1c       | lysine (K)-specific demethylase 5C                                              | 0               | 3               | 2                | -1.83803            |



Candidates for positive regulators of normal growth (Fisher's)

| Rank | entrez# | Gene Symbol   | Gene name                                                                                | enriched shRNAs | depleted shRNAs | no change shRNAs | average Fold Change |
|------|---------|---------------|------------------------------------------------------------------------------------------|-----------------|-----------------|------------------|---------------------|
| 774  | 208583  | Nek11         | NIMA (never in mitosis gene a)-related expressed kinase 11                               | 0               | 3               | 2                | -1.83798            |
| 775  | 52392   | D1Erd622e     | DNA segment, Chr 1, ERATO Doi 622, expressed                                             | 0               | 3               | 2                | -1.8371             |
| 776  | 16825   | Ldb1          | LIM domain binding 1                                                                     | 0               | 3               | 2                | -1.83638            |
| 777  | 19340   | Rab3d         | RAB3D, member RAS oncogene family                                                        | 0               | 3               | 2                | -1.83508            |
| 778  | 258657  | Olf733        | olfactory receptor 733                                                                   | 0               | 3               | 2                | -1.83481            |
| 779  | 79560   | Ublcp1        | ubiquitin-like domain containing CTD phosphatase 1                                       | 0               | 3               | 2                | -1.83447            |
| 780  | 67383   | 2410127L17Rik | RIKEN cDNA 2410127L17 gene                                                               | 0               | 3               | 2                | -1.83403            |
| 781  | 60504   | Il21r         | interleukin 21 receptor                                                                  | 0               | 3               | 2                | -1.83351            |
| 782  | 83434   | Rsh1          | radial spoke head 6 homolog A (Chlamydomonas)                                            | 0               | 3               | 1                | -1.83349            |
| 783  | 81907   | Tmem108       | transmembrane protein 108                                                                | 0               | 3               | 2                | -1.83328            |
| 784  | 15932   | Idua          | iduronidase, alpha-L-                                                                    | 0               | 4               | 0                | -1.83309            |
| 785  | 75188   | 1700009J07Rik | RIKEN cDNA 1700009J07 gene                                                               | 0               | 3               | 2                | -1.83304            |
| 786  | 382075  | Odf3l1        | outer dense fiber of sperm tails 3-like 1                                                | 0               | 3               | 1                | -1.83279            |
| 787  | 109978  | Art4          | ADP-ribosyltransferase 4                                                                 | 0               | 3               | 2                | -1.83201            |
| 788  | 69305   | Dcps          | decapping enzyme, scavenger                                                              | 0               | 3               | 1                | -1.83192            |
| 789  | 66589   | Ube2v1        | ubiquitin-conjugating enzyme E2 variant 1                                                | 0               | 3               | 2                | -1.83191            |
| 790  | 22642   | Zbtb17        | zinc finger and BTB domain containing 17                                                 | 0               | 4               | 1                | -1.83145            |
| 791  | 17843   | Mup4          | major urinary protein 4                                                                  | 0               | 4               | 1                | -1.83107            |
| 792  | 77683   | Ehmt1         | euchromatic histone methyltransferase 1                                                  | 0               | 3               | 2                | -1.83065            |
| 793  | 102680  | Xtrp3s1       | solute carrier family 6 (neurotransmitter transporter), member 20A                       | 0               | 3               | 2                | -1.83054            |
| 794  | 216161  | Stno          | strawberry notch homolog 2 (Drosophila)                                                  | 0               | 3               | 2                | -1.83029            |
| 795  | 66629   | Golph3        | golgi phosphoprotein 3                                                                   | 0               | 3               | 2                | -1.83007            |
| 796  | 109115  | Supt3h        | suppressor of Ty 3 homolog (S. cerevisiae)                                               | 0               | 3               | 2                | -1.82888            |
| 797  | 67320   | lqcf4         | IQ motif containing F4                                                                   | 0               | 3               | 2                | -1.82882            |
| 798  | 435477  | UNK           | NA                                                                                       | 0               | 4               | 1                | -1.82847            |
| 799  | 69207   | Sfrs11        | serine/arginine-rich splicing factor 11                                                  | 0               | 4               | 1                | -1.82823            |
| 800  | 16912   | Psmb9         | proteasome (prosome, macropain) subunit, beta type 9 (large multifunctional peptidase 2) | 0               | 3               | 2                | -1.82772            |
| 801  | 13819   | Epas1         | endothelial PAS domain protein 1                                                         | 0               | 3               | 2                | -1.82763            |
| 802  | 627468  | UNK           | NA                                                                                       | 0               | 3               | 2                | -1.82565            |
| 803  | 22698   | Zfp39         | zinc finger protein 39                                                                   | 0               | 3               | 2                | -1.82504            |
| 804  | 20196   | S100a13       | S100 calcium binding protein A13                                                         | 0               | 4               | 1                | -1.82481            |
| 805  | 73481   | 1700074P13Rik | RIKEN cDNA 1700074P13 gene                                                               | 0               | 3               | 2                | -1.82424            |
| 806  | 381815  | UNK           | NA                                                                                       | 0               | 4               | 0                | -1.82421            |
| 807  | 70031   | Cmtm8         | CKLF-like MARVEL transmembrane domain containing 8                                       | 0               | 4               | 1                | -1.82401            |
| 808  | 26414   | Mapk10        | mitogen-activated protein kinase 10                                                      | 0               | 3               | 2                | -1.82355            |
| 809  | 57294   | Rps27         | ribosomal protein S27                                                                    | 0               | 4               | 1                | -1.82314            |
| 810  | 12044   | Bcl2a1a       | B cell leukemia/lymphoma 2 related protein A1a                                           | 0               | 3               | 2                | -1.82299            |

Candidates for positive regulators of normal growth (Fisher's)

| Rank | entrez# | Gene Symbol   | Gene name                                                                                         | enriched shRNAs | depleted shRNAs | no change shRNAs | average Fold Change |
|------|---------|---------------|---------------------------------------------------------------------------------------------------|-----------------|-----------------|------------------|---------------------|
| 811  | 11625   | Ahsg          | alpha-2-HS-glycoprotein                                                                           | 0               | 3               | 2                | -1.82257            |
| 812  | 14862   | Gstm1         | glutathione S-transferase, mu 1                                                                   | 0               | 3               | 2                | -1.82214            |
| 813  | 19921   | Rpl19         | ribosomal protein L19                                                                             | 0               | 5               | 0                | -1.82193            |
| 814  | 13649   | Egfr          | epidermal growth factor receptor                                                                  | 0               | 3               | 7                | -1.82167            |
| 815  | 67980   | Gnpda2        | glucosamine-6-phosphate deaminase 2                                                               | 0               | 3               | 2                | -1.82154            |
| 816  | 16580   | Kifc1         | kinesin family member C5B                                                                         | 0               | 3               | 7                | -1.82137            |
| 817  | 72195   | Supt7l        | suppressor of Ty 7 (S. cerevisiae)-like                                                           | 0               | 3               | 1                | -1.82111            |
| 818  | 54126   | Arhgef7       | Rho guanine nucleotide exchange factor (GEF7)                                                     | 0               | 3               | 2                | -1.82072            |
| 819  | 15116   | Has1          | hyaluronan synthase1                                                                              | 0               | 3               | 2                | -1.82066            |
| 820  | 258351  | Olfir633      | olfactory receptor 633                                                                            | 0               | 3               | 1                | -1.82006            |
| 821  | 78076   | Lcn8          | lipocalin 8                                                                                       | 0               | 3               | 2                | -1.81976            |
| 822  | 11670   | Aldh3a1       | aldehyde dehydrogenase family 3, subfamily A1                                                     | 0               | 3               | 2                | -1.81939            |
| 823  | 64945   | Cldn12        | claudin 12                                                                                        | 0               | 3               | 2                | -1.81908            |
| 824  | 73016   | Kremen2       | kringle containing transmembrane protein 2                                                        | 0               | 3               | 2                | -1.81858            |
| 825  | 16994   | Ltb           | lymphotoxin B                                                                                     | 0               | 3               | 2                | -1.81807            |
| 826  | 56357   | Ivd           | isovaleryl coenzyme A dehydrogenase                                                               | 0               | 3               | 2                | -1.81752            |
| 827  | 20527   | Slc2a3        | solute carrier family 2 (facilitated glucose transporter), member 3                               | 0               | 4               | 1                | -1.81656            |
| 828  | 15078   | H3f3a         | H3 histone, family 3A                                                                             | 0               | 5               | 0                | -1.8163             |
| 829  | 240913  | Adams4        | a disintegrin-like and metallopeptidase (reprolysin type) with thrombospondin type 1 motif, 4     | 0               | 4               | 1                | -1.81571            |
| 830  | 59056   | Evc           | Ellis van Creveld gene homolog (human)                                                            | 0               | 4               | 1                | -1.81523            |
| 831  | 435267  | UNK           | NA                                                                                                | 0               | 3               | 2                | -1.81449            |
| 832  | 107686  | Snrpd2        | small nuclear ribonucleoprotein D2                                                                | 0               | 3               | 2                | -1.81424            |
| 833  | 11444   | Chrb2         | cholinergic receptor, nicotinic, beta polypeptide 2 (neuronal)                                    | 0               | 4               | 1                | -1.8142             |
| 834  | 13067   | Cyct          | cytochrome c, testis                                                                              | 0               | 3               | 2                | -1.8128             |
| 835  | 244448  | BC050188      | tripartite motif family-like 1                                                                    | 0               | 3               | 2                | -1.81208            |
| 836  | 11852   | Rhob          | ras homolog gene family, member B                                                                 | 0               | 3               | 2                | -1.81154            |
| 837  | 15228   | Foxg1         | forkhead box G1                                                                                   | 0               | 3               | 2                | -1.81141            |
| 838  | 328424  | Kcnrg         | potassium channel regulator                                                                       | 0               | 4               | 1                | -1.81139            |
| 839  | 99296   | Hrh3          | histamine receptor H3                                                                             | 0               | 3               | 2                | -1.8111             |
| 840  | 16447   | Ivl           | involucrin                                                                                        | 0               | 3               | 2                | -1.81092            |
| 841  | 268301  | C820004L04Rik | soseudowah ankyrin repeat domain family member C                                                  | 0               | 5               | 0                | -1.81031            |
| 842  | 26427   | Creb3l1       | cAMP responsive element binding protein 3-like 1                                                  | 0               | 3               | 2                | -1.80939            |
| 843  | 74412   | Gle1l         | GLE1 RNA export mediator (yeast)                                                                  | 0               | 4               | 1                | -1.80752            |
| 844  | 20587   | Smcarb1       | SWI/SNF related, matrix associated, actin dependent regulator of chromatin, subfamily b, member 1 | 0               | 3               | 2                | -1.80697            |
| 845  | 66066   | Gng11         | guanine nucleotide binding protein (G protein), gamma 11                                          | 0               | 3               | 2                | -1.80696            |
| 846  | 18712   | Pim1          | proviral integration site 1                                                                       | 0               | 3               | 2                | -1.80687            |
| 847  | 27369   | Dguok         | deoxyguanosine kinase                                                                             | 0               | 3               | 2                | -1.80642            |

Candidates for positive regulators of normal growth (Fisher's)

| Rank | entrez# | Gene Symbol   | Gene name                                                                                            | enriched shRNAs | depleted shRNAs | no change shRNAs | average Fold Change |
|------|---------|---------------|------------------------------------------------------------------------------------------------------|-----------------|-----------------|------------------|---------------------|
| 848  | 64294   | Iitm2c        | integral membrane protein 2C                                                                         | 0               | 4               | 1                | -1.80584            |
| 849  | 14263   | Fmo5          | flavin containing monooxygenase 5                                                                    | 0               | 3               | 2                | -1.8058             |
| 850  | 12660   | Chka          | choline kinase alpha                                                                                 | 0               | 4               | 1                | -1.80543            |
| 851  | 243834  | Zfp324        | zinc finger protein 324                                                                              | 0               | 3               | 2                | -1.80534            |
| 852  | 17381   | Mmp12         | matrix metalloproteinase 12                                                                          | 0               | 4               | 5                | -1.80503            |
| 853  | 21892   | Tll1          | tolloid-like                                                                                         | 0               | 4               | 1                | -1.80468            |
| 854  | 66513   | Map3k7ip1     | TGF-beta activated kinase 1/MAP3K7 binding protein 1                                                 | 0               | 3               | 2                | -1.80453            |
| 855  | 100647  | Upk3b         | uroplakin 3B                                                                                         | 0               | 3               | 2                | -1.80443            |
| 856  | 75291   | Zbtb3         | zinc finger and BTB domain containing 3                                                              | 0               | 3               | 2                | -1.80373            |
| 857  | 320869  | 4732415M23Rik | RIKEN cDNA 4732415M23 gene                                                                           | 0               | 4               | 0                | -1.80357            |
| 858  | 67974   | 5730405I09Rik | cyclin Y                                                                                             | 0               | 4               | 1                | -1.80332            |
| 859  | 217012  | Unc45b        | unc-45 homolog B (C. elegans)                                                                        | 0               | 3               | 2                | -1.80303            |
| 860  | 26938   | St6galnac5    | ST6 (alpha-N-acetyl-neuraminyl-2,3-beta-galactosyl-1,3)-N-acetylgalactosaminide alpha-2,6-sialyltran | 0               | 3               | 2                | -1.80274            |
| 861  | 269966  | Nup98         | nucleoporin 98                                                                                       | 0               | 4               | 0                | -1.80258            |
| 862  | 142681  | Slc34a3       | solute carrier family 34 (sodium phosphate), member 3                                                | 0               | 3               | 2                | -1.80212            |
| 863  | 269261  | Rpl12         | ribosomal protein L12                                                                                | 0               | 5               | 0                | -1.80186            |
| 864  | 19361   | Rad51         | RAD51 homolog (S. cerevisiae)                                                                        | 0               | 5               | 0                | -1.80057            |
| 865  | 53945   | Slc40a1       | solute carrier family 40 (iron-regulated transporter), member 1                                      | 0               | 3               | 2                | -1.79991            |
| 866  | 213019  | Pdlim2        | PDZ and LIM domain 2                                                                                 | 0               | 3               | 2                | -1.79958            |
| 867  | 56290   | Prp15         | NA                                                                                                   | 0               | 3               | 2                | -1.79914            |
| 868  | 53415   | Htatip2       | HIV-1 tat interactive protein 2, homolog (human)                                                     | 0               | 5               | 0                | -1.79859            |
| 869  | 17695   | Msmb          | beta-microseminoprotein                                                                              | 0               | 4               | 0                | -1.79847            |
| 870  | 14972   | H2-K1         | histocompatibility 2, K1, K region                                                                   | 0               | 3               | 2                | -1.79847            |
| 871  | 70676   | Gulp1         | GULP, engulfment adaptor PTB domain containing 1                                                     | 0               | 3               | 2                | -1.79708            |
| 872  | 54483   | Mefv          | Mediterranean fever                                                                                  | 0               | 3               | 2                | -1.79605            |
| 873  | 50721   | Sirt6         | sirtuin 6 (silent mating type information regulation 2, homolog) 6 (S. cerevisiae)                   | 0               | 3               | 2                | -1.79479            |
| 874  | 26444   | Psma7         | proteasome (prosome, macropain) subunit, alpha type 7                                                | 0               | 3               | 2                | -1.79433            |
| 875  | 19886   | Ros1          | Ros1 proto-oncogene                                                                                  | 0               | 3               | 7                | -1.79425            |
| 876  | 17691   | Snf1k         | salt inducible kinase 1                                                                              | 0               | 4               | 1                | -1.79404            |
| 877  | 238393  | Serpina3f     | serine (or cysteine) peptidase inhibitor, clade A, member 3F                                         | 0               | 4               | 1                | -1.79371            |
| 878  | 18781   | Pla2g2c       | phospholipase A2, group IIC                                                                          | 0               | 3               | 2                | -1.79345            |
| 879  | 18606   | Enpp2         | ectonucleotide pyrophosphatase/phosphodiesterase 2                                                   | 0               | 3               | 2                | -1.79314            |
| 880  | 319655  | Podxl2        | podocalyxin-like 2                                                                                   | 0               | 3               | 2                | -1.79218            |
| 881  | 77976   | Nuak1         | NUAK family, SNF1-like kinase, 1                                                                     | 0               | 4               | 1                | -1.79213            |
| 882  | 28077   | D13Wsu50e     | mediator of RNA polymerase II transcription, subunit 10 homolog (NUT2, S. cerevisiae)                | 0               | 5               | 0                | -1.79008            |
| 883  | 434655  | UNK           | NA                                                                                                   | 0               | 3               | 1                | -1.78974            |
| 884  | 12372   | Casq1         | calsequestrin 1                                                                                      | 0               | 3               | 2                | -1.78957            |

Candidates for positive regulators of normal growth (Fisher's)

| Rank | entrez# | Gene Symbol   | Gene name                                                                         | enriched shRNAs | depleted shRNAs | no change shRNAs | average Fold Change |
|------|---------|---------------|-----------------------------------------------------------------------------------|-----------------|-----------------|------------------|---------------------|
| 885  | 229309  | UNK           | NA                                                                                | 0               | 3               | 2                | -1.78913            |
| 886  | 26946   | Trpc7         | transient receptor potential cation channel, subfamily C, member 7                | 0               | 3               | 2                | -1.78901            |
| 887  | 22361   | Vnn1          | vanin 1                                                                           | 0               | 3               | 2                | -1.78847            |
| 888  | 22282   | Usf2          | upstream transcription factor 2                                                   | 0               | 3               | 2                | -1.78796            |
| 889  | 26992   | Brd7          | bromodomain containing 7                                                          | 0               | 3               | 2                | -1.78756            |
| 890  | 58859   | Efemp2        | epidermal growth factor-containing fibulin-like extracellular matrix protein 2    | 0               | 3               | 2                | -1.78712            |
| 891  | 319520  | Dusp4         | dual specificity phosphatase 4                                                    | 0               | 4               | 1                | -1.78695            |
| 892  | 116810  | Foxn4         | forkhead box N4                                                                   | 0               | 4               | 1                | -1.78666            |
| 893  | 383507  | UNK           | NA                                                                                | 0               | 3               | 2                | -1.78596            |
| 894  | 21678   | Tead3         | TEA domain family member 3                                                        | 0               | 3               | 2                | -1.78449            |
| 895  | 329278  | Tnn           | tenascin N                                                                        | 0               | 3               | 2                | -1.78425            |
| 896  | 21946   | Pglyrp1       | peptidoglycan recognition protein 1                                               | 0               | 4               | 1                | -1.78414            |
| 897  | 18570   | Pdcd6         | programmed cell death 6                                                           | 0               | 3               | 2                | -1.78373            |
| 898  | 235587  | Parp3         | poly (ADP-ribose) polymerase family, member 3                                     | 0               | 3               | 2                | -1.78341            |
| 899  | 65086   | Edg7          | lysophosphatidic acid receptor 3                                                  | 0               | 3               | 2                | -1.78329            |
| 900  | 74335   | Xrcc3         | X-ray repair complementing defective repair in Chinese hamster cells 3            | 0               | 3               | 2                | -1.78325            |
| 901  | 217030  | Ap1gbp1       | synergin, gamma                                                                   | 0               | 3               | 2                | -1.78316            |
| 902  | 67891   | Rpl4          | ribosomal protein L4                                                              | 0               | 5               | 0                | -1.78292            |
| 903  | 100088  | Rcc1          | regulator of chromosome condensation 1                                            | 0               | 3               | 2                | -1.78283            |
| 904  | 14120   | Fbp2          | fructose biphosphatase 2                                                          | 0               | 3               | 2                | -1.78279            |
| 905  | 20863   | Stfa3         | stefin A3                                                                         | 0               | 3               | 2                | -1.78158            |
| 906  | 76943   | 2310020A21Rik | prosaposin-like 1                                                                 | 0               | 3               | 2                | -1.78156            |
| 907  | 12623   | Ces1          | carboxylesterase 1G                                                               | 0               | 3               | 2                | -1.78058            |
| 908  | 106759  | Ticam1        | toll-like receptor adaptor molecule 1                                             | 0               | 3               | 2                | -1.78054            |
| 909  | 214968  | Sema6d        | sema domain, transmembrane domain (TM), and cytoplasmic domain, (semaphorin) 6D   | 0               | 3               | 2                | -1.78029            |
| 910  | 65079   | Rtn4r         | reticulon 4 receptor                                                              | 0               | 4               | 1                | -1.78019            |
| 911  | 380839  | Serpinh1c     | serine (or cysteine) peptidase inhibitor, clade B, member 1c                      | 0               | 3               | 2                | -1.7798             |
| 912  | 22034   | Traf6         | TNF receptor-associated factor 6                                                  | 0               | 3               | 2                | -1.77968            |
| 913  | 16011   | Igfbp5        | insulin-like growth factor binding protein 5                                      | 0               | 3               | 2                | -1.77822            |
| 914  | 194597  | Tmprss11a     | transmembrane protease, serine 11a                                                | 0               | 3               | 2                | -1.77812            |
| 915  | 17152   | Mak           | male germ cell-associated kinase                                                  | 0               | 3               | 1                | -1.77733            |
| 916  | 20302   | Ccl3          | chemokine (C-C motif) ligand 3                                                    | 0               | 3               | 2                | -1.77679            |
| 917  | 109229  | C030004A17Rik | family with sequence similarity 118, member B                                     | 0               | 3               | 2                | -1.7767             |
| 918  | 12983   | Csf2rb1       | colony stimulating factor 2 receptor, beta, low-affinity (granulocyte-macrophage) | 0               | 4               | 1                | -1.77639            |
| 919  | 17535   | Mre11a        | meiotic recombination 11 homolog A (S. cerevisiae)                                | 0               | 4               | 1                | -1.77639            |
| 920  | 13498   | Atn1          | atrophin 1                                                                        | 0               | 3               | 2                | -1.77604            |
| 921  | 26386   | Hsf4          | heat shock transcription factor 4                                                 | 0               | 5               | 0                | -1.77597            |

Candidates for positive regulators of normal growth (Fisher's)

| Rank | entrez# | Gene Symbol   | Gene name                                                                          | enriched shRNAs | depleted shRNAs | no change shRNAs | average Fold Change |
|------|---------|---------------|------------------------------------------------------------------------------------|-----------------|-----------------|------------------|---------------------|
| 922  | 18317   | Olf2          | olfactory receptor 2                                                               | 0               | 3               | 2                | -1.77557            |
| 923  | 74277   | Chic2         | cysteine-rich hydrophobic domain 2                                                 | 0               | 4               | 1                | -1.77555            |
| 924  | 217337  | Srp68         | signal recognition particle 68                                                     | 0               | 4               | 1                | -1.77521            |
| 925  | 114584  | Clic1         | chloride intracellular channel 1                                                   | 0               | 3               | 2                | -1.77494            |
| 926  | 15229   | Foxd1         | forkhead box D1                                                                    | 0               | 4               | 0                | -1.77471            |
| 927  | 214531  | Tmprss13      | transmembrane protease, serine 13                                                  | 0               | 3               | 2                | -1.77454            |
| 928  | 13842   | Epha8         | Eph receptor A8                                                                    | 0               | 3               | 2                | -1.77417            |
| 929  | 56418   | Ykt6          | YKT6 homolog (S. Cerevisiae)                                                       | 0               | 3               | 2                | -1.77399            |
| 930  | 216516  | 4930562D19Rik | coiled-coil domain containing 157                                                  | 0               | 3               | 1                | -1.77381            |
| 931  | 209378  | Itih5         | inter-alpha (globulin) inhibitor H5                                                | 0               | 3               | 2                | -1.77341            |
| 932  | 17261   | Mef2d         | myocyte enhancer factor 2D                                                         | 0               | 3               | 2                | -1.77198            |
| 933  | 226040  | E030010A14Rik | RIKEN cDNA E030010A14 gene                                                         | 0               | 3               | 2                | -1.77141            |
| 934  | 68401   | G6pc3         | glucose 6 phosphatase, catalytic, 3                                                | 0               | 3               | 2                | -1.77108            |
| 935  | 68777   | Tmem53        | transmembrane protein 53                                                           | 0               | 3               | 1                | -1.77096            |
| 936  | 71988   | Esco2         | establishment of cohesion 1 homolog 2 (S. cerevisiae)                              | 0               | 3               | 2                | -1.77091            |
| 937  | 26942   | Spag1         | sperm associated antigen 1                                                         | 0               | 3               | 2                | -1.76982            |
| 938  | 320995  | Rfxdc1        | regulatory factor X, 6                                                             | 0               | 3               | 2                | -1.76912            |
| 939  | 18148   | Npm1          | nucleophosmin 1                                                                    | 0               | 3               | 2                | -1.76877            |
| 940  | 59024   | Med12         | mediator of RNA polymerase II transcription, subunit 12 homolog (yeast)            | 0               | 4               | 1                | -1.76845            |
| 941  | 76646   | 1700123D08Rik | WD repeat domain 38                                                                | 0               | 3               | 1                | -1.76746            |
| 942  | 16797   | Lat           | linker for activation of T cells                                                   | 0               | 3               | 2                | -1.76661            |
| 943  | 381113  | Cdkl4         | cyclin-dependent kinase-like 4                                                     | 0               | 4               | 1                | -1.76553            |
| 944  | 320581  | 4833405L16Rik | isopentenyl-diphosphate delta isomerase 2                                          | 0               | 3               | 2                | -1.76452            |
| 945  | 21784   | Tff1          | trefoil factor 1                                                                   | 0               | 3               | 2                | -1.76447            |
| 946  | 108097  | Prkab2        | protein kinase, AMP-activated, beta 2 non-catalytic subunit                        | 0               | 3               | 2                | -1.76329            |
| 947  | 56856   | Insm2         | insulinoma-associated 2                                                            | 0               | 3               | 2                | -1.76235            |
| 948  | 17826   | Mtvr2         | family with sequence similarity 89, member B                                       | 0               | 3               | 2                | -1.76213            |
| 949  | 52513   | Ddx56         | DEAD (Asp-Glu-Ala-Asp) box polypeptide 56                                          | 0               | 3               | 2                | -1.762              |
| 950  | 99045   | Mrps26        | mitochondrial ribosomal protein S26                                                | 0               | 4               | 1                | -1.76157            |
| 951  | 14148   | Fdx1          | ferredoxin 1                                                                       | 0               | 4               | 1                | -1.76147            |
| 952  | 19982   | Rpl36a        | ribosomal protein L36A                                                             | 0               | 3               | 2                | -1.76136            |
| 953  | 380768  | Gm1568        | predicted gene 1568                                                                | 0               | 3               | 1                | -1.76113            |
| 954  | 78891   | Scy1          | SCY1-like 1 (S. cerevisiae)                                                        | 0               | 3               | 1                | -1.76099            |
| 955  | 71111   | Gpr39         | G protein-coupled receptor 39                                                      | 0               | 4               | 1                | -1.76096            |
| 956  | 217995  | Heatr1        | HEAT repeat containing 1                                                           | 0               | 4               | 0                | -1.76036            |
| 957  | 108147  | Atic          | 5-aminoimidazole-4-carboxamide ribonucleotide formyltransferase/IMP cyclohydrolase | 0               | 4               | 1                | -1.75988            |
| 958  | 20818   | Srprb         | signal recognition particle receptor, B subunit                                    | 0               | 3               | 2                | -1.75987            |

Candidates for positive regulators of normal growth (Fisher's)

| Rank | entrez# | Gene Symbol   | Gene name                                                           | enriched shRNAs | depleted shRNAs | no change shRNAs | average Fold Change |
|------|---------|---------------|---------------------------------------------------------------------|-----------------|-----------------|------------------|---------------------|
| 959  | 70616   | Sf4           | SURP and G patch domain containing 1                                | 0               | 5               | 0                | -1.75914            |
| 960  | 73804   | Kif2c         | kinesin family member 2C                                            | 0               | 3               | 2                | -1.75911            |
| 961  | 13134   | Dach1         | dachshund 1 (Drosophila)                                            | 0               | 4               | 1                | -1.75896            |
| 962  | 78634   | 1700094C09Rik | sperm acrosome associated 7                                         | 0               | 3               | 2                | -1.75763            |
| 963  | 194952  | Jmjd4         | jumonji domain containing 4                                         | 0               | 3               | 2                | -1.75755            |
| 964  | 17191   | Mbd2          | methyl-CpG binding domain protein 2                                 | 0               | 3               | 2                | -1.75685            |
| 965  | 140887  | LnX2          | ligand of numb-protein X 2                                          | 0               | 3               | 2                | -1.75656            |
| 966  | 11435   | Chrna1        | cholinergic receptor, nicotinic, alpha polypeptide 1 (muscle)       | 0               | 3               | 2                | -1.75642            |
| 967  | 12181   | Bop1          | block of proliferation 1                                            | 0               | 5               | 0                | -1.75547            |
| 968  | 264895  | BC018371      | acyl-CoA synthetase family member 2                                 | 0               | 3               | 2                | -1.7543             |
| 969  | 13615   | Edn2          | endothelin 2                                                        | 0               | 3               | 2                | -1.75413            |
| 970  | 51801   | Ramp1         | receptor (calcitonin) activity modifying protein 1                  | 0               | 3               | 2                | -1.75367            |
| 971  | 268294  | Zbtb24        | zinc finger and BTB domain containing 24                            | 0               | 3               | 2                | -1.75312            |
| 972  | 20054   | Rps15         | ribosomal protein S15                                               | 0               | 5               | 0                | -1.75298            |
| 973  | 56289   | Rassf1        | Ras association (RalGDS/AF-6) domain family member 1                | 0               | 5               | 0                | -1.7522             |
| 974  | 13393   | Dlx3          | distal-less homeobox 3                                              | 0               | 5               | 0                | -1.75207            |
| 975  | 70839   | P2ry12        | purinergic receptor P2Y, G-protein coupled 12                       | 0               | 3               | 2                | -1.75186            |
| 976  | 26440   | Psma1         | proteasome (prosome, macropain) subunit, alpha type 1               | 0               | 3               | 2                | -1.75098            |
| 977  | 64660   | Mrps24        | mitochondrial ribosomal protein S24                                 | 0               | 4               | 1                | -1.75091            |
| 978  | 21846   | Tie1          | tyrosine kinase with immunoglobulin-like and EGF-like domains 1     | 0               | 3               | 2                | -1.74924            |
| 979  | 18599   | Padi1         | peptidyl arginine deiminase, type I                                 | 0               | 3               | 2                | -1.74891            |
| 980  | 19344   | Rab5b         | RAB5B, member RAS oncogene family                                   | 0               | 4               | 1                | -1.74854            |
| 981  | 243529  | H1fx          | H1 histone family, member X                                         | 0               | 3               | 2                | -1.74751            |
| 982  | 211924  | Dsg1c         | desmoglein 1 gamma                                                  | 0               | 3               | 2                | -1.74731            |
| 983  | 68272   | Rbm28         | RNA binding motif protein 28                                        | 0               | 3               | 2                | -1.74716            |
| 984  | 404473  | Olf1082       | olfactory receptor 1082                                             | 0               | 3               | 1                | -1.74697            |
| 985  | 23966   | Odz4          | odd Oz/ten-m homolog 4 (Drosophila)                                 | 0               | 3               | 2                | -1.74673            |
| 986  | 17979   | Ncoa3         | nuclear receptor coactivator 3                                      | 0               | 4               | 1                | -1.74585            |
| 987  | 56188   | Fxyd1         | FXYP domain-containing ion transport regulator 1                    | 0               | 3               | 2                | -1.74542            |
| 988  | 234582  | Ccdc102a      | coiled-coil domain containing 102A                                  | 0               | 3               | 2                | -1.74532            |
| 989  | 228787  | Xkr7          | X Kell blood group precursor related family member 7 homolog        | 0               | 3               | 2                | -1.74518            |
| 990  | 14585   | Gfra1         | glial cell line derived neurotrophic factor family receptor alpha 1 | 0               | 3               | 2                | -1.74504            |
| 991  | 231002  | Plekhn1       | pleckstrin homology domain containing, family N member 1            | 0               | 3               | 2                | -1.74503            |
| 992  | 17938   | Naca          | nascent polypeptide-associated complex alpha polypeptide            | 0               | 4               | 1                | -1.74487            |
| 993  | 66258   | Mrps17        | mitochondrial ribosomal protein S17                                 | 0               | 3               | 2                | -1.74357            |
| 994  | 21885   | Tie1          | transducin-like enhancer of split 1, homolog of Drosophila E(spl)   | 0               | 5               | 0                | -1.7434             |
| 995  | 385356  | LOC385356     | actin, gamma, cytoplasmic 1 pseudogene                              | 0               | 3               | 2                | -1.74297            |

Candidates for positive regulators of normal growth (Fisher's)

| Rank | entrez# | Gene Symbol   | Gene name                                                            | enriched shRNAs | depleted shRNAs | no change shRNAs | average Fold Change |
|------|---------|---------------|----------------------------------------------------------------------|-----------------|-----------------|------------------|---------------------|
| 996  | 68038   | 3110023E09Rik | chitinase domain containing 1                                        | 0               | 3               | 1                | -1.74149            |
| 997  | 18821   | Pln           | phospholamban                                                        | 0               | 4               | 1                | -1.74108            |
| 998  | 381075  | Gm936         | NA                                                                   | 0               | 3               | 2                | -1.74103            |
| 999  | 11603   | Agrn          | agrin                                                                | 0               | 4               | 1                | -1.74095            |
| 1000 | 104479  | BC018601      | coiled-coil domain containing 117                                    | 0               | 3               | 1                | -1.74013            |
| 1001 | 327956  | Vmo1          | vitelline membrane outer layer 1 homolog (chicken)                   | 0               | 3               | 2                | -1.73947            |
| 1002 | 231863  | Fbx18         | F-box and leucine-rich repeat protein 18                             | 0               | 3               | 2                | -1.73907            |
| 1003 | 19378   | Aldh1a2       | aldehyde dehydrogenase family 1, subfamily A2                        | 0               | 4               | 0                | -1.73799            |
| 1004 | 75497   | 1700008G05Rik | fatty acid binding protein 12                                        | 0               | 3               | 2                | -1.73781            |
| 1005 | 12467   | Cct6b         | chaperonin containing Tcp1, subunit 6b (zeta)                        | 0               | 3               | 2                | -1.73778            |
| 1006 | 227715  | Exosc2        | exosome component 2                                                  | 0               | 4               | 1                | -1.73716            |
| 1007 | 93898   | Lass1         | LAG1 homolog, ceramide synthase 1                                    | 0               | 3               | 2                | -1.73707            |
| 1008 | 224836  | Usp49         | ubiquitin specific peptidase 49                                      | 0               | 4               | 1                | -1.73683            |
| 1009 | 68183   | Bcas2         | breast carcinoma amplified sequence 2                                | 0               | 3               | 2                | -1.73675            |
| 1010 | 69833   | Polr2f        | polymerase (RNA) II (DNA directed) polypeptide F                     | 0               | 3               | 2                | -1.73666            |
| 1011 | 13046   | Cugbp1        | CUGBP, Elav-like family member 1                                     | 0               | 3               | 2                | -1.73653            |
| 1012 | 380676  | Gm1872        | NA                                                                   | 0               | 4               | 1                | -1.73641            |
| 1013 | 75212   | Rnf121        | ring finger protein 121                                              | 0               | 3               | 2                | -1.73566            |
| 1014 | 11642   | Akap3         | A kinase (PRKA) anchor protein 3                                     | 0               | 3               | 2                | -1.73565            |
| 1015 | 110648  | Lmx1a         | LIM homeobox transcription factor 1 alpha                            | 0               | 4               | 1                | -1.73547            |
| 1016 | 17222   | Anapc1        | anaphase promoting complex subunit 1                                 | 0               | 4               | 1                | -1.73532            |
| 1017 | 208372  | Asb18         | ankyrin repeat and SOCS box-containing 18                            | 0               | 3               | 2                | -1.73506            |
| 1018 | 237958  | 4933407P14Rik | RIKEN cDNA 4933407P14 gene                                           | 0               | 4               | 1                | -1.73506            |
| 1019 | 170759  | Atp13a1       | ATPase type 13A1                                                     | 0               | 3               | 2                | -1.73489            |
| 1020 | 16419   | Itgb5         | integrin beta 5                                                      | 0               | 4               | 1                | -1.73471            |
| 1021 | 75608   | Chmp4b        | charged multivesicular body protein 4B                               | 0               | 3               | 2                | -1.73467            |
| 1022 | 103149  | Upb1          | ureidopropionase, beta                                               | 0               | 3               | 2                | -1.73441            |
| 1023 | 11475   | Acta2         | actin, alpha 2, smooth muscle, aorta                                 | 0               | 3               | 2                | -1.7343             |
| 1024 | 21958   | Tnp1          | transition protein 1                                                 | 0               | 3               | 2                | -1.73412            |
| 1025 | 18974   | Pole2         | polymerase (DNA directed), epsilon 2 (p59 subunit)                   | 0               | 3               | 2                | -1.73405            |
| 1026 | 70425   | Csnk1g3       | casein kinase 1, gamma 3                                             | 0               | 3               | 2                | -1.73334            |
| 1027 | 106877  | Al173486      | actin filament associated protein 1-like 1                           | 0               | 4               | 1                | -1.73282            |
| 1028 | 435625  | UNK           | NA                                                                   | 0               | 4               | 1                | -1.73229            |
| 1029 | 66585   | Wdr57         | small nuclear ribonucleoprotein 40 (U5)                              | 0               | 3               | 2                | -1.73209            |
| 1030 | 22215   | Ube3a         | ubiquitin protein ligase E3A                                         | 0               | 3               | 2                | -1.73127            |
| 1031 | 170738  | Kcnh7         | potassium voltage-gated channel, subfamily H (eag-related), member 7 | 0               | 3               | 2                | -1.73099            |
| 1032 | 20878   | Aurka         | aurora kinase A                                                      | 0               | 3               | 2                | -1.7309             |

Candidates for positive regulators of normal growth (Fisher's)

| Rank | entrez# | Gene Symbol   | Gene name                                                                   | enriched shRNAs | depleted shRNAs | no change shRNAs | average Fold Change |
|------|---------|---------------|-----------------------------------------------------------------------------|-----------------|-----------------|------------------|---------------------|
| 1033 | 74074   | 4933405I11Rik | NA                                                                          | 0               | 3               | 2                | -1.73072            |
| 1034 | 67425   | Eps8l1        | EPS8-like 1                                                                 | 0               | 3               | 2                | -1.73048            |
| 1035 | 113855  | V1rb7         | vomeronasal 1 receptor 40                                                   | 0               | 3               | 2                | -1.73009            |
| 1036 | 13388   | Dll1          | delta-like 1 (Drosophila)                                                   | 0               | 3               | 2                | -1.72959            |
| 1037 | 73390   | 1700060H10Rik | male-specific lethal 3-like 2 (Drosophila)                                  | 0               | 3               | 2                | -1.72913            |
| 1038 | 381937  | LOC381937     | predicted gene 5157                                                         | 0               | 3               | 2                | -1.72913            |
| 1039 | 243764  | Chrm2         | cholinergic receptor, muscarinic 2, cardiac                                 | 0               | 4               | 1                | -1.729              |
| 1040 | 64074   | Smoc2         | SPARC related modular calcium binding 2                                     | 0               | 3               | 2                | -1.72868            |
| 1041 | 20907   | Stx1a         | syntaxin 1A (brain)                                                         | 0               | 3               | 2                | -1.72867            |
| 1042 | 18710   | Pik3r3        | phosphatidylinositol 3 kinase, regulatory subunit, polypeptide 3 (p55)      | 0               | 3               | 2                | -1.72744            |
| 1043 | 17180   | Matn1         | matrilin 1, cartilage matrix protein                                        | 0               | 3               | 2                | -1.72743            |
| 1044 | 13821   | Epb4.111      | erythrocyte protein band 4.1-like 1                                         | 0               | 3               | 2                | -1.72715            |
| 1045 | 66322   | 1700011A15Rik | RIKEN cDNA 1700011A15 gene                                                  | 0               | 3               | 2                | -1.72692            |
| 1046 | 237934  | 4732494G06Rik | keratin 39                                                                  | 0               | 3               | 2                | -1.72681            |
| 1047 | 19894   | Rph3a         | rabphilin 3A                                                                | 0               | 3               | 2                | -1.72618            |
| 1048 | 22123   | Psmc3         | proteasome (prosome, macropain) 26S subunit, non-ATPase, 3                  | 0               | 3               | 2                | -1.72567            |
| 1049 | 72155   | 2610510J17Rik | centromere protein N                                                        | 0               | 3               | 1                | -1.7256             |
| 1050 | 22401   | Wig1          | zinc finger matrin type 3                                                   | 0               | 3               | 2                | -1.7251             |
| 1051 | 12994   | Csnk          | casein kappa                                                                | 0               | 3               | 1                | -1.72477            |
| 1052 | 14735   | Gpc4          | glypican 4                                                                  | 0               | 3               | 2                | -1.72415            |
| 1053 | 13801   | Enam          | enamelin                                                                    | 0               | 3               | 2                | -1.72403            |
| 1054 | 105348  | Golph2        | golgi membrane protein 1                                                    | 0               | 3               | 2                | -1.72358            |
| 1055 | 13476   | Reep5         | receptor accessory protein 5                                                | 0               | 3               | 2                | -1.72356            |
| 1056 | 17347   | Mknk2         | MAP kinase-interacting serine/threonine kinase 2                            | 0               | 3               | 2                | -1.7232             |
| 1057 | 433406  | LOC433406     | predicted gene 13363                                                        | 0               | 4               | 1                | -1.72291            |
| 1058 | 52440   | Tax1bp1       | Tax1 (human T cell leukemia virus type I) binding protein 1                 | 0               | 3               | 2                | -1.72283            |
| 1059 | 22230   | Ufd1l         | ubiquitin fusion degradation 1 like                                         | 0               | 3               | 2                | -1.72276            |
| 1060 | 12683   | Cidea         | cell death-inducing DNA fragmentation factor, alpha subunit-like effector A | 0               | 3               | 1                | -1.72262            |
| 1061 | 14427   | Galr1         | galanin receptor 1                                                          | 0               | 3               | 2                | -1.72244            |
| 1062 | 229049  | 1700003N22Rik | NA                                                                          | 0               | 4               | 1                | -1.72172            |
| 1063 | 20526   | Slc2a2        | solute carrier family 2 (facilitated glucose transporter), member 2         | 0               | 3               | 2                | -1.72164            |
| 1064 | 224630  | Bnip1         | BCL2/adenovirus E1B interacting protein 1                                   | 0               | 3               | 2                | -1.72153            |
| 1065 | 66071   | Eth1          | ethylmalonic encephalopathy 1                                               | 0               | 3               | 2                | -1.72093            |
| 1066 | 72440   | 5930416I19Rik | RIKEN cDNA 5930416I19 gene                                                  | 0               | 3               | 2                | -1.7204             |
| 1067 | 67405   | Nts           | neurotensin                                                                 | 0               | 3               | 2                | -1.72008            |
| 1068 | 14043   | Ext2          | exostososes (multiple) 2                                                    | 0               | 3               | 2                | -1.72007            |
| 1069 | 72508   | Rps6kb1       | ribosomal protein S6 kinase, polypeptide 1                                  | 0               | 3               | 2                | -1.7199             |



Candidates for positive regulators of normal growth (Fisher's)

| Rank | entrez# | Gene Symbol   | Gene name                                                                | enriched shRNAs | depleted shRNAs | no change shRNAs | average Fold Change |
|------|---------|---------------|--------------------------------------------------------------------------|-----------------|-----------------|------------------|---------------------|
| 1070 | 432889  | UNK           | NA                                                                       | 0               | 3               | 2                | -1.71957            |
| 1071 | 71911   | Bdh1          | 3-hydroxybutyrate dehydrogenase, type 1                                  | 0               | 3               | 2                | -1.71936            |
| 1072 | 217845  | 1810023F06Rik | interferon, alpha-inducible protein 27 like 2B                           | 0               | 3               | 2                | -1.71836            |
| 1073 | 20264   | Scn10a        | sodium channel, voltage-gated, type X, alpha                             | 0               | 3               | 2                | -1.71787            |
| 1074 | 11513   | Adcy7         | adenylate cyclase 7                                                      | 0               | 3               | 2                | -1.71745            |
| 1075 | 18431   | p             | oculocutaneous albinism II                                               | 0               | 4               | 1                | -1.71725            |
| 1076 | 380655  | UNK           | NA                                                                       | 0               | 4               | 1                | -1.71715            |
| 1077 | 66713   | Actr2         | ARP2 actin-related protein 2 homolog (yeast)                             | 0               | 4               | 1                | -1.71686            |
| 1078 | 19275   | Ptpn          | protein tyrosine phosphatase, receptor type, N                           | 0               | 4               | 1                | -1.71648            |
| 1079 | 170828  | Vgll1         | vestigial like 1 homolog (Drosophila)                                    | 0               | 3               | 2                | -1.71646            |
| 1080 | 67623   | Tm7sf3        | transmembrane 7 superfamily member 3                                     | 0               | 3               | 2                | -1.71606            |
| 1081 | 16658   | Mafb          | v-maf musculoaponeurotic fibrosarcoma oncogene family, protein B (avian) | 0               | 4               | 1                | -1.71515            |
| 1082 | 381680  | BC055004      | cDNA sequence BC055004                                                   | 0               | 4               | 1                | -1.71383            |
| 1083 | 65107   | Lrp10         | low-density lipoprotein receptor-related protein 10                      | 0               | 3               | 2                | -1.71325            |
| 1084 | 18636   | Cfp           | complement factor properdin                                              | 0               | 3               | 1                | -1.7131             |
| 1085 | 232969  | 2410005H09Rik | zinc finger protein 428                                                  | 0               | 3               | 1                | -1.71285            |
| 1086 | 16518   | Kcnj2         | potassium inwardly-rectifying channel, subfamily J, member 2             | 0               | 4               | 1                | -1.71225            |
| 1087 | 258718  | Olf1513       | olfactory receptor 513                                                   | 0               | 3               | 1                | -1.71119            |
| 1088 | 269254  | Als4          | senataxin                                                                | 0               | 3               | 2                | -1.71102            |
| 1089 | 16323   | Inhba         | inhibin beta-A                                                           | 0               | 3               | 2                | -1.7105             |
| 1090 | 320407  | Klri2         | killer cell lectin-like receptor family I member 2                       | 0               | 3               | 2                | -1.71044            |
| 1091 | 15191   | Hdgf          | hepatoma-derived growth factor                                           | 0               | 3               | 2                | -1.71023            |
| 1092 | 259300  | Ehd2          | EH-domain containing 2                                                   | 0               | 3               | 2                | -1.7091             |
| 1093 | 229228  | Nudt6         | nudix (nucleoside diphosphate linked moiety X)-type motif 6              | 0               | 3               | 2                | -1.7091             |
| 1094 | 330731  | LOC330731     | trimethylguanosine synthase homolog pseudogene                           | 0               | 3               | 2                | -1.70866            |
| 1095 | 16498   | Kcnab2        | potassium voltage-gated channel, shaker-related subfamily, beta member 2 | 0               | 3               | 2                | -1.70777            |
| 1096 | 432738  | UNK           | NA                                                                       | 0               | 3               | 2                | -1.70738            |
| 1097 | 73473   | Iws1          | IWS1 homolog (S. cerevisiae)                                             | 0               | 4               | 1                | -1.70718            |
| 1098 | 74340   | 4631427C17Rik | S-adenosylhomocysteine hydrolase-like 2                                  | 0               | 3               | 2                | -1.70663            |
| 1099 | 317717  | Sec22a        | SEC22 vesicle trafficking protein homologue A (S. cerevisiae)            | 0               | 3               | 2                | -1.70639            |
| 1100 | 56420   | Ppp4c         | protein phosphatase 4, catalytic subunit                                 | 0               | 3               | 2                | -1.70636            |
| 1101 | 67205   | Utp11l        | UTP11-like, U3 small nucleolar ribonucleoprotein, (yeast)                | 0               | 3               | 2                | -1.70634            |
| 1102 | 68572   | Ict1          | immature colon carcinoma transcript 1                                    | 0               | 3               | 1                | -1.70615            |
| 1103 | 83383   | Tcfap4        | transcription factor AP4                                                 | 0               | 3               | 2                | -1.70585            |
| 1104 | 70427   | Mier2         | mesoderm induction early response 1, family member 2                     | 0               | 3               | 2                | -1.70571            |
| 1105 | 219134  | Tmem46        | shisa homolog 2 (Xenopus laevis)                                         | 0               | 3               | 2                | -1.70481            |
| 1106 | 54672   | Gpr97         | G protein-coupled receptor 97                                            | 0               | 3               | 2                | -1.70471            |

Candidates for positive regulators of normal growth (Fisher's)

| Rank | entrez# | Gene Symbol          | Gene name                                                     | enriched shRNAs | depleted shRNAs | no change shRNAs | average Fold Change |
|------|---------|----------------------|---------------------------------------------------------------|-----------------|-----------------|------------------|---------------------|
| 1107 | 226982  | Elf5b                | eukaryotic translation initiation factor 5B                   | 0               | 4               | 0                | -1.70451            |
| 1108 | 257662  | GA-x5J8B7W4T2P-84764 | olfactory receptor 1290                                       | 0               | 3               | 2                | -1.70448            |
| 1109 | 84092   | Usp8                 | ubiquitin specific peptidase 8                                | 0               | 3               | 2                | -1.70441            |
| 1110 | 67016   | Tbc1d2b              | TBC1 domain family, member 2B                                 | 0               | 3               | 2                | -1.70414            |
| 1111 | 69577   | 2310010B21Rik        | FAST kinase domains 3                                         | 0               | 3               | 1                | -1.7038             |
| 1112 | 110596  | Rgnef                | Rho-guanine nucleotide exchange factor                        | 0               | 4               | 1                | -1.70277            |
| 1113 | 76932   | Arfp2                | ADP-ribosylation factor interacting protein 2                 | 0               | 4               | 1                | -1.70276            |
| 1114 | 21922   | Clec3b               | C-type lectin domain family 3, member b                       | 0               | 4               | 1                | -1.70209            |
| 1115 | 14055   | Ezh1                 | enhancer of zeste homolog 1 (Drosophila)                      | 0               | 3               | 2                | -1.70205            |
| 1116 | 22352   | Vim                  | vimentin                                                      | 0               | 3               | 2                | -1.70191            |
| 1117 | 11703   | Amd2                 | NA                                                            | 0               | 3               | 2                | -1.70134            |
| 1118 | 68416   | Sycn                 | syncollin                                                     | 0               | 4               | 1                | -1.70073            |
| 1119 | 235345  | 4833427G06Rik        | RIKEN cDNA 4833427G06 gene                                    | 0               | 3               | 2                | -1.7007             |
| 1120 | 223978  | C530044N13Rik        | calcineurin-like phosphoesterase domain containing 1          | 0               | 3               | 2                | -1.70062            |
| 1121 | 116849  | Il1f1b               | interleukin 10-related T cell-derived inducible factor beta   | 0               | 4               | 1                | -1.69984            |
| 1122 | 258939  | Olf63                | olfactory receptor 63                                         | 0               | 3               | 1                | -1.69983            |
| 1123 | 23795   | Agr2                 | anterior gradient 2 (Xenopus laevis)                          | 0               | 3               | 2                | -1.69977            |
| 1124 | 72119   | Tpx2                 | TPX2, microtubule-associated protein homolog (Xenopus laevis) | 0               | 5               | 0                | -1.69937            |
| 1125 | 69150   | Snx4                 | sorting nexin 4                                               | 0               | 4               | 1                | -1.69874            |
| 1126 | 237016  | LOC237016            | pyruvate kinase, muscle pseudogene                            | 0               | 3               | 2                | -1.69852            |
| 1127 | 12661   | Chl1                 | cell adhesion molecule with homology to L1CAM                 | 0               | 4               | 1                | -1.69814            |
| 1128 | 215472  | E130012K09           | predicted gene 4792                                           | 0               | 4               | 0                | -1.69796            |
| 1129 | 17936   | Nab1                 | Ngfi-A binding protein 1                                      | 0               | 3               | 2                | -1.69785            |
| 1130 | 22044   | Trh                  | thyrotropin releasing hormone                                 | 0               | 4               | 1                | -1.69756            |
| 1131 | 66438   | Hamp2                | hepcidin antimicrobial peptide 2                              | 0               | 4               | 1                | -1.69727            |
| 1132 | 19072   | Prep                 | prolyl endopeptidase                                          | 0               | 4               | 1                | -1.69718            |
| 1133 | 14201   | Fhl3                 | four and a half LIM domains 3                                 | 0               | 3               | 2                | -1.69718            |
| 1134 | 68614   | Letmd1               | LETM1 domain containing 1                                     | 0               | 3               | 2                | -1.69627            |
| 1135 | 66090   | Ypel3                | yippee-like 3 (Drosophila)                                    | 0               | 3               | 1                | -1.69611            |
| 1136 | 56427   | Tubd1                | tubulin, delta 1                                              | 0               | 3               | 2                | -1.69527            |
| 1137 | 192653  | BC021608             | tetratricopeptide repeat domain 36                            | 0               | 3               | 2                | -1.69522            |
| 1138 | 15139   | Hc                   | hemolytic complement                                          | 0               | 3               | 2                | -1.69514            |
| 1139 | 17972   | Ncf4                 | neutrophil cytosolic factor 4                                 | 0               | 3               | 2                | -1.69478            |
| 1140 | 66922   | Rras2                | related RAS viral (r-ras) oncogene homolog 2                  | 0               | 4               | 1                | -1.69478            |
| 1141 | 19226   | Pth                  | parathyroid hormone                                           | 0               | 3               | 2                | -1.69462            |
| 1142 | 231474  | Paqr3                | progesterin and adipoQ receptor family member III             | 0               | 3               | 2                | -1.69444            |
| 1143 | 101314  | 6720456B07Rik        | RIKEN cDNA 6720456B07 gene                                    | 0               | 3               | 2                | -1.69421            |

Candidates for positive regulators of normal growth (Fisher's)

| Rank | entrez# | Gene Symbol   | Gene name                                                               | enriched shRNAs | depleted shRNAs | no change shRNAs | average Fold Change |
|------|---------|---------------|-------------------------------------------------------------------------|-----------------|-----------------|------------------|---------------------|
| 1144 | 56395   | Tmem115       | transmembrane protein 115                                               | 0               | 3               | 2                | -1.69401            |
| 1145 | 11542   | Adora3        | adenosine A3 receptor                                                   | 0               | 3               | 2                | -1.69391            |
| 1146 | 67866   | Wfdc1         | WAP four-disulfide core domain 1                                        | 0               | 3               | 2                | -1.69351            |
| 1147 | 245050  | C730027P07Rik | family with sequence similarity 198, member A                           | 0               | 4               | 0                | -1.69328            |
| 1148 | 333669  | LOC333669     | predicted gene 5134                                                     | 0               | 3               | 2                | -1.69311            |
| 1149 | 107449  | Unc5b         | unc-5 homolog B (C. elegans)                                            | 0               | 3               | 2                | -1.69248            |
| 1150 | 268759  | 9930012K11Rik | RIKEN cDNA 9930012K11 gene                                              | 0               | 3               | 2                | -1.69226            |
| 1151 | 13644   | Efs           | embryonal Fyn-associated substrate                                      | 0               | 3               | 2                | -1.6921             |
| 1152 | 226122  | Ubt1          | ubiquitin domain containing 1                                           | 0               | 3               | 1                | -1.692              |
| 1153 | 16173   | Il18          | interleukin 18                                                          | 0               | 3               | 2                | -1.69195            |
| 1154 | 17898   | Myl7          | myosin, light polypeptide 7, regulatory                                 | 0               | 3               | 2                | -1.69189            |
| 1155 | 545471  | LOC545471     | zinc finger protein 345                                                 | 0               | 3               | 1                | -1.69036            |
| 1156 | 14969   | H2-Eb1        | histocompatibility 2, class II antigen E beta                           | 0               | 3               | 2                | -1.6903             |
| 1157 | 213550  | AV340375      | DIS3 mitotic control homolog (S. cerevisiae)-like                       | 0               | 3               | 1                | -1.68951            |
| 1158 | 13629   | Eef2          | eukaryotic translation elongation factor 2                              | 0               | 3               | 2                | -1.68945            |
| 1159 | 18972   | Pold2         | polymerase (DNA directed), delta 2, regulatory subunit                  | 0               | 3               | 2                | -1.68942            |
| 1160 | 71950   | Nanog         | Nanog homeobox                                                          | 0               | 3               | 2                | -1.68865            |
| 1161 | 258503  | Olf98         | olfactory receptor 98                                                   | 0               | 3               | 2                | -1.68819            |
| 1162 | 56636   | Fgf21         | fibroblast growth factor 21                                             | 0               | 4               | 1                | -1.68815            |
| 1163 | 18511   | Pax9          | paired box gene 9                                                       | 0               | 3               | 2                | -1.68812            |
| 1164 | 12514   | Cd68          | CD68 antigen                                                            | 0               | 3               | 7                | -1.68805            |
| 1165 | 20085   | Rps19         | ribosomal protein S19                                                   | 0               | 4               | 1                | -1.68721            |
| 1166 | 67618   | Aasdhpt       | aminoadipate-semialdehyde dehydrogenase-phosphopantetheinyl transferase | 0               | 3               | 2                | -1.68718            |
| 1167 | 70835   | Prss22        | protease, serine, 22                                                    | 0               | 3               | 1                | -1.6871             |
| 1168 | 26364   | Cd97          | CD97 antigen                                                            | 0               | 3               | 2                | -1.68692            |
| 1169 | 243813  | Leng9         | leukocyte receptor cluster (LRC) member 9                               | 0               | 3               | 2                | -1.68652            |
| 1170 | 75586   | 2310040M23Rik | keratin associated protein 9-3                                          | 0               | 3               | 1                | -1.68619            |
| 1171 | 73716   | Krtap21-1     | NA                                                                      | 0               | 3               | 1                | -1.68601            |
| 1172 | 72727   | B3gat3        | beta-1,3-glucuronyltransferase 3 (glucuronosyltransferase I)            | 0               | 3               | 2                | -1.68569            |
| 1173 | 13386   | Dlk1          | delta-like 1 homolog (Drosophila)                                       | 0               | 3               | 2                | -1.6852             |
| 1174 | 21415   | Tcf3          | transcription factor 7 like 1 (T cell specific, HMG box)                | 0               | 3               | 2                | -1.68505            |
| 1175 | 74387   | 4932438H23Rik | RIKEN cDNA 4932438H23 gene                                              | 0               | 3               | 1                | -1.685              |
| 1176 | 72560   | Naalad2       | N-acetylated alpha-linked acidic dipeptidase 2                          | 0               | 3               | 2                | -1.68439            |
| 1177 | 19206   | Ptch1         | patched homolog 1                                                       | 0               | 3               | 2                | -1.68404            |
| 1178 | 17221   | Cd46          | CD46 antigen, complement regulatory protein                             | 0               | 3               | 2                | -1.6838             |
| 1179 | 74481   | Batf2         | basic leucine zipper transcription factor, ATF-like 2                   | 0               | 5               | 0                | -1.68324            |
| 1180 | 76123   | Gpsm2         | G-protein signalling modulator 2 (AGS3-like, C. elegans)                | 0               | 3               | 2                | -1.68251            |

Candidates for positive regulators of normal growth (Fisher's)

| Rank | entrez# | Gene Symbol   | Gene name                                                                 | enriched shRNAs | depleted shRNAs | no change shRNAs | average Fold Change |
|------|---------|---------------|---------------------------------------------------------------------------|-----------------|-----------------|------------------|---------------------|
| 1181 | 68323   | Nudt22        | nudix (nucleoside diphosphate linked moiety X)-type motif 22              | 0               | 3               | 1                | -1.68249            |
| 1182 | 16491   | Kcna3         | potassium voltage-gated channel, shaker-related subfamily, member 3       | 0               | 4               | 1                | -1.6823             |
| 1183 | 55932   | Gbp4          | guanylate binding protein 3                                               | 0               | 3               | 2                | -1.68212            |
| 1184 | 58180   | Hic2          | hypermethylated in cancer 2                                               | 0               | 4               | 1                | -1.68155            |
| 1185 | 12227   | Btg2          | B cell translocation gene 2, anti-proliferative                           | 0               | 4               | 1                | -1.68106            |
| 1186 | 80281   | Cttnbp2nl     | CTTNBP2 N-terminal like                                                   | 0               | 3               | 1                | -1.68087            |
| 1187 | 330941  | AI593442      | expressed sequence AI593442                                               | 0               | 4               | 0                | -1.68056            |
| 1188 | 21371   | Tbca          | tubulin cofactor A                                                        | 0               | 3               | 2                | -1.68054            |
| 1189 | 13589   | Mapre1        | microtubule-associated protein, RP/EB family, member 1                    | 0               | 3               | 2                | -1.68047            |
| 1190 | 16467   | Atcay         | ataxia, cerebellar, Cayman type homolog (human)                           | 0               | 3               | 1                | -1.68041            |
| 1191 | 14199   | Fhl1          | four and a half LIM domains 1                                             | 0               | 5               | 0                | -1.68032            |
| 1192 | 21877   | Tk1           | thymidine kinase 1                                                        | 0               | 4               | 1                | -1.68014            |
| 1193 | 225631  | Onecut2       | one cut domain, family member 2                                           | 0               | 3               | 2                | -1.68009            |
| 1194 | 269695  | Tmem118       | ring finger protein, transmembrane 2                                      | 0               | 4               | 1                | -1.68009            |
| 1195 | 75258   | 4930563M21Rik | RIKEN cDNA 4930563M21 gene                                                | 0               | 3               | 2                | -1.6798             |
| 1196 | 268420  | Alkbh5        | alkB, alkylation repair homolog 5 (E. coli)                               | 0               | 3               | 2                | -1.67976            |
| 1197 | 59026   | Huwe1         | HECT, UBA and WWE domain containing 1                                     | 0               | 3               | 2                | -1.67976            |
| 1198 | 20747   | Spop          | speckle-type POZ protein                                                  | 0               | 3               | 2                | -1.6797             |
| 1199 | 241175  | C230078M14Rik | contactin associated protein-like 5B                                      | 0               | 4               | 1                | -1.67917            |
| 1200 | 16617   | Klk1b24       | kallikrein 1-related peptidase b24                                        | 0               | 3               | 2                | -1.67916            |
| 1201 | 20666   | Sox11         | SRY-box containing gene 11                                                | 0               | 3               | 2                | -1.67914            |
| 1202 | 20658   | Son           | Son DNA binding protein                                                   | 0               | 4               | 1                | -1.67895            |
| 1203 | 22115   | Tssk2         | testis-specific serine kinase 2                                           | 0               | 3               | 2                | -1.67892            |
| 1204 | 14765   | Gpr50         | G-protein-coupled receptor 50                                             | 0               | 3               | 2                | -1.67884            |
| 1205 | 113863  | V1rc6         | vomer nasal 1 receptor 15                                                 | 0               | 3               | 2                | -1.67843            |
| 1206 | 67932   | 1700129C05Rik | RIKEN cDNA 1700129C05 gene                                                | 0               | 3               | 2                | -1.6782             |
| 1207 | 18569   | Pdcd4         | programmed cell death 4                                                   | 0               | 3               | 2                | -1.67803            |
| 1208 | 16909   | Lmo2          | LIM domain only 2                                                         | 0               | 3               | 2                | -1.67727            |
| 1209 | 232975  | Atp1a3        | ATPase, Na <sup>+</sup> /K <sup>+</sup> transporting, alpha 3 polypeptide | 0               | 3               | 2                | -1.67701            |
| 1210 | 93840   | Ltap          | vang-like 2 (van gogh, Drosophila)                                        | 0               | 3               | 2                | -1.67659            |
| 1211 | 12575   | Cdkn1a        | cyclin-dependent kinase inhibitor 1A (P21)                                | 0               | 5               | 5                | -1.67632            |
| 1212 | 218100  | Zfp322a       | zinc finger protein 322A                                                  | 0               | 4               | 1                | -1.67601            |
| 1213 | 69454   | Clic3         | chloride intracellular channel 3                                          | 0               | 4               | 1                | -1.67576            |
| 1214 | 219105  | 9830124H08Rik | zinc finger, MYM-type 5                                                   | 0               | 3               | 2                | -1.67576            |
| 1215 | 69009   | Thap7         | THAP domain containing 7                                                  | 0               | 4               | 0                | -1.67542            |
| 1216 | 17279   | Melk          | maternal embryonic leucine zipper kinase                                  | 0               | 3               | 2                | -1.67499            |
| 1217 | 319642  | Rab9b         | RAB9B, member RAS oncogene family                                         | 0               | 3               | 2                | -1.67482            |

Candidates for positive regulators of normal growth (Fisher's)

| Rank | entrez# | Gene Symbol   | Gene name                                                           | enriched shRNAs | depleted shRNAs | no change shRNAs | average Fold Change |
|------|---------|---------------|---------------------------------------------------------------------|-----------------|-----------------|------------------|---------------------|
| 1218 | 619298  | G930045G22Rik | RIKEN cDNA G930045G22 gene                                          | 0               | 3               | 2                | -1.67467            |
| 1219 | 19185   | Psmc4         | proteasome (prosome, macropain) 26S subunit, non-ATPase, 4          | 0               | 4               | 1                | -1.67457            |
| 1220 | 333715  | H2-M10.2      | histocompatibility 2, M region locus 10.2                           | 0               | 4               | 1                | -1.67446            |
| 1221 | 332713  | BC051628      | cDNA sequence BC051628                                              | 0               | 4               | 1                | -1.67438            |
| 1222 | 57330   | Perq1         | GRB10 interacting GYF protein 1                                     | 0               | 4               | 0                | -1.67436            |
| 1223 | 76964   | 2610028H24Rik | RIKEN cDNA 2610028H24 gene                                          | 0               | 3               | 2                | -1.67399            |
| 1224 | 30800   | Mmp20         | matrix metalloproteinase 20 (enamelysin)                            | 0               | 3               | 2                | -1.67393            |
| 1225 | 18573   | Pde1a         | phosphodiesterase 1A, calmodulin-dependent                          | 0               | 3               | 2                | -1.67386            |
| 1226 | 231293  | C130090K23Rik | cell wall biogenesis 43 C-terminal homolog ( <i>S. cerevisiae</i> ) | 0               | 4               | 1                | -1.67367            |
| 1227 | 11477   | Acvr1         | activin A receptor, type 1                                          | 0               | 3               | 2                | -1.67361            |
| 1228 | 271424  | Ihpk3         | inositol hexaphosphate kinase 3                                     | 0               | 3               | 2                | -1.67345            |
| 1229 | 22217   | Usp12         | ubiquitin specific peptidase 12                                     | 0               | 3               | 2                | -1.67331            |
| 1230 | 66314   | Tpd52l2       | tumor protein D52-like 2                                            | 0               | 3               | 2                | -1.67287            |
| 1231 | 75512   | Gpx6          | glutathione peroxidase 6                                            | 0               | 4               | 1                | -1.67268            |
| 1232 | 11549   | Adra1a        | adrenergic receptor, alpha 1a                                       | 0               | 3               | 1                | -1.6726             |
| 1233 | 15247   | Hiat1         | hippocampus abundant gene transcript 1                              | 0               | 3               | 2                | -1.67251            |
| 1234 | 11936   | Fxyd2         | FXD domain-containing ion transport regulator 2                     | 0               | 3               | 2                | -1.67189            |
| 1235 | 67141   | Fbxo5         | F-box protein 5                                                     | 0               | 3               | 2                | -1.67153            |
| 1236 | 435723  | UNK           | NA                                                                  | 0               | 3               | 2                | -1.67145            |
| 1237 | 68981   | Snrpa1        | small nuclear ribonucleoprotein polypeptide A'                      | 0               | 3               | 2                | -1.67141            |
| 1238 | 17187   | Max           | Max protein                                                         | 0               | 4               | 1                | -1.67047            |
| 1239 | 22286   | Utf1          | undifferentiated embryonic cell transcription factor 1              | 0               | 3               | 2                | -1.66995            |
| 1240 | 70986   | 4931422A03Rik | RIKEN cDNA 4931422A03 gene                                          | 0               | 3               | 1                | -1.66884            |
| 1241 | 19210   | Ptdss1        | phosphatidylserine synthase 1                                       | 0               | 3               | 2                | -1.66853            |
| 1242 | 269513  | E130310K16Rik | Na <sup>+</sup> /K <sup>+</sup> transporting ATPase interacting 3   | 0               | 4               | 1                | -1.66822            |
| 1243 | 73747   | 1110034G24Rik | RIKEN cDNA 1110034G24 gene                                          | 0               | 3               | 2                | -1.66799            |
| 1244 | 259011  | Olf389        | olfactory receptor 389                                              | 0               | 4               | 1                | -1.66797            |
| 1245 | 433470  | AA467197      | expressed sequence AA467197                                         | 0               | 3               | 2                | -1.66795            |
| 1246 | 246049  | Slc36a2       | solute carrier family 36 (proton/amino acid symporter), member 2    | 0               | 4               | 1                | -1.66747            |
| 1247 | 110829  | Lims1         | LIM and senescent cell antigen-like domains 1                       | 0               | 3               | 2                | -1.66721            |
| 1248 | 18655   | Pgk1          | phosphoglycerate kinase 1                                           | 0               | 3               | 7                | -1.66706            |
| 1249 | 107522  | Ece2          | endothelin converting enzyme 2                                      | 0               | 3               | 2                | -1.6668             |
| 1250 | 18550   | Furin         | furin (paired basic amino acid cleaving enzyme)                     | 0               | 4               | 1                | -1.66674            |
| 1251 | 20787   | Sreb1         | sterol regulatory element binding transcription factor 1            | 0               | 3               | 2                | -1.66668            |
| 1252 | 433861  | UNK           | NA                                                                  | 0               | 3               | 2                | -1.66503            |
| 1253 | 14415   | Gad1          | glutamic acid decarboxylase 1                                       | 0               | 3               | 2                | -1.66493            |
| 1254 | 74318   | Hod           | HOP homeobox                                                        | 0               | 3               | 2                | -1.66418            |

Candidates for positive regulators of normal growth (Fisher's)

| Rank | entrez# | Gene Symbol   | Gene name                                                 | enriched shRNAs | depleted shRNAs | no change shRNAs | average Fold Change |
|------|---------|---------------|-----------------------------------------------------------|-----------------|-----------------|------------------|---------------------|
| 1255 | 432929  | LOC432929     | NA                                                        | 0               | 3               | 6                | -1.66416            |
| 1256 | 239833  | Lmln          | leishmanolysin-like (metallopeptidase M8 family)          | 0               | 4               | 1                | -1.66409            |
| 1257 | 16997   | Ltbp2         | latent transforming growth factor beta binding protein 2  | 0               | 3               | 2                | -1.66392            |
| 1258 | 116847  | Prelp         | proline arginine-rich end leucine-rich repeat             | 0               | 3               | 2                | -1.66331            |
| 1259 | 18567   | Pdcd2         | programmed cell death 2                                   | 0               | 4               | 1                | -1.6633             |
| 1260 | 71960   | Myh14         | myosin, heavy polypeptide 14                              | 0               | 3               | 2                | -1.66325            |
| 1261 | 246703  | Apoa1bp       | apolipoprotein A-I binding protein                        | 0               | 3               | 1                | -1.66295            |
| 1262 | 68458   | Ppp1r14a      | protein phosphatase 1, regulatory (inhibitor) subunit 14A | 0               | 4               | 1                | -1.66292            |
| 1263 | 227290  | Aamp          | angio-associated migratory protein                        | 0               | 4               | 1                | -1.66283            |
| 1264 | 59069   | Tpm3          | tropomyosin 3, gamma                                      | 0               | 3               | 2                | -1.66222            |
| 1265 | 56546   | Sec1          | secretory blood group 1                                   | 0               | 3               | 2                | -1.66219            |
| 1266 | 29859   | Sult4a1       | sulfotransferase family 4A, member 1                      | 0               | 3               | 2                | -1.66216            |
| 1267 | 14149   | Fdxr          | ferredoxin reductase                                      | 0               | 4               | 1                | -1.66208            |
| 1268 | 93673   | Cml2          | camello-like 2                                            | 0               | 3               | 2                | -1.66189            |
| 1269 | 29806   | Limd1         | LIM domains containing 1                                  | 0               | 3               | 2                | -1.66135            |
| 1270 | 75221   | Dpp3          | dipeptidylpeptidase 3                                     | 0               | 3               | 2                | -1.66123            |
| 1271 | 209512  | Taar2         | trace amine-associated receptor 2                         | 0               | 3               | 2                | -1.66123            |
| 1272 | 11799   | Birc5         | baculoviral IAP repeat-containing 5                       | 0               | 3               | 2                | -1.66105            |
| 1273 | 58522   | Trim54        | tripartite motif-containing 54                            | 0               | 4               | 1                | -1.66105            |
| 1274 | 73690   | Glipr1        | GLI pathogenesis-related 1 (glioma)                       | 0               | 4               | 1                | -1.66037            |
| 1275 | 192654  | Lypla3        | phospholipase A2, group XV                                | 0               | 3               | 2                | -1.66037            |
| 1276 | 223690  | C730048E16Rik | ankyrin repeat domain 54                                  | 0               | 3               | 2                | -1.66032            |
| 1277 | 319508  | Syt15         | synaptotagmin XV                                          | 0               | 4               | 1                | -1.66019            |
| 1278 | 386392  | LOC386392     | NA                                                        | 0               | 3               | 2                | -1.66019            |
| 1279 | 70843   | 4733401L19Rik | keratin 28                                                | 0               | 3               | 2                | -1.65879            |
| 1280 | 20319   | Sfrp2         | secreted frizzled-related protein 2                       | 0               | 4               | 1                | -1.65832            |
| 1281 | 14626   | Gk2           | glycerol kinase 2                                         | 0               | 5               | 0                | -1.65777            |
| 1282 | 71832   | Csl           | citrate synthase like                                     | 0               | 3               | 2                | -1.65771            |
| 1283 | 77733   | Rnf170        | ring finger protein 170                                   | 0               | 3               | 2                | -1.65765            |
| 1284 | 240186  | Zfp438        | zinc finger protein 438                                   | 0               | 3               | 2                | -1.65749            |
| 1285 | 16852   | Lgals1        | lectin, galactose binding, soluble 1                      | 0               | 3               | 2                | -1.6574             |
| 1286 | 56196   | Ttrap         | tyrosyl-DNA phosphodiesterase 2                           | 0               | 3               | 1                | -1.65714            |
| 1287 | 54123   | Irf7          | interferon regulatory factor 7                            | 0               | 3               | 2                | -1.65703            |
| 1288 | 19942   | Rpl27         | ribosomal protein L27                                     | 0               | 4               | 1                | -1.65678            |
| 1289 | 67171   | Tmem77        | DNA-damage regulated autophagy modulator 2                | 0               | 3               | 1                | -1.65598            |
| 1290 | 210172  | Zfp526        | zinc finger protein 526                                   | 0               | 4               | 1                | -1.65596            |
| 1291 | 214895  | Lman2l        | lectin, mannose-binding 2-like                            | 0               | 4               | 1                | -1.65555            |

## Candidates for positive regulators of normal growth (Fisher's)

| Rank | entrez# | Gene Symbol   | Gene name                                                                                      | enriched shRNAs | depleted shRNAs | no change shRNAs | average Fold Change |
|------|---------|---------------|------------------------------------------------------------------------------------------------|-----------------|-----------------|------------------|---------------------|
| 1292 | 72472   | Slc16a10      | solute carrier family 16 (monocarboxylic acid transporters), member 10                         | 0               | 4               | 1                | -1.65539            |
| 1293 | 15551   | Htr1b         | 5-hydroxytryptamine (serotonin) receptor 1B                                                    | 0               | 3               | 2                | -1.65481            |
| 1294 | 258378  | OlfR593       | olfactory receptor 593                                                                         | 0               | 3               | 1                | -1.65329            |
| 1295 | 245537  | Nlgn3         | neuroligin 3                                                                                   | 0               | 4               | 1                | -1.65324            |
| 1296 | 19246   | Ptpn1         | protein tyrosine phosphatase, non-receptor type 1                                              | 0               | 3               | 2                | -1.65312            |
| 1297 | 12482   | Ms4a1         | membrane-spanning 4-domains, subfamily A, member 1                                             | 0               | 5               | 0                | -1.65252            |
| 1298 | 216749  | Nmur2         | neuromedin U receptor 2                                                                        | 0               | 3               | 2                | -1.6519             |
| 1299 | 18979   | Pon1          | paraoxonase 1                                                                                  | 0               | 3               | 2                | -1.65159            |
| 1300 | 21907   | Nr2e1         | nuclear receptor subfamily 2, group E, member 1                                                | 0               | 3               | 2                | -1.65151            |
| 1301 | 14709   | Gng8          | guanine nucleotide binding protein (G protein), gamma 8                                        | 0               | 3               | 2                | -1.65129            |
| 1302 | 17064   | Cd93          | CD93 antigen                                                                                   | 0               | 3               | 2                | -1.65085            |
| 1303 | 385052  | UNK           | NA                                                                                             | 0               | 4               | 1                | -1.64914            |
| 1304 | 16841   | Lect2         | leukocyte cell-derived chemotaxin 2                                                            | 0               | 4               | 1                | -1.64904            |
| 1305 | 16660   | Krt1-1        | keratin 31                                                                                     | 0               | 3               | 2                | -1.64874            |
| 1306 | 14343   | Fut1          | fucosyltransferase 1                                                                           | 0               | 4               | 1                | -1.64846            |
| 1307 | 64144   | Mllt1         | myeloid/lymphoid or mixed-lineage leukemia (trithorax homolog, Drosophila); translocated to, 1 | 0               | 3               | 2                | -1.64831            |
| 1308 | 243369  | Sspo          | SCO-spondin                                                                                    | 0               | 3               | 2                | -1.6477             |
| 1309 | 52857   | Gramd1a       | GRAM domain containing 1A                                                                      | 0               | 3               | 2                | -1.64767            |
| 1310 | 68550   | 1110002N22Rik | RIKEN cDNA 1110002N22 gene                                                                     | 0               | 3               | 2                | -1.64736            |
| 1311 | 11651   | Akt1          | thymoma viral proto-oncogene 1                                                                 | 0               | 6               | 4                | -1.64683            |
| 1312 | 394252  | Serpinb3d     | serine (or cysteine) peptidase inhibitor, clade B (ovalbumin), member 3D                       | 0               | 3               | 2                | -1.64638            |
| 1313 | 270135  | BC038156      | NA                                                                                             | 0               | 3               | 1                | -1.64551            |
| 1314 | 13864   | Nr2f6         | nuclear receptor subfamily 2, group F, member 6                                                | 0               | 4               | 1                | -1.64462            |
| 1315 | 70227   | 3000002G13Rik | zinc finger protein 619                                                                        | 0               | 3               | 2                | -1.64381            |
| 1316 | 217214  | Nags          | N-acetylglutamate synthase                                                                     | 0               | 4               | 1                | -1.64379            |
| 1317 | 16434   | Itpa          | inosine triphosphatase (nucleoside triphosphate pyrophosphatase)                               | 0               | 3               | 2                | -1.64377            |
| 1318 | 80985   | Trim44        | tripartite motif-containing 44                                                                 | 0               | 3               | 2                | -1.64375            |
| 1319 | 280121  | LOC280121     | ribosomal protein, large, P1, pseudogene 1                                                     | 0               | 3               | 2                | -1.64349            |
| 1320 | 18845   | Plxna2        | plexin A2                                                                                      | 0               | 4               | 1                | -1.64293            |
| 1321 | 20616   | Snap91        | synaptosomal-associated protein 91                                                             | 0               | 4               | 1                | -1.64259            |
| 1322 | 433670  | UNK           | NA                                                                                             | 0               | 3               | 2                | -1.64206            |
| 1323 | 68221   | 1700049M11Rik | WAP four-disulfide core domain 15A                                                             | 0               | 4               | 1                | -1.64093            |
| 1324 | 69551   | 2310022B05Rik | RIKEN cDNA 2310022B05 gene                                                                     | 0               | 3               | 2                | -1.64088            |
| 1325 | 14747   | Cmk1r1        | chemokine-like receptor 1                                                                      | 0               | 3               | 2                | -1.64076            |
| 1326 | 69957   | Cdc16         | CDC16 cell division cycle 16 homolog (S. cerevisiae)                                           | 0               | 3               | 2                | -1.64068            |
| 1327 | 22174   | Tyro3         | TYRO3 protein tyrosine kinase 3                                                                | 0               | 4               | 1                | -1.6406             |
| 1328 | 57440   | Ehd3          | EH-domain containing 3                                                                         | 0               | 3               | 2                | -1.64056            |

Candidates for positive regulators of normal growth (Fisher's)

| Rank | entrez# | Gene Symbol   | Gene name                                                         | enriched shRNAs | depleted shRNAs | no change shRNAs | average Fold Change |
|------|---------|---------------|-------------------------------------------------------------------|-----------------|-----------------|------------------|---------------------|
| 1329 | 15937   | Ier3          | immediate early response 3                                        | 0               | 3               | 1                | -1.64046            |
| 1330 | 269344  | Ell3          | elongation factor RNA polymerase II-like 3                        | 0               | 4               | 1                | -1.64043            |
| 1331 | 19272   | Ptprk         | protein tyrosine phosphatase, receptor type, K                    | 0               | 3               | 2                | -1.63995            |
| 1332 | 12226   | Btg1          | B cell translocation gene 1, anti-proliferative                   | 0               | 3               | 2                | -1.63974            |
| 1333 | 15126   | Hba-x         | hemoglobin X, alpha-like embryonic chain in Hba complex           | 0               | 3               | 2                | -1.63957            |
| 1334 | 107477  | Guca1b        | guanylate cyclase activator 1B                                    | 0               | 4               | 1                | -1.63927            |
| 1335 | 22260   | Nr1h2         | nuclear receptor subfamily 1, group H, member 2                   | 0               | 3               | 2                | -1.63791            |
| 1336 | 58245   | Gpr180        | G protein-coupled receptor 180                                    | 0               | 3               | 2                | -1.63785            |
| 1337 | 268739  | E130112L23Rik | Rho guanine nucleotide exchange factor (GEF) 40                   | 0               | 3               | 2                | -1.63769            |
| 1338 | 50784   | Ppap2c        | phosphatidic acid phosphatase type 2C                             | 0               | 4               | 1                | -1.63754            |
| 1339 | 69367   | Glrx2         | glutaredoxin 2 (thioltransferase)                                 | 0               | 4               | 1                | -1.63754            |
| 1340 | 102693  | Phldb1        | pleckstrin homology-like domain, family B, member 1               | 0               | 3               | 2                | -1.63678            |
| 1341 | 52040   | Ppp1r10       | protein phosphatase 1, regulatory subunit 10                      | 0               | 3               | 2                | -1.63663            |
| 1342 | 20861   | Stfa1         | stefin A1                                                         | 0               | 3               | 2                | -1.63629            |
| 1343 | 15424   | Hoxc5         | homeobox C5                                                       | 0               | 3               | 2                | -1.636              |
| 1344 | 140858  | Wdr5          | WD repeat domain 5                                                | 0               | 3               | 2                | -1.63543            |
| 1345 | 71990   | Ddx54         | DEAD (Asp-Glu-Ala-Asp) box polypeptide 54                         | 0               | 3               | 2                | -1.63522            |
| 1346 | 227613  | Tubb2c        | tubulin, beta 4B class IVB                                        | 0               | 3               | 2                | -1.63516            |
| 1347 | 67881   | 1810034K20Rik | magnesium-dependent phosphatase 1                                 | 0               | 5               | 0                | -1.63511            |
| 1348 | 14533   | Bloc1s1       | biogenesis of lysosome-related organelles complex-1, subunit 1    | 0               | 3               | 2                | -1.63476            |
| 1349 | 52187   | Rragd         | Ras-related GTP binding D                                         | 0               | 4               | 1                | -1.63451            |
| 1350 | 12234   | Btrc          | beta-transducin repeat containing protein                         | 0               | 5               | 0                | -1.63446            |
| 1351 | 210801  | Unc5d         | unc-5 homolog D (C. elegans)                                      | 0               | 3               | 2                | -1.63443            |
| 1352 | 14788   | Gpr162        | G protein-coupled receptor 162                                    | 0               | 3               | 2                | -1.63442            |
| 1353 | 216343  | Tph2          | tryptophan hydroxylase 2                                          | 0               | 3               | 2                | -1.63432            |
| 1354 | 22264   | Prap1         | proline-rich acidic protein 1                                     | 0               | 3               | 2                | -1.63373            |
| 1355 | 66053   | Ppil2         | peptidylprolyl isomerase (cyclophilin)-like 2                     | 0               | 3               | 2                | -1.63331            |
| 1356 | 333088  | Crim2         | kielin/chordin-like protein                                       | 0               | 3               | 2                | -1.63285            |
| 1357 | 28199   | Wdr23         | DDB1 and CUL4 associated factor 11                                | 0               | 3               | 1                | -1.63275            |
| 1358 | 11431   | Acp1          | acid phosphatase 1, soluble                                       | 0               | 3               | 1                | -1.63244            |
| 1359 | 54394   | Crif3         | cytokine receptor-like factor 3                                   | 0               | 4               | 1                | -1.63243            |
| 1360 | 50883   | Chek2         | checkpoint kinase 2                                               | 0               | 3               | 2                | -1.63234            |
| 1361 | 67755   | Ddx47         | DEAD (Asp-Glu-Ala-Asp) box polypeptide 47                         | 0               | 3               | 2                | -1.63201            |
| 1362 | 67217   | 2810055F11Rik | RIKEN cDNA 2810055F11 gene                                        | 0               | 3               | 2                | -1.6317             |
| 1363 | 24110   | Usp18         | ubiquitin specific peptidase 18                                   | 0               | 4               | 1                | -1.63161            |
| 1364 | 14181   | Fgfbp1        | fibroblast growth factor binding protein 1                        | 0               | 3               | 2                | -1.63143            |
| 1365 | 17904   | Myl6          | myosin, light polypeptide 6, alkali, smooth muscle and non-muscle | 0               | 4               | 1                | -1.63136            |



Candidates for positive regulators of normal growth (Fisher's)

| Rank | entrez# | Gene Symbol   | Gene name                                                                                             | enriched shRNAs | depleted shRNAs | no change shRNAs | average Fold Change |
|------|---------|---------------|-------------------------------------------------------------------------------------------------------|-----------------|-----------------|------------------|---------------------|
| 1366 | 116903  | Calcb         | calcitonin-related polypeptide, beta                                                                  | 0               | 3               | 2                | -1.63094            |
| 1367 | 433839  | LOC433839     | NA                                                                                                    | 0               | 4               | 1                | -1.63022            |
| 1368 | 29810   | Bag3          | BCL2-associated athanogene 3                                                                          | 0               | 3               | 2                | -1.62979            |
| 1369 | 16476   | Jun           | Jun oncogene                                                                                          | 0               | 4               | 6                | -1.62964            |
| 1370 | 228228  | Olf1102       | olfactory receptor 1102                                                                               | 0               | 3               | 2                | -1.62926            |
| 1371 | 24082   | Gtlf3a        | predicted gene, Gm16516                                                                               | 0               | 3               | 1                | -1.62918            |
| 1372 | 320858  | D930040M24Rik | l(3)mbt-like 4 (Drosophila)                                                                           | 0               | 4               | 1                | -1.62916            |
| 1373 | 17168   | Mare          | nitrogen permease regulator-like 3 ( <i>S. cerevisiae</i> )                                           | 0               | 3               | 2                | -1.62907            |
| 1374 | 230979  | Tnfrsf14      | tumor necrosis factor receptor superfamily, member 14 (herpesvirus entry mediator)                    | 0               | 3               | 2                | -1.62892            |
| 1375 | 66653   | Brf2          | BRF2, subunit of RNA polymerase III transcription initiation factor, BRF1-like                        | 0               | 3               | 2                | -1.62865            |
| 1376 | 14166   | Fgf11         | fibroblast growth factor 11                                                                           | 0               | 4               | 1                | -1.6286             |
| 1377 | 13180   | Pcbd1         | pterin 4 alpha carbinolamine dehydratase/dimerization cofactor of hepatocyte nuclear factor 1 alpha ( | 0               | 4               | 1                | -1.62833            |
| 1378 | 333473  | Zfp36l3       | zinc finger protein 36, C3H type-like 3                                                               | 0               | 3               | 1                | -1.6283             |
| 1379 | 18035   | Nfkbia        | nuclear factor of kappa light polypeptide gene enhancer in B cells inhibitor, alpha                   | 0               | 4               | 1                | -1.62824            |
| 1380 | 14228   | Fkbp4         | FK506 binding protein 4                                                                               | 0               | 3               | 2                | -1.62802            |
| 1381 | 66264   | Ccdc28b       | coiled coil domain containing 28B                                                                     | 0               | 4               | 1                | -1.6279             |
| 1382 | 67642   | 4930515G01Rik | RIKEN cDNA 4930515G01 gene                                                                            | 0               | 3               | 2                | -1.62771            |
| 1383 | 19356   | Rad17         | RAD17 homolog ( <i>S. pombe</i> )                                                                     | 0               | 4               | 1                | -1.62741            |
| 1384 | 56421   | Pfkp          | phosphofructokinase, platelet                                                                         | 0               | 3               | 2                | -1.62735            |
| 1385 | 338375  | Atp6v1g3      | ATPase, H+ transporting, lysosomal V1 subunit G3                                                      | 0               | 4               | 1                | -1.6265             |
| 1386 | 107747  | Aldh1l1       | aldehyde dehydrogenase 1 family, member L1                                                            | 0               | 3               | 2                | -1.62576            |
| 1387 | 12269   | C4bp          | complement component 4 binding protein                                                                | 0               | 3               | 2                | -1.62542            |
| 1388 | 22423   | Wnt8b         | wingless related MMTV integration site 8b                                                             | 0               | 5               | 0                | -1.62537            |
| 1389 | 70069   | H1fnt         | H1 histone family, member N, testis-specific                                                          | 0               | 4               | 1                | -1.62447            |
| 1390 | 223864  | Rapgef3       | Rap guanine nucleotide exchange factor (GEF) 3                                                        | 0               | 3               | 2                | -1.6239             |
| 1391 | 70980   | 4931431F19Rik | RIKEN cDNA 4931431F19 gene                                                                            | 0               | 4               | 1                | -1.62383            |
| 1392 | 12561   | Cdh4          | cadherin 4                                                                                            | 0               | 4               | 1                | -1.62376            |
| 1393 | 399549  | H2-M10.6      | histocompatibility 2, M region locus 10.6                                                             | 0               | 3               | 2                | -1.6233             |
| 1394 | 22297   | V1ra2         | vomer nasal 1 receptor 45                                                                             | 0               | 3               | 2                | -1.62245            |
| 1395 | 16416   | Itgb3         | integrin beta 3                                                                                       | 0               | 3               | 2                | -1.62226            |
| 1396 | 12966   | Crygc         | crystallin, gamma C                                                                                   | 0               | 4               | 1                | -1.62168            |
| 1397 | 16157   | Il11ra1       | interleukin 11 receptor, alpha chain 1                                                                | 0               | 3               | 2                | -1.62127            |
| 1398 | 12741   | Cldn5         | claudin 5                                                                                             | 0               | 4               | 1                | -1.62118            |
| 1399 | 215332  | Slc36a3       | solute carrier family 36 (proton/amino acid symporter), member 3                                      | 0               | 3               | 2                | -1.62009            |
| 1400 | 110074  | Dut           | deoxyuridine triphosphatase                                                                           | 0               | 4               | 1                | -1.62008            |
| 1401 | 258730  | Olf483        | olfactory receptor 483                                                                                | 0               | 3               | 1                | -1.6198             |
| 1402 | 19951   | Rpl32         | ribosomal protein L32                                                                                 | 0               | 5               | 0                | -1.61974            |

## Candidates for positive regulators of normal growth (Fisher's)

| Rank | entrez# | Gene Symbol   | Gene name                                                                              | enriched shRNAs | depleted shRNAs | no change shRNAs | average Fold Change |
|------|---------|---------------|----------------------------------------------------------------------------------------|-----------------|-----------------|------------------|---------------------|
| 1403 | 69955   | Fars2         | phenylalanine-tRNA synthetase 2 (mitochondrial)                                        | 0               | 3               | 2                | -1.61966            |
| 1404 | 217837  | Itpk1         | inositol 1,3,4-triphosphate 5/6 kinase                                                 | 0               | 3               | 2                | -1.61933            |
| 1405 | 18003   | Nedd9         | neural precursor cell expressed, developmentally down-regulated gene 9                 | 0               | 3               | 2                | -1.61895            |
| 1406 | 378430  | Nanos2        | nanos homolog 2 (Drosophila)                                                           | 0               | 3               | 2                | -1.61891            |
| 1407 | 70419   | 2810408A11Rik | RIKEN cDNA 2810408A11 gene                                                             | 0               | 3               | 2                | -1.61887            |
| 1408 | 14693   | Gnb2          | guanine nucleotide binding protein (G protein), beta 2                                 | 0               | 4               | 1                | -1.61871            |
| 1409 | 19727   | Rfxank        | regulatory factor X-associated ankyrin-containing protein                              | 0               | 4               | 1                | -1.61828            |
| 1410 | 20660   | Sor1          | sortilin-related receptor, LDLR class A repeats-containing                             | 0               | 3               | 1                | -1.61799            |
| 1411 | 259095  | Olfir568      | olfactory receptor 568                                                                 | 0               | 4               | 0                | -1.61799            |
| 1412 | 258898  | Olfir1203     | olfactory receptor 1205                                                                | 0               | 3               | 2                | -1.61795            |
| 1413 | 69312   | 4930418G15Rik | protein phosphatase 1, regulatory subunit 42                                           | 0               | 4               | 1                | -1.61739            |
| 1414 | 18037   | Nfkbie        | nuclear factor of kappa light polypeptide gene enhancer in B cells inhibitor, epsilon  | 0               | 3               | 2                | -1.61706            |
| 1415 | 66467   | Gtf2h5        | general transcription factor IIH, polypeptide 5                                        | 0               | 4               | 1                | -1.61686            |
| 1416 | 434071  | UNK           | NA                                                                                     | 0               | 3               | 2                | -1.6168             |
| 1417 | 12053   | Bcl6          | B cell leukemia/lymphoma 6                                                             | 0               | 3               | 2                | -1.6165             |
| 1418 | 17420   | Mnat1         | menage a trois 1                                                                       | 0               | 4               | 1                | -1.61628            |
| 1419 | 18369   | Olfir68       | olfactory receptor 68                                                                  | 0               | 3               | 2                | -1.61582            |
| 1420 | 27276   | Plekhhb1      | pleckstrin homology domain containing, family B (evectins) member 1                    | 0               | 3               | 2                | -1.61579            |
| 1421 | 20364   | Sepw1         | selenoprotein W, muscle 1                                                              | 0               | 3               | 1                | -1.6154             |
| 1422 | 57430   | Sult3a1       | sulfotransferase family 3A, member 1                                                   | 0               | 3               | 2                | -1.61535            |
| 1423 | 108078  | Olr1          | oxidized low density lipoprotein (lectin-like) receptor 1                              | 0               | 3               | 2                | -1.61513            |
| 1424 | 14961   | H2-Ab1        | histocompatibility 2, class II antigen A, beta 1                                       | 0               | 4               | 6                | -1.61496            |
| 1425 | 11656   | Alas2         | aminolevulinic acid synthase 2, erythroid                                              | 0               | 3               | 2                | -1.61452            |
| 1426 | 232664  | 4921511K06Rik | coiled-coil domain containing 136                                                      | 0               | 3               | 2                | -1.61426            |
| 1427 | 79263   | Trim39        | tripartite motif-containing 39                                                         | 0               | 3               | 2                | -1.61362            |
| 1428 | 194360  | LOC194360     | trypsinogen pseudogene                                                                 | 0               | 7               | 3                | -1.61359            |
| 1429 | 66401   | Nudt2         | nudix (nucleoside diphosphate linked moiety X)-type motif 2                            | 0               | 3               | 2                | -1.61302            |
| 1430 | 27426   | Nagpa         | N-acetylglucosamine-1-phosphodiester alpha-N-acetylglucosaminidase                     | 0               | 3               | 2                | -1.61281            |
| 1431 | 66834   | Them2         | acyl-CoA thioesterase 13                                                               | 0               | 3               | 1                | -1.6128             |
| 1432 | 70432   | Rufy2         | RUN and FYVE domain-containing 2                                                       | 0               | 3               | 2                | -1.61199            |
| 1433 | 227696  | Phyhd1        | phytanoyl-CoA dioxygenase domain containing 1                                          | 0               | 4               | 4                | -1.61186            |
| 1434 | 228880  | Prkcbp1       | zinc finger, MYND-type containing 8                                                    | 0               | 3               | 2                | -1.61182            |
| 1435 | 12969   | Crygf         | crystallin, gamma F                                                                    | 0               | 4               | 1                | -1.61179            |
| 1436 | 66656   | Eef1d         | eukaryotic translation elongation factor 1 delta (guanine nucleotide exchange protein) | 0               | 4               | 1                | -1.61164            |
| 1437 | 236537  | Zfp352        | zinc finger protein 352                                                                | 0               | 3               | 2                | -1.61127            |
| 1438 | 11854   | Rhod          | ras homolog gene family, member D                                                      | 0               | 3               | 2                | -1.61067            |
| 1439 | 52033   | Pbk           | PDZ binding kinase                                                                     | 0               | 4               | 1                | -1.60985            |

Candidates for positive regulators of normal growth (Fisher's)

| Rank | entrez# | Gene Symbol   | Gene name                                                           | enriched shRNAs | depleted shRNAs | no change shRNAs | average Fold Change |
|------|---------|---------------|---------------------------------------------------------------------|-----------------|-----------------|------------------|---------------------|
| 1440 | 78428   | Wibg          | within bgcn homolog (Drosophila)                                    | 0               | 3               | 1                | -1.60983            |
| 1441 | 17259   | Mef2b         | myocyte enhancer factor 2B                                          | 0               | 3               | 2                | -1.60981            |
| 1442 | 380714  | Rph3al        | rabphilin 3A-like (without C2 domains)                              | 0               | 3               | 2                | -1.60932            |
| 1443 | 17701   | Msx1          | homeobox, msh-like 1                                                | 0               | 3               | 2                | -1.60867            |
| 1444 | 212114  | 8030451K01Rik | NHL repeat containing 3                                             | 0               | 3               | 1                | -1.60859            |
| 1445 | 18160   | Npr1          | natriuretic peptide receptor 1                                      | 0               | 4               | 1                | -1.60845            |
| 1446 | 110385  | Pde4c         | phosphodiesterase 4C, cAMP specific                                 | 0               | 3               | 2                | -1.60807            |
| 1447 | 22757   | Zfp95         | zinc finger with KRAB and SCAN domains 5                            | 0               | 3               | 2                | -1.60657            |
| 1448 | 231798  | Lrch4         | leucine-rich repeats and calponin homology (CH) domain containing 4 | 0               | 3               | 2                | -1.6064             |
| 1449 | 21422   | Tcfcp2        | transcription factor CP2                                            | 0               | 3               | 2                | -1.60561            |
| 1450 | 19290   | Pura          | purine rich element binding protein A                               | 0               | 3               | 2                | -1.6056             |
| 1451 | 18223   | Numbl         | numb-like                                                           | 0               | 3               | 2                | -1.60482            |
| 1452 | 214897  | Csnk1g1       | casein kinase 1, gamma 1                                            | 0               | 4               | 1                | -1.60475            |
| 1453 | 50880   | Scly          | selenocysteine lyase                                                | 0               | 3               | 2                | -1.60459            |
| 1454 | 76295   | Atp11b        | ATPase, class VI, type 11B                                          | 0               | 3               | 2                | -1.60441            |
| 1455 | 72536   | Tagap         | T cell activation Rho GTPase activating protein                     | 0               | 5               | 0                | -1.60363            |
| 1456 | 217705  | 9830169C18Rik | family with sequence similarity 161, member B                       | 0               | 3               | 2                | -1.60326            |
| 1457 | 94179   | Krt1-23       | keratin 23                                                          | 0               | 4               | 1                | -1.60306            |
| 1458 | 68024   | Hist1h2bc     | histone cluster 1, H2bc                                             | 0               | 4               | 0                | -1.60271            |
| 1459 | 21873   | Tjp2          | tight junction protein 2                                            | 0               | 3               | 2                | -1.6026             |
| 1460 | 16687   | Krt2-6a       | keratin 6A                                                          | 0               | 3               | 2                | -1.60214            |
| 1461 | 235527  | Plscr4        | phospholipid scramblase 4                                           | 0               | 3               | 2                | -1.60201            |
| 1462 | 16682   | Krt2-4        | keratin 4                                                           | 0               | 3               | 2                | -1.6016             |
| 1463 | 69698   | 2310046K01Rik | RIKEN cDNA 2310046K01 gene                                          | 0               | 3               | 2                | -1.6008             |
| 1464 | 98741   | Kcnb2         | potassium voltage gated channel, Shab-related subfamily, member 2   | 0               | 3               | 2                | -1.60058            |
| 1465 | 22648   | Zfp11         | zinc finger protein 11                                              | 0               | 3               | 2                | -1.60029            |
| 1466 | 67905   | Ppm1m         | protein phosphatase 1M                                              | 0               | 3               | 2                | -1.59988            |
| 1467 | 76199   | Thrap2        | mediator complex subunit 13-like                                    | 0               | 3               | 2                | -1.59982            |
| 1468 | 73666   | Thoc3         | THO complex 3                                                       | 0               | 3               | 2                | -1.5992             |
| 1469 | 18322   | Olfir24       | olfactory receptor 24                                               | 0               | 3               | 2                | -1.59906            |
| 1470 | 18984   | Por           | P450 (cytochrome) oxidoreductase                                    | 0               | 3               | 2                | -1.59904            |
| 1471 | 26561   | Mmp23         | matrix metalloproteinase 23                                         | 0               | 3               | 2                | -1.59873            |
| 1472 | 14284   | Fosl2         | fos-like antigen 2                                                  | 0               | 3               | 2                | -1.59775            |
| 1473 | 243963  | Zfp473        | zinc finger protein 473                                             | 0               | 3               | 2                | -1.59758            |
| 1474 | 50764   | Fbxo15        | F-box protein 15                                                    | 0               | 3               | 2                | -1.59736            |
| 1475 | 210933  | Bai3          | brain-specific angiogenesis inhibitor 3                             | 0               | 3               | 2                | -1.59715            |
| 1476 | 113846  | V1ra4         | vomer nasal 1 receptor 47                                           | 0               | 3               | 2                | -1.59715            |

Candidates for positive regulators of normal growth (Fisher's)

| Rank | entrez# | Gene Symbol   | Gene name                                                                     | enriched shRNAs | depleted shRNAs | no change shRNAs | average Fold Change |
|------|---------|---------------|-------------------------------------------------------------------------------|-----------------|-----------------|------------------|---------------------|
| 1477 | 11496   | Adam22        | a disintegrin and metallopeptidase domain 22                                  | 0               | 3               | 2                | -1.59698            |
| 1478 | 16796   | Lasp1         | LIM and SH3 protein 1                                                         | 0               | 3               | 2                | -1.59688            |
| 1479 | 16563   | Kif2a         | kinesin family member 2A                                                      | 0               | 3               | 2                | -1.59675            |
| 1480 | 17067   | Ly6c          | lymphocyte antigen 6 complex, locus C1                                        | 0               | 4               | 1                | -1.59658            |
| 1481 | 258850  | Olf295        | olfactory receptor 295                                                        | 0               | 4               | 0                | -1.59637            |
| 1482 | 73656   | Ms4a6c        | membrane-spanning 4-domains, subfamily A, member 6C                           | 0               | 3               | 1                | -1.59616            |
| 1483 | 67528   | Nudt7         | nudix (nucleoside diphosphate linked moiety X)-type motif 7                   | 0               | 3               | 2                | -1.59608            |
| 1484 | 107373  | 4632417K18Rik | family with sequence similarity 111, member A                                 | 0               | 3               | 1                | -1.59476            |
| 1485 | 65099   | Irak1bp1      | interleukin-1 receptor-associated kinase 1 binding protein 1                  | 0               | 3               | 2                | -1.59461            |
| 1486 | 18285   | Odf1          | outer dense fiber of sperm tails 1                                            | 0               | 3               | 2                | -1.59415            |
| 1487 | 11690   | Alox5ap       | arachidonate 5-lipoxygenase activating protein                                | 0               | 3               | 2                | -1.59409            |
| 1488 | 60534   | Fancg         | Fanconi anemia, complementation group G                                       | 0               | 3               | 2                | -1.59405            |
| 1489 | 235631  | Tsp50         | protease, serine, 50                                                          | 0               | 4               | 1                | -1.59348            |
| 1490 | 217011  | Nle1          | notchless homolog 1 (Drosophila)                                              | 0               | 3               | 2                | -1.59258            |
| 1491 | 22245   | Uck1          | uridine-cytidine kinase 1                                                     | 0               | 4               | 1                | -1.59248            |
| 1492 | 226182  | Taf5          | TAF5 RNA polymerase II, TATA box binding protein (TBP)-associated factor      | 0               | 3               | 2                | -1.59234            |
| 1493 | 258871  | Olf298        | olfactory receptor 298                                                        | 0               | 3               | 1                | -1.591              |
| 1494 | 641227  | UNK           | NA                                                                            | 0               | 4               | 1                | -1.59068            |
| 1495 | 16524   | Kcnj9         | potassium inwardly-rectifying channel, subfamily J, member 9                  | 0               | 3               | 2                | -1.59007            |
| 1496 | 12398   | Cbfa2t3h      | core-binding factor, runt domain, alpha subunit 2, translocated to, 3 (human) | 0               | 3               | 2                | -1.58978            |
| 1497 | 19656   | Rbmxt         | RNA binding motif protein, X linked-like-1                                    | 0               | 3               | 2                | -1.58845            |
| 1498 | 72088   | Ush1c         | Usher syndrome 1C homolog (human)                                             | 0               | 3               | 2                | -1.58843            |
| 1499 | 11576   | Afp           | alpha fetoprotein                                                             | 0               | 3               | 2                | -1.58829            |
| 1500 | 15405   | Hoxa9         | homeobox A9                                                                   | 0               | 3               | 2                | -1.58816            |
| 1501 | 626662  | UNK           | NA                                                                            | 0               | 3               | 2                | -1.5881             |
| 1502 | 258695  | Olf1453       | olfactory receptor 1453                                                       | 0               | 4               | 1                | -1.58801            |
| 1503 | 72014   | 1500005102Rik | BTB (POZ) domain containing 17                                                | 0               | 3               | 2                | -1.58777            |
| 1504 | 14187   | Akr1b8        | aldo-keto reductase family 1, member B8                                       | 0               | 3               | 2                | -1.58686            |
| 1505 | 14173   | Fgf2          | fibroblast growth factor 2                                                    | 0               | 3               | 2                | -1.58574            |
| 1506 | 14608   | Gpr83         | G protein-coupled receptor 83                                                 | 0               | 3               | 1                | -1.58568            |
| 1507 | 14200   | Fhl2          | four and a half LIM domains 2                                                 | 0               | 3               | 2                | -1.58564            |
| 1508 | 20899   | Stra8         | stimulated by retinoic acid gene 8                                            | 0               | 5               | 0                | -1.58517            |
| 1509 | 258578  | Olf1517       | NA                                                                            | 0               | 3               | 2                | -1.5846             |
| 1510 | 21687   | Tek           | endothelial-specific receptor tyrosine kinase                                 | 0               | 3               | 2                | -1.58357            |
| 1511 | 105298  | Epdr2         | ependymin related protein 1 (zebrafish)                                       | 0               | 3               | 2                | -1.58283            |
| 1512 | 223337  | Ugt3a2        | UDP glycosyltransferases 3 family, polypeptide A2                             | 0               | 3               | 2                | -1.58279            |
| 1513 | 16616   | Klk1b21       | kallikrein 1-related peptidase b21                                            | 0               | 5               | 0                | -1.58251            |

Candidates for positive regulators of normal growth (Fisher's)

| Rank | entrez# | Gene Symbol   | Gene name                                                                                       | enriched shRNAs | depleted shRNAs | no change shRNAs | average Fold Change |
|------|---------|---------------|-------------------------------------------------------------------------------------------------|-----------------|-----------------|------------------|---------------------|
| 1514 | 266692  | Cpne1         | copine I                                                                                        | 0               | 3               | 2                | -1.58232            |
| 1515 | 320001  | E230015B07Rik | RIKEN cDNA E230015B07 gene                                                                      | 0               | 3               | 2                | -1.58226            |
| 1516 | 209357  | Gtf2h3        | general transcription factor IIH, polypeptide 3                                                 | 0               | 3               | 2                | -1.58214            |
| 1517 | 193403  | LOC193403     | serine (or cysteine) peptidase inhibitor, clade B pseudogene                                    | 0               | 3               | 2                | -1.58096            |
| 1518 | 234959  | Crsp6         | mediator complex subunit 17                                                                     | 0               | 3               | 2                | -1.57913            |
| 1519 | 14682   | Gnaq          | guanine nucleotide binding protein, alpha q polypeptide                                         | 0               | 3               | 2                | -1.5791             |
| 1520 | 233058  | B230312I18Rik | zinc finger protein 420                                                                         | 0               | 4               | 1                | -1.5789             |
| 1521 | 20420   | Shd           | src homology 2 domain-containing transforming protein D                                         | 0               | 3               | 1                | -1.57879            |
| 1522 | 14866   | Gstm5         | glutathione S-transferase, mu 5                                                                 | 0               | 3               | 2                | -1.57861            |
| 1523 | 15407   | Hoxb1         | homeobox B1                                                                                     | 0               | 3               | 2                | -1.57858            |
| 1524 | 69216   | Ccdc23        | coiled-coil domain containing 23                                                                | 0               | 3               | 2                | -1.57851            |
| 1525 | 16189   | Il4           | interleukin 4                                                                                   | 0               | 3               | 2                | -1.57802            |
| 1526 | 217980  | Larp5         | La ribonucleoprotein domain family, member 4B                                                   | 0               | 4               | 0                | -1.5777             |
| 1527 | 258517  | Olfir855      | olfactory receptor 855                                                                          | 0               | 3               | 2                | -1.5777             |
| 1528 | 215160  | Rhbdd2        | rhomboid domain containing 2                                                                    | 0               | 3               | 2                | -1.57738            |
| 1529 | 103551  | E130012A19Rik | RIKEN cDNA E130012A19 gene                                                                      | 0               | 3               | 2                | -1.57736            |
| 1530 | 226517  | Smg7          | Smg-7 homolog, nonsense mediated mRNA decay factor ( <i>C. elegans</i> )                        | 0               | 3               | 1                | -1.5768             |
| 1531 | 17991   | Ndufa2        | NADH dehydrogenase (ubiquinone) 1 alpha subcomplex, 2                                           | 0               | 3               | 2                | -1.57671            |
| 1532 | 13544   | Dvl3          | dishevelled 3, dsh homolog ( <i>Drosophila</i> )                                                | 0               | 3               | 2                | -1.57657            |
| 1533 | 69681   | Cdk3          | cyclin-dependent kinase 3, pseudogene                                                           | 0               | 3               | 2                | -1.57644            |
| 1534 | 234779  | Plcg2         | phospholipase C, gamma 2                                                                        | 0               | 3               | 2                | -1.57634            |
| 1535 | 15450   | Lipc          | lipase, hepatic                                                                                 | 0               | 4               | 1                | -1.57613            |
| 1536 | 107448  | Unc5a         | unc-5 homolog A ( <i>C. elegans</i> )                                                           | 0               | 3               | 2                | -1.57603            |
| 1537 | 13531   | Dub1          | deubiquitinating enzyme 1                                                                       | 0               | 3               | 2                | -1.57572            |
| 1538 | 269338  | Vps39         | vacuolar protein sorting 39 (yeast)                                                             | 0               | 3               | 2                | -1.57562            |
| 1539 | 77031   | Slc9a8        | solute carrier family 9 (sodium/hydrogen exchanger), member 8                                   | 0               | 3               | 2                | -1.57557            |
| 1540 | 18117   | Cox4nb        | COX4 neighbor                                                                                   | 0               | 4               | 0                | -1.57526            |
| 1541 | 245877  | Rprc1         | microtubule-associated protein 7 domain containing 1                                            | 0               | 4               | 1                | -1.57487            |
| 1542 | 18164   | Nptx1         | neuronal pentraxin 1                                                                            | 0               | 3               | 1                | -1.57483            |
| 1543 | 18140   | Uhrf1         | ubiquitin-like, containing PHD and RING finger domains, 1                                       | 0               | 3               | 2                | -1.57459            |
| 1544 | 67150   | Rnf141        | ring finger protein 141                                                                         | 0               | 4               | 1                | -1.57439            |
| 1545 | 26456   | Sema4g        | sema domain, immunoglobulin domain (Ig), transmembrane domain (TM) and short cytoplasmic domain | 0               | 3               | 2                | -1.57412            |
| 1546 | 109075  | Exosc4        | exosome component 4                                                                             | 0               | 3               | 2                | -1.57407            |
| 1547 | 19895   | Rpia          | ribose 5-phosphate isomerase A                                                                  | 0               | 4               | 0                | -1.5735             |
| 1548 | 64378   | Gpr88         | G-protein coupled receptor 88                                                                   | 0               | 3               | 2                | -1.57317            |
| 1549 | 20276   | Scnn1a        | sodium channel, nonvoltage-gated 1 alpha                                                        | 0               | 4               | 1                | -1.57309            |
| 1550 | 93967   | Klra20        | killer cell lectin-like receptor subfamily A, member 20                                         | 0               | 3               | 2                | -1.57277            |

Candidates for positive regulators of normal growth (Fisher's)

| Rank | entrez# | Gene Symbol   | Gene name                                                                      | enriched shRNAs | depleted shRNAs | no change shRNAs | average Fold Change |
|------|---------|---------------|--------------------------------------------------------------------------------|-----------------|-----------------|------------------|---------------------|
| 1551 | 67272   | Cmtm5         | CKLF-like MARVEL transmembrane domain containing 5                             | 0               | 3               | 2                | -1.57185            |
| 1552 | 218865  | Chdh          | choline dehydrogenase                                                          | 0               | 3               | 2                | -1.57123            |
| 1553 | 56496   | Tspan6        | tetraspanin 6                                                                  | 0               | 4               | 1                | -1.57115            |
| 1554 | 21855   | Timm17b       | translocase of inner mitochondrial membrane 17b                                | 0               | 3               | 2                | -1.57079            |
| 1555 | 65100   | Zic5          | zinc finger protein of the cerebellum 5                                        | 0               | 3               | 2                | -1.57064            |
| 1556 | 258453  | Olfir1209     | olfactory receptor 1209                                                        | 0               | 3               | 2                | -1.5705             |
| 1557 | 67395   | 4930403L05Rik | protein phosphatase 1, regulatory (inhibitor) subunit 2, pseudogene 9          | 0               | 5               | 0                | -1.56996            |
| 1558 | 15959   | Ifit3         | interferon-induced protein with tetratricopeptide repeats 3                    | 0               | 3               | 2                | -1.56954            |
| 1559 | 594844  | Tceal3        | transcription elongation factor A (SII)-like 3                                 | 0               | 3               | 1                | -1.56907            |
| 1560 | 235316  | UNK           | NA                                                                             | 0               | 3               | 2                | -1.56899            |
| 1561 | 67778   | Zfp639        | zinc finger protein 639                                                        | 0               | 3               | 2                | -1.56889            |
| 1562 | 497106  | Rnase12       | ribonuclease, RNase A family, 12 (non-active)                                  | 0               | 3               | 2                | -1.56871            |
| 1563 | 19132   | Prph1         | peripherin                                                                     | 0               | 4               | 1                | -1.56869            |
| 1564 | 67106   | Zbtb8os       | zinc finger and BTB domain containing 8 opposite strand                        | 0               | 3               | 2                | -1.56867            |
| 1565 | 20471   | Six1          | sine oculis-related homeobox 1 homolog (Drosophila)                            | 0               | 3               | 2                | -1.56839            |
| 1566 | 20851   | Stat5b        | signal transducer and activator of transcription 5B                            | 0               | 3               | 2                | -1.56798            |
| 1567 | 26396   | Map2k2        | mitogen-activated protein kinase kinase 2                                      | 0               | 5               | 5                | -1.56773            |
| 1568 | 216781  | Trim58        | tripartite motif-containing 58                                                 | 0               | 3               | 2                | -1.56714            |
| 1569 | 381574  | UNK           | NA                                                                             | 0               | 3               | 2                | -1.56645            |
| 1570 | 381358  | LOC381358     | NA                                                                             | 0               | 4               | 6                | -1.56602            |
| 1571 | 12549   | Cdgap         | Rho GTPase activating protein 31                                               | 0               | 3               | 2                | -1.56597            |
| 1572 | 14601   | Ghrh          | growth hormone releasing hormone                                               | 0               | 3               | 2                | -1.56564            |
| 1573 | 75717   | Cul5          | cullin 5                                                                       | 0               | 3               | 2                | -1.56542            |
| 1574 | 170935  | Grid2ip       | glutamate receptor, ionotropic, delta 2 (Grid2) interacting protein 1          | 0               | 3               | 2                | -1.56527            |
| 1575 | 66506   | 1810042K04Rik | proteasome (prosome, macropain) assembly chaperone 3                           | 0               | 5               | 0                | -1.56526            |
| 1576 | 240095  | D130003B22Rik | histocompatibility 2, M region locus 5                                         | 0               | 3               | 2                | -1.56479            |
| 1577 | 213484  | Nudt18        | nudix (nucleoside diphosphate linked moiety X)-type motif 18                   | 0               | 4               | 1                | -1.56473            |
| 1578 | 12345   | Capzb         | capping protein (actin filament) muscle Z-line, beta                           | 0               | 3               | 1                | -1.56459            |
| 1579 | 11520   | Adfp          | perilipin 2                                                                    | 0               | 3               | 2                | -1.56414            |
| 1580 | 22165   | Txk           | TXK tyrosine kinase                                                            | 0               | 3               | 2                | -1.56401            |
| 1581 | 235293  | Sc5d          | sterol-C5-desaturase (fungal ERG3, delta-5-desaturase) homolog (S. cerevisiae) | 0               | 3               | 2                | -1.564              |
| 1582 | 101502  | Hsd3b7        | hydroxy-delta-5-steroid dehydrogenase, 3 beta- and steroid delta-isomerase 7   | 0               | 3               | 2                | -1.56391            |
| 1583 | 67145   | Tomm34        | translocase of outer mitochondrial membrane 34                                 | 0               | 4               | 1                | -1.56352            |
| 1584 | 56031   | Ppie          | peptidylprolyl isomerase E (cyclophilin E)                                     | 0               | 4               | 1                | -1.56346            |
| 1585 | 18146   | Npdc1         | neural proliferation, differentiation and control gene 1                       | 0               | 4               | 1                | -1.56286            |
| 1586 | 27373   | Csnk1e        | casein kinase 1, epsilon                                                       | 0               | 3               | 1                | -1.5624             |
| 1587 | 17293   | Mesp2         | mesoderm posterior 2                                                           | 0               | 5               | 0                | -1.56211            |

Candidates for positive regulators of normal growth (Fisher's)

| Rank | entrez# | Gene Symbol   | Gene name                                                                                             | enriched shRNAs | depleted shRNAs | no change shRNAs | average Fold Change |
|------|---------|---------------|-------------------------------------------------------------------------------------------------------|-----------------|-----------------|------------------|---------------------|
| 1588 | 244144  | Usp35         | ubiquitin specific peptidase 35                                                                       | 0               | 4               | 1                | -1.56179            |
| 1589 | 75083   | Usp50         | ubiquitin specific peptidase 50                                                                       | 0               | 4               | 1                | -1.56172            |
| 1590 | 16149   | Cd74          | CD74 antigen (invariant polypeptide of major histocompatibility complex, class II antigen-associated) | 0               | 3               | 2                | -1.56119            |
| 1591 | 436380  | UNK           | NA                                                                                                    | 0               | 3               | 2                | -1.56097            |
| 1592 | 69601   | Dab2ip        | disabled homolog 2 (Drosophila) interacting protein                                                   | 0               | 3               | 2                | -1.5605             |
| 1593 | 338367  | Myo1d         | myosin ID                                                                                             | 0               | 3               | 2                | -1.56018            |
| 1594 | 12427   | Ccna1         | cyclin A1                                                                                             | 0               | 4               | 1                | -1.55952            |
| 1595 | 11486   | Ada           | adenosine deaminase                                                                                   | 0               | 3               | 2                | -1.55933            |
| 1596 | 433259  | LOC433259     | NA                                                                                                    | 0               | 3               | 2                | -1.55912            |
| 1597 | 19883   | Rora          | RAR-related orphan receptor alpha                                                                     | 0               | 4               | 6                | -1.5577             |
| 1598 | 218772  | Rarb          | retinoic acid receptor, beta                                                                          | 0               | 3               | 2                | -1.55724            |
| 1599 | 382590  | UNK           | NA                                                                                                    | 0               | 3               | 2                | -1.55714            |
| 1600 | 317757  | Gimap5        | GTPase, IMAP family member 5                                                                          | 0               | 3               | 2                | -1.55661            |
| 1601 | 16480   | Jup           | junction plakoglobin                                                                                  | 0               | 3               | 2                | -1.55661            |
| 1602 | 67862   | 2310033P09Rik | RIKEN cDNA 2310033P09 gene                                                                            | 0               | 3               | 2                | -1.55527            |
| 1603 | 434656  | UNK           | NA                                                                                                    | 0               | 4               | 1                | -1.55498            |
| 1604 | 14251   | Flot1         | flotillin 1                                                                                           | 0               | 3               | 2                | -1.55495            |
| 1605 | 66839   | 0610009O20Rik | RIKEN cDNA 0610009O20 gene                                                                            | 0               | 3               | 2                | -1.55478            |
| 1606 | 57278   | Bcam          | basal cell adhesion molecule                                                                          | 0               | 3               | 2                | -1.55476            |
| 1607 | 110355  | Adrbk1        | adrenergic receptor kinase, beta 1                                                                    | 0               | 3               | 2                | -1.55467            |
| 1608 | 385234  | LOC385234     | predicted gene 5376                                                                                   | 0               | 3               | 2                | -1.55452            |
| 1609 | 433182  | LOC433182     | predicted gene 5506                                                                                   | 0               | 4               | 1                | -1.55395            |
| 1610 | 192976  | BC046404      | cDNA sequence BC046404                                                                                | 0               | 4               | 1                | -1.55362            |
| 1611 | 30954   | Siva          | SIVA1, apoptosis-inducing factor                                                                      | 0               | 3               | 2                | -1.55299            |
| 1612 | 69159   | Rhebl1        | Ras homolog enriched in brain like 1                                                                  | 0               | 4               | 1                | -1.55284            |
| 1613 | 17769   | Mthfr         | 5,10-methylenetetrahydrofolate reductase                                                              | 0               | 3               | 2                | -1.55284            |
| 1614 | 72482   | Acbd6         | acyl-Coenzyme A binding domain containing 6                                                           | 0               | 3               | 2                | -1.55279            |
| 1615 | 106707  | Rpusd1        | RNA pseudouridylate synthase domain containing 1                                                      | 0               | 3               | 2                | -1.55248            |
| 1616 | 53378   | Sdcbp         | syndecan binding protein                                                                              | 0               | 3               | 2                | -1.5519             |
| 1617 | 56009   | Refbp2        | Aly/REF export factor 2                                                                               | 0               | 3               | 2                | -1.55187            |
| 1618 | 22275   | Urod          | uroporphyrinogen decarboxylase                                                                        | 0               | 3               | 2                | -1.55139            |
| 1619 | 58187   | Cldn10        | claudin 10                                                                                            | 0               | 3               | 2                | -1.55125            |
| 1620 | 108927  | Lhfp          | lipoma HMGIC fusion partner                                                                           | 0               | 3               | 2                | -1.55037            |
| 1621 | 12176   | Bnip3         | BCL2/adenovirus E1B interacting protein 3                                                             | 0               | 4               | 1                | -1.5501             |
| 1622 | 434436  | LOC434436     | cDNA sequence BY080835                                                                                | 0               | 3               | 2                | -1.5501             |
| 1623 | 11418   | Accn1         | amiloride-sensitive cation channel 1, neuronal (degenerin)                                            | 0               | 3               | 2                | -1.55007            |
| 1624 | 75553   | Zc3h14        | zinc finger CCCH type containing 14                                                                   | 0               | 4               | 1                | -1.54948            |

Candidates for positive regulators of normal growth (Fisher's)

| Rank | entrez# | Gene Symbol   | Gene name                                                      | enriched shRNAs | depleted shRNAs | no change shRNAs | average Fold Change |
|------|---------|---------------|----------------------------------------------------------------|-----------------|-----------------|------------------|---------------------|
| 1625 | 54128   | Pmm2          | phosphomannomutase 2                                           | 0               | 3               | 2                | -1.54944            |
| 1626 | 12808   | Cobl          | cordon-bleu                                                    | 0               | 3               | 2                | -1.54936            |
| 1627 | 11853   | Rhoc          | ras homolog gene family, member C                              | 0               | 3               | 2                | -1.54919            |
| 1628 | 70560   | Wars2         | tryptophanyl tRNA synthetase 2 (mitochondrial)                 | 0               | 3               | 2                | -1.549              |
| 1629 | 231842  | 6530401C20Rik | archaelysin family metalloproteinase 1                         | 0               | 4               | 1                | -1.54897            |
| 1630 | 18830   | Pltp          | phospholipid transfer protein                                  | 0               | 3               | 1                | -1.54873            |
| 1631 | 57740   | Stk32c        | serine/threonine kinase 32C                                    | 0               | 5               | 0                | -1.54848            |
| 1632 | 76501   | Comm9         | COMM domain containing 9                                       | 0               | 3               | 1                | -1.54815            |
| 1633 | 69094   | Tmem160       | transmembrane protein 160                                      | 0               | 3               | 2                | -1.54805            |
| 1634 | 76894   | Mett5d1       | methyltransferase like 15                                      | 0               | 4               | 1                | -1.54765            |
| 1635 | 77891   | Ube2s         | ubiquitin-conjugating enzyme E2S                               | 0               | 4               | 6                | -1.54743            |
| 1636 | 243755  | Slc13a4       | solute carrier family 13 (sodium/sulfate symporters), member 4 | 0               | 4               | 1                | -1.54724            |
| 1637 | 18789   | Papola        | poly (A) polymerase alpha                                      | 0               | 3               | 1                | -1.54723            |
| 1638 | 12896   | Cpt2          | carnitine palmitoyltransferase 2                               | 0               | 3               | 2                | -1.54712            |
| 1639 | 107375  | AW491445      | solute carrier family 25, member 45                            | 0               | 3               | 2                | -1.54626            |
| 1640 | 20850   | Stat5a        | signal transducer and activator of transcription 5A            | 0               | 3               | 2                | -1.54601            |
| 1641 | 50774   | Krtap5-1      | keratin associated protein 5-1                                 | 0               | 3               | 2                | -1.54589            |
| 1642 | 103742  | 1810046J19Rik | RIKEN cDNA 1810046J19 gene                                     | 0               | 3               | 1                | -1.54563            |
| 1643 | 75572   | Acyp2         | acylphosphatase 2, muscle type                                 | 0               | 4               | 1                | -1.54551            |
| 1644 | 66664   | Tmem41a       | transmembrane protein 41a                                      | 0               | 3               | 2                | -1.54536            |
| 1645 | 56442   | Serinc1       | serine incorporator 1                                          | 0               | 3               | 2                | -1.54534            |
| 1646 | 258584  | Olf1101       | olfactory receptor 1101                                        | 0               | 3               | 1                | -1.54513            |
| 1647 | 68146   | Arl13b        | ADP-ribosylation factor-like 13B                               | 0               | 3               | 2                | -1.54504            |
| 1648 | 53328   | Pgrmc1        | progesterone receptor membrane component 1                     | 0               | 3               | 2                | -1.54474            |
| 1649 | 228543  | Rhov          | ras homolog gene family, member V                              | 0               | 4               | 1                | -1.54444            |
| 1650 | 21854   | Timm17a       | translocase of inner mitochondrial membrane 17a                | 0               | 3               | 2                | -1.54417            |
| 1651 | 69806   | Slc39a11      | solute carrier family 39 (metal ion transporter), member 11    | 0               | 3               | 2                | -1.54406            |
| 1652 | 70239   | Gtf3c5        | general transcription factor IIIC, polypeptide 5               | 0               | 3               | 2                | -1.54329            |
| 1653 | 230396  | Ifna13        | interferon alpha 13                                            | 0               | 3               | 2                | -1.54285            |
| 1654 | 21991   | Tpi1          | triosephosphate isomerase 1                                    | 0               | 3               | 2                | -1.54239            |
| 1655 | 15451   | Hpn           | hepsin                                                         | 0               | 4               | 6                | -1.54225            |
| 1656 | 69816   | 2010001M09Rik | RIKEN cDNA 2010001M09 gene                                     | 0               | 3               | 2                | -1.54218            |
| 1657 | 57435   | S3-12         | perilipin 4                                                    | 0               | 3               | 2                | -1.54182            |
| 1658 | 75660   | 1810054G18Rik | lin-37 homolog (C. elegans)                                    | 0               | 3               | 1                | -1.5417             |
| 1659 | 20168   | Rtn3          | reticulon 3                                                    | 0               | 3               | 2                | -1.54096            |
| 1660 | 225929  | AV312086      | protein associated with topoisomerase II homolog 1 (yeast)     | 0               | 3               | 2                | -1.54056            |
| 1661 | 113856  | V1rb8         | vomeroneasal 1 receptor 46                                     | 0               | 3               | 2                | -1.54053            |



Candidates for positive regulators of normal growth (Fisher's)

| Rank | entrez# | Gene Symbol   | Gene name                                                                    | enriched shRNAs | depleted shRNAs | no change shRNAs | average Fold Change |
|------|---------|---------------|------------------------------------------------------------------------------|-----------------|-----------------|------------------|---------------------|
| 1662 | 319184  | Hist1h2bk     | histone cluster 1, H2bk                                                      | 0               | 3               | 2                | -1.54044            |
| 1663 | 106326  | Osbpl11       | oxysterol binding protein-like 11                                            | 0               | 4               | 1                | -1.53971            |
| 1664 | 329248  | UNK           | NA                                                                           | 0               | 3               | 2                | -1.53961            |
| 1665 | 14582   | Gfi1b         | growth factor independent 1B                                                 | 0               | 3               | 2                | -1.53935            |
| 1666 | 432604  | UNK           | NA                                                                           | 0               | 4               | 1                | -1.53927            |
| 1667 | 105245  | Txndc5        | thioredoxin domain containing 5                                              | 0               | 4               | 1                | -1.53907            |
| 1668 | 231329  | Polr2b        | polymerase (RNA) II (DNA directed) polypeptide B                             | 0               | 3               | 2                | -1.53885            |
| 1669 | 16881   | Lig1          | ligase I, DNA, ATP-dependent                                                 | 0               | 4               | 1                | -1.53878            |
| 1670 | 27390   | Mmel1         | membrane metallo-endopeptidase-like 1                                        | 0               | 4               | 1                | -1.53851            |
| 1671 | 18628   | Per3          | period homolog 3 (Drosophila)                                                | 0               | 4               | 1                | -1.5385             |
| 1672 | 16210   | Impact        | imprinted and ancient                                                        | 0               | 3               | 1                | -1.53839            |
| 1673 | 64697   | Keg1          | kidney expressed gene 1                                                      | 0               | 3               | 2                | -1.53807            |
| 1674 | 258372  | Olf918        | olfactory receptor 918                                                       | 0               | 3               | 1                | -1.53806            |
| 1675 | 67979   | Atad1         | ATPase family, AAA domain containing 1                                       | 0               | 4               | 1                | -1.53772            |
| 1676 | 56644   | Clec7a        | C-type lectin domain family 7, member a                                      | 0               | 3               | 2                | -1.53741            |
| 1677 | 258390  | Olf1276       | olfactory receptor 1276                                                      | 0               | 3               | 2                | -1.53728            |
| 1678 | 216178  | UNK           | NA                                                                           | 0               | 3               | 2                | -1.5353             |
| 1679 | 94089   | Trim7         | tripartite motif-containing 7                                                | 0               | 3               | 2                | -1.53494            |
| 1680 | 215415  | Gm555         | NA                                                                           | 0               | 3               | 2                | -1.53476            |
| 1681 | 20931   | Surf2         | surfeit gene 2                                                               | 0               | 4               | 1                | -1.5347             |
| 1682 | 18000   | 39326         | septin 2                                                                     | 0               | 4               | 1                | -1.53443            |
| 1683 | 16008   | Igfbp2        | insulin-like growth factor binding protein 2                                 | 0               | 4               | 1                | -1.53442            |
| 1684 | 226421  | 5430435G22Rik | RIKEN cDNA 5430435G22 gene                                                   | 0               | 3               | 2                | -1.53431            |
| 1685 | 13548   | Dyrk1a        | dual-specificity tyrosine-(Y)-phosphorylation regulated kinase 1a            | 0               | 3               | 2                | -1.5339             |
| 1686 | 18566   | Pdcd1         | programmed cell death 1                                                      | 0               | 4               | 1                | -1.53342            |
| 1687 | 16971   | Lrp1          | low density lipoprotein receptor-related protein 1                           | 0               | 3               | 2                | -1.53338            |
| 1688 | 18162   | Npr3          | natriuretic peptide receptor 3                                               | 0               | 4               | 6                | -1.5333             |
| 1689 | 17229   | Mcpt6         | tryptase beta 2                                                              | 0               | 3               | 2                | -1.53313            |
| 1690 | 50772   | Mapk6         | mitogen-activated protein kinase 6                                           | 0               | 3               | 2                | -1.53219            |
| 1691 | 17207   | Mcf2l         | mcf.2 transforming sequence-like                                             | 0               | 4               | 1                | -1.53205            |
| 1692 | 385499  | LOC385499     | predicted pseudogene 5401                                                    | 0               | 5               | 0                | -1.53176            |
| 1693 | 258353  | Olf521        | olfactory receptor 521                                                       | 0               | 3               | 1                | -1.53176            |
| 1694 | 53895   | Clpp          | caseinolytic peptidase, ATP-dependent, proteolytic subunit homolog (E. coli) | 0               | 3               | 2                | -1.53167            |
| 1695 | 15977   | Ifnb1         | interferon beta 1, fibroblast                                                | 0               | 3               | 2                | -1.53167            |
| 1696 | 18088   | Nkx2-2        | NK2 transcription factor related, locus 2 (Drosophila)                       | 0               | 3               | 2                | -1.53099            |
| 1697 | 240754  | Lax1          | lymphocyte transmembrane adaptor 1                                           | 0               | 3               | 1                | -1.5308             |
| 1698 | 27219   | Sgk2          | serum/glucocorticoid regulated kinase 2                                      | 0               | 3               | 2                | -1.53076            |

## Candidates for positive regulators of normal growth (Fisher's)

| Rank | entrez# | Gene Symbol   | Gene name                                             | enriched shRNAs | depleted shRNAs | no change shRNAs | average Fold Change |
|------|---------|---------------|-------------------------------------------------------|-----------------|-----------------|------------------|---------------------|
| 1699 | 13481   | Dpm2          | dolichol-phosphate (beta-D) mannosyltransferase 2     | 0               | 3               | 2                | -1.53041            |
| 1700 | 22778   | Zfpn1a1       | IKAROS family zinc finger 1                           | 0               | 3               | 2                | -1.53031            |
| 1701 | 214855  | Arid5a        | AT rich interactive domain 5A (MRF1-like)             | 0               | 3               | 1                | -1.52976            |
| 1702 | 107568  | Wwp1          | WW domain containing E3 ubiquitin protein ligase 1    | 0               | 4               | 1                | -1.52965            |
| 1703 | 50780   | Rgs3          | regulator of G-protein signaling 3                    | 0               | 4               | 1                | -1.52936            |
| 1704 | 19111   | Prlpb         | prolactin family 6, subfamily a, member 1             | 0               | 5               | 0                | -1.52932            |
| 1705 | 11833   | Aqp8          | aquaporin 8                                           | 0               | 3               | 2                | -1.52805            |
| 1706 | 13226   | Defcr-rs7     | defensin, alpha, related sequence 7                   | 0               | 4               | 1                | -1.528              |
| 1707 | 12122   | Bid           | BH3 interacting domain death agonist                  | 0               | 3               | 2                | -1.52774            |
| 1708 | 69269   | Scnm1         | sodium channel modifier 1                             | 0               | 4               | 1                | -1.5277             |
| 1709 | 76025   | Cant1         | calcium activated nucleotidase 1                      | 0               | 3               | 2                | -1.52731            |
| 1710 | 58205   | Pdcd1lg2      | programmed cell death 1 ligand 2                      | 0               | 5               | 0                | -1.5272             |
| 1711 | 83430   | Il23a         | interleukin 23, alpha subunit p19                     | 0               | 4               | 1                | -1.52701            |
| 1712 | 212919  | Kctd7         | potassium channel tetramerisation domain containing 7 | 0               | 3               | 2                | -1.52699            |
| 1713 | 21432   | Tcl1          | T cell lymphoma breakpoint 1                          | 0               | 4               | 1                | -1.52649            |
| 1714 | 20277   | Scnn1b        | sodium channel, nonvoltage-gated 1 beta               | 0               | 3               | 2                | -1.52636            |
| 1715 | 233824  | Cog7          | component of oligomeric golgi complex 7               | 0               | 3               | 2                | -1.52606            |
| 1716 | 56869   | Zfp109        | zinc finger protein 109                               | 0               | 3               | 2                | -1.5258             |
| 1717 | 66898   | Baiap21       | BAI1-associated protein 2-like 1                      | 0               | 4               | 1                | -1.5257             |
| 1718 | 442804  | A130066N16Rik | RIKEN cDNA A130066N16 gene                            | 0               | 3               | 2                | -1.52505            |
| 1719 | 93674   | Cml3          | camello-like 3                                        | 0               | 3               | 2                | -1.52399            |
| 1720 | 214639  | 4930486L24Rik | RIKEN cDNA 4930486L24 gene                            | 0               | 4               | 1                | -1.52384            |
| 1721 | 67759   | 5033414D02Rik | RIKEN cDNA 5033414D02 gene                            | 0               | 3               | 2                | -1.52373            |
| 1722 | 435499  | LOC435499     | kinesin family member 2C pseudogene                   | 0               | 4               | 1                | -1.52367            |
| 1723 | 76580   | Mib2          | mindbomb homolog 2 (Drosophila)                       | 0               | 4               | 1                | -1.52345            |
| 1724 | 75870   | Tcam1         | testicular cell adhesion molecule 1                   | 0               | 3               | 2                | -1.52305            |
| 1725 | 19659   | Rbp1          | retinol binding protein 1, cellular                   | 0               | 4               | 1                | -1.52301            |
| 1726 | 15433   | Hoxd13        | homeobox D13                                          | 0               | 3               | 2                | -1.52252            |
| 1727 | 230775  | Bai2          | brain-specific angiogenesis inhibitor 2               | 0               | 3               | 2                | -1.52217            |
| 1728 | 14168   | Fgf13         | fibroblast growth factor 13                           | 0               | 3               | 2                | -1.52154            |
| 1729 | 109246  | Tspan9        | tetraspanin 9                                         | 0               | 3               | 2                | -1.52087            |
| 1730 | 406220  | 4732484G22Rik | keratin 77                                            | 0               | 3               | 1                | -1.52085            |
| 1731 | 385236  | UNK           | NA                                                    | 0               | 3               | 2                | -1.52074            |
| 1732 | 12351   | Car4          | carbonic anhydrase 4                                  | 0               | 3               | 2                | -1.5205             |
| 1733 | 76560   | Prss8         | protease, serine, 8 (prostasin)                       | 0               | 3               | 2                | -1.52005            |
| 1734 | 12954   | Cryaa         | crystallin, alpha A                                   | 0               | 3               | 2                | -1.51923            |
| 1735 | 20388   | Sftpb         | surfactant associated protein B                       | 0               | 3               | 2                | -1.51922            |

Candidates for positive regulators of normal growth (Fisher's)

| Rank | entrez# | Gene Symbol | Gene name                                                                     | enriched shRNAs | depleted shRNAs | no change shRNAs | average Fold Change |
|------|---------|-------------|-------------------------------------------------------------------------------|-----------------|-----------------|------------------|---------------------|
| 1736 | 69654   | Dctn2       | dynactin 2                                                                    | 0               | 4               | 1                | -1.51907            |
| 1737 | 15402   | Hoxa5       | homeobox A5                                                                   | 0               | 3               | 2                | -1.51825            |
| 1738 | 20084   | Rps18       | ribosomal protein S18                                                         | 0               | 3               | 2                | -1.51817            |
| 1739 | 14874   | Gstz1       | glutathione transferase zeta 1 (maleylacetoacetate isomerase)                 | 0               | 3               | 2                | -1.51718            |
| 1740 | 67868   | Ela3        | chymotrypsin-like elastase family, member 3B                                  | 0               | 3               | 2                | -1.51652            |
| 1741 | 234964  | Ccdc67      | coiled-coil domain containing 67                                              | 0               | 3               | 1                | -1.51635            |
| 1742 | 229395  | UNK         | NA                                                                            | 0               | 3               | 2                | -1.51616            |
| 1743 | 20595   | Smn1        | survival motor neuron 1                                                       | 0               | 3               | 2                | -1.51564            |
| 1744 | 192163  | Pcdha3      | protocadherin alpha 3                                                         | 0               | 3               | 2                | -1.51559            |
| 1745 | 107029  | Me2         | malic enzyme 2, NAD(+)-dependent, mitochondrial                               | 0               | 3               | 2                | -1.51544            |
| 1746 | 74309   | Osbp2       | oxysterol binding protein 2                                                   | 0               | 3               | 2                | -1.51539            |
| 1747 | 234395  | Ushbp1      | Usher syndrome 1C binding protein 1                                           | 0               | 3               | 2                | -1.51524            |
| 1748 | 66464   | Taf12       | TAF12 RNA polymerase II, TATA box binding protein (TBP)-associated factor     | 0               | 3               | 2                | -1.51491            |
| 1749 | 13549   | Dyrk1b      | dual-specificity tyrosine-(Y)-phosphorylation regulated kinase 1b             | 0               | 3               | 2                | -1.51449            |
| 1750 | 26385   | Gprk6       | G protein-coupled receptor kinase 6                                           | 0               | 3               | 2                | -1.51434            |
| 1751 | 27416   | Abcc5       | ATP-binding cassette, sub-family C (CFTR/MRP), member 5                       | 0               | 4               | 1                | -1.51432            |
| 1752 | 18226   | Nup62       | nucleoporin 62                                                                | 0               | 4               | 1                | -1.51279            |
| 1753 | 15464   | Hrc         | histidine rich calcium binding protein                                        | 0               | 5               | 0                | -1.51244            |
| 1754 | 19293   | Pvalb       | parvalbumin                                                                   | 0               | 3               | 2                | -1.5124             |
| 1755 | 226652  | Arhgap30    | Rho GTPase activating protein 30                                              | 0               | 3               | 2                | -1.51203            |
| 1756 | 433680  | UNK         | NA                                                                            | 0               | 3               | 2                | -1.51137            |
| 1757 | 20512   | Slc1a3      | solute carrier family 1 (glial high affinity glutamate transporter), member 3 | 0               | 3               | 2                | -1.51108            |
| 1758 | 109042  | Prkcdp      | protein kinase C, delta binding protein                                       | 0               | 3               | 2                | -1.51079            |
| 1759 | 226778  | Mark1       | MAP/microtubule affinity-regulating kinase 1                                  | 0               | 3               | 2                | -1.51054            |
| 1760 | 19824   | Trim10      | tripartite motif-containing 10                                                | 0               | 3               | 2                | -1.51047            |
| 1761 | 20135   | Rrm2        | ribonucleotide reductase M2                                                   | 0               | 4               | 6                | -1.51033            |
| 1762 | 432734  | UNK         | NA                                                                            | 0               | 3               | 2                | -1.51007            |
| 1763 | 57260   | Ltb4r2      | leukotriene B4 receptor 2                                                     | 0               | 3               | 2                | -1.50971            |
| 1764 | 100087  | Kti12       | KTI12 homolog, chromatin associated ( <i>S. cerevisiae</i> )                  | 0               | 3               | 2                | -1.50948            |
| 1765 | 76367   | Trp53rk     | transformation related protein 53 regulating kinase                           | 0               | 3               | 2                | -1.50935            |
| 1766 | 83493   | Sacm11      | SAC1 (suppressor of actin mutations 1, homolog)-like ( <i>S. cerevisiae</i> ) | 0               | 3               | 2                | -1.50909            |
| 1767 | 20908   | Stx3        | syntaxin 3                                                                    | 0               | 3               | 2                | -1.50876            |
| 1768 | 17299   | Mettl1      | methyltransferase like 1                                                      | 0               | 3               | 2                | -1.50821            |
| 1769 | 26412   | Map4k2      | mitogen-activated protein kinase kinase kinase kinase 2                       | 0               | 3               | 2                | -1.50808            |
| 1770 | 53859   | Map3k14     | mitogen-activated protein kinase kinase kinase 14                             | 0               | 3               | 2                | -1.50788            |
| 1771 | 224923  | UNK         | NA                                                                            | 0               | 3               | 2                | -1.50782            |
| 1772 | 54698   | Crtam       | cytotoxic and regulatory T cell molecule                                      | 0               | 3               | 2                | -1.50761            |

Candidates for positive regulators of normal growth (Fisher's)

| Rank | entrez# | Gene Symbol   | Gene name                                                                             | enriched shRNAs | depleted shRNAs | no change shRNAs | average Fold Change |
|------|---------|---------------|---------------------------------------------------------------------------------------|-----------------|-----------------|------------------|---------------------|
| 1773 | 66483   | Rpl36al       | ribosomal protein L36A-like                                                           | 0               | 3               | 2                | -1.50756            |
| 1774 | 27424   | Klra16        | killer cell lectin-like receptor, subfamily A, member 16                              | 0               | 4               | 1                | -1.50741            |
| 1775 | 228361  | D030051N19Rik | autophagy/beclin 1 regulator 1                                                        | 0               | 4               | 1                | -1.50736            |
| 1776 | 14008   | Etv2          | ets variant gene 2                                                                    | 0               | 3               | 2                | -1.50734            |
| 1777 | 12837   | Col8a1        | collagen, type VIII, alpha 1                                                          | 0               | 3               | 2                | -1.50719            |
| 1778 | 215085  | Slc35f1       | solute carrier family 35, member F1                                                   | 0               | 3               | 2                | -1.50685            |
| 1779 | 94232   | Ubqln4        | ubiquilin 4                                                                           | 0               | 3               | 2                | -1.50643            |
| 1780 | 19703   | Renbp         | renin binding protein                                                                 | 0               | 3               | 2                | -1.50625            |
| 1781 | 11634   | Aire          | autoimmune regulator (autoimmune polyendocrinopathy candidiasis ectodermal dystrophy) | 0               | 3               | 2                | -1.50612            |
| 1782 | 13656   | Egr4          | early growth response 4                                                               | 0               | 3               | 2                | -1.50612            |
| 1783 | 76072   | Rnf183        | ring finger protein 183                                                               | 0               | 3               | 1                | -1.50575            |
| 1784 | 12968   | Cryge         | crystallin, gamma E                                                                   | 0               | 3               | 2                | -1.50571            |
| 1785 | 16520   | Kcnj4         | potassium inwardly-rectifying channel, subfamily J, member 4                          | 0               | 3               | 2                | -1.50556            |
| 1786 | 231836  | LOC231836     | predicted gene 4869                                                                   | 0               | 3               | 2                | -1.50524            |
| 1787 | 12035   | Bcat1         | branched chain aminotransferase 1, cytosolic                                          | 0               | 3               | 2                | -1.50472            |
| 1788 | 15421   | Hoxc12        | homeobox C12                                                                          | 0               | 4               | 1                | -1.50409            |
| 1789 | 64685   | Nmi           | N-myc (and STAT) interactor                                                           | 0               | 3               | 2                | -1.50402            |
| 1790 | 12406   | Serpinh1      | serine (or cysteine) peptidase inhibitor, clade H, member 1                           | 0               | 3               | 2                | -1.50343            |
| 1791 | 433641  | UNK           | NA                                                                                    | 0               | 3               | 2                | -1.50248            |
| 1792 | 11657   | Alb1          | albumin                                                                               | 0               | 3               | 2                | -1.50242            |
| 1793 | 74747   | Ddit4         | DNA-damage-inducible transcript 4                                                     | 0               | 3               | 2                | -1.50214            |
| 1794 | 224132  | Dirc2         | disrupted in renal carcinoma 2 (human)                                                | 0               | 3               | 2                | -1.50192            |
| 1795 | 218630  | Ung2          | cyclin O                                                                              | 0               | 3               | 2                | -1.50179            |
| 1796 | 15495   | Hsd3b4        | hydroxy-delta-5-steroid dehydrogenase, 3 beta- and steroid delta-isomerase 4          | 0               | 4               | 1                | -1.50143            |
| 1797 | 80905   | Polh          | polymerase (DNA directed), eta (RAD 30 related)                                       | 0               | 3               | 2                | -1.50143            |
| 1798 | 76784   | Mtif2         | mitochondrial translational initiation factor 2                                       | 0               | 3               | 2                | -1.5012             |
| 1799 | 214230  | Pak6          | p21 protein (Cdc42/Rac)-activated kinase 6                                            | 0               | 3               | 2                | -1.50099            |
| 1800 | 242711  | LOC242711     | predicted gene 13011                                                                  | 0               | 3               | 2                | -1.50063            |
| 1801 | 74477   | 4933427D14Rik | RIKEN cDNA 4933427D14 gene                                                            | 0               | 3               | 1                | -1.50057            |
| 1802 | 232717  | BC048599      | protease, serine 58                                                                   | 0               | 2               | 3                | -3.86343            |
| 1803 | 241636  | Tgm6          | transglutaminase 6                                                                    | 0               | 2               | 3                | -3.82875            |
| 1804 | 75345   | Slamf7        | SLAM family member 7                                                                  | 0               | 2               | 3                | -3.82336            |
| 1805 | 73547   | 1700094E07Rik | dual specificity phosphatase 21                                                       | 0               | 2               | 3                | -3.59464            |
| 1806 | 100727  | Ugt2b34       | UDP glucuronosyltransferase 2 family, polypeptide B34                                 | 0               | 2               | 3                | -3.55165            |
| 1807 | 56224   | Tspan5        | tetraspanin 5                                                                         | 0               | 2               | 3                | -3.4842             |
| 1808 | 19335   | Rab23         | RAB23, member RAS oncogene family                                                     | 0               | 2               | 3                | -3.34766            |
| 1809 | 66880   | Rsrc1         | arginine/serine-rich coiled-coil 1                                                    | 0               | 2               | 3                | -3.28096            |

Candidates for positive regulators of normal growth (Fisher's)

| Rank | entrez# | Gene Symbol   | Gene name                                                                       | enriched shRNAs | depleted shRNAs | no change shRNAs | average Fold Change |
|------|---------|---------------|---------------------------------------------------------------------------------|-----------------|-----------------|------------------|---------------------|
| 1810 | 50529   | Mrps7         | mitochondrial ribosomal protein S7                                              | 0               | 2               | 3                | -3.20724            |
| 1811 | 258946  | Olfir348      | olfactory receptor 348                                                          | 0               | 2               | 3                | -3.20691            |
| 1812 | 19113   | Prp1e         | prolactin family 7, subfamily a, member 1                                       | 0               | 2               | 2                | -3.14179            |
| 1813 | 226043  | Cbwd1         | COBW domain containing 1                                                        | 0               | 2               | 3                | -3.09471            |
| 1814 | 70546   | Zdhhc2        | zinc finger, DHHC domain containing 2                                           | 0               | 2               | 3                | -3.08453            |
| 1815 | 15492   | Hsd3b1        | hydroxy-delta-5-steroid dehydrogenase, 3 beta- and steroid delta-isomerase 1    | 0               | 2               | 3                | -3.0783             |
| 1816 | 319740  | Zfyve27       | zinc finger, FYVE domain containing 27                                          | 0               | 2               | 2                | -3.05664            |
| 1817 | 85305   | Kars          | lysyl-tRNA synthetase                                                           | 0               | 2               | 3                | -3.05455            |
| 1818 | 56314   | Zfp113        | zinc finger protein 113                                                         | 0               | 2               | 3                | -3.04627            |
| 1819 | 94187   | Zfp423        | zinc finger protein 423                                                         | 0               | 2               | 3                | -3.03109            |
| 1820 | 209824  | V1rd15        | vomer nasal 1 receptor 183                                                      | 0               | 2               | 3                | -3.02531            |
| 1821 | 258654  | Olfir1135     | olfactory receptor 1135                                                         | 0               | 2               | 2                | -3.02066            |
| 1822 | 66298   | 2010016B13Rik | defensin, alpha, 21                                                             | 0               | 2               | 3                | -3.01744            |
| 1823 | 20500   | Slc13a2       | solute carrier family 13 (sodium-dependent dicarboxylate transporter), member 2 | 0               | 2               | 3                | -3.01576            |
| 1824 | 16551   | Kif11         | kinesin family member 11                                                        | 0               | 2               | 3                | -2.99227            |
| 1825 | 108907  | Nusap1        | nucleolar and spindle associated protein 1                                      | 0               | 2               | 2                | -2.98891            |
| 1826 | 64658   | Mrps25        | mitochondrial ribosomal protein S25                                             | 0               | 2               | 3                | -2.97908            |
| 1827 | 107702  | Rnh1          | ribonuclease/angiogenin inhibitor 1                                             | 0               | 2               | 2                | -2.95873            |
| 1828 | 241727  | Snph          | syntaphilin                                                                     | 0               | 2               | 3                | -2.95662            |
| 1829 | 21402   | Skp1a         | S-phase kinase-associated protein 1A                                            | 0               | 2               | 3                | -2.95501            |
| 1830 | 15278   | Tfb2m         | transcription factor B2, mitochondrial                                          | 0               | 2               | 3                | -2.95034            |
| 1831 | 14625   | Gykl1         | glycerol kinase-like 1                                                          | 0               | 2               | 3                | -2.94475            |
| 1832 | 170786  | Cd209a        | CD209a antigen                                                                  | 0               | 2               | 3                | -2.93982            |
| 1833 | 216445  | Arhgap9       | Rho GTPase activating protein 9                                                 | 0               | 2               | 3                | -2.93643            |
| 1834 | 66943   | Pqlc1         | PQ loop repeat containing 1                                                     | 0               | 2               | 3                | -2.91477            |
| 1835 | 19114   | Prp1f         | prolactin family 7, subfamily a, member 2                                       | 0               | 2               | 3                | -2.90076            |
| 1836 | 57316   | C1d           | C1D nuclear receptor co-repressor                                               | 0               | 2               | 3                | -2.88865            |
| 1837 | 321020  | Fpr-rs6       | formyl peptide receptor, related sequence 6                                     | 0               | 2               | 3                | -2.8753             |
| 1838 | 216618  | Ccdc104       | coiled-coil domain containing 104                                               | 0               | 2               | 2                | -2.87334            |
| 1839 | 66471   | Anp32e        | acidic (leucine-rich) nuclear phosphoprotein 32 family, member E                | 0               | 2               | 3                | -2.86886            |
| 1840 | 14810   | Grin1         | glutamate receptor, ionotropic, NMDA1 (zeta 1)                                  | 0               | 2               | 3                | -2.86533            |
| 1841 | 58193   | Extl2         | exostosin (multiple)-like 2                                                     | 0               | 2               | 3                | -2.82381            |
| 1842 | 71791   | Cpa4          | carboxypeptidase A4                                                             | 0               | 2               | 3                | -2.8107             |
| 1843 | 331188  | BC024063      | zinc finger protein 781                                                         | 0               | 2               | 3                | -2.79716            |
| 1844 | 75677   | Cldn22        | claudin 22                                                                      | 0               | 2               | 3                | -2.79527            |
| 1845 | 18245   | Oaz1          | ornithine decarboxylase antizyme 1                                              | 0               | 2               | 2                | -2.79338            |
| 1846 | 383073  | UNK           | NA                                                                              | 0               | 2               | 3                | -2.79167            |

Candidates for positive regulators of normal growth (Fisher's)

| Rank | entrez# | Gene Symbol   | Gene name                                                                             | enriched shRNAs | depleted shRNAs | no change shRNAs | average Fold Change |
|------|---------|---------------|---------------------------------------------------------------------------------------|-----------------|-----------------|------------------|---------------------|
| 1847 | 17164   | Mapkapk2      | MAP kinase-activated protein kinase 2                                                 | 0               | 2               | 3                | -2.79051            |
| 1848 | 16870   | Lhx2          | LIM homeobox protein 2                                                                | 0               | 2               | 3                | -2.78464            |
| 1849 | 103988  | Gck           | glucokinase                                                                           | 0               | 2               | 3                | -2.78102            |
| 1850 | 52009   | D17Ert441e    | hematological and neurological expressed 1-like                                       | 0               | 2               | 3                | -2.77799            |
| 1851 | 14313   | Fst           | follicle-stimulating hormone receptor                                                 | 0               | 2               | 3                | -2.77597            |
| 1852 | 72486   | 2610206B13Rik | ring finger protein 219                                                               | 0               | 2               | 3                | -2.77452            |
| 1853 | 15043   | H2-T3         | histocompatibility 2, T region locus 3                                                | 0               | 2               | 3                | -2.77197            |
| 1854 | 207227  | Stxbp5l       | syntrophin binding protein 5-like                                                     | 0               | 2               | 3                | -2.76255            |
| 1855 | 244179  | 4922504M18Rik | ubiquitin-like                                                                        | 0               | 2               | 3                | -2.76175            |
| 1856 | 238599  | Gm269         | NA                                                                                    | 0               | 2               | 3                | -2.75177            |
| 1857 | 72654   | Ccdc12        | coiled-coil domain containing 12                                                      | 0               | 2               | 3                | -2.75154            |
| 1858 | 226049  | Dmrt2         | doublesex and mab-3 related transcription factor 2                                    | 0               | 2               | 3                | -2.74901            |
| 1859 | 237847  | Rtn4r1l       | reticulon 4 receptor-like 1                                                           | 0               | 2               | 3                | -2.74846            |
| 1860 | 13871   | Ercc2         | excision repair cross-complementing rodent repair deficiency, complementation group 2 | 0               | 2               | 3                | -2.74839            |
| 1861 | 17920   | Myo6          | myosin VI                                                                             | 0               | 2               | 3                | -2.74388            |
| 1862 | 19271   | Ptpn11        | protein tyrosine phosphatase, receptor type, J                                        | 0               | 2               | 3                | -2.74175            |
| 1863 | 27411   | Slc14a2       | solute carrier family 14 (urea transporter), member 2                                 | 0               | 2               | 3                | -2.7339             |
| 1864 | 105355  | Slc17a3       | solute carrier family 17 (sodium phosphate), member 3                                 | 0               | 2               | 3                | -2.72188            |
| 1865 | 15519   | Hsp90aa1      | heat shock protein 90, alpha (cytosolic), class A member 1                            | 0               | 2               | 3                | -2.71712            |
| 1866 | 78977   | Popdc3        | popliteal artery domain containing 3                                                  | 0               | 2               | 3                | -2.71416            |
| 1867 | 74996   | Usp47         | ubiquitin specific peptidase 47                                                       | 0               | 2               | 3                | -2.71274            |
| 1868 | 14915   | Guca2a        | guanylate cyclase activator 2a (guanylin)                                             | 0               | 2               | 3                | -2.70569            |
| 1869 | 14805   | Grik1         | glutamate receptor, ionotropic, kainate 1                                             | 0               | 2               | 3                | -2.7051             |
| 1870 | 230598  | Nrd1          | nardilysin, N-arginine dibasic convertase, NRD convertase 1                           | 0               | 2               | 3                | -2.7026             |
| 1871 | 14675   | Gna14         | guanine nucleotide binding protein, alpha 14                                          | 0               | 2               | 3                | -2.70119            |
| 1872 | 432825  | LOC432825     | predicted gene 5458                                                                   | 0               | 2               | 3                | -2.69808            |
| 1873 | 436244  | UNK           | NA                                                                                    | 0               | 2               | 3                | -2.69314            |
| 1874 | 99470   | Magi3         | membrane associated guanylate kinase, WW and PDZ domain containing 3                  | 0               | 2               | 3                | -2.6916             |
| 1875 | 242126  | Slc22a15      | solute carrier family 22 (organic anion/cation transporter), member 15                | 0               | 2               | 3                | -2.68483            |
| 1876 | 232791  | Cnot3         | CCR4-NOT transcription complex, subunit 3                                             | 0               | 2               | 3                | -2.68393            |
| 1877 | 18508   | Pax6          | paired box gene 6                                                                     | 0               | 2               | 3                | -2.67987            |
| 1878 | 83561   | Tdrd1         | tudor domain containing 1                                                             | 0               | 2               | 2                | -2.67342            |
| 1879 | 12958   | Cryba2        | crystallin, beta A2                                                                   | 0               | 2               | 3                | -2.655              |
| 1880 | 353170  | 4932441K18Rik | taxilin gamma                                                                         | 0               | 2               | 3                | -2.64958            |
| 1881 | 11451   | Acrv1         | acrosomal vesicle protein 1                                                           | 0               | 2               | 2                | -2.64752            |
| 1882 | 236574  | Gm1847        | sperm motility kinase 2B                                                              | 0               | 2               | 3                | -2.64098            |
| 1883 | 78783   | Brpf1         | bromodomain and PHD finger containing, 1                                              | 0               | 2               | 2                | -2.63932            |

Candidates for positive regulators of normal growth (Fisher's)

| Rank | entrez# | Gene Symbol   | Gene name                                                         | enriched shRNAs | depleted shRNAs | no change shRNAs | average Fold Change |
|------|---------|---------------|-------------------------------------------------------------------|-----------------|-----------------|------------------|---------------------|
| 1884 | 23859   | Dlgh2         | discs, large homolog 2 (Drosophila)                               | 0               | 2               | 3                | -2.6369             |
| 1885 | 17149   | Magoh         | mago-nashi homolog, proliferation-associated (Drosophila)         | 0               | 2               | 3                | -2.63581            |
| 1886 | 14077   | Fabp3         | fatty acid binding protein 3, muscle and heart                    | 0               | 2               | 3                | -2.63203            |
| 1887 | 272680  | UNK           | NA                                                                | 0               | 2               | 3                | -2.63105            |
| 1888 | 114713  | Rasa2         | RAS p21 protein activator 2                                       | 0               | 2               | 3                | -2.63082            |
| 1889 | 233537  | Gdpd4         | glycerophosphodiester phosphodiesterase domain containing 4       | 0               | 2               | 3                | -2.63049            |
| 1890 | 258348  | Olf1133       | olfactory receptor 1133                                           | 0               | 2               | 3                | -2.63048            |
| 1891 | 19170   | Psbm1         | proteasome (prosome, macropain) subunit, beta type 1              | 0               | 2               | 3                | -2.62613            |
| 1892 | 384890  | UNK           | NA                                                                | 0               | 2               | 3                | -2.62594            |
| 1893 | 79555   | BC005537      | cDNA sequence BC005537                                            | 0               | 2               | 3                | -2.62541            |
| 1894 | 329738  | 4921525H12Rik | AKNA domain containing 1                                          | 0               | 2               | 3                | -2.62541            |
| 1895 | 74616   | Scrn3         | secernin 3                                                        | 0               | 2               | 3                | -2.61872            |
| 1896 | 103098  | Slc6a15       | solute carrier family 6 (neurotransmitter transporter), member 15 | 0               | 2               | 3                | -2.61853            |
| 1897 | 56811   | Dkk2          | dickkopf homolog 2 (Xenopus laevis)                               | 0               | 2               | 3                | -2.61406            |
| 1898 | 12331   | Cap1          | CAP, adenylate cyclase-associated protein 1 (yeast)               | 0               | 2               | 3                | -2.61394            |
| 1899 | 113852  | V1rb1         | vomer nasal 1 receptor 50                                         | 0               | 2               | 3                | -2.61316            |
| 1900 | 72124   | Seh1l         | SEH1-like (S. cerevisiae)                                         | 0               | 2               | 3                | -2.60744            |
| 1901 | 12476   | Cd151         | CD151 antigen                                                     | 0               | 2               | 3                | -2.58461            |
| 1902 | 11650   | Akp5          | alkaline phosphatase, placental-like 2                            | 0               | 2               | 3                | -2.58456            |
| 1903 | 12045   | Bcl2a1b       | B cell leukemia/lymphoma 2 related protein A1b                    | 0               | 2               | 3                | -2.58432            |
| 1904 | 18597   | Pdha1         | pyruvate dehydrogenase E1 alpha 1                                 | 0               | 2               | 2                | -2.58405            |
| 1905 | 67455   | Klh13         | kelch-like 13 (Drosophila)                                        | 0               | 2               | 3                | -2.56943            |
| 1906 | 258095  | Olf119        | olfactory receptor 119                                            | 0               | 2               | 3                | -2.56935            |
| 1907 | 77980   | Sbf1          | SET binding factor 1                                              | 0               | 2               | 3                | -2.56572            |
| 1908 | 217127  | Myst2         | MYST histone acetyltransferase 2                                  | 0               | 2               | 3                | -2.56495            |
| 1909 | 80906   | Kcnp2         | Kv channel-interacting protein 2                                  | 0               | 2               | 3                | -2.56335            |
| 1910 | 18050   | Klk1b3        | kallikrein 1-related peptidase b3                                 | 0               | 2               | 3                | -2.56277            |
| 1911 | 56771   | Trfp          | mediator complex subunit 20                                       | 0               | 2               | 3                | -2.5624             |
| 1912 | 114142  | Foxp2         | forkhead box P2                                                   | 0               | 2               | 3                | -2.55862            |
| 1913 | 67775   | Rtp4          | receptor transporter protein 4                                    | 0               | 2               | 3                | -2.55699            |
| 1914 | 12832   | Col5a2        | collagen, type V, alpha 2                                         | 0               | 2               | 3                | -2.55455            |
| 1915 | 22702   | Zfp42         | zinc finger protein 42                                            | 0               | 2               | 3                | -2.55192            |
| 1916 | 209815  | Oat1          | TBC1 domain family, member 25                                     | 0               | 2               | 3                | -2.54844            |
| 1917 | 56447   | Copz1         | coatamer protein complex, subunit zeta 1                          | 0               | 2               | 3                | -2.54408            |
| 1918 | 214238  | UNK           | NA                                                                | 0               | 2               | 3                | -2.54083            |
| 1919 | 75820   | 4930511H01Rik | WD repeat domain 64                                               | 0               | 2               | 3                | -2.53974            |
| 1920 | 70673   | Prdm16        | PR domain containing 16                                           | 0               | 2               | 3                | -2.53473            |

Candidates for positive regulators of normal growth (Fisher's)

| Rank | entrez# | Gene Symbol   | Gene name                                                              | enriched shRNAs | depleted shRNAs | no change shRNAs | average Fold Change |
|------|---------|---------------|------------------------------------------------------------------------|-----------------|-----------------|------------------|---------------------|
| 1921 | 66131   | Tipin         | timeless interacting protein                                           | 0               | 2               | 3                | -2.53349            |
| 1922 | 244199  | Ovch2         | ovochymase 2                                                           | 0               | 2               | 3                | -2.53307            |
| 1923 | 18191   | Nrxn3         | neurexin III                                                           | 0               | 2               | 3                | -2.53138            |
| 1924 | 68267   | Slc25a22      | solute carrier family 25 (mitochondrial carrier, glutamate), member 22 | 0               | 2               | 3                | -2.53113            |
| 1925 | 29857   | Mapk12        | mitogen-activated protein kinase 12                                    | 0               | 2               | 3                | -2.53108            |
| 1926 | 22632   | Yy1           | YY1 transcription factor                                               | 0               | 2               | 3                | -2.5282             |
| 1927 | 74204   | Xpo6          | exportin 6                                                             | 0               | 2               | 3                | -2.52731            |
| 1928 | 56716   | Gbl           | MTOR associated protein, LST8 homolog ( <i>S. cerevisiae</i> )         | 0               | 2               | 3                | -2.52729            |
| 1929 | 435233  | UNK           | NA                                                                     | 0               | 2               | 3                | -2.52707            |
| 1930 | 383525  | Gm1295        | NA                                                                     | 0               | 2               | 3                | -2.52292            |
| 1931 | 213827  | Arcn1         | archain 1                                                              | 0               | 2               | 3                | -2.52243            |
| 1932 | 381038  | Parl          | presenilin associated, rhomboid-like                                   | 0               | 2               | 3                | -2.51829            |
| 1933 | 71785   | Pdgfd         | platelet-derived growth factor, D polypeptide                          | 0               | 2               | 3                | -2.51404            |
| 1934 | 67028   | 2610002M06Rik | RIKEN cDNA 2610002M06 gene                                             | 0               | 2               | 3                | -2.51357            |
| 1935 | 140579  | Elmo2         | engulfment and cell motility 2, ced-12 homolog ( <i>C. elegans</i> )   | 0               | 2               | 3                | -2.51261            |
| 1936 | 15207   | Hes3          | hairy and enhancer of split 3 ( <i>Drosophila</i> )                    | 0               | 2               | 3                | -2.51241            |
| 1937 | 228136  | Zdhhc5        | zinc finger, DHHC domain containing 5                                  | 0               | 2               | 3                | -2.51116            |
| 1938 | 170750  | Xpnpep1       | X-prolyl aminopeptidase (aminopeptidase P) 1, soluble                  | 0               | 2               | 3                | -2.50857            |
| 1939 | 329244  | Il19          | interleukin 19                                                         | 0               | 2               | 3                | -2.50816            |
| 1940 | 239857  | Igsf4d        | cell adhesion molecule 2                                               | 0               | 2               | 3                | -2.50662            |
| 1941 | 54447   | Asah2         | N-acylsphingosine amidohydrolase 2                                     | 0               | 2               | 3                | -2.50332            |
| 1942 | 258699  | Olf1446       | olfactory receptor 1446                                                | 0               | 2               | 3                | -2.50065            |
| 1943 | 19024   | Ppfibp2       | PTPRF interacting protein, binding protein 2 (liprin beta 2)           | 0               | 2               | 3                | -2.50034            |
| 1944 | 110446  | Acat1         | acetyl-Coenzyme A acetyltransferase 1                                  | 0               | 2               | 3                | -2.49926            |
| 1945 | 108978  | 4930555G01Rik | RIKEN cDNA 4930555G01 gene                                             | 0               | 2               | 3                | -2.49865            |
| 1946 | 14191   | Fgr           | Gardner-Rasheed feline sarcoma viral (Fgr) oncogene homolog            | 0               | 2               | 3                | -2.4962             |
| 1947 | 268860  | Abat          | 4-aminobutyrate aminotransferase                                       | 0               | 2               | 3                | -2.49543            |
| 1948 | 66556   | Drap1         | Dr1 associated protein 1 (negative cofactor 2 alpha)                   | 0               | 2               | 3                | -2.49101            |
| 1949 | 223809  | Smgc          | submandibular gland protein C                                          | 0               | 2               | 2                | -2.48992            |
| 1950 | 19242   | Ptn           | pleiotrophin                                                           | 0               | 2               | 3                | -2.48712            |
| 1951 | 235028  | Zfp426        | zinc finger protein 426                                                | 0               | 2               | 3                | -2.48652            |
| 1952 | 67429   | Nudcd1        | NudC domain containing 1                                               | 0               | 2               | 2                | -2.48627            |
| 1953 | 18810   | Plec1         | plectin                                                                | 0               | 2               | 3                | -2.48371            |
| 1954 | 93790   | Nipa2         | non imprinted in Prader-Willi/Angelman syndrome 2 homolog (human)      | 0               | 2               | 3                | -2.48115            |
| 1955 | 57781   | Cd200r1       | CD200 receptor 1                                                       | 0               | 2               | 3                | -2.4809             |
| 1956 | 381530  | MGC107671     | major urinary protein 20                                               | 0               | 2               | 3                | -2.47674            |
| 1957 | 67427   | Rps20         | ribosomal protein S20                                                  | 0               | 2               | 3                | -2.47402            |



Candidates for positive regulators of normal growth (Fisher's)

| Rank | entrez# | Gene Symbol   | Gene name                                                           | enriched shRNAs | depleted shRNAs | no change shRNAs | average Fold Change |
|------|---------|---------------|---------------------------------------------------------------------|-----------------|-----------------|------------------|---------------------|
| 1958 | 13018   | Ctcf          | CCCTC-binding factor                                                | 0               | 2               | 3                | -2.47295            |
| 1959 | 229877  | Rap1gds1      | RAP1, GTP-GDP dissociation stimulator 1                             | 0               | 2               | 3                | -2.47259            |
| 1960 | 56868   | Psg23         | pregnancy-specific glycoprotein 23                                  | 0               | 2               | 3                | -2.47112            |
| 1961 | 13525   | Adam26a       | a disintegrin and metallopeptidase domain 26A (testase 3)           | 0               | 2               | 3                | -2.4705             |
| 1962 | 67465   | Sf3a1         | splicing factor 3a, subunit 1                                       | 0               | 2               | 3                | -2.46804            |
| 1963 | 68801   | Elov15        | ELOVL family member 5, elongation of long chain fatty acids (yeast) | 0               | 2               | 3                | -2.46781            |
| 1964 | 114249  | Npnt          | nephronectin                                                        | 0               | 2               | 3                | -2.4675             |
| 1965 | 381599  | UNK           | NA                                                                  | 0               | 2               | 3                | -2.46749            |
| 1966 | 81701   | Egfl8         | EGF-like domain 8                                                   | 0               | 2               | 2                | -2.46669            |
| 1967 | 93725   | Ear10         | eosinophil-associated, ribonuclease A family, member 10             | 0               | 2               | 3                | -2.46377            |
| 1968 | 19715   | Rex2          | NA                                                                  | 0               | 2               | 3                | -2.46158            |
| 1969 | 18760   | Prkcm         | protein kinase D1                                                   | 0               | 2               | 3                | -2.45965            |
| 1970 | 170459  | Stard4        | STAR-related lipid transfer (START) domain containing 4             | 0               | 2               | 3                | -2.45728            |
| 1971 | 11793   | Atg5          | autophagy-related 5 (yeast)                                         | 0               | 2               | 3                | -2.45652            |
| 1972 | 73024   | 2900064A13Rik | RIKEN cDNA 2900064A13 gene                                          | 0               | 2               | 2                | -2.4541             |
| 1973 | 57436   | Gabarap1      | gamma-aminobutyric acid (GABA) A receptor-associated protein-like 1 | 0               | 2               | 3                | -2.45271            |
| 1974 | 382006  | LOC382006     | NA                                                                  | 0               | 2               | 3                | -2.4452             |
| 1975 | 216456  | Gls2          | glutaminase 2 (liver, mitochondrial)                                | 0               | 2               | 2                | -2.44481            |
| 1976 | 13853   | Epm2a         | epilepsy, progressive myoclonic epilepsy, type 2 gene alpha         | 0               | 2               | 3                | -2.44152            |
| 1977 | 192113  | Atp12a        | ATPase, H+/K+ transporting, nongastric, alpha polypeptide           | 0               | 2               | 3                | -2.4413             |
| 1978 | 71375   | Ches1         | forkhead box N3                                                     | 0               | 2               | 3                | -2.44057            |
| 1979 | 20290   | Ccl1          | chemokine (C-C motif) ligand 1                                      | 0               | 2               | 3                | -2.43565            |
| 1980 | 50773   | Nt5c          | 5',3'-nucleotidase, cytosolic                                       | 0               | 2               | 2                | -2.43132            |
| 1981 | 271639  | Sacy          | adenylate cyclase 10                                                | 0               | 2               | 3                | -2.43121            |
| 1982 | 21420   | Tcfap2c       | transcription factor AP-2, gamma                                    | 0               | 2               | 3                | -2.43082            |
| 1983 | 73866   | 4930432H15Rik | family with sequence similarity 122, member C                       | 0               | 2               | 2                | -2.42933            |
| 1984 | 258281  | Olf780        | olfactory receptor 780                                              | 0               | 2               | 2                | -2.42668            |
| 1985 | 16469   | Jrk           | jerky                                                               | 0               | 2               | 2                | -2.42505            |
| 1986 | 14776   | Gpx2          | glutathione peroxidase 2                                            | 0               | 2               | 3                | -2.42449            |
| 1987 | 78789   | Vsig1         | V-set and immunoglobulin domain containing 1                        | 0               | 2               | 3                | -2.42439            |
| 1988 | 76282   | Gpt1          | glutamic pyruvic transaminase, soluble                              | 0               | 2               | 3                | -2.42403            |
| 1989 | 76877   | Rab36         | RAB36, member RAS oncogene family                                   | 0               | 2               | 3                | -2.423              |
| 1990 | 14712   | Gnpat         | glyceronephosphate O-acyltransferase                                | 0               | 2               | 2                | -2.42186            |
| 1991 | 26374   | Rfwd2         | ring finger and WD repeat domain 2                                  | 0               | 2               | 3                | -2.42178            |
| 1992 | 66411   | Ckap1         | tubulin folding cofactor B                                          | 0               | 2               | 3                | -2.42102            |
| 1993 | 258755  | Olf762        | olfactory receptor 672                                              | 0               | 2               | 3                | -2.42085            |
| 1994 | 223631  | BC025446      | cDNA sequence BC025446                                              | 0               | 2               | 3                | -2.41828            |

Candidates for positive regulators of normal growth (Fisher's)

| Rank | entrez# | Gene Symbol   | Gene name                                                     | enriched shRNAs | depleted shRNAs | no change shRNAs | average Fold Change |
|------|---------|---------------|---------------------------------------------------------------|-----------------|-----------------|------------------|---------------------|
| 1995 | 12615   | Cenpa         | centromere protein A                                          | 0               | 2               | 3                | -2.41777            |
| 1996 | 208084  | Al449441      | PIF1 5'-to-3' DNA helicase homolog (S. cerevisiae)            | 0               | 2               | 3                | -2.41689            |
| 1997 | 433501  | LOC433501     | NA                                                            | 0               | 2               | 3                | -2.41578            |
| 1998 | 18607   | Pdpk1         | 3-phosphoinositide dependent protein kinase 1                 | 0               | 2               | 3                | -2.41538            |
| 1999 | 53857   | Tuba8         | tubulin, alpha 8                                              | 0               | 2               | 3                | -2.41509            |
| 2000 | 27756   | Lsm2          | LSM2 homolog, U6 small nuclear RNA associated (S. cerevisiae) | 0               | 2               | 3                | -2.41503            |
| 2001 | 22301   | V2r10         | vomer nasal 2, receptor 89                                    | 0               | 2               | 3                | -2.415              |
| 2002 | 20911   | Stxbp2        | syntaxin binding protein 2                                    | 0               | 2               | 3                | -2.41407            |
| 2003 | 74121   | Acox1         | acyl-Coenzyme A oxidase-like                                  | 0               | 2               | 3                | -2.41345            |
| 2004 | 16842   | Lef1          | lymphoid enhancer binding factor 1                            | 0               | 2               | 3                | -2.41076            |
| 2005 | 11556   | Adrb3         | adrenergic receptor, beta 3                                   | 0               | 2               | 3                | -2.40989            |
| 2006 | 14538   | Gcnt2         | glucosaminyl (N-acetyl) transferase 2, I-branching enzyme     | 0               | 2               | 3                | -2.40903            |
| 2007 | 93897   | Fzd10         | frizzled homolog 10 (Drosophila)                              | 0               | 2               | 2                | -2.40798            |
| 2008 | 18343   | Olf44         | olfactory receptor 44                                         | 0               | 2               | 2                | -2.40777            |
| 2009 | 21975   | Top3a         | topoisomerase (DNA) III alpha                                 | 0               | 2               | 3                | -2.40723            |
| 2010 | 18014   | Neurog1       | neurogenin 1                                                  | 0               | 2               | 2                | -2.4024             |
| 2011 | 53311   | Mybph         | myosin binding protein H                                      | 0               | 2               | 2                | -2.4016             |
| 2012 | 16198   | Il9           | interleukin 9                                                 | 0               | 2               | 3                | -2.40114            |
| 2013 | 382206  | Ssx9          | synovial sarcoma, X breakpoint 9                              | 0               | 2               | 2                | -2.40075            |
| 2014 | 69511   | Klk12         | kallikrein related-peptidase 12                               | 0               | 2               | 3                | -2.39939            |
| 2015 | 16675   | Krt1-c29      | keratin 27                                                    | 0               | 2               | 3                | -2.39845            |
| 2016 | 386422  | UNK           | NA                                                            | 0               | 2               | 3                | -2.39831            |
| 2017 | 17884   | Myh4          | myosin, heavy polypeptide 4, skeletal muscle                  | 0               | 2               | 3                | -2.39819            |
| 2018 | 12965   | Crygb         | crystallin, gamma B                                           | 0               | 2               | 3                | -2.39764            |
| 2019 | 11501   | Adam8         | a disintegrin and metallopeptidase domain 8                   | 0               | 2               | 3                | -2.39655            |
| 2020 | 83429   | Ctns          | cystinosis, nephropathic                                      | 0               | 2               | 3                | -2.39635            |
| 2021 | 14400   | Gabbr1        | gamma-aminobutyric acid (GABA) A receptor, subunit beta 1     | 0               | 2               | 3                | -2.39483            |
| 2022 | 72780   | Rspo3         | R-spondin 3 homolog (Xenopus laevis)                          | 0               | 2               | 3                | -2.39015            |
| 2023 | 433073  | LOC433073     | actin related protein 2/3 complex, subunit 2 pseudogene       | 0               | 2               | 3                | -2.39013            |
| 2024 | 14080   | Fabp1         | fatty acid binding protein 1, liver                           | 0               | 2               | 3                | -2.38966            |
| 2025 | 236790  | 6330505F04Rik | DEAD/H (Asp-Glu-Ala-Asp/His) box polypeptide 26B              | 0               | 2               | 3                | -2.38906            |
| 2026 | 17138   | Magea2        | melanoma antigen, family A, 2                                 | 0               | 2               | 3                | -2.38472            |
| 2027 | 109660  | Ctrl          | chymotrypsin-like                                             | 0               | 2               | 3                | -2.38241            |
| 2028 | 16549   | Khsrp         | KH-type splicing regulatory protein                           | 0               | 2               | 3                | -2.37718            |
| 2029 | 54390   | Sit1          | suppression inducing transmembrane adaptor 1                  | 0               | 2               | 3                | -2.37685            |
| 2030 | 56298   | Arl6ip2       | atlastin GTPase 2                                             | 0               | 2               | 2                | -2.37389            |
| 2031 | 66827   | Ttc1          | tetratricopeptide repeat domain 1                             | 0               | 2               | 3                | -2.37312            |

Candidates for positive regulators of normal growth (Fisher's)

| Rank | entrez# | Gene Symbol   | Gene name                                          | enriched shRNAs | depleted shRNAs | no change shRNAs | average Fold Change |
|------|---------|---------------|----------------------------------------------------|-----------------|-----------------|------------------|---------------------|
| 2032 | 171207  | Arhgap4       | Rho GTPase activating protein 4                    | 0               | 2               | 3                | -2.37282            |
| 2033 | 66736   | 4921531G14Rik | tetratricopeptide repeat domain 35                 | 0               | 2               | 3                | -2.37277            |
| 2034 | 329919  | A430070M19    | selection and upkeep of intraepithelial T cells 2  | 0               | 2               | 2                | -2.37139            |
| 2035 | 100604  | Lrrc8c        | leucine rich repeat containing 8 family, member C  | 0               | 2               | 2                | -2.37007            |
| 2036 | 18749   | Prkacb        | protein kinase, cAMP dependent, catalytic, beta    | 0               | 2               | 3                | -2.36768            |
| 2037 | 117229  | Stk33         | serine/threonine kinase 33                         | 0               | 2               | 3                | -2.36383            |
| 2038 | 72181   | Nsun4         | NOL1/NOP2/Sun domain family, member 4              | 0               | 2               | 3                | -2.36172            |
| 2039 | 14811   | Grin2a        | glutamate receptor, ionotropic, NMDA2A (epsilon 1) | 0               | 2               | 3                | -2.36033            |
| 2040 | 246196  | Zfp277        | zinc finger protein 277                            | 0               | 2               | 3                | -2.3561             |
| 2041 | 224705  | Vps52         | vacuolar protein sorting 52 (yeast)                | 0               | 2               | 3                | -2.35534            |
| 2042 | 235324  | UNK           | NA                                                 | 0               | 2               | 3                | -2.35495            |
| 2043 | 258704  | Olf411        | olfactory receptor 411                             | 0               | 2               | 3                | -2.35355            |
| 2044 | 216443  | Mars          | methionine-tRNA synthetase                         | 0               | 2               | 3                | -2.3529             |
| 2045 | 58234   | Shank3        | SH3/ankyrin domain gene 3                          | 0               | 2               | 3                | -2.35232            |
| 2046 | 104111  | Adcy3         | adenylate cyclase 3                                | 0               | 2               | 3                | -2.35218            |
| 2047 | 353325  | Tas2r115      | taste receptor, type 2, member 115                 | 0               | 2               | 3                | -2.35212            |
| 2048 | 21953   | Tnni2         | troponin I, skeletal, fast 2                       | 0               | 2               | 2                | -2.35203            |
| 2049 | 68420   | Ankrd13a      | ankyrin repeat domain 13a                          | 0               | 2               | 2                | -2.3515             |
| 2050 | 433180  | LOC433180     | serine peptidase inhibitor, Kazal type 6           | 0               | 2               | 3                | -2.34999            |
| 2051 | 12649   | Chek1         | checkpoint kinase 1                                | 0               | 2               | 3                | -2.34758            |
| 2052 | 17144   | Magea8        | melanoma antigen, family A, 8                      | 0               | 2               | 3                | -2.34748            |
| 2053 | 30956   | Aass          | aminoadipate-semialdehyde synthase                 | 0               | 2               | 3                | -2.34499            |
| 2054 | 67154   | Mtdh          | metadherin                                         | 0               | 2               | 3                | -2.34464            |
| 2055 | 13489   | Drd2          | dopamine receptor D2                               | 0               | 2               | 3                | -2.34426            |
| 2056 | 17901   | Myl1          | myosin, light polypeptide 1                        | 0               | 2               | 3                | -2.34153            |
| 2057 | 16923   | Lnk           | SH2B adaptor protein 3                             | 0               | 2               | 3                | -2.33855            |
| 2058 | 67276   | Thex1         | exoribonuclease 1                                  | 0               | 2               | 3                | -2.33764            |
| 2059 | 67719   | 2310057J18Rik | RIKEN cDNA 2310057J18 gene                         | 0               | 2               | 2                | -2.33676            |
| 2060 | 66586   | Crls1         | cardiolipin synthase 1                             | 0               | 2               | 3                | -2.3367             |
| 2061 | 216395  | Tmem5         | transmembrane protein 5                            | 0               | 2               | 3                | -2.33627            |
| 2062 | 20973   | Syngn2        | synaptogyrin 2                                     | 0               | 2               | 3                | -2.3296             |
| 2063 | 66302   | 2410005O16Rik | family with sequence similarity 82, member B       | 0               | 2               | 2                | -2.32892            |
| 2064 | 214779  | 9630041N07Rik | zinc finger protein 879                            | 0               | 2               | 3                | -2.32727            |
| 2065 | 17281   | Rpl37         | ribosomal protein L37                              | 0               | 2               | 3                | -2.32439            |
| 2066 | 64803   | Grid1         | glutamate receptor, ionotropic, delta 1            | 0               | 2               | 3                | -2.32428            |
| 2067 | 66889   | Rnf128        | ring finger protein 128                            | 0               | 2               | 3                | -2.32395            |
| 2068 | 69032   | Lyzi4         | lysozyme-like 4                                    | 0               | 2               | 3                | -2.32253            |

Candidates for positive regulators of normal growth (Fisher's)

| Rank | entrez# | Gene Symbol   | Gene name                                                                         | enriched shRNAs | depleted shRNAs | no change shRNAs | average Fold Change |
|------|---------|---------------|-----------------------------------------------------------------------------------|-----------------|-----------------|------------------|---------------------|
| 2069 | 101533  | Klk9          | kallikrein related-peptidase 9                                                    | 0               | 2               | 2                | -2.31849            |
| 2070 | 224805  | Aarsl         | alanyl-tRNA synthetase 2, mitochondrial (putative)                                | 0               | 2               | 3                | -2.31686            |
| 2071 | 66601   | Tmigd         | transmembrane and immunoglobulin domain containing 1                              | 0               | 2               | 3                | -2.31633            |
| 2072 | 230991  | B930041F14Rik | RIKEN cDNA B930041F14 gene                                                        | 0               | 2               | 3                | -2.31228            |
| 2073 | 13839   | Epha5         | Eph receptor A5                                                                   | 0               | 2               | 3                | -2.31061            |
| 2074 | 52163   | Camk1         | calcium/calmodulin-dependent protein kinase I                                     | 0               | 2               | 3                | -2.31007            |
| 2075 | 217431  | Nol10         | nucleolar protein 10                                                              | 0               | 2               | 2                | -2.30815            |
| 2076 | 171283  | Havcr1        | hepatitis A virus cellular receptor 1                                             | 0               | 2               | 3                | -2.30674            |
| 2077 | 72149   | 2610019A05Rik | STE20-related kinase adaptor alpha                                                | 0               | 2               | 3                | -2.30285            |
| 2078 | 229541  | Dennd4b       | DENN/MADD domain containing 4B                                                    | 0               | 2               | 3                | -2.30217            |
| 2079 | 280621  | BC089491      | cDNA sequence BC089491                                                            | 0               | 2               | 2                | -2.30154            |
| 2080 | 433642  | UNK           | NA                                                                                | 0               | 2               | 3                | -2.30123            |
| 2081 | 207958  | Alg11         | asparagine-linked glycosylation 11 homolog (yeast, alpha-1,2-mannosyltransferase) | 0               | 2               | 3                | -2.29927            |
| 2082 | 108014  | Sfrs9         | serine/arginine-rich splicing factor 9                                            | 0               | 2               | 2                | -2.29906            |
| 2083 | 321021  | Fpr-rs7       | formyl peptide receptor, related sequence 7                                       | 0               | 2               | 3                | -2.29836            |
| 2084 | 232044  | UNK           | NA                                                                                | 0               | 2               | 3                | -2.29774            |
| 2085 | 30932   | Zfp330        | zinc finger protein 330                                                           | 0               | 2               | 3                | -2.29738            |
| 2086 | 18399   | Slc22a6       | solute carrier family 22 (organic anion transporter), member 6                    | 0               | 2               | 3                | -2.29626            |
| 2087 | 259108  | Olfir550      | olfactory receptor 550                                                            | 0               | 2               | 3                | -2.29612            |
| 2088 | 93888   | Pcdhb17       | protocadherin beta 17                                                             | 0               | 2               | 3                | -2.29522            |
| 2089 | 69352   | Efcbp1        | N-terminal EF-hand calcium binding protein 1                                      | 0               | 2               | 3                | -2.29485            |
| 2090 | 18947   | Pnliprp2      | pancreatic lipase-related protein 2                                               | 0               | 2               | 3                | -2.29425            |
| 2091 | 75871   | 4930566A11Rik | zinc finger protein 821                                                           | 0               | 2               | 3                | -2.29283            |
| 2092 | 11287   | Pzp           | pregnancy zone protein                                                            | 0               | 2               | 3                | -2.2925             |
| 2093 | 14262   | Fmo3          | flavin containing monooxygenase 3                                                 | 0               | 2               | 3                | -2.29226            |
| 2094 | 13090   | Cyp2b19       | cytochrome P450, family 2, subfamily b, polypeptide 19                            | 0               | 2               | 3                | -2.29222            |
| 2095 | 80903   | Fgf16         | fibroblast growth factor 16                                                       | 0               | 2               | 3                | -2.29018            |
| 2096 | 214597  | Sidt2         | SID1 transmembrane family, member 2                                               | 0               | 2               | 3                | -2.288              |
| 2097 | 258697  | Olfir1444     | olfactory receptor 1444                                                           | 0               | 2               | 3                | -2.2867             |
| 2098 | 72391   | Cdkn3         | cyclin-dependent kinase inhibitor 3                                               | 0               | 2               | 3                | -2.28419            |
| 2099 | 71355   | Col24a1       | collagen, type XXIV, alpha 1                                                      | 0               | 2               | 3                | -2.28058            |
| 2100 | 435777  | UNK           | NA                                                                                | 0               | 2               | 3                | -2.2782             |
| 2101 | 19400   | Rapsn         | receptor-associated protein of the synapse                                        | 0               | 2               | 3                | -2.27528            |
| 2102 | 71804   | 2610016C23Rik | family with sequence similarity 54, member A                                      | 0               | 2               | 3                | -2.27492            |
| 2103 | 69732   | 2410018L13Rik | RIKEN cDNA 2410018L13 gene                                                        | 0               | 2               | 3                | -2.27487            |
| 2104 | 258075  | Olfir832      | olfactory receptor 832                                                            | 0               | 2               | 3                | -2.27402            |
| 2105 | 107513  | Ssr1          | signal sequence receptor, alpha                                                   | 0               | 2               | 3                | -2.27358            |

Candidates for positive regulators of normal growth (Fisher's)

| Rank | entrez# | Gene Symbol   | Gene name                                                                                           | enriched shRNAs | depleted shRNAs | no change shRNAs | average Fold Change |
|------|---------|---------------|-----------------------------------------------------------------------------------------------------|-----------------|-----------------|------------------|---------------------|
| 2106 | 217116  | Spata20       | spermatogenesis associated 20                                                                       | 0               | 2               | 3                | -2.27348            |
| 2107 | 207728  | Pde2a         | phosphodiesterase 2A, cGMP-stimulated                                                               | 0               | 2               | 3                | -2.27248            |
| 2108 | 258711  | Olf432        | olfactory receptor 432                                                                              | 0               | 2               | 3                | -2.27204            |
| 2109 | 67054   | Paics         | phosphoribosylaminoimidazole carboxylase, phosphoribosylaminoribosylaminoimidazole, succinocar      | 0               | 2               | 3                | -2.27191            |
| 2110 | 68231   | 1700113O17Rik | H2A histone family, member B1                                                                       | 0               | 2               | 3                | -2.27114            |
| 2111 | 258630  | Olf1141       | olfactory receptor 1141                                                                             | 0               | 2               | 2                | -2.27076            |
| 2112 | 67065   | Polr3d        | polymerase (RNA) III (DNA directed) polypeptide D                                                   | 0               | 2               | 3                | -2.27005            |
| 2113 | 93700   | Pcdhgb2       | protocadherin gamma subfamily B, 2                                                                  | 0               | 2               | 3                | -2.2683             |
| 2114 | 268391  | A830031A19Rik | RIKEN cDNA A830031A19 gene                                                                          | 0               | 2               | 3                | -2.26748            |
| 2115 | 12371   | Casp9         | caspase 9                                                                                           | 0               | 2               | 3                | -2.2674             |
| 2116 | 67239   | Bxdc1         | ribosome production factor 2 homolog (S. cerevisiae)                                                | 0               | 2               | 2                | -2.26723            |
| 2117 | 13664   | Eif1a         | eukaryotic translation initiation factor 1A                                                         | 0               | 2               | 3                | -2.26676            |
| 2118 | 26560   | Krtap15       | keratin associated protein 15                                                                       | 0               | 2               | 3                | -2.26562            |
| 2119 | 244555  | UNK           | NA                                                                                                  | 0               | 2               | 3                | -2.26466            |
| 2120 | 55934   | Rp9h          | retinitis pigmentosa 9 (human)                                                                      | 0               | 2               | 3                | -2.26305            |
| 2121 | 20307   | Ccl8          | chemokine (C-C motif) ligand 8                                                                      | 0               | 2               | 2                | -2.26113            |
| 2122 | 192161  | Pcdha9        | protocadherin alpha 9                                                                               | 0               | 2               | 3                | -2.2607             |
| 2123 | 270097  | AI427515      | vesicle amine transport protein 1 homolog-like (T. californica)                                     | 0               | 2               | 3                | -2.26034            |
| 2124 | 20739   | Spna1         | spectrin alpha 1                                                                                    | 0               | 2               | 3                | -2.25946            |
| 2125 | 17350   | Mlh1          | mutL homolog 1 (E. coli)                                                                            | 0               | 2               | 3                | -2.25872            |
| 2126 | 12369   | Casp7         | caspase 7                                                                                           | 0               | 2               | 3                | -2.25799            |
| 2127 | 19087   | Prkar2a       | protein kinase, cAMP dependent regulatory, type II alpha                                            | 0               | 2               | 3                | -2.25797            |
| 2128 | 20446   | St6galnac2    | ST6 (alpha-N-acetyl-neuraminy-2,3-beta-galactosyl-1,3)-N-acetylgalactosaminide alpha-2,6-sialyltran | 0               | 2               | 3                | -2.25792            |
| 2129 | 23988   | Pin1          | protein (peptidyl-prolyl cis/trans isomerase) NIMA-interacting 1                                    | 0               | 2               | 3                | -2.25665            |
| 2130 | 269523  | Vcp           | valosin containing protein                                                                          | 0               | 2               | 3                | -2.25412            |
| 2131 | 17256   | Mea1          | male enhanced antigen 1                                                                             | 0               | 2               | 3                | -2.2535             |
| 2132 | 224344  | Rbm11         | RNA binding motif protein 11                                                                        | 0               | 2               | 2                | -2.2531             |
| 2133 | 20315   | Cxcl12        | chemokine (C-X-C motif) ligand 12                                                                   | 0               | 2               | 3                | -2.25236            |
| 2134 | 17169   | Mark3         | MAP/microtubule affinity-regulating kinase 3                                                        | 0               | 2               | 3                | -2.25079            |
| 2135 | 18798   | Plcb4         | phospholipase C, beta 4                                                                             | 0               | 2               | 3                | -2.25026            |
| 2136 | 66716   | 4921510H08Rik | RIKEN cDNA 4921510H08 gene                                                                          | 0               | 2               | 2                | -2.25014            |
| 2137 | 68988   | Prpf31        | PRP31 pre-mRNA processing factor 31 homolog (yeast)                                                 | 0               | 2               | 3                | -2.24749            |
| 2138 | 171256  | V1ri5         | vomer nasal 1 receptor 218                                                                          | 0               | 2               | 3                | -2.24734            |
| 2139 | 12286   | Cacna1a       | calcium channel, voltage-dependent, P/Q type, alpha 1A subunit                                      | 0               | 2               | 3                | -2.24726            |
| 2140 | 80720   | Pbx4          | pre B cell leukemia homeobox 4                                                                      | 0               | 2               | 3                | -2.2469             |
| 2141 | 231986  | AI591476      | JAZF zinc finger 1                                                                                  | 0               | 2               | 3                | -2.24603            |
| 2142 | 69726   | Smyd3         | SET and MYND domain containing 3                                                                    | 0               | 2               | 3                | -2.24468            |

Candidates for positive regulators of normal growth (Fisher's)

| Rank | entrez# | Gene Symbol   | Gene name                                                               | enriched shRNAs | depleted shRNAs | no change shRNAs | average Fold Change |
|------|---------|---------------|-------------------------------------------------------------------------|-----------------|-----------------|------------------|---------------------|
| 2143 | 74409   | 4932701A20Rik | hyaluronoglucosaminidase 6                                              | 0               | 2               | 3                | -2.24351            |
| 2144 | 24117   | Wif1          | Wnt inhibitory factor 1                                                 | 0               | 2               | 3                | -2.24291            |
| 2145 | 18647   | Pftk1         | cyclin-dependent kinase 14                                              | 0               | 2               | 3                | -2.24262            |
| 2146 | 14860   | Gsta4         | glutathione S-transferase, alpha 4                                      | 0               | 2               | 3                | -2.23851            |
| 2147 | 70361   | Lman1         | lectin, mannose-binding, 1                                              | 0               | 2               | 3                | -2.23729            |
| 2148 | 230596  | Prpf38a       | PRP38 pre-mRNA processing factor 38 (yeast) domain containing A         | 0               | 2               | 3                | -2.2372             |
| 2149 | 15953   | Ifi47         | interferon gamma inducible protein 47                                   | 0               | 2               | 3                | -2.23607            |
| 2150 | 407823  | Baz2b         | bromodomain adjacent to zinc finger domain, 2B                          | 0               | 2               | 3                | -2.2353             |
| 2151 | 80914   | Uck2          | uridine-cytidine kinase 2                                               | 0               | 2               | 3                | -2.2349             |
| 2152 | 70363   | 1700010C24Rik | family with sequence similarity 135, member B                           | 0               | 2               | 2                | -2.23441            |
| 2153 | 18515   | Pbx2          | pre B cell leukemia homeobox 2                                          | 0               | 2               | 3                | -2.23317            |
| 2154 | 226849  | Ppp2r5a       | protein phosphatase 2, regulatory subunit B (B56), alpha isoform        | 0               | 2               | 3                | -2.23302            |
| 2155 | 69930   | Zfp715        | zinc finger protein 715                                                 | 0               | 2               | 3                | -2.23295            |
| 2156 | 70797   | Ankib1        | ankyrin repeat and IBR domain containing 1                              | 0               | 2               | 2                | -2.23249            |
| 2157 | 11363   | Acadl         | acyl-Coenzyme A dehydrogenase, long-chain                               | 0               | 2               | 3                | -2.23068            |
| 2158 | 19732   | Rgl2          | ral guanine nucleotide dissociation stimulator-like 2                   | 0               | 2               | 3                | -2.2281             |
| 2159 | 66722   | Spag16        | sperm associated antigen 16                                             | 0               | 2               | 2                | -2.22721            |
| 2160 | 258620  | Olf350        | olfactory receptor 350                                                  | 0               | 2               | 2                | -2.22677            |
| 2161 | 11694   | Alx3          | aristaless-like homeobox 3                                              | 0               | 2               | 3                | -2.22547            |
| 2162 | 66901   | Proz          | protein Z, vitamin K-dependent plasma glycoprotein                      | 0               | 2               | 3                | -2.22231            |
| 2163 | 74153   | Ube1l         | ubiquitin-like modifier activating enzyme 7                             | 0               | 2               | 3                | -2.22204            |
| 2164 | 13972   | Gnb1l         | guanine nucleotide binding protein (G protein), beta polypeptide 1-like | 0               | 2               | 3                | -2.22166            |
| 2165 | 17474   | Clec4d        | C-type lectin domain family 4, member d                                 | 0               | 2               | 3                | -2.22007            |
| 2166 | 15415   | Hoxb7         | homeobox B7                                                             | 0               | 2               | 3                | -2.21891            |
| 2167 | 329260  | BC042698      | DENN/MADD domain containing 1B                                          | 0               | 2               | 3                | -2.21871            |
| 2168 | 219131  | Phf11         | PHD finger protein 11                                                   | 0               | 2               | 3                | -2.21856            |
| 2169 | 74011   | Slc25a27      | solute carrier family 25, member 27                                     | 0               | 2               | 3                | -2.21853            |
| 2170 | 67117   | Dynlt3        | dynein light chain Tctex-type 3                                         | 0               | 2               | 3                | -2.21773            |
| 2171 | 208518  | Cep78         | centrosomal protein 78                                                  | 0               | 2               | 3                | -2.21628            |
| 2172 | 101739  | Psip1         | PC4 and SFRS1 interacting protein 1                                     | 0               | 2               | 3                | -2.21574            |
| 2173 | 67211   | 2810037C14Rik | armadillo repeat containing 10                                          | 0               | 2               | 3                | -2.21552            |
| 2174 | 59042   | Cope          | coatamer protein complex, subunit epsilon                               | 0               | 2               | 3                | -2.2148             |
| 2175 | 73720   | Cst6          | cystatin E/M                                                            | 0               | 2               | 3                | -2.21363            |
| 2176 | 394436  | Ugt1a1        | UDP glucuronosyltransferase 1 family, polypeptide A1                    | 0               | 2               | 3                | -2.21303            |
| 2177 | 234396  | Ankrd41       | ankyrin repeat and LEM domain containing 1                              | 0               | 2               | 2                | -2.21283            |
| 2178 | 76889   | Adck4         | aarF domain containing kinase 4                                         | 0               | 2               | 3                | -2.21173            |
| 2179 | 15382   | Hnrpa1        | heterogeneous nuclear ribonucleoprotein A1                              | 0               | 2               | 3                | -2.21159            |

Candidates for positive regulators of normal growth (Fisher's)

| Rank | entrez# | Gene Symbol   | Gene name                                                          | enriched shRNAs | depleted shRNAs | no change shRNAs | average Fold Change |
|------|---------|---------------|--------------------------------------------------------------------|-----------------|-----------------|------------------|---------------------|
| 2180 | 435230  | UNK           | NA                                                                 | 0               | 2               | 3                | -2.21092            |
| 2181 | 93970   | Klra18        | killer cell lectin-like receptor, subfamily A, member 18           | 0               | 2               | 3                | -2.21016            |
| 2182 | 69962   | 2810422O20Rik | RIKEN cDNA 2810422O20 gene                                         | 0               | 2               | 2                | -2.20854            |
| 2183 | 78330   | 1500032D16Rik | NADH dehydrogenase (ubiquinone) flavoprotein 3                     | 0               | 2               | 3                | -2.20699            |
| 2184 | 24064   | Spry2         | sprouty homolog 2 (Drosophila)                                     | 0               | 2               | 3                | -2.20546            |
| 2185 | 22262   | Uox           | urate oxidase                                                      | 0               | 2               | 3                | -2.20507            |
| 2186 | 69536   | Hemk1         | HemK methyltransferase family member 1                             | 0               | 2               | 8                | -2.20301            |
| 2187 | 217169  | Tns4          | tensin 4                                                           | 0               | 2               | 2                | -2.20301            |
| 2188 | 14017   | Evi2a         | ecotropic viral integration site 2a                                | 0               | 2               | 3                | -2.203              |
| 2189 | 20737   | Spn           | sialophorin                                                        | 0               | 2               | 3                | -2.20266            |
| 2190 | 12400   | Cbfb          | core binding factor beta                                           | 0               | 2               | 3                | -2.20263            |
| 2191 | 50911   | Exosc9        | exosome component 9                                                | 0               | 2               | 3                | -2.20233            |
| 2192 | 12465   | Cct5          | chaperonin containing Tcp1, subunit 5 (epsilon)                    | 0               | 2               | 3                | -2.20212            |
| 2193 | 72082   | Cyp2c55       | cytochrome P450, family 2, subfamily c, polypeptide 55             | 0               | 2               | 2                | -2.20207            |
| 2194 | 73379   | Dcbld2        | discoidin, CUB and LCCL domain containing 2                        | 0               | 2               | 3                | -2.20031            |
| 2195 | 71952   | 2410016O06Rik | RIKEN cDNA 2410016O06 gene                                         | 0               | 2               | 2                | -2.19639            |
| 2196 | 18516   | Pbx3          | pre B cell leukemia homeobox 3                                     | 0               | 2               | 3                | -2.19626            |
| 2197 | 83602   | Gtf2a1        | general transcription factor II A, 1                               | 0               | 2               | 3                | -2.19527            |
| 2198 | 76701   | Ctrc          | chymotrypsin C (caldecrin)                                         | 0               | 2               | 3                | -2.19526            |
| 2199 | 72459   | Htatsf1       | HIV TAT specific factor 1                                          | 0               | 2               | 3                | -2.19479            |
| 2200 | 382588  | UNK           | NA                                                                 | 0               | 2               | 3                | -2.19135            |
| 2201 | 56456   | Actl6a        | actin-like 6A                                                      | 0               | 2               | 2                | -2.19074            |
| 2202 | 54611   | Pde3a         | phosphodiesterase 3A, cGMP inhibited                               | 0               | 2               | 3                | -2.18852            |
| 2203 | 14679   | Gnai3         | guanine nucleotide binding protein (G protein), alpha inhibiting 3 | 0               | 2               | 3                | -2.1869             |
| 2204 | 53867   | Col5a3        | collagen, type V, alpha 3                                          | 0               | 2               | 3                | -2.18591            |
| 2205 | 18600   | Padi2         | peptidyl arginine deiminase, type II                               | 0               | 2               | 3                | -2.18544            |
| 2206 | 116701  | Fgfr1         | fibroblast growth factor receptor-like 1                           | 0               | 2               | 3                | -2.18533            |
| 2207 | 11552   | Adra2b        | adrenergic receptor, alpha 2b                                      | 0               | 2               | 3                | -2.18516            |
| 2208 | 15372   | Hmx2          | H6 homeobox 2                                                      | 0               | 2               | 3                | -2.1839             |
| 2209 | 106052  | Fbxo4         | F-box protein 4                                                    | 0               | 2               | 3                | -2.18244            |
| 2210 | 56615   | Mgst1         | microsomal glutathione S-transferase 1                             | 0               | 2               | 3                | -2.18197            |
| 2211 | 103963  | Rpn1          | ribophorin I                                                       | 0               | 2               | 3                | -2.1815             |
| 2212 | 74185   | Gbe1          | glucan (1,4-alpha-), branching enzyme 1                            | 0               | 2               | 3                | -2.18139            |
| 2213 | 20259   | Scin          | scinderin                                                          | 0               | 2               | 3                | -2.17864            |
| 2214 | 384313  | UNK           | NA                                                                 | 0               | 2               | 2                | -2.1783             |
| 2215 | 242317  | LOC242317     | NA                                                                 | 0               | 2               | 3                | -2.17755            |
| 2216 | 99683   | Sec24b        | Sec24 related gene family, member B (S. cerevisiae)                | 0               | 2               | 3                | -2.1775             |

Candidates for positive regulators of normal growth (Fisher's)

| Rank | entrez# | Gene Symbol   | Gene name                                                       | enriched shRNAs | depleted shRNAs | no change shRNAs | average Fold Change |
|------|---------|---------------|-----------------------------------------------------------------|-----------------|-----------------|------------------|---------------------|
| 2217 | 11550   | Adra1d        | adrenergic receptor, alpha 1d                                   | 0               | 2               | 3                | -2.1766             |
| 2218 | 76654   | Upp2          | uridine phosphorylase 2                                         | 0               | 2               | 2                | -2.17539            |
| 2219 | 22210   | Ube2b         | ubiquitin-conjugating enzyme E2B, RAD6 homology (S. cerevisiae) | 0               | 2               | 3                | -2.17529            |
| 2220 | 17153   | Mal           | myelin and lymphocyte protein, T cell differentiation protein   | 0               | 2               | 3                | -2.17383            |
| 2221 | 338467  | Morc3         | microrchidia 3                                                  | 0               | 2               | 3                | -2.17346            |
| 2222 | 353188  | Adam32        | a disintegrin and metallopeptidase domain 32                    | 0               | 2               | 3                | -2.17277            |
| 2223 | 195434  | Utp14b        | UTP14, U3 small nucleolar ribonucleoprotein, homolog B (yeast)  | 0               | 2               | 3                | -2.17112            |
| 2224 | 20997   | T             | brachyury                                                       | 0               | 2               | 3                | -2.1706             |
| 2225 | 17756   | Mtap2         | microtubule-associated protein 2                                | 0               | 2               | 3                | -2.17032            |
| 2226 | 104444  | Rexo2         | REX2, RNA exonuclease 2 homolog (S. cerevisiae)                 | 0               | 2               | 3                | -2.16895            |
| 2227 | 13048   | Cutl2         | cut-like homeobox 2                                             | 0               | 2               | 3                | -2.16895            |
| 2228 | 209776  | Gpr139        | G protein-coupled receptor 139                                  | 0               | 2               | 2                | -2.16859            |
| 2229 | 14950   | H13           | histocompatibility 13                                           | 0               | 2               | 3                | -2.16849            |
| 2230 | 230779  | Serinc2       | serine incorporator 2                                           | 0               | 2               | 3                | -2.16607            |
| 2231 | 18139   | Zfml          | zinc finger, matrin-like                                        | 0               | 2               | 2                | -2.16593            |
| 2232 | 243862  | BC050099      | pregnancy-specific glycoprotein 22                              | 0               | 2               | 3                | -2.1651             |
| 2233 | 214944  | Mobk12b       | MOB kinase activator 3B                                         | 0               | 2               | 3                | -2.16496            |
| 2234 | 12803   | Cntf          | ciliary neurotrophic factor                                     | 0               | 2               | 3                | -2.16464            |
| 2235 | 333182  | Cox6b2        | cytochrome c oxidase subunit VIb polypeptide 2                  | 0               | 2               | 3                | -2.16402            |
| 2236 | 387347  | Tas2r118      | taste receptor, type 2, member 118                              | 0               | 2               | 2                | -2.16379            |
| 2237 | 140917  | Dclre1b       | DNA cross-link repair 1B, PSO2 homolog (S. cerevisiae)          | 0               | 2               | 2                | -2.16136            |
| 2238 | 258815  | Olf1218       | olfactory receptor 1218                                         | 0               | 2               | 3                | -2.16014            |
| 2239 | 73287   | 1700040L02Rik | RIKEN cDNA 1700040L02 gene                                      | 0               | 2               | 2                | -2.15988            |
| 2240 | 21753   | Tes           | testis derived transcript                                       | 0               | 2               | 3                | -2.15923            |
| 2241 | 21345   | Tagln         | transgelin                                                      | 0               | 2               | 1                | -2.15597            |
| 2242 | 399673  | Tdpoz2        | TD and POZ domain containing 2                                  | 0               | 2               | 3                | -2.15463            |
| 2243 | 72047   | Ddx42         | DEAD (Asp-Glu-Ala-Asp) box polypeptide 42                       | 0               | 2               | 3                | -2.15345            |
| 2244 | 329626  | A930011G24    | predicted gene 12541                                            | 0               | 2               | 3                | -2.15196            |
| 2245 | 19076   | Prim2         | DNA primase, p58 subunit                                        | 0               | 2               | 3                | -2.14676            |
| 2246 | 24000   | Ptpn21        | protein tyrosine phosphatase, non-receptor type 21              | 0               | 2               | 3                | -2.14421            |
| 2247 | 226251  | Ablim1        | actin-binding LIM protein 1                                     | 0               | 2               | 3                | -2.14373            |
| 2248 | 223917  | BC031593      | keratin 79                                                      | 0               | 2               | 3                | -2.14299            |
| 2249 | 258858  | Olf371        | olfactory receptor 371                                          | 0               | 2               | 3                | -2.1428             |
| 2250 | 330157  | F830003B07    | NA                                                              | 0               | 2               | 2                | -2.14272            |
| 2251 | 75219   | Dusp18        | dual specificity phosphatase 18                                 | 0               | 2               | 3                | -2.14267            |
| 2252 | 22092   | Tsga2         | radial spoke head 1 homolog (Chlamydomonas)                     | 0               | 2               | 3                | -2.14096            |
| 2253 | 19305   | Pex5          | peroxisomal biogenesis factor 5                                 | 0               | 2               | 3                | -2.14076            |



Candidates for positive regulators of normal growth (Fisher's)

| Rank | entrez# | Gene Symbol   | Gene name                                                                       | enriched shRNAs | depleted shRNAs | no change shRNAs | average Fold Change |
|------|---------|---------------|---------------------------------------------------------------------------------|-----------------|-----------------|------------------|---------------------|
| 2254 | 223870  | Senp1         | SUMO1/sentrin specific peptidase 1                                              | 0               | 2               | 3                | -2.14055            |
| 2255 | 70061   | Sdro          | 4short chain dehydrogenase/reductase family 9C, member 7                        | 0               | 2               | 3                | -2.14028            |
| 2256 | 17703   | Msx3          | homeobox, msh-like 3                                                            | 0               | 2               | 3                | -2.13788            |
| 2257 | 106389  | Eaf2          | ELL associated factor 2                                                         | 0               | 2               | 2                | -2.13738            |
| 2258 | 109225  | Ms4a7         | membrane-spanning 4-domains, subfamily A, member 7                              | 0               | 2               | 2                | -2.13726            |
| 2259 | 21940   | Tnfrsf7       | CD27 antigen                                                                    | 0               | 2               | 3                | -2.13685            |
| 2260 | 232078  | BC051244      | threonine synthase-like 2 (bacterial)                                           | 0               | 2               | 3                | -2.13519            |
| 2261 | 78416   | Rnase6        | ribonuclease, RNase A family, 6                                                 | 0               | 2               | 3                | -2.13479            |
| 2262 | 56321   | Aatf          | apoptosis antagonizing transcription factor                                     | 0               | 2               | 3                | -2.13479            |
| 2263 | 17237   | Mgrn1         | mahogunin, ring finger 1                                                        | 0               | 2               | 3                | -2.1347             |
| 2264 | 74039   | Nfam1         | Nfat activating molecule with ITAM motif 1                                      | 0               | 2               | 3                | -2.13375            |
| 2265 | 18119   | Nodal         | nodal                                                                           | 0               | 2               | 3                | -2.13345            |
| 2266 | 353169  | Slc2a12       | solute carrier family 2 (facilitated glucose transporter), member 12            | 0               | 2               | 3                | -2.13278            |
| 2267 | 16164   | Il13ra1       | interleukin 13 receptor, alpha 1                                                | 0               | 2               | 3                | -2.13259            |
| 2268 | 17089   | Lyar          | Ly1 antibody reactive clone                                                     | 0               | 2               | 3                | -2.13101            |
| 2269 | 110542  | Amhr2         | anti-Mullerian hormone type 2 receptor                                          | 0               | 2               | 3                | -2.13079            |
| 2270 | 72322   | Xpo5          | exportin 5                                                                      | 0               | 2               | 2                | -2.13075            |
| 2271 | 66204   | Acyp1         | acylphosphatase 1, erythrocyte (common) type                                    | 0               | 2               | 2                | -2.12846            |
| 2272 | 330552  | A230097C02    | predicted gene 9801                                                             | 0               | 2               | 2                | -2.12743            |
| 2273 | 243372  | C130032F08Rik | zinc finger protein 775                                                         | 0               | 2               | 3                | -2.1264             |
| 2274 | 13828   | Epb4.2        | erythrocyte protein band 4.2                                                    | 0               | 2               | 3                | -2.12625            |
| 2275 | 208158  | Map6d1        | MAP6 domain containing 1                                                        | 0               | 2               | 2                | -2.12574            |
| 2276 | 74469   | Taf7l         | TAF7-like RNA polymerase II, TATA box binding protein (TBP)-associated factor   | 0               | 2               | 3                | -2.12389            |
| 2277 | 20648   | Snta1         | syntrophin, acidic 1                                                            | 0               | 2               | 3                | -2.12227            |
| 2278 | 21648   | Dynlt1        | dynein light chain Tctex-type 1D                                                | 0               | 2               | 3                | -2.12217            |
| 2279 | 75991   | 5033405K12Rik | SLAIN motif family, member 2                                                    | 0               | 2               | 2                | -2.12186            |
| 2280 | 76263   | Gstk1         | glutathione S-transferase kappa 1                                               | 0               | 2               | 3                | -2.12184            |
| 2281 | 433890  | UNK           | NA                                                                              | 0               | 2               | 3                | -2.1205             |
| 2282 | 241877  | Slc10a5       | solute carrier family 10 (sodium/bile acid cotransporter family), member 5      | 0               | 2               | 3                | -2.11967            |
| 2283 | 244867  | Arhgap20      | Rho GTPase activating protein 20                                                | 0               | 2               | 3                | -2.11877            |
| 2284 | 75705   | Eif4b         | eukaryotic translation initiation factor 4B                                     | 0               | 2               | 2                | -2.1185             |
| 2285 | 67578   | 4930424G05Rik | protein associated with topoisomerase II homolog 2 (yeast)                      | 0               | 2               | 3                | -2.11815            |
| 2286 | 280668  | Adam1a        | a disintegrin and metallopeptidase domain 1a                                    | 0               | 2               | 3                | -2.11802            |
| 2287 | 235623  | Scap          | SREBF chaperone                                                                 | 0               | 2               | 2                | -2.11653            |
| 2288 | 72180   | Zfp661        | zinc finger protein 661                                                         | 0               | 2               | 3                | -2.11646            |
| 2289 | 114644  | Slc13a3       | solute carrier family 13 (sodium-dependent dicarboxylate transporter), member 3 | 0               | 2               | 3                | -2.11515            |
| 2290 | 13836   | Epha2         | Eph receptor A2                                                                 | 0               | 2               | 3                | -2.1149             |

Candidates for positive regulators of normal growth (Fisher's)

| Rank | entrez# | Gene Symbol   | Gene name                                                                         | enriched shRNAs | depleted shRNAs | no change shRNAs | average Fold Change |
|------|---------|---------------|-----------------------------------------------------------------------------------|-----------------|-----------------|------------------|---------------------|
| 2291 | 13642   | Efnb2         | ephrin B2                                                                         | 0               | 2               | 3                | -2.11476            |
| 2292 | 26572   | Cops3         | COP9 (constitutive photomorphogenic) homolog, subunit 3 (Arabidopsis thaliana)    | 0               | 2               | 3                | -2.11426            |
| 2293 | 101869  | Unc45a        | unc-45 homolog A (C. elegans)                                                     | 0               | 2               | 3                | -2.1129             |
| 2294 | 435219  | UNK           | NA                                                                                | 0               | 2               | 3                | -2.11206            |
| 2295 | 328110  | Prpf39        | PRP39 pre-mRNA processing factor 39 homolog (yeast)                               | 0               | 2               | 3                | -2.11184            |
| 2296 | 18987   | Pou2f2        | POU domain, class 2, transcription factor 2                                       | 0               | 2               | 3                | -2.11047            |
| 2297 | 93880   | Pcdhb9        | protocadherin beta 9                                                              | 0               | 2               | 3                | -2.11021            |
| 2298 | 51885   | D2Erd435e     | tubulin, gamma complex associated protein 4                                       | 0               | 2               | 3                | -2.11013            |
| 2299 | 19711   | Resp18        | regulated endocrine-specific protein 18                                           | 0               | 2               | 3                | -2.11003            |
| 2300 | 258113  | Olf748        | olfactory receptor 748                                                            | 0               | 2               | 3                | -2.10991            |
| 2301 | 20312   | Cx3cl1        | chemokine (C-X3-C motif) ligand 1                                                 | 0               | 2               | 3                | -2.10973            |
| 2302 | 14158   | Fert2         | fer (fms/fps related) protein kinase, testis specific 2                           | 0               | 2               | 3                | -2.10763            |
| 2303 | 109006  | Ciapin1       | cytokine induced apoptosis inhibitor 1                                            | 0               | 2               | 2                | -2.10731            |
| 2304 | 17308   | Mgat1         | mannoside acetylglucosaminyltransferase 1                                         | 0               | 2               | 3                | -2.10662            |
| 2305 | 432447  | LOC432447     | phosphatidylethanolamine-binding protein pseudogene                               | 0               | 2               | 3                | -2.10623            |
| 2306 | 11867   | Arpc1b        | actin related protein 2/3 complex, subunit 1B                                     | 0               | 2               | 3                | -2.10609            |
| 2307 | 76484   | Knkc1         | kinase non-catalytic C-lobe domain (KIND) containing 1                            | 0               | 2               | 3                | -2.10595            |
| 2308 | 14066   | F3            | coagulation factor III                                                            | 0               | 2               | 3                | -2.10591            |
| 2309 | 72972   | Gcap14        | granule cell antiserum positive 14                                                | 0               | 2               | 2                | -2.10542            |
| 2310 | 258764  | Olf1099       | olfactory receptor 1099                                                           | 0               | 2               | 2                | -2.10479            |
| 2311 | 68691   | 1110028C15Rik | RIKEN cDNA 1110028C15 gene                                                        | 0               | 2               | 3                | -2.10477            |
| 2312 | 12558   | Cdh2          | cadherin 2                                                                        | 0               | 2               | 3                | -2.10433            |
| 2313 | 15193   | Hdgfrp2       | hepatoma-derived growth factor, related protein 2                                 | 0               | 2               | 3                | -2.10268            |
| 2314 | 20361   | Sema7a        | sema domain, immunoglobulin domain (Ig), and GPI membrane anchor, (semaphorin) 7A | 0               | 2               | 3                | -2.10137            |
| 2315 | 93734   | Mpv17l        | Mpv17 transgene, kidney disease mutant-like                                       | 0               | 2               | 3                | -2.10124            |
| 2316 | 378460  | Pram1         | PML-RAR alpha-regulated adaptor molecule 1                                        | 0               | 2               | 3                | -2.10061            |
| 2317 | 330998  | B230218L05Rik | ankyrin repeat domain 34C                                                         | 0               | 2               | 3                | -2.09972            |
| 2318 | 277343  | Wfdc8         | WAP four-disulfide core domain 8                                                  | 0               | 2               | 3                | -2.09938            |
| 2319 | 14536   | Nr6a1         | nuclear receptor subfamily 6, group A, member 1                                   | 0               | 2               | 3                | -2.09795            |
| 2320 | 110391  | Qdpr          | quinoid dihydropteridine reductase                                                | 0               | 2               | 3                | -2.09777            |
| 2321 | 435839  | UNK           | NA                                                                                | 0               | 2               | 3                | -2.09689            |
| 2322 | 224753  | H2-M10.4      | histocompatibility 2, M region locus 10.4                                         | 0               | 2               | 3                | -2.09641            |
| 2323 | 12977   | Csf1          | colony stimulating factor 1 (macrophage)                                          | 0               | 2               | 3                | -2.0959             |
| 2324 | 110310  | Krt2-7        | keratin 7                                                                         | 0               | 2               | 3                | -2.09535            |
| 2325 | 243043  | Kctd8         | potassium channel tetramerisation domain containing 8                             | 0               | 2               | 3                | -2.09503            |
| 2326 | 109620  | Dsp           | desmoplakin                                                                       | 0               | 2               | 3                | -2.09431            |
| 2327 | 66708   | Krtap3-2      | keratin associated protein 3-2                                                    | 0               | 2               | 2                | -2.09266            |

Candidates for positive regulators of normal growth (Fisher's)

| Rank | entrez# | Gene Symbol   | Gene name                                                                                       | enriched shRNAs | depleted shRNAs | no change shRNAs | average Fold Change |
|------|---------|---------------|-------------------------------------------------------------------------------------------------|-----------------|-----------------|------------------|---------------------|
| 2328 | 21815   | Tgif          | TGFB-induced factor homeobox 1                                                                  | 0               | 2               | 3                | -2.09232            |
| 2329 | 18472   | Pafah1b1      | platelet-activating factor acetylhydrolase, isoform 1b, subunit 1                               | 0               | 2               | 3                | -2.0912             |
| 2330 | 20354   | Sema4d        | sema domain, immunoglobulin domain (Ig), transmembrane domain (TM) and short cytoplasmic domain | 0               | 2               | 3                | -2.09097            |
| 2331 | 269951  | Idh2          | isocitrate dehydrogenase 2 (NADP+), mitochondrial                                               | 0               | 2               | 3                | -2.09069            |
| 2332 | 56505   | Ruvb1         | RuvB-like protein 1                                                                             | 0               | 2               | 2                | -2.08972            |
| 2333 | 103655  | Sec14l4       | SEC14-like 4 ( <i>S. cerevisiae</i> )                                                           | 0               | 2               | 3                | -2.08944            |
| 2334 | 258788  | Olfrl246      | olfactory receptor 1246                                                                         | 0               | 2               | 3                | -2.08805            |
| 2335 | 435406  | UNK           | NA                                                                                              | 0               | 2               | 3                | -2.08709            |
| 2336 | 77629   | 4930544G21Rik | SPHK1 interactor, AKAP domain containing                                                        | 0               | 2               | 3                | -2.08657            |
| 2337 | 67037   | Pmf1          | polyamine-modulated factor 1                                                                    | 0               | 2               | 3                | -2.08656            |
| 2338 | 16331   | Inpp5d        | inositol polyphosphate-5-phosphatase D                                                          | 0               | 2               | 2                | -2.08648            |
| 2339 | 15110   | Hand1         | heart and neural crest derivatives expressed transcript 1                                       | 0               | 2               | 3                | -2.08644            |
| 2340 | 76411   | 1700019E19Rik | RIKEN cDNA 1700019E19 gene                                                                      | 0               | 2               | 2                | -2.08629            |
| 2341 | 66043   | Atp5d         | ATP synthase, H+ transporting, mitochondrial F1 complex, delta subunit                          | 0               | 2               | 3                | -2.08595            |
| 2342 | 214601  | Slc10a3       | solute carrier family 10 (sodium/bile acid cotransporter family), member 3                      | 0               | 2               | 3                | -2.08568            |
| 2343 | 22164   | Tnfsf4        | tumor necrosis factor (ligand) superfamily, member 4                                            | 0               | 2               | 3                | -2.08431            |
| 2344 | 224109  | Lrrc33        | leucine rich repeat containing 33                                                               | 0               | 2               | 2                | -2.0828             |
| 2345 | 74200   | 2810403A07Rik | RIKEN cDNA 2810403A07 gene                                                                      | 0               | 2               | 2                | -2.08213            |
| 2346 | 218038  | Amph          | amphiphysin                                                                                     | 0               | 2               | 3                | -2.08013            |
| 2347 | 268756  | Gulo          | gulonolactone (L-) oxidase                                                                      | 0               | 2               | 2                | -2.08008            |
| 2348 | 241118  | Accn4         | amiloride-sensitive cation channel 4, pituitary                                                 | 0               | 2               | 2                | -2.07765            |
| 2349 | 17380   | Mme           | membrane metallo endopeptidase                                                                  | 0               | 2               | 3                | -2.07721            |
| 2350 | 14027   | Evpl          | envoplakin                                                                                      | 0               | 2               | 3                | -2.07607            |
| 2351 | 26908   | Eif2s3y       | eukaryotic translation initiation factor 2, subunit 3, structural gene Y-linked                 | 0               | 2               | 3                | -2.07503            |
| 2352 | 80886   | Senp3         | SUMO/sentrin specific peptidase 3                                                               | 0               | 2               | 3                | -2.07396            |
| 2353 | 64075   | Smoc1         | SPARC related modular calcium binding 1                                                         | 0               | 2               | 3                | -2.07339            |
| 2354 | 57913   | Lrdd          | leucine-rich and death domain containing                                                        | 0               | 2               | 3                | -2.07303            |
| 2355 | 17700   | Gdf8          | myostatin                                                                                       | 0               | 2               | 3                | -2.07247            |
| 2356 | 383548  | Serpinh3b     | serine (or cysteine) peptidase inhibitor, clade B (ovalbumin), member 3B                        | 0               | 2               | 3                | -2.07173            |
| 2357 | 215708  | C030011O14Rik | family with sequence similarity 73, member A                                                    | 0               | 2               | 3                | -2.07123            |
| 2358 | 97165   | Hmgb2         | high mobility group box 2                                                                       | 0               | 2               | 3                | -2.07091            |
| 2359 | 70333   | Cd3eap        | CD3E antigen, epsilon polypeptide associated protein                                            | 0               | 2               | 3                | -2.0693             |
| 2360 | 15218   | Foxn1         | forkhead box N1                                                                                 | 0               | 2               | 3                | -2.06926            |
| 2361 | 108148  | Galnt2        | UDP-N-acetyl-alpha-D-galactosamine:polypeptide N-acetylgalactosaminyltransferase 2              | 0               | 2               | 3                | -2.06773            |
| 2362 | 170757  | Eltf1         | EGF, latrophilin seven transmembrane domain containing 1                                        | 0               | 2               | 3                | -2.06686            |
| 2363 | 18195   | Nsf           | N-ethylmaleimide sensitive fusion protein                                                       | 0               | 2               | 3                | -2.06546            |
| 2364 | 12450   | Ccng1         | cyclin G1                                                                                       | 0               | 2               | 3                | -2.06544            |

Candidates for positive regulators of normal growth (Fisher's)

| Rank | entrez# | Gene Symbol   | Gene name                                                    | enriched shRNAs | depleted shRNAs | no change shRNAs | average Fold Change |
|------|---------|---------------|--------------------------------------------------------------|-----------------|-----------------|------------------|---------------------|
| 2365 | 13115   | Cyp27b1       | cytochrome P450, family 27, subfamily b, polypeptide 1       | 0               | 2               | 3                | -2.06514            |
| 2366 | 14762   | Gpr33         | G protein-coupled receptor 33                                | 0               | 2               | 3                | -2.06371            |
| 2367 | 232685  | AB041803      | cDNA sequence AB041803                                       | 0               | 2               | 3                | -2.06301            |
| 2368 | 229595  | Adamts14      | ADAMTS-like 4                                                | 0               | 2               | 3                | -2.06169            |
| 2369 | 66515   | Cul7          | cullin 7                                                     | 0               | 2               | 3                | -2.06143            |
| 2370 | 50770   | Atp11a        | ATPase, class VI, type 11A                                   | 0               | 2               | 3                | -2.06094            |
| 2371 | 259042  | Olf1351       | olfactory receptor 1351                                      | 0               | 2               | 2                | -2.0583             |
| 2372 | 16568   | Kif3a         | kinesin family member 3A                                     | 0               | 2               | 3                | -2.05798            |
| 2373 | 231201  | AF366264      | cDNA sequence AF366264                                       | 0               | 2               | 3                | -2.05757            |
| 2374 | 224613  | Flywch1       | FLYWCH-type zinc finger 1                                    | 0               | 2               | 2                | -2.05741            |
| 2375 | 79044   | Mrps34        | mitochondrial ribosomal protein S34                          | 0               | 2               | 3                | -2.05736            |
| 2376 | 22371   | Vwf           | Von Willebrand factor homolog                                | 0               | 2               | 3                | -2.05722            |
| 2377 | 212862  | Chpt1         | choline phosphotransferase 1                                 | 0               | 2               | 3                | -2.05568            |
| 2378 | 23934   | Ly6h          | lymphocyte antigen 6 complex, locus H                        | 0               | 2               | 2                | -2.05562            |
| 2379 | 20710   | Serpinb9e     | serine (or cysteine) peptidase inhibitor, clade B, member 9e | 0               | 2               | 3                | -2.05537            |
| 2380 | 14990   | H2-M2         | histocompatibility 2, M region locus 2                       | 0               | 2               | 2                | -2.05423            |
| 2381 | 15925   | Ide           | insulin degrading enzyme                                     | 0               | 2               | 3                | -2.05314            |
| 2382 | 69257   | Elf2          | E74-like factor 2                                            | 0               | 2               | 3                | -2.05187            |
| 2383 | 70231   | Gorasp2       | golgi reassembly stacking protein 2                          | 0               | 2               | 3                | -2.05107            |
| 2384 | 50918   | Myadm         | myeloid-associated differentiation marker                    | 0               | 2               | 3                | -2.05036            |
| 2385 | 69171   | 1810031K17Rik | RIKEN cDNA 1810031K17 gene                                   | 0               | 2               | 3                | -2.04999            |
| 2386 | 80283   | Abtb1         | ankyrin repeat and BTB (POZ) domain containing 1             | 0               | 2               | 3                | -2.0499             |
| 2387 | 27281   | Hrasls        | HRAS-like suppressor                                         | 0               | 2               | 3                | -2.04975            |
| 2388 | 74254   | Xab1          | GPN-loop GTPase 1                                            | 0               | 2               | 3                | -2.04964            |
| 2389 | 228960  | Stx16         | syntaxin 16                                                  | 0               | 2               | 3                | -2.04914            |
| 2390 | 18391   | Oprs1         | sigma non-opioid intracellular receptor 1                    | 0               | 2               | 3                | -2.04624            |
| 2391 | 66138   | Wbscr22       | Williams Beuren syndrome chromosome region 22                | 0               | 2               | 3                | -2.04594            |
| 2392 | 69129   | Pex11c        | peroxisomal biogenesis factor 11 gamma                       | 0               | 2               | 3                | -2.04565            |
| 2393 | 107798  | V1rb5         | NA                                                           | 0               | 2               | 3                | -2.0456             |
| 2394 | 12014   | Bach2         | BTB and CNC homology 2                                       | 0               | 2               | 3                | -2.04445            |
| 2395 | 15445   | Hpd           | 4-hydroxyphenylpyruvic acid dioxygenase                      | 0               | 2               | 3                | -2.04415            |
| 2396 | 71609   | Tradd         | TNFRSF1A-associated via death domain                         | 0               | 2               | 2                | -2.04319            |
| 2397 | 108083  | Pip5k2b       | phosphatidylinositol-5-phosphate 4-kinase, type II, beta     | 0               | 2               | 3                | -2.04113            |
| 2398 | 207596  | Thsd4         | thrombospondin, type I, domain containing 4                  | 0               | 2               | 3                | -2.03965            |
| 2399 | 208266  | Dot1l         | DOT1-like, histone H3 methyltransferase (S. cerevisiae)      | 0               | 2               | 3                | -2.03827            |
| 2400 | 67554   | Slc25a30      | solute carrier family 25, member 30                          | 0               | 2               | 2                | -2.03792            |
| 2401 | 50540   | Igpb1b        | immunoglobulin (CD79A) binding protein 1b                    | 0               | 2               | 3                | -2.03779            |

Candidates for positive regulators of normal growth (Fisher's)

| Rank | entrez# | Gene Symbol   | Gene name                                                                 | enriched shRNAs | depleted shRNAs | no change shRNAs | average Fold Change |
|------|---------|---------------|---------------------------------------------------------------------------|-----------------|-----------------|------------------|---------------------|
| 2402 | 14702   | Gng2          | guanine nucleotide binding protein (G protein), gamma 2                   | 0               | 2               | 3                | -2.03746            |
| 2403 | 328789  | Tmhs          | lipoma HMGIC fusion partner-like 5                                        | 0               | 2               | 3                | -2.03717            |
| 2404 | 18521   | Pcbp2         | poly(rC) binding protein 2                                                | 0               | 2               | 3                | -2.0368             |
| 2405 | 64339   | Fndc4         | fibronectin type III domain containing 4                                  | 0               | 2               | 3                | -2.03574            |
| 2406 | 16801   | Arhgef1       | Rho guanine nucleotide exchange factor (GEF) 1                            | 0               | 2               | 3                | -2.03397            |
| 2407 | 75273   | Pelp1         | proline, glutamic acid and leucine rich protein 1                         | 0               | 2               | 2                | -2.03347            |
| 2408 | 22163   | Tnfrsf4       | tumor necrosis factor receptor superfamily, member 4                      | 0               | 2               | 3                | -2.03268            |
| 2409 | 237831  | Slc13a5       | solute carrier family 13 (sodium-dependent citrate transporter), member 5 | 0               | 2               | 3                | -2.03208            |
| 2410 | 227522  | Rpp38         | ribonuclease P/MRP 38 subunit (human)                                     | 0               | 2               | 3                | -2.03191            |
| 2411 | 74215   | 1700007N14Rik | NA                                                                        | 0               | 2               | 3                | -2.03047            |
| 2412 | 12757   | Cita          | clathrin, light polypeptide (Lca)                                         | 0               | 2               | 3                | -2.02928            |
| 2413 | 24074   | Taf7          | TAF7 RNA polymerase II, TATA box binding protein (TBP)-associated factor  | 0               | 2               | 3                | -2.02826            |
| 2414 | 279572  | Tlr13         | toll-like receptor 13                                                     | 0               | 2               | 3                | -2.02824            |
| 2415 | 66437   | Fis1          | fission 1 (mitochondrial outer membrane) homolog (yeast)                  | 0               | 2               | 3                | -2.02775            |
| 2416 | 14560   | Gdf10         | growth differentiation factor 10                                          | 0               | 2               | 3                | -2.02769            |
| 2417 | 12457   | Ccrn4l        | CCR4 carbon catabolite repression 4-like ( <i>S. cerevisiae</i> )         | 0               | 2               | 3                | -2.02718            |
| 2418 | 11699   | Ambp          | alpha 1 microglobulin/bikunin                                             | 0               | 2               | 3                | -2.02495            |
| 2419 | 213389  | Prdm9         | PR domain containing 9                                                    | 0               | 2               | 3                | -2.02448            |
| 2420 | 110304  | Gira3         | glycine receptor, alpha 3 subunit                                         | 0               | 2               | 3                | -2.02389            |
| 2421 | 230737  | Gnl2          | guanine nucleotide binding protein-like 2 (nucleolar)                     | 0               | 2               | 3                | -2.0236             |
| 2422 | 319803  | A430090L17Rik | RIKEN cDNA A430090L17 gene                                                | 0               | 2               | 2                | -2.02337            |
| 2423 | 432637  | LOC432637     | predicted gene 5433                                                       | 0               | 2               | 3                | -2.023              |
| 2424 | 231506  | AI461788      | lin-54 homolog ( <i>C. elegans</i> )                                      | 0               | 2               | 3                | -2.02228            |
| 2425 | 20585   | Smarca3       | helicase-like transcription factor                                        | 0               | 2               | 3                | -2.01919            |
| 2426 | 53600   | Timm23        | translocase of inner mitochondrial membrane 23 homolog (yeast)            | 0               | 2               | 3                | -2.01844            |
| 2427 | 240063  | BC052046      | zinc finger protein 811                                                   | 0               | 2               | 3                | -2.0184             |
| 2428 | 433649  | UNK           | NA                                                                        | 0               | 2               | 3                | -2.01828            |
| 2429 | 22031   | Traf3         | TNF receptor-associated factor 3                                          | 0               | 2               | 3                | -2.01788            |
| 2430 | 80297   | Spnb4         | spectrin beta 4                                                           | 0               | 2               | 2                | -2.01779            |
| 2431 | 237979  | Sdk2          | sidekick homolog 2 (chicken)                                              | 0               | 2               | 3                | -2.01744            |
| 2432 | 13427   | Dync1i2       | dynein cytoplasmic 1 intermediate chain 2                                 | 0               | 2               | 3                | -2.01734            |
| 2433 | 14528   | Gch1          | GTP cyclohydrolase 1                                                      | 0               | 2               | 3                | -2.01725            |
| 2434 | 328967  | 4933429F08Rik | Rho guanine nucleotide exchange factor (GEF) 37                           | 0               | 2               | 3                | -2.01717            |
| 2435 | 70988   | 4931428L18Rik | RIKEN cDNA 4931428L18 gene                                                | 0               | 2               | 3                | -2.01588            |
| 2436 | 21987   | Tpd52l1       | tumor protein D52-like 1                                                  | 0               | 2               | 3                | -2.01582            |
| 2437 | 108705  | Pttg1ip       | pituitary tumor-transforming 1 interacting protein                        | 0               | 2               | 3                | -2.01557            |
| 2438 | 18679   | Phka1         | phosphorylase kinase alpha 1                                              | 0               | 2               | 3                | -2.01552            |

Candidates for positive regulators of normal growth (Fisher's)

| Rank | entrez# | Gene Symbol   | Gene name                                                                                          | enriched shRNAs | depleted shRNAs | no change shRNAs | average Fold Change |
|------|---------|---------------|----------------------------------------------------------------------------------------------------|-----------------|-----------------|------------------|---------------------|
| 2439 | 73046   | Glrx5         | glutaredoxin 5 homolog (S. cerevisiae)                                                             | 0               | 2               | 3                | -2.01526            |
| 2440 | 67996   | Sfrs6         | serine/arginine-rich splicing factor 6                                                             | 0               | 2               | 3                | -2.01511            |
| 2441 | 14254   | Flt1          | FMS-like tyrosine kinase 1                                                                         | 0               | 2               | 3                | -2.01437            |
| 2442 | 11798   | Birc4         | X-linked inhibitor of apoptosis                                                                    | 0               | 2               | 3                | -2.01387            |
| 2443 | 434423  | Dppa5         | developmental pluripotency associated 5A                                                           | 0               | 2               | 3                | -2.01366            |
| 2444 | 170653  | Krtap16-3     | NA                                                                                                 | 0               | 2               | 2                | -2.01363            |
| 2445 | 75710   | Rbm12         | RNA binding motif protein 12                                                                       | 0               | 2               | 3                | -2.01354            |
| 2446 | 140488  | Igf2bp3       | insulin-like growth factor 2 mRNA binding protein 3                                                | 0               | 2               | 3                | -2.01343            |
| 2447 | 80732   | Mynn          | myoneurin                                                                                          | 0               | 2               | 3                | -2.01291            |
| 2448 | 18109   | Mycn          | v-myc myelocytomatosis viral related oncogene, neuroblastoma derived (avian)                       | 0               | 2               | 3                | -2.01281            |
| 2449 | 23954   | Nek3          | NIMA (never in mitosis gene a)-related expressed kinase 3                                          | 0               | 2               | 3                | -2.0127             |
| 2450 | 116940  | Ncoa6ip       | trimethylguanosine synthase homolog (S. cerevisiae)                                                | 0               | 2               | 3                | -2.01157            |
| 2451 | 238395  | LOC238395     | serine (or cysteine) peptidase inhibitor, clade A (alpha-1 antiproteinase, antitrypsin), member 3J | 0               | 2               | 3                | -2.01121            |
| 2452 | 70831   | 4733401H21Rik | keratin associated protein 31-1                                                                    | 0               | 2               | 3                | -2.01112            |
| 2453 | 56458   | Foxo1         | forkhead box O1                                                                                    | 0               | 2               | 3                | -2.0103             |
| 2454 | 108043  | Chrnb3        | cholinergic receptor, nicotinic, beta polypeptide 3                                                | 0               | 2               | 3                | -2.00992            |
| 2455 | 27404   | Abca8b        | ATP-binding cassette, sub-family A (ABC1), member 8b                                               | 0               | 2               | 3                | -2.00734            |
| 2456 | 19303   | Pxn           | paxillin                                                                                           | 0               | 2               | 3                | -2.00703            |
| 2457 | 21804   | Tgfb1i1       | transforming growth factor beta 1 induced transcript 1                                             | 0               | 2               | 3                | -2.00659            |
| 2458 | 258726  | Olf599        | olfactory receptor 599                                                                             | 0               | 2               | 2                | -2.00514            |
| 2459 | 223527  | Eny2          | enhancer of yellow 2 homolog (Drosophila)                                                          | 0               | 2               | 2                | -2.00452            |
| 2460 | 194162  | BC035954      | NA                                                                                                 | 0               | 2               | 3                | -2.00431            |
| 2461 | 22628   | Ywhag         | tyrosine 3-monooxygenase/tryptophan 5-monooxygenase activation protein, gamma polypeptide          | 0               | 2               | 3                | -2.00388            |
| 2462 | 20305   | Ccl6          | chemokine (C-C motif) ligand 6                                                                     | 0               | 2               | 3                | -2.00315            |
| 2463 | 14294   | Fpr1          | formyl peptide receptor 3                                                                          | 0               | 2               | 3                | -2.00266            |
| 2464 | 68239   | 2410039E07Rik | keratin 42                                                                                         | 0               | 2               | 3                | -2.0022             |
| 2465 | 108105  | B3gnt5        | UDP-GlcNAc:betaGal beta-1,3-N-acetylglucosaminyltransferase 5                                      | 0               | 2               | 3                | -2.00207            |
| 2466 | 56419   | Diap3         | diaphanous homolog 3 (Drosophila)                                                                  | 0               | 2               | 3                | -2.00136            |
| 2467 | 209488  | Hsh2d         | hematopoietic SH2 domain containing                                                                | 0               | 2               | 3                | -2.00133            |
| 2468 | 16330   | Inpp5b        | inositol polyphosphate-5-phosphatase B                                                             | 0               | 2               | 3                | -2.00114            |
| 2469 | 29807   | Tpk1          | thiamine pyrophosphokinase                                                                         | 0               | 2               | 3                | -2.00073            |
| 2470 | 56066   | Cxcl11        | chemokine (C-X-C motif) ligand 11                                                                  | 0               | 2               | 3                | -2.00073            |
| 2471 | 108812  | Als2cr12      | amyotrophic lateral sclerosis 2 (juvenile) chromosome region, candidate 12 (human)                 | 0               | 2               | 2                | -2.00028            |
| 2472 | 20523   | Slc25a14      | solute carrier family 25 (mitochondrial carrier, brain), member 14                                 | 0               | 2               | 3                | -1.99967            |
| 2473 | 65973   | Asph          | aspartate-beta-hydroxylase                                                                         | 0               | 2               | 3                | -1.99868            |
| 2474 | 19122   | Prnp          | prion protein                                                                                      | 0               | 2               | 3                | -1.99868            |
| 2475 | 53605   | Nap111        | nucleosome assembly protein 1-like 1                                                               | 0               | 2               | 3                | -1.99835            |

## Candidates for positive regulators of normal growth (Fisher's)

| Rank | entrez# | Gene Symbol   | Gene name                                                                              | enriched shRNAs | depleted shRNAs | no change shRNAs | average Fold Change |
|------|---------|---------------|----------------------------------------------------------------------------------------|-----------------|-----------------|------------------|---------------------|
| 2476 | 241452  | Dhrs9         | dehydrogenase/reductase (SDR family) member 9                                          | 0               | 2               | 3                | -1.9981             |
| 2477 | 381936  | LOC381936     | NA                                                                                     | 0               | 2               | 3                | -1.99795            |
| 2478 | 67605   | Akt1s1        | AKT1 substrate 1 (proline-rich)                                                        | 0               | 2               | 2                | -1.9978             |
| 2479 | 23963   | Odz1          | odd Oz/ten-m homolog 1 (Drosophila)                                                    | 0               | 2               | 3                | -1.99717            |
| 2480 | 381203  | Slc22a20      | solute carrier family 22 (organic anion transporter), member 20                        | 0               | 2               | 3                | -1.99704            |
| 2481 | 17999   | Nedd4         | neural precursor cell expressed, developmentally down-regulated 4                      | 0               | 2               | 3                | -1.99694            |
| 2482 | 22402   | Wisp1         | WNT1 inducible signaling pathway protein 1                                             | 0               | 2               | 3                | -1.9956             |
| 2483 | 14588   | Gfra4         | glial cell line derived neurotrophic factor family receptor alpha 4                    | 0               | 2               | 3                | -1.99494            |
| 2484 | 171278  | V1rh21        | vomeronasal 1 receptor 197                                                             | 0               | 2               | 3                | -1.99474            |
| 2485 | 383341  | LOC383341     | ubiquitin A-52 residue ribosomal protein fusion product 1 pseudogene                   | 0               | 2               | 3                | -1.99383            |
| 2486 | 54616   | Extl3         | exostoses (multiple)-like 3                                                            | 0               | 2               | 2                | -1.99344            |
| 2487 | 78779   | 2610039E05Rik | spermatogenesis associated 2-like                                                      | 0               | 2               | 3                | -1.99283            |
| 2488 | 192216  | Tmem47        | transmembrane protein 47                                                               | 0               | 2               | 3                | -1.99235            |
| 2489 | 66541   | Imp11         | IMP1 inner mitochondrial membrane peptidase-like (S. cerevisiae)                       | 0               | 2               | 3                | -1.99165            |
| 2490 | 109019  | 5830411E10Rik | oligonucleotide/oligosaccharide-binding fold containing 2A                             | 0               | 2               | 3                | -1.99143            |
| 2491 | 71241   | Dmrtc2        | doublesex and mab-3 related transcription factor like family C2                        | 0               | 2               | 3                | -1.99136            |
| 2492 | 18554   | Pcsk7         | proprotein convertase subtilisin/kexin type 7                                          | 0               | 2               | 2                | -1.99097            |
| 2493 | 20348   | Sema3c        | sema domain, immunoglobulin domain (Ig), short basic domain, secreted, (semaphorin) 3C | 0               | 2               | 3                | -1.99092            |
| 2494 | 56534   | Hspb3         | heat shock protein 3                                                                   | 0               | 2               | 2                | -1.99005            |
| 2495 | 114671  | 4930444G20Rik | RIKEN cDNA 4930444G20 gene                                                             | 0               | 2               | 3                | -1.98865            |
| 2496 | 13380   | Dkk1          | dickkopf homolog 1 (Xenopus laevis)                                                    | 0               | 2               | 3                | -1.98863            |
| 2497 | 209517  | Taar7b        | trace amine-associated receptor 7B                                                     | 0               | 2               | 2                | -1.98842            |
| 2498 | 74568   | Mkl1          | mixed lineage kinase domain-like                                                       | 0               | 2               | 3                | -1.98838            |
| 2499 | 109314  | A030004J04Rik | proline rich 9                                                                         | 0               | 2               | 3                | -1.98662            |
| 2500 | 15209   | Hesx1         | homeobox gene expressed in ES cells                                                    | 0               | 2               | 3                | -1.98652            |
| 2501 | 77697   | Mmab          | methylmalonic aciduria (cobalamin deficiency) type B homolog (human)                   | 0               | 2               | 3                | -1.98564            |
| 2502 | 242517  | LOC242517     | predicted gene 12597                                                                   | 0               | 2               | 3                | -1.98392            |
| 2503 | 80287   | Apobec3       | apolipoprotein B mRNA editing enzyme, catalytic polypeptide 3                          | 0               | 2               | 2                | -1.98379            |
| 2504 | 14751   | Gpi1          | glucose phosphate isomerase 1                                                          | 0               | 2               | 3                | -1.98232            |
| 2505 | 18792   | Plau          | plasminogen activator, urokinase                                                       | 0               | 2               | 3                | -1.98136            |
| 2506 | 66593   | Diablo        | diablo homolog (Drosophila)                                                            | 0               | 2               | 3                | -1.98084            |
| 2507 | 75533   | Nme5          | non-metastatic cells 5, protein expressed in (nucleoside-diphosphate kinase)           | 0               | 2               | 3                | -1.9803             |
| 2508 | 20612   | Siglec1       | sialic acid binding Ig-like lectin 1, sialoadhesin                                     | 0               | 2               | 3                | -1.97999            |
| 2509 | 228413  | Prrg4         | proline rich Gla (G-carboxyglutamic acid) 4 (transmembrane)                            | 0               | 2               | 3                | -1.97956            |
| 2510 | 217653  | C79407        | MIS18 binding protein 1                                                                | 0               | 2               | 3                | -1.97933            |
| 2511 | 16495   | Kcna7         | potassium voltage-gated channel, shaker-related subfamily, member 7                    | 0               | 2               | 3                | -1.97894            |
| 2512 | 67922   | 2510049I19Rik | family with sequence similarity 32, member A                                           | 0               | 2               | 3                | -1.97836            |

Candidates for positive regulators of normal growth (Fisher's)

| Rank | entrez# | Gene Symbol   | Gene name                                                                                         | enriched shRNAs | depleted shRNAs | no change shRNAs | average Fold Change |
|------|---------|---------------|---------------------------------------------------------------------------------------------------|-----------------|-----------------|------------------|---------------------|
| 2513 | 231050  | Galnt11       | UDP-N-acetyl-alpha-D-galactosamine:polypeptide N-acetylgalactosaminyltransferase 11               | 0               | 2               | 3                | -1.97802            |
| 2514 | 20018   | Rpo1-3        | polymerase (RNA) I polypeptide D                                                                  | 0               | 2               | 3                | -1.97773            |
| 2515 | 105833  | Ccdc65        | coiled-coil domain containing 65                                                                  | 0               | 2               | 2                | -1.9773             |
| 2516 | 211586  | Tfdp2         | transcription factor Dp 2                                                                         | 0               | 2               | 3                | -1.97718            |
| 2517 | 330914  | Grit          | Rho GTPase activating protein 32                                                                  | 0               | 2               | 3                | -1.97686            |
| 2518 | 216961  | Coro6         | coronin 6                                                                                         | 0               | 2               | 3                | -1.97679            |
| 2519 | 21959   | Tnp2          | transition protein 2                                                                              | 0               | 2               | 3                | -1.97612            |
| 2520 | 74100   | Arpp21        | cyclic AMP-regulated phosphoprotein, 21                                                           | 0               | 2               | 7                | -1.97585            |
| 2521 | 72739   | Zfp306        | zinc finger with KRAB and SCAN domains 3                                                          | 0               | 2               | 3                | -1.97524            |
| 2522 | 57376   | Smarce1       | SWI/SNF related, matrix associated, actin dependent regulator of chromatin, subfamily e, member 1 | 0               | 2               | 3                | -1.97432            |
| 2523 | 238673  | Zfp367        | zinc finger protein 367                                                                           | 0               | 2               | 3                | -1.97402            |
| 2524 | 18316   | Olf19         | olfactory receptor 19                                                                             | 0               | 2               | 3                | -1.97389            |
| 2525 | 21908   | Tlx1          | T cell leukemia, homeobox 1                                                                       | 0               | 2               | 3                | -1.97339            |
| 2526 | 68797   | Pdgfrl        | platelet-derived growth factor receptor-like                                                      | 0               | 2               | 3                | -1.96999            |
| 2527 | 226744  | 9630058J23Rik | consortin, connexin sorting protein                                                               | 0               | 2               | 2                | -1.96973            |
| 2528 | 14462   | Gata3         | GATA binding protein 3                                                                            | 0               | 2               | 3                | -1.96886            |
| 2529 | 623215  | LOC623215     | predicted gene 10339                                                                              | 0               | 2               | 3                | -1.96836            |
| 2530 | 56791   | Ube2l6        | ubiquitin-conjugating enzyme E2L 6                                                                | 0               | 2               | 3                | -1.96731            |
| 2531 | 67739   | 4930570C03Rik | solute carrier family 48 (heme transporter), member 1                                             | 0               | 2               | 3                | -1.96729            |
| 2532 | 13496   | Arid3a        | AT rich interactive domain 3A (BRIGHT-like)                                                       | 0               | 2               | 3                | -1.96704            |
| 2533 | 229776  | Cdc14a        | CDC14 cell division cycle 14 homolog A (S. cerevisiae)                                            | 0               | 2               | 3                | -1.96677            |
| 2534 | 70433   | 2610109H07Rik | RIKEN cDNA 2610109H07 gene                                                                        | 0               | 2               | 3                | -1.96663            |
| 2535 | 56473   | Fads2         | fatty acid desaturase 2                                                                           | 0               | 2               | 2                | -1.96648            |
| 2536 | 246317  | Neto1         | neuropilin (NRP) and tolloid (TLL)-like 1                                                         | 0               | 2               | 2                | -1.96567            |
| 2537 | 239408  | Tmem74        | transmembrane protein 74                                                                          | 0               | 2               | 2                | -1.96553            |
| 2538 | 259151  | Olf1037       | olfactory receptor 1037                                                                           | 0               | 2               | 3                | -1.96523            |
| 2539 | 93874   | Pcdhb3        | protocadherin beta 3                                                                              | 0               | 2               | 3                | -1.96401            |
| 2540 | 19225   | Ptgs2         | prostaglandin-endoperoxide synthase 2                                                             | 0               | 2               | 3                | -1.96365            |
| 2541 | 432552  | RP23-273O7.4  | family with sequence similarity 71, member B                                                      | 0               | 2               | 2                | -1.96349            |
| 2542 | 98710   | Rabif         | RAB interacting factor                                                                            | 0               | 2               | 3                | -1.96346            |
| 2543 | 223332  | C130037N17Rik | RAN binding protein 3-like                                                                        | 0               | 2               | 3                | -1.96277            |
| 2544 | 14687   | Gnaz          | guanine nucleotide binding protein, alpha z subunit                                               | 0               | 2               | 3                | -1.96214            |
| 2545 | 24001   | Tiam2         | T cell lymphoma invasion and metastasis 2                                                         | 0               | 2               | 3                | -1.96119            |
| 2546 | 69721   | Nkiras1       | NFKB inhibitor interacting Ras-like protein 1                                                     | 0               | 2               | 2                | -1.96049            |
| 2547 | 171196  | V1rc23        | vomer nasal 1 receptor 22                                                                         | 0               | 2               | 3                | -1.95835            |
| 2548 | 67673   | Tceb2         | transcription elongation factor B (SIII), polypeptide 2                                           | 0               | 2               | 2                | -1.95828            |
| 2549 | 11909   | Atf2          | activating transcription factor 2                                                                 | 0               | 2               | 3                | -1.95747            |



Candidates for positive regulators of normal growth (Fisher's)

| Rank | entrez# | Gene Symbol   | Gene name                                                                            | enriched shRNAs | depleted shRNAs | no change shRNAs | average Fold Change |
|------|---------|---------------|--------------------------------------------------------------------------------------|-----------------|-----------------|------------------|---------------------|
| 2550 | 259053  | Olf362        | olfactory receptor 362                                                               | 0               | 2               | 2                | -1.95743            |
| 2551 | 67507   | 1700019N19Rik | RIKEN cDNA 1700019N19 gene                                                           | 0               | 2               | 2                | -1.95567            |
| 2552 | 252966  | Cables2       | CDK5 and Abl enzyme substrate 2                                                      | 0               | 2               | 2                | -1.95509            |
| 2553 | 338403  | Cndp1         | carnosine dipeptidase 1 (metallopeptidase M20 family)                                | 0               | 2               | 3                | -1.95504            |
| 2554 | 382407  | Gad1-ps       | glutamic acid decarboxylase 1, pseudogene                                            | 0               | 2               | 2                | -1.95459            |
| 2555 | 234788  | Gm587         | solute carrier family 38, member 8                                                   | 0               | 2               | 3                | -1.95432            |
| 2556 | 386445  | Trav7d-3      | NA                                                                                   | 0               | 2               | 3                | -1.95262            |
| 2557 | 11537   | Cfd           | complement factor D (adipsin)                                                        | 0               | 2               | 3                | -1.95231            |
| 2558 | 56809   | Gmeb1         | glucocorticoid modulatory element binding protein 1                                  | 0               | 2               | 3                | -1.95081            |
| 2559 | 268749  | Rnf31         | ring finger protein 31                                                               | 0               | 2               | 3                | -1.94993            |
| 2560 | 109624  | Cald1         | caldesmon 1                                                                          | 0               | 2               | 3                | -1.94932            |
| 2561 | 245839  | Gzmn          | granzyme N                                                                           | 0               | 2               | 3                | -1.9492             |
| 2562 | 71810   | Ranbp3        | RAN binding protein 3                                                                | 0               | 2               | 2                | -1.94913            |
| 2563 | 387340  | Tas2r104      | taste receptor, type 2, member 104                                                   | 0               | 2               | 3                | -1.94623            |
| 2564 | 109857  | Cbr3          | carbonyl reductase 3                                                                 | 0               | 2               | 3                | -1.94621            |
| 2565 | 99982   | Aof2          | lysine (K)-specific demethylase 1A                                                   | 0               | 2               | 3                | -1.94598            |
| 2566 | 72145   | Wdfy3         | WD repeat and FYVE domain containing 3                                               | 0               | 2               | 3                | -1.94574            |
| 2567 | 14864   | Gstm3         | glutathione S-transferase, mu 3                                                      | 0               | 2               | 3                | -1.94399            |
| 2568 | 14943   | Gzmf          | granzyme F                                                                           | 0               | 2               | 3                | -1.94398            |
| 2569 | 16181   | Il1rn         | interleukin 1 receptor antagonist                                                    | 0               | 2               | 3                | -1.94389            |
| 2570 | 21427   | Vps72         | vacuolar protein sorting 72 (yeast)                                                  | 0               | 2               | 3                | -1.94299            |
| 2571 | 276770  | Eif5a         | eukaryotic translation initiation factor 5A                                          | 0               | 2               | 3                | -1.94274            |
| 2572 | 13163   | Daxx          | Fas death domain-associated protein                                                  | 0               | 2               | 3                | -1.94145            |
| 2573 | 116873  | Stim2         | stromal interaction molecule 2                                                       | 0               | 2               | 3                | -1.94104            |
| 2574 | 225875  | Lrfn4         | leucine rich repeat and fibronectin type III domain containing 4                     | 0               | 2               | 2                | -1.94078            |
| 2575 | 56390   | Sssca1        | Sjogren's syndrome/scleroderma autoantigen 1 homolog (human)                         | 0               | 2               | 2                | -1.94072            |
| 2576 | 12492   | Scarb2        | scavenger receptor class B, member 2                                                 | 0               | 2               | 3                | -1.9407             |
| 2577 | 13831   | Epc1          | enhancer of polycomb homolog 1 (Drosophila)                                          | 0               | 2               | 2                | -1.94033            |
| 2578 | 71099   | Tssk4         | testis-specific serine kinase 4                                                      | 0               | 2               | 3                | -1.94032            |
| 2579 | 383619  | Gm1313        | absent in melanoma 2                                                                 | 0               | 2               | 3                | -1.94029            |
| 2580 | 23985   | Slc26a4       | solute carrier family 26, member 4                                                   | 0               | 2               | 3                | -1.94028            |
| 2581 | 22068   | Trpc6         | transient receptor potential cation channel, subfamily C, member 6                   | 0               | 2               | 3                | -1.93937            |
| 2582 | 12627   | Cfc1          | cripto, FRL-1, cryptic family 1                                                      | 0               | 2               | 3                | -1.93932            |
| 2583 | 258475  | Olf889        | olfactory receptor 889                                                               | 0               | 2               | 2                | -1.93931            |
| 2584 | 241197  | Serpib10      | serine (or cysteine) peptidase inhibitor, clade B (ovalbumin), member 10, pseudogene | 0               | 2               | 3                | -1.9386             |
| 2585 | 12424   | Cck           | cholecystokinin                                                                      | 0               | 2               | 3                | -1.93853            |
| 2586 | 19885   | Rorc          | RAR-related orphan receptor gamma                                                    | 0               | 2               | 3                | -1.93839            |

Candidates for positive regulators of normal growth (Fisher's)

| Rank | entrez# | Gene Symbol   | Gene name                                                                                         | enriched shRNAs | depleted shRNAs | no change shRNAs | average Fold Change |
|------|---------|---------------|---------------------------------------------------------------------------------------------------|-----------------|-----------------|------------------|---------------------|
| 2587 | 380698  | Obscn         | obscurin, cytoskeletal calmodulin and titin-interacting RhoGEF                                    | 0               | 2               | 3                | -1.93821            |
| 2588 | 242585  | Slc35d1       | solute carrier family 35 (UDP-glucuronic acid/UDP-N-acetylgalactosamine dual transporter), member | 0               | 2               | 3                | -1.93797            |
| 2589 | 68556   | Uck1          | uridine-cytidine kinase 1-like 1                                                                  | 0               | 2               | 3                | -1.93783            |
| 2590 | 450219  | Gsdm3         | gasdermin A3                                                                                      | 0               | 2               | 3                | -1.9375             |
| 2591 | 218171  | UNK           | NA                                                                                                | 0               | 2               | 3                | -1.93749            |
| 2592 | 18213   | Ntrk3         | neurotrophic tyrosine kinase, receptor, type 3                                                    | 0               | 2               | 3                | -1.93628            |
| 2593 | 215257  | Il1f9         | interleukin 1 family, member 9                                                                    | 0               | 2               | 3                | -1.93599            |
| 2594 | 244234  | 5830411N06Rik | RIKEN cDNA 5830411N06 gene                                                                        | 0               | 2               | 3                | -1.93545            |
| 2595 | 18753   | Prkcd         | protein kinase C, delta                                                                           | 0               | 2               | 3                | -1.93521            |
| 2596 | 54409   | Ramp2         | receptor (calcitonin) activity modifying protein 2                                                | 0               | 2               | 3                | -1.93432            |
| 2597 | 67439   | Xab2          | XPA binding protein 2                                                                             | 0               | 2               | 3                | -1.9343             |
| 2598 | 21968   | Tom1          | target of myb1 homolog (chicken)                                                                  | 0               | 2               | 3                | -1.93418            |
| 2599 | 19281   | Ptprt         | protein tyrosine phosphatase, receptor type, T                                                    | 0               | 2               | 3                | -1.93401            |
| 2600 | 68473   | Mobkl1a       | MOB kinase activator 1B                                                                           | 0               | 2               | 3                | -1.93342            |
| 2601 | 68421   | Lmbrd1        | LMBR1 domain containing 1                                                                         | 0               | 2               | 3                | -1.93302            |
| 2602 | 213945  | Col28a1       | collagen, type XXVIII, alpha 1                                                                    | 0               | 2               | 3                | -1.93295            |
| 2603 | 56696   | Gpr132        | G protein-coupled receptor 132                                                                    | 0               | 2               | 3                | -1.93277            |
| 2604 | 19280   | Ptprs         | protein tyrosine phosphatase, receptor type, S                                                    | 0               | 2               | 3                | -1.93275            |
| 2605 | 66840   | Wdr45l        | Wdr45 like                                                                                        | 0               | 2               | 2                | -1.93264            |
| 2606 | 16211   | Kpnb1         | karyopherin (importin) beta 1                                                                     | 0               | 2               | 3                | -1.93185            |
| 2607 | 192193  | Edem1         | ER degradation enhancer, mannosidase alpha-like 1                                                 | 0               | 2               | 3                | -1.93182            |
| 2608 | 217830  | 9030617O03Rik | RIKEN cDNA 9030617O03 gene                                                                        | 0               | 2               | 3                | -1.93169            |
| 2609 | 239126  | C1qtnf9       | C1q and tumor necrosis factor related protein 9                                                   | 0               | 2               | 3                | -1.93145            |
| 2610 | 435386  | UNK           | NA                                                                                                | 0               | 2               | 3                | -1.93087            |
| 2611 | 15245   | Hhip          | Hedgehog-interacting protein                                                                      | 0               | 2               | 3                | -1.93005            |
| 2612 | 67133   | Gp2           | glycoprotein 2 (zymogen granule membrane)                                                         | 0               | 2               | 3                | -1.9298             |
| 2613 | 20450   | St8sia2       | ST8 alpha-N-acetyl-neuraminide alpha-2,8-sialyltransferase 2                                      | 0               | 2               | 3                | -1.92864            |
| 2614 | 19064   | Ppy           | pancreatic polypeptide                                                                            | 0               | 2               | 3                | -1.92844            |
| 2615 | 17346   | Mknk1         | MAP kinase-interacting serine/threonine kinase 1                                                  | 0               | 2               | 3                | -1.92814            |
| 2616 | 65961   | Crz1          | UTP3, small subunit (SSU) processome component, homolog (S. cerevisiae)                           | 0               | 2               | 3                | -1.92801            |
| 2617 | 12801   | Cnr1          | cannabinoid receptor 1 (brain)                                                                    | 0               | 2               | 3                | -1.92713            |
| 2618 | 240216  | E230025N22    | Riken cDNA E230025N22 gene                                                                        | 0               | 2               | 3                | -1.92712            |
| 2619 | 69024   | Snx15         | sorting nexin 15                                                                                  | 0               | 2               | 2                | -1.92674            |
| 2620 | 19221   | Ptgfrn        | prostaglandin F2 receptor negative regulator                                                      | 0               | 2               | 3                | -1.92594            |
| 2621 | 277898  | 9830102E05Rik | solute carrier family 15, member 5                                                                | 0               | 2               | 3                | -1.92546            |
| 2622 | 12515   | Cd69          | CD69 antigen                                                                                      | 0               | 2               | 3                | -1.92468            |
| 2623 | 66532   | 2210417D09Rik | RAB15 effector protein                                                                            | 0               | 2               | 2                | -1.92454            |

Candidates for positive regulators of normal growth (Fisher's)

| Rank | entrez# | Gene Symbol   | Gene name                                                       | enriched shRNAs | depleted shRNAs | no change shRNAs | average Fold Change |
|------|---------|---------------|-----------------------------------------------------------------|-----------------|-----------------|------------------|---------------------|
| 2624 | 11536   | Admr          | G protein-coupled receptor 182                                  | 0               | 2               | 3                | -1.92434            |
| 2625 | 107652  | Uap1          | UDP-N-acetylglucosamine pyrophosphorylase 1                     | 0               | 2               | 3                | -1.92388            |
| 2626 | 66916   | Ndufb7        | NADH dehydrogenase (ubiquinone) 1 beta subcomplex, 7            | 0               | 2               | 3                | -1.92382            |
| 2627 | 73708   | Dppa3         | developmental pluripotency-associated 3                         | 0               | 2               | 2                | -1.9213             |
| 2628 | 71835   | Lancl2        | LanC (bacterial lantibiotic synthetase component C)-like 2      | 0               | 2               | 2                | -1.92128            |
| 2629 | 74917   | 4930474M22Rik | RIKEN cDNA 4930474M22 gene                                      | 0               | 2               | 2                | -1.92125            |
| 2630 | 20700   | Serpina1a     | serine (or cysteine) peptidase inhibitor, clade A, member 1A    | 0               | 2               | 3                | -1.92068            |
| 2631 | 244646  | Pkd1l3        | polycystic kidney disease 1 like 3                              | 0               | 2               | 3                | -1.92057            |
| 2632 | 12723   | Clcn1         | chloride channel 1                                              | 0               | 2               | 3                | -1.91961            |
| 2633 | 20174   | Ruvbl2        | RuvB-like protein 2                                             | 0               | 2               | 3                | -1.91912            |
| 2634 | 72759   | Tmem135       | transmembrane protein 135                                       | 0               | 2               | 2                | -1.91909            |
| 2635 | 24071   | Synj2bp       | synaptojanin 2 binding protein                                  | 0               | 2               | 3                | -1.91901            |
| 2636 | 171243  | V1rg8         | vomeronasal 1 receptor 83                                       | 0               | 2               | 2                | -1.91836            |
| 2637 | 18506   | Pax4          | paired box gene 4                                               | 0               | 2               | 3                | -1.91796            |
| 2638 | 17433   | Mobp          | myelin-associated oligodendrocytic basic protein                | 0               | 2               | 2                | -1.91788            |
| 2639 | 14161   | Fga           | fibrinogen alpha chain                                          | 0               | 2               | 3                | -1.9175             |
| 2640 | 225825  | Cd226         | CD226 antigen                                                   | 0               | 2               | 3                | -1.91608            |
| 2641 | 105787  | Prkaa1        | protein kinase, AMP-activated, alpha 1 catalytic subunit        | 0               | 2               | 3                | -1.91536            |
| 2642 | 70821   | 4921507P07Rik | RIKEN cDNA 4921507P07 gene                                      | 0               | 2               | 2                | -1.91525            |
| 2643 | 270160  | Rab39         | RAB39, member RAS oncogene family                               | 0               | 2               | 3                | -1.9148             |
| 2644 | 67936   | Wdr55         | WD repeat domain 55                                             | 0               | 2               | 3                | -1.91232            |
| 2645 | 258499  | Olf945        | olfactory receptor 945                                          | 0               | 2               | 3                | -1.91186            |
| 2646 | 69234   | Zfp688        | zinc finger protein 688                                         | 0               | 2               | 3                | -1.91186            |
| 2647 | 170813  | Ms4a3         | membrane-spanning 4-domains, subfamily A, member 3              | 0               | 2               | 2                | -1.91173            |
| 2648 | 110902  | Chrna2        | cholinergic receptor, nicotinic, alpha polypeptide 2 (neuronal) | 0               | 2               | 3                | -1.91148            |
| 2649 | 16508   | Kcnd2         | potassium voltage-gated channel, Shal-related family, member 2  | 0               | 2               | 3                | -1.91122            |
| 2650 | 75901   | Dcp1a         | DCP1 decapping enzyme homolog A (S. cerevisiae)                 | 0               | 2               | 3                | -1.91122            |
| 2651 | 20449   | St8sia1       | ST8 alpha-N-acetyl-neuraminide alpha-2,8-sialyltransferase 1    | 0               | 2               | 3                | -1.91044            |
| 2652 | 231997  | Fkbp14        | FK506 binding protein 14                                        | 0               | 2               | 3                | -1.90996            |
| 2653 | 109077  | Ints5         | integrator complex subunit 5                                    | 0               | 2               | 3                | -1.90988            |
| 2654 | 72962   | Ecgf1         | thymidine phosphorylase                                         | 0               | 2               | 3                | -1.90977            |
| 2655 | 18750   | Prkca         | protein kinase C, alpha                                         | 0               | 2               | 3                | -1.90914            |
| 2656 | 216144  | AJ543404      | vomeronasal 2, receptor 81                                      | 0               | 2               | 3                | -1.90906            |
| 2657 | 234852  | Pcoln3        | charged multivesicular body protein 1A                          | 0               | 2               | 3                | -1.90788            |
| 2658 | 78521   | B230219D22Rik | RIKEN cDNA B230219D22 gene                                      | 0               | 2               | 2                | -1.90755            |
| 2659 | 258930  | Olf808        | olfactory receptor 808                                          | 0               | 2               | 2                | -1.90754            |
| 2660 | 67389   | C1qdc2        | family with sequence similarity 132, member A                   | 0               | 2               | 3                | -1.90753            |

Candidates for positive regulators of normal growth (Fisher's)

| Rank | entrez# | Gene Symbol   | Gene name                                                                                       | enriched shRNAs | depleted shRNAs | no change shRNAs | average Fold Change |
|------|---------|---------------|-------------------------------------------------------------------------------------------------|-----------------|-----------------|------------------|---------------------|
| 2661 | 403395  | Clec3a        | C-type lectin domain family 3, member a                                                         | 0               | 2               | 3                | -1.90733            |
| 2662 | 54196   | Pabpn1        | poly(A) binding protein, nuclear 1                                                              | 0               | 2               | 3                | -1.90727            |
| 2663 | 14704   | Gng3          | guanine nucleotide binding protein (G protein), gamma 3                                         | 0               | 2               | 3                | -1.90606            |
| 2664 | 208595  | MTERF         | predicted gene 9897                                                                             | 0               | 2               | 3                | -1.90572            |
| 2665 | 14581   | Gfi1          | growth factor independent 1                                                                     | 0               | 2               | 3                | -1.90563            |
| 2666 | 258677  | Olf76         | olfactory receptor 76                                                                           | 0               | 2               | 3                | -1.90498            |
| 2667 | 433358  | UNK           | NA                                                                                              | 0               | 2               | 3                | -1.90443            |
| 2668 | 407972  | Gapdh         | NA                                                                                              | 0               | 2               | 3                | -1.90414            |
| 2669 | 13168   | Dbit5         | diazepam binding inhibitor-like 5                                                               | 0               | 2               | 3                | -1.90413            |
| 2670 | 228602  | 4930402H24Rik | RIKEN cDNA 4930402H24 gene                                                                      | 0               | 2               | 2                | -1.90379            |
| 2671 | 20352   | Sema4b        | sema domain, immunoglobulin domain (Ig), transmembrane domain (TM) and short cytoplasmic domain | 0               | 2               | 3                | -1.90374            |
| 2672 | 234847  | Spg7          | spastic paraplegia 7 homolog (human)                                                            | 0               | 2               | 3                | -1.90305            |
| 2673 | 399642  | Ptprh         | NA                                                                                              | 0               | 2               | 3                | -1.90251            |
| 2674 | 110312  | Pmch          | pro-melanin-concentrating hormone                                                               | 0               | 2               | 2                | -1.9025             |
| 2675 | 171263  | V1re10        | vomer nasal 1 receptor 67                                                                       | 0               | 2               | 2                | -1.90243            |
| 2676 | 94176   | Dock2         | dedicator of cyto-kinesis 2                                                                     | 0               | 2               | 3                | -1.9024             |
| 2677 | 233079  | Ffar2         | free fatty acid receptor 2                                                                      | 0               | 2               | 3                | -1.90206            |
| 2678 | 56189   | Prodh2        | proline dehydrogenase (oxidase) 2                                                               | 0               | 2               | 3                | -1.90198            |
| 2679 | 12469   | Cct8          | chaperonin containing Tcp1, subunit 8 (theta)                                                   | 0               | 2               | 3                | -1.90194            |
| 2680 | 22057   | Tob1          | transducer of ErbB-2.1                                                                          | 0               | 2               | 3                | -1.90193            |
| 2681 | 30935   | Tor3a         | torsin family 3, member A                                                                       | 0               | 2               | 3                | -1.90066            |
| 2682 | 89867   | Lztr2         | SEC16 homolog B (S. cerevisiae)                                                                 | 0               | 2               | 2                | -1.90003            |
| 2683 | 113858  | V1rc1         | vomer nasal 1 receptor 10                                                                       | 0               | 2               | 3                | -1.89985            |
| 2684 | 23938   | Map2k5        | mitogen-activated protein kinase 5                                                              | 0               | 2               | 3                | -1.89918            |
| 2685 | 68095   | Ociad1        | OCIA domain containing 1                                                                        | 0               | 2               | 3                | -1.89916            |
| 2686 | 269152  | BC056349      | kinesin family member 26B                                                                       | 0               | 2               | 3                | -1.89872            |
| 2687 | 386467  | UNK           | NA                                                                                              | 0               | 2               | 3                | -1.89851            |
| 2688 | 56389   | Stx5a         | syntaxin 5A                                                                                     | 0               | 2               | 3                | -1.89824            |
| 2689 | 66306   | 2810012G03Rik | family with sequence similarity 53, member C                                                    | 0               | 2               | 3                | -1.89796            |
| 2690 | 16581   | Kifc2         | kinesin family member C2                                                                        | 0               | 2               | 3                | -1.89722            |
| 2691 | 213438  | A630033H20Rik | RIKEN cDNA A630033H20 gene                                                                      | 0               | 2               | 3                | -1.89706            |
| 2692 | 23892   | Grem1         | gremlin 1                                                                                       | 0               | 2               | 3                | -1.89683            |
| 2693 | 66078   | Tsen34        | tRNA splicing endonuclease 34 homolog (S. cerevisiae)                                           | 0               | 2               | 3                | -1.89635            |
| 2694 | 108101  | BC032204      | fermitin family homolog 3 (Drosophila)                                                          | 0               | 2               | 3                | -1.89625            |
| 2695 | 28109   | D10Wsu102e    | DNA segment, Chr 10, Wayne State University 102, expressed                                      | 0               | 2               | 2                | -1.89598            |
| 2696 | 19108   | Prkx          | protein kinase, X-linked                                                                        | 0               | 2               | 3                | -1.89496            |
| 2697 | 21949   | Tnfsf8        | tumor necrosis factor (ligand) superfamily, member 8                                            | 0               | 2               | 3                | -1.89456            |

Candidates for positive regulators of normal growth (Fisher's)

| Rank | entrez# | Gene Symbol   | Gene name                                                                                           | enriched shRNAs | depleted shRNAs | no change shRNAs | average Fold Change |
|------|---------|---------------|-----------------------------------------------------------------------------------------------------|-----------------|-----------------|------------------|---------------------|
| 2698 | 258404  | Olf1080       | olfactory receptor 1080                                                                             | 0               | 2               | 2                | -1.89417            |
| 2699 | 53414   | Bysl          | bystin-like                                                                                         | 0               | 2               | 3                | -1.89395            |
| 2700 | 319615  | 6330416L07Rik | zinc finger protein 944                                                                             | 0               | 2               | 3                | -1.89345            |
| 2701 | 15968   | Ifna5         | interferon alpha 5                                                                                  | 0               | 2               | 3                | -1.89344            |
| 2702 | 94186   | Strn3         | striatin, calmodulin binding protein 3                                                              | 0               | 2               | 3                | -1.89197            |
| 2703 | 382814  | UNK           | NA                                                                                                  | 0               | 2               | 3                | -1.89189            |
| 2704 | 107951  | Cdk9          | cyclin-dependent kinase 9 (CDC2-related kinase)                                                     | 0               | 2               | 3                | -1.8918             |
| 2705 | 16560   | Kif1a         | kinesin family member 1A                                                                            | 0               | 2               | 3                | -1.89093            |
| 2706 | 18198   | Musk          | muscle, skeletal, receptor tyrosine kinase                                                          | 0               | 2               | 3                | -1.89024            |
| 2707 | 21406   | Tcf12         | transcription factor 12                                                                             | 0               | 2               | 3                | -1.89021            |
| 2708 | 270198  | Pfkfb4        | 6-phosphofructo-2-kinase/fructose-2,6-biphosphatase 4                                               | 0               | 2               | 3                | -1.88984            |
| 2709 | 244484  | Wdr17         | WD repeat domain 17                                                                                 | 0               | 2               | 3                | -1.88853            |
| 2710 | 52690   | Setd3         | SET domain containing 3                                                                             | 0               | 2               | 2                | -1.88812            |
| 2711 | 76425   | 2310003C23Rik | RIKEN cDNA 2310003C23 gene                                                                          | 0               | 2               | 3                | -1.88787            |
| 2712 | 270328  | 9930109F21Rik | gasdermin C3                                                                                        | 0               | 2               | 3                | -1.88743            |
| 2713 | 56208   | Becn1         | beclin 1, autophagy related                                                                         | 0               | 2               | 3                | -1.88676            |
| 2714 | 13074   | Cyp17a1       | cytochrome P450, family 17, subfamily a, polypeptide 1                                              | 0               | 2               | 3                | -1.88651            |
| 2715 | 55981   | Pigb          | phosphatidylinositol glycan anchor biosynthesis, class B                                            | 0               | 2               | 3                | -1.88632            |
| 2716 | 66180   | 1110036O03Rik | leprecan-like 4                                                                                     | 0               | 2               | 3                | -1.8863             |
| 2717 | 107605  | Rdh1          | retinol dehydrogenase 1 (all trans)                                                                 | 0               | 2               | 3                | -1.88628            |
| 2718 | 69700   | Col22a1       | collagen, type XXII, alpha 1                                                                        | 0               | 2               | 3                | -1.88495            |
| 2719 | 320209  | Ddx11         | DEAD/H (Asp-Glu-Ala-Asp/His) box polypeptide 11 (CHL1-like helicase homolog, <i>S. cerevisiae</i> ) | 0               | 2               | 3                | -1.88486            |
| 2720 | 55925   | Syt8          | synaptotagmin VIII                                                                                  | 0               | 2               | 3                | -1.8847             |
| 2721 | 55983   | Pdzrn3        | PDZ domain containing RING finger 3                                                                 | 0               | 2               | 3                | -1.88469            |
| 2722 | 17919   | Myo5b         | myosin VB                                                                                           | 0               | 2               | 3                | -1.88466            |
| 2723 | 73178   | Wasl          | Wiskott-Aldrich syndrome-like (human)                                                               | 0               | 2               | 3                | -1.88391            |
| 2724 | 21672   | Prdx2         | peroxiredoxin 2                                                                                     | 0               | 2               | 2                | -1.88322            |
| 2725 | 258994  | Olf204        | olfactory receptor 204                                                                              | 0               | 2               | 3                | -1.88311            |
| 2726 | 67414   | Mfn1          | mitofusin 1                                                                                         | 0               | 2               | 3                | -1.88242            |
| 2727 | 18504   | Pax2          | paired box gene 2                                                                                   | 0               | 2               | 3                | -1.88215            |
| 2728 | 17110   | Lzp-s         | lysozyme 1                                                                                          | 0               | 2               | 3                | -1.88192            |
| 2729 | 75320   | Etnk1         | ethanolamine kinase 1                                                                               | 0               | 2               | 3                | -1.88165            |
| 2730 | 30877   | Gnl3          | guanine nucleotide binding protein-like 3 (nucleolar)                                               | 0               | 2               | 3                | -1.8811             |
| 2731 | 110794  | Cebpe         | CCAAT/enhancer binding protein (C/EBP), epsilon                                                     | 0               | 2               | 3                | -1.88109            |
| 2732 | 107993  | Bfsp2         | beaded filament structural protein 2, phakinin                                                      | 0               | 2               | 3                | -1.88101            |
| 2733 | 68172   | 4930517K11Rik | ribosomal protein L39-like                                                                          | 0               | 2               | 3                | -1.8804             |
| 2734 | 17250   | Abcc1         | ATP-binding cassette, sub-family C (CFTR/MRP), member 1                                             | 0               | 2               | 3                | -1.87898            |

Candidates for positive regulators of normal growth (Fisher's)

| Rank | entrez# | Gene Symbol   | Gene name                                                                                      | enriched shRNAs | depleted shRNAs | no change shRNAs | average Fold Change |
|------|---------|---------------|------------------------------------------------------------------------------------------------|-----------------|-----------------|------------------|---------------------|
| 2735 | 57439   | 1300007B12Rik | transmembrane protein 183A                                                                     | 0               | 2               | 2                | -1.87892            |
| 2736 | 18028   | Nfib          | nuclear factor I/B                                                                             | 0               | 2               | 3                | -1.87871            |
| 2737 | 320379  | D630028G08Rik | RIKEN cDNA D630028G08 gene                                                                     | 0               | 2               | 3                | -1.87871            |
| 2738 | 503844  | Ang5          | angiogenin, ribonuclease A family, member 5                                                    | 0               | 2               | 3                | -1.87858            |
| 2739 | 271127  | Adamts16      | a disintegrin-like and metallopeptidase (reprolysin type) with thrombospondin type 1 motif, 16 | 0               | 2               | 3                | -1.87841            |
| 2740 | 18181   | Nrf1          | nuclear respiratory factor 1                                                                   | 0               | 2               | 3                | -1.87841            |
| 2741 | 432981  | Gm5474        | predicted gene 5474                                                                            | 0               | 2               | 3                | -1.8767             |
| 2742 | 16569   | Kif3b         | kinesin family member 3B                                                                       | 0               | 2               | 3                | -1.87657            |
| 2743 | 217310  | C630004H02Rik | RIKEN cDNA C630004H02 gene                                                                     | 0               | 2               | 3                | -1.87641            |
| 2744 | 216527  | Ccm2          | cerebral cavernous malformation 2 homolog (human)                                              | 0               | 2               | 3                | -1.87636            |
| 2745 | 19207   | Ptch2         | patched homolog 2                                                                              | 0               | 2               | 3                | -1.87608            |
| 2746 | 107885  | Mthfs         | 5, 10-methenyltetrahydrofolate synthetase                                                      | 0               | 2               | 3                | -1.87608            |
| 2747 | 19023   | Ppef2         | protein phosphatase, EF hand calcium-binding domain 2                                          | 0               | 2               | 3                | -1.87602            |
| 2748 | 19354   | Rac2          | RAS-related C3 botulinum substrate 2                                                           | 0               | 2               | 3                | -1.87589            |
| 2749 | 435791  | LOC435791     | predicted gene 13271                                                                           | 0               | 2               | 3                | -1.8745             |
| 2750 | 22194   | Ube2e1        | ubiquitin-conjugating enzyme E2E 1, UBC4/5 homolog (yeast)                                     | 0               | 2               | 3                | -1.87428            |
| 2751 | 69504   | 2310001H12Rik | zinc finger protein 932                                                                        | 0               | 2               | 3                | -1.87377            |
| 2752 | 12918   | Crh           | corticotropin releasing hormone                                                                | 0               | 2               | 1                | -1.87351            |
| 2753 | 109905  | Rap1a         | RAS-related protein-1a                                                                         | 0               | 2               | 3                | -1.87325            |
| 2754 | 71756   | Cpn2          | carboxypeptidase N, polypeptide 2                                                              | 0               | 2               | 3                | -1.8732             |
| 2755 | 228356  | 1110051M20Rik | RIKEN cDNA 1110051M20 gene                                                                     | 0               | 2               | 2                | -1.87236            |
| 2756 | 232408  | Klrb1f        | killer cell lectin-like receptor subfamily B member 1F                                         | 0               | 2               | 3                | -1.87164            |
| 2757 | 76477   | Pcolce2       | procollagen C-endopeptidase enhancer 2                                                         | 0               | 2               | 3                | -1.87145            |
| 2758 | 69034   | 4930579G22Rik | RIKEN cDNA 4930579G22 gene                                                                     | 0               | 2               | 2                | -1.87117            |
| 2759 | 20924   | Supt5h        | suppressor of Ty 5 homolog (S. cerevisiae)                                                     | 0               | 2               | 3                | -1.87095            |
| 2760 | 19051   | Gsbs          | protein phosphatase 1, regulatory subunit 17                                                   | 0               | 2               | 3                | -1.8706             |
| 2761 | 66083   | 0610039J04Rik | SET domain containing 6                                                                        | 0               | 2               | 3                | -1.87059            |
| 2762 | 66763   | 4933425L06Rik | RIKEN cDNA 4933425L06 gene                                                                     | 0               | 2               | 3                | -1.87049            |
| 2763 | 99899   | Ifi44         | interferon-induced protein 44                                                                  | 0               | 2               | 3                | -1.87042            |
| 2764 | 16069   | Igj           | immunoglobulin joining chain                                                                   | 0               | 2               | 3                | -1.86974            |
| 2765 | 21337   | Tacr2         | tachykinin receptor 2                                                                          | 0               | 2               | 3                | -1.86909            |
| 2766 | 223664  | Lrrc14        | leucine rich repeat containing 14                                                              | 0               | 2               | 3                | -1.86893            |
| 2767 | 56494   | Gosr2         | golgi SNAP receptor complex member 2                                                           | 0               | 2               | 3                | -1.8688             |
| 2768 | 57252   | Tas2r105      | taste receptor, type 2, member 105                                                             | 0               | 2               | 3                | -1.86847            |
| 2769 | 75578   | 2310009E04Rik | FGGY carbohydrate kinase domain containing                                                     | 0               | 2               | 3                | -1.86842            |
| 2770 | 381751  | UNK           | NA                                                                                             | 0               | 2               | 3                | -1.86809            |
| 2771 | 78912   | Sp2           | Sp2 transcription factor                                                                       | 0               | 2               | 3                | -1.86768            |

Candidates for positive regulators of normal growth (Fisher's)

| Rank | entrez# | Gene Symbol   | Gene name                                                                                        | enriched shRNAs | depleted shRNAs | no change shRNAs | average Fold Change |
|------|---------|---------------|--------------------------------------------------------------------------------------------------|-----------------|-----------------|------------------|---------------------|
| 2772 | 13495   | Drg2          | developmentally regulated GTP binding protein 2                                                  | 0               | 2               | 3                | -1.86707            |
| 2773 | 66902   | Mtap          | methylthioadenosine phosphorylase                                                                | 0               | 2               | 3                | -1.86665            |
| 2774 | 94353   | Hmgn3         | high mobility group nucleosomal binding domain 3                                                 | 0               | 2               | 3                | -1.86639            |
| 2775 | 15398   | Hoxa13        | homeobox A13                                                                                     | 0               | 2               | 3                | -1.86608            |
| 2776 | 66789   | Alg14         | asparagine-linked glycosylation 14 homolog (yeast)                                               | 0               | 2               | 3                | -1.86603            |
| 2777 | 113861  | V1rc4         | vomeronasal 1 receptor, pseudogene 8                                                             | 0               | 2               | 3                | -1.86572            |
| 2778 | 226830  | Smyd2         | SET and MYND domain containing 2                                                                 | 0               | 2               | 3                | -1.86552            |
| 2779 | 70661   | BC033915      | SIK family kinase 3                                                                              | 0               | 2               | 3                | -1.86547            |
| 2780 | 259114  | OlfR570       | olfactory receptor 570                                                                           | 0               | 2               | 2                | -1.86547            |
| 2781 | 110948  | Hlcs          | holocarboxylase synthetase (biotin- [propionyl-Coenzyme A-carboxylase (ATP-hydrolysing)] ligase) | 0               | 2               | 3                | -1.8652             |
| 2782 | 24012   | Rgs7          | regulator of G protein signaling 7                                                               | 0               | 2               | 3                | -1.86484            |
| 2783 | 228769  | Psmf1         | proteasome (prosome, macropain) inhibitor subunit 1                                              | 0               | 2               | 3                | -1.86453            |
| 2784 | 235047  | BB114266      | zinc finger protein 809                                                                          | 0               | 2               | 2                | -1.86428            |
| 2785 | 26371   | Wdr39         | cytosolic iron-sulfur protein assembly 1 homolog (S. cerevisiae)                                 | 0               | 2               | 3                | -1.86336            |
| 2786 | 211914  | Ddef2         | ArfGAP with SH3 domain, ankyrin repeat and PH domain 2                                           | 0               | 2               | 3                | -1.86318            |
| 2787 | 16451   | Jak1          | Janus kinase 1                                                                                   | 0               | 2               | 3                | -1.86308            |
| 2788 | 114716  | Spred2        | sprouty-related, EVH1 domain containing 2                                                        | 0               | 2               | 3                | -1.86298            |
| 2789 | 11614   | Nr0b1         | nuclear receptor subfamily 0, group B, member 1                                                  | 0               | 2               | 3                | -1.86243            |
| 2790 | 56844   | Tssc4         | tumor-suppressing subchromosomal transferable fragment 4                                         | 0               | 2               | 3                | -1.86204            |
| 2791 | 433915  | UNK           | NA                                                                                               | 0               | 2               | 2                | -1.8616             |
| 2792 | 68260   | Trmt12        | tRNA methyltransferase 12 homolog (S. cerevisiae)                                                | 0               | 2               | 3                | -1.8614             |
| 2793 | 71393   | Kctd6         | potassium channel tetramerisation domain containing 6                                            | 0               | 2               | 3                | -1.86126            |
| 2794 | 13714   | Elk4          | ELK4, member of ETS oncogene family                                                              | 0               | 2               | 3                | -1.86091            |
| 2795 | 13712   | Elk1          | ELK1, member of ETS oncogene family                                                              | 0               | 2               | 3                | -1.86076            |
| 2796 | 232889  | Pla2g4c       | phospholipase A2, group IVC (cytosolic, calcium-independent)                                     | 0               | 2               | 3                | -1.8607             |
| 2797 | 66155   | Ufc1          | ubiquitin-fold modifier conjugating enzyme 1                                                     | 0               | 2               | 2                | -1.8596             |
| 2798 | 99738   | Kcnc4         | potassium voltage gated channel, Shaw-related subfamily, member 4                                | 0               | 2               | 3                | -1.85942            |
| 2799 | 66841   | Etfdh         | electron transferring flavoprotein, dehydrogenase                                                | 0               | 2               | 3                | -1.85935            |
| 2800 | 74760   | Rab3il1       | RAB3A interacting protein (rabin3)-like 1                                                        | 0               | 2               | 3                | -1.85897            |
| 2801 | 385528  | UNK           | NA                                                                                               | 0               | 2               | 3                | -1.85892            |
| 2802 | 27056   | Irf5          | interferon regulatory factor 5                                                                   | 0               | 2               | 3                | -1.85828            |
| 2803 | 69357   | 1700003E24Rik | cDNA sequence BC061195                                                                           | 0               | 2               | 2                | -1.85809            |
| 2804 | 242574  | C130073F10Rik | RIKEN cDNA C130073F10 gene                                                                       | 0               | 2               | 2                | -1.85806            |
| 2805 | 78558   | Htra3         | HtrA serine peptidase 3                                                                          | 0               | 2               | 3                | -1.85711            |
| 2806 | 76829   | Dok5          | docking protein 5                                                                                | 0               | 2               | 2                | -1.85689            |
| 2807 | 211347  | Pank3         | pantothenate kinase 3                                                                            | 0               | 2               | 3                | -1.85649            |
| 2808 | 58238   | A830059I20Rik | family with sequence similarity 181, member B                                                    | 0               | 2               | 2                | -1.85633            |

Candidates for positive regulators of normal growth (Fisher's)

| Rank | entrez# | Gene Symbol | Gene name                                              | enriched shRNAs | depleted shRNAs | no change shRNAs | average Fold Change |
|------|---------|-------------|--------------------------------------------------------|-----------------|-----------------|------------------|---------------------|
| 2809 | 18260   | Ocln        | occludin                                               | 0               | 2               | 3                | -1.85598            |
| 2810 | 22654   | Zfp13       | zinc finger protein 13                                 | 0               | 2               | 3                | -1.85565            |
| 2811 | 140792  | Colec12     | collectin sub-family member 12                         | 0               | 2               | 3                | -1.85529            |
| 2812 | 432545  | UNK         | NA                                                     | 0               | 2               | 3                | -1.8547             |
| 2813 | 94062   | Mrp13       | mitochondrial ribosomal protein L3                     | 0               | 2               | 3                | -1.85358            |
| 2814 | 333452  | LOC333452   | predicted gene 5132                                    | 0               | 2               | 3                | -1.85206            |
| 2815 | 66642   | Ctnnb1      | catenin, beta like 1                                   | 0               | 2               | 3                | -1.85026            |
| 2816 | 171190  | V1rc17      | vomeronasal 1 receptor 26                              | 0               | 2               | 3                | -1.85023            |
| 2817 | 268783  | Mtmr12      | myotubularin related protein 12                        | 0               | 2               | 3                | -1.85016            |
| 2818 | 66454   | Nmnat1      | nicotinamide nucleotide adenylyltransferase 1          | 0               | 2               | 3                | -1.84996            |
| 2819 | 83395   | Sp6         | trans-acting transcription factor 6                    | 0               | 2               | 3                | -1.8491             |
| 2820 | 21898   | Tlr4        | toll-like receptor 4                                   | 0               | 2               | 3                | -1.84895            |
| 2821 | 50909   | C1r         | complement component 1, r subcomponent A               | 0               | 2               | 3                | -1.84884            |
| 2822 | 67000   | Pripi       | prolactin family 3, subfamily a, member 1              | 0               | 2               | 3                | -1.84882            |
| 2823 | 22644   | Rnf103      | ring finger protein 103                                | 0               | 2               | 2                | -1.84724            |
| 2824 | 14309   | Fshr        | follicle stimulating hormone receptor                  | 0               | 2               | 3                | -1.84722            |
| 2825 | 21769   | Zfand3      | zinc finger, AN1-type domain 3                         | 0               | 2               | 3                | -1.84716            |
| 2826 | 235505  | Cd109       | CD109 antigen                                          | 0               | 2               | 3                | -1.84699            |
| 2827 | 408190  | Wfdc13      | WAP four-disulfide core domain 13                      | 0               | 2               | 2                | -1.84692            |
| 2828 | 66881   | Pcyox1      | prenylcysteine oxidase 1                               | 0               | 2               | 3                | -1.84675            |
| 2829 | 20422   | Shfm1       | split hand/foot malformation (ectrodactyly) type 1     | 0               | 2               | 2                | -1.84673            |
| 2830 | 14381   | G6pdx       | glucose-6-phosphate dehydrogenase X-linked             | 0               | 2               | 3                | -1.8464             |
| 2831 | 68549   | Sgol2       | shugoshin-like 2 ( <i>S. pombe</i> )                   | 0               | 2               | 3                | -1.84614            |
| 2832 | 234911  | Mmp27       | matrix metalloproteinase 27                            | 0               | 2               | 3                | -1.8439             |
| 2833 | 68705   | Gtf2f2      | general transcription factor IIF, polypeptide 2        | 0               | 2               | 3                | -1.84356            |
| 2834 | 11876   | Artn        | artemin                                                | 0               | 2               | 3                | -1.84249            |
| 2835 | 98267   | Stk17b      | serine/threonine kinase 17b (apoptosis-inducing)       | 0               | 2               | 3                | -1.84184            |
| 2836 | 21934   | Tnfrsf11a   | tumor necrosis factor receptor superfamily, member 11a | 0               | 2               | 3                | -1.84181            |
| 2837 | 258592  | Olfir697    | olfactory receptor 697                                 | 0               | 2               | 3                | -1.84179            |
| 2838 | 22323   | Vasp        | vasodilator-stimulated phosphoprotein                  | 0               | 2               | 3                | -1.84103            |
| 2839 | 238803  | Zfp366      | zinc finger protein 366                                | 0               | 2               | 2                | -1.84058            |
| 2840 | 26400   | Map2k7      | mitogen-activated protein kinase kinase 7              | 0               | 2               | 3                | -1.84007            |
| 2841 | 68603   | Pmvk        | phosphomevalonate kinase                               | 0               | 2               | 3                | -1.84006            |
| 2842 | 19120   | Prm3        | protamine 3                                            | 0               | 2               | 3                | -1.83973            |
| 2843 | 93882   | Pcdhb11     | protocadherin beta 11                                  | 0               | 2               | 3                | -1.83915            |
| 2844 | 384009  | Glpir2      | GLI pathogenesis-related 2                             | 0               | 2               | 3                | -1.83893            |
| 2845 | 381413  | Gpr176      | G protein-coupled receptor 176                         | 0               | 2               | 3                | -1.83868            |



Candidates for positive regulators of normal growth (Fisher's)

| Rank | entrez# | Gene Symbol   | Gene name                                                                        | enriched shRNAs | depleted shRNAs | no change shRNAs | average Fold Change |
|------|---------|---------------|----------------------------------------------------------------------------------|-----------------|-----------------|------------------|---------------------|
| 2846 | 14311   | Cidec         | cell death-inducing DFFA-like effector c                                         | 0               | 2               | 2                | -1.83834            |
| 2847 | 108899  | 2700081O15Rik | RIKEN cDNA 2700081O15 gene                                                       | 0               | 2               | 2                | -1.83769            |
| 2848 | 117590  | Asb10         | ankyrin repeat and SOCS box-containing 10                                        | 0               | 2               | 3                | -1.83658            |
| 2849 | 30959   | Ddx25         | DEAD (Asp-Glu-Ala-Asp) box polypeptide 25                                        | 0               | 2               | 3                | -1.83637            |
| 2850 | 224674  | Slc37a1       | solute carrier family 37 (glycerol-3-phosphate transporter), member 1            | 0               | 2               | 3                | -1.83625            |
| 2851 | 12308   | Calb2         | calbindin 2                                                                      | 0               | 2               | 3                | -1.83594            |
| 2852 | 74018   | Als2          | amyotrophic lateral sclerosis 2 (juvenile) homolog (human)                       | 0               | 2               | 3                | -1.83574            |
| 2853 | 19200   | Pstpip1       | proline-serine-threonine phosphatase-interacting protein 1                       | 0               | 2               | 3                | -1.83545            |
| 2854 | 67229   | Prpf18        | PRP18 pre-mRNA processing factor 18 homolog (yeast)                              | 0               | 2               | 3                | -1.83521            |
| 2855 | 16848   | Lfng          | LFNG O-fucosylpeptide 3-beta-N-acetylglucosaminyltransferase                     | 0               | 2               | 3                | -1.83513            |
| 2856 | 76383   | 1700012L04Rik | RIKEN cDNA 1700012L04 gene                                                       | 0               | 2               | 1                | -1.83513            |
| 2857 | 207495  | Baiap2l2      | BAI1-associated protein 2-like 2                                                 | 0               | 2               | 2                | -1.83466            |
| 2858 | 238257  | Tmem30b       | transmembrane protein 30B                                                        | 0               | 2               | 3                | -1.83306            |
| 2859 | 71869   | Serpinh12     | serine (or cysteine) peptidase inhibitor, clade B (ovalbumin), member 12         | 0               | 2               | 3                | -1.83285            |
| 2860 | 83961   | Nrg4          | neuregulin 4                                                                     | 0               | 2               | 3                | -1.83225            |
| 2861 | 11803   | Aplp1         | amyloid beta (A4) precursor-like protein 1                                       | 0               | 2               | 3                | -1.83147            |
| 2862 | 17220   | Mcm7          | minichromosome maintenance deficient 7 ( <i>S. cerevisiae</i> )                  | 0               | 2               | 3                | -1.83059            |
| 2863 | 71833   | Wdr68         | DDB1 and CUL4 associated factor 7                                                | 0               | 2               | 3                | -1.8304             |
| 2864 | 67333   | Stk35         | serine/threonine kinase 35                                                       | 0               | 2               | 3                | -1.83025            |
| 2865 | 243277  | Gpr133        | G protein-coupled receptor 133                                                   | 0               | 2               | 2                | -1.82971            |
| 2866 | 54683   | Prdx5         | peroxiredoxin 5                                                                  | 0               | 2               | 3                | -1.82961            |
| 2867 | 71425   | 5430413K10Rik | BPI fold containing family B, member 9A                                          | 0               | 2               | 3                | -1.82898            |
| 2868 | 102093  | Phkb          | phosphorylase kinase beta                                                        | 0               | 2               | 3                | -1.82876            |
| 2869 | 436127  | UNK           | NA                                                                               | 0               | 2               | 3                | -1.82873            |
| 2870 | 53333   | Tomm40        | translocase of outer mitochondrial membrane 40 homolog (yeast)                   | 0               | 2               | 2                | -1.82843            |
| 2871 | 14797   | Aes           | amino-terminal enhancer of split                                                 | 0               | 2               | 3                | -1.82841            |
| 2872 | 245109  | Gm397         | zinc finger and SCAN domain containing 4C                                        | 0               | 2               | 3                | -1.82837            |
| 2873 | 110279  | Bcr           | breakpoint cluster region                                                        | 0               | 2               | 3                | -1.82812            |
| 2874 | 228858  | Gdap1l1       | ganglioside-induced differentiation-associated protein 1-like 1                  | 0               | 2               | 2                | -1.82708            |
| 2875 | 20355   | Sema4f        | sema domain, immunoglobulin domain (Ig), TM domain, and short cytoplasmic domain | 0               | 2               | 2                | -1.82692            |
| 2876 | 19172   | Psbm4         | proteasome (prosome, macropain) subunit, beta type 4                             | 0               | 2               | 3                | -1.82666            |
| 2877 | 67338   | Rffl          | ring finger and FYVE like domain containing protein                              | 0               | 2               | 3                | -1.82642            |
| 2878 | 50905   | Il17rb        | interleukin 17 receptor B                                                        | 0               | 2               | 3                | -1.8264             |
| 2879 | 207278  | Fchsd2        | FCH and double SH3 domains 2                                                     | 0               | 2               | 2                | -1.8262             |
| 2880 | 60345   | Nrip2         | nuclear receptor interacting protein 2                                           | 0               | 2               | 3                | -1.82584            |
| 2881 | 20589   | Ighmbp2       | immunoglobulin mu binding protein 2                                              | 0               | 2               | 3                | -1.82583            |
| 2882 | 328264  | A030007L22    | NA                                                                               | 0               | 2               | 3                | -1.82563            |

Candidates for positive regulators of normal growth (Fisher's)

| Rank | entrez# | Gene Symbol   | Gene name                                                                      | enriched shRNAs | depleted shRNAs | no change shRNAs | average Fold Change |
|------|---------|---------------|--------------------------------------------------------------------------------|-----------------|-----------------|------------------|---------------------|
| 2883 | 66194   | Pycl1         | pyrroline-5-carboxylate reductase-like                                         | 0               | 2               | 3                | -1.82539            |
| 2884 | 76797   | 2410137M14Rik | RIKEN cDNA 2410137M14 gene                                                     | 0               | 2               | 3                | -1.82512            |
| 2885 | 101142  | Itfg2         | integrin alpha FG-GAP repeat containing 2                                      | 0               | 2               | 3                | -1.82487            |
| 2886 | 72284   | Oraov1        | oral cancer overexpressed 1                                                    | 0               | 2               | 2                | -1.82452            |
| 2887 | 26950   | Vsnl1         | visinin-like 1                                                                 | 0               | 2               | 3                | -1.82354            |
| 2888 | 67503   | 1700001G17Rik | RIKEN cDNA 1700001G17 gene                                                     | 0               | 2               | 2                | -1.82197            |
| 2889 | 74648   | S100pbp       | S100P binding protein                                                          | 0               | 2               | 2                | -1.82054            |
| 2890 | 23950   | Dnajb6        | DnaJ (Hsp40) homolog, subfamily B, member 6                                    | 0               | 2               | 3                | -1.82046            |
| 2891 | 226419  | Dyrk3         | dual-specificity tyrosine-(Y)-phosphorylation regulated kinase 3               | 0               | 2               | 3                | -1.82031            |
| 2892 | 97387   | Strn4         | striatin, calmodulin binding protein 4                                         | 0               | 2               | 3                | -1.82005            |
| 2893 | 27388   | Ptdss2        | phosphatidylserine synthase 2                                                  | 0               | 2               | 3                | -1.8192             |
| 2894 | 79233   | Zfp319        | zinc finger protein 319                                                        | 0               | 2               | 3                | -1.8187             |
| 2895 | 19338   | Rab33b        | RAB33B, member of RAS oncogene family                                          | 0               | 2               | 3                | -1.81835            |
| 2896 | 259105  | Olfrr549      | olfactory receptor 549                                                         | 0               | 2               | 3                | -1.81822            |
| 2897 | 73608   | Marveld3      | MARVEL (membrane-associating) domain containing 3                              | 0               | 2               | 3                | -1.81814            |
| 2898 | 18478   | Pah           | phenylalanine hydroxylase                                                      | 0               | 2               | 3                | -1.81708            |
| 2899 | 404285  | V1rd11        | vomeronasal 1 receptor 64                                                      | 0               | 2               | 2                | -1.8169             |
| 2900 | 74776   | Ppa2          | pyrophosphatase (inorganic) 2                                                  | 0               | 2               | 3                | -1.8164             |
| 2901 | 18046   | Nfyc          | nuclear transcription factor-Y gamma                                           | 0               | 2               | 3                | -1.81572            |
| 2902 | 209513  | Taar4         | trace amine-associated receptor 4                                              | 0               | 2               | 3                | -1.81566            |
| 2903 | 68673   | 1110033F04Rik | keratin associated protein 4-2                                                 | 0               | 2               | 3                | -1.81508            |
| 2904 | 407243  | AI840826      | transmembrane protein 189                                                      | 0               | 2               | 3                | -1.81456            |
| 2905 | 320981  | Enpp6         | ectonucleotide pyrophosphatase/phosphodiesterase 6                             | 0               | 2               | 3                | -1.81415            |
| 2906 | 225888  | Suv420h1      | suppressor of variegation 4-20 homolog 1 (Drosophila)                          | 0               | 2               | 3                | -1.81392            |
| 2907 | 68653   | Samm50        | sorting and assembly machinery component 50 homolog (S. cerevisiae)            | 0               | 2               | 3                | -1.81359            |
| 2908 | 13616   | Edn3          | endothelin 3                                                                   | 0               | 2               | 3                | -1.81349            |
| 2909 | 11512   | Adcy6         | adenylate cyclase 6                                                            | 0               | 2               | 3                | -1.81311            |
| 2910 | 22248   | Unc119        | unc-119 homolog (C. elegans)                                                   | 0               | 2               | 2                | -1.81288            |
| 2911 | 245576  | LOC245576     | phosphoribosyl pyrophosphate synthetase-associated protein 2 pseudogene        | 0               | 2               | 3                | -1.81276            |
| 2912 | 69888   | Cyp2c66       | cytochrome P450, family 2, subfamily c, polypeptide 66                         | 0               | 2               | 2                | -1.8126             |
| 2913 | 27418   | Mkln1         | muskelin 1, intracellular mediator containing kelch motifs                     | 0               | 2               | 3                | -1.81234            |
| 2914 | 22341   | Vegfc         | vascular endothelial growth factor C                                           | 0               | 2               | 3                | -1.81234            |
| 2915 | 12686   | Elov13        | elongation of very long chain fatty acids (FEN1/Elo2, SUR4/Elo3, yeast)-like 3 | 0               | 2               | 2                | -1.81176            |
| 2916 | 66588   | Cmpk          | cytidine monophosphate (UMP-CMP) kinase 1                                      | 0               | 2               | 3                | -1.81171            |
| 2917 | 13877   | Erh           | enhancer of rudimentary homolog (Drosophila)                                   | 0               | 2               | 3                | -1.81136            |
| 2918 | 76971   | 2810007J24Rik | RIKEN cDNA 2810007J24 gene                                                     | 0               | 2               | 3                | -1.81134            |
| 2919 | 21916   | Tmod1         | tropomodulin 1                                                                 | 0               | 2               | 3                | -1.81098            |

Candidates for positive regulators of normal growth (Fisher's)

| Rank | entrez# | Gene Symbol   | Gene name                                                              | enriched shRNAs | depleted shRNAs | no change shRNAs | average Fold Change |
|------|---------|---------------|------------------------------------------------------------------------|-----------------|-----------------|------------------|---------------------|
| 2920 | 26926   | Pdcd8         | apoptosis-inducing factor, mitochondrion-associated 1                  | 0               | 2               | 3                | -1.81096            |
| 2921 | 27062   | Cadps         | Ca <sup>2+</sup> -dependent secretion activator                        | 0               | 2               | 3                | -1.81071            |
| 2922 | 380997  | 9030605E09Rik | cytochrome P450, family 2, subfamily d, polypeptide 12                 | 0               | 2               | 2                | -1.8107             |
| 2923 | 20965   | Syn2          | synapsin II                                                            | 0               | 2               | 3                | -1.81056            |
| 2924 | 217721  | BC011209      | major facilitator superfamily domain containing 7C                     | 0               | 2               | 3                | -1.81015            |
| 2925 | 20598   | Smpd2         | sphingomyelin phosphodiesterase 2, neutral                             | 0               | 2               | 3                | -1.80994            |
| 2926 | 381372  | Gm1890        | NA                                                                     | 0               | 2               | 2                | -1.80964            |
| 2927 | 27999   | D6Wsu176e     | family with sequence similarity 3, member C                            | 0               | 2               | 3                | -1.8092             |
| 2928 | 13602   | Sparcl1       | SPARC-like 1                                                           | 0               | 2               | 3                | -1.80893            |
| 2929 | 69623   | 2310012P17Rik | zinc finger protein 33B                                                | 0               | 2               | 3                | -1.80887            |
| 2930 | 258134  | Olf426        | olfactory receptor 426                                                 | 0               | 2               | 3                | -1.80852            |
| 2931 | 76629   | 1700111I05Rik | Williams-Beuren syndrome chromosome region 28 (human)                  | 0               | 2               | 3                | -1.80827            |
| 2932 | 246746  | Cd300lf       | CD300 antigen like family member F                                     | 0               | 2               | 2                | -1.8079             |
| 2933 | 436444  | UNK           | NA                                                                     | 0               | 2               | 3                | -1.80757            |
| 2934 | 23827   | Bpnt1         | bisphosphate 3'-nucleotidase 1                                         | 0               | 2               | 3                | -1.80734            |
| 2935 | 20638   | Snrpb         | small nuclear ribonucleoprotein B                                      | 0               | 2               | 3                | -1.80729            |
| 2936 | 68460   | Dhrs7c        | dehydrogenase/reductase (SDR family) member 7C                         | 0               | 2               | 2                | -1.80711            |
| 2937 | 71733   | Susd2         | sushi domain containing 2                                              | 0               | 2               | 3                | -1.80674            |
| 2938 | 228012  | Tlk1          | tousled-like kinase 1                                                  | 0               | 2               | 3                | -1.80643            |
| 2939 | 329416  | Nostrin       | nitric oxide synthase trafficker                                       | 0               | 2               | 3                | -1.80595            |
| 2940 | 16770   | Lalba         | lactalbumin, alpha                                                     | 0               | 2               | 2                | -1.80582            |
| 2941 | 240638  | Slc16a12      | solute carrier family 16 (monocarboxylic acid transporters), member 12 | 0               | 2               | 3                | -1.80527            |
| 2942 | 434518  | UNK           | NA                                                                     | 0               | 2               | 3                | -1.8052             |
| 2943 | 109648  | Npy           | neuropeptide Y                                                         | 0               | 2               | 3                | -1.80512            |
| 2944 | 227723  | 5830434P21Rik | proline-rich coiled-coil 2B                                            | 0               | 2               | 3                | -1.80489            |
| 2945 | 382761  | UNK           | NA                                                                     | 0               | 2               | 3                | -1.80481            |
| 2946 | 230558  | C8a           | complement component 8, alpha polypeptide                              | 0               | 2               | 3                | -1.80414            |
| 2947 | 13349   | Darc          | Duffy blood group, chemokine receptor                                  | 0               | 2               | 3                | -1.8041             |
| 2948 | 22646   | Zfp105        | zinc finger protein 105                                                | 0               | 2               | 3                | -1.80363            |
| 2949 | 243300  | 6430598A04Rik | RIKEN cDNA 6430598A04 gene                                             | 0               | 2               | 3                | -1.80333            |
| 2950 | 114714  | Rad51c        | RAD51 homolog c ( <i>S. cerevisiae</i> )                               | 0               | 2               | 3                | -1.8033             |
| 2951 | 233987  | BC003267      | zinc finger protein 958                                                | 0               | 2               | 3                | -1.80284            |
| 2952 | 56174   | Nagk          | N-acetylglucosamine kinase                                             | 0               | 2               | 3                | -1.80215            |
| 2953 | 213895  | Bms1l         | BMS1 homolog, ribosome assembly protein (yeast)                        | 0               | 2               | 3                | -1.80087            |
| 2954 | 20815   | Srpk1         | serine/arginine-rich protein specific kinase 1                         | 0               | 2               | 3                | -1.80017            |
| 2955 | 235050  | BC005471      | zinc finger protein 810                                                | 0               | 2               | 3                | -1.79966            |
| 2956 | 442835  | 9230002F21Rik | defensin beta 22                                                       | 0               | 2               | 3                | -1.79906            |

Candidates for positive regulators of normal growth (Fisher's)

| Rank | entrez# | Gene Symbol   | Gene name                                                             | enriched shRNAs | depleted shRNAs | no change shRNAs | average Fold Change |
|------|---------|---------------|-----------------------------------------------------------------------|-----------------|-----------------|------------------|---------------------|
| 2957 | 208795  | Tmem63a       | transmembrane protein 63a                                             | 0               | 2               | 3                | -1.79887            |
| 2958 | 67337   | Cstf1         | cleavage stimulation factor, 3' pre-RNA, subunit 1                    | 0               | 2               | 3                | -1.79808            |
| 2959 | 114889  | Vsx1          | visual system homeobox 1 homolog (zebrafish)                          | 0               | 2               | 3                | -1.79796            |
| 2960 | 75732   | Iqcd          | IQ motif containing D                                                 | 0               | 2               | 2                | -1.79763            |
| 2961 | 67800   | Dgat2         | diacylglycerol O-acyltransferase 2                                    | 0               | 2               | 3                | -1.79755            |
| 2962 | 52653   | Nudcd2        | NudC domain containing 2                                              | 0               | 2               | 2                | -1.79743            |
| 2963 | 106572  | Rab31         | RAB31, member RAS oncogene family                                     | 0               | 2               | 3                | -1.79723            |
| 2964 | 319468  | Ppm1h         | protein phosphatase 1H (PP2C domain containing)                       | 0               | 2               | 2                | -1.7968             |
| 2965 | 14991   | H2-M3         | histocompatibility 2, M region locus 3                                | 0               | 2               | 3                | -1.79648            |
| 2966 | 54151   | Cyhr1         | cysteine and histidine rich 1                                         | 0               | 2               | 3                | -1.79594            |
| 2967 | 18426   | Ovol1         | OVO homolog-like 1 (Drosophila)                                       | 0               | 2               | 3                | -1.79551            |
| 2968 | 16878   | Lif           | leukemia inhibitory factor                                            | 0               | 2               | 3                | -1.79516            |
| 2969 | 29819   | Stau2         | staufen (RNA binding protein) homolog 2 (Drosophila)                  | 0               | 2               | 3                | -1.79444            |
| 2970 | 72585   | Lypd1         | Ly6/Plaur domain containing 1                                         | 0               | 2               | 3                | -1.7941             |
| 2971 | 22032   | Traf4         | TNF receptor associated factor 4                                      | 0               | 2               | 3                | -1.79386            |
| 2972 | 20416   | Shc1          | src homology 2 domain-containing transforming protein C1              | 0               | 2               | 3                | -1.79318            |
| 2973 | 76983   | Scfd1         | Sec1 family domain containing 1                                       | 0               | 2               | 3                | -1.79292            |
| 2974 | 21429   | Ubtf          | upstream binding transcription factor, RNA polymerase I               | 0               | 2               | 3                | -1.79279            |
| 2975 | 22315   | V2r9          | NA                                                                    | 0               | 2               | 3                | -1.7926             |
| 2976 | 57358   | Cmar          | NA                                                                    | 0               | 2               | 3                | -1.79252            |
| 2977 | 11735   | Ank3          | ankyrin 3, epithelial                                                 | 0               | 2               | 3                | -1.7925             |
| 2978 | 21835   | Thrsp         | thyroid hormone responsive SPOT14 homolog (Rattus)                    | 0               | 2               | 3                | -1.79185            |
| 2979 | 22184   | U2af1-rs2     | zinc finger (CCCH type), RNA binding motif and serine/arginine rich 2 | 0               | 2               | 3                | -1.79136            |
| 2980 | 69754   | Fbxo7         | F-box protein 7                                                       | 0               | 2               | 3                | -1.79119            |
| 2981 | 21389   | Tbx6          | T-box 6                                                               | 0               | 2               | 3                | -1.79068            |
| 2982 | 68240   | Rpa3          | replication protein A3                                                | 0               | 2               | 3                | -1.79026            |
| 2983 | 258216  | Olf1034       | olfactory receptor 1034                                               | 0               | 2               | 2                | -1.79015            |
| 2984 | 69387   | Dnajb13       | DnaJ (Hsp40) related, subfamily B, member 13                          | 0               | 2               | 3                | -1.78929            |
| 2985 | 319930  | Ceacam19      | carcinoembryonic antigen-related cell adhesion molecule 19            | 0               | 2               | 2                | -1.78904            |
| 2986 | 223776  | 1300018J18Rik | RIKEN cDNA 1300018J18 gene                                            | 0               | 2               | 2                | -1.78865            |
| 2987 | 20887   | Sult1a1       | sulfotransferase family 1A, phenol-preferring, member 1               | 0               | 2               | 3                | -1.78864            |
| 2988 | 83762   | Otof          | otoferlin                                                             | 0               | 2               | 3                | -1.78856            |
| 2989 | 20779   | Src           | Rous sarcoma oncogene                                                 | 0               | 2               | 3                | -1.78832            |
| 2990 | 72772   | Rint1         | RAD50 interactor 1                                                    | 0               | 2               | 2                | -1.78789            |
| 2991 | 21899   | Tlr6          | toll-like receptor 6                                                  | 0               | 2               | 3                | -1.78708            |
| 2992 | 71726   | Smug1         | single-strand selective monofunctional uracil DNA glycosylase         | 0               | 2               | 2                | -1.78639            |
| 2993 | 237758  | Zfp454        | zinc finger protein 454                                               | 0               | 2               | 3                | -1.78613            |

Candidates for positive regulators of normal growth (Fisher's)

| Rank | entrez# | Gene Symbol   | Gene name                                                                                   | enriched shRNAs | depleted shRNAs | no change shRNAs | average Fold Change |
|------|---------|---------------|---------------------------------------------------------------------------------------------|-----------------|-----------------|------------------|---------------------|
| 2994 | 83408   | Gimap3        | GTPase, IMAP family member 3                                                                | 0               | 2               | 3                | -1.78509            |
| 2995 | 17123   | Madcam1       | mucosal vascular addressin cell adhesion molecule 1                                         | 0               | 2               | 3                | -1.78501            |
| 2996 | 18557   | Pctk3         | cyclin-dependent kinase 18                                                                  | 0               | 2               | 3                | -1.78451            |
| 2997 | 14407   | Gabrg3        | gamma-aminobutyric acid (GABA) A receptor, subunit gamma 3                                  | 0               | 2               | 3                | -1.78449            |
| 2998 | 58230   | Rnf8          | ring finger protein 8                                                                       | 0               | 2               | 3                | -1.78441            |
| 2999 | 56086   | Set           | SET nuclear oncogene                                                                        | 0               | 2               | 3                | -1.784              |
| 3000 | 239436  | Slc30a8       | solute carrier family 30 (zinc transporter), member 8                                       | 0               | 2               | 3                | -1.78264            |
| 3001 | 257898  | Olfir867      | olfactory receptor 867                                                                      | 0               | 2               | 2                | -1.7826             |
| 3002 | 20725   | Serpinb8      | serine (or cysteine) peptidase inhibitor, clade B, member 8                                 | 0               | 2               | 3                | -1.78205            |
| 3003 | 241794  | LOC241794     | potassium voltage-gated channel, subfamily G, member 1                                      | 0               | 2               | 3                | -1.78204            |
| 3004 | 140580  | Elmo1         | engulfment and cell motility 1, ced-12 homolog (C. elegans)                                 | 0               | 2               | 3                | -1.78181            |
| 3005 | 78240   | Cst11         | cystatin 11                                                                                 | 0               | 2               | 3                | -1.78155            |
| 3006 | 381556  | UNK           | NA                                                                                          | 0               | 2               | 3                | -1.78143            |
| 3007 | 74264   | 1700045119Rik | ring finger protein 138 pseudogene                                                          | 0               | 2               | 3                | -1.78137            |
| 3008 | 21750   | Terf2         | telomeric repeat binding factor 2                                                           | 0               | 2               | 3                | -1.78129            |
| 3009 | 18725   | Pira2         | paired-Ig-like receptor A2                                                                  | 0               | 2               | 3                | -1.78115            |
| 3010 | 69731   | Gemin7        | gem (nuclear organelle) associated protein 7                                                | 0               | 2               | 3                | -1.78018            |
| 3011 | 243900  | 4930432E11Rik | RIKEN cDNA 4930432E11 gene                                                                  | 0               | 2               | 3                | -1.78003            |
| 3012 | 69668   | Ccdc115       | coiled-coil domain containing 115                                                           | 0               | 2               | 3                | -1.77978            |
| 3013 | 22359   | Vldlr         | very low density lipoprotein receptor                                                       | 0               | 2               | 3                | -1.77925            |
| 3014 | 69635   | Dapk1         | death associated protein kinase 1                                                           | 0               | 2               | 3                | -1.779              |
| 3015 | 18400   | Slc22a18      | solute carrier family 22 (organic cation transporter), member 18                            | 0               | 2               | 3                | -1.77888            |
| 3016 | 73503   | Mbd3l1        | methyl-CpG binding domain protein 3-like 1                                                  | 0               | 2               | 3                | -1.77825            |
| 3017 | 16949   | Loxl1         | lysyl oxidase-like 1                                                                        | 0               | 2               | 3                | -1.77794            |
| 3018 | 69046   | Hbld2         | iron-sulfur cluster assembly 1 homolog (S. cerevisiae)                                      | 0               | 2               | 2                | -1.77745            |
| 3019 | 68755   | Cgrrf1        | cell growth regulator with ring finger domain 1                                             | 0               | 2               | 3                | -1.77724            |
| 3020 | 212442  | Lactb2        | lactamase, beta 2                                                                           | 0               | 2               | 2                | -1.77683            |
| 3021 | 18587   | Pde6b         | phosphodiesterase 6B, cGMP, rod receptor, beta polypeptide                                  | 0               | 2               | 2                | -1.77546            |
| 3022 | 11740   | Slc25a5       | solute carrier family 25 (mitochondrial carrier, adenine nucleotide translocator), member 5 | 0               | 2               | 3                | -1.77542            |
| 3023 | 18459   | Pabpc2        | poly(A) binding protein, cytoplasmic 2                                                      | 0               | 2               | 3                | -1.7753             |
| 3024 | 243308  | A430033K04Rik | RIKEN cDNA A430033K04 gene                                                                  | 0               | 2               | 3                | -1.77515            |
| 3025 | 77397   | 9530003J23Rik | RIKEN cDNA 9530003J23 gene                                                                  | 0               | 2               | 3                | -1.77434            |
| 3026 | 52530   | Nola2         | NHP2 ribonucleoprotein homolog (yeast)                                                      | 0               | 2               | 3                | -1.77409            |
| 3027 | 434371  | LOC434371     | NA                                                                                          | 0               | 2               | 3                | -1.77367            |
| 3028 | 240068  | D10628        | zinc finger protein 563                                                                     | 0               | 2               | 3                | -1.77346            |
| 3029 | 56041   | Vdp           | USO1 homolog, vesicle docking protein (yeast)                                               | 0               | 2               | 3                | -1.77321            |
| 3030 | 13857   | Epor          | erythropoietin receptor                                                                     | 0               | 2               | 3                | -1.77294            |

Candidates for positive regulators of normal growth (Fisher's)

| Rank | entrez# | Gene Symbol   | Gene name                                                     | enriched shRNAs | depleted shRNAs | no change shRNAs | average Fold Change |
|------|---------|---------------|---------------------------------------------------------------|-----------------|-----------------|------------------|---------------------|
| 3031 | 71755   | Dhdh          | dihydrodiol dehydrogenase (dimeric)                           | 0               | 2               | 2                | -1.77285            |
| 3032 | 68080   | Atpbd1c       | GPN-loop GTPase 3                                             | 0               | 2               | 3                | -1.77253            |
| 3033 | 14760   | Gpr19         | G protein-coupled receptor 19                                 | 0               | 2               | 3                | -1.77212            |
| 3034 | 12592   | Cdx4          | caudal type homeobox 4                                        | 0               | 2               | 3                | -1.77182            |
| 3035 | 230726  | 9130416B15    | rhomboid, veinlet-like 2 (Drosophila)                         | 0               | 2               | 3                | -1.77157            |
| 3036 | 258955  | Olf531        | olfactory receptor 531                                        | 0               | 2               | 2                | -1.77139            |
| 3037 | 14623   | Gjb6          | gap junction protein, beta 6                                  | 0               | 2               | 3                | -1.77135            |
| 3038 | 434175  | LOC434175     | predicted gene 5593                                           | 0               | 2               | 3                | -1.77116            |
| 3039 | 207425  | Brwd2         | WD repeat domain 11                                           | 0               | 2               | 2                | -1.77104            |
| 3040 | 20219   | Apcs          | serum amyloid P-component                                     | 0               | 2               | 3                | -1.77102            |
| 3041 | 72297   | B3gnt3        | UDP-GlcNAc:betaGal beta-1,3-N-acetylglucosaminyltransferase 3 | 0               | 2               | 3                | -1.77011            |
| 3042 | 66606   | Lrrc57        | leucine rich repeat containing 57                             | 0               | 2               | 2                | -1.76964            |
| 3043 | 52686   | Mettl2        | methyltransferase like 2                                      | 0               | 2               | 3                | -1.76931            |
| 3044 | 230674  | Mjmd2a        | lysine (K)-specific demethylase 4A                            | 0               | 2               | 3                | -1.76915            |
| 3045 | 22427   | Wrn           | Werner syndrome homolog (human)                               | 0               | 2               | 3                | -1.76891            |
| 3046 | 436196  | LOC436196     | predicted pseudogene 5755                                     | 0               | 2               | 3                | -1.76835            |
| 3047 | 108098  | Surb7         | mediator complex subunit 21                                   | 0               | 2               | 3                | -1.76811            |
| 3048 | 59091   | Jph2          | junctophilin 2                                                | 0               | 2               | 3                | -1.76764            |
| 3049 | 83555   | Tex13         | testis expressed gene 13                                      | 0               | 2               | 2                | -1.76748            |
| 3050 | 69479   | 1700029J07Rik | RIKEN cDNA 1700029J07 gene                                    | 0               | 2               | 3                | -1.76748            |
| 3051 | 67729   | Mansc1        | MANSC domain containing 1                                     | 0               | 2               | 3                | -1.76726            |
| 3052 | 58176   | Rhbg          | Rhesus blood group-associated B glycoprotein                  | 0               | 2               | 3                | -1.76693            |
| 3053 | 22017   | Tpmt          | thiopurine methyltransferase                                  | 0               | 2               | 3                | -1.76691            |
| 3054 | 26889   | Cln8          | ceroid-lipofuscinosis, neuronal 8                             | 0               | 2               | 3                | -1.76679            |
| 3055 | 54132   | Pdim1         | PDZ and LIM domain 1 (elfin)                                  | 0               | 2               | 3                | -1.76671            |
| 3056 | 142682  | Zcchc14       | zinc finger, CCHC domain containing 14                        | 0               | 2               | 3                | -1.76638            |
| 3057 | 214239  | A430105I19Rik | RIKEN cDNA A430105I19 gene                                    | 0               | 2               | 3                | -1.76634            |
| 3058 | 18617   | Rhox5         | reproductive homeobox 5                                       | 0               | 2               | 3                | -1.76628            |
| 3059 | 66864   | Clec14a       | C-type lectin domain family 14, member a                      | 0               | 2               | 3                | -1.76614            |
| 3060 | 67382   | Brd3          | bromodomain containing 3                                      | 0               | 2               | 3                | -1.76593            |
| 3061 | 236733  | Usp11         | ubiquitin specific peptidase 11                               | 0               | 2               | 3                | -1.76575            |
| 3062 | 67466   | Pdcl          | phosducin-like                                                | 0               | 2               | 3                | -1.76541            |
| 3063 | 54152   | Dnalc4        | dynein, axonemal, light chain 4                               | 0               | 2               | 3                | -1.76487            |
| 3064 | 54192   | Pbsn          | probasin                                                      | 0               | 2               | 3                | -1.76484            |
| 3065 | 18372   | Olf8          | olfactory receptor 8                                          | 0               | 2               | 2                | -1.76483            |
| 3066 | 107305  | Vps37c        | vacuolar protein sorting 37C (yeast)                          | 0               | 2               | 3                | -1.76456            |
| 3067 | 56519   | Defb4         | defensin beta 4                                               | 0               | 2               | 3                | -1.76444            |

Candidates for positive regulators of normal growth (Fisher's)

| Rank | entrez# | Gene Symbol   | Gene name                                                                        | enriched shRNAs | depleted shRNAs | no change shRNAs | average Fold Change |
|------|---------|---------------|----------------------------------------------------------------------------------|-----------------|-----------------|------------------|---------------------|
| 3068 | 73316   | Calr3         | calreticulin 3                                                                   | 0               | 2               | 2                | -1.76432            |
| 3069 | 230279  | 6330416G13Rik | RIKEN cDNA 6330416G13 gene                                                       | 0               | 2               | 2                | -1.76428            |
| 3070 | 20733   | Spint2        | serine protease inhibitor, Kunitz type 2                                         | 0               | 2               | 3                | -1.76413            |
| 3071 | 16885   | Limk1         | LIM-domain containing, protein kinase                                            | 0               | 2               | 3                | -1.76399            |
| 3072 | 23992   | Prkra         | protein kinase, interferon inducible double stranded RNA dependent activator     | 0               | 2               | 3                | -1.76354            |
| 3073 | 259123  | Olf632        | olfactory receptor 632                                                           | 0               | 2               | 2                | -1.76334            |
| 3074 | 67201   | 2700085E05Rik | glyoxalase domain containing 4                                                   | 0               | 2               | 3                | -1.76324            |
| 3075 | 22041   | Trf           | transferrin                                                                      | 0               | 2               | 3                | -1.76295            |
| 3076 | 18216   | Ntsr1         | neurotensin receptor 1                                                           | 0               | 2               | 3                | -1.76237            |
| 3077 | 14387   | Gaa           | glucosidase, alpha, acid                                                         | 0               | 2               | 3                | -1.76231            |
| 3078 | 226541  | Klhl20        | kelch-like 20 (Drosophila)                                                       | 0               | 2               | 3                | -1.76195            |
| 3079 | 259064  | Olf124        | olfactory receptor 124                                                           | 0               | 2               | 3                | -1.76181            |
| 3080 | 15135   | Hbb-y         | hemoglobin Y, beta-like embryonic chain                                          | 0               | 2               | 3                | -1.76173            |
| 3081 | 170571  | Cntnap4       | contactin associated protein-like 4                                              | 0               | 2               | 2                | -1.76161            |
| 3082 | 217684  | 4933426M11Rik | RIKEN cDNA 4933426M11 gene                                                       | 0               | 2               | 3                | -1.7612             |
| 3083 | 93724   | Pcdhga12      | protocadherin gamma subfamily A, 12                                              | 0               | 2               | 3                | -1.76106            |
| 3084 | 11974   | Atp6v0e       | ATPase, H+ transporting, lysosomal V0 subunit E                                  | 0               | 2               | 3                | -1.76047            |
| 3085 | 54451   | Cpsf3         | cleavage and polyadenylation specificity factor 3                                | 0               | 2               | 3                | -1.76046            |
| 3086 | 17763   | Mtcp1         | mature T cell proliferation 1                                                    | 0               | 2               | 3                | -1.76006            |
| 3087 | 51792   | Ppp2r1a       | protein phosphatase 2 (formerly 2A), regulatory subunit A (PR 65), alpha isoform | 0               | 2               | 3                | -1.75962            |
| 3088 | 258564  | Olf1015       | olfactory receptor 1015                                                          | 0               | 2               | 3                | -1.75953            |
| 3089 | 102570  | Slc22a13      | solute carrier family 22 (organic cation transporter), member 13                 | 0               | 2               | 3                | -1.75933            |
| 3090 | 223267  | BC006662      | AlG2-like domain 1                                                               | 0               | 2               | 3                | -1.75905            |
| 3091 | 19146   | Prss7         | transmembrane protease, serine 15                                                | 0               | 2               | 3                | -1.75868            |
| 3092 | 270120  | Fat3          | FAT tumor suppressor homolog 3 (Drosophila)                                      | 0               | 2               | 3                | -1.75849            |
| 3093 | 50758   | Fbxl17        | F-box and leucine-rich repeat protein 17                                         | 0               | 2               | 3                | -1.75825            |
| 3094 | 20937   | Suv39h1       | suppressor of variegation 3-9 homolog 1 (Drosophila)                             | 0               | 2               | 3                | -1.75808            |
| 3095 | 76793   | Snip1         | Smad nuclear interacting protein 1                                               | 0               | 2               | 3                | -1.75742            |
| 3096 | 77809   | Lrrc42        | leucine rich repeat containing 42                                                | 0               | 2               | 2                | -1.75727            |
| 3097 | 216164  | Dos           | NA                                                                               | 0               | 2               | 2                | -1.75718            |
| 3098 | 241230  | St8sia6       | ST8 alpha-N-acetyl-neuraminide alpha-2,8-sialyltransferase 6                     | 0               | 2               | 3                | -1.75702            |
| 3099 | 70202   | 2310051M13Rik | cathepsin L-like 3                                                               | 0               | 2               | 3                | -1.7569             |
| 3100 | 270672  | Map3k15       | mitogen-activated protein kinase kinase kinase 15                                | 0               | 2               | 3                | -1.75662            |
| 3101 | 18294   | Ogg1          | 8-oxoguanine DNA-glycosylase 1                                                   | 0               | 2               | 3                | -1.75634            |
| 3102 | 170823  | Glmn          | glomulin, FKBP associated protein                                                | 0               | 2               | 3                | -1.75629            |
| 3103 | 20340   | Glg1          | golgi apparatus protein 1                                                        | 0               | 2               | 3                | -1.75603            |
| 3104 | 18457   | Pldn          | pallidin                                                                         | 0               | 2               | 3                | -1.75583            |

Candidates for positive regulators of normal growth (Fisher's)

| Rank | entrez# | Gene Symbol   | Gene name                                                                        | enriched shRNAs | depleted shRNAs | no change shRNAs | average Fold Change |
|------|---------|---------------|----------------------------------------------------------------------------------|-----------------|-----------------|------------------|---------------------|
| 3105 | 269437  | Pich1         | phospholipase C, eta 1                                                           | 0               | 2               | 3                | -1.75573            |
| 3106 | 70207   | Ccdc44        | translational activator of mitochondrially encoded cytochrome c oxidase I        | 0               | 2               | 2                | -1.7554             |
| 3107 | 54402   | Stk19         | serine/threonine kinase 19                                                       | 0               | 2               | 3                | -1.75514            |
| 3108 | 56631   | Trim17        | tripartite motif-containing 17                                                   | 0               | 2               | 3                | -1.75382            |
| 3109 | 70211   | 2810407A14Rik | NA                                                                               | 0               | 2               | 3                | -1.75325            |
| 3110 | 225608  | Sh3tc2        | SH3 domain and tetratricopeptide repeats 2                                       | 0               | 2               | 2                | -1.75284            |
| 3111 | 84682   | Cox4i2        | cytochrome c oxidase subunit IV isoform 2                                        | 0               | 2               | 3                | -1.75241            |
| 3112 | 15469   | Prmt1         | protein arginine N-methyltransferase 1                                           | 0               | 2               | 2                | -1.75208            |
| 3113 | 210741  | Kcnk12        | potassium channel, subfamily K, member 12                                        | 0               | 2               | 3                | -1.75182            |
| 3114 | 20443   | St3gal4       | ST3 beta-galactoside alpha-2,3-sialyltransferase 4                               | 0               | 2               | 3                | -1.75179            |
| 3115 | 19152   | Prtn3         | proteinase 3                                                                     | 0               | 2               | 3                | -1.75172            |
| 3116 | 71710   | Lrrcc1        | leucine rich repeat and coiled-coil domain containing 1                          | 0               | 2               | 3                | -1.75094            |
| 3117 | 213541  | Ythdf2        | YTH domain family 2                                                              | 0               | 2               | 2                | -1.74871            |
| 3118 | 50850   | Spast         | spastin                                                                          | 0               | 2               | 2                | -1.74856            |
| 3119 | 53325   | Banp          | BTG3 associated nuclear protein                                                  | 0               | 2               | 3                | -1.7482             |
| 3120 | 171382  | Trpm8         | transient receptor potential cation channel, subfamily M, member 8               | 0               | 2               | 3                | -1.74799            |
| 3121 | 52466   | D11Erdt18e    | solute carrier family 46, member 1                                               | 0               | 2               | 3                | -1.74799            |
| 3122 | 56371   | Fzr1          | fizzy/cell division cycle 20 related 1 (Drosophila)                              | 0               | 2               | 3                | -1.74698            |
| 3123 | 104080  | Nxph4         | neurexophilin 4                                                                  | 0               | 2               | 3                | -1.74693            |
| 3124 | 14767   | Nmur1         | neuromedin U receptor 1                                                          | 0               | 2               | 3                | -1.74682            |
| 3125 | 434197  | LOC434197     | family with sequence similarity 169, member B                                    | 0               | 2               | 3                | -1.74622            |
| 3126 | 53375   | Mtx2          | metaxin 2                                                                        | 0               | 2               | 3                | -1.74542            |
| 3127 | 19697   | Rela          | v-rel reticuloendotheliosis viral oncogene homolog A (avian)                     | 0               | 2               | 2                | -1.74501            |
| 3128 | 70956   | 4921530G04Rik | testis expressed gene 19.2                                                       | 0               | 2               | 2                | -1.74497            |
| 3129 | 104252  | Cdc42ep2      | CDC42 effector protein (Rho GTPase binding) 2                                    | 0               | 2               | 2                | -1.74483            |
| 3130 | 102580  | Alg9          | asparagine-linked glycosylation 9 homolog (yeast, alpha 1,2 mannosyltransferase) | 0               | 2               | 3                | -1.74481            |
| 3131 | 242691  | Gpatc3        | G patch domain containing 3                                                      | 0               | 2               | 3                | -1.74458            |
| 3132 | 22353   | Vip           | vasoactive intestinal polypeptide                                                | 0               | 2               | 3                | -1.74381            |
| 3133 | 22074   | Try4          | trypsin 4                                                                        | 0               | 2               | 3                | -1.74341            |
| 3134 | 347710  | Pramel5       | preferentially expressed antigen in melanoma like 4                              | 0               | 2               | 2                | -1.74306            |
| 3135 | 171506  | H1foo         | H1 histone family, member O, oocyte-specific                                     | 0               | 2               | 3                | -1.74303            |
| 3136 | 17761   | Mtap7         | microtubule-associated protein 7                                                 | 0               | 2               | 3                | -1.74302            |
| 3137 | 80902   | Zfp202        | zinc finger protein 202                                                          | 0               | 2               | 3                | -1.74274            |
| 3138 | 75645   | 1700011F14Rik | RIKEN cDNA 1700011F14 gene                                                       | 0               | 2               | 3                | -1.7427             |
| 3139 | 268741  | 5730589K01Rik | TOX high mobility group box family member 4                                      | 0               | 2               | 3                | -1.74253            |
| 3140 | 272661  | UNK           | NA                                                                               | 0               | 2               | 3                | -1.74239            |
| 3141 | 66525   | Timm50        | translocase of inner mitochondrial membrane 50 homolog (yeast)                   | 0               | 2               | 3                | -1.74177            |



Candidates for positive regulators of normal growth (Fisher's)

| Rank | entrez# | Gene Symbol   | Gene name                                                                         | enriched shRNAs | depleted shRNAs | no change shRNAs | average Fold Change |
|------|---------|---------------|-----------------------------------------------------------------------------------|-----------------|-----------------|------------------|---------------------|
| 3142 | 16866   | Lhb           | luteinizing hormone beta                                                          | 0               | 2               | 3                | -1.74171            |
| 3143 | 14432   | Gap43         | growth associated protein 43                                                      | 0               | 2               | 3                | -1.74142            |
| 3144 | 258792  | Olfir1499     | olfactory receptor 1499                                                           | 0               | 2               | 3                | -1.741              |
| 3145 | 228770  | Rspo4         | R-spondin family, member 4                                                        | 0               | 2               | 3                | -1.74063            |
| 3146 | 71885   | 2310003H01Rik | RIKEN cDNA 2310003H01 gene                                                        | 0               | 2               | 2                | -1.74043            |
| 3147 | 11545   | Parp1         | poly (ADP-ribose) polymerase family, member 1                                     | 0               | 2               | 3                | -1.7403             |
| 3148 | 15285   | Hlxb9         | motor neuron and pancreas homeobox 1                                              | 0               | 2               | 3                | -1.74019            |
| 3149 | 216134  | Pdxk          | pyridoxal (pyridoxine, vitamin B6) kinase                                         | 0               | 2               | 3                | -1.74014            |
| 3150 | 22116   | Stk22s1       | testis-specific serine kinase substrate                                           | 0               | 2               | 3                | -1.73913            |
| 3151 | 56193   | Plek          | pleckstrin                                                                        | 0               | 2               | 3                | -1.73909            |
| 3152 | 272381  | Lrrc4b        | leucine rich repeat containing 4B                                                 | 0               | 2               | 3                | -1.73831            |
| 3153 | 404222  | Olfir244      | olfactory receptor 231                                                            | 0               | 2               | 3                | -1.73826            |
| 3154 | 320040  | 9930039A11Rik | ring finger protein 222                                                           | 0               | 2               | 3                | -1.73791            |
| 3155 | 76688   | Arfrp1        | ADP-ribosylation factor related protein 1                                         | 0               | 2               | 3                | -1.73721            |
| 3156 | 68259   | Ift80         | intraflagellar transport 80 homolog (Chlamydomonas)                               | 0               | 2               | 3                | -1.73701            |
| 3157 | 17173   | Ascl2         | achaete-scute complex homolog 2 (Drosophila)                                      | 0               | 2               | 3                | -1.73682            |
| 3158 | 56222   | Cited4        | Cbp/p300-interacting transactivator, with Glu/Asp-rich carboxy-terminal domain, 4 | 0               | 2               | 3                | -1.73667            |
| 3159 | 12724   | Cicn2         | chloride channel 2                                                                | 0               | 2               | 3                | -1.73643            |
| 3160 | 228662  | Btdb3         | BTB (POZ) domain containing 3                                                     | 0               | 2               | 3                | -1.73629            |
| 3161 | 98752   | Fcrla         | Fc receptor-like A                                                                | 0               | 2               | 3                | -1.73624            |
| 3162 | 21816   | Tgm1          | transglutaminase 1, K polypeptide                                                 | 0               | 2               | 3                | -1.73576            |
| 3163 | 14732   | Gpam          | glycerol-3-phosphate acyltransferase, mitochondrial                               | 0               | 2               | 3                | -1.73571            |
| 3164 | 83702   | Akr1c6        | aldo-keto reductase family 1, member C6                                           | 0               | 2               | 3                | -1.73563            |
| 3165 | 114660  | Etos1         | ectopic ossification 1                                                            | 0               | 2               | 2                | -1.7355             |
| 3166 | 53861   | Zranb2        | zinc finger, RAN-binding domain containing 2                                      | 0               | 2               | 3                | -1.73546            |
| 3167 | 209387  | Al451617      | tripartite motif-containing 30D                                                   | 0               | 2               | 3                | -1.7354             |
| 3168 | 20751   | Spr           | sepiapterin reductase                                                             | 0               | 2               | 3                | -1.73518            |
| 3169 | 80888   | Hspb8         | heat shock protein 8                                                              | 0               | 2               | 3                | -1.73512            |
| 3170 | 329470  | 2610203E10Rik | 1-aminocyclopropane-1-carboxylate synthase homolog (Arabidopsis)(non-functional)  | 0               | 2               | 3                | -1.73487            |
| 3171 | 228576  | Mall          | mal, T cell differentiation protein-like                                          | 0               | 2               | 3                | -1.73452            |
| 3172 | 14829   | Grpr          | gastrin releasing peptide receptor                                                | 0               | 2               | 3                | -1.73452            |
| 3173 | 240832  | Tor1aip2      | torsin A interacting protein 2                                                    | 0               | 2               | 2                | -1.73399            |
| 3174 | 16184   | Il2ra         | interleukin 2 receptor, alpha chain                                               | 0               | 2               | 3                | -1.73384            |
| 3175 | 103573  | Xpo1          | exportin 1, CRM1 homolog (yeast)                                                  | 0               | 2               | 3                | -1.73363            |
| 3176 | 216151  | Polrmt        | polymerase (RNA) mitochondrial (DNA directed)                                     | 0               | 2               | 3                | -1.733              |
| 3177 | 231549  | Lrrc8d        | leucine rich repeat containing 8D                                                 | 0               | 2               | 2                | -1.73277            |
| 3178 | 246316  | Lgi2          | leucine-rich repeat LGI family, member 2                                          | 0               | 2               | 3                | -1.73238            |

Candidates for positive regulators of normal growth (Fisher's)

| Rank | entrez# | Gene Symbol   | Gene name                                                             | enriched shRNAs | depleted shRNAs | no change shRNAs | average Fold Change |
|------|---------|---------------|-----------------------------------------------------------------------|-----------------|-----------------|------------------|---------------------|
| 3179 | 15461   | Hras1         | Harvey rat sarcoma virus oncogene 1                                   | 0               | 2               | 3                | -1.73228            |
| 3180 | 11428   | Aco1          | aconitase 1                                                           | 0               | 2               | 3                | -1.73205            |
| 3181 | 11801   | Cd5l          | CD5 antigen-like                                                      | 0               | 2               | 3                | -1.73171            |
| 3182 | 64010   | Sav1          | salvador homolog 1 (Drosophila)                                       | 0               | 2               | 3                | -1.73145            |
| 3183 | 258534  | Olf1361       | olfactory receptor 1361                                               | 0               | 2               | 3                | -1.73139            |
| 3184 | 108670  | Epsti1        | epithelial stromal interaction 1 (breast)                             | 0               | 2               | 2                | -1.7313             |
| 3185 | 12794   | Cnih2         | cornichon homolog 2 (Drosophila)                                      | 0               | 2               | 3                | -1.7307             |
| 3186 | 72381   | 2210409E12Rik | transcription elongation factor B (SIII), polypeptide 2 pseudogene    | 0               | 2               | 2                | -1.73058            |
| 3187 | 73293   | Ccdc103       | coiled-coil domain containing 103                                     | 0               | 2               | 3                | -1.73047            |
| 3188 | 101240  | 9530020G05Rik | WD repeat domain 91                                                   | 0               | 2               | 2                | -1.73024            |
| 3189 | 12006   | Axin2         | axin2                                                                 | 0               | 2               | 3                | -1.73015            |
| 3190 | 17921   | Myo7a         | myosin VIIA                                                           | 0               | 2               | 3                | -1.73004            |
| 3191 | 319178  | Hist1h2bb     | histone cluster 1, H2bb                                               | 0               | 2               | 3                | -1.73003            |
| 3192 | 20617   | Snca          | synuclein, alpha                                                      | 0               | 2               | 3                | -1.72943            |
| 3193 | 237880  | 1700071K01Rik | RIKEN cDNA 1700071K01 gene                                            | 0               | 2               | 3                | -1.72924            |
| 3194 | 14159   | Fes           | feline sarcoma oncogene                                               | 0               | 2               | 3                | -1.72893            |
| 3195 | 66277   | Klf15         | Kruppel-like factor 15                                                | 0               | 2               | 3                | -1.72857            |
| 3196 | 19204   | Ptafr         | platelet-activating factor receptor                                   | 0               | 2               | 3                | -1.72734            |
| 3197 | 233726  | Ipo7          | importin 7                                                            | 0               | 2               | 3                | -1.7271             |
| 3198 | 15267   | Hist2h2aa1    | histone cluster 2, H2aa1                                              | 0               | 2               | 3                | -1.72699            |
| 3199 | 54673   | Sh3glb1       | SH3-domain GRB2-like B1 (endophilin)                                  | 0               | 2               | 3                | -1.72693            |
| 3200 | 66175   | Mustn1        | musculoskeletal, embryonic nuclear protein 1                          | 0               | 2               | 3                | -1.72678            |
| 3201 | 230866  | C230096C10Rik | RIKEN cDNA C230096C10 gene                                            | 0               | 2               | 2                | -1.72667            |
| 3202 | 21954   | Tnni3         | troponin I, cardiac 3                                                 | 0               | 2               | 2                | -1.72615            |
| 3203 | 57895   | 6330407D12Rik | coiled-coil domain containing 126                                     | 0               | 2               | 3                | -1.72615            |
| 3204 | 66932   | Rexo1         | REX1, RNA exonuclease 1 homolog (S. cerevisiae)                       | 0               | 2               | 3                | -1.72613            |
| 3205 | 18973   | Pole          | polymerase (DNA directed), epsilon                                    | 0               | 2               | 3                | -1.72607            |
| 3206 | 320734  | C920008G01Rik | RIKEN cDNA C920008G01 gene                                            | 0               | 2               | 3                | -1.72553            |
| 3207 | 229699  | Slc16a4       | solute carrier family 16 (monocarboxylic acid transporters), member 4 | 0               | 2               | 3                | -1.72538            |
| 3208 | 12348   | Car11         | carbonic anhydrase 11                                                 | 0               | 2               | 3                | -1.72502            |
| 3209 | 435667  | UNK           | NA                                                                    | 0               | 2               | 3                | -1.7248             |
| 3210 | 71412   | Dhrs2         | dehydrogenase/reductase member 2                                      | 0               | 2               | 3                | -1.72339            |
| 3211 | 70454   | Cenpl         | centromere protein L                                                  | 0               | 2               | 2                | -1.72338            |
| 3212 | 11481   | Acvr2b        | activin receptor IIB                                                  | 0               | 2               | 3                | -1.7233             |
| 3213 | 381406  | 2810408M09Rik | RIKEN cDNA 2810408M09 gene                                            | 0               | 2               | 3                | -1.7229             |
| 3214 | 66047   | Mrpl54        | mitochondrial ribosomal protein L54                                   | 0               | 2               | 2                | -1.72267            |
| 3215 | 51795   | Srpx          | sushi-repeat-containing protein                                       | 0               | 2               | 2                | -1.72246            |

Candidates for positive regulators of normal growth (Fisher's)

| Rank | entrez# | Gene Symbol   | Gene name                                                                          | enriched shRNAs | depleted shRNAs | no change shRNAs | average Fold Change |
|------|---------|---------------|------------------------------------------------------------------------------------|-----------------|-----------------|------------------|---------------------|
| 3216 | 19058   | Ppp3r1        | protein phosphatase 3, regulatory subunit B, alpha isoform (calcineurin B, type I) | 0               | 2               | 3                | -1.72245            |
| 3217 | 320974  | B430119L13Rik | leucine rich repeat neuronal 4                                                     | 0               | 2               | 3                | -1.7223             |
| 3218 | 84506   | Hamp1         | hepcidin antimicrobial peptide                                                     | 0               | 2               | 3                | -1.72175            |
| 3219 | 74123   | Foxp4         | forkhead box P4                                                                    | 0               | 2               | 3                | -1.72159            |
| 3220 | 53404   | Atoh7         | atonal homolog 7 (Drosophila)                                                      | 0               | 2               | 3                | -1.72156            |
| 3221 | 380713  | Scarf1        | scavenger receptor class F, member 1                                               | 0               | 2               | 3                | -1.72126            |
| 3222 | 66462   | 2810428115Rik | RIKEN cDNA 2810428115 gene                                                         | 0               | 2               | 3                | -1.72113            |
| 3223 | 22722   | Zfp64         | zinc finger protein 64                                                             | 0               | 2               | 3                | -1.72073            |
| 3224 | 73635   | 1700113I22Rik | RIKEN cDNA 1700113I22 gene                                                         | 0               | 2               | 3                | -1.72058            |
| 3225 | 18302   | Oit3          | oncoprotein induced transcript 3                                                   | 0               | 2               | 3                | -1.72052            |
| 3226 | 75671   | Tex22         | testis expressed gene 22                                                           | 0               | 2               | 3                | -1.72033            |
| 3227 | 246747  | BC054059      | adipogenin                                                                         | 0               | 2               | 3                | -1.71975            |
| 3228 | 15168   | Hcn3          | hyperpolarization-activated, cyclic nucleotide-gated K+ 3                          | 0               | 2               | 3                | -1.71914            |
| 3229 | 109676  | Ank2          | ankyrin 2, brain                                                                   | 0               | 2               | 3                | -1.71898            |
| 3230 | 12638   | Cfr           | cystic fibrosis transmembrane conductance regulator homolog                        | 0               | 2               | 3                | -1.71888            |
| 3231 | 22145   | Tuba4         | tubulin, alpha 4A                                                                  | 0               | 2               | 3                | -1.71841            |
| 3232 | 245622  | BC031748      | family with sequence similarity 199, X-linked                                      | 0               | 2               | 2                | -1.71835            |
| 3233 | 83984   | Tssk6         | testis-specific serine kinase 6                                                    | 0               | 2               | 3                | -1.71728            |
| 3234 | 19650   | Rbl1          | retinoblastoma-like 1 (p107)                                                       | 0               | 2               | 3                | -1.71597            |
| 3235 | 433822  | UNK           | NA                                                                                 | 0               | 2               | 2                | -1.71576            |
| 3236 | 68193   | Rpl24         | ribosomal protein L24                                                              | 0               | 2               | 3                | -1.71504            |
| 3237 | 234734  | Aars          | alanyl-tRNA synthetase                                                             | 0               | 2               | 3                | -1.71325            |
| 3238 | 24047   | Ccl19         | chemokine (C-C motif) ligand 19                                                    | 0               | 2               | 3                | -1.7131             |
| 3239 | 231287  | Atp10d        | ATPase, class V, type 10D                                                          | 0               | 2               | 3                | -1.7119             |
| 3240 | 381101  | BC048355      | cDNA sequence BC048355                                                             | 0               | 2               | 3                | -1.71149            |
| 3241 | 14590   | Ggh           | gamma-glutamyl hydrolase                                                           | 0               | 2               | 3                | -1.71061            |
| 3242 | 19348   | Kif20a        | kinesin family member 20A                                                          | 0               | 2               | 3                | -1.71031            |
| 3243 | 67675   | Cuta          | cutA divalent cation tolerance homolog (E. coli)                                   | 0               | 2               | 3                | -1.71019            |
| 3244 | 19142   | Prss12        | protease, serine, 12 neurotrypsin (motopsin)                                       | 0               | 2               | 3                | -1.71008            |
| 3245 | 22608   | Ybx1          | Y box protein 1                                                                    | 0               | 2               | 3                | -1.71               |
| 3246 | 20927   | Abcc8         | ATP-binding cassette, sub-family C (CFTR/MRP), member 8                            | 0               | 2               | 3                | -1.70955            |
| 3247 | 107141  | Cyp2c50       | cytochrome P450, family 2, subfamily c, polypeptide 50                             | 0               | 2               | 3                | -1.70955            |
| 3248 | 50498   | Ebi3          | Epstein-Barr virus induced gene 3                                                  | 0               | 2               | 3                | -1.70929            |
| 3249 | 14170   | Fgf15         | fibroblast growth factor 15                                                        | 0               | 2               | 3                | -1.70924            |
| 3250 | 83703   | Dbr1          | debranching enzyme homolog 1 (S. cerevisiae)                                       | 0               | 2               | 3                | -1.70902            |
| 3251 | 328280  | Rslcan24      | predicted gene 10037                                                               | 0               | 2               | 3                | -1.7082             |
| 3252 | 218977  | Dlg7          | discs, large (Drosophila) homolog-associated protein 5                             | 0               | 2               | 3                | -1.7079             |

Candidates for positive regulators of normal growth (Fisher's)

| Rank | entrez# | Gene Symbol   | Gene name                                                             | enriched shRNAs | depleted shRNAs | no change shRNAs | average Fold Change |
|------|---------|---------------|-----------------------------------------------------------------------|-----------------|-----------------|------------------|---------------------|
| 3253 | 18772   | Pkp1          | plakophilin 1                                                         | 0               | 2               | 3                | -1.70769            |
| 3254 | 14198   | Fhit          | fragile histidine triad gene                                          | 0               | 2               | 3                | -1.70733            |
| 3255 | 74342   | Lrrtm1        | leucine rich repeat transmembrane neuronal 1                          | 0               | 2               | 3                | -1.70727            |
| 3256 | 57916   | Tnfrsf13b     | tumor necrosis factor receptor superfamily, member 13b                | 0               | 2               | 3                | -1.70723            |
| 3257 | 73660   | Cabp4         | calcium binding protein 4                                             | 0               | 2               | 3                | -1.70705            |
| 3258 | 434349  | UNK           | NA                                                                    | 0               | 2               | 3                | -1.70692            |
| 3259 | 231332  | AY487415      | phosphoprotein enriched in astrocytes 15B                             | 0               | 2               | 2                | -1.70688            |
| 3260 | 13429   | Dnm1          | dynamamin 1                                                           | 0               | 2               | 3                | -1.7066             |
| 3261 | 231600  | Chfr          | checkpoint with forkhead and ring finger domains                      | 0               | 2               | 3                | -1.7065             |
| 3262 | 22526   | Xmr           | predicted gene 4836                                                   | 0               | 2               | 3                | -1.70635            |
| 3263 | 70026   | Bzrp1         | translocator protein 2                                                | 0               | 2               | 3                | -1.70567            |
| 3264 | 11777   | Ap3s1         | adaptor-related protein complex 3, sigma 1 subunit                    | 0               | 2               | 3                | -1.70532            |
| 3265 | 12909   | Crcp          | calcitonin gene-related peptide-receptor component protein            | 0               | 2               | 2                | -1.70514            |
| 3266 | 319185  | Hist1h2bl     | histone cluster 1, H2bl                                               | 0               | 2               | 3                | -1.70452            |
| 3267 | 228869  | Ncoa5         | nuclear receptor coactivator 5                                        | 0               | 2               | 3                | -1.7045             |
| 3268 | 68044   | 2510006C20Rik | ChaC, cation transport regulator homolog 2 (E. coli)                  | 0               | 2               | 3                | -1.7044             |
| 3269 | 382264  | UNK           | NA                                                                    | 0               | 2               | 3                | -1.70427            |
| 3270 | 56335   | Mettl3        | methyltransferase like 3                                              | 0               | 2               | 3                | -1.70372            |
| 3271 | 330723  | Htra4         | HtrA serine peptidase 4                                               | 0               | 2               | 3                | -1.70371            |
| 3272 | 394433  | Ugt1a5        | UDP glucuronosyltransferase 1 family, polypeptide A5                  | 0               | 2               | 3                | -1.70347            |
| 3273 | 22223   | Uchl1         | ubiquitin carboxy-terminal hydrolase L1                               | 0               | 2               | 3                | -1.70297            |
| 3274 | 14376   | Ganab         | alpha glucosidase 2 alpha neutral subunit                             | 0               | 2               | 3                | -1.70256            |
| 3275 | 21341   | Taf1c         | TATA box binding protein (Tbp)-associated factor, RNA polymerase I, C | 0               | 2               | 3                | -1.70241            |
| 3276 | 20384   | Sfrs5         | serine/arginine-rich splicing factor 5                                | 0               | 2               | 3                | -1.70202            |
| 3277 | 69019   | Spcs1         | signal peptidase complex subunit 1 homolog (S. cerevisiae)            | 0               | 2               | 3                | -1.70144            |
| 3278 | 74048   | 4632428N05Rik | RIKEN cDNA 4632428N05 gene                                            | 0               | 2               | 3                | -1.70111            |
| 3279 | 23831   | Car14         | carbonic anhydrase 14                                                 | 0               | 2               | 3                | -1.70103            |
| 3280 | 93876   | Pcdhb5        | protocadherin beta 5                                                  | 0               | 2               | 3                | -1.70068            |
| 3281 | 20516   | Slc20a2       | solute carrier family 20, member 2                                    | 0               | 2               | 3                | -1.70055            |
| 3282 | 68449   | Tbc1d10b      | TBC1 domain family, member 10b                                        | 0               | 2               | 3                | -1.7002             |
| 3283 | 20692   | Sparc         | secreted acidic cysteine rich glycoprotein                            | 0               | 2               | 2                | -1.69985            |
| 3284 | 51811   | Clec4f        | C-type lectin domain family 4, member f                               | 0               | 2               | 3                | -1.69912            |
| 3285 | 11500   | Adam7         | a disintegrin and metallopeptidase domain 7                           | 0               | 2               | 3                | -1.6989             |
| 3286 | 67888   | Tmem100       | transmembrane protein 100                                             | 0               | 2               | 2                | -1.69852            |
| 3287 | 12978   | Csf1r         | colony stimulating factor 1 receptor                                  | 0               | 2               | 3                | -1.69814            |
| 3288 | 258964  | Olfir541      | olfactory receptor 541                                                | 0               | 2               | 2                | -1.6979             |
| 3289 | 434259  | UNK           | NA                                                                    | 0               | 2               | 3                | -1.69764            |

Candidates for positive regulators of normal growth (Fisher's)

| Rank | entrez# | Gene Symbol | Gene name                                                                  | enriched shRNAs | depleted shRNAs | no change shRNAs | average Fold Change |
|------|---------|-------------|----------------------------------------------------------------------------|-----------------|-----------------|------------------|---------------------|
| 3290 | 75604   | Tm4sf5      | transmembrane 4 superfamily member 5                                       | 0               | 2               | 2                | -1.69711            |
| 3291 | 27494   | Amot        | angiomin                                                                   | 0               | 2               | 3                | -1.69694            |
| 3292 | 75770   | Brsk2       | BR serine/threonine kinase 2                                               | 0               | 2               | 3                | -1.69689            |
| 3293 | 68126   | Fahd2a      | fumarylacetoacetate hydrolase domain containing 2A                         | 0               | 2               | 3                | -1.69683            |
| 3294 | 14063   | F2r1        | coagulation factor II (thrombin) receptor-like 1                           | 0               | 2               | 3                | -1.69625            |
| 3295 | 99237   | Tm9sf4      | transmembrane 9 superfamily protein member 4                               | 0               | 2               | 2                | -1.69612            |
| 3296 | 65972   | Ifi30       | interferon gamma inducible protein 30                                      | 0               | 2               | 3                | -1.69608            |
| 3297 | 17203   | Mc5r        | melanocortin 5 receptor                                                    | 0               | 2               | 3                | -1.69588            |
| 3298 | 320878  | Mical2      | microtubule associated monooxygenase, calponin and LIM domain containing 2 | 0               | 2               | 3                | -1.69584            |
| 3299 | 328457  | UNK         | NA                                                                         | 0               | 2               | 3                | -1.69542            |
| 3300 | 12337   | Capn5       | calpain 5                                                                  | 0               | 2               | 3                | -1.69531            |
| 3301 | 212225  | 4930509O22  | sperm motility kinase W                                                    | 0               | 2               | 3                | -1.69515            |
| 3302 | 15565   | Htr6        | 5-hydroxytryptamine (serotonin) receptor 6                                 | 0               | 2               | 3                | -1.69511            |
| 3303 | 12352   | Car5a       | carbonic anhydrase 5a, mitochondrial                                       | 0               | 2               | 3                | -1.69483            |
| 3304 | 74435   | Lrrc44      | leucine-rich repeats and IQ motif containing 3                             | 0               | 2               | 3                | -1.69444            |
| 3305 | 18365   | Olf64       | olfactory receptor 65                                                      | 0               | 2               | 2                | -1.69439            |
| 3306 | 236643  | Syt5        | synaptotagmin-like 5                                                       | 0               | 2               | 3                | -1.69398            |
| 3307 | 217069  | Trim25      | tripartite motif-containing 25                                             | 0               | 2               | 3                | -1.69241            |
| 3308 | 269604  | Gpr157      | G protein-coupled receptor 157                                             | 0               | 2               | 3                | -1.69211            |
| 3309 | 75747   | Sesn3       | sestrin 3                                                                  | 0               | 2               | 3                | -1.69166            |
| 3310 | 258446  | Olf1231     | olfactory receptor 1231                                                    | 0               | 2               | 3                | -1.69145            |
| 3311 | 333329  | Cngb1b      | cyclic nucleotide gated channel beta 1                                     | 0               | 2               | 3                | -1.69142            |
| 3312 | 66271   | Tmem126a    | transmembrane protein 126A                                                 | 0               | 2               | 3                | -1.69134            |
| 3313 | 16163   | Il13        | interleukin 13                                                             | 0               | 2               | 3                | -1.69116            |
| 3314 | 20742   | Spnb2       | spectrin beta 2                                                            | 0               | 2               | 3                | -1.69115            |
| 3315 | 241201  | Cdh7        | cadherin 7, type 2                                                         | 0               | 2               | 3                | -1.68989            |
| 3316 | 13508   | Dscam       | Down syndrome cell adhesion molecule                                       | 0               | 2               | 3                | -1.68982            |
| 3317 | 108903  | Tbcd        | tubulin-specific chaperone d                                               | 0               | 2               | 3                | -1.68955            |
| 3318 | 269587  | Epb4.1      | erythrocyte protein band 4.1                                               | 0               | 2               | 3                | -1.68903            |
| 3319 | 382571  | Kcnf1       | potassium voltage-gated channel, subfamily F, member 1                     | 0               | 2               | 3                | -1.68903            |
| 3320 | 76441   | Daam2       | dishevelled associated activator of morphogenesis 2                        | 0               | 2               | 3                | -1.68893            |
| 3321 | 13522   | Adam28      | a disintegrin and metallopeptidase domain 28                               | 0               | 2               | 3                | -1.68832            |
| 3322 | 66044   | Hars2       | D-tyrosyl-tRNA deacylase 1 homolog (S. cerevisiae)                         | 0               | 2               | 3                | -1.68829            |
| 3323 | 60595   | Actn4       | actinin alpha 4                                                            | 0               | 2               | 3                | -1.68796            |
| 3324 | 108100  | Baiap2      | brain-specific angiogenesis inhibitor 1-associated protein 2               | 0               | 2               | 3                | -1.68766            |
| 3325 | 19725   | Rfx2        | regulatory factor X, 2 (influences HLA class II expression)                | 0               | 2               | 3                | -1.68743            |
| 3326 | 13360   | Dhcr7       | 7-dehydrocholesterol reductase                                             | 0               | 2               | 3                | -1.68739            |

Candidates for positive regulators of normal growth (Fisher's)

| Rank | entrez# | Gene Symbol   | Gene name                                                                                             | enriched shRNAs | depleted shRNAs | no change shRNAs | average Fold Change |
|------|---------|---------------|-------------------------------------------------------------------------------------------------------|-----------------|-----------------|------------------|---------------------|
| 3327 | 228875  | Slc35c2       | solute carrier family 35, member C2                                                                   | 0               | 2               | 3                | -1.68687            |
| 3328 | 54199   | Ccr12         | chemokine (C-C motif) receptor-like 2                                                                 | 0               | 2               | 3                | -1.68635            |
| 3329 | 67487   | Dhx40         | DEAH (Asp-Glu-Ala-His) box polypeptide 40                                                             | 0               | 2               | 3                | -1.68598            |
| 3330 | 66070   | 0610040D20Rik | CWC15 homolog (S. cerevisiae)                                                                         | 0               | 2               | 3                | -1.68402            |
| 3331 | 17058   | Klrb1b        | NA                                                                                                    | 0               | 2               | 3                | -1.68376            |
| 3332 | 18715   | Pim2          | proviral integration site 2                                                                           | 0               | 2               | 3                | -1.68355            |
| 3333 | 67313   | 5730559C18Rik | RIKEN cDNA 5730559C18 gene                                                                            | 0               | 2               | 3                | -1.68348            |
| 3334 | 56213   | Htra1         | HtrA serine peptidase 1                                                                               | 0               | 2               | 3                | -1.68305            |
| 3335 | 64176   | Sv2b          | synaptic vesicle glycoprotein 2 b                                                                     | 0               | 2               | 3                | -1.68111            |
| 3336 | 83554   | Fstl3         | folliculin-like 3                                                                                     | 0               | 2               | 2                | -1.68025            |
| 3337 | 12869   | Cox8b         | cytochrome c oxidase, subunit VIIIb                                                                   | 0               | 2               | 3                | -1.68013            |
| 3338 | 258689  | Olfrl1466     | olfactory receptor 1466                                                                               | 0               | 2               | 2                | -1.67967            |
| 3339 | 93716   | Pcdhga8       | protocadherin gamma subfamily A, 8                                                                    | 0               | 2               | 3                | -1.67937            |
| 3340 | 70369   | Bag5          | BCL2-associated athanogene 5                                                                          | 0               | 2               | 3                | -1.67931            |
| 3341 | 71591   | Zfp251        | zinc finger protein 251                                                                               | 0               | 2               | 2                | -1.67864            |
| 3342 | 21756   | Tesp2         | protease, serine, 40                                                                                  | 0               | 2               | 3                | -1.67827            |
| 3343 | 66587   | Fastk         | Fas-activated serine/threonine kinase                                                                 | 0               | 2               | 3                | -1.67811            |
| 3344 | 26446   | Psmb3         | proteasome (prosome, macropain) subunit, beta type 3                                                  | 0               | 2               | 3                | -1.67797            |
| 3345 | 213539  | Bag2          | BCL2-associated athanogene 2                                                                          | 0               | 2               | 3                | -1.67774            |
| 3346 | 546214  | LOC546214     | NA                                                                                                    | 0               | 2               | 3                | -1.67727            |
| 3347 | 76478   | 2410004L22Rik | 4HAUS augmin-like complex, subunit 8                                                                  | 0               | 2               | 2                | -1.67656            |
| 3348 | 14598   | Ggt1          | gamma-glutamyltransferase 1                                                                           | 0               | 2               | 3                | -1.6758             |
| 3349 | 56835   | Ctsr          | cathepsin R                                                                                           | 0               | 2               | 3                | -1.67547            |
| 3350 | 14466   | Gba           | glucosidase, beta, acid                                                                               | 0               | 2               | 2                | -1.67542            |
| 3351 | 30943   | Tmprss8       | protease, serine, 30                                                                                  | 0               | 2               | 3                | -1.67463            |
| 3352 | 17858   | Mx2           | myxovirus (influenza virus) resistance 2                                                              | 0               | 2               | 3                | -1.67453            |
| 3353 | 69085   | Zcchc9        | zinc finger, CCHC domain containing 9                                                                 | 0               | 2               | 3                | -1.67446            |
| 3354 | 15976   | Ifnar2        | interferon (alpha and beta) receptor 2                                                                | 0               | 2               | 3                | -1.67431            |
| 3355 | 50930   | Tnfsf14       | tumor necrosis factor (ligand) superfamily, member 14                                                 | 0               | 2               | 3                | -1.6739             |
| 3356 | 19131   | Prh1          | proline rich protein HaellI subfamily 1                                                               | 0               | 2               | 2                | -1.67359            |
| 3357 | 14248   | Fliih         | flightless I homolog (Drosophila)                                                                     | 0               | 2               | 3                | -1.67344            |
| 3358 | 246694  | Hps5          | Hermansky-Pudlak syndrome 5 homolog (human)                                                           | 0               | 2               | 2                | -1.67334            |
| 3359 | 17933   | Myt1l         | myelin transcription factor 1-like                                                                    | 0               | 2               | 3                | -1.6732             |
| 3360 | 98365   | Slamf9        | SLAM family member 9                                                                                  | 0               | 2               | 3                | -1.6731             |
| 3361 | 72562   | Pcbd2         | pterin 4 alpha carbinolamine dehydratase/dimerization cofactor of hepatocyte nuclear factor 1 alpha ( | 0               | 2               | 3                | -1.67302            |
| 3362 | 384444  | UNK           | NA                                                                                                    | 0               | 2               | 3                | -1.67215            |
| 3363 | 11816   | Apoe          | apolipoprotein E                                                                                      | 0               | 2               | 3                | -1.67183            |

Candidates for positive regulators of normal growth (Fisher's)

| Rank | entrez# | Gene Symbol   | Gene name                                                      | enriched shRNAs | depleted shRNAs | no change shRNAs | average Fold Change |
|------|---------|---------------|----------------------------------------------------------------|-----------------|-----------------|------------------|---------------------|
| 3364 | 171191  | V1rc18        | vomeronasal 1 receptor 24                                      | 0               | 2               | 3                | -1.67176            |
| 3365 | 20717   | Serpina3m     | serine (or cysteine) peptidase inhibitor, clade A, member 3M   | 0               | 2               | 3                | -1.67128            |
| 3366 | 67477   | 1300007F04Rik | abhydrolase domain containing 15                               | 0               | 2               | 2                | -1.67116            |
| 3367 | 24068   | Sra1          | steroid receptor RNA activator 1                               | 0               | 2               | 1                | -1.67057            |
| 3368 | 52245   | Commd2        | COMM domain containing 2                                       | 0               | 2               | 3                | -1.67054            |
| 3369 | 64139   | Ctsm          | cathepsin M                                                    | 0               | 2               | 3                | -1.67009            |
| 3370 | 11534   | Adk           | adenosine kinase                                               | 0               | 2               | 2                | -1.66984            |
| 3371 | 13998   | Fgd6          | FYVE, RhoGEF and PH domain containing 6                        | 0               | 2               | 3                | -1.66976            |
| 3372 | 258756  | Olf414        | olfactory receptor 414                                         | 0               | 2               | 2                | -1.66917            |
| 3373 | 433752  | AA415398      | expressed sequence AA415398                                    | 0               | 2               | 3                | -1.66866            |
| 3374 | 107971  | Frs3          | fibroblast growth factor receptor substrate 3                  | 0               | 2               | 3                | -1.66851            |
| 3375 | 433545  | UNK           | NA                                                             | 0               | 2               | 3                | -1.66825            |
| 3376 | 59050   | 5730427N09Rik | NSA2 ribosome biogenesis homolog (S. cerevisiae)               | 0               | 2               | 3                | -1.66762            |
| 3377 | 12531   | Cdc25b        | cell division cycle 25 homolog B (S. pombe)                    | 0               | 2               | 3                | -1.66726            |
| 3378 | 66979   | Pole4         | polymerase (DNA-directed), epsilon 4 (p12 subunit)             | 0               | 2               | 3                | -1.66692            |
| 3379 | 20298   | Ccl21a        | NA                                                             | 0               | 2               | 3                | -1.66644            |
| 3380 | 434405  | LOC434405     | NA                                                             | 0               | 2               | 3                | -1.66643            |
| 3381 | 12642   | Ch25h         | cholesterol 25-hydroxylase                                     | 0               | 2               | 3                | -1.66639            |
| 3382 | 66385   | Ppp1r7        | protein phosphatase 1, regulatory (inhibitor) subunit 7        | 0               | 2               | 3                | -1.66629            |
| 3383 | 331392  | LOC331392     | nucleolar and coiled-body phosphoprotein 1 pseudogene          | 0               | 2               | 3                | -1.66611            |
| 3384 | 102334  | Ankrd10       | ankyrin repeat domain 10                                       | 0               | 2               | 3                | -1.6659             |
| 3385 | 279766  | Rhbdd3        | rhomboid domain containing 3                                   | 0               | 2               | 3                | -1.66569            |
| 3386 | 18114   | Nnp1          | ribosomal RNA processing 1 homolog (S. cerevisiae)             | 0               | 2               | 3                | -1.66528            |
| 3387 | 259125  | Olf644        | olfactory receptor 644                                         | 0               | 2               | 2                | -1.66474            |
| 3388 | 338374  | Il28          | interleukin 28B                                                | 0               | 2               | 3                | -1.66441            |
| 3389 | 433292  | Nms           | neuromedin S                                                   | 0               | 2               | 3                | -1.66425            |
| 3390 | 50701   | Ela2          | elastase, neutrophil expressed                                 | 0               | 2               | 3                | -1.66424            |
| 3391 | 12321   | Calu          | calumenin                                                      | 0               | 2               | 3                | -1.66411            |
| 3392 | 93722   | Pcdhga10      | protocadherin gamma subfamily A, 10                            | 0               | 2               | 3                | -1.66368            |
| 3393 | 26914   | H2afy         | H2A histone family, member Y                                   | 0               | 2               | 3                | -1.6636             |
| 3394 | 30055   | Timm13        | translocase of inner mitochondrial membrane 13 homolog (yeast) | 0               | 2               | 2                | -1.66355            |
| 3395 | 114566  | Krt2-20       | keratin 82                                                     | 0               | 2               | 3                | -1.66259            |
| 3396 | 17202   | Mc4r          | melanocortin 4 receptor                                        | 0               | 2               | 3                | -1.66211            |
| 3397 | 20674   | Sox2          | SRY-box containing gene 2                                      | 0               | 2               | 3                | -1.66154            |
| 3398 | 23871   | Ets1          | E26 avian leukemia oncogene 1, 5' domain                       | 0               | 2               | 3                | -1.6615             |
| 3399 | 106393  | Srl           | sarcalumenin                                                   | 0               | 2               | 3                | -1.66139            |
| 3400 | 14163   | Fgd1          | FYVE, RhoGEF and PH domain containing 1                        | 0               | 2               | 3                | -1.65967            |

Candidates for positive regulators of normal growth (Fisher's)

| Rank | entrez# | Gene Symbol   | Gene name                                                                           | enriched shRNAs | depleted shRNAs | no change shRNAs | average Fold Change |
|------|---------|---------------|-------------------------------------------------------------------------------------|-----------------|-----------------|------------------|---------------------|
| 3401 | 54519   | Apbb1ip       | amyloid beta (A4) precursor protein-binding, family B, member 1 interacting protein | 0               | 2               | 3                | -1.65919            |
| 3402 | 54326   | Elovl2        | elongation of very long chain fatty acids (FEN1/Elo2, SUR4/Elo3, yeast)-like 2      | 0               | 2               | 3                | -1.65913            |
| 3403 | 69008   | Cab39l        | calcium binding protein 39-like                                                     | 0               | 2               | 3                | -1.65912            |
| 3404 | 14421   | B4galnt1      | beta-1,4-N-acetyl-galactosaminyl transferase 1                                      | 0               | 2               | 3                | -1.65899            |
| 3405 | 12477   | Ctla4         | cytotoxic T-lymphocyte-associated protein 4                                         | 0               | 2               | 3                | -1.65898            |
| 3406 | 319188  | Hist1h2bp     | histone cluster 1, H2bp                                                             | 0               | 2               | 3                | -1.65848            |
| 3407 | 18453   | P4hb          | prolyl 4-hydroxylase, beta polypeptide                                              | 0               | 2               | 3                | -1.65845            |
| 3408 | 69639   | Exosc8        | exosome component 8                                                                 | 0               | 2               | 3                | -1.658              |
| 3409 | 65116   | Prrg2         | proline-rich Gla (G-carboxyglutamic acid) polypeptide 2                             | 0               | 2               | 3                | -1.65584            |
| 3410 | 66307   | Isoc1         | isochorismatase domain containing 1                                                 | 0               | 2               | 3                | -1.65567            |
| 3411 | 78242   | 9230117E20Rik | serine peptidase inhibitor, Kazal type 11                                           | 0               | 2               | 3                | -1.65558            |
| 3412 | 22019   | Tpp2          | tripeptidyl peptidase II                                                            | 0               | 2               | 3                | -1.65551            |
| 3413 | 12539   | Cdc37         | cell division cycle 37 homolog (S. cerevisiae)                                      | 0               | 2               | 3                | -1.6553             |
| 3414 | 14252   | Flot2         | flotillin 2                                                                         | 0               | 2               | 3                | -1.65419            |
| 3415 | 12728   | Clcn5         | chloride channel 5                                                                  | 0               | 2               | 3                | -1.654              |
| 3416 | 406219  | Krt2-25       | keratin 83                                                                          | 0               | 2               | 3                | -1.65395            |
| 3417 | 56792   | AI586015      | signal transducing adaptor family member 1                                          | 0               | 2               | 3                | -1.65394            |
| 3418 | 19038   | Ppic          | peptidylprolyl isomerase C                                                          | 0               | 2               | 3                | -1.65332            |
| 3419 | 23857   | Dmtf1         | cyclin D binding myb-like transcription factor 1                                    | 0               | 2               | 3                | -1.65329            |
| 3420 | 22171   | Tyms          | thymidylate synthase                                                                | 0               | 2               | 3                | -1.65327            |
| 3421 | 19769   | Rit1          | Ras-like without CAAX 1                                                             | 0               | 2               | 3                | -1.65312            |
| 3422 | 381993  | UNK           | NA                                                                                  | 0               | 2               | 3                | -1.65285            |
| 3423 | 15483   | Hsd11b1       | hydroxysteroid 11-beta dehydrogenase 1                                              | 0               | 2               | 3                | -1.65282            |
| 3424 | 22367   | Vrk1          | vaccinia related kinase 1                                                           | 0               | 2               | 3                | -1.6526             |
| 3425 | 71601   | Ceacam20      | carcinoembryonic antigen-related cell adhesion molecule 20                          | 0               | 2               | 2                | -1.65227            |
| 3426 | 18145   | Npc1          | Niemann Pick type C1                                                                | 0               | 2               | 3                | -1.65153            |
| 3427 | 83409   | Mapbpip       | late endosomal/lysosomal adaptor, MAPK and MTOR activator 2                         | 0               | 2               | 2                | -1.65148            |
| 3428 | 12982   | Csf2ra        | colony stimulating factor 2 receptor, alpha, low-affinity (granulocyte-macrophage)  | 0               | 2               | 3                | -1.65132            |
| 3429 | 70584   | Pak4          | p21 protein (Cdc42/Rac)-activated kinase 4                                          | 0               | 2               | 3                | -1.65065            |
| 3430 | 14183   | Fgfr2         | fibroblast growth factor receptor 2                                                 | 0               | 2               | 3                | -1.65056            |
| 3431 | 436255  | UNK           | NA                                                                                  | 0               | 2               | 3                | -1.64994            |
| 3432 | 14167   | Fgf12         | fibroblast growth factor 12                                                         | 0               | 2               | 3                | -1.64982            |
| 3433 | 21673   | Dntt          | deoxynucleotidyltransferase, terminal                                               | 0               | 2               | 3                | -1.64981            |
| 3434 | 71481   | Alpk1         | alpha-kinase 1                                                                      | 0               | 2               | 3                | -1.64883            |
| 3435 | 67963   | Npc2          | Niemann Pick type C2                                                                | 0               | 2               | 3                | -1.64866            |
| 3436 | 20402   | Zfp106        | zinc finger protein 106                                                             | 0               | 2               | 3                | -1.64831            |
| 3437 | 67619   | Nob1          | NIN1/RPN12 binding protein 1 homolog (S. cerevisiae)                                | 0               | 2               | 3                | -1.64804            |



Candidates for positive regulators of normal growth (Fisher's)

| Rank | entrez# | Gene Symbol   | Gene name                                                                             | enriched shRNAs | depleted shRNAs | no change shRNAs | average Fold Change |
|------|---------|---------------|---------------------------------------------------------------------------------------|-----------------|-----------------|------------------|---------------------|
| 3438 | 235312  | C1qtnf5       | C1q and tumor necrosis factor related protein 5                                       | 0               | 2               | 3                | -1.64769            |
| 3439 | 107684  | Coro2a        | coronin, actin binding protein 2A                                                     | 0               | 2               | 3                | -1.64742            |
| 3440 | 64818   | Krt2-19       | keratin 81                                                                            | 0               | 2               | 3                | -1.64736            |
| 3441 | 399591  | 4930488E11Rik | thymosin beta 15b like                                                                | 0               | 2               | 2                | -1.64734            |
| 3442 | 78797   | Ndor1         | NADPH dependent diflavin oxidoreductase 1                                             | 0               | 2               | 2                | -1.64732            |
| 3443 | 19124   | Procr         | protein C receptor, endothelial                                                       | 0               | 2               | 3                | -1.64722            |
| 3444 | 74600   | Mrp147        | mitochondrial ribosomal protein L47                                                   | 0               | 2               | 3                | -1.64708            |
| 3445 | 13723   | Emb           | embigin                                                                               | 0               | 2               | 3                | -1.64689            |
| 3446 | 19729   | Rag1ap1       | solute carrier family 50 (sugar transporter), member 1                                | 0               | 2               | 3                | -1.6468             |
| 3447 | 67489   | Ap4b1         | adaptor-related protein complex AP-4, beta 1                                          | 0               | 2               | 3                | -1.64616            |
| 3448 | 67579   | Cpeb4         | cytoplasmic polyadenylation element binding protein 4                                 | 0               | 2               | 3                | -1.64613            |
| 3449 | 218271  | B4galt7       | xylosylprotein beta1,4-galactosyltransferase, polypeptide 7 (galactosyltransferase I) | 0               | 2               | 3                | -1.64597            |
| 3450 | 213053  | Slc39a14      | solute carrier family 39 (zinc transporter), member 14                                | 0               | 2               | 3                | -1.6455             |
| 3451 | 76183   | Bruno16       | CUGBP, Elav-like family member 6                                                      | 0               | 2               | 3                | -1.64534            |
| 3452 | 70385   | Ccdc99        | coiled-coil domain containing 99                                                      | 0               | 2               | 3                | -1.64525            |
| 3453 | 20843   | Stag2         | stromal antigen 2                                                                     | 0               | 2               | 3                | -1.6452             |
| 3454 | 18575   | Pde1c         | phosphodiesterase 1C                                                                  | 0               | 2               | 3                | -1.64517            |
| 3455 | 242773  | Slc45a1       | solute carrier family 45, member 1                                                    | 0               | 2               | 3                | -1.64507            |
| 3456 | 382038  | AK122209      | URB2 ribosome biogenesis 2 homolog (S. cerevisiae)                                    | 0               | 2               | 3                | -1.64464            |
| 3457 | 106039  | Gga1          | golgi associated, gamma adaptin ear containing, ARF binding protein 1                 | 0               | 2               | 3                | -1.64456            |
| 3458 | 80752   | BC004044      | family with sequence similarity 20, member C                                          | 0               | 2               | 3                | -1.64442            |
| 3459 | 434008  | LOC434008     | predicted gene 5567                                                                   | 0               | 2               | 2                | -1.64348            |
| 3460 | 55946   | Ap3m1         | adaptor-related protein complex 3, mu 1 subunit                                       | 0               | 2               | 3                | -1.64298            |
| 3461 | 229949  | Ak5           | adenylate kinase 5                                                                    | 0               | 2               | 3                | -1.64273            |
| 3462 | 14569   | Gdi2          | guanosine diphosphate (GDP) dissociation inhibitor 2                                  | 0               | 2               | 3                | -1.64221            |
| 3463 | 26910   | Figla         | folliculogenesis specific basic helix-loop-helix                                      | 0               | 2               | 3                | -1.64183            |
| 3464 | 236223  | UNK           | NA                                                                                    | 0               | 2               | 3                | -1.64158            |
| 3465 | 93747   | Echs1         | enoyl Coenzyme A hydratase, short chain, 1, mitochondrial                             | 0               | 2               | 3                | -1.64157            |
| 3466 | 98711   | Rdh10         | retinol dehydrogenase 10 (all-trans)                                                  | 0               | 2               | 3                | -1.64148            |
| 3467 | 227059  | Slc39a10      | solute carrier family 39 (zinc transporter), member 10                                | 0               | 2               | 3                | -1.64147            |
| 3468 | 97848   | Serpinh6c     | serine (or cysteine) peptidase inhibitor, clade B, member 6c                          | 0               | 2               | 3                | -1.64102            |
| 3469 | 66226   | Trappc2       | trafficking protein particle complex 2                                                | 0               | 2               | 3                | -1.64086            |
| 3470 | 19294   | Pvrl2         | poliovirus receptor-related 2                                                         | 0               | 2               | 3                | -1.6406             |
| 3471 | 320508  | Cachd1        | cache domain containing 1                                                             | 0               | 2               | 2                | -1.64054            |
| 3472 | 13846   | Ephb4         | Eph receptor B4                                                                       | 0               | 2               | 3                | -1.63974            |
| 3473 | 107586  | Ovol2         | ovo-like 2 (Drosophila)                                                               | 0               | 2               | 3                | -1.63945            |
| 3474 | 216453  | Rdhs          | retinol dehydrogenase 19                                                              | 0               | 2               | 3                | -1.63929            |

Candidates for positive regulators of normal growth (Fisher's)

| Rank | entrez# | Gene Symbol   | Gene name                                                                 | enriched shRNAs | depleted shRNAs | no change shRNAs | average Fold Change |
|------|---------|---------------|---------------------------------------------------------------------------|-----------------|-----------------|------------------|---------------------|
| 3475 | 54140   | Avpr1a        | arginine vasopressin receptor 1A                                          | 0               | 2               | 3                | -1.63858            |
| 3476 | 66147   | Necap2        | NECAP endocytosis associated 2                                            | 0               | 2               | 3                | -1.63857            |
| 3477 | 229958  | UNK           | NA                                                                        | 0               | 2               | 3                | -1.63849            |
| 3478 | 14726   | Pdpn          | podoplanin                                                                | 0               | 2               | 2                | -1.63813            |
| 3479 | 435262  | UNK           | NA                                                                        | 0               | 2               | 3                | -1.63786            |
| 3480 | 27217   | Mixl1         | Mix1 homeobox-like 1 ( <i>Xenopus laevis</i> )                            | 0               | 2               | 3                | -1.63744            |
| 3481 | 54631   | Nphs1         | nephrosis 1 homolog, nephrin (human)                                      | 0               | 2               | 3                | -1.63665            |
| 3482 | 67707   | Mrpl24        | mitochondrial ribosomal protein L24                                       | 0               | 2               | 3                | -1.63658            |
| 3483 | 59047   | Pnkp          | polynucleotide kinase 3'-phosphatase                                      | 0               | 2               | 3                | -1.63613            |
| 3484 | 14205   | Figf          | c-fos induced growth factor                                               | 0               | 2               | 3                | -1.63583            |
| 3485 | 22637   | Zap70         | zeta-chain (TCR) associated protein kinase                                | 0               | 2               | 3                | -1.63565            |
| 3486 | 225471  | Ticam2        | toll-like receptor adaptor molecule 2                                     | 0               | 2               | 3                | -1.63477            |
| 3487 | 20729   | Spin          | spindlin 1                                                                | 0               | 2               | 3                | -1.6345             |
| 3488 | 78369   | Icam4         | intercellular adhesion molecule 4, Landsteiner-Wiener blood group         | 0               | 2               | 3                | -1.63424            |
| 3489 | 331623  | AK122525      | BEN domain containing 3                                                   | 0               | 2               | 3                | -1.63418            |
| 3490 | 13367   | Diap1         | diaphanous homolog 1 ( <i>Drosophila</i> )                                | 0               | 2               | 3                | -1.63343            |
| 3491 | 57751   | Rnf25         | ring finger protein 25                                                    | 0               | 2               | 2                | -1.63239            |
| 3492 | 14842   | Gsh1          | GS homeobox 1                                                             | 0               | 2               | 2                | -1.63202            |
| 3493 | 19349   | Rab7          | RAB7, member RAS oncogene family                                          | 0               | 2               | 3                | -1.63168            |
| 3494 | 18100   | Mrpl40        | mitochondrial ribosomal protein L40                                       | 0               | 2               | 2                | -1.63078            |
| 3495 | 74890   | 4930438O03Rik | MORN repeat containing 3                                                  | 0               | 2               | 3                | -1.6306             |
| 3496 | 74450   | Pank2         | pantothenate kinase 2                                                     | 0               | 2               | 3                | -1.63009            |
| 3497 | 70439   | Taf15         | TAF15 RNA polymerase II, TATA box binding protein (TBP)-associated factor | 0               | 2               | 3                | -1.62996            |
| 3498 | 226977  | Actr1b        | ARP1 actin-related protein 1 homolog B, cetractin beta (yeast)            | 0               | 2               | 3                | -1.62951            |
| 3499 | 78906   | 9130017N09Rik | RIKEN cDNA 9130017N09 gene                                                | 0               | 2               | 3                | -1.62939            |
| 3500 | 20508   | Slc18a3       | solute carrier family 18 (vesicular monoamine), member 3                  | 0               | 2               | 3                | -1.62932            |
| 3501 | 72185   | Dynd1         | dysbindin (dystrobrevin binding protein 1) domain containing 1            | 0               | 2               | 3                | -1.62922            |
| 3502 | 11843   | Arf4          | ADP-ribosylation factor 4                                                 | 0               | 2               | 3                | -1.62877            |
| 3503 | 67717   | Lipf          | lipase, gastric                                                           | 0               | 2               | 2                | -1.62837            |
| 3504 | 382039  | UNK           | NA                                                                        | 0               | 2               | 3                | -1.62806            |
| 3505 | 258663  | Olfir739      | olfactory receptor 739                                                    | 0               | 2               | 2                | -1.62795            |
| 3506 | 225341  | Lims2         | LIM and senescent cell antigen like domains 2                             | 0               | 2               | 3                | -1.62781            |
| 3507 | 74356   | 4931428F04Rik | RIKEN cDNA 4931428F04 gene                                                | 0               | 2               | 2                | -1.62774            |
| 3508 | 21809   | Tgfb3         | transforming growth factor, beta 3                                        | 0               | 2               | 3                | -1.62761            |
| 3509 | 103694  | Tmed4         | transmembrane emp24 protein transport domain containing 4                 | 0               | 2               | 3                | -1.62759            |
| 3510 | 320707  | Atp2b3        | ATPase, Ca <sup>++</sup> transporting, plasma membrane 3                  | 0               | 2               | 3                | -1.62725            |
| 3511 | 26359   | Anxa10        | annexin A10                                                               | 0               | 2               | 3                | -1.62721            |

Candidates for positive regulators of normal growth (Fisher's)

| Rank | entrez# | Gene Symbol   | Gene name                                                                                    | enriched shRNAs | depleted shRNAs | no change shRNAs | average Fold Change |
|------|---------|---------------|----------------------------------------------------------------------------------------------|-----------------|-----------------|------------------|---------------------|
| 3512 | 57271   | Olf1509       | olfactory receptor 1509                                                                      | 0               | 2               | 3                | -1.62694            |
| 3513 | 214899  | Jarid1a       | lysine (K)-specific demethylase 5A                                                           | 0               | 2               | 3                | -1.62674            |
| 3514 | 319163  | Hist1h2aa     | histone cluster 1, H2aa                                                                      | 0               | 2               | 3                | -1.62617            |
| 3515 | 217057  | Pthr2         | peptidyl-tRNA hydrolase 2                                                                    | 0               | 2               | 3                | -1.62612            |
| 3516 | 225865  | Catsper1      | cation channel, sperm associated 1                                                           | 0               | 2               | 3                | -1.62591            |
| 3517 | 541610  | Trcg1         | taste receptor cell gene 1                                                                   | 0               | 2               | 2                | -1.62587            |
| 3518 | 21453   | Tcof1         | Treacher Collins Franceschetti syndrome 1, homolog                                           | 0               | 2               | 3                | -1.62576            |
| 3519 | 17127   | Smad3         | MAD homolog 3 (Drosophila)                                                                   | 0               | 2               | 3                | -1.62439            |
| 3520 | 16597   | Klf12         | Kruppel-like factor 12                                                                       | 0               | 2               | 3                | -1.62429            |
| 3521 | 14172   | Fgf18         | fibroblast growth factor 18                                                                  | 0               | 2               | 3                | -1.6241             |
| 3522 | 67738   | Ppid          | peptidylprolyl isomerase D (cyclophilin D)                                                   | 0               | 2               | 3                | -1.62385            |
| 3523 | 69834   | 1810048P08Rik | RAB43, member RAS oncogene family                                                            | 0               | 2               | 3                | -1.62355            |
| 3524 | 12310   | Calca         | calcitonin/calcitonin-related polypeptide, alpha                                             | 0               | 2               | 2                | -1.6231             |
| 3525 | 319180  | Hist1h2bf     | histone cluster 1, H2bf                                                                      | 0               | 2               | 3                | -1.62252            |
| 3526 | 12972   | Cryz          | crystallin, zeta                                                                             | 0               | 2               | 3                | -1.62178            |
| 3527 | 13445   | Cdk2ap1       | CDK2 (cyclin-dependent kinase 2)-associated protein 1                                        | 0               | 2               | 3                | -1.62164            |
| 3528 | 213068  | Tmem71        | transmembrane protein 71                                                                     | 0               | 2               | 2                | -1.62154            |
| 3529 | 67859   | 2310002J15Rik | RIKEN cDNA 2310002J15 gene                                                                   | 0               | 2               | 2                | -1.62139            |
| 3530 | 69232   | 2610028H07Rik | glutamine-rich 1                                                                             | 0               | 2               | 3                | -1.62091            |
| 3531 | 434767  | UNK           | NA                                                                                           | 0               | 2               | 3                | -1.62048            |
| 3532 | 17993   | Ndufs4        | NADH dehydrogenase (ubiquinone) Fe-S protein 4                                               | 0               | 2               | 3                | -1.61953            |
| 3533 | 104349  | Zfp119        | zinc finger protein 119a                                                                     | 0               | 2               | 3                | -1.61869            |
| 3534 | 50501   | Prok2         | prokineticin 2                                                                               | 0               | 2               | 3                | -1.61838            |
| 3535 | 208258  | Ankrd33       | ankyrin repeat domain 33                                                                     | 0               | 2               | 3                | -1.61818            |
| 3536 | 278672  | 1110051B16Rik | double homeobox B-like                                                                       | 0               | 2               | 3                | -1.61752            |
| 3537 | 69217   | Plekha4       | pleckstrin homology domain containing, family A (phosphoinositide binding specific) member 4 | 0               | 2               | 3                | -1.61732            |
| 3538 | 17385   | Mmp11         | matrix metalloproteinase 11                                                                  | 0               | 2               | 2                | -1.61729            |
| 3539 | 94226   | Edg8          | sphingosine-1-phosphate receptor 5                                                           | 0               | 2               | 1                | -1.61679            |
| 3540 | 12785   | Cnbp          | cellular nucleic acid binding protein                                                        | 0               | 2               | 3                | -1.61555            |
| 3541 | 66603   | Sip1          | survival of motor neuron protein interacting protein 1                                       | 0               | 2               | 3                | -1.61538            |
| 3542 | 435997  | UNK           | NA                                                                                           | 0               | 2               | 3                | -1.61499            |
| 3543 | 77318   | C030011J08Rik | ankyrin repeat domain 55                                                                     | 0               | 2               | 3                | -1.61489            |
| 3544 | 215512  | 5730593F17Rik | family with sequence similarity 117, member A                                                | 0               | 2               | 3                | -1.61479            |
| 3545 | 94279   | Sfxn2         | sideroflexin 2                                                                               | 0               | 2               | 3                | -1.61395            |
| 3546 | 28253   | Slco1b2       | solute carrier organic anion transporter family, member 1b2                                  | 0               | 2               | 3                | -1.61382            |
| 3547 | 66866   | Nhlrc2        | NHL repeat containing 2                                                                      | 0               | 2               | 2                | -1.61335            |
| 3548 | 258583  | Olf1085       | olfactory receptor 1085                                                                      | 0               | 2               | 3                | -1.61337            |

Candidates for positive regulators of normal growth (Fisher's)

| Rank | entrez# | Gene Symbol   | Gene name                                                                             | enriched shRNAs | depleted shRNAs | no change shRNAs | average Fold Change |
|------|---------|---------------|---------------------------------------------------------------------------------------|-----------------|-----------------|------------------|---------------------|
| 3549 | 68342   | Ndufb10       | NADH dehydrogenase (ubiquinone) 1 beta subcomplex, 10                                 | 0               | 2               | 3                | -1.61321            |
| 3550 | 21647   | Tcte3         | t-complex-associated testis expressed 3                                               | 0               | 2               | 3                | -1.61289            |
| 3551 | 12721   | Coro1a        | coronin, actin binding protein 1A                                                     | 0               | 2               | 3                | -1.61204            |
| 3552 | 17540   | Mrvi1         | MRV integration site 1                                                                | 0               | 2               | 3                | -1.61196            |
| 3553 | 100710  | Aprin         | PDS5, regulator of cohesion maintenance, homolog B ( <i>S. cerevisiae</i> )           | 0               | 2               | 2                | -1.61176            |
| 3554 | 105670  | Rcvtb2        | regulator of chromosome condensation (RCC1) and BTB (POZ) domain containing protein 2 | 0               | 2               | 3                | -1.61157            |
| 3555 | 12314   | Calm2         | calmodulin 2                                                                          | 0               | 2               | 2                | -1.61146            |
| 3556 | 16800   | Arhgef2       | rho/rac guanine nucleotide exchange factor (GEF) 2                                    | 0               | 2               | 3                | -1.61131            |
| 3557 | 66154   | Tmem14c       | transmembrane protein 14C                                                             | 0               | 2               | 3                | -1.61114            |
| 3558 | 140559  | Igsf8         | immunoglobulin superfamily, member 8                                                  | 0               | 2               | 3                | -1.61106            |
| 3559 | 225845  | Hrasls3       | phospholipase A2, group XVI                                                           | 0               | 2               | 3                | -1.61081            |
| 3560 | 14395   | Gabra2        | gamma-aminobutyric acid (GABA) A receptor, subunit alpha 2                            | 0               | 2               | 3                | -1.61054            |
| 3561 | 16485   | Kcna1         | potassium voltage-gated channel, shaker-related subfamily, member 1                   | 0               | 2               | 3                | -1.61018            |
| 3562 | 258426  | Olf995        | olfactory receptor 995                                                                | 0               | 2               | 3                | -1.60998            |
| 3563 | 20248   | Serpinh3a     | serine (or cysteine) peptidase inhibitor, clade B (ovalbumin), member 3A              | 0               | 2               | 3                | -1.60993            |
| 3564 | 17179   | Matk          | megakaryocyte-associated tyrosine kinase                                              | 0               | 2               | 3                | -1.60984            |
| 3565 | 12643   | Chad          | chondroadherin                                                                        | 0               | 2               | 3                | -1.6091             |
| 3566 | 16768   | Lag3          | lymphocyte-activation gene 3                                                          | 0               | 2               | 3                | -1.60881            |
| 3567 | 234736  | Rfwd3         | ring finger and WD repeat domain 3                                                    | 0               | 2               | 3                | -1.60848            |
| 3568 | 14685   | Gnat1         | guanine nucleotide binding protein, alpha transducing 1                               | 0               | 2               | 3                | -1.60838            |
| 3569 | 268591  | Serpina5      | serine (or cysteine) peptidase inhibitor, clade A, member 5                           | 0               | 2               | 3                | -1.60818            |
| 3570 | 70357   | Kcnp1         | Kv channel-interacting protein 1                                                      | 0               | 2               | 3                | -1.60814            |
| 3571 | 381724  | BC061212      | cDNA sequence BC061212                                                                | 0               | 2               | 2                | -1.60782            |
| 3572 | 72018   | Fundc1        | FUN14 domain containing 1                                                             | 0               | 2               | 3                | -1.60747            |
| 3573 | 66282   | 1810029B16Rik | RIKEN cDNA 1810029B16 gene                                                            | 0               | 2               | 2                | -1.60727            |
| 3574 | 75406   | Ndufs7        | NADH dehydrogenase (ubiquinone) Fe-S protein 7                                        | 0               | 2               | 3                | -1.60717            |
| 3575 | 237859  | Ccdc55        | coiled-coil domain containing 55                                                      | 0               | 2               | 3                | -1.60705            |
| 3576 | 27395   | Mrpl15        | mitochondrial ribosomal protein L15                                                   | 0               | 2               | 3                | -1.60691            |
| 3577 | 16407   | Itgae         | integrin alpha E, epithelial-associated                                               | 0               | 2               | 3                | -1.60661            |
| 3578 | 436441  | UNK           | NA                                                                                    | 0               | 2               | 3                | -1.60654            |
| 3579 | 58222   | Rab37         | RAB37, member of RAS oncogene family                                                  | 0               | 2               | 3                | -1.60648            |
| 3580 | 76376   | Slc24a2       | solute carrier family 24 (sodium/potassium/calcium exchanger), member 2               | 0               | 2               | 3                | -1.6061             |
| 3581 | 224022  | Slc7a4        | solute carrier family 7 (cationic amino acid transporter, y+ system), member 4        | 0               | 2               | 3                | -1.60603            |
| 3582 | 74596   | Cds1          | CDP-diacylglycerol synthase 1                                                         | 0               | 2               | 3                | -1.60558            |
| 3583 | 20618   | Sncg          | synuclein, gamma                                                                      | 0               | 2               | 2                | -1.60453            |
| 3584 | 11796   | Birc3         | baculoviral IAP repeat-containing 3                                                   | 0               | 2               | 3                | -1.60266            |
| 3585 | 13191   | Dctn1         | dynactin 1                                                                            | 0               | 2               | 3                | -1.60263            |

Candidates for positive regulators of normal growth (Fisher's)

| Rank | entrez# | Gene Symbol   | Gene name                                                                               | enriched shRNAs | depleted shRNAs | no change shRNAs | average Fold Change |
|------|---------|---------------|-----------------------------------------------------------------------------------------|-----------------|-----------------|------------------|---------------------|
| 3586 | 338346  | Gpr21         | G protein-coupled receptor 21                                                           | 0               | 2               | 3                | -1.60263            |
| 3587 | 12921   | Crhr1         | corticotropin releasing hormone receptor 1                                              | 0               | 2               | 3                | -1.60226            |
| 3588 | 18676   | Phf2          | PHD finger protein 2                                                                    | 0               | 2               | 3                | -1.60155            |
| 3589 | 18390   | Oprm1         | opioid receptor, mu 1                                                                   | 0               | 2               | 3                | -1.60149            |
| 3590 | 14460   | Gata1         | GATA binding protein 1                                                                  | 0               | 2               | 3                | -1.60148            |
| 3591 | 18143   | Npas2         | neuronal PAS domain protein 2                                                           | 0               | 2               | 3                | -1.60066            |
| 3592 | 73739   | Pgea1         | chibby homolog 1 (Drosophila)                                                           | 0               | 2               | 3                | -1.60016            |
| 3593 | 16421   | Itgb7         | integrin beta 7                                                                         | 0               | 2               | 3                | -1.59978            |
| 3594 | 208884  | Zdhhc9        | zinc finger, DHHC domain containing 9                                                   | 0               | 2               | 3                | -1.59941            |
| 3595 | 19182   | Psmc3         | proteasome (prosome, macropain) 26S subunit, ATPase 3                                   | 0               | 2               | 3                | -1.59936            |
| 3596 | 216190  | Dip3b         | adaptor protein, phosphotyrosine interaction, PH domain and leucine zipper containing 2 | 0               | 2               | 3                | -1.59932            |
| 3597 | 81018   | Zfp313        | ring finger protein 114                                                                 | 0               | 2               | 3                | -1.59876            |
| 3598 | 17313   | Mgp           | matrix Gla protein                                                                      | 0               | 2               | 3                | -1.59865            |
| 3599 | 21754   | Tesk1         | testis specific protein kinase 1                                                        | 0               | 2               | 3                | -1.59771            |
| 3600 | 67070   | Lsm14a        | LSM14 homolog A (SCD6, S. cerevisiae)                                                   | 0               | 2               | 3                | -1.59754            |
| 3601 | 56485   | Slc2a5        | solute carrier family 2 (facilitated glucose transporter), member 5                     | 0               | 2               | 2                | -1.59734            |
| 3602 | 107868  | Usp9y         | ubiquitin specific peptidase 9, Y chromosome                                            | 0               | 2               | 3                | -1.59678            |
| 3603 | 435231  | UNK           | NA                                                                                      | 0               | 2               | 2                | -1.59673            |
| 3604 | 212483  | BC021381      | family with sequence similarity 193, member B                                           | 0               | 2               | 2                | -1.59635            |
| 3605 | 432436  | LOC432436     | predicted gene 5420                                                                     | 0               | 2               | 3                | -1.59577            |
| 3606 | 224624  | Rab40c        | Rab40c, member RAS oncogene family                                                      | 0               | 2               | 3                | -1.59564            |
| 3607 | 16553   | Kif13a        | kinesin family member 13A                                                               | 0               | 2               | 3                | -1.59553            |
| 3608 | 329986  | BC080695      | cDNA sequence BC080695                                                                  | 0               | 2               | 3                | -1.59536            |
| 3609 | 14800   | Gria2         | glutamate receptor, ionotropic, AMPA2 (alpha 2)                                         | 0               | 2               | 3                | -1.59506            |
| 3610 | 69299   | Asb9          | ankyrin repeat and SOCS box-containing 9                                                | 0               | 2               | 2                | -1.59491            |
| 3611 | 17257   | Mecp2         | methyl CpG binding protein 2                                                            | 0               | 2               | 3                | -1.59468            |
| 3612 | 12401   | Serpina6      | serine (or cysteine) peptidase inhibitor, clade A, member 6                             | 0               | 2               | 3                | -1.59463            |
| 3613 | 70113   | 2010001J22Rik | outer dense fiber of sperm tails 3B                                                     | 0               | 2               | 2                | -1.59357            |
| 3614 | 58170   | Accn5         | amiloride-sensitive cation channel 5, intestinal                                        | 0               | 2               | 3                | -1.59325            |
| 3615 | 66308   | 2810021B07Rik | RIKEN cDNA 2810021B07 gene                                                              | 0               | 2               | 3                | -1.59324            |
| 3616 | 13796   | Emx1          | empty spiracles homolog 1 (Drosophila)                                                  | 0               | 2               | 2                | -1.59307            |
| 3617 | 71820   | Wdr34         | WD repeat domain 34                                                                     | 0               | 2               | 3                | -1.59297            |
| 3618 | 12259   | C1qa          | complement component 1, q subcomponent, alpha polypeptide                               | 0               | 2               | 3                | -1.59293            |
| 3619 | 69444   | Lyzl6         | lysozyme-like 6                                                                         | 0               | 2               | 2                | -1.5929             |
| 3620 | 66873   | 1200009O22Rik | TLR4 interactor with leucine-rich repeats                                               | 0               | 2               | 3                | -1.59288            |
| 3621 | 258717  | Olf429        | olfactory receptor 429                                                                  | 0               | 2               | 2                | -1.59286            |
| 3622 | 66240   | Kcne1l        | potassium voltage-gated channel, Isk-related family, member 1-like, pseudogene          | 0               | 2               | 3                | -1.59224            |

## Candidates for positive regulators of normal growth (Fisher's)

| Rank | entrez# | Gene Symbol   | Gene name                                                          | enriched shRNAs | depleted shRNAs | no change shRNAs | average Fold Change |
|------|---------|---------------|--------------------------------------------------------------------|-----------------|-----------------|------------------|---------------------|
| 3623 | 435655  | UNK           | NA                                                                 | 0               | 2               | 3                | -1.59119            |
| 3624 | 14368   | Fzd6          | frizzled homolog 6 (Drosophila)                                    | 0               | 2               | 3                | -1.59093            |
| 3625 | 57272   | Olf140        | olfactory receptor 140                                             | 0               | 2               | 3                | -1.59087            |
| 3626 | 244701  | Mtnr1b        | melatonin receptor 1B                                              | 0               | 2               | 3                | -1.59087            |
| 3627 | 12307   | Calb1         | calbindin 1                                                        | 0               | 2               | 3                | -1.59007            |
| 3628 | 69048   | Slc30a5       | solute carrier family 30 (zinc transporter), member 5              | 0               | 2               | 3                | -1.5894             |
| 3629 | 436002  | Olf1627       | olfactory receptor 243                                             | 0               | 2               | 3                | -1.58936            |
| 3630 | 29862   | Ninj2         | ninjurin 2                                                         | 0               | 2               | 2                | -1.58891            |
| 3631 | 71690   | Esm1          | endothelial cell-specific molecule 1                               | 0               | 2               | 2                | -1.58874            |
| 3632 | 18095   | Nkx3-1        | NK-3 transcription factor, locus 1 (Drosophila)                    | 0               | 2               | 3                | -1.5886             |
| 3633 | 19139   | Prps1         | phosphoribosyl pyrophosphate synthetase 1                          | 0               | 2               | 3                | -1.58852            |
| 3634 | 14373   | G0s2          | G0/G1 switch gene 2                                                | 0               | 2               | 3                | -1.58785            |
| 3635 | 230809  | Pdik1l        | PDLIM1 interacting kinase 1 like                                   | 0               | 2               | 3                | -1.58704            |
| 3636 | 68338   | Golt1a        | golgi transport 1 homolog A (S. cerevisiae)                        | 0               | 2               | 2                | -1.58626            |
| 3637 | 56209   | Mir16         | glycerophosphodiester phosphodiesterase 1                          | 0               | 2               | 3                | -1.58613            |
| 3638 | 66402   | Sln           | sarcolipin                                                         | 0               | 2               | 3                | -1.586              |
| 3639 | 69773   | 1810026J23Rik | RIKEN cDNA 1810026J23 gene                                         | 0               | 2               | 3                | -1.5842             |
| 3640 | 73242   | 2610110G12Rik | alpha tubulin acetyltransferase 1                                  | 0               | 2               | 2                | -1.58395            |
| 3641 | 171210  | Acot2         | acyl-CoA thioesterase 2                                            | 0               | 2               | 3                | -1.58385            |
| 3642 | 109113  | Uhrf2         | ubiquitin-like, containing PHD and RING finger domains 2           | 0               | 2               | 3                | -1.58384            |
| 3643 | 436015  | LOC436015     | RIKEN cDNA B130016D09 cDNA                                         | 0               | 2               | 3                | -1.58362            |
| 3644 | 11732   | Ank           | progressive ankylosis                                              | 0               | 2               | 3                | -1.5834             |
| 3645 | 17083   | Tmed1         | transmembrane emp24 domain containing 1                            | 0               | 2               | 3                | -1.58336            |
| 3646 | 27360   | Add3          | adducin 3 (gamma)                                                  | 0               | 2               | 3                | -1.5833             |
| 3647 | 17217   | Mcm4          | minichromosome maintenance deficient 4 homolog (S. cerevisiae)     | 0               | 2               | 3                | -1.58323            |
| 3648 | 381337  | BC050210      | family with sequence similarity 178, member B                      | 0               | 2               | 2                | -1.58273            |
| 3649 | 399510  | Map4k5        | mitogen-activated protein kinase kinase kinase 5                   | 0               | 2               | 3                | -1.58258            |
| 3650 | 319317  | A930034L06Rik | small nucleolar RNA host gene 11                                   | 0               | 2               | 3                | -1.58253            |
| 3651 | 74670   | 4930432O21Rik | zinc finger protein 943                                            | 0               | 2               | 3                | -1.58192            |
| 3652 | 21951   | Tnks          | tankyrase, TRF1-interacting ankyrin-related ADP-ribose polymerase  | 0               | 2               | 2                | -1.58186            |
| 3653 | 56722   | Litaf         | LPS-induced TN factor                                              | 0               | 2               | 3                | -1.58145            |
| 3654 | 64103   | Tnmd          | tenomodulin                                                        | 0               | 2               | 3                | -1.5811             |
| 3655 | 68566   | Drd1ip        | calcyon neuron-specific vesicular protein                          | 0               | 2               | 3                | -1.5806             |
| 3656 | 238831  | Ppwd1         | peptidylprolyl isomerase domain and WD repeat containing 1         | 0               | 2               | 2                | -1.58036            |
| 3657 | 140475  | Bsnd          | Bartter syndrome, infantile, with sensorineural deafness (Barttin) | 0               | 2               | 2                | -1.57963            |
| 3658 | 73680   | 2410081M15Rik | zinc finger and BTB domain containing 8a                           | 0               | 2               | 3                | -1.57937            |
| 3659 | 18214   | Ddr2          | discoidin domain receptor family, member 2                         | 0               | 2               | 3                | -1.57937            |

Candidates for positive regulators of normal growth (Fisher's)

| Rank | entrez# | Gene Symbol   | Gene name                                                                                 | enriched shRNAs | depleted shRNAs | no change shRNAs | average Fold Change |
|------|---------|---------------|-------------------------------------------------------------------------------------------|-----------------|-----------------|------------------|---------------------|
| 3660 | 20317   | Serpinf1      | serine (or cysteine) peptidase inhibitor, clade F, member 1                               | 0               | 2               | 3                | -1.57918            |
| 3661 | 258493  | Olf319        | olfactory receptor 319                                                                    | 0               | 2               | 3                | -1.57917            |
| 3662 | 57321   | Terf2ip       | telomeric repeat binding factor 2, interacting protein                                    | 0               | 2               | 3                | -1.57914            |
| 3663 | 69080   | Gmppa         | GDP-mannose pyrophosphorylase A                                                           | 0               | 2               | 3                | -1.57899            |
| 3664 | 102220  | E330037G11Rik | RIKEN cDNA E330037G11 gene                                                                | 0               | 2               | 3                | -1.57889            |
| 3665 | 106581  | Itfg3         | integrin alpha FG-GAP repeat containing 3                                                 | 0               | 2               | 2                | -1.57864            |
| 3666 | 68947   | Chst8         | carbohydrate (N-acetylgalactosamine 4-O) sulfotransferase 8                               | 0               | 2               | 3                | -1.5779             |
| 3667 | 232157  | Mobk1b        | MOB kinase activator 1A                                                                   | 0               | 2               | 3                | -1.57786            |
| 3668 | 435820  | UNK           | NA                                                                                        | 0               | 2               | 2                | -1.57731            |
| 3669 | 258913  | Olf1377       | olfactory receptor 1377                                                                   | 0               | 2               | 2                | -1.57727            |
| 3670 | 239528  | Eif2c2        | eukaryotic translation initiation factor 2C, 2                                            | 0               | 2               | 3                | -1.57701            |
| 3671 | 67052   | Kntc2         | NDC80 homolog, kinetochore complex component (S. cerevisiae)                              | 0               | 2               | 3                | -1.57675            |
| 3672 | 258472  | Olf899        | olfactory receptor 899                                                                    | 0               | 2               | 3                | -1.57658            |
| 3673 | 69309   | Slc16a13      | solute carrier family 16 (monocarboxylic acid transporters), member 13                    | 0               | 2               | 3                | -1.5759             |
| 3674 | 12990   | Csna          | casein alpha s1                                                                           | 0               | 2               | 3                | -1.57578            |
| 3675 | 243362  | Stard13       | StAR-related lipid transfer (START) domain containing 13                                  | 0               | 2               | 3                | -1.57565            |
| 3676 | 67103   | Ltb4dh        | prostaglandin reductase 1                                                                 | 0               | 2               | 3                | -1.57547            |
| 3677 | 71795   | Pitpnc1       | phosphatidylinositol transfer protein, cytoplasmic 1                                      | 0               | 2               | 3                | -1.57541            |
| 3678 | 14867   | Gstm6         | glutathione S-transferase, mu 6                                                           | 0               | 2               | 3                | -1.57536            |
| 3679 | 102032  | Al316807      | expressed sequence Al316807                                                               | 0               | 2               | 2                | -1.57531            |
| 3680 | 72324   | Plxdc1        | plexin domain containing 1                                                                | 0               | 2               | 3                | -1.57501            |
| 3681 | 326619  | Hist1h4a      | histone cluster 1, H4a                                                                    | 0               | 2               | 3                | -1.57489            |
| 3682 | 224093  | BC022623      | family with sequence similarity 43, member A                                              | 0               | 2               | 3                | -1.57448            |
| 3683 | 104886  | Rab15         | RAB15, member RAS oncogene family                                                         | 0               | 2               | 3                | -1.57394            |
| 3684 | 237759  | Col23a1       | collagen, type XXIII, alpha 1                                                             | 0               | 2               | 3                | -1.57375            |
| 3685 | 69123   | 1810022C23Rik | enoyl-Coenzyme A delta isomerase 3                                                        | 0               | 2               | 3                | -1.57285            |
| 3686 | 171262  | V1r1          | vomer nasal 1 receptor 70                                                                 | 0               | 2               | 2                | -1.57272            |
| 3687 | 67864   | Yip4          | Yip1 domain family, member 4                                                              | 0               | 2               | 3                | -1.57263            |
| 3688 | 268465  | Eme1          | essential meiotic endonuclease 1 homolog 1 (S. pombe)                                     | 0               | 2               | 2                | -1.57164            |
| 3689 | 16815   | Lbx2          | ladybird homeobox homolog 2 (Drosophila)                                                  | 0               | 2               | 3                | -1.57154            |
| 3690 | 18389   | Opr1          | opioid receptor-like 1                                                                    | 0               | 2               | 3                | -1.57139            |
| 3691 | 74325   | Cltb          | clathrin, light polypeptide (Lcb)                                                         | 0               | 2               | 2                | -1.57118            |
| 3692 | 14109   | Fau           | Finkel-Biskis-Reilly murine sarcoma virus (FBR-MuSV) ubiquitously expressed (fox derived) | 0               | 2               | 3                | -1.57095            |
| 3693 | 50500   | Ttpa          | tocopherol (alpha) transfer protein                                                       | 0               | 2               | 3                | -1.57085            |
| 3694 | 76652   | Arpm1         | actin related protein M1                                                                  | 0               | 2               | 3                | -1.57049            |
| 3695 | 319955  | Ercc6         | excision repair cross-complementing rodent repair deficiency, complementation group 6     | 0               | 2               | 2                | -1.57037            |
| 3696 | 319301  | A730027B03Rik | NA                                                                                        | 0               | 2               | 3                | -1.57021            |

Candidates for positive regulators of normal growth (Fisher's)

| Rank | entrez# | Gene Symbol   | Gene name                                                              | enriched shRNAs | depleted shRNAs | no change shRNAs | average Fold Change |
|------|---------|---------------|------------------------------------------------------------------------|-----------------|-----------------|------------------|---------------------|
| 3697 | 320898  | A430107P09Rik | T cell receptor alpha variable 3-3                                     | 0               | 2               | 3                | -1.56971            |
| 3698 | 218490  | Btf3          | basic transcription factor 3                                           | 0               | 2               | 3                | -1.56942            |
| 3699 | 20505   | Slc34a1       | solute carrier family 34 (sodium phosphate), member 1                  | 0               | 2               | 3                | -1.56891            |
| 3700 | 104002  | Ctsq          | cathepsin Q                                                            | 0               | 2               | 3                | -1.56862            |
| 3701 | 66958   | Txndc14       | thioredoxin-related transmembrane protein 2                            | 0               | 2               | 3                | -1.56852            |
| 3702 | 436019  | UNK           | NA                                                                     | 0               | 2               | 3                | -1.5685             |
| 3703 | 72061   | 2010111I01Rik | RIKEN cDNA 2010111I01 gene                                             | 0               | 2               | 3                | -1.56812            |
| 3704 | 386546  | UNK           | NA                                                                     | 0               | 2               | 3                | -1.5681             |
| 3705 | 58200   | Ppp1r1a       | protein phosphatase 1, regulatory (inhibitor) subunit 1A               | 0               | 2               | 3                | -1.56792            |
| 3706 | 14526   | Gcg           | glucagon                                                               | 0               | 2               | 3                | -1.56776            |
| 3707 | 76938   | Rbm17         | RNA binding motif protein 17                                           | 0               | 2               | 3                | -1.56765            |
| 3708 | 234290  | BC030500      | cDNA sequence BC030500                                                 | 0               | 2               | 3                | -1.5674             |
| 3709 | 107351  | Ankrd15       | KN motif and ankyrin repeat domains 1                                  | 0               | 2               | 3                | -1.56725            |
| 3710 | 333667  | UNK           | NA                                                                     | 0               | 2               | 3                | -1.56698            |
| 3711 | 22113   | Phlda2        | pleckstrin homology-like domain, family A, member 2                    | 0               | 2               | 3                | -1.56652            |
| 3712 | 17885   | Myh8          | myosin, heavy polypeptide 8, skeletal muscle, perinatal                | 0               | 2               | 3                | -1.56624            |
| 3713 | 22379   | Fmnl3         | formin-like 3                                                          | 0               | 2               | 2                | -1.56607            |
| 3714 | 56742   | Psrc1         | proline/serine-rich coiled-coil 1                                      | 0               | 2               | 3                | -1.56581            |
| 3715 | 68097   | Dynl12        | dynein light chain LC8-type 2                                          | 0               | 2               | 2                | -1.56544            |
| 3716 | 109889  | Mzf1          | myeloid zinc finger 1                                                  | 0               | 2               | 3                | -1.56531            |
| 3717 | 21814   | Tgfb3         | transforming growth factor, beta receptor III                          | 0               | 2               | 3                | -1.56371            |
| 3718 | 14260   | Fmn1          | formin 1                                                               | 0               | 2               | 3                | -1.56363            |
| 3719 | 215031  | Vgll2         | vestigial like 2 homolog (Drosophila)                                  | 0               | 2               | 3                | -1.56354            |
| 3720 | 258649  | Olf441        | olfactory receptor 441                                                 | 0               | 2               | 2                | -1.56313            |
| 3721 | 97287   | 1110061O04Rik | myotubularin related protein 14                                        | 0               | 2               | 3                | -1.56295            |
| 3722 | 12034   | Phb2          | prohibitin 2                                                           | 0               | 2               | 3                | -1.56215            |
| 3723 | 232333  | Slc6a1        | solute carrier family 6 (neurotransmitter transporter, GABA), member 1 | 0               | 2               | 3                | -1.56162            |
| 3724 | 76568   | 1500035H01Rik | intraflagellar transport 46 homolog (Chlamydomonas)                    | 0               | 2               | 3                | -1.5616             |
| 3725 | 66326   | Dnajc5b       | DnaJ (Hsp40) homolog, subfamily C, member 5 beta                       | 0               | 2               | 3                | -1.56153            |
| 3726 | 22324   | Vav1          | vav 1 oncogene                                                         | 0               | 2               | 3                | -1.56141            |
| 3727 | 30795   | Fkbp3         | FK506 binding protein 3                                                | 0               | 2               | 3                | -1.56137            |
| 3728 | 93836   | Rnf111        | ring finger 111                                                        | 0               | 2               | 3                | -1.56114            |
| 3729 | 19158   | Pscd2         | cytohesin 2                                                            | 0               | 2               | 3                | -1.56109            |
| 3730 | 75292   | Prkcq         | protein kinase D3                                                      | 0               | 2               | 3                | -1.56095            |
| 3731 | 80978   | Mrgprh        | MAS-related GPR, member H                                              | 0               | 2               | 3                | -1.56095            |
| 3732 | 20762   | Sprr2h        | small proline-rich protein 2H                                          | 0               | 2               | 2                | -1.56072            |
| 3733 | 12967   | Crygd         | crystallin, gamma D                                                    | 0               | 2               | 3                | -1.56066            |



Candidates for positive regulators of normal growth (Fisher's)

| Rank | entrez# | Gene Symbol   | Gene name                                                                                         | enriched shRNAs | depleted shRNAs | no change shRNAs | average Fold Change |
|------|---------|---------------|---------------------------------------------------------------------------------------------------|-----------------|-----------------|------------------|---------------------|
| 3734 | 234814  | Mthfsd        | methenyltetrahydrofolate synthetase domain containing                                             | 0               | 2               | 2                | -1.56065            |
| 3735 | 53598   | Dctn3         | dynactin 3                                                                                        | 0               | 2               | 3                | -1.56028            |
| 3736 | 113848  | V1ra6         | vomeronasal 1 receptor 42                                                                         | 0               | 2               | 3                | -1.55988            |
| 3737 | 17354   | Mllt10        | myeloid/lymphoid or mixed-lineage leukemia (trithorax homolog, Drosophila); translocated to, 10   | 0               | 2               | 3                | -1.55985            |
| 3738 | 12739   | Cldn3         | claudin 3                                                                                         | 0               | 2               | 3                | -1.55984            |
| 3739 | 73724   | Mcee          | methylmalonyl CoA epimerase                                                                       | 0               | 2               | 2                | -1.55976            |
| 3740 | 18559   | Pctp          | phosphatidylcholine transfer protein                                                              | 0               | 2               | 3                | -1.55924            |
| 3741 | 109346  | Ankrd39       | ankyrin repeat domain 39                                                                          | 0               | 2               | 3                | -1.55868            |
| 3742 | 16886   | Limk2         | LIM motif-containing protein kinase 2                                                             | 0               | 2               | 3                | -1.55858            |
| 3743 | 16326   | Inhbe         | inhibin beta E                                                                                    | 0               | 2               | 3                | -1.55838            |
| 3744 | 21410   | Tcf2          | HNF1 homeobox B                                                                                   | 0               | 2               | 3                | -1.55774            |
| 3745 | 208188  | Ghnr          | growth hormone secretagogue receptor                                                              | 0               | 2               | 3                | -1.55767            |
| 3746 | 258731  | Olf491        | olfactory receptor 491                                                                            | 0               | 2               | 2                | -1.55766            |
| 3747 | 70853   | 4921511C04Rik | von Willebrand factor A domain containing 3B                                                      | 0               | 2               | 2                | -1.55759            |
| 3748 | 238021  | Fscn2         | fascin homolog 2, actin-bundling protein, retinal (Strongylocentrotus purpuratus)                 | 0               | 2               | 3                | -1.55728            |
| 3749 | 117592  | B3galt6       | UDP-Gal:betaGal beta 1,3-galactosyltransferase, polypeptide 6                                     | 0               | 2               | 3                | -1.55728            |
| 3750 | 83796   | Smarcd2       | SWI/SNF related, matrix associated, actin dependent regulator of chromatin, subfamily d, member 2 | 0               | 2               | 3                | -1.55705            |
| 3751 | 73062   | Ppp1r16a      | protein phosphatase 1, regulatory (inhibitor) subunit 16A                                         | 0               | 2               | 3                | -1.55702            |
| 3752 | 228061  | Agps          | alkylglycerone phosphate synthase                                                                 | 0               | 2               | 3                | -1.55698            |
| 3753 | 216874  | Camta2        | calmodulin binding transcription activator 2                                                      | 0               | 2               | 2                | -1.55656            |
| 3754 | 258561  | Olf1012       | olfactory receptor 1012                                                                           | 0               | 2               | 2                | -1.55641            |
| 3755 | 258330  | Olf1274       | olfactory receptor 1274, pseudogene                                                               | 0               | 2               | 3                | -1.55633            |
| 3756 | 14426   | Galnt4        | UDP-N-acetyl-alpha-D-galactosamine:polypeptide N-acetylgalactosaminyltransferase 4                | 0               | 2               | 3                | -1.55628            |
| 3757 | 435974  | UNK           | NA                                                                                                | 0               | 2               | 3                | -1.55612            |
| 3758 | 68828   | Sync          | syncoilin                                                                                         | 0               | 2               | 3                | -1.55572            |
| 3759 | 320736  | E130203B14Rik | RIKEN cDNA E130203B14 gene                                                                        | 0               | 2               | 2                | -1.55508            |
| 3760 | 100986  | Akap9         | A kinase (PRKA) anchor protein (yotiao) 9                                                         | 0               | 2               | 3                | -1.55508            |
| 3761 | 442816  | F830005K03Rik | RIKEN cDNA F830005K03 gene                                                                        | 0               | 2               | 3                | -1.55495            |
| 3762 | 268396  | G431001E03Rik | SH3 and PX domains 2B                                                                             | 0               | 2               | 3                | -1.55471            |
| 3763 | 66073   | Txndc12       | thioredoxin domain containing 12 (endoplasmic reticulum)                                          | 0               | 2               | 3                | -1.55414            |
| 3764 | 19267   | Ptpre         | protein tyrosine phosphatase, receptor type, E                                                    | 0               | 2               | 3                | -1.55411            |
| 3765 | 449000  | BC018101      | zinc finger protein 960                                                                           | 0               | 2               | 3                | -1.55403            |
| 3766 | 54124   | Cks1b         | CDC28 protein kinase 1b                                                                           | 0               | 2               | 3                | -1.55402            |
| 3767 | 72826   | 2810485I05Rik | family with sequence similarity 76, member B                                                      | 0               | 2               | 3                | -1.55392            |
| 3768 | 18419   | Otog          | otogelin                                                                                          | 0               | 2               | 3                | -1.55382            |
| 3769 | 15434   | Hoxd3         | homeobox D3                                                                                       | 0               | 2               | 3                | -1.55359            |
| 3770 | 17762   | Mapt          | microtubule-associated protein tau                                                                | 0               | 2               | 3                | -1.55331            |

Candidates for positive regulators of normal growth (Fisher's)

| Rank | entrez# | Gene Symbol   | Gene name                                                                                 | enriched shRNAs | depleted shRNAs | no change shRNAs | average Fold Change |
|------|---------|---------------|-------------------------------------------------------------------------------------------|-----------------|-----------------|------------------|---------------------|
| 3771 | 104099  | Itga9         | integrin alpha 9                                                                          | 0               | 2               | 3                | -1.5533             |
| 3772 | 22355   | Vipr2         | vasoactive intestinal peptide receptor 2                                                  | 0               | 2               | 3                | -1.55323            |
| 3773 | 107526  | Gimap4        | GTPase, IMAP family member 4                                                              | 0               | 2               | 3                | -1.55321            |
| 3774 | 67073   | Pi4k2b        | phosphatidylinositol 4-kinase type 2 beta                                                 | 0               | 2               | 3                | -1.55318            |
| 3775 | 58239   | Dexi          | dexamethasone-induced transcript                                                          | 0               | 2               | 3                | -1.55296            |
| 3776 | 20524   | Slc25a17      | solute carrier family 25 (mitochondrial carrier, peroxisomal membrane protein), member 17 | 0               | 2               | 2                | -1.55255            |
| 3777 | 58996   | Arhgap23      | Rho GTPase activating protein 23                                                          | 0               | 2               | 3                | -1.5525             |
| 3778 | 268780  | AU040377      | EGF-like, fibronectin type III and laminin G domains                                      | 0               | 2               | 3                | -1.55235            |
| 3779 | 239157  | Pnma2         | paraneoplastic antigen MA2                                                                | 0               | 2               | 3                | -1.55221            |
| 3780 | 193286  | BC049762      | cDNA sequence BC049762                                                                    | 0               | 2               | 3                | -1.55159            |
| 3781 | 57442   | Kcne3         | potassium voltage-gated channel, Isk-related subfamily, gene 3                            | 0               | 2               | 3                | -1.55148            |
| 3782 | 19773   | Rln1          | relaxin 1                                                                                 | 0               | 2               | 2                | -1.55098            |
| 3783 | 60363   | Cldn15        | claudin 15                                                                                | 0               | 2               | 3                | -1.54998            |
| 3784 | 171275  | V1rh18        | vomeronasal 1 receptor 212                                                                | 0               | 2               | 2                | -1.54978            |
| 3785 | 74080   | Nmnat3        | nicotinamide nucleotide adenylyltransferase 3                                             | 0               | 2               | 3                | -1.54906            |
| 3786 | 239835  | UNK           | NA                                                                                        | 0               | 2               | 3                | -1.54883            |
| 3787 | 20671   | Sox17         | SRY-box containing gene 17                                                                | 0               | 2               | 3                | -1.54842            |
| 3788 | 14870   | Gstp1         | glutathione S-transferase, pi 1                                                           | 0               | 2               | 3                | -1.54744            |
| 3789 | 66234   | Sc4mol        | sterol-C4-methyl oxidase-like                                                             | 0               | 2               | 3                | -1.54663            |
| 3790 | 243197  | Mfsd7         | major facilitator superfamily domain containing 7A                                        | 0               | 2               | 3                | -1.54638            |
| 3791 | 11540   | Adora2a       | adenosine A2a receptor                                                                    | 0               | 2               | 3                | -1.54603            |
| 3792 | 11767   | Ap1m1         | adaptor-related protein complex AP-1, mu subunit 1                                        | 0               | 2               | 3                | -1.54596            |
| 3793 | 12818   | Col14a1       | collagen, type XIV, alpha 1                                                               | 0               | 2               | 3                | -1.5455             |
| 3794 | 12182   | Bst1          | bone marrow stromal cell antigen 1                                                        | 0               | 2               | 3                | -1.54516            |
| 3795 | 71761   | Amdhd1        | amidohydrolase domain containing 1                                                        | 0               | 2               | 3                | -1.54508            |
| 3796 | 399599  | Ccdc87        | coiled-coil domain containing 87                                                          | 0               | 2               | 2                | -1.54503            |
| 3797 | 74513   | Neto2         | neuropilin (NRP) and tolloid (TLL)-like 2                                                 | 0               | 2               | 3                | -1.54478            |
| 3798 | 240067  | BC057593      | zinc finger protein 952                                                                   | 0               | 2               | 3                | -1.54463            |
| 3799 | 11567   | Avil          | advillin                                                                                  | 0               | 2               | 2                | -1.54446            |
| 3800 | 13169   | Dbnl          | drebrin-like                                                                              | 0               | 2               | 3                | -1.54412            |
| 3801 | 14237   | Foxd4         | forkhead box D4                                                                           | 0               | 2               | 3                | -1.5441             |
| 3802 | 17878   | Myf6          | myogenic factor 6                                                                         | 0               | 2               | 3                | -1.54406            |
| 3803 | 13497   | Drp2          | dystrophin related protein 2                                                              | 0               | 2               | 2                | -1.54386            |
| 3804 | 216166  | 6330514A18Rik | polo-like kinase 5 ( <i>Drosophila</i> )                                                  | 0               | 2               | 3                | -1.54368            |
| 3805 | 12151   | Bmi1          | Bmi1 polycomb ring finger oncogene                                                        | 0               | 2               | 3                | -1.5432             |
| 3806 | 18846   | Plexna3       | plexin A3                                                                                 | 0               | 2               | 3                | -1.54301            |
| 3807 | 56492   | Cldn18        | claudin 18                                                                                | 0               | 2               | 3                | -1.54285            |

Candidates for positive regulators of normal growth (Fisher's)

| Rank | entrez# | Gene Symbol   | Gene name                                                      | enriched shRNAs | depleted shRNAs | no change shRNAs | average Fold Change |
|------|---------|---------------|----------------------------------------------------------------|-----------------|-----------------|------------------|---------------------|
| 3808 | 70420   | 2610034B18Rik | RIKEN cDNA 2610034B18 gene                                     | 0               | 2               | 3                | -1.5428             |
| 3809 | 66890   | Lman2         | lectin, mannose-binding 2                                      | 0               | 2               | 3                | -1.54271            |
| 3810 | 15975   | Ifnar1        | interferon (alpha and beta) receptor 1                         | 0               | 2               | 3                | -1.54268            |
| 3811 | 74376   | Myo18b        | myosin XVIIIb                                                  | 0               | 2               | 3                | -1.54223            |
| 3812 | 233900  | Rnf40         | ring finger protein 40                                         | 0               | 2               | 3                | -1.54216            |
| 3813 | 229534  | Pbxip1        | pre B cell leukemia transcription factor interacting protein 1 | 0               | 2               | 3                | -1.54209            |
| 3814 | 381149  | Nrg2          | NA                                                             | 0               | 2               | 3                | -1.54163            |
| 3815 | 268980  | Strn          | striatin, calmodulin binding protein                           | 0               | 2               | 2                | -1.54144            |
| 3816 | 258443  | Olf164        | olfactory receptor 164                                         | 0               | 2               | 3                | -1.54131            |
| 3817 | 85030   | Tnfrsf25      | tumor necrosis factor receptor superfamily, member 25          | 0               | 2               | 3                | -1.54104            |
| 3818 | 76413   | 1700016D06Rik | RIKEN cDNA 1700016D06 gene                                     | 0               | 2               | 3                | -1.54069            |
| 3819 | 242466  | Zfp462        | zinc finger protein 462                                        | 0               | 2               | 3                | -1.54057            |
| 3820 | 14661   | Glud1         | glutamate dehydrogenase 1                                      | 0               | 2               | 3                | -1.5403             |
| 3821 | 14580   | Gfap          | glial fibrillary acidic protein                                | 0               | 2               | 3                | -1.54007            |
| 3822 | 80796   | Calm4         | calmodulin 4                                                   | 0               | 2               | 3                | -1.53921            |
| 3823 | 64337   | Gng13         | guanine nucleotide binding protein (G protein), gamma 13       | 0               | 2               | 3                | -1.53898            |
| 3824 | 215814  | Ccdc28a       | coiled-coil domain containing 28A                              | 0               | 2               | 2                | -1.53883            |
| 3825 | 15184   | Hdac5         | histone deacetylase 5                                          | 0               | 2               | 3                | -1.53865            |
| 3826 | 78798   | Eml4          | echinoderm microtubule associated protein like 4               | 0               | 2               | 3                | -1.53856            |
| 3827 | 22289   | Utx           | lysine (K)-specific demethylase 6A                             | 0               | 2               | 3                | -1.53836            |
| 3828 | 242406  | 1110029E03Rik | RGP1 retrograde golgi transport homolog (S. cerevisiae)        | 0               | 2               | 2                | -1.53757            |
| 3829 | 218241  | Gm270         | NA                                                             | 0               | 2               | 3                | -1.53739            |
| 3830 | 66151   | Prr13         | proline rich 13                                                | 0               | 2               | 3                | -1.53717            |
| 3831 | 13209   | Ddx6          | DEAD (Asp-Glu-Ala-Asp) box polypeptide 6                       | 0               | 2               | 3                | -1.53688            |
| 3832 | 13346   | Des           | desmin                                                         | 0               | 2               | 3                | -1.53655            |
| 3833 | 19362   | Rad51ap1      | RAD51 associated protein 1                                     | 0               | 2               | 2                | -1.53608            |
| 3834 | 72599   | Pdia5         | protein disulfide isomerase associated 5                       | 0               | 2               | 3                | -1.53544            |
| 3835 | 50762   | Fbxo6b        | F-box protein 6                                                | 0               | 2               | 3                | -1.53527            |
| 3836 | 18133   | Nov           | nephroblastoma overexpressed gene                              | 0               | 2               | 3                | -1.53508            |
| 3837 | 14299   | Freq          | neuronal calcium sensor 1                                      | 0               | 2               | 3                | -1.53472            |
| 3838 | 67125   | Tspan31       | tetraspanin 31                                                 | 0               | 2               | 2                | -1.53457            |
| 3839 | 16716   | Ky            | kyphoscoliosis peptidase                                       | 0               | 2               | 3                | -1.53446            |
| 3840 | 385509  | UNK           | NA                                                             | 0               | 2               | 3                | -1.53446            |
| 3841 | 17194   | Mbl1          | mannose-binding lectin (protein A) 1                           | 0               | 2               | 3                | -1.5344             |
| 3842 | 381181  | UNK           | NA                                                             | 0               | 2               | 3                | -1.53422            |
| 3843 | 384957  | LOC384957     | predicted gene 5367                                            | 0               | 2               | 3                | -1.53394            |
| 3844 | 268417  | Zfp496        | zinc finger with KRAB and SCAN domains 17                      | 0               | 2               | 3                | -1.53383            |

Candidates for positive regulators of normal growth (Fisher's)

| Rank | entrez# | Gene Symbol   | Gene name                                                         | enriched shRNAs | depleted shRNAs | no change shRNAs | average Fold Change |
|------|---------|---------------|-------------------------------------------------------------------|-----------------|-----------------|------------------|---------------------|
| 3845 | 107656  | Krt1-9        | keratin 9                                                         | 0               | 2               | 3                | -1.53349            |
| 3846 | 67797   | 6530403A03Rik | small nuclear ribonucleoprotein 48 (U11/U12)                      | 0               | 2               | 3                | -1.5329             |
| 3847 | 16627   | Klra1         | killer cell lectin-like receptor, subfamily A, member 1           | 0               | 2               | 3                | -1.53225            |
| 3848 | 233890  | BC026432      | zinc finger protein 768                                           | 0               | 2               | 3                | -1.53221            |
| 3849 | 77220   | C030003D03Rik | transmembrane protein 200A                                        | 0               | 2               | 3                | -1.53132            |
| 3850 | 384244  | LOC384244     | predicted gene 5294                                               | 0               | 2               | 2                | -1.53101            |
| 3851 | 80733   | Car15         | carbonic anhydrase 15                                             | 0               | 2               | 3                | -1.53052            |
| 3852 | 67664   | Rnf125        | ring finger protein 125                                           | 0               | 2               | 3                | -1.53043            |
| 3853 | 621071  | UNK           | NA                                                                | 0               | 2               | 3                | -1.53035            |
| 3854 | 21926   | Tnf           | tumor necrosis factor                                             | 0               | 2               | 2                | -1.53026            |
| 3855 | 17201   | Mc3r          | melanocortin 3 receptor                                           | 0               | 2               | 3                | -1.52963            |
| 3856 | 70097   | Sash1         | SAM and SH3 domain containing 1                                   | 0               | 2               | 3                | -1.52952            |
| 3857 | 170779  | Cd209d        | CD209d antigen                                                    | 0               | 2               | 3                | -1.52942            |
| 3858 | 50781   | Dkk3          | dickkopf homolog 3 ( <i>Xenopus laevis</i> )                      | 0               | 2               | 3                | -1.52935            |
| 3859 | 74682   | Wdr35         | WD repeat domain 35                                               | 0               | 2               | 3                | -1.5292             |
| 3860 | 252866  | Adam34        | a disintegrin and metallopeptidase domain 34                      | 0               | 2               | 3                | -1.52914            |
| 3861 | 215445  | Rab11fip3     | RAB11 family interacting protein 3 (class II)                     | 0               | 2               | 2                | -1.52869            |
| 3862 | 12142   | Prdm1         | PR domain containing 1, with ZNF domain                           | 0               | 2               | 3                | -1.52869            |
| 3863 | 69585   | Hfe2          | hemochromatosis type 2 (juvenile) (human homolog)                 | 0               | 2               | 3                | -1.52824            |
| 3864 | 12572   | Cdk7          | cyclin-dependent kinase 7                                         | 0               | 2               | 3                | -1.52761            |
| 3865 | 258773  | Olfir818      | olfactory receptor 818                                            | 0               | 2               | 2                | -1.52713            |
| 3866 | 64707   | Suv39h2       | suppressor of variegation 3-9 homolog 2 ( <i>Drosophila</i> )     | 0               | 2               | 3                | -1.52694            |
| 3867 | 73274   | Gbp1          | GC-rich promoter binding protein 1                                | 0               | 2               | 3                | -1.52671            |
| 3868 | 75462   | 1700001C19Rik | RIKEN cDNA 1700001C19 gene                                        | 0               | 2               | 3                | -1.52642            |
| 3869 | 381802  | Tsen2         | tRNA splicing endonuclease 2 homolog ( <i>S. cerevisiae</i> )     | 0               | 2               | 2                | -1.52628            |
| 3870 | 320590  | 9430071P14Rik | SV2 related protein homolog (rat)-like                            | 0               | 2               | 3                | -1.52608            |
| 3871 | 435707  | UNK           | NA                                                                | 0               | 2               | 3                | -1.52607            |
| 3872 | 213498  | Arhgef11      | Rho guanine nucleotide exchange factor (GEF) 11                   | 0               | 2               | 3                | -1.52575            |
| 3873 | 67144   | Lrrc40        | leucine rich repeat containing 40                                 | 0               | 2               | 3                | -1.52567            |
| 3874 | 16633   | Klra2         | killer cell lectin-like receptor, subfamily A, member 2           | 0               | 2               | 3                | -1.52551            |
| 3875 | 232370  | Clstn3        | calsyntenin 3                                                     | 0               | 2               | 3                | -1.52434            |
| 3876 | 68938   | Aspscr1       | alveolar soft part sarcoma chromosome region, candidate 1 (human) | 0               | 2               | 2                | -1.52427            |
| 3877 | 67067   | 2010100O12Rik | reactive oxygen species modulator 1                               | 0               | 2               | 3                | -1.5242             |
| 3878 | 264134  | Ttc26         | tetratricopeptide repeat domain 26                                | 0               | 2               | 2                | -1.52388            |
| 3879 | 75646   | Rai14         | retinoic acid induced 14                                          | 0               | 2               | 3                | -1.52333            |
| 3880 | 67854   | Slco6b1       | solute carrier organic anion transporter family, member 6b1       | 0               | 2               | 3                | -1.52332            |
| 3881 | 353235  | Pcdha8        | protocadherin alpha 8                                             | 0               | 2               | 3                | -1.52318            |

Candidates for positive regulators of normal growth (Fisher's)

| Rank | entrez# | Gene Symbol   | Gene name                                                                      | enriched shRNAs | depleted shRNAs | no change shRNAs | average Fold Change |
|------|---------|---------------|--------------------------------------------------------------------------------|-----------------|-----------------|------------------|---------------------|
| 3882 | 14317   | Ftcd          | formiminotransferase cyclodeaminase                                            | 0               | 2               | 3                | -1.52299            |
| 3883 | 12445   | Ccnd3         | cyclin D3                                                                      | 0               | 2               | 6                | -1.52184            |
| 3884 | 22157   | Tulp1         | tubby like protein 1                                                           | 0               | 2               | 3                | -1.52176            |
| 3885 | 14297   | Fxn           | frataxin                                                                       | 0               | 2               | 3                | -1.52176            |
| 3886 | 435897  | UNK           | NA                                                                             | 0               | 2               | 3                | -1.52159            |
| 3887 | 66161   | Pop4          | processing of precursor 4, ribonuclease P/MRP family, ( <i>S. cerevisiae</i> ) | 0               | 2               | 3                | -1.5213             |
| 3888 | 240690  | St18          | suppression of tumorigenicity 18                                               | 0               | 2               | 3                | -1.52105            |
| 3889 | 81906   | Cyp4x1        | cytochrome P450, family 4, subfamily x, polypeptide 1                          | 0               | 2               | 3                | -1.52027            |
| 3890 | 22147   | Tuba7         | tubulin, alpha 3B                                                              | 0               | 2               | 3                | -1.51981            |
| 3891 | 66125   | Sf3b5         | splicing factor 3b, subunit 5                                                  | 0               | 2               | 3                | -1.51907            |
| 3892 | 330305  | A630038D02    | predicted gene 5111                                                            | 0               | 2               | 2                | -1.51845            |
| 3893 | 68134   | Upf3b         | UPF3 regulator of nonsense transcripts homolog B (yeast)                       | 0               | 2               | 3                | -1.51842            |
| 3894 | 75302   | Asx12         | additional sex combs like 2 ( <i>Drosophila</i> )                              | 0               | 2               | 3                | -1.5177             |
| 3895 | 75607   | Wnk2          | WNK lysine deficient protein kinase 2                                          | 0               | 2               | 3                | -1.51746            |
| 3896 | 258466  | Olf1261       | olfactory receptor 1261                                                        | 0               | 2               | 3                | -1.51695            |
| 3897 | 215378  | B830045N13Rik | family with sequence similarity 5, member C                                    | 0               | 2               | 3                | -1.51672            |
| 3898 | 233328  | Lrrk1         | leucine-rich repeat kinase 1                                                   | 0               | 2               | 3                | -1.5163             |
| 3899 | 18105   | Nqo2          | NAD(P)H dehydrogenase, quinone 2                                               | 0               | 2               | 3                | -1.51552            |
| 3900 | 258292  | Olf446        | olfactory receptor 446                                                         | 0               | 2               | 3                | -1.5149             |
| 3901 | 18624   | Pepd          | peptidase D                                                                    | 0               | 2               | 3                | -1.51418            |
| 3902 | 217379  | Ubx4          | UBX domain protein 2A                                                          | 0               | 2               | 3                | -1.51402            |
| 3903 | 20707   | Serp1b9c      | serine (or cysteine) peptidase inhibitor, clade B, member 9c                   | 0               | 2               | 3                | -1.51335            |
| 3904 | 433391  | UNK           | NA                                                                             | 0               | 2               | 3                | -1.51313            |
| 3905 | 258807  | Olf910        | olfactory receptor 910                                                         | 0               | 2               | 2                | -1.51253            |
| 3906 | 14632   | Gli1          | GLI-Kruppel family member GLI1                                                 | 0               | 2               | 3                | -1.51208            |
| 3907 | 20363   | Sepp1         | selenoprotein P, plasma, 1                                                     | 0               | 2               | 3                | -1.51094            |
| 3908 | 56190   | Rnpc1         | RNA binding motif protein 38                                                   | 0               | 2               | 3                | -1.51074            |
| 3909 | 20362   | 39332         | septin 8                                                                       | 0               | 2               | 3                | -1.51003            |
| 3910 | 435253  | UNK           | NA                                                                             | 0               | 2               | 3                | -1.51002            |
| 3911 | 18514   | Pbx1          | pre B cell leukemia homeobox 1                                                 | 0               | 2               | 3                | -1.50983            |
| 3912 | 234542  | Rtbdn         | retbindin                                                                      | 0               | 2               | 3                | -1.50979            |
| 3913 | 30945   | Rnf19         | ring finger protein 19A                                                        | 0               | 2               | 3                | -1.50919            |
| 3914 | 74205   | Acs13         | acyl-CoA synthetase long-chain family member 3                                 | 0               | 2               | 3                | -1.50913            |
| 3915 | 20849   | Stat4         | signal transducer and activator of transcription 4                             | 0               | 2               | 3                | -1.50855            |
| 3916 | 56484   | Foxo3a        | forkhead box O3                                                                | 0               | 2               | 3                | -1.50815            |
| 3917 | 329251  | Ppp1r12b      | protein phosphatase 1, regulatory (inhibitor) subunit 12B                      | 0               | 2               | 3                | -1.50776            |
| 3918 | 329541  | A630008I04    | NA                                                                             | 0               | 2               | 2                | -1.50769            |

Candidates for positive regulators of normal growth (Fisher's)

| Rank | entrez# | Gene Symbol   | Gene name                                                    | enriched shRNAs | depleted shRNAs | no change shRNAs | average Fold Change |
|------|---------|---------------|--------------------------------------------------------------|-----------------|-----------------|------------------|---------------------|
| 3919 | 24111   | Uts2          | urotensin 2                                                  | 0               | 2               | 3                | -1.50727            |
| 3920 | 56214   | Scamp4        | secretory carrier membrane protein 4                         | 0               | 2               | 3                | -1.5069             |
| 3921 | 20472   | Six2          | sine oculis-related homeobox 2 homolog (Drosophila)          | 0               | 2               | 3                | -1.50678            |
| 3922 | 56044   | Rala          | v-ral simian leukemia viral oncogene homolog A (ras related) | 0               | 2               | 3                | -1.50671            |
| 3923 | 15561   | Htr3a         | 5-hydroxytryptamine (serotonin) receptor 3A                  | 0               | 2               | 3                | -1.5065             |
| 3924 | 228866  | F730014I05Rik | PDX1 C-terminal inhibiting factor 1                          | 0               | 2               | 3                | -1.50625            |
| 3925 | 72269   | Cda           | cytidine deaminase                                           | 0               | 2               | 2                | -1.50567            |
| 3926 | 319181  | Hist1h2bg     | histone cluster 1, H2bg                                      | 0               | 2               | 3                | -1.50542            |
| 3927 | 69185   | Dtwd1         | DTW domain containing 1                                      | 0               | 2               | 3                | -1.50539            |
| 3928 | 12981   | Csf2          | colony stimulating factor 2 (granulocyte-macrophage)         | 0               | 2               | 3                | -1.50499            |
| 3929 | 76483   | 2400010G15Rik | lipase maturation factor 1                                   | 0               | 2               | 2                | -1.50425            |
| 3930 | 20928   | Abcc9         | ATP-binding cassette, sub-family C (CFTR/MRP), member 9      | 0               | 2               | 3                | -1.50391            |
| 3931 | 245666  | lqsec2        | IQ motif and Sec7 domain 2                                   | 0               | 2               | 3                | -1.50387            |
| 3932 | 11535   | Adm           | adrenomedullin                                               | 0               | 2               | 3                | -1.50371            |
| 3933 | 80744   | BC003993      | CWC22 spliceosome-associated protein homolog (S. cerevisiae) | 0               | 2               | 3                | -1.50363            |
| 3934 | 12479   | Cd1d1         | CD1d1 antigen                                                | 0               | 2               | 3                | -1.50345            |
| 3935 | 214105  | Sox30         | SRY-box containing gene 30                                   | 0               | 2               | 3                | -1.50334            |
| 3936 | 73681   | 2410075D05Rik | tRNA methyltransferase 11 homolog (S. cerevisiae)            | 0               | 2               | 2                | -1.50238            |
| 3937 | 77057   | 4921524J06Rik | stonin 1                                                     | 0               | 2               | 3                | -1.50211            |
| 3938 | 19359   | Rad23b        | RAD23b homolog (S. cerevisiae)                               | 0               | 2               | 3                | -1.50172            |
| 3939 | 16369   | Irs3          | insulin receptor substrate 3                                 | 0               | 2               | 3                | -1.50168            |
| 3940 | 26951   | Zw10          | ZW10 homolog (Drosophila), centromere/kinetochore protein    | 0               | 2               | 3                | -1.50127            |
| 3941 | 19325   | Rab10         | RAB10, member RAS oncogene family                            | 0               | 2               | 3                | -1.5012             |
| 3942 | 100163  | Pafah2        | platelet-activating factor acetylhydrolase 2                 | 0               | 2               | 3                | -1.50119            |
| 3943 | 76872   | 4930432J16Rik | coiled-coil domain containing 116                            | 0               | 2               | 2                | -1.50101            |
| 3944 | 258709  | Olf415        | olfactory receptor 248                                       | 0               | 2               | 2                | -1.50055            |
| 3945 | 14729   | Gp5           | glycoprotein 5 (platelet)                                    | 0               | 2               | 3                | -1.50039            |
| 3946 | 71775   | 1300017J02Rik | RIKEN cDNA 1300017J02 gene                                   | 0               | 2               | 3                | -1.50023            |

Candidates for negative regulators of normal growth (Fisher's)

| Rank | entrez# | Gene Symbol   | Gene name                                                                              | enriched shRNAs | depleted shRNAs | no change shRNAs | average Fold Change |
|------|---------|---------------|----------------------------------------------------------------------------------------|-----------------|-----------------|------------------|---------------------|
| 1    | 12387   | Ctnnb1        | catenin (cadherin associated protein), beta 1                                          | 4               | 0               | 1                | 4.173271            |
| 2    | 108151  | Sema3d        | sema domain, immunoglobulin domain (Ig), short basic domain, secreted, (semaphorin) 3D | 3               | 0               | 2                | 1.973799            |
| 3    | 224904  | 2410015M20Rik | RIKEN cDNA 2410015M20 gene                                                             | 3               | 0               | 2                | 1.951938            |
| 4    | 74413   | Mtac2d1       | tandem C2 domains, nuclear                                                             | 3               | 0               | 2                | 1.910865            |
| 5    | 387341  | Tas2r106      | taste receptor, type 2, member 106                                                     | 4               | 0               | 1                | 1.881055            |
| 6    | 83559   | Tex18         | testis expressed gene 18                                                               | 3               | 0               | 2                | 1.871645            |
| 7    | 57869   | Adck2         | aarF domain containing kinase 2                                                        | 3               | 0               | 2                | 1.867268            |
| 8    | 14089   | Fap           | fibroblast activation protein                                                          | 3               | 0               | 1                | 1.815643            |
| 9    | 214459  | Fnbp1l        | formin binding protein 1-like                                                          | 3               | 0               | 1                | 1.808063            |
| 10   | 72507   | Dzip1l        | DAZ interacting protein 1-like                                                         | 3               | 0               | 2                | 1.777676            |
| 11   | 234967  | Slc36a4       | solute carrier family 36 (proton/amino acid symporter), member 4                       | 3               | 0               | 2                | 1.656406            |
| 12   | 21984   | Tpbpa         | trophoblast specific protein alpha                                                     | 3               | 0               | 1                | 1.642226            |
| 13   | 209324  | Stfna3l1      | predicted gene 4758                                                                    | 3               | 0               | 2                | 1.618576            |
| 14   | 104836  | Cbl1l         | Casitas B-lineage lymphoma-like 1                                                      | 3               | 0               | 2                | 1.611628            |
| 15   | 69192   | Dhx16         | DEAH (Asp-Glu-Ala-His) box polypeptide 16                                              | 4               | 0               | 1                | 1.609671            |
| 16   | 59287   | Ncstn         | nicastrin                                                                              | 3               | 0               | 2                | 1.593427            |
| 17   | 71724   | Aox3          | aldehyde oxidase 3                                                                     | 3               | 0               | 2                | 1.570283            |
| 18   | 20620   | Plk2          | polo-like kinase 2 (Drosophila)                                                        | 3               | 0               | 2                | 1.56609             |
| 19   | 12725   | Clcn3         | chloride channel 3                                                                     | 3               | 0               | 2                | 1.561527            |
| 20   | 75275   | 4930563P21Rik | transmembrane and coiled-coil domains 5B                                               | 3               | 0               | 2                | 1.552259            |
| 21   | 69727   | Usp46         | ubiquitin specific peptidase 46                                                        | 3               | 0               | 2                | 1.543912            |
| 22   | 50916   | Irx4          | Iroquois related homeobox 4 (Drosophila)                                               | 3               | 0               | 2                | 1.538668            |
| 23   | 224014  | Fgd4          | FYVE, RhoGEF and PH domain containing 4                                                | 4               | 0               | 1                | 1.538243            |
| 24   | 216850  | Jmjd3         | KDM1 lysine (K)-specific demethylase 6B                                                | 3               | 0               | 2                | 1.537687            |
| 25   | 19059   | Ppp3r2        | protein phosphatase 3, regulatory subunit B, alpha isoform (calcineurin B, type II)    | 3               | 0               | 2                | 1.524451            |
| 26   | 15467   | Eif2ak1       | eukaryotic translation initiation factor 2 alpha kinase 1                              | 3               | 0               | 2                | 1.479682            |
| 27   | 258882  | Olf874        | olfactory receptor 874                                                                 | 3               | 0               | 1                | 1.475258            |
| 28   | 13114   | Cyp3a16       | cytochrome P450, family 3, subfamily a, polypeptide 16                                 | 3               | 0               | 2                | 1.468151            |
| 29   | 117198  | Ivns1abp      | influenza virus NS1A binding protein                                                   | 3               | 0               | 1                | 1.451487            |
| 30   | 224860  | Plcl2         | phospholipase C-like 2                                                                 | 3               | 0               | 2                | 1.441496            |
| 31   | 67008   | 1600012F09Rik | RIKEN cDNA 1600012F09 gene                                                             | 3               | 0               | 2                | 1.427374            |
| 32   | 70556   | 5730438N18Rik | solute carrier family 25, member 33                                                    | 3               | 0               | 2                | 1.420766            |
| 33   | 331046  | Tgm4          | transglutaminase 4 (prostate)                                                          | 3               | 0               | 2                | 1.417887            |
| 34   | 12279   | C9            | complement component 9                                                                 | 3               | 0               | 2                | 1.417132            |
| 35   | 383133  | UNK           | NA                                                                                     | 3               | 0               | 2                | 1.395556            |
| 36   | 381622  | 5031410I06Rik | RIKEN cDNA 5031410I06 gene                                                             | 3               | 0               | 2                | 1.394361            |
| 37   | 280662  | Afm           | afamin                                                                                 | 3               | 0               | 2                | 1.360315            |

Candidates for negative regulators of normal growth (Fisher's)

| Rank | entrez# | Gene Symbol   | Gene name                                                   | enriched shRNAs | depleted shRNAs | no change shRNAs | average Fold Change |
|------|---------|---------------|-------------------------------------------------------------|-----------------|-----------------|------------------|---------------------|
| 38   | 16769   | Dsg4          | desmoglein 4                                                | 3               | 0               | 2                | 1.339893            |
| 39   | 63857   | Bcmo1         | beta-carotene 15,15'-monooxygenase                          | 3               | 0               | 2                | 1.329378            |
| 40   | 211430  | 4930533C12Rik | fer-1-like 5 (C. elegans)                                   | 3               | 0               | 2                | 1.309693            |
| 41   | 18844   | Plxna1        | plexin A1                                                   | 3               | 0               | 2                | 1.305834            |
| 42   | 387356  | Tas2r131      | taste receptor, type 2, member 131                          | 3               | 0               | 2                | 1.269943            |
| 43   | 225348  | Wdr36         | WD repeat domain 36                                         | 3               | 0               | 1                | 1.250725            |
| 44   | 68519   | Eml1          | echinoderm microtubule associated protein like 1            | 3               | 0               | 1                | 1.245585            |
| 45   | 50490   | Nox4          | NADPH oxidase 4                                             | 3               | 0               | 2                | 1.24293             |
| 46   | 105513  | Chmp7         | charged multivesicular body protein 7                       | 3               | 0               | 2                | 1.213845            |
| 47   | 53599   | Cd164         | CD164 antigen                                               | 3               | 0               | 2                | 1.161322            |
| 48   | 330502  | Zfp82         | zinc finger protein 82                                      | 3               | 0               | 1                | 1.158448            |
| 49   | 215474  | Sec22c        | SEC22 vesicle trafficking protein homolog C (S. cerevisiae) | 3               | 0               | 2                | 1.143149            |
| 50   | 67269   | Agtbbp1       | ATP/GTP binding protein 1                                   | 3               | 0               | 2                | 1.142271            |
| 51   | 58251   | Ddc8          | cDNA sequence BC100451                                      | 3               | 0               | 2                | 1.123179            |
| 52   | 373864  | Col27a1       | collagen, type XXVII, alpha 1                               | 4               | 0               | 1                | 1.090804            |



### Supplementary Table 3. Putative regulators of oncogenic growth identified by DESeq test of biological replicates.

Note: Candidates identified by both DESeq and Fisher's exact test are highlighted in purple.

Candidates for positive regulators of oncogenic growth (DESeq)

| Rank | entrez# | Gene Symbol   | Gene name                                                                                      | enriched shRNAs | depleted shRNAs | no change shRNAs | average Fold Change |
|------|---------|---------------|------------------------------------------------------------------------------------------------|-----------------|-----------------|------------------|---------------------|
| 1    | 12387   | Ctnnb1        | catenin (cadherin associated protein), beta 1                                                  | 0               | 5               | 0                | -4.176623           |
| 2    | 68836   | Mrpl52        | mitochondrial ribosomal protein L52                                                            | 0               | 3               | 0                | -4.805133           |
| 3    | 268449  | Rpl23a        | ribosomal protein L23A                                                                         | 0               | 3               | 0                | -3.449678           |
| 4    | 381979  | Brsk1         | BR serine/threonine kinase 1                                                                   | 0               | 3               | 0                | -3.279939           |
| 5    | 110157  | Raf1          | v-raf-leukemia viral oncogene 1                                                                | 0               | 3               | 0                | -3.119321           |
| 6    | 13002   | Dnajc5        | DnaJ (Hsp40) homolog, subfamily C, member 5                                                    | 0               | 3               | 0                | -2.978181           |
| 7    | 51813   | Ccnc          | cyclin C                                                                                       | 0               | 3               | 0                | -2.923364           |
| 8    | 77116   | Mtmr2         | myotubularin related protein 2                                                                 | 0               | 3               | 0                | -2.680317           |
| 9    | 98386   | Lbr           | lamin B receptor                                                                               | 0               | 3               | 0                | -2.294465           |
| 10   | 15461   | Hras1         | Harvey rat sarcoma virus oncogene 1                                                            | 0               | 3               | 0                | -1.861432           |
| 11   | 319186  | Hist1h2bm     | histone cluster 1, H2bm                                                                        | 0               | 2               | 0                | -6.309125           |
| 12   | 18131   | Notch3        | Notch gene homolog 3 (Drosophila)                                                              | 0               | 2               | 0                | -5.310052           |
| 13   | 50708   | Hist1h1c      | histone cluster 1, H1c                                                                         | 0               | 2               | 0                | -5.263624           |
| 14   | 319151  | Hist1h3e      | histone cluster 1, H3e                                                                         | 0               | 2               | 0                | -4.892688           |
| 15   | 105148  | Iars          | isoleucine-tRNA synthetase                                                                     | 0               | 2               | 0                | -4.501878           |
| 16   | 72113   | Adck1         | aarF domain containing kinase 1                                                                | 0               | 2               | 0                | -4.434846           |
| 17   | 192212  | Prom2         | prominin 2                                                                                     | 0               | 2               | 0                | -4.329995           |
| 18   | 76846   | Rps9          | ribosomal protein S9                                                                           | 0               | 2               | 0                | -4.186061           |
| 19   | 26465   | Zfp146        | zinc finger protein 146                                                                        | 0               | 2               | 0                | -4.140398           |
| 20   | 103710  | Slc35e4       | solute carrier family 35, member E4                                                            | 0               | 2               | 0                | -4.019999           |
| 21   | 74195   | Elp3          | elongation protein 3 homolog (S. cerevisiae)                                                   | 0               | 2               | 0                | -3.971798           |
| 22   | 20667   | Sox12         | SRY-box containing gene 12                                                                     | 0               | 2               | 0                | -3.957874           |
| 23   | 213696  | Duoxa1        | dual oxidase maturation factor 1                                                               | 0               | 2               | 0                | -3.894298           |
| 24   | 57266   | Cxcl14        | chemokine (C-X-C motif) ligand 14                                                              | 0               | 2               | 0                | -3.867642           |
| 25   | 66548   | Adamtsl5      | ADAMTS-like 5                                                                                  | 0               | 2               | 0                | -3.808016           |
| 26   | 107932  | Chd4          | chromodomain helicase DNA binding protein 4                                                    | 0               | 2               | 0                | -3.764744           |
| 27   | 66497   | 2610528E23Rik | RIKEN cDNA 2610528E23 gene                                                                     | 0               | 2               | 0                | -3.754096           |
| 28   | 66489   | Rpl35         | ribosomal protein L35                                                                          | 0               | 2               | 0                | -3.720453           |
| 29   | 246198  | Mllt6         | myeloid/lymphoid or mixed-lineage leukemia (trithorax homolog, Drosophila); translocated to, 6 | 0               | 2               | 0                | -3.712614           |
| 30   | 234967  | Slc36a4       | solute carrier family 36 (proton/amino acid symporter), member 4                               | 0               | 2               | 0                | -3.498919           |

Candidates for positive regulators of oncogenic growth (DESeq)

| Rank | entrez# | Gene Symbol   | Gene name                                                          | enriched shRNAs | depleted shRNAs | no change shRNAs | average Fold Change |
|------|---------|---------------|--------------------------------------------------------------------|-----------------|-----------------|------------------|---------------------|
| 31   | 66078   | Tsen34        | tRNA splicing endonuclease 34 homolog (S. cerevisiae)              | 0               | 2               | 0                | -3.489445           |
| 32   | 382985  | Rrm2b         | ribonucleotide reductase M2 B (TP53 inducible)                     | 0               | 2               | 0                | -3.375817           |
| 33   | 64929   | Scel          | sciellin                                                           | 0               | 2               | 0                | -3.372655           |
| 34   | 69786   | Tprkb         | Tp53rk binding protein                                             | 0               | 2               | 0                | -3.301148           |
| 35   | 58249   | Fibp          | fibroblast growth factor (acidic) intracellular binding protein    | 0               | 2               | 0                | -3.263401           |
| 36   | 20971   | Sdc4          | syndecan 4                                                         | 0               | 2               | 0                | -3.247902           |
| 37   | 68055   | Atp5s         | ATP synthase, H+ transporting, mitochondrial F0 complex, subunit s | 0               | 2               | 0                | -3.184875           |
| 38   | 20103   | Rps5          | ribosomal protein S5                                               | 0               | 2               | 0                | -3.177766           |
| 39   | 17904   | Myl6          | myosin, light polypeptide 6, alkali, smooth muscle and non-muscle  | 0               | 2               | 0                | -3.170266           |
| 40   | 11461   | Actb          | actin, beta                                                        | 0               | 2               | 0                | -3.140525           |
| 41   | 67205   | Utp11l        | UTP11-like, U3 small nucleolar ribonucleoprotein, (yeast)          | 0               | 2               | 0                | -3.083366           |
| 42   | 83679   | Pde4dip       | phosphodiesterase 4D interacting protein (myomegalin)              | 0               | 2               | 0                | -3.069466           |
| 43   | 19946   | Rpl30         | ribosomal protein L30                                              | 0               | 2               | 0                | -3.064526           |
| 44   | 16175   | Il1a          | interleukin 1 alpha                                                | 0               | 2               | 0                | -3.044574           |
| 45   | 12370   | Casp8         | caspase 8                                                          | 0               | 2               | 0                | -3.030518           |
| 46   | 54637   | Praf2         | PRA1 domain family 2                                               | 0               | 2               | 0                | -3.021195           |
| 47   | 22032   | Traf4         | TNF receptor associated factor 4                                   | 0               | 2               | 0                | -3.013076           |
| 48   | 20024   | Sub1          | SUB1 homolog (S. cerevisiae)                                       | 0               | 2               | 0                | -2.98058            |
| 49   | 71881   | 2310001A20Rik | RIKEN cDNA 2310001A20 gene                                         | 0               | 2               | 0                | -2.94657            |
| 50   | 78308   | Gpr108        | G protein-coupled receptor 108                                     | 0               | 2               | 0                | -2.945147           |
| 51   | 15929   | ldh3g         | isocitrate dehydrogenase 3 (NAD+), gamma                           | 0               | 2               | 0                | -2.940022           |
| 52   | 107767  | Scamp1        | secretory carrier membrane protein 1                               | 0               | 2               | 0                | -2.916582           |
| 53   | 94181   | Nans          | N-acetylneuraminic acid synthase (sialic acid synthase)            | 0               | 2               | 0                | -2.916317           |
| 54   | 20409   | Ostf1         | osteoclast stimulating factor 1                                    | 0               | 2               | 0                | -2.914364           |
| 55   | 15587   | Hyal2         | hyaluronoglucosaminidase 2                                         | 0               | 2               | 0                | -2.863063           |
| 56   | 11983   | Atpif1        | ATPase inhibitory factor 1                                         | 0               | 2               | 0                | -2.85331            |
| 57   | 22154   | Tubb5         | tubulin, beta 5 class I                                            | 0               | 2               | 0                | -2.85207            |
| 58   | 68134   | Upf3b         | UPF3 regulator of nonsense transcripts homolog B (yeast)           | 0               | 2               | 0                | -2.848585           |
| 59   | 19951   | Rpl32         | ribosomal protein L32                                              | 0               | 2               | 0                | -2.836481           |
| 60   | 19336   | Rab24         | RAB24, member RAS oncogene family                                  | 0               | 2               | 0                | -2.835622           |
| 61   | 55981   | Pigb          | phosphatidylinositol glycan anchor biosynthesis, class B           | 0               | 2               | 0                | -2.834769           |
| 62   | 72133   | Trub1         | TruB pseudouridine (psi) synthase homolog 1 (E. coli)              | 0               | 2               | 0                | -2.826572           |
| 63   | 107568  | Wwp1          | WW domain containing E3 ubiquitin protein ligase 1                 | 0               | 2               | 0                | -2.779715           |
| 64   | 208518  | Cep78         | centrosomal protein 78                                             | 0               | 2               | 0                | -2.731514           |

Candidates for positive regulators of oncogenic growth (DESeq)

| Rank | entrez# | Gene Symbol | Gene name                                                                 | enriched shRNAs | depleted shRNAs | no change shRNAs | average Fold Change |
|------|---------|-------------|---------------------------------------------------------------------------|-----------------|-----------------|------------------|---------------------|
| 65   | 226043  | Cbwd1       | COBW domain containing 1                                                  | 0               | 2               | 0                | -2.72242            |
| 66   | 228410  | Cstf3       | cleavage stimulation factor, 3' pre-RNA, subunit 3                        | 0               | 2               | 0                | -2.712224           |
| 67   | 14156   | Fen1        | flap structure specific endonuclease 1                                    | 0               | 2               | 0                | -2.710883           |
| 68   | 67281   | Rpl37       | ribosomal protein L37                                                     | 0               | 2               | 0                | -2.692699           |
| 69   | 23938   | Map2k5      | mitogen-activated protein kinase kinase 5                                 | 0               | 2               | 0                | -2.680126           |
| 70   | 29870   | Gtse1       | G two S phase expressed protein 1                                         | 0               | 2               | 0                | -2.679875           |
| 71   | 14137   | Fdft1       | farnesyl diphosphate farnesyl transferase 1                               | 0               | 2               | 0                | -2.653879           |
| 72   | 14694   | Gnb2l1      | guanine nucleotide binding protein (G protein), beta polypeptide 2 like 1 | 0               | 2               | 0                | -2.636517           |
| 73   | 114774  | Pawr        | PRKC, apoptosis, WT1, regulator                                           | 0               | 2               | 0                | -2.615131           |
| 74   | 68755   | Cgrrf1      | cell growth regulator with ring finger domain 1                           | 0               | 2               | 0                | -2.610989           |
| 75   | 219103  | Cenpj       | centromere protein J                                                      | 0               | 2               | 0                | -2.578647           |
| 76   | 224045  | Eif2b5      | eukaryotic translation initiation factor 2B, subunit 5 epsilon            | 0               | 2               | 0                | -2.57717            |
| 77   | 78816   | Gmip        | Gem-interacting protein                                                   | 0               | 2               | 0                | -2.567097           |
| 78   | 13135   | Dad1        | defender against cell death 1                                             | 0               | 2               | 0                | -2.546705           |
| 79   | 15525   | Hspa4       | heat shock protein 4                                                      | 0               | 2               | 0                | -2.543569           |
| 80   | 60406   | Sap30       | sin3 associated polypeptide                                               | 0               | 2               | 0                | -2.541804           |
| 81   | 19384   | Ran         | RAN, member RAS oncogene family                                           | 0               | 2               | 0                | -2.540966           |
| 82   | 12579   | Cdkn2b      | cyclin-dependent kinase inhibitor 2B (p15, inhibits CDK4)                 | 0               | 2               | 0                | -2.530074           |
| 83   | 107686  | Snrpd2      | small nuclear ribonucleoprotein D2                                        | 0               | 2               | 0                | -2.522211           |
| 84   | 67689   | Aldh3b1     | aldehyde dehydrogenase 3 family, member B1                                | 0               | 2               | 0                | -2.517537           |
| 85   | 20022   | Polr2j      | polymerase (RNA) II (DNA directed) polypeptide J                          | 0               | 2               | 0                | -2.492666           |
| 86   | 27207   | Rps11       | ribosomal protein S11                                                     | 0               | 2               | 0                | -2.480417           |
| 87   | 19822   | Rnf4        | ring finger protein 4                                                     | 0               | 2               | 0                | -2.464901           |
| 88   | 17448   | Mdh2        | malate dehydrogenase 2, NAD (mitochondrial)                               | 0               | 2               | 0                | -2.450353           |
| 89   | 13730   | Emp1        | epithelial membrane protein 1                                             | 0               | 2               | 0                | -2.44541            |
| 90   | 105675  | Ppif        | peptidylprolyl isomerase F (cyclophilin F)                                | 0               | 2               | 0                | -2.439222           |
| 91   | 228545  | Vps18       | vacuolar protein sorting 18 (yeast)                                       | 0               | 2               | 0                | -2.429264           |
| 92   | 15932   | Idua        | iduronidase, alpha-L-                                                     | 0               | 2               | 0                | -2.409139           |
| 93   | 13033   | Ctsd        | cathepsin D                                                               | 0               | 2               | 0                | -2.398762           |
| 94   | 70101   | Cyp4f16     | cytochrome P450, family 4, subfamily f, polypeptide 16                    | 0               | 2               | 0                | -2.379271           |
| 95   | 56417   | Adar        | adenosine deaminase, RNA-specific                                         | 0               | 2               | 0                | -2.373014           |
| 96   | 15980   | Ifngr2      | interferon gamma receptor 2                                               | 0               | 2               | 0                | -2.367999           |
| 97   | 23950   | Dnajb6      | DnaJ (Hsp40) homolog, subfamily B, member 6                               | 0               | 2               | 0                | -2.363662           |
| 98   | 11844   | Arf5        | ADP-ribosylation factor 5                                                 | 0               | 2               | 0                | -2.363108           |

Candidates for positive regulators of oncogenic growth (DESeq)

| Rank | entrez# | Gene Symbol   | Gene name                                                                                         | enriched shRNAs | depleted shRNAs | no change shRNAs | average Fold Change |
|------|---------|---------------|---------------------------------------------------------------------------------------------------|-----------------|-----------------|------------------|---------------------|
| 99   | 75735   | Pank1         | pantothenate kinase 1                                                                             | 0               | 2               | 0                | -2.361488           |
| 100  | 67338   | Rffl          | ring finger and FYVE like domain containing protein                                               | 0               | 2               | 0                | -2.324452           |
| 101  | 74202   | Fblim1        | filamin binding LIM protein 1                                                                     | 0               | 2               | 0                | -2.321249           |
| 102  | 20437   | Siah1a        | seven in absentia 1A                                                                              | 0               | 2               | 0                | -2.307286           |
| 103  | 72198   | Skiv2l2       | superkiller viralicidic activity 2-like 2 ( <i>S. cerevisiae</i> )                                | 0               | 2               | 0                | -2.296714           |
| 104  | 22388   | Wdr1          | WD repeat domain 1                                                                                | 0               | 2               | 0                | -2.285061           |
| 105  | 12406   | Serpinh1      | serine (or cysteine) peptidase inhibitor, clade H, member 1                                       | 0               | 2               | 0                | -2.280153           |
| 106  | 81898   | Sf3b1         | splicing factor 3b, subunit 1                                                                     | 0               | 2               | 0                | -2.271514           |
| 107  | 24075   | Taf10         | TAF10 RNA polymerase II, TATA box binding protein (TBP)-associated factor                         | 0               | 2               | 0                | -2.269374           |
| 108  | 70584   | Pak4          | p21 protein (Cdc42/Rac)-activated kinase 4                                                        | 0               | 2               | 0                | -2.261308           |
| 109  | 67439   | Xab2          | XPA binding protein 2                                                                             | 0               | 2               | 0                | -2.249503           |
| 110  | 53885   | Nphp1         | nephronophthisis 1 (juvenile) homolog (human)                                                     | 0               | 2               | 0                | -2.235107           |
| 111  | 16451   | Jak1          | Janus kinase 1                                                                                    | 0               | 2               | 0                | -2.232868           |
| 112  | 68365   | Rab14         | RAB14, member RAS oncogene family                                                                 | 0               | 2               | 0                | -2.20973            |
| 113  | 13506   | Dsc2          | desmocollin 2                                                                                     | 0               | 2               | 0                | -2.20773            |
| 114  | 27061   | Bcap31        | B cell receptor associated protein 31                                                             | 0               | 2               | 0                | -2.175508           |
| 115  | 114663  | Impa2         | inositol (myo)-1(or 4)-monophosphatase 2                                                          | 0               | 2               | 0                | -2.15429            |
| 116  | 12527   | Cd9           | CD9 antigen                                                                                       | 0               | 2               | 0                | -2.144156           |
| 117  | 20133   | Rrm1          | ribonucleotide reductase M1                                                                       | 0               | 2               | 0                | -2.143485           |
| 118  | 494124  | Calm5         | calmodulin 5                                                                                      | 0               | 2               | 0                | -2.103088           |
| 119  | 14897   | Trip12        | thyroid hormone receptor interactor 12                                                            | 0               | 2               | 0                | -2.096929           |
| 120  | 16443   | Itns1         | intersectin 1 (SH3 domain protein 1A)                                                             | 0               | 2               | 0                | -2.096191           |
| 121  | 12466   | Cct6a         | chaperonin containing Tcp1, subunit 6a (zeta)                                                     | 0               | 2               | 0                | -2.085344           |
| 122  | 218820  | Zfp503        | zinc finger protein 503                                                                           | 0               | 2               | 0                | -2.083018           |
| 123  | 17756   | Mtap2         | microtubule-associated protein 2                                                                  | 0               | 2               | 0                | -2.068454           |
| 124  | 69540   | Klk10         | kallikrein related-peptidase 10                                                                   | 0               | 2               | 0                | -2.065693           |
| 125  | 66993   | Smarcd3       | SWI/SNF related, matrix associated, actin dependent regulator of chromatin, subfamily d, member 3 | 0               | 2               | 0                | -2.057363           |
| 126  | 66860   | Tanc1         | tetratricopeptide repeat, ankyrin repeat and coiled-coil containing 1                             | 0               | 2               | 0                | -2.054888           |
| 127  | 20815   | Srpk1         | serine/arginine-rich protein specific kinase 1                                                    | 0               | 2               | 0                | -2.045431           |
| 128  | 13663   | Ei24          | etoposide induced 2.4 mRNA                                                                        | 0               | 2               | 0                | -2.042968           |
| 129  | 329908  | Usp24         | ubiquitin specific peptidase 24                                                                   | 0               | 2               | 0                | -2.036511           |
| 130  | 232201  | Arhgap25      | Rho GTPase activating protein 25                                                                  | 0               | 2               | 0                | -2.03199            |
| 131  | 27362   | Dnajb9        | DnaJ (Hsp40) homolog, subfamily B, member 9                                                       | 0               | 2               | 0                | -2.02858            |
| 132  | 67217   | 2810055F11Rik | RIKEN cDNA 2810055F11 gene                                                                        | 0               | 2               | 0                | -2.012176           |

Candidates for positive regulators of oncogenic growth (DESeq)

| Rank | entrez# | Gene Symbol   | Gene name                                                         | enriched shRNAs | depleted shRNAs | no change shRNAs | average Fold Change |
|------|---------|---------------|-------------------------------------------------------------------|-----------------|-----------------|------------------|---------------------|
| 133  | 11793   | Atg5          | autophagy-related 5 (yeast)                                       | 0               | 2               | 0                | -2.00712            |
| 134  | 112405  | Egln1         | EGL nine homolog 1 (C. elegans)                                   | 0               | 2               | 0                | -1.991391           |
| 135  | 17865   | Mybl2         | myeloblastosis oncogene-like 2                                    | 0               | 2               | 0                | -1.982642           |
| 136  | 21888   | Tie4          | transducin-like enhancer of split 4, homolog of Drosophila E(spl) | 0               | 2               | 0                | -1.955746           |
| 137  | 70052   | Prpf4         | PRP4 pre-mRNA processing factor 4 homolog (yeast)                 | 0               | 2               | 0                | -1.950804           |
| 138  | 21354   | Tap1          | transporter 1, ATP-binding cassette, sub-family B (MDR/TAP)       | 0               | 2               | 0                | -1.94664            |
| 139  | 214505  | Gnptg         | N-acetylglucosamine-1-phosphotransferase, gamma subunit           | 0               | 2               | 0                | -1.934422           |
| 140  | 73046   | Glr5          | glutaredoxin 5 homolog (S. cerevisiae)                            | 0               | 2               | 0                | -1.921989           |
| 141  | 15183   | Hdac3         | histone deacetylase 3                                             | 0               | 2               | 0                | -1.921237           |
| 142  | 21374   | Tbp           | TATA box binding protein                                          | 0               | 2               | 0                | -1.920274           |
| 143  | 14859   | Gsta3         | glutathione S-transferase, alpha 3                                | 0               | 2               | 0                | -1.88372            |
| 144  | 67500   | Ccar1         | cell division cycle and apoptosis regulator 1                     | 0               | 2               | 0                | -1.873752           |
| 145  | 227746  | Rabepk        | Rab9 effector protein with kelch motifs                           | 0               | 2               | 0                | -1.864275           |
| 146  | 57810   | Cdon          | cell adhesion molecule-related/down-regulated by oncogenes        | 0               | 2               | 0                | -1.832443           |
| 147  | 67728   | Dph2          | DPH2 homolog (S. cerevisiae)                                      | 0               | 2               | 0                | -1.818795           |
| 148  | 69953   | 2810025M15Rik | RIKEN cDNA 2810025M15 gene                                        | 0               | 2               | 0                | -1.801606           |
| 149  | 11857   | Arhgdib       | Rho, GDP dissociation inhibitor (GDI) beta                        | 0               | 2               | 0                | -1.779759           |
| 150  | 114565  | Zfp295        | zinc finger protein 295                                           | 0               | 2               | 0                | -1.728715           |
| 151  | 16832   | Ldhd          | lactate dehydrogenase B                                           | 0               | 2               | 0                | -1.728576           |
| 152  | 18195   | Nsf           | N-ethylmaleimide sensitive fusion protein                         | 0               | 2               | 0                | -1.725145           |
| 153  | 54198   | Snx3          | sorting nexin 3                                                   | 0               | 2               | 0                | -1.698583           |
| 154  | 19300   | Abcd4         | ATP-binding cassette, sub-family D (ALD), member 4                | 0               | 2               | 0                | -1.690722           |
| 155  | 71393   | Kctd6         | potassium channel tetramerisation domain containing 6             | 0               | 2               | 0                | -1.690584           |
| 156  | 53621   | Cnot4         | CCR4-NOT transcription complex, subunit 4                         | 0               | 2               | 0                | -1.679797           |
| 157  | 14634   | Gli3          | GLI-Kruppel family member GLI3                                    | 0               | 2               | 0                | -1.608601           |
| 158  | 70349   | Copb1         | coatamer protein complex, subunit beta 1                          | 0               | 2               | 0                | -1.606087           |
| 159  | 26886   | Cenph         | centromere protein H                                              | 0               | 2               | 0                | -1.526953           |
| 160  | 23797   | Akt3          | thymoma viral proto-oncogene 3                                    | 0               | 2               | 0                | -1.440133           |
| 161  | 16204   | Fabp6         | fatty acid binding protein 6, ileal (gastrotropin)                | 0               | 2               | 0                | -1.422833           |
| 162  | 66701   | Spryd4        | SPRY domain containing 4                                          | 0               | 2               | 0                | -1.415484           |
| 163  | 74585   | Sppl3         | signal peptide peptidase 3                                        | 0               | 2               | 0                | -1.03727            |

## Candidates for negative regulators of oncogenic growth (DESeq)

| Rank | entrez# | Gene Symbol   | Gene name                                                                                   | enriched shRNAs | depleted shRNAs | no change shRNAs | average Fold Change |
|------|---------|---------------|---------------------------------------------------------------------------------------------|-----------------|-----------------|------------------|---------------------|
| 1    | 56462   | Mtch1         | mitochondrial carrier homolog 1 (C. elegans)                                                | 2               | 0               | 0                | 5.150296            |
| 2    | 14609   | Gja1          | gap junction protein, alpha 1                                                               | 2               | 0               | 0                | 4.937435            |
| 3    | 14381   | G6pdx         | glucose-6-phosphate dehydrogenase X-linked                                                  | 2               | 0               | 0                | 4.63813             |
| 4    | 56289   | Rassf1        | Ras association (RalGDS/AF-6) domain family member 1                                        | 2               | 0               | 0                | 4.262562            |
| 5    | 14957   | Hist1h1d      | histone cluster 1, H1d                                                                      | 2               | 0               | 0                | 4.148987            |
| 6    | 64136   | Sdf2l1        | stromal cell-derived factor 2-like 1                                                        | 2               | 0               | 0                | 3.817014            |
| 7    | 11758   | Prdx6         | peroxiredoxin 6                                                                             | 3               | 0               | 0                | 3.670943            |
| 8    | 140721  | Caskin2       | CASK-interacting protein 2                                                                  | 2               | 0               | 0                | 3.548683            |
| 9    | 18117   | Cox4nb        | COX4 neighbor                                                                               | 2               | 0               | 0                | 3.512259            |
| 10   | 19240   | Tmsb10        | thymosin, beta 10                                                                           | 3               | 0               | 0                | 3.463588            |
| 11   | 22333   | Vdac1         | voltage-dependent anion channel 1                                                           | 2               | 0               | 0                | 3.348978            |
| 12   | 20912   | Stxbp3a       | syntaxin binding protein 3A                                                                 | 2               | 0               | 0                | 3.310092            |
| 13   | 12514   | Cd68          | CD68 antigen                                                                                | 2               | 0               | 0                | 2.926897            |
| 14   | 23808   | Ash2l         | ash2 (absent, small, or homeotic)-like (Drosophila)                                         | 2               | 0               | 0                | 2.912088            |
| 15   | 53328   | Pgrmc1        | progesterone receptor membrane component 1                                                  | 2               | 0               | 0                | 2.905557            |
| 16   | 170750  | Xpnpep1       | X-prolyl aminopeptidase (aminopeptidase P) 1, soluble                                       | 2               | 0               | 0                | 2.836124            |
| 17   | 24071   | Synj2bp       | synaptojanin 2 binding protein                                                              | 2               | 0               | 0                | 2.765778            |
| 18   | 11804   | Aplp2         | amyloid beta (A4) precursor-like protein 2                                                  | 2               | 0               | 0                | 2.748337            |
| 19   | 69029   | 1500032L24Rik | RIKEN cDNA 1500032L24 gene                                                                  | 2               | 0               | 0                | 2.656156            |
| 20   | 23856   | Dido1         | death inducer-obliterator 1                                                                 | 2               | 0               | 0                | 2.655234            |
| 21   | 21838   | Thy1          | thymus cell antigen 1, theta                                                                | 2               | 0               | 0                | 2.646249            |
| 22   | 14199   | Fhl1          | four and a half LIM domains 1                                                               | 2               | 0               | 0                | 2.624509            |
| 23   | 215748  | Cnksr3        | Cnksr family member 3                                                                       | 2               | 0               | 0                | 2.577662            |
| 24   | 229445  | Ctso          | cathepsin O                                                                                 | 2               | 0               | 0                | 2.561291            |
| 25   | 240672  | Dusp5         | dual specificity phosphatase 5                                                              | 2               | 0               | 0                | 2.532042            |
| 26   | 66177   | Ubl5          | ubiquitin-like 5                                                                            | 2               | 0               | 0                | 2.519894            |
| 27   | 23991   | Cib1          | calcium and integrin binding 1 (calmyrin)                                                   | 2               | 0               | 0                | 2.491497            |
| 28   | 66665   | 5730528L13Rik | RIKEN cDNA 5730528L13 gene                                                                  | 2               | 0               | 0                | 2.485449            |
| 29   | 214601  | Slc10a3       | solute carrier family 10 (sodium/bile acid cotransporter family), member 3                  | 3               | 0               | 0                | 2.356519            |
| 30   | 22612   | Yes1          | Yamaguchi sarcoma viral (v-yes) oncogene homolog 1                                          | 2               | 0               | 0                | 2.343623            |
| 31   | 56419   | Diap3         | diaphanous homolog 3 (Drosophila)                                                           | 2               | 0               | 0                | 2.337557            |
| 32   | 22627   | Ywhae         | tyrosine 3-monooxygenase/tryptophan 5-monooxygenase activation protein, epsilon polypeptide | 2               | 0               | 0                | 2.333405            |
| 33   | 72349   | Dusp3         | dual specificity phosphatase 3 (vaccinia virus phosphatase VH1-related)                     | 2               | 0               | 0                | 2.322377            |
| 34   | 227800  | Rabgap1       | RAB GTPase activating protein 1                                                             | 2               | 0               | 0                | 2.321058            |

Candidates for negative regulators of oncogenic growth (DESeq)

| Rank | entrez# | Gene Symbol   | Gene name                                                    | enriched shRNAs | depleted shRNAs | no change shRNAs | average Fold Change |
|------|---------|---------------|--------------------------------------------------------------|-----------------|-----------------|------------------|---------------------|
| 35   | 73720   | Cst6          | cystatin E/M                                                 | 2               | 0               | 0                | 2.309278            |
| 36   | 68185   | Chchd8        | coiled-coil-helix-coiled-coil-helix domain containing 8      | 2               | 0               | 0                | 2.299877            |
| 37   | 12497   | Entpd6        | ectonucleoside triphosphate diphosphohydrolase 6             | 2               | 0               | 0                | 2.271208            |
| 38   | 18203   | Ntan1         | N-terminal Asn amidase                                       | 2               | 0               | 0                | 2.263622            |
| 39   | 330361  | AW146020      | expressed sequence AW146020                                  | 2               | 0               | 0                | 2.225839            |
| 40   | 71446   | Wrb           | tryptophan rich basic protein                                | 2               | 0               | 0                | 2.188306            |
| 41   | 106393  | Srl           | sarcalumenin                                                 | 2               | 0               | 0                | 2.149767            |
| 42   | 17423   | Ndst2         | N-deacetylase/N-sulfotransferase (heparan glucosaminyl) 2    | 2               | 0               | 0                | 2.120654            |
| 43   | 65079   | Rtn4r         | reticulon 4 receptor                                         | 3               | 0               | 0                | 2.102539            |
| 44   | 21419   | Tcfap2b       | transcription factor AP-2 beta                               | 2               | 0               | 0                | 2.088474            |
| 45   | 71780   | Isyna1        | myo-inositol 1-phosphate synthase A1                         | 2               | 0               | 0                | 2.042152            |
| 46   | 15902   | Id2           | inhibitor of DNA binding 2                                   | 2               | 0               | 0                | 2.019157            |
| 47   | 11477   | Acvr1         | activin A receptor, type 1                                   | 2               | 0               | 0                | 1.946922            |
| 48   | 76608   | Hectd3        | HECT domain containing 3                                     | 2               | 0               | 0                | 1.940368            |
| 49   | 11479   | Acvr1b        | activin A receptor, type 1B                                  | 2               | 0               | 0                | 1.93593             |
| 50   | 71069   | Stox2         | storkhead box 2                                              | 2               | 0               | 0                | 1.913461            |
| 51   | 72085   | Osgepl1       | O-sialoglycoprotein endopeptidase-like 1                     | 3               | 0               | 0                | 1.890805            |
| 52   | 71745   | Cul2          | cullin 2                                                     | 2               | 0               | 0                | 1.843776            |
| 53   | 68219   | Nudt21        | nudix (nucleoside diphosphate linked moiety X)-type motif 21 | 2               | 0               | 0                | 1.814787            |
| 54   | 66839   | 0610009O20Rik | RIKEN cDNA 0610009O20 gene                                   | 2               | 0               | 0                | 1.803024            |
| 55   | 72141   | Adpgk         | ADP-dependent glucokinase                                    | 2               | 0               | 0                | 1.802917            |
| 56   | 79044   | Mrps34        | mitochondrial ribosomal protein S34                          | 2               | 0               | 0                | 1.801459            |
| 57   | 12042   | Bcl10         | B cell leukemia/lymphoma 10                                  | 2               | 0               | 0                | 1.778075            |
| 58   | 19084   | Prkar1a       | protein kinase, cAMP dependent regulatory, type I, alpha     | 2               | 0               | 0                | 1.712054            |
| 59   | 15159   | Hccs          | holocytochrome c synthetase                                  | 2               | 0               | 0                | 1.705887            |
| 60   | 11828   | Aqp3          | aquaporin 3                                                  | 2               | 0               | 0                | 1.699845            |
| 61   | 56440   | Snx1          | sorting nexin 1                                              | 2               | 0               | 0                | 1.668303            |
| 62   | 26951   | Zw10          | ZW10 homolog (Drosophila), centromere/kinetochore protein    | 2               | 0               | 0                | 1.658931            |
| 63   | 11465   | Actg1         | actin, gamma, cytoplasmic 1                                  | 2               | 0               | 0                | 1.65531             |
| 64   | 67145   | Tomm34        | translocase of outer mitochondrial membrane 34               | 3               | 0               | 0                | 1.591692            |
| 65   | 268564  | Zbtb1         | zinc finger and BTB domain containing 1                      | 2               | 0               | 0                | 1.56918             |
| 66   | 20688   | Sp4           | trans-acting transcription factor 4                          | 2               | 0               | 0                | 1.566193            |
| 67   | 12816   | Col12a1       | collagen, type XII, alpha 1                                  | 2               | 0               | 0                | 1.563503            |
| 68   | 66826   | Taz           | tafazzin                                                     | 2               | 0               | 0                | 1.562961            |

Candidates for negative regulators of oncogenic growth (DESeq)

| Rank | entrez# | Gene Symbol | Gene name                                   | enriched shRNAs | depleted shRNAs | no change shRNAs | average Fold Change |
|------|---------|-------------|---------------------------------------------|-----------------|-----------------|------------------|---------------------|
| 69   | 70454   | Cenpl       | centromere protein L                        | 2               | 0               | 0                | 1.544397            |
| 70   | 19691   | Recql       | RecQ protein-like                           | 2               | 0               | 0                | 1.543099            |
| 71   | 338367  | Myo1d       | myosin ID                                   | 2               | 0               | 0                | 1.523257            |
| 72   | 66943   | Pqlc1       | PQ loop repeat containing 1                 | 2               | 0               | 0                | 1.448255            |
| 73   | 230661  | Tesk2       | testis-specific kinase 2                    | 2               | 0               | 0                | 1.447342            |
| 74   | 67778   | Zfp639      | zinc finger protein 639                     | 2               | 0               | 0                | 1.440194            |
| 75   | 66079   | Tmem42      | transmembrane protein 42                    | 2               | 0               | 0                | 1.377148            |
| 76   | 232314  | Ppp4r2      | protein phosphatase 4, regulatory subunit 2 | 2               | 0               | 0                | 1.373663            |
| 77   | 18521   | Pcbp2       | poly(rC) binding protein 2                  | 2               | 0               | 0                | 1.365813            |
| 78   | 67095   | Trak1       | trafficking protein, kinesin binding 1      | 2               | 0               | 0                | 1.312791            |
| 79   | 215615  | Rnpep       | arginyl aminopeptidase (aminopeptidase B)   | 2               | 0               | 0                | 1.311754            |
| 80   | 11431   | Acp1        | acid phosphatase 1, soluble                 | 2               | 0               | 0                | 1.187072            |
| 81   | 15161   | Hcfc1       | host cell factor C1                         | 2               | 0               | 0                | 1.10549             |



### Supplementary Table 4. Putative regulators of oncogenic growth identified by Fisher's exact test of pooled samples.

Note: Candidates identified by both DESeq and Fisher's exact test are highlighted in green.

Candidates for positive regulators of oncogenic growth (Fisher's)

| Rank | entrez# | Gene Symbol       | Gene name                                                                                      | enriched shRNAs | depleted shRNAs | no change shRNAs | average Fold Change |
|------|---------|-------------------|------------------------------------------------------------------------------------------------|-----------------|-----------------|------------------|---------------------|
| 1    | 12387   | Ctnnb1            | catenin (cadherin-associated protein), beta 1, 88kDa                                           | 0               | 5               | 0                | -3.60994            |
| 2    | 23797   | Akt3              | v-akt murine thymoma viral oncogene homolog 3 (protein kinase B, gamma)                        | 0               | 4               | 6                | -1.48674            |
| 3    | 68836   | Mrpl52            | mitochondrial ribosomal protein L52                                                            | 0               | 3               | 1                | -2.99207            |
| 4    | 268449  | Rpl23a            | ribosomal protein L23A                                                                         | 0               | 3               | 2                | -2.87292            |
| 5    | 110157  | Raf1              | v-raf-1 murine leukemia viral oncogene homolog 1                                               | 0               | 3               | 7                | -2.3608             |
| 6    | 77116   | Mtmr2             | myotubularin related protein 2                                                                 | 0               | 3               | 2                | -2.23639            |
| 7    | 246198  | Mllt6             | myeloid/lymphoid or mixed-lineage leukemia (trithorax homolog, Drosophila); translocated to, 6 | 0               | 3               | 2                | -2.17635            |
| 8    | 114774  | Pawr              | PRKC, apoptosis, WT1, regulator                                                                | 0               | 3               | 2                | -2.17517            |
| 9    | 93890   | Pcdhb19           | protocadherin beta 11                                                                          | 0               | 3               | 2                | -2.14404            |
| 10   | 51813   | Ccnc              | cyclin C                                                                                       | 0               | 3               | 2                | -2.13849            |
| 11   | 20971   | Sdc4              | syndecan 4                                                                                     | 0               | 3               | 2                | -2.13573            |
| 12   | 13730   | Emp1              | epithelial membrane protein 1                                                                  | 0               | 3               | 2                | -2.09697            |
| 13   | 98386   | Lbr               | lamin B receptor                                                                               | 0               | 3               | 2                | -2.06861            |
| 14   | 69656   | Pir               | pirin (iron-binding nuclear protein)                                                           | 0               | 3               | 2                | -1.96175            |
| 15   | 22388   | Wdr1              | WD repeat domain 1                                                                             | 0               | 3               | 1                | -1.95957            |
| 16   | 28000   | Prpf19            | PRP19/PSO4 pre-mRNA processing factor 19 homolog (S. cerevisiae)                               | 0               | 3               | 2                | -1.89974            |
| 17   | 74202   | Fblim1            | filamin binding LIM protein 1                                                                  | 0               | 3               | 2                | -1.85599            |
| 18   | 16176   | Il1b              | interleukin 1, beta                                                                            | 0               | 3               | 2                | -1.84088            |
| 19   | 101197  | Zfp956 (A1894139) | zinc finger protein 956                                                                        | 0               | 3               | 2                | -1.83174            |
| 20   | 320100  | Relt (Tnfrsf19l)  | RELT tumor necrosis factor receptor                                                            | 0               | 3               | 2                | -1.81627            |
| 21   | 22154   | Tubb5             | tubulin, beta class I                                                                          | 0               | 3               | 2                | -1.80672            |
| 22   | 81898   | Sf3b1             | splicing factor 3b, subunit 1, 155kDa                                                          | 0               | 3               | 2                | -1.80285            |
| 23   | 19336   | Rab24             | RAB24, member RAS oncogene family                                                              | 0               | 3               | 2                | -1.77865            |
| 24   | 12544   | Cdc45 (Cdc45l)    | cell division cycle 45 homolog (S. cerevisiae)                                                 | 0               | 3               | 2                | -1.75888            |
| 25   | 55981   | Pigb              | phosphatidylinositol glycan anchor biosynthesis, class B                                       | 0               | 3               | 2                | -1.75676            |
| 26   | 18195   | Nsf               | N-ethylmaleimide-sensitive factor                                                              | 0               | 3               | 2                | -1.7189             |
| 27   | 15183   | Hdac3             | histone deacetylase 3                                                                          | 0               | 3               | 2                | -1.66183            |
| 28   | 14859   | Gsta3             | glutathione S-transferase alpha 3                                                              | 0               | 3               | 2                | -1.63366            |
| 29   | 18628   | Per3              | period homolog 3 (Drosophila)                                                                  | 0               | 3               | 2                | -1.62419            |
| 30   | 16443   | Itsn1             | intersectin 1 (SH3 domain protein)                                                             | 0               | 3               | 7                | -1.59483            |
| 31   | 19364   | Rad51l3           | RAD51 homolog D (S. cerevisiae)                                                                | 0               | 3               | 1                | -1.59235            |
| 32   | 27362   | Dnajb9            | DnaJ (Hsp40) homolog, subfamily B, member 9                                                    | 0               | 3               | 2                | -1.4556             |
| 33   | 15461   | Hras1             | v-Ha-ras Harvey rat sarcoma viral oncogene homolog                                             | 0               | 3               | 2                | -1.41727            |

Candidates for positive regulators of oncogenic growth (Fisher's)

| Rank | entrez# | Gene Symbol           | Gene name                                                               | enriched shRNAs | depleted shRNAs | no change shRNAs | average Fold Change |
|------|---------|-----------------------|-------------------------------------------------------------------------|-----------------|-----------------|------------------|---------------------|
| 34   | 72193   | Scaf11 (Sfrs2ip)      | SR-related CTD-associated factor 11                                     | 0               | 3               | 2                | -1.40599            |
| 35   | 56417   | Adar                  | adenosine deaminase, RNA-specific                                       | 0               | 3               | 2                | -1.39486            |
| 36   | 12014   | Bach2                 | BTB and CNC homology 1, basic leucine zipper transcription factor 2     | 0               | 3               | 2                | -1.38942            |
| 37   | 105675  | Ppif                  | peptidylprolyl isomerase F                                              | 0               | 3               | 2                | -1.37636            |
| 38   | 108837  | Ibtk                  | inhibitor of Bruton agammaglobulinemia tyrosine kinase                  | 0               | 3               | 2                | -1.37515            |
| 39   | 16885   | Limk1                 | LIM domain kinase 1                                                     | 0               | 3               | 2                | -1.31093            |
| 40   | 71710   | Lrrcc1                | leucine rich repeat and coiled-coil centrosomal protein 1               | 0               | 3               | 2                | -1.30101            |
| 41   | 20103   | Rps5                  | ribosomal protein S5                                                    | 0               | 3               | 2                | -1.29185            |
| 42   | 17218   | Mcm5                  | minichromosome maintenance complex component 5                          | 0               | 3               | 2                | -1.28398            |
| 43   | 68052   | Rps13                 | ribosomal protein S13                                                   | 0               | 3               | 2                | -1.28174            |
| 44   | 20403   | Itns2                 | intersectin 2                                                           | 0               | 3               | 2                | -1.28122            |
| 45   | 225929  | Pat1 (AV312086)       | protein associated with topoisomerase II homolog 1 (yeast)              | 0               | 3               | 2                | -1.2267             |
| 46   | 16330   | Inpp5b                | inositol polyphosphate-5-phosphatase, 75kDa                             | 0               | 3               | 2                | -1.22204            |
| 47   | 76281   | Tax1bp3               | Tax1 (human T-cell leukemia virus type I) binding protein 3             | 0               | 3               | 2                | -1.2138             |
| 48   | 26441   | Psma4                 | proteasome (prosome, macropain) subunit, alpha type, 4                  | 0               | 3               | 2                | -1.20741            |
| 49   | 69019   | Spcs1                 | signal peptidase complex subunit 1 homolog (S. cerevisiae)              | 0               | 3               | 2                | -1.20063            |
| 50   | 13640   | Efna5                 | ephrin-A5                                                               | 0               | 3               | 2                | -1.20051            |
| 51   | 12561   | Cdh4                  | cadherin 4, type 1, R-cadherin (retinal)                                | 0               | 3               | 2                | -1.18912            |
| 52   | 21849   | Trim28                | tripartite motif containing 28                                          | 0               | 3               | 2                | -1.16675            |
| 53   | 11911   | Atf4                  | activating transcription factor 4 (tax-responsive enhancer element B67) | 0               | 3               | 2                | -1.16652            |
| 54   | 170753  | Zfp704                | zinc finger protein 704                                                 | 0               | 3               | 2                | -1.13704            |
| 55   | 18131   | Notch3                | notch 3                                                                 | 0               | 2               | 3                | -3.84783            |
| 56   | 74195   | Elp3                  | elongation protein 3 homolog (S. cerevisiae)                            | 0               | 2               | 3                | -3.79323            |
| 57   | 105148  | Iars                  | isoleucyl-tRNA synthetase                                               | 0               | 2               | 3                | -3.47262            |
| 58   | 107932  | Chd4                  | chromodomain helicase DNA binding protein 4                             | 0               | 2               | 3                | -3.39842            |
| 59   | 192212  | Prom2                 | prominin 2                                                              | 0               | 2               | 3                | -3.35551            |
| 60   | 213696  | Duoxa1                | dual oxidase maturation factor 1                                        | 0               | 2               | 3                | -3.33641            |
| 61   | 26465   | Zfp146                | zinc finger protein 146                                                 | 0               | 2               | 3                | -3.29408            |
| 62   | 76846   | Rps9                  | ribosomal protein S9                                                    | 0               | 2               | 3                | -3.26828            |
| 63   | 64929   | Scel                  | sciellin                                                                | 0               | 2               | 3                | -3.17614            |
| 64   | 93887   | Pcdhb16               | protocadherin beta 8                                                    | 0               | 2               | 3                | -3.17598            |
| 65   | 72113   | Adck1                 | aarF domain containing kinase 1                                         | 0               | 2               | 2                | -3.16383            |
| 66   | 234967  | Slc36a4               | solute carrier family 36 (proton/amino acid symporter), member 4        | 0               | 2               | 3                | -3.15241            |
| 67   | 327900  | Ubtd2 (9630054F20Rik) | ubiquitin domain containing 2                                           | 0               | 2               | 2                | -3.03834            |
| 68   | 171168  | Asah3                 | alkaline ceramidase 1                                                   | 0               | 2               | 3                | -3.00099            |
| 69   | 20227   | Sart1                 | squamous cell carcinoma antigen recognized by T cells                   | 0               | 2               | 3                | -2.97283            |
| 70   | 69786   | Tprkb                 | TP53RK binding protein                                                  | 0               | 2               | 2                | -2.89594            |

Candidates for positive regulators of oncogenic growth (Fisher's)

| Rank | entrez# | Gene Symbol           | Gene name                                                             | enriched shRNAs | depleted shRNAs | no change shRNAs | average Fold Change |
|------|---------|-----------------------|-----------------------------------------------------------------------|-----------------|-----------------|------------------|---------------------|
| 71   | 19763   | Ring1                 | ring finger protein 1                                                 | 0               | 2               | 3                | -2.82123            |
| 72   | 244954  | Prss35                | protease, serine, 35                                                  | 0               | 2               | 3                | -2.68395            |
| 73   | 259302  | Srgap3                | SLIT-ROBO Rho GTPase activating protein 3                             | 0               | 2               | 3                | -2.67071            |
| 74   | 16175   | Il1a                  | interleukin 1, alpha                                                  | 0               | 2               | 3                | -2.6705             |
| 75   | 12370   | Casp8                 | caspase 8, apoptosis-related cysteine peptidase                       | 0               | 2               | 3                | -2.61828            |
| 76   | 15929   | Idh3g                 | isocitrate dehydrogenase 3 (NAD+) gamma                               | 0               | 2               | 3                | -2.6169             |
| 77   | 14137   | Fdft1                 | farnesyl-diphosphate farnesyltransferase 1                            | 0               | 2               | 2                | -2.61194            |
| 78   | 233315  | Mtmr10 (BB128963)     | myotubularin related protein 10                                       | 0               | 2               | 3                | -2.57568            |
| 79   | 59001   | Pole3                 | polymerase (DNA directed), epsilon 3, accessory subunit               | 0               | 2               | 3                | -2.55437            |
| 80   | 276770  | Eif5a                 | eukaryotic translation initiation factor 5A                           | 0               | 2               | 3                | -2.53231            |
| 81   | 20667   | Sox12                 | SRY (sex determining region Y)-box 12                                 | 0               | 2               | 3                | -2.51997            |
| 82   | 107767  | Scamp1                | secretory carrier membrane protein 1                                  | 0               | 2               | 3                | -2.49334            |
| 83   | 66497   | 2610528E23Rik         | RIKEN cDNA 2610528E23 gene                                            | 0               | 2               | 3                | -2.49141            |
| 84   | 381979  | Brsk1                 | BR serine/threonine kinase 1                                          | 0               | 2               | 3                | -2.4846             |
| 85   | 15587   | Hyal2                 | hyaluronoglucosaminidase 2                                            | 0               | 2               | 3                | -2.48121            |
| 86   | 20024   | Sub1                  | SUB1 homolog ( <i>S. cerevisiae</i> )                                 | 0               | 2               | 3                | -2.44011            |
| 87   | 71881   | Apmap                 | adipocyte plasma membrane associated protein                          | 0               | 2               | 3                | -2.438              |
| 88   | 29870   | Gtse1                 | G-2 and S-phase expressed 1                                           | 0               | 2               | 3                | -2.43331            |
| 89   | 67383   | 2410127L17Rik         | RIKEN cDNA 2410127L17 gene                                            | 0               | 2               | 3                | -2.42349            |
| 90   | 19057   | Ppp3cc                | protein phosphatase 3, catalytic subunit, gamma isozyme               | 0               | 2               | 3                | -2.39495            |
| 91   | 228410  | Cstf3                 | cleavage stimulation factor, 3' pre-RNA, subunit 3, 77kDa             | 0               | 2               | 3                | -2.38464            |
| 92   | 54637   | Praf2                 | PRA1 domain family, member 2                                          | 0               | 2               | 3                | -2.37865            |
| 93   | 74268   | Aven                  | apoptosis, caspase activation inhibitor                               | 0               | 2               | 3                | -2.3651             |
| 94   | 107568  | Wwp1                  | WW domain containing E3 ubiquitin protein ligase 1                    | 0               | 2               | 3                | -2.35058            |
| 95   | 64008   | Aqp9                  | aquaporin 9                                                           | 0               | 2               | 3                | -2.34226            |
| 96   | 224045  | Eif2b5                | eukaryotic translation initiation factor 2B, subunit 5 epsilon, 82kDa | 0               | 2               | 3                | -2.33475            |
| 97   | 226043  | Cbwd1                 | COBW domain containing 1                                              | 0               | 2               | 3                | -2.30643            |
| 98   | 54402   | Stk19                 | serine/threonine kinase 19                                            | 0               | 2               | 3                | -2.30597            |
| 99   | 381668  | Fbrs1 (2410025L10Rik) | fibrosin-like 1                                                       | 0               | 2               | 3                | -2.29641            |
| 100  | 12447   | Ccne1                 | cyclin E1                                                             | 0               | 2               | 3                | -2.2214             |
| 101  | 19946   | Rpl30                 | ribosomal protein L30                                                 | 0               | 2               | 3                | -2.19914            |
| 102  | 11848   | Rhoa                  | ras homolog family member A                                           | 0               | 2               | 3                | -2.19805            |
| 103  | 20194   | S100a10               | S100 calcium binding protein A10                                      | 0               | 2               | 3                | -2.18906            |
| 104  | 68365   | Rab14                 | RAB14, member RAS oncogene family                                     | 0               | 2               | 3                | -2.17753            |
| 105  | 16168   | Il15                  | interleukin 15                                                        | 0               | 2               | 3                | -2.17056            |
| 106  | 75735   | Pank1                 | pantothenate kinase 1                                                 | 0               | 2               | 3                | -2.15541            |
| 107  | 71586   | Ifih1                 | interferon induced with helicase C domain 1                           | 0               | 2               | 3                | -2.15253            |

Candidates for positive regulators of oncogenic growth (Fisher's)

| Rank | entrez# | Gene Symbol  | Gene name                                                                 | enriched shRNAs | depleted shRNAs | no change shRNAs | average Fold Change |
|------|---------|--------------|---------------------------------------------------------------------------|-----------------|-----------------|------------------|---------------------|
| 108  | 72198   | Skiv2l2      | superkiller viralicidic activity 2-like 2 ( <i>S. cerevisiae</i> )        | 0               | 2               | 3                | -2.1517             |
| 109  | 237052  | Tceal1       | transcription elongation factor A (SII)-like 1                            | 0               | 2               | 3                | -2.13964            |
| 110  | 60406   | Sap30        | Sin3A-associated protein, 30kDa                                           | 0               | 2               | 3                | -2.12794            |
| 111  | 232941  | Ppm1n        | protein phosphatase, Mg2+/Mn2+ dependent, 1N (putative)                   | 0               | 2               | 3                | -2.11787            |
| 112  | 382985  | Rrm2b        | ribonucleotide reductase M2 B (TP53 inducible)                            | 0               | 2               | 3                | -2.10859            |
| 113  | 21888   | Tle4         | transducin-like enhancer of split 4 (E(sp1) homolog, <i>Drosophila</i> )  | 0               | 2               | 3                | -2.09726            |
| 114  | 12466   | Cct6a        | chaperonin containing TCP1, subunit 6A (zeta 1)                           | 0               | 2               | 3                | -2.09575            |
| 115  | 21374   | Tbp          | TATA box binding protein                                                  | 0               | 2               | 3                | -2.093              |
| 116  | 18585   | Pde9a        | phosphodiesterase 9A                                                      | 0               | 2               | 3                | -2.09013            |
| 117  | 27207   | Rps11        | ribosomal protein S11                                                     | 0               | 2               | 3                | -2.08786            |
| 118  | 74637   | Shpk (Carkl) | sedoheptulokinase                                                         | 0               | 2               | 3                | -2.06099            |
| 119  | 23938   | Map2k5       | mitogen-activated protein kinase kinase 5                                 | 0               | 2               | 3                | -2.05812            |
| 120  | 16565   | Kif21b       | kinesin family member 21B                                                 | 0               | 2               | 3                | -2.04985            |
| 121  | 66548   | Adamtsl5     | ADAMTS-like 5                                                             | 0               | 2               | 3                | -2.04603            |
| 122  | 69534   | Avpi1        | arginine vasopressin-induced 1                                            | 0               | 2               | 3                | -2.01909            |
| 123  | 19128   | Pros1        | protein S (alpha)                                                         | 0               | 2               | 3                | -2.0067             |
| 124  | 24116   | Whsc2        | Wolf-Hirschhorn syndrome candidate 2                                      | 0               | 2               | 3                | -2.00475            |
| 125  | 15525   | Hspa4        | heat shock 70kDa protein 4                                                | 0               | 2               | 3                | -2.00259            |
| 126  | 14694   | Gnb2l1       | guanine nucleotide binding protein (G protein), beta polypeptide 2-like 1 | 0               | 2               | 8                | -2.00088            |
| 127  | 13135   | Dad1         | defender against cell death 1                                             | 0               | 2               | 3                | -1.99999            |
| 128  | 19822   | Rnf4         | ring finger protein 4                                                     | 0               | 2               | 3                | -1.99638            |
| 129  | 12858   | Cox5a        | cytochrome c oxidase subunit Va                                           | 0               | 2               | 3                | -1.99175            |
| 130  | 11793   | Atg5         | autophagy related 5                                                       | 0               | 2               | 3                | -1.98001            |
| 131  | 56305   | Pitpnb       | phosphatidylinositol transfer protein, beta                               | 0               | 2               | 3                | -1.9789             |
| 132  | 56878   | Rbms1        | RNA binding motif, single stranded interacting protein 1                  | 0               | 2               | 3                | -1.97732            |
| 133  | 76559   | Atg2b        | autophagy related 2B                                                      | 0               | 2               | 2                | -1.96633            |
| 134  | 226982  | Eif5b        | eukaryotic translation initiation factor 5B                               | 0               | 2               | 2                | -1.96255            |
| 135  | 16206   | Lrig1        | leucine-rich repeats and immunoglobulin-like domains 1                    | 0               | 2               | 3                | -1.95958            |
| 136  | 13506   | Dsc2         | desmocollin 2                                                             | 0               | 2               | 3                | -1.95958            |
| 137  | 270106  | Rpl13        | ribosomal protein L13                                                     | 0               | 2               | 3                | -1.95676            |
| 138  | 12527   | Cd9          | CD9 molecule                                                              | 0               | 2               | 3                | -1.95446            |
| 139  | 18706   | Pik3ca       | phosphoinositide-3-kinase, catalytic, alpha polypeptide                   | 0               | 2               | 3                | -1.95349            |
| 140  | 57266   | Cxcl14       | chemokine (C-X-C motif) ligand 14                                         | 0               | 2               | 3                | -1.9513             |
| 141  | 11983   | Atpif1       | ATPase inhibitory factor 1                                                | 0               | 2               | 2                | -1.94855            |
| 142  | 209737  | Kif15        | kinesin family member 15                                                  | 0               | 2               | 3                | -1.94846            |
| 143  | 14634   | Gli3         | GLI family zinc finger 3                                                  | 0               | 2               | 3                | -1.94737            |
| 144  | 17765   | Mtf2         | metal response element binding transcription factor 2                     | 0               | 2               | 3                | -1.94574            |

Candidates for positive regulators of oncogenic growth (Fisher's)

| Rank | entrez# | Gene Symbol | Gene name                                                                                | enriched shRNAs | depleted shRNAs | no change shRNAs | average Fold Change |
|------|---------|-------------|------------------------------------------------------------------------------------------|-----------------|-----------------|------------------|---------------------|
| 145  | 66617   | Ntmt1       | N-terminal Xaa-Pro-Lys N-methyltransferase 1                                             | 0               | 2               | 3                | -1.93763            |
| 146  | 22032   | Traf4       | TNF receptor-associated factor 4                                                         | 0               | 2               | 3                | -1.93125            |
| 147  | 30805   | Slc22a4     | solute carrier family 22 (organic cation/ergothioneine transporter), member 4            | 0               | 2               | 3                | -1.92825            |
| 148  | 212569  | Zfp273      | zinc finger protein 273                                                                  | 0               | 2               | 3                | -1.9184             |
| 149  | 50708   | Hist1h1c    | histone cluster 1, H1c                                                                   | 0               | 2               | 3                | -1.91458            |
| 150  | 231326  | Aasdh       | aminoadipate-semialdehyde dehydrogenase                                                  | 0               | 2               | 2                | -1.91322            |
| 151  | 14869   | Gstp2       | glutathione S-transferase pi 1                                                           | 0               | 2               | 3                | -1.90012            |
| 152  | 13663   | Ei24        | etoposide induced 2.4 mRNA                                                               | 0               | 2               | 3                | -1.89958            |
| 153  | 11641   | Akap2       | A kinase (PRKA) anchor protein 2                                                         | 0               | 2               | 3                | -1.89687            |
| 154  | 231872  | Jtv1        | aminoacyl tRNA synthetase complex-interacting multifunctional protein 2                  | 0               | 2               | 3                | -1.87636            |
| 155  | 26406   | Map3k3      | mitogen-activated protein kinase kinase kinase 3                                         | 0               | 2               | 3                | -1.87365            |
| 156  | 14897   | Trip12      | thyroid hormone receptor interactor 12                                                   | 0               | 2               | 3                | -1.87173            |
| 157  | 68134   | Upf3b       | UPF3 regulator of nonsense transcripts homolog B (yeast)                                 | 0               | 2               | 3                | -1.8682             |
| 158  | 12465   | Cct5        | chaperonin containing TCP1, subunit 5 (epsilon)                                          | 0               | 2               | 3                | -1.86606            |
| 159  | 70101   | Cyp4f16     | cytochrome P450, family 4, subfamily f, polypeptide 16                                   | 0               | 2               | 3                | -1.86172            |
| 160  | 67689   | Aldh3b1     | aldehyde dehydrogenase 3 family, member B1                                               | 0               | 2               | 2                | -1.83987            |
| 161  | 26450   | Rbbp9       | retinoblastoma binding protein 9                                                         | 0               | 2               | 3                | -1.83789            |
| 162  | 67500   | Ccar1       | cell division cycle and apoptosis regulator 1                                            | 0               | 2               | 3                | -1.83474            |
| 163  | 14456   | Gas6        | growth arrest-specific 6                                                                 | 0               | 2               | 3                | -1.82776            |
| 164  | 12579   | Cdkn2b      | cyclin-dependent kinase inhibitor 2B (p15, inhibits CDK4)                                | 0               | 2               | 3                | -1.81898            |
| 165  | 20963   | Syk         | spleen tyrosine kinase                                                                   | 0               | 2               | 3                | -1.81838            |
| 166  | 329506  | Ctdspl2     | CTD (carboxy-terminal domain, RNA polymerase II, polypeptide A) small phosphatase like 2 | 0               | 2               | 3                | -1.81567            |
| 167  | 11303   | Abca1       | ATP-binding cassette, sub-family A (ABC1), member 1                                      | 0               | 2               | 3                | -1.81191            |
| 168  | 67949   | Mki67ip     | MKI67 (FHA domain) interacting nucleolar phosphoprotein                                  | 0               | 2               | 3                | -1.8071             |
| 169  | 20102   | Rps4x       | ribosomal protein S4, Y-linked 1                                                         | 0               | 2               | 3                | -1.8001             |
| 170  | 17448   | Mdh2        | malate dehydrogenase 2, NAD (mitochondrial)                                              | 0               | 2               | 3                | -1.79758            |
| 171  | 70052   | Prpf4       | PRP4 pre-mRNA processing factor 4 homolog (yeast)                                        | 0               | 2               | 3                | -1.79528            |
| 172  | 20409   | Ostf1       | osteoclast stimulating factor 1                                                          | 0               | 2               | 3                | -1.79427            |
| 173  | 66815   | Ccdc109b    | coiled-coil domain containing 109B                                                       | 0               | 2               | 2                | -1.79293            |
| 174  | 11441   | Chrna7      | cholinergic receptor, nicotinic, alpha 7 (neuronal)                                      | 0               | 2               | 3                | -1.78492            |
| 175  | 18705   | Pik3c2g     | phosphoinositide-3-kinase, class 2, gamma polypeptide                                    | 0               | 2               | 3                | -1.78423            |
| 176  | 27061   | Bcap31      | B-cell receptor-associated protein 31                                                    | 0               | 2               | 3                | -1.78275            |
| 177  | 269397  | Ss181       | synovial sarcoma translocation gene on chromosome 18-like 1                              | 0               | 2               | 3                | -1.78221            |
| 178  | 380601  | Fastkd5     | FAST kinase domains 5                                                                    | 0               | 2               | 3                | -1.77588            |
| 179  | 11777   | Ap3s1       | adaptor-related protein complex 3, sigma 1 subunit                                       | 0               | 2               | 3                | -1.77164            |
| 180  | 19359   | Rad23b      | RAD23 homolog B (S. cerevisiae)                                                          | 0               | 2               | 3                | -1.76992            |
| 181  | 229644  | Trim45      | tripartite motif containing 45                                                           | 0               | 2               | 3                | -1.76911            |

Candidates for positive regulators of oncogenic growth (Fisher's)

| Rank | entrez# | Gene Symbol          | Gene name                                                                                         | enriched shRNAs | depleted shRNAs | no change shRNAs | average Fold Change |
|------|---------|----------------------|---------------------------------------------------------------------------------------------------|-----------------|-----------------|------------------|---------------------|
| 182  | 11857   | Arhgdib              | Rho GDP dissociation inhibitor (GDI) beta                                                         | 0               | 2               | 3                | -1.75342            |
| 183  | 20861   | Stfa1                | stefin A1                                                                                         | 0               | 2               | 3                | -1.75013            |
| 184  | 78816   | Gmip                 | GEM interacting protein                                                                           | 0               | 2               | 3                | -1.74257            |
| 185  | 110012  | Gm16517              | tubulin polyglutamylase complex subunit 1                                                         | 0               | 2               | 3                | -1.7419             |
| 186  | 17865   | Mybl2                | v-myb myeloblastosis viral oncogene homolog (avian)-like 2                                        | 0               | 2               | 3                | -1.74027            |
| 187  | 19266   | Ptprd                | protein tyrosine phosphatase, receptor type, D                                                    | 0               | 2               | 2                | -1.73819            |
| 188  | 66596   | Gtf3a                | general transcription factor IIIA                                                                 | 0               | 2               | 3                | -1.73735            |
| 189  | 107250  | Kazald1              | Kazal-type serine peptidase inhibitor domain 1                                                    | 0               | 2               | 3                | -1.73672            |
| 190  | 17311   | Kitl                 | KIT ligand                                                                                        | 0               | 2               | 3                | -1.73086            |
| 191  | 66993   | Smarcd3              | SWI/SNF related, matrix associated, actin dependent regulator of chromatin, subfamily d, member 3 | 0               | 2               | 3                | -1.7308             |
| 192  | 70584   | Pak4                 | p21 protein (Cdc42/Rac)-activated kinase 4                                                        | 0               | 2               | 3                | -1.72723            |
| 193  | 70510   | Rnf167               | ring finger protein 167                                                                           | 0               | 2               | 3                | -1.72553            |
| 194  | 22123   | Psmc3                | proteasome (prosome, macropain) 26S subunit, non-ATPase, 3                                        | 0               | 2               | 3                | -1.72473            |
| 195  | 56368   | Cyb561d2             | cytochrome b-561 domain containing 2                                                              | 0               | 2               | 3                | -1.72007            |
| 196  | 14156   | Fen1                 | flap structure-specific endonuclease 1                                                            | 0               | 2               | 3                | -1.70703            |
| 197  | 14423   | Galnt1               | UDP-N-acetyl-alpha-D-galactosamine:polypeptide N-acetylgalactosaminyltransferase 1 (GalNAc-T1)    | 0               | 2               | 2                | -1.70416            |
| 198  | 20437   | Siah1a               | siah E3 ubiquitin protein ligase 1                                                                | 0               | 2               | 3                | -1.70266            |
| 199  | 214505  | Gnptg                | N-acetylglucosamine-1-phosphate transferase, gamma subunit                                        | 0               | 2               | 3                | -1.69906            |
| 200  | 16666   | Krt1-16              | keratin 16                                                                                        | 0               | 2               | 3                | -1.69536            |
| 201  | 20643   | Snrpe                | small nuclear ribonucleoprotein polypeptide E                                                     | 0               | 2               | 3                | -1.69534            |
| 202  | 19719   | Rfng                 | RFNG O-fucosylpeptide 3-beta-N-acetylglucosaminyltransferase                                      | 0               | 2               | 3                | -1.69361            |
| 203  | 18475   | Pafah1b2             | platelet-activating factor acetylhydrolase 1b, catalytic subunit 2 (30kDa)                        | 0               | 2               | 3                | -1.69309            |
| 204  | 16450   | Jag2                 | jagged 2                                                                                          | 0               | 2               | 3                | -1.67738            |
| 205  | 229681  | St7l                 | suppression of tumorigenicity 7 like                                                              | 0               | 2               | 3                | -1.67653            |
| 206  | 20815   | Srpk1                | SRSF protein kinase 1                                                                             | 0               | 2               | 3                | -1.67631            |
| 207  | 329015  | Atg2a                | autophagy related 2A                                                                              | 0               | 2               | 2                | -1.67343            |
| 208  | 102626  | Mapkapk3             | mitogen-activated protein kinase-activated protein kinase 3                                       | 0               | 2               | 8                | -1.6691             |
| 209  | 53890   | Sart3                | squamous cell carcinoma antigen recognized by T cells 3                                           | 0               | 2               | 3                | -1.6668             |
| 210  | 75578   | Fggy (2310009E04Rik) | FGGY carbohydrate kinase domain containing                                                        | 0               | 2               | 3                | -1.66382            |
| 211  | 65019   | Rpl23                | ribosomal protein L23                                                                             | 0               | 2               | 3                | -1.66326            |
| 212  | 210808  | Lacc1                | laccase (multicopper oxidoreductase) domain containing 1                                          | 0               | 2               | 2                | -1.66035            |
| 213  | 16918   | Mycl1                | v-myc myelocytomatosis viral oncogene homolog 1, lung carcinoma derived (avian)                   | 0               | 2               | 2                | -1.65618            |
| 214  | 14365   | Fzd3                 | frizzled family receptor 3                                                                        | 0               | 2               | 3                | -1.65606            |
| 215  | 22652   | Mkrn3                | makorin ring finger protein 3                                                                     | 0               | 2               | 2                | -1.65574            |
| 216  | 27984   | Efh2                 | EF-hand domain family, member D2                                                                  | 0               | 2               | 3                | -1.65465            |
| 217  | 494448  | Cbx6                 | chromobox homolog 6                                                                               | 0               | 2               | 3                | -1.65429            |
| 218  | 28295   | D10Jhu81e            | chromosome 21 open reading frame 33                                                               | 0               | 2               | 2                | -1.65199            |

Candidates for positive regulators of oncogenic growth (Fisher's)

| Rank | entrez# | Gene Symbol | Gene name                                                                                   | enriched shRNAs | depleted shRNAs | no change shRNAs | average Fold Change |
|------|---------|-------------|---------------------------------------------------------------------------------------------|-----------------|-----------------|------------------|---------------------|
| 219  | 56457   | Ciptm1      | cleft lip and palate associated transmembrane protein 1                                     | 0               | 2               | 3                | -1.64579            |
| 220  | 23950   | Dnajb6      | DnaJ (Hsp40) homolog, subfamily B, member 6                                                 | 0               | 2               | 3                | -1.6401             |
| 221  | 74349   | Fam160a2    | family with sequence similarity 160, member A2                                              | 0               | 2               | 3                | -1.639              |
| 222  | 19300   | Abcd4       | ATP-binding cassette, sub-family D (ALD), member 4                                          | 0               | 2               | 3                | -1.63591            |
| 223  | 268510  | Mgat5b      | mannosyl (alpha-1,6-)-glycoprotein beta-1,6-N-acetyl-glucosaminyltransferase, isozyme B     | 0               | 2               | 3                | -1.63379            |
| 224  | 67027   | Mkrn2       | makorin ring finger protein 2                                                               | 0               | 2               | 3                | -1.63375            |
| 225  | 114663  | Impa2       | inositol(myo)-1(or 4)-monophosphatase 2                                                     | 0               | 2               | 3                | -1.63288            |
| 226  | 53621   | Cnot4       | CCR4-NOT transcription complex, subunit 4                                                   | 0               | 2               | 3                | -1.62787            |
| 227  | 74342   | Lrrtm1      | leucine rich repeat transmembrane neuronal 1                                                | 0               | 2               | 3                | -1.62638            |
| 228  | 214137  | Arhgap29    | Rho GTPase activating protein 29                                                            | 0               | 2               | 3                | -1.62485            |
| 229  | 17084   | Ly86        | lymphocyte antigen 86                                                                       | 0               | 2               | 3                | -1.62295            |
| 230  | 18805   | Pld1        | phospholipase D1, phosphatidylcholine-specific                                              | 0               | 2               | 3                | -1.62225            |
| 231  | 11739   | Slc25a4     | solute carrier family 25 (mitochondrial carrier; adenine nucleotide translocator), member 4 | 0               | 2               | 3                | -1.61845            |
| 232  | 75607   | Wnk2        | WNK lysine deficient protein kinase 2                                                       | 0               | 2               | 3                | -1.61833            |
| 233  | 70405   | Calml3      | calmodulin-like 3                                                                           | 0               | 2               | 3                | -1.61756            |
| 234  | 16832   | Ldhb        | lactate dehydrogenase B                                                                     | 0               | 2               | 3                | -1.61594            |
| 235  | 29875   | Iqgap1      | IQ motif containing GTPase activating protein 1                                             | 0               | 2               | 3                | -1.61395            |
| 236  | 224836  | Usp49       | ubiquitin specific peptidase 49                                                             | 0               | 2               | 3                | -1.61114            |
| 237  | 26886   | Cenph       | centromere protein H                                                                        | 0               | 2               | 3                | -1.60844            |
| 238  | 215351  | Senp6       | SUMO1/sentrin specific peptidase 6                                                          | 0               | 2               | 3                | -1.60587            |
| 239  | 52679   | E2f7        | E2F transcription factor 7                                                                  | 0               | 2               | 3                | -1.6023             |
| 240  | 78308   | Gpr108      | G protein-coupled receptor 108                                                              | 0               | 2               | 3                | -1.6022             |
| 241  | 15932   | Idua        | iduronidase, alpha-L-                                                                       | 0               | 2               | 2                | -1.60174            |
| 242  | 97848   | Serpinh6c   | serine (or cysteine) peptidase inhibitor, clade B, member 6c                                | 0               | 2               | 3                | -1.59578            |
| 243  | 208518  | Cep78       | centrosomal protein 78kDa                                                                   | 0               | 2               | 3                | -1.59235            |
| 244  | 20620   | Plk2        | polo-like kinase 2                                                                          | 0               | 2               | 3                | -1.59206            |
| 245  | 12295   | Cacnb1      | calcium channel, voltage-dependent, beta 1 subunit                                          | 0               | 2               | 3                | -1.59082            |
| 246  | 83429   | Ctns        | cystinosin, lysosomal cystine transporter                                                   | 0               | 2               | 3                | -1.58833            |
| 247  | 20713   | Serpini1    | serpin peptidase inhibitor, clade I (neuroserpin), member 1                                 | 0               | 2               | 3                | -1.58546            |
| 248  | 50874   | Tmod4       | tropomodulin 4 (muscle)                                                                     | 0               | 2               | 3                | -1.58294            |
| 249  | 84004   | Mcam        | melanoma cell adhesion molecule                                                             | 0               | 2               | 3                | -1.57188            |
| 250  | 55984   | Camkk1      | calcium/calmodulin-dependent protein kinase kinase 1, alpha                                 | 0               | 2               | 3                | -1.57043            |
| 251  | 58231   | Stk4        | serine/threonine kinase 4                                                                   | 0               | 2               | 3                | -1.56927            |
| 252  | 106707  | Rpsud1      | RNA pseudouridylate synthase domain containing 1                                            | 0               | 2               | 3                | -1.56634            |
| 253  | 26394   | Lypla2      | lysophospholipase II                                                                        | 0               | 2               | 3                | -1.56217            |
| 254  | 68953   | Chmp2a      | charged multivesicular body protein 2A                                                      | 0               | 2               | 3                | -1.56178            |
| 255  | 110750  | Cse1l       | CSE1 chromosome segregation 1-like (yeast)                                                  | 0               | 2               | 3                | -1.56114            |

Candidates for positive regulators of oncogenic growth (Fisher's)

| Rank | entrez# | Gene Symbol       | Gene name                                                                    | enriched shRNAs | depleted shRNAs | no change shRNAs | average Fold Change |
|------|---------|-------------------|------------------------------------------------------------------------------|-----------------|-----------------|------------------|---------------------|
| 256  | 230157  | Tmeff1            | transmembrane protein with EGF-like and two follistatin-like domains 1       | 0               | 2               | 3                | -1.55631            |
| 257  | 66860   | Tanc1             | tetratricopeptide repeat, ankyrin repeat and coiled-coil containing 1        | 0               | 2               | 2                | -1.54853            |
| 258  | 214897  | Csnk1g1           | casein kinase 1, gamma 1                                                     | 0               | 2               | 3                | -1.53484            |
| 259  | 103172  | Ndg2              | coiled-coil-helix-coiled-coil-helix domain containing 10                     | 0               | 2               | 2                | -1.53065            |
| 260  | 20068   | Rps17             | ribosomal protein S17                                                        | 0               | 2               | 3                | -1.52827            |
| 261  | 21354   | Tap1              | transporter 1, ATP-binding cassette, sub-family B (MDR/TAP)                  | 0               | 2               | 3                | -1.5282             |
| 262  | 218699  | Pxk               | PX domain containing serine/threonine kinase                                 | 0               | 2               | 3                | -1.52544            |
| 263  | 16204   | Fabp6             | fatty acid binding protein 6, ileal                                          | 0               | 2               | 3                | -1.52452            |
| 264  | 93707   | Pcdhgc4           | protocadherin gamma subfamily C, 4                                           | 0               | 2               | 3                | -1.5236             |
| 265  | 12416   | Cbx2              | chromobox homolog 2                                                          | 0               | 2               | 3                | -1.52191            |
| 266  | 210925  | Ints9             | integrator complex subunit 9                                                 | 0               | 2               | 2                | -1.51936            |
| 267  | 18605   | Enpp1             | ectonucleotide pyrophosphatase/phosphodiesterase 1                           | 0               | 2               | 3                | -1.51847            |
| 268  | 74103   | Nebi              | nebulette                                                                    | 0               | 2               | 3                | -1.51689            |
| 269  | 140483  | Hnmt              | histamine N-methyltransferase                                                | 0               | 2               | 3                | -1.50997            |
| 270  | 240066  | Zfp870 (BC066107) | zinc finger protein 870                                                      | 0               | 2               | 3                | -1.50668            |
| 271  | 212998  | BC016579          | cDNA sequence BC016579                                                       | 0               | 2               | 2                | -1.50569            |
| 272  | 228545  | Vps18             | vacuolar protein sorting 18 homolog ( <i>S. cerevisiae</i> )                 | 0               | 2               | 3                | -1.50406            |
| 273  | 259279  | Tubgcp3           | tubulin, gamma complex associated protein 3                                  | 0               | 2               | 3                | -1.50375            |
| 274  | 19982   | Rpl36a            | ribosomal protein L36a                                                       | 0               | 2               | 3                | -1.5012             |
| 275  | 26894   | Cops7a            | COP9 constitutive photomorphogenic homolog subunit 7A ( <i>Arabidopsis</i> ) | 0               | 2               | 2                | -1.50039            |
| 276  | 72935   | Ddx41             | DEAD (Asp-Glu-Ala-Asp) box polypeptide 41                                    | 0               | 2               | 3                | -1.50006            |



Candidates for negative regulators of oncogenic growth (Fisher's)

| Rank | entrez# | Gene Symbol         | Gene name                                                                  | enriched shRNAs | depleted shRNAs | no change shRNAs | average Fold Change |
|------|---------|---------------------|----------------------------------------------------------------------------|-----------------|-----------------|------------------|---------------------|
| 1    | 17760   | Mtap6               | microtubule-associated protein 6                                           | 4               | 0               | 1                | 1.504101            |
| 2    | 99650   | 4933434E20Rik       | RIKEN cDNA 4933434E20 gene                                                 | 4               | 0               | 1                | 1.335483            |
| 3    | 19240   | Tmsb10              | thymosin beta 4, X-linked                                                  | 3               | 0               | 1                | 2.997635            |
| 4    | 20912   | Stxbp3a             | syntaxin binding protein 3                                                 | 3               | 0               | 2                | 2.393958            |
| 5    | 214601  | Slc10a3             | solute carrier family 10 (sodium/bile acid cotransporter family), member 3 | 3               | 0               | 2                | 2.352889            |
| 6    | 216440  | Os9 (4632413K17Rik) | osteosarcoma amplified 9, endoplasmic reticulum lectin                     | 3               | 0               | 1                | 2.186796            |
| 7    | 12583   | Cdo1                | cysteine dioxygenase, type I                                               | 3               | 0               | 2                | 2.18178             |
| 8    | 242285  | Sdr16c5 (Rdhe2)     | short chain dehydrogenase/reductase family 16C, member 5                   | 3               | 0               | 2                | 2.167538            |
| 9    | 18103   | Nme2                | NME/NM23 nucleoside diphosphate kinase 2                                   | 3               | 0               | 7                | 2.034861            |
| 10   | 21838   | Thy1                | Thy-1 cell surface antigen                                                 | 3               | 0               | 2                | 1.928814            |
| 11   | 21956   | Tnnt2               | troponin T type 2 (cardiac)                                                | 3               | 0               | 2                | 1.815209            |
| 12   | 215748  | Cnksr3              | CNKSR family member 3                                                      | 3               | 0               | 2                | 1.752163            |
| 13   | 242819  | Rundc3b (Gm440)     | RUN domain containing 3B                                                   | 3               | 0               | 2                | 1.701845            |
| 14   | 17966   | Nbr1                | neighbor of BRCA1 gene 1                                                   | 3               | 0               | 2                | 1.602133            |
| 15   | 67145   | Tom34               | translocase of outer mitochondrial membrane 34                             | 3               | 0               | 2                | 1.467991            |
| 16   | 12946   | Cr1 (Crry)          | complement component (3b/4b) receptor 1-like                               | 3               | 0               | 2                | 1.354341            |
| 17   | 13688   | Eif4ebp2            | eukaryotic translation initiation factor 4E binding protein 2              | 3               | 0               | 2                | 1.340723            |
| 18   | 70396   | Asnsd1              | asparagine synthetase domain containing 1                                  | 3               | 0               | 2                | 1.324157            |
| 19   | 72141   | Adpgk               | ADP-dependent glucokinase                                                  | 3               | 0               | 2                | 1.29385             |
| 20   | 13618   | Ednrb               | endothelin receptor type B                                                 | 3               | 0               | 2                | 1.246541            |
| 21   | 56462   | Mtch1               | mitochondrial carrier 1                                                    | 2               | 0               | 3                | 4.115456            |
| 22   | 14609   | Gja1                | gap junction protein, alpha 1, 43kDa                                       | 2               | 0               | 3                | 4.031505            |
| 23   | 14381   | G6pdx               | glucose-6-phosphate dehydrogenase                                          | 2               | 0               | 3                | 3.517335            |
| 24   | 57358   | Cmar (Spg7)         | spastic paraplegia 7 (pure and complicated autosomal recessive)            | 2               | 0               | 3                | 3.404294            |
| 25   | 109077  | Ints5               | integrator complex subunit 5                                               | 2               | 0               | 3                | 3.328553            |
| 26   | 109815  | H47                 | VCP-interacting membrane protein                                           | 2               | 0               | 2                | 3.182336            |
| 27   | 17342   | Mitf                | microphthalmia-associated transcription factor                             | 2               | 0               | 3                | 3.084003            |
| 28   | 53328   | Pgrmc1              | progesterone receptor membrane component 1                                 | 2               | 0               | 3                | 3.03049             |
| 29   | 12830   | Col4a5              | collagen, type IV, alpha 5                                                 | 2               | 0               | 3                | 2.961371            |
| 30   | 66320   | Tmem208 (Hspc171)   | transmembrane protein 208                                                  | 2               | 0               | 3                | 2.957803            |
| 31   | 20850   | Stat5a              | signal transducer and activator of transcription 5A                        | 2               | 0               | 3                | 2.946551            |
| 32   | 18117   | Emc8                | ER membrane protein complex subunit 8                                      | 2               | 0               | 2                | 2.894288            |
| 33   | 193813  | Mcf2                | multiple coagulation factor deficiency 2                                   | 2               | 0               | 2                | 2.888546            |
| 34   | 22333   | Vdac1               | voltage-dependent anion channel 1                                          | 2               | 0               | 3                | 2.848489            |
| 35   | 64136   | Sdf2l1              | stromal cell-derived factor 2-like 1                                       | 2               | 0               | 3                | 2.828783            |
| 36   | 21754   | Tesk1               | testis-specific kinase 1                                                   | 2               | 0               | 3                | 2.787309            |
| 37   | 24071   | Synj2bp             | synaptojanin 2 binding protein                                             | 2               | 0               | 3                | 2.786967            |

Candidates for negative regulators of oncogenic growth (Fisher's)

| Rank | entrez# | Gene Symbol       | Gene name                                                                                   | enriched shRNAs | depleted shRNAs | no change shRNAs | average Fold Change |
|------|---------|-------------------|---------------------------------------------------------------------------------------------|-----------------|-----------------|------------------|---------------------|
| 38   | 78088   | Sowahb            | sosondowah ankyrin repeat domain family member B                                            | 2               | 0               | 3                | 2.736565            |
| 39   | 23808   | Ash2l             | ash2 (absent, small, or homeotic)-like (Drosophila)                                         | 2               | 0               | 3                | 2.640771            |
| 40   | 56289   | Rassf1            | Ras association (RalGDS/AF-6) domain family member 1                                        | 2               | 0               | 3                | 2.622498            |
| 41   | 14957   | Hist1h1d          | histone cluster 1, H1d                                                                      | 2               | 0               | 3                | 2.578884            |
| 42   | 227800  | Rabgap1           | RAB GTPase activating protein 1                                                             | 2               | 0               | 2                | 2.471741            |
| 43   | 107652  | Uap1              | UDP-N-acteylglucosamine pyrophosphorylase 1                                                 | 2               | 0               | 3                | 2.449981            |
| 44   | 22627   | Ywhae             | tyrosine 3-monooxygenase/tryptophan 5-monooxygenase activation protein, epsilon polypeptide | 2               | 0               | 3                | 2.383973            |
| 45   | 114301  | Palmd             | palmdelphin                                                                                 | 2               | 0               | 3                | 2.374722            |
| 46   | 69029   | 1500032L24Rik     | RIKEN cDNA 1500032L24 gene                                                                  | 2               | 0               | 3                | 2.348735            |
| 47   | 12497   | Entpd6            | ectonucleoside triphosphate diphosphohydrolase 6 (putative)                                 | 2               | 0               | 3                | 2.320445            |
| 48   | 11854   | Rhod              | ras homolog family member D                                                                 | 2               | 0               | 3                | 2.280416            |
| 49   | 23856   | Dido1             | death inducer-obliterator 1                                                                 | 2               | 0               | 2                | 2.274753            |
| 50   | 233890  | Zfp768 (BC026432) | zinc finger protein 768                                                                     | 2               | 0               | 3                | 2.267083            |
| 51   | 11546   | Parp2             | poly (ADP-ribose) polymerase 2                                                              | 2               | 0               | 3                | 2.242664            |
| 52   | 56419   | Diap3             | diaphanous homolog 3 (Drosophila)                                                           | 2               | 0               | 3                | 2.232301            |
| 53   | 69253   | Hspb2             | heat shock 27kDa protein 2                                                                  | 2               | 0               | 3                | 2.230754            |
| 54   | 17423   | Ndst2             | N-deacetylase/N-sulfotransferase (heparan glucosaminyl) 2                                   | 2               | 0               | 3                | 2.212722            |
| 55   | 74133   | 1200011M11Rik     | smg-8 homolog, nonsense mediated mRNA decay factor (C. elegans)                             | 2               | 0               | 3                | 2.191855            |
| 56   | 16211   | Kpnb1             | karyopherin (importin) beta 1                                                               | 2               | 0               | 3                | 2.187491            |
| 57   | 229445  | Ctso              | cathepsin O                                                                                 | 2               | 0               | 3                | 2.151808            |
| 58   | 68219   | Nudt21            | nudix (nucleoside diphosphate linked moiety X)-type motif 21                                | 2               | 0               | 3                | 2.121114            |
| 59   | 65079   | Rtn4r             | reticulin 4 receptor                                                                        | 2               | 0               | 3                | 2.089179            |
| 60   | 170750  | Xpnpep1           | X-prolyl aminopeptidase (aminopeptidase P) 1, soluble                                       | 2               | 0               | 3                | 2.084535            |
| 61   | 76608   | Hectd3            | HECT domain containing E3 ubiquitin protein ligase 3                                        | 2               | 0               | 3                | 2.076412            |
| 62   | 27756   | Lsm2              | LSM2 homolog, U6 small nuclear RNA associated (S. cerevisiae)                               | 2               | 0               | 3                | 2.071125            |
| 63   | 23959   | Nt5e              | 5'-nucleotidase, ecto (CD73)                                                                | 2               | 0               | 3                | 2.034553            |
| 64   | 11477   | Acvr1             | activin A receptor, type I                                                                  | 2               | 0               | 3                | 1.998632            |
| 65   | 16157   | Il11ra1           | interleukin 11 receptor, alpha                                                              | 2               | 0               | 3                | 1.941139            |
| 66   | 66665   | 5730528L13Rik     | Myb/SANT-like DNA-binding domain containing 3                                               | 2               | 0               | 3                | 1.939924            |
| 67   | 269338  | Vps39             | vacuolar protein sorting 39 homolog (S. cerevisiae)                                         | 2               | 0               | 3                | 1.92889             |
| 68   | 71446   | Wrb               | tryptophan rich basic protein                                                               | 2               | 0               | 3                | 1.91818             |
| 69   | 330361  | AW146020          | GC-rich sequence DNA-binding factor 2                                                       | 2               | 0               | 3                | 1.913966            |
| 70   | 23991   | Cib1              | calcium and integrin binding 1 (calmyrin)                                                   | 2               | 0               | 3                | 1.91351             |
| 71   | 20660   | Sorl1             | sortilin-related receptor, L(DLR class) A repeats containing                                | 2               | 0               | 2                | 1.903269            |
| 72   | 17714   | Grpel2            | GrpE-like 2, mitochondrial (E. coli)                                                        | 2               | 0               | 2                | 1.901428            |
| 73   | 11828   | Aqp3              | aquaporin 3 (Gill blood group)                                                              | 2               | 0               | 3                | 1.878379            |
| 74   | 21930   | Tnfaip6           | tumor necrosis factor, alpha-induced protein 6                                              | 2               | 0               | 3                | 1.875452            |

Candidates for negative regulators of oncogenic growth (Fisher's)

| Rank | entrez# | Gene Symbol            | Gene name                                                                             | enriched shRNAs | depleted shRNAs | no change shRNAs | average Fold Change |
|------|---------|------------------------|---------------------------------------------------------------------------------------|-----------------|-----------------|------------------|---------------------|
| 75   | 100737  | Dcun1d4                | DCN1, defective in cullin neddylation 1, domain containing 4 ( <i>S. cerevisiae</i> ) | 2               | 0               | 2                | 1.866643            |
| 76   | 15159   | Hccs                   | holocytochrome c synthase                                                             | 2               | 0               | 3                | 1.856507            |
| 77   | 53608   | Map3k6                 | mitogen-activated protein kinase kinase kinase 6                                      | 2               | 0               | 3                | 1.845115            |
| 78   | 71745   | Cul2                   | cullin 2                                                                              | 2               | 0               | 3                | 1.843076            |
| 79   | 66871   | Cpne8                  | copine VIII                                                                           | 2               | 0               | 3                | 1.835332            |
| 80   | 26951   | Zw10                   | ZW10, kinetochore associated, homolog ( <i>Drosophila</i> )                           | 2               | 0               | 3                | 1.816004            |
| 81   | 70351   | Ppp4r1                 | protein phosphatase 4, regulatory subunit 1                                           | 2               | 0               | 3                | 1.801579            |
| 82   | 68185   | Chchd8                 | coiled-coil-helix-coiled-coil-helix domain containing 8                               | 2               | 0               | 3                | 1.800265            |
| 83   | 16372   | Irx2                   | iroquois homeobox 2                                                                   | 2               | 0               | 3                | 1.797388            |
| 84   | 26885   | Casp8ap2               | caspase 8 associated protein 2                                                        | 2               | 0               | 3                | 1.791817            |
| 85   | 56440   | Snx1                   | sorting nexin 1                                                                       | 2               | 0               | 3                | 1.785254            |
| 86   | 72349   | Dusp3                  | dual specificity phosphatase 3                                                        | 2               | 0               | 3                | 1.78234             |
| 87   | 19335   | Rab23                  | RAB23, member RAS oncogene family                                                     | 2               | 0               | 3                | 1.77411             |
| 88   | 225849  | Ppp2r5b                | protein phosphatase 2, regulatory subunit B', beta                                    | 2               | 0               | 3                | 1.770982            |
| 89   | 26891   | Cops4                  | COP9 constitutive photomorphogenic homolog subunit 4 ( <i>Arabidopsis</i> )           | 2               | 0               | 3                | 1.767117            |
| 90   | 237500  | Tmtc3                  | transmembrane and tetratricopeptide repeat containing 3                               | 2               | 0               | 2                | 1.766351            |
| 91   | 228866  | Pcif1 (F730014I05Rik)  | PDX1 C-terminal inhibiting factor 1                                                   | 2               | 0               | 3                | 1.743279            |
| 92   | 68239   | Krt42 (2410039E07Rik)  | keratin 42                                                                            | 2               | 0               | 3                | 1.734422            |
| 93   | 108927  | Lhfp                   | lipoma HMGIC fusion partner                                                           | 2               | 0               | 3                | 1.715071            |
| 94   | 12816   | Col12a1                | collagen, type XII, alpha 1                                                           | 2               | 0               | 3                | 1.713318            |
| 95   | 65246   | Xpo7                   | exportin 7                                                                            | 2               | 0               | 3                | 1.711696            |
| 96   | 19210   | Ptdss1                 | phosphatidylserine synthase 1                                                         | 2               | 0               | 3                | 1.709867            |
| 97   | 15902   | Id2                    | inhibitor of DNA binding 2, dominant negative helix-loop-helix protein                | 2               | 0               | 3                | 1.706014            |
| 98   | 269328  | Muc15                  | mucin 15, cell surface associated                                                     | 2               | 0               | 2                | 1.70209             |
| 99   | 216119  | Ybey (A130042E20Rik)   | ybeY metalloproteinase (putative)                                                     | 2               | 0               | 2                | 1.694963            |
| 100  | 69612   | Kansl2                 | KAT8 regulatory NSL complex subunit 2                                                 | 2               | 0               | 2                | 1.690599            |
| 101  | 66184   | Rps4y2 (1110033J19Rik) | ribosomal protein S4, Y-linked 2                                                      | 2               | 0               | 3                | 1.674935            |
| 102  | 18203   | Ntan1                  | N-terminal asparagine amidase                                                         | 2               | 0               | 3                | 1.668233            |
| 103  | 268564  | Zbtb1                  | zinc finger and BTB domain containing 1                                               | 2               | 0               | 3                | 1.64775             |
| 104  | 216453  | Rdh19                  | retinol dehydrogenase 1 (all trans)                                                   | 2               | 0               | 3                | 1.646191            |
| 105  | 75782   | Lca5 (4930431B11Rik)   | Leber congenital amaurosis 5                                                          | 2               | 0               | 3                | 1.645394            |
| 106  | 26914   | H2afy                  | H2A histone family, member Y                                                          | 2               | 0               | 3                | 1.637421            |
| 107  | 67619   | Nob1                   | NIN1/RPN12 binding protein 1 homolog ( <i>S. cerevisiae</i> )                         | 2               | 0               | 3                | 1.637211            |
| 108  | 66839   | 0610009O20Rik          | RIKEN cDNA 0610009O20 gene                                                            | 2               | 0               | 3                | 1.633545            |
| 109  | 319178  | Hist1h2bb              | histone cluster 1, H2bb                                                               | 2               | 0               | 3                | 1.631491            |
| 110  | 80838   | Hist1h1a               | histone cluster 1, H1a                                                                | 2               | 0               | 3                | 1.624471            |
| 111  | 68449   | Tbc1d10b               | TBC1 domain family, member 10B                                                        | 2               | 0               | 3                | 1.622633            |

Candidates for negative regulators of oncogenic growth (Fisher's)

| Rank | entrez# | Gene Symbol            | Gene name                                                      | enriched shRNAs | depleted shRNAs | no change shRNAs | average Fold Change |
|------|---------|------------------------|----------------------------------------------------------------|-----------------|-----------------|------------------|---------------------|
| 112  | 380785  | Begain (BM948371)      | brain-enriched guanylate kinase-associated homolog (rat)       | 2               | 0               | 3                | 1.618538            |
| 113  | 330657  | Prss53 (BC039632)      | protease, serine, 53                                           | 2               | 0               | 3                | 1.618312            |
| 114  | 20688   | Sp4                    | Sp4 transcription factor                                       | 2               | 0               | 3                | 1.617765            |
| 115  | 106393  | Srl                    | sarcalumenin                                                   | 2               | 0               | 3                | 1.614678            |
| 116  | 17913   | Myo1c                  | myosin IC                                                      | 2               | 0               | 3                | 1.614225            |
| 117  | 52840   | Dbndd2                 | dysbindin (dystrobrevin binding protein 1) domain containing 2 | 2               | 0               | 2                | 1.598134            |
| 118  | 67103   | Ptgr1 (Ltb4dh)         | prostaglandin reductase 1                                      | 2               | 0               | 3                | 1.573039            |
| 119  | 228361  | Ambra1 (D030051N19Rik) | autophagy/beclin-1 regulator 1                                 | 2               | 0               | 3                | 1.568679            |
| 120  | 70454   | Cenpl                  | centromere protein L                                           | 2               | 0               | 2                | 1.566376            |
| 121  | 232314  | Ppp4r2                 | protein phosphatase 4, regulatory subunit 2                    | 2               | 0               | 3                | 1.561153            |
| 122  | 71908   | Cldn23                 | claudin 23                                                     | 2               | 0               | 2                | 1.555402            |
| 123  | 19691   | Recql                  | RecQ protein-like (DNA helicase Q1-like)                       | 2               | 0               | 3                | 1.547136            |
| 124  | 228136  | Zdhhc5                 | zinc finger, DHHC-type containing 5                            | 2               | 0               | 3                | 1.542208            |
| 125  | 67938   | Myl12b (Mylc2b)        | myosin, light chain 12B, regulatory                            | 2               | 0               | 3                | 1.539765            |
| 126  | 12176   | Bnip3                  | BCL2/adenovirus E1B 19kDa interacting protein 3                | 2               | 0               | 3                | 1.538725            |
| 127  | 67006   | Cisd2 (1500009M05Rik)  | CDGSH iron sulfur domain 2                                     | 2               | 0               | 3                | 1.512992            |
| 128  | 71306   | Mfap3l                 | microfibrillar-associated protein 3-like                       | 2               | 0               | 3                | 1.503454            |

**Supplementary Table 5. Sequence of shRNA constructs used in the study**

| Gene symbol    | shRNA name    | cloneld          | shRNA target sequence   |
|----------------|---------------|------------------|-------------------------|
| Anapc5         | shAnapc5#2180 | TRCN0000088403   | GCCAAGAACTACTTTGCACAA   |
| Anapc5         | shAnapc5#308  | TRCN0000088404   | GCCCAGATATTACACTGTCAA   |
| Anapc5         | shAnapc5#748  | TRCN0000088405   | GCCGCTTTGTTGAAGAATGAT   |
| Anapc5         | shAnapc5#847  | TRCN0000088406   | GCTCATTACCTCAGCTACTTA   |
| Anapc5         | shAnapc5#412  | TRCN0000088407   | CTGAAGGATATGGAACAATTT   |
| Hras1          | shHras1#88    | TRCN0000034379   | GACGAGTATGATCCCCTACTATA |
| Hras1          | shHras1#249   | TRCN0000034380   | CATCAACAACACCAAGTCCTT   |
| Hras1          | shHras1#267   | TRCN0000034381   | CTTCGAGGACATCCATCAGTA   |
| Hras1          | shHras1#304   | TRCN0000034382   | CGGGTGAAAGATTTCAGATGAT  |
| Hras1          | shHras1#147   | TRCN0000034383   | GACATGTCTACTGGACTACTT   |
| Mllt6          | shMllt6#4294  | TRCN0000126604   | CCTGTCTGTCTATCTGTCATT   |
| Mllt6          | shMllt6#1916  | TRCN0000126605   | GCAGGCATCTATAACCAGTAAT  |
| Mllt6          | shMllt6#1076  | TRCN0000126606   | CGAAAGGACAAAGAACGCCTT   |
| Mllt6          | shMllt6#1269  | TRCN0000126607   | GCCTGAGTCATAAGGACAAGA   |
| Mllt6          | shMllt6#1271  | TRCN0000126608   | CTGAGTCATAAGGACAAGAAA   |
| Ctnnb1         | shCtnnb1#3056 | TRCN0000012688   | GCGTTATCAAACCCTAGCCTT   |
| Ctnnb1         | shCtnnb1#2001 | TRCN0000012689   | CCATTGTTTGTGCAGTTGCTT   |
| Ctnnb1         | shCtnnb1#450  | TRCN0000012690   | GCTGATATTGACGGGCAGTAT   |
| Ctnnb1         | shCtnnb1#594  | TRCN0000012691   | CCATCACAGATGTTGAAACAT   |
| Ctnnb1         | shCtnnb1#1174 | TRCN0000012692   | CCCAAGCCTTAGTAAACATAA   |
| Mllt6 (human)  | shMllt6#926   | custom generated | AGCCATAGCCTGAGTCATAAA   |
| Mllt6 (human)  | shMllt6#220   | custom generated | GCATTGAAGAGGACTGATAAT   |
| Ctnnb1 (human) | shCtnnb1#2708 | custom generated | GGGAGTGGTTTAGGCTATTTG   |
| Ctnnb1 (human) | shCtnnb1#1541 | custom generated | TCTAACCTCACTTGCAATAAT   |
